# Supplementary material for: An SDS-PAGE based proteomic approach for N-terminome profiling
Source: Royal Society of Chemistry journal article supplement (doi:10.1039/c9an01616c), 2019-01-01
Supplement: c9an01616c2.xlsx [file c9an01616c2.xlsx]

## Sheet: Table-S1
Checked	Confidence	Annotated Sequence	P1 AA	Modifications	Modifications in Proteins	Contaminant	Qvality PEP	Qvality q-value	# Protein Groups	# Proteins	# PSMs	Master Protein Accessions	Positions in Proteins	# Missed Cleavages	Theo. MH+ [Da]	# Razor Quan Results	Abundance Ratio: (20 min) / (0 min)	Abundance Ratio: (40 min) / (0 min)	Abundance Ratio: (60 min) / (0 min)	Abundance Ratio Adj. P-Value: (20 min) / (0 min)	Abundance Ratio Adj. P-Value: (40 min) / (0 min)	Abundance Ratio Adj. P-Value: (60 min) / (0 min)	Abundance Ratio Variability [%]: (20 min) / (0 min)	Abundance Ratio Variability [%]: (40 min) / (0 min)	Abundance Ratio Variability [%]: (60 min) / (0 min)	Abundances (Grouped): 0 min	Abundances (Grouped): 20 min	Abundances (Grouped): 40 min	Abundances (Grouped): 60 min	Quan Info	Found in Sample: [S1] F1: Sample, 0 min	Found in Sample: [S2] F2: Sample, 20 min	Found in Sample: [S3] F3: Sample, 40 min	Found in Sample: [S4] F4: Sample, 60 min	Confidence (by Search Engine): Sequest HT	Percolator q-Value (by Search Engine): Sequest HT	Percolator PEP (by Search Engine): Sequest HT	XCorr (by Search Engine): Sequest HT	Top Apex RT [min]
FALSE	High	[M].AAAAAAAAAAGAAGGR.[G]	M	1xAcetyl [N-Term]	Q86U42 1xAcetyl [N-Term]	FALSE	0.000304413	0	1	1	6	Q86U42	Q86U42 [2-17]	0	1240.64	0	0.01	0.019	0.01	4.34403e-17	3.4125e-12	4.94188e-17	0	0	0	388.6	3.2	7.4	0.8		High	Peak Found	Peak Found	Peak Found	High	0	0.0001679	4.01	43.58
FALSE	High	[R].IDINMSGFNETDDLKR.[A]	R	1xAcetyl:2H(3) [K15]	P13797 1xAcetyl:2H(3) [K335]	FALSE	0.000669882	0	1	1	1	P13797	P13797 [321-336]	0	1912.91	0	0.636	0.032	1.481	0.971942	0.0631446	0.685974	0	0	0	127	80.8	4.1	188.1		Peak Found	Peak Found	Peak Found	High	High	0	1.9e-06	4.3	49.74
FALSE	High	[R].LDIDSPPITAR.[N]	R			FALSE	0.00623175	0	1	1	35	P14618	P14618 [33-43]	0	1197.65	0	0.916	0.594	1.261	0.957078	0.780772	0.638973	0	0	0	106.1	97.1	63	133.7		High	High	High	High	High	0	8.432e-05	3.77	36.4
FALSE	High	[R].SPQVPAAQQMLNFPEKNKEKPVDLQNFGLR.[T]	R	3xAcetyl:2H(3) [K16; K18; K20]; 1xAcetyl:2H(3) [N-Term]	Q92922 3xAcetyl:2H(3) [K588; K590; K592]; 1xAcetyl:2H(3) [N-Term]	FALSE	0.0161168	0	1	1	7	Q92922	Q92922 [573-602]	0	3603.9	0	0.406	0.01	1.495	0.803089	3.7678e-17	0.728542	0		0	137.9	55.9		206.1		Peak Found	High	Not Found	High	High	0	0.0004261	4.26	69.63
FALSE	High	[R].SPSDEYKDNLHQVSKR.[L]	R	2xAcetyl:2H(3) [K7; K15]; 1xAcetyl:2H(3) [N-Term]	Q9UKD2 2xAcetyl:2H(3) [K86; K94]; 1xAcetyl:2H(3) [N-Term]	FALSE	0.00294006	0	1	1	2	Q9UKD2	Q9UKD2 [80-95]	0	2038.02	0	100	100	100	4.34403e-17	3.7678e-17	4.94188e-17					136.1	197.4	66.6		Not Found	Peak Found	Peak Found	High	High	0	2.341e-05	3.87	33.76
FALSE	High	[R].SQAASILTKFQELKDVQDELR.[I]	R	2xAcetyl:2H(3) [K9; K14]; 1xAcetyl:2H(3) [N-Term]	O95347 2xAcetyl:2H(3) [K677; K682]; 1xAcetyl:2H(3) [N-Term]	FALSE	6.76401e-05	0	1	1	2	O95347	O95347 [669-689]	0	2554.37	0	0.01	0.01	0.289	4.34403e-17	3.7678e-17	0.372633			0	310.3			89.7		High	Not Found	Not Found	Peak Found	High	0	3.847e-08	4.38	83.38
FALSE	High	[R].LDHKFDLMYAKR.[A]	R	2xAcetyl:2H(3) [K4; K11]; 1xAcetyl:2H(3) [N-Term]	Q13748 2xAcetyl:2H(3) [K394; K401]; 1xAcetyl:2H(3) [N-Term]; A6NHL2 2xAcetyl:2H(3) [K401; K408]; 1xAcetyl:2H(3) [N-Term]; Q71U36 2xAcetyl:2H(3) [K394; K401]; 1xAcetyl:2H(3) [N-Term]; Q9NY65 2xAcetyl:2H(3) [K394; K401]; 1xAcetyl:2H(3) [N-Term]; P68363 2xAcetyl:2H(3) [K394; K401]; 1xAcetyl:2H(3) [N-Term]; Q9BQE3 2xAcetyl:2H(3) [K394; K401]; 1xAcetyl:2H(3) [N-Term]; P68366 2xAcetyl:2H(3) [K394; K401…	FALSE	0.00442704	0	2	7	5	Q13748; P68363	Q13748 [391-402]; A6NHL2 [398-409]; Q71U36 [391-402]; Q9NY65 [391-402]; P68363 [391-402]; Q9BQE3 [391-402]; P68366 [391-402]	0	1671.89	0	0.231	0.226	0.439	0.0455978	0.0350285	0.426428	0	0	0	211	48.6	47.7	92.7	Shared	High	High	Peak Found	Peak Found	High	0	9.809e-05	4.64	59.44
FALSE	High	[R].LDHKFDLMYAKR.[A]	R	2xAcetyl:2H(3) [K4; K11]	Q13748 2xAcetyl:2H(3) [K394; K401]; A6NHL2 2xAcetyl:2H(3) [K401; K408]; Q71U36 2xAcetyl:2H(3) [K394; K401]; Q9NY65 2xAcetyl:2H(3) [K394; K401]; P68363 2xAcetyl:2H(3) [K394; K401]; Q9BQE3 2xAcetyl:2H(3) [K394; K401]; P68366 2xAcetyl:2H(3) [K394; K401]	FALSE	0.0111212	0	2	7	7	Q13748; P68363	Q13748 [391-402]; A6NHL2 [398-409]; Q71U36 [391-402]; Q9NY65 [391-402]; P68363 [391-402]; Q9BQE3 [391-402]; P68366 [391-402]	0	1626.86	0	3.369	5.525	2.088	0.0211468	0.00116692	0.110806	0	0	0	33.4	112.5	184.4	69.7	Shared	High	High	High	High	High	0	0.0007897	4.31	43.7
FALSE	High	[R].LDGLVETPTGYIESLPR.[V]	R			FALSE	0.00623175	0	1	1	1	P55209	P55209 [56-72]	0	1859.97	0	9.792	11.589	6.351	0.00568468	0.0960597	0.0412641	0	0	0	13.9	136.3	161.3	88.4		Peak Found	Peak Found	High	Peak Found	High	0	8.476e-05	4.46	53.97
FALSE	High	[R].LDGKVIILTAAAQGIGQAAALAFAR.[E]	R	1xAcetyl:2H(3) [K4]	Q9BUT1 1xAcetyl:2H(3) [K7]	FALSE	0.00342523	0	1	1	3	Q9BUT1	Q9BUT1 [4-28]	0	2484.44	0	0.01	0.449	0.423	4.34403e-17	0.954008	0.758555		0	0	213.7		95.9	90.4		High	Not Found	Peak Found	Peak Found	High	0	3.052e-05	3.58	93.58
FALSE	High	[E].LDFISAVEKSR.[K]	E	1xAcetyl:2H(3) [K9]; 1xAcetyl:2H(3) [N-Term]	P35237 1xAcetyl:2H(3) [K129]; 1xAcetyl:2H(3) [N-Term]	FALSE	0.0168169	0	1	1	13	P35237	P35237 [121-131]	0	1354.75	0	61.42	52.384	51.383	3.48344e-07	0.00518982	4.26583e-08	0	0	0	2.4	147.8	126.1	123.7		Peak Found	High	High	Peak Found	High	0	0.0004597	3.47	71.79
FALSE	High	[M].SQAEFEKAAEEVR.[H]	M	1xAcetyl [N-Term]; 1xAcetyl:2H(3) [K7]	P07108 1xAcetyl [N-Term]; 1xAcetyl:2H(3) [K8]	FALSE	0.00111264	0	1	1	16	P07108	P07108 [2-14]	0	1580.76	0	0.234	0.234	0.303	0.0690752	0.0521937	0.136525	0	0	0	225.9	52.8	52.8	68.5		High	High	High	High	High	0	4.484e-06	2.63	48.59
FALSE	High	[R].LDDLVSTGKLNLSQVR.[F]	R	1xAcetyl:2H(3) [K9]	Q92499 1xAcetyl:2H(3) [K358]	FALSE	0.000391143	0	1	1	2	Q92499	Q92499 [350-365]	0	1803	0	0.979	0.068	1.829	0.905375	0.166923	0.492822	0	0	0	103.2	101	7	188.8		High	Peak Found	Peak Found	High	High	0	7.581e-07	4.59	51.17
FALSE	High	[R].IDDIVSGHKKKGDDQSR.[Q]	R	3xAcetyl:2H(3) [K9; K10; K11]; 1xAcetyl:2H(3) [N-Term]	P49368 3xAcetyl:2H(3) [K527; K528; K529]; 1xAcetyl:2H(3) [N-Term]	FALSE	0.0059711	0	1	1	5	P49368	P49368 [519-535]	0	2078.09	0	1.075	0.807	2.909	0.863594	0.973173	0.155205	0	0	0	69.1	74.3	55.8	200.9		Peak Found	Peak Found	High	High	High	0	0.0001495	4.52	27.98
FALSE	High	[R].IDDIVSGHKKKGDDQSR.[Q]	R	3xAcetyl:2H(3) [K9; K10; K11]	P49368 3xAcetyl:2H(3) [K527; K528; K529]	FALSE	0.00355311	0	1	1	2	P49368	P49368 [519-535]	0	2033.06	0	0.087	0.06	0.234	0.00578844	0.00461148	0.109595	0	0	0	289.7	25.1	17.5	67.7		High	Peak Found	Peak Found	High	High	0	3.234e-05	3.4	26.37
FALSE	High	[R].SQEGRPVQVIGALIGKQEGR.[N]	R	1xAcetyl:2H(3) [K16]; 1xAcetyl:2H(3) [N-Term]	Q7L5N1 1xAcetyl:2H(3) [K75]; 1xAcetyl:2H(3) [N-Term]	FALSE	0.00295808	0	1	1	10	Q7L5N1	Q7L5N1 [60-79]	0	2212.23	0	3.396	4.309	4.111	0.152981	0.333613	0.151841	0	0	0	31.2	106	134.5	128.3		Peak Found	High	High	High	High	0	5.522e-05	5.51	57.66
FALSE	High	[E].LDALDANDELTPLGR.[I]	E	1xAcetyl:2H(3) [N-Term]	Q08211 1xAcetyl:2H(3) [N-Term]	FALSE	0.0109199	0	1	1	25	Q08211	Q08211 [839-853]	0	1657.85	0	100	100	100	4.34403e-17	3.7678e-17	4.94188e-17					116.3	136.8	146.9		Not Found	High	Peak Found	High	High	0	0.001204	2.14	61.41
FALSE	High	[E].LAVVIGKKGKHIKATDAMAHVAGFTVAHDVSAR.[D]	E	4xAcetyl:2H(3) [K7; K8; K10; K13]; 1xAcetyl:2H(3) [N-Term]	Q96GK7 4xAcetyl:2H(3) [K168; K169; K171; K174]; 1xAcetyl:2H(3) [N-Term]; Q6P2I3 4xAcetyl:2H(3) [K168; K169; K171; K174]; 1xAcetyl:2H(3) [N-Term]	FALSE	4.22779e-07	0	1	2	1	Q6P2I3	Q96GK7 [162-194]; Q6P2I3 [162-194]	0	3624.03	0		100	100		3.7678e-17	4.94188e-17						100.6	299.4		Not Found	Not Found	High	Peak Found	High	0	6.855e-12	6.72	69.74
FALSE	High	[E].SQKVMDEVEKAR.[A]	E	2xAcetyl:2H(3) [K3; K10]; 1xAcetyl:2H(3) [N-Term]	Q9Y383 2xAcetyl:2H(3) [K154; K161]; 1xAcetyl:2H(3) [N-Term]	FALSE	0.0131074	0	1	1	7	Q9Y383	Q9Y383 [152-163]	0	1554.81	0	100	100	100	4.34403e-17	3.7678e-17	4.94188e-17					174.7	187.7	37.7		Not Found	Peak Found	High	Peak Found	High	0	0.0002991	2.21	48.98
FALSE	High	[E].IATKEPMNPIKQYVKDGKLR.[Y]	E	4xAcetyl:2H(3) [K4; K11; K15; K18]; 1xAcetyl:2H(3) [N-Term]	Q9H2U2 4xAcetyl:2H(3) [K111; K118; K122; K125]; 1xAcetyl:2H(3) [N-Term]	FALSE	0.00426773	0	1	1	2	Q9H2U2	Q9H2U2 [108-127]	0	2554.45	0	100	100	100	4.34403e-17	3.7678e-17	4.94188e-17					194.5	157	48.5		Not Found	High	Peak Found	Peak Found	High	0	4.432e-05	3.17	68.17
FALSE	High	[E].IATKDPLNPIKQDVKKGKLR.[Y]	E	5xAcetyl:2H(3) [K4; K11; K15; K16; K18]; 1xAcetyl:2H(3) [N-Term]	Q15181 5xAcetyl:2H(3) [K63; K70; K74; K75; K77]; 1xAcetyl:2H(3) [N-Term]	FALSE	0.000232606	0	1	1	23	Q15181	Q15181 [60-79]	0	2532.54	0	26.346	26.692	13.829	2.4792e-10	2.47477e-10	4.61143e-09	0	0	0	5.9	155.3	157.3	81.5		Peak Found	High	High	High	High	0	4.65e-06	4.25	67.28
FALSE	High	[E].LATFQMKPGGPALWGDAFKR.[A]	E	2xAcetyl:2H(3) [K7; K19]; 1xAcetyl:2H(3) [N-Term]	Q9UFN0 2xAcetyl:2H(3) [K154; K166]; 1xAcetyl:2H(3) [N-Term]	FALSE	1.19133e-05	0	1	1	15	Q9UFN0	Q9UFN0 [148-167]	0	2326.24	0	5.349	30.63	41.989	0.0505059	0.00159484	7.13247e-10	0	0	0	5.1	27.1	155.2	212.7		Peak Found	High	High	Peak Found	High	0	2.008e-09	4.98	76.59
FALSE	High	[R].LATALQKLEEAEKAADESER.[G]	R	2xAcetyl:2H(3) [K7; K13]	P67936 2xAcetyl:2H(3) [K76; K82]; P09493 2xAcetyl:2H(3) [K112; K118]; P07951 2xAcetyl:2H(3) [K112; K118]; P06753 2xAcetyl:2H(3) [K113; K119]	FALSE	0.00210089	0	3	4	4	P67936; P07951; P06753	P67936 [70-89]; P09493 [106-125]; P07951 [106-125]; P06753 [107-126]	0	2292.18	0	0.024	0.109	0.01	7.9459e-05	0.115438	4.94188e-17	0	0		353	8.5	38.5		Shared	High	Peak Found	Peak Found	Not Found	High	0	0.0001525	5.74	60.03
FALSE	High	[E].IASVLTSQKPSVLLTLR.[G]	E	1xAcetyl:2H(3) [K9]; 1xAcetyl:2H(3) [N-Term]	P12955 1xAcetyl:2H(3) [K140]; 1xAcetyl:2H(3) [N-Term]	FALSE	0.000544155	0	1	1	20	P12955	P12955 [132-148]	0	1916.17	0	15.845	27.453	33.921	0.000471067	6.92585e-05	1.04149e-11	0	0	0	5.1	81	140.4	173.5		Peak Found	High	High	High	High	0	4.747e-05	4.75	77.08
FALSE	High	[R].SPPIPLAKVDATAETDLAKR.[F]	R	2xAcetyl:2H(3) [K8; K19]; 1xAcetyl:2H(3) [N-Term]	P13667 2xAcetyl:2H(3) [K234; K245]; 1xAcetyl:2H(3) [N-Term]	FALSE	0.00437329	0	1	1	2	P13667	P13667 [227-246]	0	2228.25	0	0.486	0.01	1.108	0.87306	3.7678e-17	0.877177	0		0	154.2	74.9		170.9		High	High	Not Found	Peak Found	High	0	4.642e-05	4	64.32
FALSE	High	[E].LASPSLLFIFVR.[H]	E	1xAcetyl:2H(3) [N-Term]	Q04637 1xAcetyl:2H(3) [N-Term]	FALSE	0.0153522	0	1	1	5	Q04637	Q04637 [1269-1280]	0	1407.84	0	100			4.34403e-17							400				Not Found	High	Not Found	High	High	0	0.0007117	3.93	91.39
FALSE	High	[R].SPLVAAMQHFLPVLKDR.[F]	R	1xAcetyl:2H(3) [K15]; 1xAcetyl:2H(3) [N-Term]	O95373 1xAcetyl:2H(3) [K182]; 1xAcetyl:2H(3) [N-Term]	FALSE	0.000188944	0	1	1	12	O95373	O95373 [168-184]	0	2012.13	0	0.054	0.01	1.251	0.00825666	3.7678e-17	0.834597	0		0	173.6	9.3		217.1		High	High	Not Found	Peak Found	High	0	2.19e-07	5.46	88.5
FALSE	High	[E].IDRLNEQASEEILKVEQKYNKLR.[Q]	E	3xAcetyl:2H(3) [K14; K18; K21]; 1xAcetyl:2H(3) [N-Term]	Q01105 3xAcetyl:2H(3) [K68; K72; K75]; 1xAcetyl:2H(3) [N-Term]	FALSE	0.00206273	0	1	1	7	Q01105	Q01105 [55-77]	1	2996.64	0	12.034	34.888	9.516	0.00320256	0.00061227	0.0142155	0	0	0	7	83.8	243	66.3		Peak Found	High	High	High	High	0	5.274e-05	5.26	74.57
FALSE	High	[R].LENDGATALAEAFR.[V]	R			FALSE	0.0163138	0	1	1	2	P46060	P46060 [192-205]	0	1477.73	0	100	100	100	4.34403e-17	3.7678e-17	4.94188e-17					127.4	141.5	131.2		Not Found	Peak Found	Peak Found	High	High	0	0.0004355	3.92	46.9
FALSE	High	[E].LEIIEGMKFDR.[G]	E	1xAcetyl:2H(3) [K8]; 1xAcetyl:2H(3) [N-Term]	P10809 1xAcetyl:2H(3) [K218]; 1xAcetyl:2H(3) [N-Term]	FALSE	0.0152592	0	1	1	6	P10809	P10809 [211-221]	0	1440.77	0	29.4	13.707	14.709	1.68769e-06	0.0807258	0.000450191	0	0	0	6.8	199.9	93.2	100		Peak Found	High	Peak Found	High	High	6.911e-05	0.001834	3.57	80.22
FALSE	High	[E].IELIAIATGGR.[I]	E	1xAcetyl:2H(3) [N-Term]	P48643 1xAcetyl:2H(3) [N-Term]	FALSE	0.0220957	0	1	1	13	P48643	P48643 [330-340]	0	1158.69	0	24.354	25.48	23.664	0.000144866	0.0146546	0.000655404	0	0	0	5.4	130.8	136.8	127.1		Peak Found	High	High	Peak Found	High	0.0002176	0.005895	2.8	81.79
FALSE	High	[E].LELKAEKDNAEIR.[V]	E	2xAcetyl:2H(3) [K4; K7]; 1xAcetyl:2H(3) [N-Term]	Q99832 2xAcetyl:2H(3) [K247; K250]; 1xAcetyl:2H(3) [N-Term]	FALSE	0.00169633	0	1	1	10	Q99832	Q99832 [244-256]	0	1663.92	0	21.813	22.484	19.129	2.37088e-09	1.71891e-07	4.11351e-09	0	0	0	6.2	135.4	139.6	118.8		Peak Found	High	High	High	High	0	0.0001148	4.62	51.78
FALSE	High	[E].IEHAEKEKMKEKVER.[I]	E	4xAcetyl:2H(3) [K6; K8; K10; K12]; 1xAcetyl:2H(3) [N-Term]	P78371 4xAcetyl:2H(3) [K272; K274; K276; K278]; 1xAcetyl:2H(3) [N-Term]	FALSE	4.86189e-05	0	1	1	10	P78371	P78371 [267-281]	0	2109.15	0	33.439	27.144	19.408	1.15851e-11	2.00807e-10	4.03623e-11	0	0	0	4.9	165.1	134.1	95.9		Peak Found	High	High	High	High	0	1.409e-07	6.74	50.15
FALSE	High	[R].IEGDPQGVQQAKR.[E]	R	1xAcetyl:2H(3) [K12]	Q00341 1xAcetyl:2H(3) [K494]	FALSE	0.0066239	0	1	1	2	Q00341	Q00341 [483-495]	0	1470.77	0	0.671	0.324	0.93	0.976309	0.699148	0.963108	0	0	0	136.8	91.7	44.4	127.2		Peak Found	High	Peak Found	High	High	0	0.001042	3.97	20.78
FALSE	High	[E].SNWNEIVDSFDDMNLSESLLR.[G]	E	1xAcetyl:2H(3) [N-Term]	P60842 1xAcetyl:2H(3) [N-Term]	FALSE	0.000241298	0	1	1	8	P60842	P60842 [25-45]	0	2529.16	0	11.425	16.598	17.156	0.000695206	0.000529032	8.22087e-07	0	0	0	8.7	99	143.8	148.6		Peak Found	High	High	High	High	0	3.353e-07	4.55	84.44
FALSE	High	[E].LEFLSMANVELSSLAR.[L]	E	1xAcetyl:2H(3) [N-Term]	Q9BTT0 1xAcetyl:2H(3) [N-Term]	FALSE	0.000245765	0	1	1	8	Q9BTT0	Q9BTT0 [44-59]	0	1824.96	0	16.332	10.258	9.939	0.000613813	0.112988	0.0103103	0	0	0	10.7	174.1	109.3	105.9		Peak Found	High	High	Peak Found	High	0	9.163e-06	4.13	97.79
FALSE	High	[E].LEEQDSTQATTQQAQLAAAAEIDEEPVSKAKQSR.[S]	E	2xAcetyl:2H(3) [K29; K31]; 1xAcetyl:2H(3) [N-Term]	Q13765 2xAcetyl:2H(3) [K66; K68]; 1xAcetyl:2H(3) [N-Term]; E9PAV3 2xAcetyl:2H(3) [K1929; K1931]; 1xAcetyl:2H(3) [N-Term]	FALSE	0.0014471	0	1	2	4	E9PAV3	Q13765 [38-71]; E9PAV3 [1901-1934]	0	3806.89	0	100	100	100	4.34403e-17	3.7678e-17	4.94188e-17					148.2	167	84.7		Not Found	Peak Found	High	High	High	0	0.0002192	4.74	53.08
FALSE	High	[E].SNWNEIVDSFDDMNLSESLLR.[G]	E	1xOxidation [M13]; 1xAcetyl:2H(3) [N-Term]	P60842 1xOxidation [M37]; 1xAcetyl:2H(3) [N-Term]	FALSE	0.00355311	0	1	1	5	P60842	P60842 [25-45]	0	2545.16	0	100	100	100	4.34403e-17	3.7678e-17	4.94188e-17					40.8	134.4	224.7		Not Found	High	Peak Found	High	High	0	3.238e-05	2.9	77.33
FALSE	High	[E].LEEGKAGSGLR.[Q]	E	1xAcetyl:2H(3) [K5]; 1xAcetyl:2H(3) [N-Term]	P62195 1xAcetyl:2H(3) [K15]; 1xAcetyl:2H(3) [N-Term]	FALSE	0.0304487	0	1	1	4	P62195	P62195 [11-21]	0	1206.66	0	6.251	8.288	2.986	0.0242834	0.047509	0.288211	0	0	0	21.6	135	179	64.5		Peak Found	High	Peak Found	High	High	0	0.001279	2.88	35.09
FALSE	High	[R].IEEELGSKAKFAGR.[N]	R	2xAcetyl:2H(3) [K8; K10]	P06733 2xAcetyl:2H(3) [K420; K422]	FALSE	0.000524556	0	1	1	111	P06733	P06733 [413-426]	0	1624.88	0	0.99	1.126	1.295	0.915733	0.831715	0.605965	0	0	0	90.7	89.8	102.1	117.4		High	High	High	High	High	0	1.252e-06	5.13	36.83
FALSE	High	[R].IEDVTPIPSDSTR.[R]	R			FALSE	0.00244765	0	1	1	2	P62263	P62263 [129-141]	0	1429.72	0	0.79	0.697	0.789	0.98632	0.917765	0.993902	0	0	0	122.1	96.4	85.1	96.4		Peak Found	Peak Found	High	High	High	0	2.79e-05	3.39	29.48
FALSE	High	[E].LEALIQNLDNVVEDSMLVDPKHHR.[H]	E	1xOxidation [M16]; 1xAcetyl:2H(3) [K21]; 1xAcetyl:2H(3) [N-Term]	Q00341 1xOxidation [M805]; 1xAcetyl:2H(3) [K810]; 1xAcetyl:2H(3) [N-Term]	FALSE	0.00344622	0	1	1	4	Q00341	Q00341 [790-813]	0	2891.48	0			100			4.94188e-17							400		Not Found	Not Found	Not Found	High	High	0	3.074e-05	2.69	92.48
FALSE	High	[R].SPAIAAVGPIKQLPDFKQIR.[S]	R	2xAcetyl:2H(3) [K11; K17]; 1xAcetyl:2H(3) [N-Term]	O75439 2xAcetyl:2H(3) [K472; K478]; 1xAcetyl:2H(3) [N-Term]	FALSE	0.00320261	0	1	1	8	O75439	O75439 [462-481]	0	2284.34	0	0.705	0.643	0.932	0.989475	0.955793	0.950696	0	0	0	121.9	86	78.4	113.6		Peak Found	High	High	High	High	0	2.724e-05	3.89	67.4
FALSE	High	[R].SPKLFYADHPFIFLVR.[D]	R	1xAcetyl:2H(3) [K3]; 1xAcetyl:2H(3) [N-Term]	P50454 1xAcetyl:2H(3) [K380]; 1xAcetyl:2H(3) [N-Term]	FALSE	0.000931895	0	1	1	1	P50454	P50454 [378-393]	0	2040.12	0	0.394	0.525	0.396	0.780532	0.956392	0.74578	0	0	0	172.8	68	90.7	68.5		High	Peak Found	Peak Found	Peak Found	High	0	3.313e-06	4.85	74.47
FALSE	High	[E].LDTVVKTQHEILR.[Q]	E	1xAcetyl:2H(3) [K6]; 1xAcetyl:2H(3) [N-Term]	P49257 1xAcetyl:2H(3) [K394]; 1xAcetyl:2H(3) [N-Term]	FALSE	0.0027658	0	1	1	1	P49257	P49257 [389-401]	0	1641.94	0	39.164	20.97	32.92	3.22837e-06	0.0236239	6.50322e-07	0	0	0	4.3	166.6	89.2	140		Peak Found	High	Peak Found	Peak Found	High	0	2.128e-05	4.41	54.21
FALSE	High	[E].LDTLSEESYKDSTLIMQLLR.[D]	E	1xOxidation [M16]; 1xAcetyl:2H(3) [K10]; 1xAcetyl:2H(3) [N-Term]	P63104 1xOxidation [M218]; 1xAcetyl:2H(3) [K212]; 1xAcetyl:2H(3) [N-Term]; P62258 1xOxidation [M221]; 1xAcetyl:2H(3) [K215]; 1xAcetyl:2H(3) [N-Term]	FALSE	0.000415805	0	2	2	20	P63104; P62258	P63104 [203-222]; P62258 [206-225]	0	2461.26	0	11.232	18.659	27.344	0.00714388	0.0448749	0.000172446	0	0	0	6.9	77.1	128.2	187.8	Shared	Peak Found	High	High	High	High	0	2.126e-06	4.92	87.66
FALSE	High	[E].LDTLSEESYKDSTLIMQLLR.[D]	E	1xAcetyl:2H(3) [K10]; 1xAcetyl:2H(3) [N-Term]	P63104 1xAcetyl:2H(3) [K212]; 1xAcetyl:2H(3) [N-Term]; P62258 1xAcetyl:2H(3) [K215]; 1xAcetyl:2H(3) [N-Term]	FALSE	4.24995e-05	0	2	2	24	P63104; P62258	P63104 [203-222]; P62258 [206-225]	0	2445.27	0	16.756	32.077	69.403	0.000505634	0.000977309	4.94188e-17	0	0	0	3.4	56.2	107.6	232.8	Shared	High	High	High	High	High	0	1.739e-08	5.18	94.1
FALSE	High	[E].LDTLNEDSYKDSTLIMQLLR.[D]	E	1xAcetyl:2H(3) [K10]; 1xAcetyl:2H(3) [N-Term]	Q04917 1xAcetyl:2H(3) [K217]; 1xAcetyl:2H(3) [N-Term]; P61981 1xAcetyl:2H(3) [K217]; 1xAcetyl:2H(3) [N-Term]; P27348 1xAcetyl:2H(3) [K212]; 1xAcetyl:2H(3) [N-Term]	FALSE	0.00121948	0	3	3	5	Q04917; P61981; P27348	Q04917 [208-227]; P61981 [208-227]; P27348 [203-222]	0	2458.27	0	0.01	17.488	25.281	4.34403e-17	0.0308073	3.65561e-05		0	0	9.1		159.8	231	Shared	Peak Found	Not Found	High	High	High	0	5.267e-06	4.33	88.08
FALSE	High	[E].LDTLAAETAATLTTKHPDYAILAAR.[I]	E	1xAcetyl:2H(3) [K15]; 1xAcetyl:2H(3) [N-Term]	P23921 1xAcetyl:2H(3) [K70]; 1xAcetyl:2H(3) [N-Term]	FALSE	0.0173353	0	1	1	1	P23921	P23921 [56-80]	0	2717.46	0	100		100	4.34403e-17		4.94188e-17					66.1		333.9		Not Found	High	Not Found	Peak Found	High	0	0.0004863	3.36	76.87
FALSE	High	[E].LDSNNEKGLFR.[R]	E	1xAcetyl:2H(3) [K7]; 1xAcetyl:2H(3) [N-Term]	Q02790 1xAcetyl:2H(3) [K354]; 1xAcetyl:2H(3) [N-Term]	FALSE	0.0266579	0	1	1	5	Q02790	Q02790 [348-358]	0	1382.72	0	38.851	23.32	22.954	6.13847e-08	0.00973208	8.95385e-06	0	0	0	4.6	180.4	108.3	106.6		Peak Found	High	High	High	High	0.0001346	0.002413	3.25	50.24
FALSE	High	[E].LDSLMTDETIANVPILILGNKIDRPEAISEER.[L]	E	1xAcetyl:2H(3) [K21]; 1xAcetyl:2H(3) [N-Term]	Q9Y6B6 1xAcetyl:2H(3) [K135]; 1xAcetyl:2H(3) [N-Term]	FALSE	0.000743249	0	1	1	4	Q9Y6B6	Q9Y6B6 [115-146]	0	3655.94	0		100	100		3.7678e-17	4.94188e-17						144.1	255.9		Not Found	Not Found	High	High	High	0	2.262e-06	4.07	88.25
FALSE	High	[R].LDQPMTEIVSR.[V]	R			FALSE	0.0227754	0	1	1	5	P22314	P22314 [1011-1021]	0	1288.66	0	0.581	0.219	1.238	0.802121	0.0663728	0.661829	0	0	0	131.7	76.5	28.9	163		High	Peak Found	High	High	High	0.0002176	0.004264	3.59	36.18
FALSE	High	[E].IAQVATISANGDKEIGNIISDAMKKVGR.[K]	E	3xAcetyl:2H(3) [K13; K24; K25]; 1xAcetyl:2H(3) [N-Term]	P10809 3xAcetyl:2H(3) [K180; K191; K192]; 1xAcetyl:2H(3) [N-Term]	FALSE	0.000220151	0	1	1	18	P10809	P10809 [168-195]	0	3079.68	0	17.684	18.314	16.806	2.68188e-06	5.11912e-05	1.91079e-07	0	0	0	7.4	131.5	136.2	124.9		High	High	High	High	High	0	1.094e-06	5.64	96.35
FALSE	High	[E].LAPYDENWFYTR.[A]	E	1xAcetyl:2H(3) [N-Term]	P39019 1xAcetyl:2H(3) [N-Term]	FALSE	0.0154457	0	1	1	23	P39019	P39019 [45-56]	0	1619.76	0	100	100	100	4.34403e-17	3.7678e-17	4.94188e-17					153.7	107.8	138.5		Not Found	High	High	High	High	0	0.0009449	2.17	64.96
FALSE	High	[E].LAPSKLEEEVDDVFLIR.[A]	E	1xAcetyl:2H(3) [K5]; 1xAcetyl:2H(3) [N-Term]	Q12849 1xAcetyl:2H(3) [K141]; 1xAcetyl:2H(3) [N-Term]	FALSE	0.000524556	0	1	1	19	Q12849	Q12849 [137-153]	0	2063.12	0	9.705	16.805	14.577	0.00954736	0.0273393	0.000268066	0	0	0	9.5	92.2	159.7	138.5		Peak Found	High	High	High	High	0	0.0012	3.71	88.29
FALSE	High	[R].LAADVGKSGTER.[E]	R	1xAcetyl:2H(3) [K7]	P12236 1xAcetyl:2H(3) [K147]	FALSE	0.00150116	0	1	1	2	P12236	P12236 [141-152]	0	1248.66	0	1.316	2.656	0.746	0.774076	0.550269	0.991092	0	0	0	69.9	92	185.8	52.2		Peak Found	Peak Found	Peak Found	High	High	0	7.5e-06	3.78	19.37
FALSE	High	[R].LAADVGKAGAER.[E]	R	1xAcetyl:2H(3) [K7]	P05141 1xAcetyl:2H(3) [K147]	FALSE	0.00163526	0	1	1	9	P05141	P05141 [141-152]	0	1202.66	0	0.107	0.159	0.718	0.00327775	0.0208811	0.96151	0	0	0	201.7	21.6	32	144.7		High	Peak Found	Peak Found	High	High	0	8.667e-06	4.31	22.29
FALSE	High	[E].KYLIATSEQPIAALHR.[D]	E	1xAcetyl:2H(3) [K1]; 1xAcetyl:2H(3) [N-Term]	P49591 1xAcetyl:2H(3) [K266]; 1xAcetyl:2H(3) [N-Term]	FALSE	0.000423502	0	1	1	2	P49591	P49591 [266-281]	0	1901.08	0	100	100	100	4.34403e-17	3.7678e-17	4.94188e-17					165.3	180.3	54.4		Not Found	Peak Found	Peak Found	High	High	0	8.674e-07	4.95	57.6
FALSE	High	[R].KVQSGNINAAKTIADIIR.[T]	R	2xAcetyl:2H(3) [K1; K11]; 1xAcetyl:2H(3) [N-Term]	P49368 2xAcetyl:2H(3) [K21; K31]; 1xAcetyl:2H(3) [N-Term]	FALSE	0.0125609	0	1	1	1	P49368	P49368 [21-38]	0	2047.19	0	0.656	0.01	0.589	0.993064	3.7678e-17	0.918656	0		0	178.2	116.8		105		High	Peak Found	Not Found	Peak Found	High	0	0.0002784	3.77	67.27
FALSE	High	[R].KVLGEKGKNIKIISKIENHEGVR.[R]	R	5xAcetyl:2H(3) [K1; K6; K8; K11; K15]	P14618 5xAcetyl:2H(3) [K256; K261; K263; K266; K270]	FALSE	2.58992e-05	0	1	1	2	P14618	P14618 [256-278]	0	2814.67	0	0.252	0.01	1.965	0.46567	3.7678e-17	0.535639	0		0	124.3	31.4		244.3		Peak Found	Peak Found	Not Found	High	High	0	1.711e-08	5.04	55.96
FALSE	High	[E].KVLAGETLSVNDPPDVLDR.[Q]	E	1xAcetyl:2H(3) [K1]; 1xAcetyl:2H(3) [N-Term]	Q12906 1xAcetyl:2H(3) [K182]; 1xAcetyl:2H(3) [N-Term]	FALSE	0.0225011	0	1	1	1	Q12906	Q12906 [182-200]	0	2128.14	0	100	100	100	4.34403e-17	3.7678e-17	4.94188e-17					109.7	169.9	120.4		Not Found	Peak Found	Peak Found	High	High	0	0.0007617	2.62	59.18
FALSE	High	[L].KVGGTSDVEVNEKKDR.[V]	L	3xAcetyl:2H(3) [K1; K13; K14]; 1xAcetyl:2H(3) [N-Term]	P10809 3xAcetyl:2H(3) [K405; K417; K418]; 1xAcetyl:2H(3) [N-Term]	FALSE	0.000241298	0	1	1	4	P10809	P10809 [405-420]	0	1941.03	0	0.679	0.37	0.996	0.994056	0.874276	0.960825	0	0	0	131.4	89.1	48.7	130.8		High	High	Peak Found	Peak Found	High	0	7.715e-07	5.45	34.28
FALSE	High	[R].KTVTAMDVVYALKR.[Q]	R	2xAcetyl:2H(3) [K1; K13]; 1xAcetyl:2H(3) [N-Term]	P62805 2xAcetyl:2H(3) [K80; K92]; 1xAcetyl:2H(3) [N-Term]	FALSE	0.00022286	0	1	1	12	P62805	P62805 [80-93]	0	1729.99	0	0.583	0.938	0.775	0.803089	0.955793	0.987852	0	0	0	121.4	70.7	113.8	94.1		High	High	High	High	High	0	4.782e-07	4.93	72.87
FALSE	High	[R].KTVTAMDVVYALKR.[Q]	R	2xAcetyl:2H(3) [K1; K13]	P62805 2xAcetyl:2H(3) [K80; K92]	FALSE	0.000254949	0	1	1	10	P62805	P62805 [80-93]	0	1684.96	0	0.48	1.042	0.723	0.73024	0.891581	0.965626	0	0	0	123.3	59.1	128.4	89.1		High	High	High	High	High	0	9.866e-06	4.94	62.63
FALSE	High	[E].KTLLEEKVKLEEQLKETVEKYKR.[A]	E	6xAcetyl:2H(3) [K1; K7; K9; K15; K20; K22]; 1xAcetyl:2H(3) [N-Term]	Q9HAV7 6xAcetyl:2H(3) [K58; K64; K66; K72; K77; K79]; 1xAcetyl:2H(3) [N-Term]	FALSE	0.000271025	0	1	1	13	Q9HAV7	Q9HAV7 [58-80]	0	3176.84	0	100	100	100	4.34403e-17	3.7678e-17	4.94188e-17					80.7	95.3	224.1		Not Found	Peak Found	High	High	High	0	8.821e-07	5.21	97.46
FALSE	High	[R].KTKEDEKDDKPIR.[A]	R	4xAcetyl:2H(3) [K1; K3; K7; K10]	P35998 4xAcetyl:2H(3) [K11; K13; K17; K20]	FALSE	0.00260187	0	1	1	2	P35998	P35998 [11-23]	0	1781.97	0	0.464	0.401	1.764	0.930218	0.928986	0.628113	0	0	0	110.2	51.1	44.2	194.4		High	Peak Found	Peak Found	High	High	0	6.491e-05	4.81	27
FALSE	High	[R].KSSTQEEIKKR.[K]	R	3xAcetyl:2H(3) [K1; K9; K10]	Q9Y281 3xAcetyl:2H(3) [K22; K30; K31]	FALSE	0.0219622	0	1	1	7	Q9Y281	Q9Y281 [22-32]	0	1468.83	0	0.01	0.01	0.01	4.34403e-17	3.7678e-17	4.94188e-17				400					High	High	Not Found	High	High	0	0.0007243	3.19	21.45
FALSE	High	[R].SSDFAKIINNTENLVR.[E]	R	1xAcetyl:2H(3) [K6]; 1xAcetyl:2H(3) [N-Term]	Q9Y617 1xAcetyl:2H(3) [K51]; 1xAcetyl:2H(3) [N-Term]	FALSE	0.00151962	0	1	1	20	Q9Y617	Q9Y617 [46-61]	0	1911.01	0	0.869	1.065	0.93	0.976309	0.876873	0.939903	0	0	0	103.5	90	110.3	96.3		High	High	High	High	High	0	0.0002885	5.11	74.8
FALSE	High	[R].KSLSDSESDDSKSKKKR.[D]	R	5xAcetyl:2H(3) [K1; K12; K14; K15; K16]	Q13185 5xAcetyl:2H(3) [K92; K103; K105; K106; K107]	FALSE	0.000150688	0	1	1	1	Q13185	Q13185 [92-108]	0	2150.14	0	0.31	0.352	0.596	0.633666	0.856034	0.932191	0	0	0	177.1	54.9	62.4	105.6		High	Peak Found	Peak Found	Peak Found	High	0	1.502e-07	4.47	25.31
FALSE	High	[E].KSLIVEGKR.[E]	E	2xAcetyl:2H(3) [K1; K8]; 1xAcetyl:2H(3) [N-Term]	P35659 2xAcetyl:2H(3) [K50; K57]; 1xAcetyl:2H(3) [N-Term]	FALSE	0.0206704	0	1	1	11	P35659	P35659 [50-58]	0	1164.73	0	100	100	100	4.34403e-17	3.7678e-17	4.94188e-17	0	0	0	0.5	185.6	94	119.9		Peak Found	High	High	High	High	0	0.0006533	3.73	43.36
FALSE	High	[A].SSEAPPLINEDVKR.[T]	A	1xAcetyl:2H(3) [K13]; 1xAcetyl:2H(3) [N-Term]	P04843 1xAcetyl:2H(3) [K37]; 1xAcetyl:2H(3) [N-Term]	FALSE	0.0143593	0	1	1	5	P04843	P04843 [25-38]	0	1644.87	0	0.01	0.01	0.075	4.34403e-17	3.7678e-17	0.018197			0	372.3			27.7		High	Not Found	Not Found	High	High	0.0001879	0.003095	1.93	42.64
FALSE	High	[M].SSEPPPPPQPPTHQASVGLLDTPR.[S]	M	1xAcetyl [N-Term]	Q9Y2V2 1xAcetyl [N-Term]	FALSE	0.00984574	0	1	1	1	Q9Y2V2	Q9Y2V2 [2-25]	0	2547.28	0	0.01	0.363	0.756	4.34403e-17	0.899908	0.987852		0	0	188.7		68.5	142.7		High	Not Found	Peak Found	Peak Found	High	0	0.0001835	3.14	39.9
FALSE	High	[R].KQLAQIKEMVELPLR.[H]	R	2xAcetyl:2H(3) [K1; K7]; 1xAcetyl:2H(3) [N-Term]	P55072 2xAcetyl:2H(3) [K211; K217]; 1xAcetyl:2H(3) [N-Term]	FALSE	0.00223327	0	1	1	2	P55072	P55072 [211-225]	0	1931.13	0	0.01	0.01	0.01	4.34403e-17	3.7678e-17	4.94188e-17				400					High	Not Found	Not Found	Not Found	High	0	1.47e-05	4.52	82.22
FALSE	High	[R].SSGPYGGGGQYFAKPR.[N]	R	1xAcetyl:2H(3) [K14]; 1xAcetyl:2H(3) [N-Term]	P09651 1xAcetyl:2H(3) [K350]; 1xAcetyl:2H(3) [N-Term]	FALSE	0.00506365	0	1	1	31	P09651	P09651 [337-352]	0	1718.84	0	0.598	0.641	0.484	0.82476	0.854914	0.560034	0	0	0	146.9	87.9	94.1	71.1		High	High	High	High	High	0	5.919e-05	4.84	40.39
FALSE	High	[R].KPLVIIAEDVDGEALSTLVLNR.[L]	R	1xAcetyl:2H(3) [K1]; 1xAcetyl:2H(3) [N-Term]	P10809 1xAcetyl:2H(3) [K269]; 1xAcetyl:2H(3) [N-Term]	FALSE	0.00462041	0	1	1	3	P10809	P10809 [269-290]	0	2455.39	0	0.655	0.229	0.981	0.989475	0.722811	0.956839	0	0	0	139.6	91.5	31.9	136.9		High	Peak Found	Peak Found	High	High	0	5.087e-05	1.99	102.79
FALSE	High	[R].KPIGADSKEVHYKNR.[F]	R	3xAcetyl:2H(3) [K1; K8; K13]; 1xAcetyl:2H(3) [N-Term]	Q13642 3xAcetyl:2H(3) [K45; K52; K57]; 1xAcetyl:2H(3) [N-Term]	FALSE	0.00314444	0	1	1	2	Q13642	Q13642 [45-59]	0	1922.05	0	1.248	1.587	0.72	0.799447	0.746282	0.985609	0	0	0	87.8	109.6	139.4	63.2		Peak Found	Peak Found	High	Peak Found	High	0	2.635e-05	4.28	32.86
FALSE	High	[R].KNLDVMKEAMVQAEEAAAEITR.[K]	R	2xAcetyl:2H(3) [K1; K7]	O00567 2xAcetyl:2H(3) [K416; K422]	FALSE	0.00421591	0	1	1	1	O00567	O00567 [416-437]	0	2537.29	0														No Quan Values	Not Found	Not Found	Not Found	High	High	0	4.327e-05	4.78
FALSE	High	[E].KNEAIQAAHDAVAQEGQCR.[V]	E	1xCarbamidomethyl [C18]; 1xAcetyl:2H(3) [K1]; 1xAcetyl:2H(3) [N-Term]	P09936 1xCarbamidomethyl [C152]; 1xAcetyl:2H(3) [K135]; 1xAcetyl:2H(3) [N-Term]	FALSE	4.86189e-05	0	1	1	1	P09936	P09936 [135-153]	0	2186.05	0	100	100	100	4.34403e-17	3.7678e-17	4.94188e-17					117.9	103.3	178.8		Not Found	Peak Found	Peak Found	High	High	0	2.197e-08	6.34	45.85
FALSE	High	[R].IAAEEKKKQDELKR.[I]	R	4xAcetyl:2H(3) [K6; K7; K8; K13]	P56385 4xAcetyl:2H(3) [K48; K49; K50; K55]	FALSE	0.00216607	0	1	1	6	P56385	P56385 [43-56]	0	1866.07	0	0.488	0.309	0.761	0.883494	0.784677	0.994778	0	0	0	156.4	76.3	48.3	119		High	Peak Found	High	High	High	0	5.014e-05	5	33.1
FALSE	High	[R].LAAIVAKQVLLGR.[K]	R	1xAcetyl:2H(3) [K7]; 1xAcetyl:2H(3) [N-Term]	P40429 1xAcetyl:2H(3) [K25]; 1xAcetyl:2H(3) [N-Term]	FALSE	0.0140997	0	1	1	2	P40429	P40429 [19-31]	0	1441.94	0	0.502	0.452	0.806	0.905375	0.935887	0.9984	0	0	0	144.9	72.8	65.5	116.8		High	Peak Found	Peak Found	High	High	0	0.0005747	2.63	88.17
FALSE	High	[E].IAALVIDNGSGMCKAGFAGDDAPR.[A]	E	1xCarbamidomethyl [C13]; 1xAcetyl:2H(3) [K14]; 1xAcetyl:2H(3) [N-Term]	P63261 1xCarbamidomethyl [C17]; 1xAcetyl:2H(3) [K18]; 1xAcetyl:2H(3) [N-Term]	FALSE	1.31378e-05	0	1	1	77	P63261	P63261 [5-28]	0	2496.21	0	17.29	20.83	16.123	3.45446e-08	4.89996e-09	5.77908e-10	0	0	0	7.2	125.2	150.8	116.7		High	High	High	High	High	0	5.055e-06	5.92	68.38
FALSE	High	[E].IAALVIDNGSGMCKAGFAGDDAPR.[A]	E	1xCarbamidomethyl [C13]; 1xOxidation [M12]; 1xAcetyl:2H(3) [K14]; 1xAcetyl:2H(3) [N-Term]	P63261 1xCarbamidomethyl [C17]; 1xOxidation [M16]; 1xAcetyl:2H(3) [K18]; 1xAcetyl:2H(3) [N-Term]	FALSE	0.00233087	0	1	1	7	P63261	P63261 [5-28]	0	2512.21	0	24.266	29.175	20.021	4.03171e-06	0.000132669	5.02563e-06	0	0	0	5.4	130.4	156.7	107.5		Peak Found	High	High	High	High	0	5.505e-05	4.92	62.99
FALSE	High	[F].SQLGEHPPDLDLPENLVR.[A]	F	1xAcetyl:2H(3) [N-Term]	O15067 1xAcetyl:2H(3) [N-Term]	FALSE	0.0258636	0	1	1	1	O15067	O15067 [873-890]	0	2074.06	0	0.622	0.063	0.983	0.974516	0.171839	0.963108	0	0	0	149.9	93.3	9.4	147.4		Peak Found	Peak Found	High	Peak Found	High	0	0.0009639	3.11	54.59
FALSE	High	[E].IAMATVTALR.[R]	E	1xAcetyl:2H(3) [N-Term]	P04075 1xAcetyl:2H(3) [N-Term]; P09972 1xAcetyl:2H(3) [N-Term]	FALSE	0.0130279	0	1	2	28	P04075	P04075 [249-258]; P09972 [249-258]	0	1091.63	0	43.199	34.899	32.804	3.44521e-13	7.74654e-12	9.7009e-15	0	0	0	3.6	154.4	124.7	117.3		Peak Found	High	High	High	High	0	0.0002966	4.31	59.33
FALSE	High	[E].LALWDTAGQEDYDR.[L]	E	1xAcetyl:2H(3) [N-Term]	P08134 1xAcetyl:2H(3) [N-Term]; P62745 1xAcetyl:2H(3) [N-Term]; P61586 1xAcetyl:2H(3) [N-Term]	FALSE	0.00151962	0	2	3	17	P08134; P61586	P08134 [55-68]; P62745 [55-68]; P61586 [55-68]	0	1697.78	0	24.468	27.717	27.455	6.0603e-10	1.54852e-10	1.81816e-13	0	0	0	5	121.4	137.5	136.2	Shared	Peak Found	High	High	High	High	0	2.205e-05	4.07	63.54
FALSE	High	[R].IAIPGLAGAGNSVLLVSNLNPER.[V]	R	1xAcetyl:2H(3) [N-Term]	P26599 1xAcetyl:2H(3) [N-Term]	FALSE	0.0063469	0	1	1	1	P26599	P26599 [326-348]	0	2320.31	0	0.381	0.01	0.86	0.802121	3.7678e-17	0.989955	0		0	178.5	68		153.5		Peak Found	High	Not Found	Peak Found	High	0	8.681e-05	3.17	77.1
FALSE	High	[R].SQIKNEINIDTLAR.[D]	R	1xAcetyl:2H(3) [K4]; 1xAcetyl:2H(3) [N-Term]	Q8N766 1xAcetyl:2H(3) [K517]; 1xAcetyl:2H(3) [N-Term]	FALSE	0.0163138	0	1	1	1	Q8N766	Q8N766 [514-527]	0	1704.94	0	0.177	0.046	0.134	0.33028	0.121967	0.0621809	0	0	0	294.8	52.2	13.6	39.4		High	Peak Found	Peak Found	Peak Found	High	0	0.0004365	3.16	55.84
FALSE	High	[R].SQLIDELADKFNR.[L]	R	1xAcetyl:2H(3) [K10]; 1xAcetyl:2H(3) [N-Term]	Q8N3U4 1xAcetyl:2H(3) [K664]; 1xAcetyl:2H(3) [N-Term]	FALSE	0.00394194	0	1	1	6	Q8N3U4	Q8N3U4 [655-667]	0	1638.86	0	0.364	0.01	1.544	0.744139	3.7678e-17	0.700332	0		0	137.6	50		212.4		Peak Found	High	Not Found	High	High	0	0.0001641	4.41	80.28
FALSE	High	[R].SQNKEDYAGLKEEFR.[K]	R	2xAcetyl:2H(3) [K4; K11]; 1xAcetyl:2H(3) [N-Term]	P78417 2xAcetyl:2H(3) [K136; K143]; 1xAcetyl:2H(3) [N-Term]	FALSE	0.0291882	0	1	1	2	P78417	P78417 [133-147]	0	1948.96	0	7.342	4.062	10.904	0.0266962	0.358214	0.00414126	0	0	0	17.2	126	69.7	187.1		Peak Found	High	Peak Found	Peak Found	High	0.0009536	0.01612	3.49	52.07
FALSE	High	[E].LAILLGMLDPAEKDEKGMPVTAR.[V]	E	1xOxidation [M]; 2xAcetyl:2H(3) [K13; K16]; 1xAcetyl:2H(3) [N-Term]	P30041 1xOxidation [M]; 2xAcetyl:2H(3) [K122; K125]; 1xAcetyl:2H(3) [N-Term]	FALSE	0.000996712	0	1	1	16	P30041	P30041 [110-132]	0	2619.41	0	100	100	100	4.34403e-17	3.7678e-17	4.94188e-17					129.9	105.8	164.3		Not Found	High	High	High	High	0	3.742e-06	4.02	102.34
FALSE	High	[E].LAILLGMLDPAEKDEKGMPVTAR.[V]	E	2xAcetyl:2H(3) [K13; K16]; 1xAcetyl:2H(3) [N-Term]	P30041 2xAcetyl:2H(3) [K122; K125]; 1xAcetyl:2H(3) [N-Term]	FALSE	0.000259669	0	1	1	12	P30041	P30041 [110-132]	0	2603.41	0	100	100	100	4.34403e-17	3.7678e-17	4.94188e-17					104.2	122.5	173.3		Not Found	High	High	High	High	0	2.571e-05	4.22	102.6
FALSE	High	[E].LAIKDANAKLSELEAALQR.[A]	E	2xAcetyl:2H(3) [K4; K9]; 1xAcetyl:2H(3) [N-Term]	P05787 2xAcetyl:2H(3) [K347; K352]; 1xAcetyl:2H(3) [N-Term]	TRUE	2.45124e-05	0	1	1	6	P05787	P05787 [344-362]	0	2189.25	0	0.01	5.022	12.03	4.34403e-17	0.256805	0.00155017		0	0	22.2		111.3	266.6		Peak Found	Not Found	High	High	High	0	3.899e-07	5.64	88.72
FALSE	High	[E].LALALQEALEPAVR.[L]	E	1xAcetyl:2H(3) [N-Term]	Q5RKV6 1xAcetyl:2H(3) [N-Term]	FALSE	0.0100886	0	1	1	7	Q5RKV6	Q5RKV6 [122-135]	0	1538.9	0	9.009	18.874	16.81	0.0058123	4.26415e-05	8.11555e-07	0	0	0	8.8	78.9	165.2	147.2		Peak Found	High	High	High	High	0	0.0005011	2.69	82.44
FALSE	High	[R].LENNDNKPVTNSR.[D]	R	1xAcetyl:2H(3) [K7]	Q7Z739 1xAcetyl:2H(3) [K527]; Q9BYJ9 1xAcetyl:2H(3) [K500]	FALSE	0.00825057	0	1	2	2	Q7Z739	Q7Z739 [521-533]; Q9BYJ9 [494-506]	0	1545.77	0	1.799	1.483	1.762	0.56978	0.766399	0.615711	0	0	0	66.2	119.1	98.2	116.6		Peak Found	Peak Found	High	Peak Found	High	0	0.001297	3.72	17.9
FALSE	High	[E].LAKVEEEIQTLSQVLAAKEKHLAEIKR.[K]	E	4xAcetyl:2H(3) [K3; K18; K20; K26]; 1xAcetyl:2H(3) [N-Term]	P55327 4xAcetyl:2H(3) [K85; K100; K102; K108]; 1xAcetyl:2H(3) [N-Term]	FALSE	7.12801e-06	0	1	1	3	P55327	P55327 [83-109]	0	3299.9	0			100			4.94188e-17							400		Not Found	High	High	High	High	0	1.202e-07	4.76	102.42
FALSE	High	[E].LAKMSQEEVNVFR.[L]	E	1xAcetyl:2H(3) [K3]; 1xAcetyl:2H(3) [N-Term]	Q7L014 1xAcetyl:2H(3) [K344]; 1xAcetyl:2H(3) [N-Term]	FALSE	0.00518885	0	1	1	3	Q7L014	Q7L014 [342-354]	0	1640.86	0	100	100	100	4.34403e-17	3.7678e-17	4.94188e-17					183.8	5.7	210.5		Not Found	High	Peak Found	High	High	0	6.18e-05	3.85	63.64
FALSE	High	[R].SQPAILLLTAAR.[D]	R	1xAcetyl:2H(3) [N-Term]	Q5JTV8 1xAcetyl:2H(3) [N-Term]	FALSE	0.00491138	0	1	1	13	Q5JTV8	Q5JTV8 [405-416]	0	1298.79	0	1.197	0.966	1.062	0.76089	0.946606	0.838992	0	0	0	94.7	113.4	91.4	100.5		High	High	High	High	High	0.0002176	0.004064	3.68	63.78
FALSE	High	[R].LAKLSDGVAVLKVGGTSDVEVNEKKDR.[V]	R	4xAcetyl:2H(3) [K3; K12; K24; K25]	P10809 4xAcetyl:2H(3) [K396; K405; K417; K418]	FALSE	1.38448e-06	0	1	1	4	P10809	P10809 [394-420]	0	3007.67	0	0.01	0.01	9.847	4.34403e-17	3.7678e-17	0.0104454			0	36.9			363.1		Peak Found	Not Found	Not Found	High	High	0	5.143e-11	7.53	55.38
FALSE	High	[R].LAHEVGWKYQAVTATLEEKR.[K]	R	2xAcetyl:2H(3) [K8; K19]; 1xAcetyl:2H(3) [N-Term]	P40429 2xAcetyl:2H(3) [K148; K159]; 1xAcetyl:2H(3) [N-Term]	FALSE	0.00017029	0	1	1	2	P40429	P40429 [141-160]	0	2464.32	0	0.469	0.45	0.493	0.87306	0.935887	0.872352	0	0	0	165.9	77.8	74.6	81.8		High	Peak Found	Peak Found	Peak Found	High	0	1.848e-07	5.66	70.09
FALSE	High	[R].LAGTQPLEVLEAVQR.[S]	R			FALSE	0.00670524	0	1	1	1	P22314	P22314 [679-693]	0	1623.91	0	0.574	0.241	2.386	0.957078	0.703418	0.39576	0	0	0	95.2	54.6	22.9	227.2		Peak Found	Peak Found	Peak Found	High	High	0	9.574e-05	5.72	54.51
FALSE	High	[E].LAGNASKDLKVKR.[I]	E	3xAcetyl:2H(3) [K7; K10; K12]; 1xAcetyl:2H(3) [N-Term]	Q71UI9 3xAcetyl:2H(3) [K75; K78; K80]; 1xAcetyl:2H(3) [N-Term]; P0C0S5 3xAcetyl:2H(3) [K75; K78; K80]; 1xAcetyl:2H(3) [N-Term]	FALSE	0.000690675	0	2	2	21	Q71UI9; P0C0S5	Q71UI9 [69-81]; P0C0S5 [69-81]	0	1579.96	0	100	100	100	4.34403e-17	3.7678e-17	4.94188e-17	0	0	0	0.6	158.7	126.4	114.4	Shared	Peak Found	High	High	High	High	0	1.499e-05	4.94	44.74
FALSE	High	[E].LAGHQTSAESWGTGR.[A]	E	1xAcetyl:2H(3) [N-Term]	P36578 1xAcetyl:2H(3) [N-Term]	FALSE	0.00235954	0	1	1	1	P36578	P36578 [57-71]	0	1602.77	0	100	100	100	4.34403e-17	3.7678e-17	4.94188e-17					199	49.3	151.7		Not Found	Peak Found	Peak Found	High	High	0	1.615e-05	5.15	33.19
FALSE	High	[E].IAEKALKKHKER.[I]	E	4xAcetyl:2H(3) [K4; K7; K8; K10]; 1xAcetyl:2H(3) [N-Term]	P31943 4xAcetyl:2H(3) [K167; K170; K171; K173]; 1xAcetyl:2H(3) [N-Term]; P55795 4xAcetyl:2H(3) [K167; K170; K171; K173]; 1xAcetyl:2H(3) [N-Term]	FALSE	0.00368576	0	2	2	3	P31943; P55795	P31943 [164-175]; P55795 [164-175]	0	1676.03	0	30.247	19.394	33.477	2.38973e-07	0.00562455	5.59111e-10	0	0	0	4.8	143.8	92.2	159.2	Shared	Peak Found	Peak Found	High	High	High	0	3.469e-05	4.69	41.7
FALSE	High	[E].IADTPSGDKTSLETR.[F]	E	1xAcetyl:2H(3) [K9]; 1xAcetyl:2H(3) [N-Term]	P08133 1xAcetyl:2H(3) [K540]; 1xAcetyl:2H(3) [N-Term]	FALSE	0.0134302	0	1	1	33	P08133	P08133 [532-546]	0	1680.86	0	100	100	100	4.34403e-17	3.7678e-17	4.94188e-17	0	0	0	1.2	132.8	130.4	135.7		Peak Found	High	High	High	High	0.001207	0.01874	3.19	38.99
FALSE	High	[E].IADLGEALATAVIPQWQKDELR.[E]	E	1xAcetyl:2H(3) [K18]; 1xAcetyl:2H(3) [N-Term]	P49588 1xAcetyl:2H(3) [K812]; 1xAcetyl:2H(3) [N-Term]	FALSE	0.00070346	0	1	1	13	P49588	P49588 [795-816]	0	2527.37	0	35.455	46.709	39.766	1.31915e-05	0.00631862	3.06071e-05	0	0	0	3.3	115.4	152	129.4		Peak Found	High	High	High	High	0	5.956e-05	4.35	91.47
FALSE	High	[R].SREDAGDNDDTEGAIGVR.[N]	R	1xAcetyl:2H(3) [N-Term]	Q9H0S4 1xAcetyl:2H(3) [N-Term]	FALSE	0.000204576	0	1	1	11	Q9H0S4	Q9H0S4 [424-441]	1	1921.86	0	0.854	0.404	1.091	0.935955	0.939214	0.919342	0	0	0	119.4	102	48.2	130.4		Peak Found	High	High	High	High	0	5.332e-05	5.24	24.75
FALSE	High	[E].LAKSAPAPKKGSKKAVTKAQKKDGKKR.[K]	E	10xAcetyl:2H(3) [K3; K9; K10; K13; K14; K18; K21; K22; K25; K26]	Q99880 10xAcetyl:2H(3) [K6; K12; K13; K16; K17; K21; K24; K25; K28; K29]	FALSE	0.000108977	0	1	1	18	Q99880	Q99880 [4-30]	0	3300.05	3	0.844	0.768	1.118	0.960927	0.990877	0.854985	0	0	0	107.2	90.6	82.3	119.9		High	High	High	High	High	0	2.64e-06	6.45	38.05
FALSE	High	[R].LENNENKPVTNSR.[D]	R	1xAcetyl:2H(3) [K7]	Q9Y5A9 1xAcetyl:2H(3) [K521]	FALSE	0.00476368	0	1	1	3	Q9Y5A9	Q9Y5A9 [515-527]	0	1559.79	0	0.219	0.17	0.523	0.45992	0.579282	0.872352	0	0	0	209.2	45.8	35.5	109.5		High	Peak Found	Peak Found	High	High	0	8.542e-05	4.1	18.09
FALSE	High	[R].SNVTAVHKANIMR.[M]	R	1xOxidation [M12]; 1xAcetyl:2H(3) [K8]; 1xAcetyl:2H(3) [N-Term]	P50213 1xOxidation [M204]; 1xAcetyl:2H(3) [K200]; 1xAcetyl:2H(3) [N-Term]	FALSE	0.0201751	0	1	1	1	P50213	P50213 [193-205]	0	1546.83	0	0.367	0.522	0.437	0.743559	0.956392	0.807223	0	0	0	172	63.1	89.8	75.1		High	Peak Found	Peak Found	Peak Found	High	0	0.0006289	3.87	26.17
FALSE	High	[E].IEQVILVGGATR.[V]	E	1xAcetyl:2H(3) [N-Term]	Q9Y4L1 1xAcetyl:2H(3) [N-Term]	FALSE	0.0215665	0	1	1	2	Q9Y4L1	Q9Y4L1 [377-388]	0	1300.77	0	100	100	100	4.34403e-17	3.7678e-17	4.94188e-17					208	116.4	75.6		Not Found	High	Peak Found	Peak Found	High	0.003574	0.04131	2.68	59.37
FALSE	High	[R].SLVEIIEHGLVDEQQKVR.[T]	R	1xAcetyl:2H(3) [K16]; 1xAcetyl:2H(3) [N-Term]	O75533 1xAcetyl:2H(3) [K700]; 1xAcetyl:2H(3) [N-Term]	FALSE	2.45124e-05	0	1	1	14	O75533	O75533 [685-702]	0	2182.2	0	0.133	0.01	1.522	0.0695968	3.7678e-17	0.390862	0		0	150.7	20		229.4		High	High	Not Found	High	High	0	2.025e-07	6.54	79.35
FALSE	High	[E].ILLLEDQNSKFIKEKKLMEDR.[I]	E	4xAcetyl:2H(3) [K10; K13; K15; K16]; 1xAcetyl:2H(3) [N-Term]	P35580 4xAcetyl:2H(3) [K996; K999; K1001; K1002]; 1xAcetyl:2H(3) [N-Term]	FALSE	7.8812e-05	0	1	1	10	P35580	P35580 [987-1007]	0	2815.57	0	100	100	100	4.34403e-17	3.7678e-17	4.94188e-17					98.8	150.2	151		Not Found	High	High	High	High	0	6.181e-08	5.64	85.33
FALSE	High	[E].LLLLAAAGEGLER.[Q]	E	1xAcetyl:2H(3) [N-Term]	Q8N8R5 1xAcetyl:2H(3) [N-Term]	FALSE	0.00179225	0	1	1	25	Q8N8R5	Q8N8R5 [71-83]	0	1370.81	0	18.898	22.946	17.244	0.000256119	0.0169315	0.000595357	0	0	0	6.7	125.8	152.8	114.8		Peak Found	High	High	High	High	0	0.0003052	4.04	90.04
FALSE	High	[E].ILIGTIPGAGGTQR.[L]	E	1xAcetyl:2H(3) [N-Term]	P30084 1xAcetyl:2H(3) [N-Term]	FALSE	0.0176539	0	1	1	16	P30084	P30084 [165-178]	0	1398.81	0	100	100	100	4.34403e-17	3.7678e-17	4.94188e-17					118.2	101.7	180.1		Not Found	High	High	High	High	0	0.001072	2.25	58.57
FALSE	High	[E].ILKVEQKYNKLR.[Q]	E	3xAcetyl:2H(3) [K3; K7; K10]; 1xAcetyl:2H(3) [N-Term]	Q01105 3xAcetyl:2H(3) [K68; K72; K75]; 1xAcetyl:2H(3) [N-Term]; P0DME0 3xAcetyl:2H(3) [K78; K82; K85]; 1xAcetyl:2H(3) [N-Term]	FALSE	0.00223327	0	1	2	39	Q01105	Q01105 [66-77]; P0DME0 [76-87]	0	1712.05	0	16.394	18.836	20.088	6.14911e-08	1.5508e-08	2.41686e-11	0	0	0	7.1	116.4	133.8	142.7		Peak Found	High	High	High	High	0	4.324e-05	4.27	68.04
FALSE	High	[E].LIKVEGKVGGR.[L]	E	2xAcetyl:2H(3) [K3; K7]; 1xAcetyl:2H(3) [N-Term]	P48643 2xAcetyl:2H(3) [K210; K214]; 1xAcetyl:2H(3) [N-Term]	FALSE	0.017126	0	1	1	11	P48643	P48643 [208-218]	0	1290.81	0	29.732	23.45	16.084	5.35542e-11	1.20957e-09	5.96703e-10	0	0	0	5.7	169.3	133.5	91.6		Peak Found	High	High	High	High	0	0.0004738	3.39	53.23
FALSE	High	[R].SLVLDTKDLTIEKVVINGQEVKYALGER.[Q]	R	3xAcetyl:2H(3) [K7; K13; K22]; 1xAcetyl:2H(3) [N-Term]	P09960 3xAcetyl:2H(3) [K58; K64; K73]; 1xAcetyl:2H(3) [N-Term]	FALSE	0.00949229	0	1	1	2	P09960	P09960 [52-79]	0	3310.85	0			100			4.94188e-17							400		Not Found	Not Found	Not Found	High	High	0	0.0001725	4.7	100.23
FALSE	High	[E].LIKALQDLENAASGDATVR.[Q]	E	1xAcetyl:2H(3) [K3]; 1xAcetyl:2H(3) [N-Term]	Q9NQG5 1xAcetyl:2H(3) [K182]; 1xAcetyl:2H(3) [N-Term]	FALSE	3.80701e-05	0	1	1	9	Q9NQG5	Q9NQG5 [180-198]	0	2075.12	0	23.992	43.436	46.074	0.000210586	0.00656304	1.24267e-05	0	0	0	3.5	83.8	151.7	161		Peak Found	High	High	High	High	0	7.038e-08	5.62	90.97
FALSE	High	[R].ILGLLDAYLKTR.[T]	R	1xAcetyl:2H(3) [K10]; 1xAcetyl:2H(3) [N-Term]	P26641 1xAcetyl:2H(3) [K147]; 1xAcetyl:2H(3) [N-Term]	FALSE	0.0040642	0	1	1	20	P26641	P26641 [138-149]	0	1465.89	0	0.791	0.458	0.757	0.971942	0.939687	0.987852	0	0	0	133	105.2	61	100.8		High	High	High	High	High	0	0.0005025	3.69	98.05
FALSE	High	[R].SLYASSPGGVYATR.[S]	R	1xAcetyl:2H(3) [N-Term]	P08670 1xAcetyl:2H(3) [N-Term]	FALSE	0.00575636	0	1	1	29	P08670	P08670 [51-64]	0	1473.74	0	0.364	0.427	0.303	0.387778	0.521765	0.211129	0	0	0	191	69.5	81.6	57.9		High	High	High	High	High	6.911e-05	0.002182	2.78	39.92
FALSE	High	[R].ILGGVISAISEAAAQYNPEPPPPR.[T]	R	1xAcetyl:2H(3) [N-Term]	P04632 1xAcetyl:2H(3) [N-Term]	FALSE	0.00630828	0	1	1	2	P04632	P04632 [61-84]	0	2492.32	0	0.268	1.321	0.738	0.686394	0.809411	0.98567	0	0	0	120.2	32.2	158.8	88.7		High	Peak Found	High	Peak Found	High	6.911e-05	0.001371	4.82	95.41
FALSE	High	[E].LLGDVLKDRPQEADGIDSVIVVDNVPQVGPDR.[L]	E	1xAcetyl:2H(3) [K7]; 1xAcetyl:2H(3) [N-Term]	P55884 1xAcetyl:2H(3) [K174]; 1xAcetyl:2H(3) [N-Term]	FALSE	0.023334	0	1	1	3	P55884	P55884 [168-199]	0	3518.86	0	100	100	100	4.34403e-17	3.7678e-17	4.94188e-17					12.7	11.4	375.9		Not Found	Peak Found	Peak Found	High	High	0.0006112	0.01023	2.75	71.73
FALSE	High	[R].LIGDAAKNQVAMNPTNTVFDAKR.[L]	R	2xAcetyl:2H(3) [K7; K22]	P11142 2xAcetyl:2H(3) [K56; K71]	FALSE	0.000140027	0	1	1	6	P11142	P11142 [50-72]	0	2564.34	0	0.778	0.882	0.638	0.978808	0.954008	0.963108	0	0	0	121.3	94.4	107	77.4		High	High	Peak Found	Peak Found	High	0	6.346e-06	5.3	49.69
FALSE	High	[R].LIGDAAKNQVALNPQNTVFDAKR.[L]	R	2xAcetyl:2H(3) [K7; K22]	P0DMV9 2xAcetyl:2H(3) [K56; K71]	FALSE	0.00018551	0	1	1	4	P0DMV9	P0DMV9 [50-72]	0	2573.4	0	1.069	1.468	0.656	0.869231	0.811342	0.963108	0	0	0	95.4	102	140.1	62.6		Peak Found	High	Peak Found	High	High	0	2.133e-07	5.74	50.28
FALSE	High	[E].LIGAATALGEQPVKSLLDPKVAAR.[L]	E	2xAcetyl:2H(3) [K14; K20]; 1xAcetyl:2H(3) [N-Term]	O15067 2xAcetyl:2H(3) [K731; K737]; 1xAcetyl:2H(3) [N-Term]	FALSE	0.00142081	0	1	1	3	O15067	O15067 [718-741]	0	2553.5	0	100	100	100	4.34403e-17	3.7678e-17	4.94188e-17					150	116.4	133.6		Not Found	High	Peak Found	Peak Found	High	0	3.38e-05	4.7	80.68
FALSE	High	[E].LLGAAAAIEAAAKKLEQLKPR.[A]	E	3xAcetyl:2H(3) [K13; K14; K19]; 1xAcetyl:2H(3) [N-Term]	Q9Y490 3xAcetyl:2H(3) [K2321; K2322; K2327]; 1xAcetyl:2H(3) [N-Term]	FALSE	8.45908e-06	0	1	1	16	Q9Y490	Q9Y490 [2309-2329]	0	2342.42	0	100	100	100	4.34403e-17	3.7678e-17	4.94188e-17					197.9	55.5	146.6		Not Found	High	High	High	High	0	1.671e-07	4.86	102.91
FALSE	High	[E].LIFALAKTNR.[L]	E	1xAcetyl:2H(3) [K7]; 1xAcetyl:2H(3) [N-Term]	Q00610 1xAcetyl:2H(3) [K1179]; 1xAcetyl:2H(3) [N-Term]	FALSE	0.0160192	0	1	1	40	Q00610	Q00610 [1173-1182]	0	1236.76	0	54.827	18.327	17.217	1.04795e-14	0.0088694	3.609e-05	0	0	0	4.4	240	80.2	75.4		Peak Found	High	High	High	High	0	0.001129	3.67	75.41
FALSE	High	[R].LIFAGKQLEDGR.[T]	R	1xAcetyl:2H(3) [K6]; 1xAcetyl:2H(3) [N-Term]	P62987 1xAcetyl:2H(3) [K48]; 1xAcetyl:2H(3) [N-Term]; P62979 1xAcetyl:2H(3) [K48]; 1xAcetyl:2H(3) [N-Term]; P0CG47 1xAcetyl:2H(3) [K48]; 1xAcetyl:2H(3) [N-Term]; 1xAcetyl:2H(3) [K166]; 1xAcetyl:2H(3) [N-Term]; 1xAcetyl:2H(3) [K360]; 1xAcetyl:2H(3) [N-Term]; P0CG48 1xAcetyl:2H(3) [K48]; 1xAcetyl:2H(3) [N-Term]; 1xAcetyl:2H(3) [K166]; 1xAcetyl:2H(3) [N-Term]; 1xAcetyl:2H(3) [K360]; 1xAcetyl:2H(3) […	FALSE	0.0189876	0	1	4	14	P62979	P62987 [43-54]; P62979 [43-54]; P0CG47 [43-54]; [119-130]; [195-206]; P0CG48 [43-54]; [119-130]; [195-206]; [271-282]; [347-358]; [423-434]; [499-510]; [575-586]; [651-662]	0	1436.8	0	0.998	0.952	0.736	0.907346	0.949577	0.966123	0	0	0	108.5	108.3	103.3	79.9		High	High	High	High	High	0.0006551	0.01197	3.95	63.87
FALSE	High	[R].LIFAGKQLEDGR.[T]	R	1xAcetyl:2H(3) [K6]	P62987 1xAcetyl:2H(3) [K48]; P62979 1xAcetyl:2H(3) [K48]; P0CG47 1xAcetyl:2H(3) [K48]; 1xAcetyl:2H(3) [K166]; 1xAcetyl:2H(3) [K360]; P0CG48 1xAcetyl:2H(3) [K48]; 1xAcetyl:2H(3) [K166]; 1xAcetyl:2H(3) [K360]; 1xAcetyl:2H(3) [K630]; 1xAcetyl:2H(3) [K976]; 1xAcetyl:2H(3) [K1398]; 1xAcetyl:2H(3) [K1896]; 1xAcetyl:2H(3) [K2470]; 1xAcetyl:2H(3) [K3120]	FALSE	0.0157299	0	1	4	5	P62979	P62987 [43-54]; P62979 [43-54]; P0CG47 [43-54]; [119-130]; [195-206]; P0CG48 [43-54]; [119-130]; [195-206]; [271-282]; [347-358]; [423-434]; [499-510]; [575-586]; [651-662]	0	1391.77	0	0.902	1.942	0.94	0.944502	0.241388	0.942762	0	0	0	83.6	75.4	162.4	78.6		Peak Found	High	High	High	High	0	0.0004109	4.1	42.45
FALSE	High	[R].ILENEKDLEEAEEYKEAR.[L]	R	2xAcetyl:2H(3) [K6; K15]; 1xAcetyl:2H(3) [N-Term]	O75347 2xAcetyl:2H(3) [K86; K95]; 1xAcetyl:2H(3) [N-Term]	FALSE	0.00419024	0	1	1	1	O75347	O75347 [81-98]	0	2343.15	0	0.01	0.01	0.01	4.34403e-17	3.7678e-17	4.94188e-17				400					High	Not Found	Not Found	Not Found	High	0	4.309e-05	4.71	60.38
FALSE	High	[R].ILENEKDLEEAEEYKEAR.[L]	R	2xAcetyl:2H(3) [K6; K15]	O75347 2xAcetyl:2H(3) [K86; K95]	FALSE	8.90641e-05	0	1	1	3	O75347	O75347 [81-98]	0	2298.13	0	0.01	0.01	0.01	4.34403e-17	3.7678e-17	4.94188e-17				400					High	Not Found	Not Found	Not Found	High	0	6.135e-08	6.1	45.42
FALSE	High	[E].LIEKNLETPLCKNGFLLDGFPR.[T]	E	1xCarbamidomethyl [C11]; 2xAcetyl:2H(3) [K4; K12]; 1xAcetyl:2H(3) [N-Term]	P54819 1xCarbamidomethyl [C92]; 2xAcetyl:2H(3) [K85; K93]; 1xAcetyl:2H(3) [N-Term]	FALSE	0.00476368	0	1	1	5	P54819	P54819 [82-103]	0	2709.46	0	61.85	60.677	30.868	1.3805e-07	0.000261304	5.37409e-05	0	0	0	2.6	160.2	157.2	80		Peak Found	High	High	Peak Found	High	0	5.325e-05	4.4	80.12
FALSE	High	[R].SMLAALIAAQATALNR.[G]	R	1xAcetyl:2H(3) [N-Term]	Q8IY67 1xAcetyl:2H(3) [N-Term]	FALSE	0.000444732	0	1	1	1	Q8IY67	Q8IY67 [305-320]	0	1659.93	0	0.101	0.01	0.459	0.0677361	3.7678e-17	0.797254	0		0	256.4	26		117.6		High	Peak Found	Not Found	Peak Found	High	0	9.474e-07	3.81	85.45
FALSE	High	[R].LLLPGELAKHAVSEGTKAVTKYTSSK.[-]	R	4xAcetyl:2H(3) [K9; K17; K21; K26]; 1xAcetyl:2H(3) [N-Term]	Q16778 4xAcetyl:2H(3) [K109; K117; K121; K126]; 1xAcetyl:2H(3) [N-Term]; Q5QNW6 4xAcetyl:2H(3) [K109; K117; K121; K126]; 1xAcetyl:2H(3) [N-Term]; Q99879 4xAcetyl:2H(3) [K109; K117; K121; K126]; 1xAcetyl:2H(3) [N-Term]; P33778 4xAcetyl:2H(3) [K109; K117; K121; K126]; 1xAcetyl:2H(3) [N-Term]; P58876 4xAcetyl:2H(3) [K109; K117; K121; K126]; 1xAcetyl:2H(3) [N-Term]; Q96A08 4xAcetyl:2H(3) [K110; K118;…	FALSE	0.00384679	0	7	12	11	Q5QNW6; P33778; P58876; Q99880; Q8N257; P23527; Q99877	Q16778 [101-126]; Q5QNW6 [101-126]; Q99879 [101-126]; P33778 [101-126]; P58876 [101-126]; Q96A08 [102-127]; Q93079 [101-126]; Q99880 [101-126]; P62807 [101-126]; Q8N257 [101-126]; P23527 [101-126]; Q99877 [101-126]	0	2953.67	0	0.714	0.867	1.059	0.952813	0.987435	0.848385	0	0	0	109.9	78.4	95.3	116.4	Shared	High	High	High	High	High	0	3.726e-05	4.88	89.85
FALSE	High	[M].SLVDLGKKLLEAAR.[A]	M	1xAcetyl [N-Term]; 2xAcetyl:2H(3) [K7; K8]	Q06547 1xAcetyl [N-Term]; 2xAcetyl:2H(3) [K8; K9]	FALSE	0.000634019	0	1	1	11	Q06547	Q06547 [2-15]	0	1644.98	0	0.732	1.078	0.903	0.974516	0.868744	0.956839	0	0	0	107.7	78.8	116.2	97.3		High	High	High	High	High	0	6.416e-05	3.55	89.78
FALSE	High	[H].SLTPVAQADPLVR.[R]	H	1xAcetyl:2H(3) [N-Term]	Q14444 1xAcetyl:2H(3) [N-Term]	FALSE	0.0144468	0	1	1	1	Q14444	Q14444 [343-355]	0	1411.8	0	0.061	0.01	0.046	0.00769204	3.7678e-17	0.000318469	0		0	361.1	22.2		16.7		High	Peak Found	Not Found	Peak Found	High	0	0.0003542	3.43	49.22
FALSE	High	[R].IINEPTAAAIAYGLDKKVGAER.[N]	R	2xAcetyl:2H(3) [K16; K17]; 1xAcetyl:2H(3) [N-Term]	P11142 2xAcetyl:2H(3) [K187; K188]; 1xAcetyl:2H(3) [N-Term]	FALSE	0.000444732	0	1	1	9	P11142	P11142 [172-193]	0	2435.35	0	0.41	0.37	0.538	0.751166	0.728975	0.835967	0	0	0	172.5	70.8	63.8	92.9		High	High	High	High	High	0	1.764e-06	4.61	75.62
FALSE	High	[E].LNGKLTGMAFR.[V]	E	1xAcetyl:2H(3) [K4]; 1xAcetyl:2H(3) [N-Term]	P04406 1xAcetyl:2H(3) [K227]; 1xAcetyl:2H(3) [N-Term]	FALSE	0.0226378	0	1	1	5	P04406	P04406 [224-234]	0	1297.72	0	4.463	44.072	3.927	0.0871481	1.57909e-06	0.140678	0	0	0	7.5	33.4	329.7	29.4		Peak Found	High	High	Peak Found	High	0.0001879	0.003277	2.8	59.39
FALSE	High	[E].SLNNLFITEEDYQALR.[T]	E	1xAcetyl:2H(3) [N-Term]	Q00610 1xAcetyl:2H(3) [N-Term]	FALSE	0.000496471	0	1	1	4	Q00610	Q00610 [1466-1481]	0	1970.99	0	39.608	40.788	48.433	6.10177e-06	0.00314529	2.75343e-08	0	0	0	3.1	122	125.7	149.2		Peak Found	High	Peak Found	High	High	0	2.507e-05	4.95	66.28
FALSE	High	[E].INFVGLLIGPR.[G]	E	1xAcetyl:2H(3) [N-Term]	Q15637 1xAcetyl:2H(3) [N-Term]	FALSE	0.00515727	0	1	1	28	Q15637	Q15637 [150-160]	0	1243.76	0	100	100	100	4.34403e-17	3.7678e-17	4.94188e-17					174.6	137.3	88		Not Found	High	High	High	High	0	0.0001453	3.84	87.03
FALSE	High	[R].LNEQASEEILKVEQKYNKLR.[Q]	R	3xAcetyl:2H(3) [K11; K15; K18]	Q01105 3xAcetyl:2H(3) [K68; K72; K75]	FALSE	0.00164528	0	1	1	19	Q01105	Q01105 [58-77]	0	2567.4	0	0.968	1.958	1.899	0.916928	0.631175	0.453324	0	0	0	68.7	66.5	134.5	130.4		High	High	High	High	High	0	1.393e-05	4.59	61.21
FALSE	High	[R].SIPAYLAETLYYAMKGAGTDDHTLIR.[V]	R	1xAcetyl:2H(3) [K15]; 1xAcetyl:2H(3) [N-Term]	P08758 1xAcetyl:2H(3) [K260]; 1xAcetyl:2H(3) [N-Term]	FALSE	0.000348244	0	1	1	2	P08758	P08758 [246-271]	0	2960.5	0	1.152	0.01	0.369	0.828082	3.7678e-17	0.661829	0		0	158.7	182.8		58.5		High	High	Not Found	Peak Found	High	0	6.217e-07	3.39	95.5
FALSE	High	[R].SLPLLLSQAGVR.[T]	R	1xAcetyl:2H(3) [N-Term]	P51688 1xAcetyl:2H(3) [N-Term]	FALSE	0.00314444	0	1	1	1	P51688	P51688 [106-117]	0	1298.79	0	1.4	0.1	0.985	0.713466	0.359912	0.960825	0	0	0	114.8	160.7	11.4	113.1		High	Peak Found	Peak Found	Peak Found	High	0	2.637e-05	3.76	69.94
FALSE	High	[E].LNALMTDETISNVPILILGNKIDR.[T]	E	1xAcetyl:2H(3) [K21]; 1xAcetyl:2H(3) [N-Term]	Q9NR31 1xAcetyl:2H(3) [K135]; 1xAcetyl:2H(3) [N-Term]	FALSE	0.00212672	0	1	1	3	Q9NR31	Q9NR31 [115-138]	0	2743.52	0		100	100		3.7678e-17	4.94188e-17						112.5	287.5		Not Found	Not Found	High	Peak Found	High	0	1.358e-05	5.44	90.59
FALSE	High	[E].IMQKEADETKLAEEIPLKILAHNGLVGR.[L]	E	3xAcetyl:2H(3) [K4; K10; K18]; 1xAcetyl:2H(3) [N-Term]	Q9Y6M1 3xAcetyl:2H(3) [K264; K270; K278]; 1xAcetyl:2H(3) [N-Term]	FALSE	0.000990638	0	1	1	5	Q9Y6M1	Q9Y6M1 [261-288]	0	3296.83	0	100	100	100	4.34403e-17	3.7678e-17	4.94188e-17					118.8	164.9	116.3		Not Found	High	High	High	High	0	6.173e-05	3.51	85.64
FALSE	High	[E].IMIPASKAGLVIGKGGETIKQLQER.[A]	E	1xOxidation [M2]; 3xAcetyl:2H(3) [K7; K14; K20]; 1xAcetyl:2H(3) [N-Term]	Q96AE4 1xOxidation [M191]; 3xAcetyl:2H(3) [K196; K203; K209]; 1xAcetyl:2H(3) [N-Term]	FALSE	0.000199633	0	1	1	4	Q96AE4	Q96AE4 [190-214]	0	2833.62	0	15.095	0.01	32.65	0.00128837	3.7678e-17	5.26263e-05	0		0	8.2	123.9		267.9		Peak Found	High	Not Found	High	High	0	2.425e-07	5.59	75.08
FALSE	High	[E].IMIPASKAGLVIGKGGETIKQLQER.[A]	E	3xAcetyl:2H(3) [K7; K14; K20]; 1xAcetyl:2H(3) [N-Term]	Q96AE4 3xAcetyl:2H(3) [K196; K203; K209]; 1xAcetyl:2H(3) [N-Term]	FALSE	1.86325e-07	0	1	1	31	Q96AE4	Q96AE4 [190-214]	0	2817.63	0	12.903	9.197	34.33	7.36001e-07	0.000127212	4.32855e-15	0	0	0	7	89.9	64.1	239.1		Peak Found	High	High	High	High	0	1.173e-07	5.5	81.96
FALSE	High	[R].SLQGKSTTLFSR.[H]	R	1xAcetyl:2H(3) [K5]; 1xAcetyl:2H(3) [N-Term]	P53396 1xAcetyl:2H(3) [K488]; 1xAcetyl:2H(3) [N-Term]	FALSE	0.0164132	0	1	1	14	P53396	P53396 [484-495]	0	1414.78	0	0.339	0.157	0.334	0.574816	0.205135	0.381703	0	0	0	218.6	74.2	34.3	73		High	High	High	High	High	0	0.0004403	3.02	49
FALSE	High	[R].SMMQSLSQNPDLAAQMMLNNPLFAGNPQLQEQMR.[Q]	R	1xAcetyl:2H(3) [N-Term]	Q9UMX0 1xAcetyl:2H(3) [N-Term]	FALSE	0.00238855	0	1	1	3	Q9UMX0	Q9UMX0 [402-435]	0	3878.82	0	0.01	0.01	0.808	4.34403e-17	3.7678e-17	0.991092			0	221.3			178.7		High	Not Found	Not Found	Peak Found	High	0	1.655e-05	4.53	82.3
FALSE	High	[E].IMIPAGKAGLVIGKGGETIKQLQER.[A]	E	1xOxidation [M2]; 3xAcetyl:2H(3) [K7; K14; K20]; 1xAcetyl:2H(3) [N-Term]	Q92945 1xOxidation [M239]; 3xAcetyl:2H(3) [K244; K251; K257]; 1xAcetyl:2H(3) [N-Term]	FALSE	0.000365701	0	1	1	2	Q92945	Q92945 [238-262]	0	2803.61	0	100		100	4.34403e-17		4.94188e-17					118.5		281.5		Not Found	High	Not Found	High	High	0	6.775e-07	5.02	73.9
FALSE	High	[E].IMLAAKKGLDPYNVLAPKGASGTR.[E]	E	3xAcetyl:2H(3) [K6; K7; K18]; 1xAcetyl:2H(3) [N-Term]	P10606 3xAcetyl:2H(3) [K56; K57; K68]; 1xAcetyl:2H(3) [N-Term]	FALSE	0.0092637	0	1	1	4	P10606	P10606 [51-74]	0	2651.5	0	100	100	100	4.34403e-17	3.7678e-17	4.94188e-17					72	109.3	218.7		Not Found	High	Peak Found	Peak Found	High	0.0002176	0.005115	4.2	77.76
FALSE	High	[E].IMEMKHKSETDTSLIR.[G]	E	2xAcetyl:2H(3) [K5; K7]; 1xAcetyl:2H(3) [N-Term]	P40227 2xAcetyl:2H(3) [K197; K199]; 1xAcetyl:2H(3) [N-Term]	FALSE	0.000331619	0	1	1	6	P40227	P40227 [193-208]	0	2054.06	0	100	100	100	4.34403e-17	3.7678e-17	4.94188e-17					93.6	143.4	163		Not Found	Peak Found	High	High	High	0	3.229e-05	5.08	56.26
FALSE	High	[R].ILVKKEELTLEGIR.[Q]	R	2xAcetyl:2H(3) [K4; K5]; 1xAcetyl:2H(3) [N-Term]	P60842 2xAcetyl:2H(3) [K237; K238]; 1xAcetyl:2H(3) [N-Term]	FALSE	0.00295808	0	1	1	2	P60842	P60842 [234-247]	0	1776.08	0	1.407	1.078	1.675	0.727153	0.880112	0.628113	0	0	0	77.5	109.1	83.6	129.9		Peak Found	Peak Found	Peak Found	High	High	0	4.667e-05	4	76.63
FALSE	High	[E].ILVDQSVVNSGNLLNDMTPPVNPSR.[E]	E	1xAcetyl:2H(3) [N-Term]	P27824 1xAcetyl:2H(3) [N-Term]	FALSE	0.00124205	0	1	1	7	P27824	P27824 [250-274]	0	2724.41	0	100		100	4.34403e-17		4.94188e-17					109.3		290.7		Not Found	High	Not Found	High	High	0	0.0006211	3	72.42
FALSE	High	[H].SLSGRPLKVKEDPDGEHAR.[R]	H	2xAcetyl:2H(3) [K8; K10]; 1xAcetyl:2H(3) [N-Term]	P52272 2xAcetyl:2H(3) [K143; K145]; 1xAcetyl:2H(3) [N-Term]	FALSE	0.00014526	0	1	1	2	P52272	P52272 [136-154]	0	2226.18	0	1.173	0.388	1.256	0.78156	0.547298	0.644866	0	0	0	104.8	122.9	40.7	131.6		High	High	Peak Found	Peak Found	High	0	1.362e-06	5.56	34.02
FALSE	High	[R].IISSIEQKEENKGGEDKLKMIR.[E]	R	4xAcetyl:2H(3) [K8; K12; K17; K19]	P62258 4xAcetyl:2H(3) [K69; K73; K78; K80]	FALSE	0.000346121	0	1	1	13	P62258	P62258 [62-83]	0	2725.48	0	0.587	1.043	0.501	0.812764	0.890526	0.661829	0	0	0	127.7	75	133.2	64		High	High	Peak Found	High	High	0	6.569e-07	5.19	50.94
FALSE	High	[R].LISQIVSSITASLR.[F]	R	1xAcetyl:2H(3) [N-Term]	Q9NY65 1xAcetyl:2H(3) [N-Term]; P68363 1xAcetyl:2H(3) [N-Term]; Q9BQE3 1xAcetyl:2H(3) [N-Term]; Q9H853 1xAcetyl:2H(3) [N-Term]; P68366 1xAcetyl:2H(3) [N-Term]	FALSE	0.00122695	0	1	5	15	P68363	Q9NY65 [230-243]; P68363 [230-243]; Q9BQE3 [230-243]; Q9H853 [169-182]; P68366 [230-243]	0	1532.91	0	4.964	7.102	16.436	0.0583384	0.19025	1.35876e-05	0	0	0	13.6	67.3	96.3	222.8		High	High	High	High	High	0	5.323e-06	3.85	102.29
FALSE	High	[R].LISQIVSSITASLR.[F]	R			FALSE	0.000527773	0	1	5	3	P68363	Q9NY65 [230-243]; P68363 [230-243]; Q9BQE3 [230-243]; Q9H853 [169-182]; P68366 [230-243]	0	1487.88	0	0.106	1.712	0.275	0.0782837	0.699148	0.435569	0	0	0	129.3	13.8	221.4	35.5		High	Peak Found	High	Peak Found	High	0	7.839e-06	4.45	69.82
FALSE	High	[R].SISLYYTGEKGQNQDYR.[G]	R	1xAcetyl:2H(3) [K10]; 1xAcetyl:2H(3) [N-Term]	P19338 1xAcetyl:2H(3) [K467]; 1xAcetyl:2H(3) [N-Term]	FALSE	0.0169193	0	1	1	1	P19338	P19338 [458-474]	0	2112.02	0	0.142	0.01	0.424	0.0647145	3.7678e-17	0.605965	0		0	255.4	36.3		108.3		High	Peak Found	Not Found	Peak Found	High	0	0.0004658	4.24	49.27
FALSE	High	[E].LLNLINKLNNDDNVDGLLVQLPLPEHIDER.[R]	E	1xAcetyl:2H(3) [K7]; 1xAcetyl:2H(3) [N-Term]	P13995 1xAcetyl:2H(3) [K119]; 1xAcetyl:2H(3) [N-Term]	FALSE	0.00943462	0	1	1	4	P13995	P13995 [113-142]	0	3526.9	0	100	100	100	4.34403e-17	3.7678e-17	4.94188e-17					175.2	104.7	120.1		Not Found	High	High	Peak Found	High	6.911e-05	0.001627	4.01	93.12
FALSE	High	[M].SLSNKLTLDKLDVKGKR.[V]	M	1xAcetyl [N-Term]; 4xAcetyl:2H(3) [K5; K10; K14; K16]	P00558 1xAcetyl [N-Term]; 4xAcetyl:2H(3) [K6; K11; K15; K17]	FALSE	7.8127e-06	0	1	1	21	P00558	P00558 [2-18]	0	2137.26	0	0.897	0.784	1.03	0.960927	0.969912	0.872352	0	0	0	107.8	96.7	84.5	111		High	High	High	High	High	0	9.763e-10	5.96	62.36
FALSE	High	[E].IMIPAGKAGLVIGKGGETIKQLQER.[A]	E	3xAcetyl:2H(3) [K7; K14; K20]; 1xAcetyl:2H(3) [N-Term]	Q92945 3xAcetyl:2H(3) [K244; K251; K257]; 1xAcetyl:2H(3) [N-Term]	FALSE	3.68274e-06	0	1	1	28	Q92945	Q92945 [238-262]	0	2787.62	0	21.147	15.701	79.912	3.50406e-09	1.14475e-07	4.94188e-17	0	0	0	3.4	71.8	53.3	271.4		Peak Found	High	High	High	High	0	4.3e-09	5.8	79.99
FALSE	High	[R].KNAKKGQGGAGAGDDEEED.[-]	R	3xAcetyl:2H(3) [K1; K4; K5]	P46781 3xAcetyl:2H(3) [K176; K179; K180]	FALSE	0.00035469	0	1	1	3	P46781	P46781 [176-194]	0	2010.92	0	0.412	0.47	0.915	0.812764	0.944796	0.963814	0	0	0	143	58.9	67.2	130.9		High	Peak Found	Peak Found	Peak Found	High	0	1.67e-06	4.37	19.4
FALSE	High	[E].LLDSPGKVLLQSKDQITAGNAAR.[K]	E	2xAcetyl:2H(3) [K7; K13]; 1xAcetyl:2H(3) [N-Term]	P22234 2xAcetyl:2H(3) [K30; K36]; 1xAcetyl:2H(3) [N-Term]	FALSE	0.000388759	0	1	1	5	P22234	P22234 [24-46]	0	2530.42	0	100	100	100	4.34403e-17	3.7678e-17	4.94188e-17					69.6	145.9	184.5		Not Found	High	Peak Found	High	High	0	7.541e-07	4.53	71.55
FALSE	High	[E].IKTLEEDEEELFKMR.[A]	E	1xOxidation [M14]; 2xAcetyl:2H(3) [K2; K13]; 1xAcetyl:2H(3) [N-Term]	P43487 1xOxidation [M51]; 2xAcetyl:2H(3) [K39; K50]; 1xAcetyl:2H(3) [N-Term]	FALSE	0.000386389	0	1	1	12	P43487	P43487 [38-52]	0	2061.04	0	17.09	18.979	10.718	5.6474e-06	3.37923e-05	0.000222721	0	0	0	8.4	143.1	158.9	89.7		Peak Found	High	High	High	High	0	7.45e-07	4.41	74.67
FALSE	High	[E].LGLIEQAYDNPHEALSR.[I]	E	1xAcetyl:2H(3) [N-Term]	Q6P2Q9 1xAcetyl:2H(3) [N-Term]	FALSE	0.00743802	0	1	1	4	Q6P2Q9	Q6P2Q9 [864-880]	0	1971	0	100		100	4.34403e-17		4.94188e-17					183.7		216.3		Not Found	Peak Found	Not Found	High	High	0	0.001012	3.26	64.34
FALSE	High	[R].LGIEKTDPTTLTDEEINR.[F]	R	1xAcetyl:2H(3) [K5]	P11586 1xAcetyl:2H(3) [K504]	FALSE	0.000133342	0	1	1	6	P11586	P11586 [500-517]	0	2090.07	0	1.009	0.248	2.061	0.900114	0.635511	0.267996	0	0	0	92.6	93.5	22.9	190.9		High	High	Peak Found	High	High	0	5.058e-06	6.09	44.63
FALSE	High	[R].SNPKLKDLYIRPNIAQKR.[M]	R	3xAcetyl:2H(3) [K4; K6; K17]; 1xAcetyl:2H(3) [N-Term]	Q9Y5B9 3xAcetyl:2H(3) [K661; K663; K674]; 1xAcetyl:2H(3) [N-Term]	FALSE	0.00123448	0	1	1	8	Q9Y5B9	Q9Y5B9 [658-675]	0	2334.37	0	0.329	0.241	0.377	0.281355	0.133209	0.326137	0	0	0	205.4	67.6	49.6	77.4		High	Peak Found	Peak Found	High	High	0	0.0003375	3.68	51.92
FALSE	High	[E].IGGSEAPAPQNKDQKAVDPEDDFQR.[E]	E	2xAcetyl:2H(3) [K12; K15]; 1xAcetyl:2H(3) [N-Term]	Q99848 2xAcetyl:2H(3) [K91; K94]; 1xAcetyl:2H(3) [N-Term]	FALSE	0.00129634	0	1	1	6	Q99848	Q99848 [80-104]	0	2847.37	0	100	100	100	4.34403e-17	3.7678e-17	4.94188e-17					141.5	199.4	59.1		Not Found	Peak Found	High	Peak Found	High	0	5.845e-06	2.47	44.91
FALSE	High	[R].LGGIAYFLSR.[L]	R	1xAcetyl:2H(3) [N-Term]	Q9H2U1 1xAcetyl:2H(3) [N-Term]	FALSE	0.0279792	0	1	1	2	Q9H2U1	Q9H2U1 [648-657]	0	1141.64	0	0.523	0.01	1.329	0.960927	3.7678e-17	0.825281	0		0	140.2	73.4		186.3		Peak Found	Peak Found	Not Found	High	High	0	0.0011	2.8	81.09
FALSE	High	[R].IGGGIDVPVPR.[H]	R			FALSE	0.0193364	0	1	1	2	Q92945	Q92945 [321-331]	0	1079.62	0	1.111	0.319	2.342	0.852422	0.756716	0.1629	0	0	0	83.8	93.1	26.7	196.3		High	Peak Found	Peak Found	Peak Found	High	0	0.0007248	3.87	37.64
FALSE	High	[R].SNPYYIVKQGKINQMATAPDSQR.[L]	R	2xAcetyl:2H(3) [K8; K11]; 1xAcetyl:2H(3) [N-Term]	Q9UQE7 2xAcetyl:2H(3) [K140; K143]; 1xAcetyl:2H(3) [N-Term]	FALSE	0.00825057	0	1	1	4	Q9UQE7	Q9UQE7 [133-155]	0	2744.4	0	0.01	0.01	0.01	4.34403e-17	3.7678e-17	4.94188e-17				400					High	Not Found	Not Found	Not Found	High	0	0.0001358	2.94	59.32
FALSE	High	[R].LGFSEVELVQMVVDGVKLLIEMEQR.[L]	R	2xOxidation [M11; M22]; 1xAcetyl:2H(3) [K17]	P12277 2xOxidation [M352; M363]; 1xAcetyl:2H(3) [K358]	FALSE	0.0131874	0	1	1	1	P12277	P12277 [342-366]	0	2938.53	0	0.01	0.01	0.01	4.34403e-17	3.7678e-17	4.94188e-17				400					High	Not Found	Not Found	Not Found	High	0	0.0003035	4.44	101.78
FALSE	High	[F].SNSADDIKSKKKR.[E]	F	4xAcetyl:2H(3) [K8; K10; K11; K12]; 1xAcetyl:2H(3) [N-Term]	P45973 4xAcetyl:2H(3) [K102; K104; K105; K106]; 1xAcetyl:2H(3) [N-Term]	FALSE	0.0210499	0	1	1	1	P45973	P45973 [95-107]	0	1701.96	0	0.569	0.466	0.732	0.958208	0.944796	0.985609	0	0	0	144.5	82.3	67.3	105.8		Peak Found	High	Peak Found	Peak Found	High	0	0.0006757	2.89	33.46
FALSE	High	[E].LGELEAKLNENLR.[R]	E	1xAcetyl:2H(3) [K7]; 1xAcetyl:2H(3) [N-Term]	Q9UQE7 1xAcetyl:2H(3) [K695]; 1xAcetyl:2H(3) [N-Term]	FALSE	0.00734783	0	1	1	2	Q9UQE7	Q9UQE7 [689-701]	0	1588.88	0	100	100	100	4.34403e-17	3.7678e-17	4.94188e-17					36.9	26	337.2		Not Found	High	Peak Found	Peak Found	High	0	0.0001935	4.1	75.91
FALSE	High	[R].IGEKYVDMSVKTKIQKLGR.[A]	R	4xAcetyl:2H(3) [K4; K11; K13; K16]	P48047 4xAcetyl:2H(3) [K192; K199; K201; K204]	FALSE	0.0059711	0	1	1	4	P48047	P48047 [189-207]	0	2373.36	0	0.336	0.259	0.463	0.723655	0.772668	0.806598	0	0	0	194.3	65.4	50.3	90.1		High	Peak Found	Peak Found	Peak Found	High	0	7.812e-05	4.42	61.55
FALSE	High	[R].LGDVISIQPCPDVKYGKR.[I]	R	1xCarbamidomethyl [C10]; 2xAcetyl:2H(3) [K14; K17]	P55072 1xCarbamidomethyl [C105]; 2xAcetyl:2H(3) [K109; K112]	FALSE	0.000729742	0	1	1	2	P55072	P55072 [96-113]	0	2135.14	0	0.01	0.01	0.01	4.34403e-17	3.7678e-17	4.94188e-17				400					High	Not Found	Not Found	Not Found	High	0.0001879	0.003254	3.47	47.25
FALSE	High	[R].LGDLYEEEMR.[E]	R			FALSE	0.0183087	0	1	1	14	P08670	P08670 [146-155]	0	1254.57	0	0.095	0.132	0.068	0.000166145	0.00151016	4.96412e-07	0	0	0	308.8	29.3	40.9	21		High	High	High	Peak Found	High	0.0002176	0.003759	3.58	35.4
FALSE	High	[E].LGDLVKSVDPTLALSVYLR.[A]	E	1xAcetyl:2H(3) [K6]; 1xAcetyl:2H(3) [N-Term]	Q00610 1xAcetyl:2H(3) [K468]; 1xAcetyl:2H(3) [N-Term]	FALSE	0.0040891	0	1	1	3	Q00610	Q00610 [463-481]	0	2149.24	0			100			4.94188e-17							400		Not Found	Not Found	Not Found	High	High	0	6.994e-05	3.86	91.56
FALSE	High	[E].IGAEEAEEVGVEHLLR.[D]	E	1xAcetyl:2H(3) [N-Term]	P51665 1xAcetyl:2H(3) [N-Term]	FALSE	0.000245765	0	1	1	6	P51665	P51665 [162-177]	0	1795.93	0	53.446	54.903	68.797	1.00217e-06	0.00143726	3.86101e-10	0	0	0	2.2	120	123.3	154.5		Peak Found	Peak Found	High	High	High	0	7.497e-06	5.97	57.11
FALSE	High	[E].IFPLETPAFAIKEQGFR.[A]	E	1xAcetyl:2H(3) [K12]; 1xAcetyl:2H(3) [N-Term]	P49915 1xAcetyl:2H(3) [K65]; 1xAcetyl:2H(3) [N-Term]	FALSE	4.24995e-05	0	1	1	9	P49915	P49915 [54-70]	0	2054.12	0	3.645	8.03	13.302	0.204151	0.149151	0.000989291	0	0	0	15.4	56.1	123.6	204.8		Peak Found	High	High	High	High	0	1.739e-08	3.97	81.79
FALSE	High	[E].LFLDDGHTFNYQTR.[Q]	E	1xAcetyl:2H(3) [N-Term]	Q14697 1xAcetyl:2H(3) [N-Term]	FALSE	0.00589864	0	1	1	1	Q14697	Q14697 [844-857]	0	1771.85	0	100	100	100	4.34403e-17	3.7678e-17	4.94188e-17					166.9	87.1	146.1		Not Found	Peak Found	Peak Found	High	High	0	7.705e-05	4.75	57.27
FALSE	High	[E].LFEFKGEDLTEEEDGGIIR.[R]	E	1xAcetyl:2H(3) [K5]; 1xAcetyl:2H(3) [N-Term]	Q02790 1xAcetyl:2H(3) [K138]; 1xAcetyl:2H(3) [N-Term]	FALSE	0.00448145	0	1	1	8	Q02790	Q02790 [134-152]	0	2287.12	0	28.159	68.861	83.903	6.12529e-05	0.00300302	2.10214e-10	0	0	0	2.2	61.9	151.4	184.5		Peak Found	High	High	High	High	0	0.0005834	4.19	73.81
FALSE	High	[L].SNTTAIAEAWAR.[L]	L	1xAcetyl:2H(3) [N-Term]	Q13748 1xAcetyl:2H(3) [N-Term]; Q6PEY2 1xAcetyl:2H(3) [N-Term]; Q71U36 1xAcetyl:2H(3) [N-Term]; Q9NY65 1xAcetyl:2H(3) [N-Term]; P68363 1xAcetyl:2H(3) [N-Term]; P68366 1xAcetyl:2H(3) [N-Term]	FALSE	0.0105924	0	2	6	6	Q13748; P68363	Q13748 [379-390]; Q6PEY2 [379-390]; Q71U36 [379-390]; Q9NY65 [379-390]; P68363 [379-390]; P68366 [379-390]	0	1335.67	0	100	100	100	4.34403e-17	3.7678e-17	4.94188e-17					119.4	101.6	179	Shared	Not Found	High	Peak Found	High	High	0	0.000208	3.38	47.92
FALSE	High	[E].IEVLVDADPVVDSSQKR.[Y]	E	1xAcetyl:2H(3) [K16]; 1xAcetyl:2H(3) [N-Term]	O00154 1xAcetyl:2H(3) [K321]; 1xAcetyl:2H(3) [N-Term]	FALSE	0.000682282	0	1	1	1	O00154	O00154 [306-322]	0	1960.05	0	14.955	16.096	31.271	0.000900355	0.0406986	4.70521e-06	0	0	0	6.3	94.5	101.7	197.5		Peak Found	Peak Found	High	Peak Found	High	0	1.954e-06	3.92	67.97
FALSE	High	[R].SNVTAVHKANIMR.[M]	R	1xAcetyl:2H(3) [K8]; 1xAcetyl:2H(3) [N-Term]	P50213 1xAcetyl:2H(3) [K200]; 1xAcetyl:2H(3) [N-Term]	FALSE	0.00252358	0	1	1	14	P50213	P50213 [193-205]	0	1530.83	0	0.826	1.062	0.799	0.994056	0.878498	0.99558	0	0	0	108.5	89.6	115.2	86.7		High	High	High	High	High	0	2.687e-05	4.89	33.08
FALSE	High	[E].IETVQKETIHPR.[K]	E	1xAcetyl:2H(3) [K6]; 1xAcetyl:2H(3) [N-Term]	Q6P2Q9 1xAcetyl:2H(3) [K1611]; 1xAcetyl:2H(3) [N-Term]	FALSE	0.0147127	0	1	1	2	Q6P2Q9	Q6P2Q9 [1606-1617]	0	1540.86	0	100	100	100	4.34403e-17	3.7678e-17	4.94188e-17					188.1	58.3	153.6		Not Found	Peak Found	High	Peak Found	High	0.0002176	0.006103	3.65	38.89
FALSE	High	[R].IESLSSQLSNLQKESR.[A]	R	1xAcetyl:2H(3) [K13]	P20700 1xAcetyl:2H(3) [K312]	FALSE	0.000725295	0	1	1	1	P20700	P20700 [300-315]	0	1863.98	0	0.091	0.036	0.415	0.0485208	0.0574798	0.769998	0	0	0	259.5	23.6	9.2	107.7		Peak Found	Peak Found	Peak Found	High	High	0	2.178e-06	4.75	46.04
FALSE	High	[R].IGMVVKTGVVPQLVKLLGASELPIVTPALR.[A]	R	2xAcetyl:2H(3) [K6; K15]	P52292 2xAcetyl:2H(3) [K291; K300]	FALSE	0.00142081	0	1	1	2	P52292	P52292 [286-315]	0	3188.93	0	100	100	100	4.34403e-17	3.7678e-17	4.94188e-17					342.8	28.2	29		Not Found	High	Peak Found	Peak Found	High	0	6.789e-06	4.11	89.86
FALSE	High	[R].IGNAKGDDALEKR.[F]	R	2xAcetyl:2H(3) [K5; K12]	Q9Y617 2xAcetyl:2H(3) [K311; K318]	FALSE	0.00278275	0	1	1	8	Q9Y617	Q9Y617 [307-319]	0	1476.79	0	0.295	0.474	0.387	0.133477	0.510209	0.279739	0	0	0	185.6	54.8	87.9	71.7		High	High	High	High	High	0	5.912e-05	4.17	25.77
FALSE	High	[E].IGNIISDAMKKVGR.[K]	E	2xAcetyl:2H(3) [K10; K11]; 1xAcetyl:2H(3) [N-Term]	P10809 2xAcetyl:2H(3) [K191; K192]; 1xAcetyl:2H(3) [N-Term]	FALSE	0.000220151	0	1	1	35	P10809	P10809 [182-195]	0	1636.94	0	20.845	28.562	40.445	4.22674e-05	0.000281065	8.43224e-14	0	0	0	4.4	91.8	125.8	178.1		Peak Found	High	High	High	High	0	0.0001382	4.43	85.03
FALSE	High	[E].IGQTLDLLTAPQGNVDLVR.[F]	E	1xAcetyl:2H(3) [N-Term]	P14324 1xAcetyl:2H(3) [N-Term]	FALSE	0.000264476	0	1	1	4	P14324	P14324 [235-253]	0	2068.15	0	34.488	35.6	22.54	6.83196e-06	0.00108984	6.61367e-05	0	0	0	4.3	147.3	152.1	96.3		Peak Found	High	High	High	High	0	3.916e-07	3.7	72.18
FALSE	High	[E].IKTLEEDEEELFKMR.[A]	E	2xAcetyl:2H(3) [K2; K13]; 1xAcetyl:2H(3) [N-Term]	P43487 2xAcetyl:2H(3) [K39; K50]; 1xAcetyl:2H(3) [N-Term]	FALSE	0.000253395	0	1	1	25	P43487	P43487 [38-52]	0	2045.05	0	11.794	16.016	12.363	1.77752e-06	9.25995e-08	1.98438e-08	0	0	0	9.7	114.6	155.6	120.1		High	High	High	High	High	0	2.335e-05	4.61	79.95
FALSE	High	[K].LKPEDITQIQPQQLVLR.[L]	K	1xAcetyl:2H(3) [K2]; 1xAcetyl:2H(3) [N-Term]	P05556 1xAcetyl:2H(3) [K107]; 1xAcetyl:2H(3) [N-Term]	FALSE	9.70243e-05	0	1	1	10	P05556	P05556 [106-122]	0	2109.22	0	1.154	0.474	1.1	0.82827	0.876873	0.900158	0	0	0	107.3	123.8	50.8	118.1		High	High	Peak Found	Peak Found	High	6.911e-05	0.001633	3.92	66.64
FALSE	High	[E].LKMWDPHNDPNAQGDAFKTLFVAR.[V]	E	2xAcetyl:2H(3) [K2; K18]; 1xAcetyl:2H(3) [N-Term]	P08621 2xAcetyl:2H(3) [K87; K103]; 1xAcetyl:2H(3) [N-Term]	FALSE	0.00173831	0	1	1	4	P08621	P08621 [86-109]	0	2906.46	0		100	100		3.7678e-17	4.94188e-17						23.1	376.9		Not Found	Not Found	Peak Found	High	High	0	9.595e-06	4.45	74.13
FALSE	High	[E].SNAIAYYVSNEELR.[G]	E	1xAcetyl:2H(3) [N-Term]	P26641 1xAcetyl:2H(3) [N-Term]	FALSE	0.000931895	0	1	1	50	P26641	P26641 [72-85]	0	1673.82	0	29.388	36.689	26.25	6.21571e-11	3.94206e-12	3.78028e-13	0	0	0	4.3	126	157.2	112.5		Peak Found	High	High	High	High	0	1.094e-05	4.42	57.69
FALSE	High	[E].LKLIGEYGLR.[N]	E	1xAcetyl:2H(3) [K2]; 1xAcetyl:2H(3) [N-Term]	P46781 1xAcetyl:2H(3) [K30]; 1xAcetyl:2H(3) [N-Term]	FALSE	0.0229138	0	1	1	3	P46781	P46781 [29-38]	0	1251.76	0	100	100		4.34403e-17	3.7678e-17						238.5	161.5			Not Found	High	Peak Found	Not Found	High	0.0006112	0.01101	3.06	70.68
FALSE	High	[R].SNFGYNIPLKHLADR.[V]	R	1xAcetyl:2H(3) [K10]; 1xAcetyl:2H(3) [N-Term]	P25788 1xAcetyl:2H(3) [K110]; 1xAcetyl:2H(3) [N-Term]	FALSE	0.00121948	0	1	1	5	P25788	P25788 [101-115]	0	1834.97	0	1.591	2.201	0.538	0.54786	0.418211	0.886028	0	0	0	75	119.4	165.2	40.4		High	High	High	Peak Found	High	0	5.246e-06	5.13	54.49
FALSE	High	[EQRT].LKILDFGLAR.[HRTQ]	E	1xAcetyl:2H(3) [K2]; 1xAcetyl:2H(3) [N-Term]	O15264 1xAcetyl:2H(3) [K165]; 1xAcetyl:2H(3) [N-Term]; Q32MK0 1xAcetyl:2H(3) [K653]; 1xAcetyl:2H(3) [N-Term]; Q15746 1xAcetyl:2H(3) [K1602]; 1xAcetyl:2H(3) [N-Term]; Q86YV6 1xAcetyl:2H(3) [K244]; 1xAcetyl:2H(3) [N-Term]; P45984 1xAcetyl:2H(3) [K166]; 1xAcetyl:2H(3) [N-Term]; P53778 1xAcetyl:2H(3) [K168]; 1xAcetyl:2H(3) [N-Term]; P53779 1xAcetyl:2H(3) [K204]; 1xAcetyl:2H(3) [N-Term]; Q16539 1xAcet…	FALSE	0.00600766	0	1	9	120	Q15746	O15264 [164-173]; Q32MK0 [652-661]; Q15746 [1601-1610]; Q86YV6 [243-252]; P45984 [165-174]; P53778 [167-176]; P53779 [203-212]; Q16539 [164-173]; P45983 [165-174]	0	1235.76	0	48.696	55.315	42.021	1.33862e-06	0.00382572	6.22283e-06	0	0	0	2.7	132.5	150.5	114.3		Peak Found	High	High	High	High	0	0.000183	4.48	80.35
FALSE	High	[E].LKEVFEDAAEIR.[L]	E	1xAcetyl:2H(3) [K2]; 1xAcetyl:2H(3) [N-Term]	P19338 1xAcetyl:2H(3) [K410]; 1xAcetyl:2H(3) [N-Term]	FALSE	0.00143829	0	1	1	21	P19338	P19338 [409-420]	0	1509.81	0	40.452	39.021	31.13	1.33375e-09	4.5773e-07	3.00706e-09	0	0	0	3.6	145	139.9	111.6		Peak Found	High	High	High	High	0	7.405e-05	3.27	75.44
FALSE	High	[H].LKEDQTEYLEER.[RW]	H	1xAcetyl:2H(3) [K2]	P07900 1xAcetyl:2H(3) [K191]; P08238 1xAcetyl:2H(3) [K186]; Q58FF6 1xAcetyl:2H(3) [K161]; Q58FF7 1xAcetyl:2H(3) [K165]	FALSE	0.00442704	0	2	4	2	P07900; P08238	P07900 [190-201]; P08238 [185-196]; Q58FF6 [160-171]; Q58FF7 [164-175]	0	1597.78	0	0.703	0.253	1.604	0.994056	0.733437	0.680967	0	0	0	112.4	79	28.4	180.2	Shared	Peak Found	Peak Found	Peak Found	High	High	0	4.704e-05	4.19	31.53
FALSE	High	[R].SNGAIQKIVAFENAFER.[L]	R	1xAcetyl:2H(3) [K7]; 1xAcetyl:2H(3) [N-Term]	O60763 1xAcetyl:2H(3) [K202]; 1xAcetyl:2H(3) [N-Term]	FALSE	0.00670524	0	1	1	1	O60763	O60763 [196-212]	0	1984.04	0	0.046	0.01	1.04	0.019545	3.7678e-17	0.942957	0		0	191.7	8.9		199.4		Peak Found	Peak Found	Not Found	High	High	0	9.576e-05	2.77	81.04
FALSE	High	[E].LKAEKDNAEIR.[V]	E	2xAcetyl:2H(3) [K2; K5]; 1xAcetyl:2H(3) [N-Term]	Q99832 2xAcetyl:2H(3) [K247; K250]; 1xAcetyl:2H(3) [N-Term]	FALSE	0.00978593	0	1	1	57	Q99832	Q99832 [246-256]	0	1421.79	0	25.296	28.37	24.546	4.11005e-10	1.15421e-10	1.10449e-12	0	0	0	5	127.7	143.3	124		Peak Found	High	High	High	High	0.0002176	0.004458	3.52	38.66
FALSE	High	[R].LLAEPVPGIKAEPDESNAR.[Y]	R	1xAcetyl:2H(3) [K10]	Q5JXB2 1xAcetyl:2H(3) [K24]; P61088 1xAcetyl:2H(3) [K24]	FALSE	4.35518e-05	0	1	2	6	Q5JXB2	Q5JXB2 [15-33]; P61088 [15-33]	0	2051.08	0	0.283	0.098	0.526	0.693632	0.346681	0.870701	0	0	0	209.7	59.4	20.6	110.3		High	Peak Found	Peak Found	Peak Found	High	0	1.397e-07	4.83	41.82
FALSE	High	[F].SNHKELKTDSSPNQAR.[A]	F	2xAcetyl:2H(3) [K4; K7]; 1xAcetyl:2H(3) [N-Term]	P26599 2xAcetyl:2H(3) [K134; K137]; 1xAcetyl:2H(3) [N-Term]	FALSE	0.00840287	0	1	1	4	P26599	P26599 [131-146]	0	1946.99	0	0.682	0.134	0.618	0.994056	0.449732	0.942934	0	0	0	164.4	112	22	101.6		Peak Found	Peak Found	High	High	High	0.0001879	0.003216	4.82	22.32
FALSE	High	[S].LHTDGDKAFVDFLSDEIKEER.[K]	S	2xAcetyl:2H(3) [K7; K18]	Q07021 2xAcetyl:2H(3) [K80; K91]	FALSE	0.00114018	0	1	1	1	Q07021	Q07021 [74-94]	0	2554.26	0		100	100		3.7678e-17	4.94188e-17						168.5	231.5		Not Found	Not Found	High	Peak Found	High	0	4.675e-06	4.76	64.91
FALSE	High	[E].LHSRPEQDKFSQAAKVAELEKR.[L]	E	3xAcetyl:2H(3) [K9; K15; K21]; 1xAcetyl:2H(3) [N-Term]	Q13561 3xAcetyl:2H(3) [K217; K223; K229]; 1xAcetyl:2H(3) [N-Term]	FALSE	6.84723e-05	0	1	1	17	Q13561	Q13561 [209-230]	0	2747.49	0	23.291	26.601	13.568	1.81041e-06	1.57152e-05	0.000138235	0	0	0	6.2	144.5	165.1	84.2		Peak Found	High	High	High	High	0	3.928e-08	6.06	48.05
FALSE	High	[R].SNLPAKAIGHR.[I]	R	1xAcetyl:2H(3) [K6]; 1xAcetyl:2H(3) [N-Term]	P18077 1xAcetyl:2H(3) [K95]; 1xAcetyl:2H(3) [N-Term]	FALSE	0.025245	0	1	1	2	P18077	P18077 [90-100]	0	1253.72	0	0.499	0.396	0.923	0.637673	0.317041	0.942957	0	0	0	141.9	70.9	56.2	131		High	Peak Found	High	Peak Found	High	0.0001879	0.002692	3.41	33.33
FALSE	High	[H].LHIKEKGKPLMLNPR.[T]	H	1xOxidation [M11]; 3xAcetyl:2H(3) [K4; K6; K8]; 1xAcetyl:2H(3) [N-Term]	P23368 1xOxidation [M29]; 3xAcetyl:2H(3) [K22; K24; K26]; 1xAcetyl:2H(3) [N-Term]	FALSE	0.00155723	0	1	1	2	P23368	P23368 [19-33]	0	1970.16	0	2.073	0.275	1.665	0.482711	0.818542	0.661829	0	0	0	79.8	165.4	22	132.8		Peak Found	High	Peak Found	Peak Found	High	0	4.341e-05	4.87	49.68
FALSE	High	[H].LHIKEKGKPLMLNPR.[T]	H	3xAcetyl:2H(3) [K4; K6; K8]; 1xAcetyl:2H(3) [N-Term]	P23368 3xAcetyl:2H(3) [K22; K24; K26]; 1xAcetyl:2H(3) [N-Term]	FALSE	0.000181027	0	1	1	3	P23368	P23368 [19-33]	0	1954.17	0	0.488	0.034	0.851	0.843157	0.012506	0.985609	0	0	0	168.5	82.2	5.8	143.4		Peak Found	High	Peak Found	High	High	0	4.057e-07	5.63	53.97
FALSE	High	[G].LHHKAVLAVR.[R]	G	1xAcetyl:2H(3) [K4]; 1xAcetyl:2H(3) [N-Term]	Q9UDR5 1xAcetyl:2H(3) [K23]; 1xAcetyl:2H(3) [N-Term]	FALSE	0.0288376	0	1	1	2	Q9UDR5	Q9UDR5 [20-29]	0	1233.77	0	3.586	5.133	3.819	0.165469	0.235614	0.110294	0	0	0	29.5	106	151.7	112.8		Peak Found	High	Peak Found	Peak Found	High	0.0008295	0.01379	3.24	28.82
FALSE	High	[Q].LHHALMPHGKGGR.[S]	Q	1xAcetyl:2H(3) [K10]; 1xAcetyl:2H(3) [N-Term]	Q16795 1xAcetyl:2H(3) [K45]; 1xAcetyl:2H(3) [N-Term]	FALSE	0.0300832	0	1	1	2	Q16795	Q16795 [36-48]	0	1500.81	0	1.039	1.318	0.622	0.87306	0.868744	0.942432	0	0	0	100.5	104.5	132.5	62.5		Peak Found	High	Peak Found	Peak Found	High	0	0.001251	3.04	22.27
FALSE	High	[R].LHGLDEEAEQKLFSEKR.[V]	R	2xAcetyl:2H(3) [K11; K16]	P33991 2xAcetyl:2H(3) [K439; K444]	FALSE	2.65404e-05	0	1	1	3	P33991	P33991 [429-445]	0	2119.09	0	0.448	0.01	0.5	0.85351	3.7678e-17	0.863761	0		0	205.4	91.9		102.6		High	Peak Found	Not Found	Peak Found	High	0	7.849e-09	5.89	47.8
FALSE	High	[R].LHFFMPGFAPLTSR.[G]	R			FALSE	0.00739279	0	3	8	8	Q9BUF5; Q3ZCM7; P07437	Q13885 [263-276]; P04350 [263-276]; A6NNZ2 [263-276]; Q9BUF5 [263-276]; Q3ZCM7 [263-276]; P07437 [263-276]; P68371 [263-276]; Q9BVA1 [263-276]	0	1620.84	0	0.561	0.379	0.59	0.91679	0.748342	0.90318	0	0	0	158.1	88.7	59.9	93.3	Shared	High	High	Peak Found	High	High	0.0002176	0.006736	4.03	59.8
FALSE	High	[H].SNNKAMTTGAIAAMLSTILYSR.[R]	H	1xAcetyl:2H(3) [K4]; 1xAcetyl:2H(3) [N-Term]	P20618 1xAcetyl:2H(3) [K109]; 1xAcetyl:2H(3) [N-Term]	FALSE	0.00743802	0	1	1	3	P20618	P20618 [106-127]	0	2404.25	0	0.332	0.01	0.385	0.805049	3.7678e-17	0.697735	0		0	233	77.5		89.6		High	Peak Found	Not Found	Peak Found	High	0.0001346	0.002574	4.04	93.59
FALSE	High	[T].LGSATALMIR.[E]	T	1xAcetyl:2H(3) [N-Term]	Q9Y399 1xAcetyl:2H(3) [N-Term]	FALSE	0.016215	0	1	1	23	Q9Y399	Q9Y399 [41-50]	0	1077.62	0	1.024	1.442	0.703	0.895407	0.83616	0.985909	0	0	0	95.9	98.3	138.3	67.4		High	High	High	High	High	6.911e-05	0.001817	3.31	57.67
FALSE	High	[S].LHTDGDKAFVDFLSDEIKEER.[K]	S	2xAcetyl:2H(3) [K7; K18]; 1xAcetyl:2H(3) [N-Term]	Q07021 2xAcetyl:2H(3) [K80; K91]; 1xAcetyl:2H(3) [N-Term]	FALSE	3.55937e-05	0	1	1	47	Q07021	Q07021 [74-94]	0	2599.29	0	0.341	0.576	0.621	0.228929	0.746282	0.862459	0	0	0	157.6	53.8	90.8	97.8		High	High	High	High	High	0	2.579e-08	6.78	71.99
FALSE	High	[R].SLLVIPNTLAVNAAQDSTDLVAKLR.[A]	R	1xAcetyl:2H(3) [K23]; 1xAcetyl:2H(3) [N-Term]	P17987 1xAcetyl:2H(3) [K466]; 1xAcetyl:2H(3) [N-Term]	FALSE	0.0106571	0	1	1	6	P17987	P17987 [444-468]	0	2712.54	0	2.968	3.93	2.72	0.110094	0.0488917	0.116304	0	0	0	37.7	111.8	148	102.5		High	High	High	High	High	0.0002176	0.005157	3.12	92.06
FALSE	High	[R].KMDETDASSAVKVKR.[A]	R	3xAcetyl:2H(3) [K1; K12; K14]	Q13148 3xAcetyl:2H(3) [K84; K95; K97]	FALSE	0.000276042	0	1	1	1	Q13148	Q13148 [84-98]	0	1799.95	0														No Quan Values	High	Not Found	Not Found	Not Found	High	0	4.204e-07	4.76
FALSE	High	[E].KLKTDIKVVDR.[D]	E	3xAcetyl:2H(3) [K1; K3; K7]; 1xAcetyl:2H(3) [N-Term]	P09874 3xAcetyl:2H(3) [K796; K798; K802]; 1xAcetyl:2H(3) [N-Term]	FALSE	0.00861031	0	1	1	3	P09874	P09874 [796-806]	0	1494.93	0	100	100	100	4.34403e-17	3.7678e-17	4.94188e-17					132.4	185.4	82.2		Not Found	High	Peak Found	High	High	0	0.000146	3.42	51.04
FALSE	High	[R].GGHIAKDCKEPKR.[E]	R	1xCarbamidomethyl [C8]; 3xAcetyl:2H(3) [K6; K9; K12]; 1xAcetyl:2H(3) [N-Term]	P62633 1xCarbamidomethyl [C87]; 3xAcetyl:2H(3) [K85; K88; K91]; 1xAcetyl:2H(3) [N-Term]	FALSE	0.0140143	0	1	1	2	P62633	P62633 [80-92]	0	1675.9	0	0.611	0.519	0.325	0.96849	0.964539	0.513948	0	0	0	162.9	99.5	84.6	53		High	Peak Found	Peak Found	High	High	0	0.0003382	4.36	23.77
FALSE	High	[M].GGEEKPIGAGEEKQKEGGKKKNKEGSGDGGR.[A]	M	7xAcetyl:2H(3) [K5; K13; K15; K19; K20; K21; K23]; 1xAcetyl:2H(3) [N-Term]	P26639 7xAcetyl:2H(3) [K18; K26; K28; K32; K33; K34; K36]; 1xAcetyl:2H(3) [N-Term]	FALSE	6.68179e-05	0	1	1	18	P26639	P26639 [14-44]	0	3501.82	0	0.452	0.549	0.496	0.849179	0.946606	0.848385	0	0	0	160.1	72.4	88	79.5		High	High	High	High	High	0	3.773e-08	4.68	37.13
FALSE	High	[E].GFVIANDVDNKR.[C]	E	1xAcetyl:2H(3) [K11]; 1xAcetyl:2H(3) [N-Term]	Q08J23 1xAcetyl:2H(3) [K219]; 1xAcetyl:2H(3) [N-Term]	FALSE	0.00840287	0	1	1	4	Q08J23	Q08J23 [209-220]	0	1437.76	0	34.918	29.368	27.566	6.54125e-12	7.43593e-11	1.70517e-13	0	0	0	4.3	150.4	126.5	118.8		Peak Found	High	High	High	High	0	0.0002481	4.6	49.63
FALSE	High	[M].GFVKVVKNKAYFKR.[Y]	M	4xAcetyl:2H(3) [K4; K7; K9; K13]; 1xAcetyl:2H(3) [N-Term]	P46777 4xAcetyl:2H(3) [K5; K8; K10; K14]; 1xAcetyl:2H(3) [N-Term]	FALSE	0.000384034	0	1	1	32	P46777	P46777 [2-15]	0	1909.15	0	0.51	1.249	1.037	0.663681	0.722152	0.867495	0	0	0	105.4	53.8	131.6	109.3		High	High	High	High	High	0	1.362e-05	4.77	68.13
FALSE	High	[E].GFLLDKKIGVNQPKR.[I]	E	3xAcetyl:2H(3) [K6; K7; K14]; 1xAcetyl:2H(3) [N-Term]	P78371 3xAcetyl:2H(3) [K222; K223; K230]; 1xAcetyl:2H(3) [N-Term]	FALSE	0.000892859	0	1	1	28	P78371	P78371 [217-231]	0	1893.13	0	100	100	100	4.34403e-17	3.7678e-17	4.94188e-17					196.1	112.1	91.8		Not Found	High	High	High	High	0	3.105e-06	4.54	64.38
FALSE	High	[E].SYEVFKDLFDPIIEDR.[H]	E	1xAcetyl:2H(3) [K6]; 1xAcetyl:2H(3) [N-Term]	P12277 1xAcetyl:2H(3) [K86]; 1xAcetyl:2H(3) [N-Term]	FALSE	0.000327589	0	1	1	5	P12277	P12277 [81-96]	0	2076.04	0	18.676	19.446	11.518	3.92057e-05	0.00235657	0.000417174	0	0	0	7.9	147.5	153.6	91		Peak Found	High	High	High	High	0	1.241e-05	4.85	89.67
FALSE	High	[M].SYGRPPPDVEGMTSLKVDNLTYR.[T]	M	1xAcetyl [N-Term]; 1xAcetyl:2H(3) [K16]	Q01130 1xAcetyl [N-Term]; 1xAcetyl:2H(3) [K17]	FALSE	0.000490437	0	1	1	27	Q01130	Q01130 [2-24]	0	2682.33	0	0.976	1.582	0.892	0.895813	0.615001	0.966123	0	0	0	89.9	87.7	142.2	80.2		High	High	High	High	High	0	1.119e-06	4.78	54.7
FALSE	High	[R].GDVVPKDVNAAIATIKTKR.[TS]	R	3xAcetyl:2H(3) [K6; K16; K18]; 1xAcetyl:2H(3) [N-Term]	Q13748 3xAcetyl:2H(3) [K326; K336; K338]; 1xAcetyl:2H(3) [N-Term]; Q6PEY2 3xAcetyl:2H(3) [K326; K336; K338]; 1xAcetyl:2H(3) [N-Term]; Q71U36 3xAcetyl:2H(3) [K326; K336; K338]; 1xAcetyl:2H(3) [N-Term]; P68363 3xAcetyl:2H(3) [K326; K336; K338]; 1xAcetyl:2H(3) [N-Term]; Q9BQE3 3xAcetyl:2H(3) [K326; K336; K338]; 1xAcetyl:2H(3) [N-Term]	FALSE	0.00152893	0	2	5	13	Q13748; P68363	Q13748 [321-339]; Q6PEY2 [321-339]; Q71U36 [321-339]; P68363 [321-339]; Q9BQE3 [321-339]	0	2176.27	0	1.492	1.47	1.314	0.66305	0.79869	0.806598	0	0	0	75.8	113.1	111.5	99.6	Shared	High	High	High	High	High	0	0.0001055	3.67	69.5
FALSE	High	[R].GDVVPKDVNAAIATIKTKR.[TS]	R	3xAcetyl:2H(3) [K6; K16; K18]	Q13748 3xAcetyl:2H(3) [K326; K336; K338]; Q6PEY2 3xAcetyl:2H(3) [K326; K336; K338]; Q71U36 3xAcetyl:2H(3) [K326; K336; K338]; P68363 3xAcetyl:2H(3) [K326; K336; K338]; Q9BQE3 3xAcetyl:2H(3) [K326; K336; K338]	FALSE	9.64328e-05	0	2	5	9	Q13748; P68363	Q13748 [321-339]; Q6PEY2 [321-339]; Q71U36 [321-339]; P68363 [321-339]; Q9BQE3 [321-339]	0	2131.24	0	5.17	1.289	1.514	0.00237999	0.868744	0.692978	0	0	0	44.6	230.5	57.4	67.5	Shared	High	High	Peak Found	High	High	0	4.644e-07	5.33	60.32
FALSE	High	[R].GDLGIEIPAEKVFLAQKMMIGR.[C]	R	2xAcetyl:2H(3) [K11; K17]; 1xAcetyl:2H(3) [N-Term]	P14618 2xAcetyl:2H(3) [K305; K311]; 1xAcetyl:2H(3) [N-Term]; P30613 2xAcetyl:2H(3) [K348; K354]; 1xAcetyl:2H(3) [N-Term]	FALSE	0.0191032	0	1	2	5	P14618	P14618 [295-316]; P30613 [338-359]	0	2551.4	0	0.01	0.01	0.295	4.34403e-17	3.7678e-17	0.453324			0	308.8			91.2		High	Not Found	Not Found	High	High	0	0.0005744	3.81	88.98
FALSE	High	[R].GDGTGGKSIYGER.[F]	R	1xAcetyl:2H(3) [K7]; 1xAcetyl:2H(3) [N-Term]	P23284 1xAcetyl:2H(3) [K116]; 1xAcetyl:2H(3) [N-Term]	FALSE	0.00743802	0	1	1	27	P23284	P23284 [110-122]	0	1386.68	0	0.622	0.584	0.784	0.937856	0.906454	0.99558	0	0	0	133.8	83.2	78.1	104.9		High	High	High	High	High	0.0002705	0.008013	2.8	29.3
FALSE	High	[Y].SDMPPLTLEGIQDR.[V]	Y	1xOxidation [M3]; 1xAcetyl:2H(3) [N-Term]	O14561 1xOxidation [M71]; 1xAcetyl:2H(3) [N-Term]	FALSE	0.0207962	0	1	1	4	O14561	O14561 [69-82]	0	1632.8	0	0.415	0.358	0.462	0.795568	0.745379	0.768141	0	0	0	179	74.2	64.1	82.7		High	Peak Found	Peak Found	Peak Found	High	0	0.0006645	4.06	48.09
FALSE	High	[M].GDAPSPEEKLHLITR.[N]	M	1xAcetyl [N-Term]; 1xAcetyl:2H(3) [K9]	P54577 1xAcetyl [N-Term]; 1xAcetyl:2H(3) [K10]	FALSE	0.00416472	0	1	1	7	P54577	P54577 [2-16]	0	1749.92	0	1.061	0.349	1.203	0.866092	0.212774	0.705885	0	0	0	110.7	117.5	38.6	133.2		High	High	High	High	High	0	0.0001425	4.16	52.05
FALSE	High	[E].GAVVILDAGAQYGKVIDR.[R]	E	1xAcetyl:2H(3) [K14]; 1xAcetyl:2H(3) [N-Term]	P49915 1xAcetyl:2H(3) [K39]; 1xAcetyl:2H(3) [N-Term]	FALSE	0.000690675	0	1	1	1	P49915	P49915 [26-43]	0	1935.08	0		100	100		3.7678e-17	4.94188e-17						228.5	171.5		Not Found	Not Found	Peak Found	High	High	0	1.998e-06	3.35	67.52
FALSE	High	[R].GAVGALLVYDIAKHLTYENVER.[W]	R	1xAcetyl:2H(3) [K13]; 1xAcetyl:2H(3) [N-Term]	P62491 1xAcetyl:2H(3) [K95]; 1xAcetyl:2H(3) [N-Term]; Q15907 1xAcetyl:2H(3) [K95]; 1xAcetyl:2H(3) [N-Term]	FALSE	0.000505662	0	1	2	1	Q15907	P62491 [83-104]; Q15907 [83-104]	0	2521.36	0	0.01	0.01	0.01	4.34403e-17	3.7678e-17	4.94188e-17				400					High	Not Found	Not Found	Not Found	High	0	1.176e-06	4.46	91.25
FALSE	High	[KR].GASQAGMTGYGMPR.[Q]	K	1xAcetyl:2H(3) [N-Term]	Q9UI15 1xAcetyl:2H(3) [N-Term]; P37802 1xAcetyl:2H(3) [N-Term]	FALSE	0.00391794	0	1	2	22	P37802	Q9UI15 [183-196]; P37802 [183-196]	0	1428.64	0	0.448	0.493	0.678	0.745929	0.789928	0.953187	0	0	0	152.7	68.4	75.4	103.5		High	High	High	High	High	0	0.0001954	3.2	35.36
FALSE	High	[R].TAADKDRGEEDADGSKTQDLFR.[R]	R	2xAcetyl:2H(3) [K5; K16]	Q04637 2xAcetyl:2H(3) [K745; K756]	FALSE	0.000187792	0	1	1	1	Q04637	Q04637 [741-762]	1	2515.18	0	0.404	0.153	0.768	0.779448	0.500143	0.994574	0	0	0	172.1	69.5	26.3	132.1		Peak Found	Peak Found	High	Peak Found	High	0	2.184e-07	5.78	35.94
FALSE	High	[C].GAPSATQPATAETQHIADQVR.[S]	C	1xAcetyl:2H(3) [N-Term]	P04080 1xAcetyl:2H(3) [N-Term]	FALSE	0.00219271	0	1	1	1	P04080	P04080 [4-24]	0	2194.09	0	0.806	0.01	0.946	0.957078	3.7678e-17	0.965626	0		0	145.3	117.2		137.5		Peak Found	High	Not Found	Peak Found	High	0	1.428e-05	3.53	37.76
FALSE	High	[R].TADGIVSHLKKQAGPASVPLR.[T]	R	2xAcetyl:2H(3) [K10; K11]; 1xAcetyl:2H(3) [N-Term]	P30101 2xAcetyl:2H(3) [K129; K130]; 1xAcetyl:2H(3) [N-Term]	FALSE	3.9735e-05	0	1	1	7	P30101	P30101 [120-140]	0	2280.3	0	0.291	0.01	0.01	0.482264	3.7678e-17	4.94188e-17	0	0		307.6	89.4	3			High	Peak Found	Peak Found	Not Found	High	0	5.276e-07	6.79	55.13
FALSE	High	[R].TAEEPPQEKAPEPTDAR.[K]	R	1xAcetyl:2H(3) [K9]	O43719 1xAcetyl:2H(3) [K104]	FALSE	0.000191269	0	1	1	11	O43719	O43719 [96-112]	0	1910.92	0	0.702	0.218	1.024	0.998079	0.632324	0.942762	0	0	0	135.9	95.4	29.6	139.1		High	High	High	High	High	0	4.627e-06	4.19	22.6
FALSE	High	[R].GALQNIIPASTGAAKAVGKVIPELNGKLTGMAFR.[V]	R	1xOxidation [M31]; 3xAcetyl:2H(3) [K15; K19; K27]; 1xAcetyl:2H(3) [N-Term]	P04406 1xOxidation [M231]; 3xAcetyl:2H(3) [K215; K219; K227]; 1xAcetyl:2H(3) [N-Term]	FALSE	0.000238365	0	1	1	11	P04406	P04406 [201-234]	0	3590.02	0	0.805	2.593	1.233	0.960927	0.580971	0.885346	0	0	0	71	57.2	184.2	87.6		Peak Found	High	High	High	High	0	5.748e-07	5.64	86.89
FALSE	High	[R].GALQNIIPASTGAAKAVGKVIPELNGKLTGMAFR.[V]	R	3xAcetyl:2H(3) [K15; K19; K27]; 1xAcetyl:2H(3) [N-Term]	P04406 3xAcetyl:2H(3) [K215; K219; K227]; 1xAcetyl:2H(3) [N-Term]	FALSE	4.70319e-06	0	1	1	13	P04406	P04406 [201-234]	0	3574.02	0	1.754	2.08	1.295	0.320305	0.191165	0.605965	0	0	0	65.3	114.5	135.7	84.5		High	High	High	High	High	0	4.104e-10	6.2	90.95
FALSE	High	[R].GALQNIIPASTGAAKAVGKVIPELNGKLTGMAFR.[V]	R	3xAcetyl:2H(3) [K15; K19; K27]	P04406 3xAcetyl:2H(3) [K215; K219; K227]	FALSE	0.0139293	0	1	1	1	P04406	P04406 [201-234]	0	3528.99	0	2.598	4.548	2.049	0.268146	0.300209	0.539298	0	0	0	39.2	101.9	178.4	80.4		Peak Found	High	Peak Found	Peak Found	High	0	0.0003337	4.54	81.81
FALSE	High	[R].SYEDDDDMDLQPNKQKDQHAGAR.[Q]	R	2xAcetyl:2H(3) [K14; K16]; 1xAcetyl:2H(3) [N-Term]	Q9BTE3 2xAcetyl:2H(3) [K180; K182]; 1xAcetyl:2H(3) [N-Term]	FALSE	0.00413936	0	1	1	5	Q9BTE3	Q9BTE3 [167-189]	0	2811.25	0	0.01	0.01	0.01	4.34403e-17	3.7678e-17	4.94188e-17				400					High	Not Found	Not Found	Not Found	High	0	0.0002646	3.5	35.76
FALSE	High	[R].TAKGEKFVMQEEFSR.[D]	R	2xAcetyl:2H(3) [K3; K6]	P30101 2xAcetyl:2H(3) [K332; K335]	FALSE	0.00175969	0	1	1	1	P30101	P30101 [330-344]	0	1876.94	0	0.284	0.01	1.363	0.557951	3.7678e-17	0.817899	0		0	151.1	42.9		206		Peak Found	Peak Found	Not Found	High	High	0	9.855e-06	4.89	46.5
FALSE	High	[R].SVTLLIKGPNKHTLTQIKDAVR.[D]	R	3xAcetyl:2H(3) [K7; K11; K18]; 1xAcetyl:2H(3) [N-Term]	P40227 3xAcetyl:2H(3) [K377; K381; K388]; 1xAcetyl:2H(3) [N-Term]	FALSE	0.000405759	0	1	1	5	P40227	P40227 [371-392]	0	2612.55	0	0.01	0.151	0.637	4.34403e-17	0.291314	0.92321		0	0	223.7		33.7	142.6		High	Not Found	High	High	High	0	1.072e-05	5.31	69.84
FALSE	High	[R].SVSLTGAPESVQKAKMMLDDIVSR.[G]	R	2xAcetyl:2H(3) [K13; K15]; 1xAcetyl:2H(3) [N-Term]	Q92945 2xAcetyl:2H(3) [K203; K205]; 1xAcetyl:2H(3) [N-Term]	FALSE	0.000585579	0	1	1	6	Q92945	Q92945 [191-214]	0	2697.41	0	0.01	0.01	0.202	4.34403e-17	3.7678e-17	0.00964681			0	332.8			67.2		High	Not Found	Not Found	High	High	0	5.403e-05	4.69	86.5
FALSE	High	[M].GIQGLAKLIADVAPSAIR.[E]	M	1xAcetyl:2H(3) [K7]; 1xAcetyl:2H(3) [N-Term]	P39748 1xAcetyl:2H(3) [K8]; 1xAcetyl:2H(3) [N-Term]	FALSE	1.97382e-06	0	1	1	90	P39748	P39748 [2-19]	0	1883.12	0	0.96	1.117	0.966	0.930218	0.839447	0.919342	0	0	0	98.9	95	110.5	95.6		High	High	High	High	High	0	9.55e-08	5.61	91.92
FALSE	High	[M].GLLTILKKMKQKER.[E]	M	1xOxidation [M9]; 4xAcetyl:2H(3) [K7; K8; K10; K12]; 1xAcetyl:2H(3) [N-Term]	P36404 1xOxidation [M10]; 4xAcetyl:2H(3) [K8; K9; K11; K13]; 1xAcetyl:2H(3) [N-Term]	FALSE	0.00208809	0	1	1	6	P36404	P36404 [2-15]	0	1927.19	0	0.809	0.34	0.558	0.960927	0.860769	0.90318	0	0	0	147.8	119.6	50.2	82.4		High	High	Peak Found	Peak Found	High	0	3.69e-05	4.89	71.53
FALSE	High	[M].GLLTILKKMKQKER.[E]	M	4xAcetyl:2H(3) [K7; K8; K10; K12]; 1xAcetyl:2H(3) [N-Term]	P36404 4xAcetyl:2H(3) [K8; K9; K11; K13]; 1xAcetyl:2H(3) [N-Term]	FALSE	4.46301e-05	0	1	1	28	P36404	P36404 [2-15]	0	1911.19	0	0.718	0.823	0.72	0.994056	0.992558	0.969944	0	0	0	122.7	88	100.9	88.4		High	High	High	High	High	0	1.222e-06	5.3	87.51
FALSE	High	[R].GILLYGPPGTGKTLIAR.[A]	R	1xAcetyl:2H(3) [K12]; 1xAcetyl:2H(3) [N-Term]	P55072 1xAcetyl:2H(3) [K251]; 1xAcetyl:2H(3) [N-Term]	FALSE	0.0220957	0	1	1	3	P55072	P55072 [240-256]	0	1817.08	0	0.29	0.157	0.375	0.356204	0.0851667	0.445724	0	0	0	219.5	63.7	34.4	82.4		High	High	Peak Found	Peak Found	High	0	0.000731	4.06	66.98
FALSE	High	[R].GLKMAVTFIGNSTAIQELFKR.[I]	R	1xOxidation [M4]; 2xAcetyl:2H(3) [K3; K20]; 1xAcetyl:2H(3) [N-Term]	P07437 1xOxidation [M363]; 2xAcetyl:2H(3) [K362; K379]; 1xAcetyl:2H(3) [N-Term]	FALSE	2.90898e-05	0	1	1	13	P07437	P07437 [360-380]	0	2475.36	0	1.308	1.873	1.155	0.759506	0.711321	0.902143	0	0	0	75	98.1	140.4	86.6		High	High	High	High	High	0	1.002e-07	5.7	86.28
FALSE	High	[R].GLKMAVTFIGNSTAIQELFKR.[I]	R	2xAcetyl:2H(3) [K3; K20]; 1xAcetyl:2H(3) [N-Term]	P07437 2xAcetyl:2H(3) [K362; K379]; 1xAcetyl:2H(3) [N-Term]	FALSE	4.64602e-06	0	1	1	74	P07437	P07437 [360-380]	0	2459.37	0	0.651	0.617	1.812	0.976309	0.964807	0.450017	0	0	0	98.1	63.8	60.5	177.7		High	High	High	High	High	0	4.08e-06	6.23	96.61
FALSE	High	[L].SVPNVHGALAPLAIPSAAAAAAAAGR.[I]	L	1xAcetyl:2H(3) [N-Term]	P26599 1xAcetyl:2H(3) [N-Term]	FALSE	0.00151036	0	1	1	3	P26599	P26599 [300-325]	0	2369.31	0	100		100	4.34403e-17		4.94188e-17					174.9		225.1		Not Found	High	Not Found	High	High	0	7.55e-06	4.34	60.27
FALSE	High	[E].GIAAGGVMDVNTALQEVLKTALIHDGLAR.[G]	E	1xAcetyl:2H(3) [K19]; 1xAcetyl:2H(3) [N-Term]	P25398 1xAcetyl:2H(3) [K23]; 1xAcetyl:2H(3) [N-Term]	FALSE	0.000197207	0	1	1	5	P25398	P25398 [5-33]	0	3023.65	0	64.861	64.826	96.271	2.39129e-08	5.92372e-05	1.08643e-15	0	0	0	1.8	114.3	114.3	169.7		Peak Found	High	High	High	High	0	1.106e-05	3.95	92.67
FALSE	High	[M].GKVKVGVNGFGR.[I]	M	2xAcetyl:2H(3) [K2; K4]; 1xAcetyl:2H(3) [N-Term]	P04406 2xAcetyl:2H(3) [K3; K5]; 1xAcetyl:2H(3) [N-Term]	FALSE	0.001686	0	1	1	200	P04406	P04406 [2-13]	0	1352.8	0	1.23	1.352	1.184	0.734579	0.623324	0.724088	0	0	0	83.9	103.2	113.5	99.4		High	High	High	High	High	6.911e-05	0.001967	5.13	42.85
FALSE	High	[R].GKSGAALSKKSKGQVKEEGINKSEKR.[M]	R	7xAcetyl:2H(3) [K2; K9; K10; K12; K16; K22; K25]; 1xAcetyl:2H(3) [N-Term]	P09874 7xAcetyl:2H(3) [K498; K505; K506; K508; K512; K518; K521]; 1xAcetyl:2H(3) [N-Term]	FALSE	4.93897e-06	0	1	1	4	P09874	P09874 [497-522]	0	3104.77	0	0.428	0.01	0.348	0.813655	3.7678e-17	0.604419	0		0	225.2	96.4		78.3		High	Peak Found	Not Found	Peak Found	High	0	2.087e-08	6.03	46.48
FALSE	High	[E].GKQAKVLENAEGAR.[T]	E	2xAcetyl:2H(3) [K2; K5]; 1xAcetyl:2H(3) [N-Term]	P38646 2xAcetyl:2H(3) [K73; K76]; 1xAcetyl:2H(3) [N-Term]	FALSE	0.00143829	0	1	1	44	P38646	P38646 [72-85]	0	1605.89	0	52.71	30.482	37.382	1.89204e-14	4.62361e-11	1.08643e-15	0	0	0	3.3	173.4	100.3	123		Peak Found	High	High	High	High	0	3.361e-05	4.66	39.8
FALSE	High	[R].GKLKVLATAFDTTLGGR.[K]	R	2xAcetyl:2H(3) [K2; K4]; 1xAcetyl:2H(3) [N-Term]	P34932 2xAcetyl:2H(3) [K219; K221]; 1xAcetyl:2H(3) [N-Term]	FALSE	0.00674628	0	1	1	3	P34932	P34932 [218-234]	0	1883.09	0	0.821	0.962	1.026	0.960927	0.946606	0.92767	0	0	0	105	86.2	101	107.8		Peak Found	High	High	High	High	0	9.702e-05	4.24	87.25
FALSE	High	[M].GKIALQLKATLENITNLRPVGEDFR.[W]	M	2xAcetyl:2H(3) [K2; K8]; 1xAcetyl:2H(3) [N-Term]	Q9NWV4 2xAcetyl:2H(3) [K3; K9]; 1xAcetyl:2H(3) [N-Term]	FALSE	0.000108977	0	1	1	15	Q9NWV4	Q9NWV4 [2-26]	0	2931.66	0	0.435	0.952	3.167	0.812764	0.95794	0.0204213	0	0	0	72	31.4	68.5	228.1		High	Peak Found	High	High	High	0	8.645e-08	5.82	95.49
FALSE	High	[R].GKGIYLWDVEGR.[K]	R	1xAcetyl:2H(3) [K2]; 1xAcetyl:2H(3) [N-Term]	P04181 1xAcetyl:2H(3) [K66]; 1xAcetyl:2H(3) [N-Term]	FALSE	0.00121205	0	1	1	52	P04181	P04181 [65-76]	0	1482.79	0	0.794	0.66	0.585	0.989475	0.87666	0.806598	0	0	0	131.6	104.5	86.9	77		High	High	High	High	High	0	0.0006453	4.13	61.2
FALSE	High	[E].GKGKDASGNKVKAEPAKIEAFR.[A]	E	5xAcetyl:2H(3) [K2; K4; K10; K12; K17]; 1xAcetyl:2H(3) [N-Term]	P00558 5xAcetyl:2H(3) [K131; K133; K139; K141; K146]; 1xAcetyl:2H(3) [N-Term]	FALSE	0.000578462	0	1	1	5	P00558	P00558 [130-151]	0	2571.44	0	87.163	88.087	48.176	3.83096e-15	3.02599e-10	1.32679e-09	0	0	0	1.8	155.4	157	85.9		Peak Found	High	Peak Found	High	High	0	2.727e-05	4.64	49.71
FALSE	High	[R].GKGGKGLGKGGAKR.[H]	R	4xAcetyl:2H(3) [K2; K5; K9; K13]; 1xAcetyl:2H(3) [N-Term]	P62805 4xAcetyl:2H(3) [K6; K9; K13; K17]; 1xAcetyl:2H(3) [N-Term]	FALSE	0.000269373	0	1	1	74	P62805	P62805 [5-18]	0	1495.92	0	0.907	1.075	0.932	0.960927	0.871623	0.938553	0	0	0	102.2	92.7	109.9	95.3		High	High	High	High	High	0	2.497e-06	5.02	28.79
FALSE	High	[R].GKGGKGLGKGGAKR.[H]	R	1xAcetyl [N-Term]; 4xAcetyl:2H(3) [K2; K5; K9; K13]	P62805 1xAcetyl [N-Term]; 4xAcetyl:2H(3) [K6; K9; K13; K17]	FALSE	0.0176539	0	1	1	6	P62805	P62805 [5-18]	0	1492.9	0	1.068	1.046	1.212	0.87306	0.942748	0.823983	0	0	0	92.5	98.7	96.7	112.1		High	High	High	High	High	0	0.0006019	1.95	28.11
FALSE	High	[R].GKGGKGLGKGGAKR.[H]	R	4xAcetyl:2H(3) [K2; K5; K9; K13]	P62805 4xAcetyl:2H(3) [K6; K9; K13; K17]	FALSE	0.00110586	0	1	1	11	P62805	P62805 [5-18]	0	1450.89	0	1.375	0.659	0.501	0.598237	0.87666	0.610004	0	0	0	113.2	155.6	74.5	56.7		High	High	High	High	High	0	5.032e-05	4.42	23.04
FALSE	High	[R].SVQNHNNKSVNESLNNLFITEEDYQALR.[T]	R	1xAcetyl:2H(3) [K8]; 1xAcetyl:2H(3) [N-Term]	Q00610 1xAcetyl:2H(3) [K1461]; 1xAcetyl:2H(3) [N-Term]	FALSE	0.00966741	0	1	1	3	Q00610	Q00610 [1454-1481]	0	3366.65	0	0.01	0.01	0.107	4.34403e-17	3.7678e-17	0.0562606			0	361.2			38.8		High	Not Found	Not Found	Peak Found	High	0	0.0003654	4.76	61.52
FALSE	High	[M].GKFMKPGKVVLVLAGR.[Y]	M	1xOxidation [M4]; 3xAcetyl:2H(3) [K2; K5; K8]; 1xAcetyl:2H(3) [N-Term]	P61353 1xOxidation [M5]; 3xAcetyl:2H(3) [K3; K6; K9]; 1xAcetyl:2H(3) [N-Term]	FALSE	0.000149769	0	1	1	15	P61353	P61353 [2-17]	0	1896.15	0	0.655	0.616	0.524	0.895407	0.817336	0.665067	0	0	0	143.1	93.8	88.2	74.9		High	High	High	High	High	0	4.991e-07	5.14	68.49
FALSE	High	[M].GKFMKPGKVVLVLAGR.[Y]	M	3xAcetyl:2H(3) [K2; K5; K8]; 1xAcetyl:2H(3) [N-Term]	P61353 3xAcetyl:2H(3) [K3; K6; K9]; 1xAcetyl:2H(3) [N-Term]	FALSE	0.000224227	0	1	1	41	P61353	P61353 [2-17]	0	1880.16	0	0.706	0.926	0.767	0.93734	0.959081	0.986044	0	0	0	117.7	83.1	109	90.3		High	High	High	High	High	0	4.49e-06	4.39	78.02
FALSE	High	[R].GHYTIGKEIVDLVLDR.[I]	R	1xAcetyl [N-Term]; 1xAcetyl:2H(3) [K7]	Q13748 1xAcetyl [N-Term]; 1xAcetyl:2H(3) [K112]; Q6PEY2 1xAcetyl [N-Term]; 1xAcetyl:2H(3) [K112]	FALSE	0.0293651	0	1	2	10	Q13748	Q13748 [106-121]; Q6PEY2 [106-121]	0	1915.04	0	0.495	0.841	0.974	0.895813	0.976288	0.961821	0	0	0	120.8	59.9	101.7	117.7		High	High	High	High	High	0.004501	0.05185	3.74	81.12
FALSE	High	[R].GHYTIGKEIIDLVLDR.[I]	R	1xAcetyl:2H(3) [K7]; 1xAcetyl:2H(3) [N-Term]	Q71U36 1xAcetyl:2H(3) [K112]; 1xAcetyl:2H(3) [N-Term]; P68363 1xAcetyl:2H(3) [K112]; 1xAcetyl:2H(3) [N-Term]; Q9BQE3 1xAcetyl:2H(3) [K112]; 1xAcetyl:2H(3) [N-Term]	FALSE	5.32891e-05	0	1	3	41	P68363	Q71U36 [106-121]; P68363 [106-121]; Q9BQE3 [106-121]	0	1932.07	0	0.542	0.89	0.635	0.735276	0.975986	0.881972	0	0	0	130.4	70.7	116	82.9		High	High	High	High	High	0	2.81e-08	6.07	81.43
FALSE	High	[R].GHLENNPALEKLLPHIR.[G]	R	1xAcetyl:2H(3) [K11]; 1xAcetyl:2H(3) [N-Term]	P05388 1xAcetyl:2H(3) [K77]; 1xAcetyl:2H(3) [N-Term]	FALSE	1.8616e-05	0	1	1	1	P05388	P05388 [67-83]	0	2041.15	0	1.006	1.253	1.447	0.895813	0.88052	0.679978	0	0	0	85	85.5	106.5	123		Peak Found	Peak Found	Peak Found	High	High	0	4.255e-09	6.03	56.56
FALSE	High	[R].GAKEKNLKVKGPVR.[M]	R	4xAcetyl:2H(3) [K3; K5; K8; K10]; 1xAcetyl:2H(3) [N-Term]	P60866 4xAcetyl:2H(3) [K44; K46; K49; K51]; 1xAcetyl:2H(3) [N-Term]	FALSE	0.00666445	0	1	1	1	P60866	P60866 [42-55]	0	1749.09	0	0.457	0.442	0.553	0.922859	0.94872	0.889226	0	0	0	163.1	74.5	72.1	90.2		Peak Found	Peak Found	Peak Found	High	High	0	9.459e-05	4.04	41.13
FALSE	High	[R].TALLDAAGVASLLTTAE.[V]	R			FALSE	0.0189876	0	1	1	2	P10809	P10809 [527-543]	0	1616.87	0	3.227	0.01	20.85	0.256124	3.7678e-17	0.000553637	0		0	16	51.5		332.6		Peak Found	High	Not Found	Peak Found	High	0	0.0005681	4.15	72.6
FALSE	High	[E].GAELVDSVLDVVR.[K]	E	1xAcetyl:2H(3) [N-Term]	Q13885 1xAcetyl:2H(3) [N-Term]; Q13509 1xAcetyl:2H(3) [N-Term]; P07437 1xAcetyl:2H(3) [N-Term]; P68371 1xAcetyl:2H(3) [N-Term]; Q9BVA1 1xAcetyl:2H(3) [N-Term]	FALSE	0.00413936	0	1	5	33	P07437	Q13885 [109-121]; Q13509 [109-121]; P07437 [109-121]; P68371 [109-121]; Q9BVA1 [109-121]	0	1416.78	0	42.814	35.11	30.656	3.90655e-13	7.15003e-12	2.89886e-14	0	0	0	3.7	156.3	128.2	111.9		Peak Found	High	High	High	High	0	9.837e-05	4.69	79.66
FALSE	High	[E].FATHEEAVAAMSKDR.[A]	E	1xAcetyl:2H(3) [K13]; 1xAcetyl:2H(3) [N-Term]	P52597 1xAcetyl:2H(3) [K347]; 1xAcetyl:2H(3) [N-Term]	FALSE	0.0130279	0	1	1	1	P52597	P52597 [335-349]	0	1752.85	0	100	100	100	4.34403e-17	3.7678e-17	4.94188e-17					169.9	111.1	119		Not Found	Peak Found	High	Peak Found	High	0	0.0002965	4.32	42.64
FALSE	High	[E].FATHEDAVAAMSKDKANMQHR.[Y]	E	2xAcetyl:2H(3) [K13; K15]; 1xAcetyl:2H(3) [N-Term]	P31943 2xAcetyl:2H(3) [K347; K349]; 1xAcetyl:2H(3) [N-Term]	FALSE	8.61569e-06	0	1	1	1	P31943	P31943 [335-355]	0	2493.2	1	100	100	100	4.34403e-17	3.7678e-17	4.94188e-17					163.1	95.2	141.8		Not Found	High	Peak Found	Peak Found	High	0	1.15e-09	6.54	45.34
FALSE	High	[E].FATHEDAVAAMAKDKANMQHR.[Y]	E	1xOxidation [M11]; 2xAcetyl:2H(3) [K13; K15]; 1xAcetyl:2H(3) [N-Term]	P55795 1xOxidation [M345]; 2xAcetyl:2H(3) [K347; K349]; 1xAcetyl:2H(3) [N-Term]	FALSE	1.77273e-05	0	1	1	1	P55795	P55795 [335-355]	0	2493.2	0														No Quan Values	Not Found	High	Peak Found	Peak Found	High	0	3.945e-09	6.31	45.34
FALSE	High	[E].FATHEDAVAAMAKDKANMQHR.[Y]	E	2xAcetyl:2H(3) [K13; K15]; 1xAcetyl:2H(3) [N-Term]	P55795 2xAcetyl:2H(3) [K347; K349]; 1xAcetyl:2H(3) [N-Term]	FALSE	1.4312e-05	0	1	1	5	P55795	P55795 [335-355]	0	2477.2	0	12.214	9.693	9.445	0.00245858	0.0922275	0.0174186	0	0	0	12.4	151	119.8	116.8		Peak Found	High	Peak Found	High	High	0	7.885e-09	6.83	49.93
FALSE	High	[R].FASENDLPEWKER.[G]	R	1xAcetyl:2H(3) [K11]	P43487 1xAcetyl:2H(3) [K68]	FALSE	0.00978593	0	1	1	1	P43487	P43487 [58-70]	0	1665.79	0	1.029	1.311	0.963	0.867922	0.801158	0.937354	0	0	0	93	95.7	121.9	89.5		High	Peak Found	Peak Found	Peak Found	High	0	0.0001826	4.34	41.17
FALSE	High	[E].FAIQPNTTGKQLFDQVVKTVGLR.[E]	E	2xAcetyl:2H(3) [K10; K18]; 1xAcetyl:2H(3) [N-Term]	P35241 2xAcetyl:2H(3) [K27; K35]; 1xAcetyl:2H(3) [N-Term]	FALSE	0.000829706	0	1	1	5	P35241	P35241 [18-40]	0	2695.51	0	100	100	100	4.34403e-17	3.7678e-17	4.94188e-17					158.7	122.2	119.1		Not Found	High	High	High	High	0	8.154e-05	2.78	88.83
FALSE	High	[E].FAIQPNTTGKQLFDQVVKTIGLR.[E]	E	2xAcetyl:2H(3) [K10; K18]; 1xAcetyl:2H(3) [N-Term]	P26038 2xAcetyl:2H(3) [K27; K35]; 1xAcetyl:2H(3) [N-Term]; P15311 2xAcetyl:2H(3) [K27; K35]; 1xAcetyl:2H(3) [N-Term]	FALSE	0.00051818	0	1	2	32	P26038	P26038 [18-40]; P15311 [18-40]	0	2709.53	0	21.389	16.758	20.037	1.38709e-08	0.000335522	1.53735e-09	0	0	0	6.8	144.6	113.3	135.4		Peak Found	High	High	High	High	0	6.033e-05	3.5	93.12
FALSE	High	[P].FAKLVRPPVQVYGIEGR.[Y]	P	1xAcetyl:2H(3) [K3]; 1xAcetyl:2H(3) [N-Term]	P48047 1xAcetyl:2H(3) [K26]; 1xAcetyl:2H(3) [N-Term]	FALSE	0.00195234	0	1	1	23	P48047	P48047 [24-40]	0	2019.17	0	1.007	1.157	0.715	0.900563	0.803244	0.956839	0	0	0	103.1	103.9	119.3	73.7		High	High	High	High	High	0	4.12e-05	5.02	61.74
FALSE	High	[L].EYLTAEILELAGNAAR.[D]	L	1xGlu->pyro-Glu [N-Term]	Q16777 1xGlu->pyro-Glu [N-Term]; Q7L7L0 1xGlu->pyro-Glu [N-Term]; Q8IUE6 1xGlu->pyro-Glu [N-Term]; P04908 1xGlu->pyro-Glu [N-Term]; Q93077 1xGlu->pyro-Glu [N-Term]; Q99878 1xGlu->pyro-Glu [N-Term]; Q96KK5 1xGlu->pyro-Glu [N-Term]; Q9BTM1 1xGlu->pyro-Glu [N-Term]; O75367 1xGlu->pyro-Glu [N-Term]; P16104 1xGlu->pyro-Glu [N-Term]; P20671 1xGlu->pyro-Glu [N-Term]; P0C0S8 1xGlu->pyro-Glu [N-Term]; Q6F…	FALSE	0.00453652	0	3	13	20	P04908; O75367; Q6FI13	Q16777 [57-72]; Q7L7L0 [57-72]; Q8IUE6 [57-72]; P04908 [57-72]; Q93077 [57-72]; Q99878 [57-72]; Q96KK5 [57-72]; Q9BTM1 [57-72]; O75367 [54-69]; P16104 [57-72]; P20671 [57-72]; P0C0S8 [57-72]; Q6FI13 [57-72]	0	1715.9	0	0.955	0.714	1.074	0.915781	0.995349	0.919342	0	0	0	106.9	102.1	76.3	114.7	Shared	High	Peak Found	Peak Found	High	High	6.911e-05	0.001548	2.45	78.09
FALSE	High	[R].TDFKEEPEPGFKR.[L]	R	2xAcetyl:2H(3) [K4; K12]	P47897 2xAcetyl:2H(3) [K620; K628]	FALSE	0.011964	0	1	1	3	P47897	P47897 [617-629]	0	1669.83	0	0.482	0.198	0.961	0.853175	0.395542	0.939903	0	0	0	151.5	73	30	145.5		High	Peak Found	High	High	High	0	0.0002581	3.39	36.79
FALSE	High	[D].EYGRPFLIIKDQDR.[K]	D	1xGlu->pyro-Glu [N-Term]; 1xAcetyl:2H(3) [K10]	P48643 1xGlu->pyro-Glu [N-Term]; 1xAcetyl:2H(3) [K20]	FALSE	0.0241975	0	1	1	4	P48643	P48643 [11-24]	0	1776.95	0	0.574	0.301	0.548	0.939454	0.806496	0.897743	0	0	0	165	94.8	49.8	90.4		High	High	Peak Found	High	High	0.0001879	0.003153	4.17	53.21
FALSE	High	[Q].EYAQVIKMLGNGR.[L]	Q	1xGlu->pyro-Glu [N-Term]; 1xAcetyl:2H(3) [K7]	P47813 1xGlu->pyro-Glu [N-Term]; 1xAcetyl:2H(3) [K40]; O14602 1xGlu->pyro-Glu [N-Term]; 1xAcetyl:2H(3) [K40]	FALSE	0.0110537	0	1	2	1	O14602	P47813 [34-46]; O14602 [34-46]	0	1505.8	0	0.481	0.801	0.352	0.895998	0.978842	0.622736	0	0	0	151.9	73	121.7	53.5		Peak Found	High	Peak Found	Peak Found	High	0	0.0002235	3.66	63.29
FALSE	High	[T].EWLDGKHVVFGKVKEGMNIVEAMER.[F]	T	1xGlu->pyro-Glu [N-Term]; 3xAcetyl:2H(3) [K6; K12; K14]	P62937 1xGlu->pyro-Glu [N-Term]; 3xAcetyl:2H(3) [K125; K131; K133]	FALSE	0.000313863	0	1	1	2	P62937	P62937 [120-144]	0	3018.55	0	0.982	1.178	0.87	0.912963	0.888737	0.986131	0	0	0	99.2	97.5	116.9	86.4		Peak Found	High	Peak Found	High	High	0	1.428e-06	5.96	90.95
FALSE	High	[G].EWEAPQIANPR.[C]	G	1xGlu->pyro-Glu [N-Term]	P27824 1xGlu->pyro-Glu [N-Term]	FALSE	0.0131874	0	1	1	13	P27824	P27824 [349-359]	0	1292.64	0	0.429	0.038	0.373	0.83505	0.077235	0.718703	0	0	0	217.4	93.3	8.2	81.1		High	High	Peak Found	High	High	0.0005741	0.009718	2.56	44.02
FALSE	High	[S].EVYQLGDVSQKTTWHR.[I]	S	1xGlu->pyro-Glu [N-Term]; 1xAcetyl:2H(3) [K11]	Q04837 1xGlu->pyro-Glu [N-Term]; 1xAcetyl:2H(3) [K81]	FALSE	0.00197635	0	1	1	2	Q04837	Q04837 [71-86]	0	1973.99	0	0.428	0.419	0.598	0.829678	0.906545	0.927267	0	0	0	163.6	70	68.6	97.8		High	Peak Found	Peak Found	Peak Found	High	0	1.191e-05	4.81	47.85
FALSE	High	[R].TDITYPAGFMDVISIDKTGENFR.[L]	R	1xAcetyl:2H(3) [K17]	P62701 1xAcetyl:2H(3) [K94]	FALSE	0.00893106	0	1	1	1	P62701	P62701 [78-100]	0	2635.28	0	0.01	0.01	0.489	4.34403e-17	3.7678e-17	0.828499			0	268.6			131.4		High	Not Found	Not Found	Peak Found	High	0	0.0001555	4.47	67.08
FALSE	High	[F].EVVATNGDTHLGGEDFDQR.[V]	F	1xGlu->pyro-Glu [N-Term]	P11021 1xGlu->pyro-Glu [N-Term]	FALSE	0.00377693	0	1	1	1	P11021	P11021 [243-261]	0	2041.92	0	0.01	0.041	0.17	4.34403e-17	0.0849052	0.158479		0	0	330.4		13.4	56.2		High	Not Found	Peak Found	Peak Found	High	0	3.582e-05	4.07	37.07
FALSE	High	[E].TDIVVDHYKEEKFEDR.[S]	E	2xAcetyl:2H(3) [K9; K12]; 1xAcetyl:2H(3) [N-Term]	Q12931 2xAcetyl:2H(3) [K560; K563]; 1xAcetyl:2H(3) [N-Term]	FALSE	0.00216607	0	1	1	1	Q12931	Q12931 [552-567]	0	2158.06	0	100	100	100	4.34403e-17	3.7678e-17	4.94188e-17					125.2	66.5	208.3		Not Found	High	Peak Found	Peak Found	High	0	1.401e-05	5.63	51.33
FALSE	High	[R].TDYNASVSVPDSSGPER.[I]	R			FALSE	0.000148856	0	1	1	6	P61978	P61978 [70-86]	0	1780.8	0	0.188	0.135	0.58	0.0161944	0.00169767	0.796244	0	0	0	210.2	39.6	28.3	121.9		High	Peak Found	High	High	High	0	2.225e-07	3.87	28.54
FALSE	High	[A].EVQKLQMEAPHIIVGTPGR.[V]	A	1xGlu->pyro-Glu [N-Term]; 1xAcetyl:2H(3) [K4]	P60842 1xGlu->pyro-Glu [N-Term]; 1xAcetyl:2H(3) [K146]	FALSE	0.00780995	0	1	1	1	P60842	P60842 [143-161]	0	2130.16	0	0.692	1.065	1.255	0.999815	0.928154	0.862627	0	0	0	99.7	69	106.2	125.1		Peak Found	Peak Found	Peak Found	High	High	0	0.0001245	3.7	52.8
FALSE	High	[Q].EVNILKKTLEEEAKTHEAQIQEMR.[Q]	Q	1xGlu->pyro-Glu [N-Term]; 3xAcetyl:2H(3) [K6; K7; K14]	P35579 1xGlu->pyro-Glu [N-Term]; 3xAcetyl:2H(3) [K1173; K1174; K1181]	FALSE	0.000374756	0	1	1	1	P35579	P35579 [1168-1191]	0	2984.57	0	0.029	0.01	0.138	0.000823657	3.7678e-17	0.104901	0		0	342.8	10		47.3		High	Peak Found	Not Found	Peak Found	High	0	7.027e-07	4.42	71.19
FALSE	High	[G].EVIVTKDDAMLLKGKGDKAQIEKR.[I]	G	1xGlu->pyro-Glu [N-Term]; 1xOxidation [M10]; 5xAcetyl:2H(3) [K6; K13; K15; K18; K23]	P10809 1xGlu->pyro-Glu [N-Term]; 1xOxidation [M356]; 5xAcetyl:2H(3) [K352; K359; K361; K364; K369]	FALSE	0.00233087	0	1	1	4	P10809	P10809 [347-370]	0	2908.63	0	6.037	0.01	3.544	0.0332089	3.7678e-17	0.134014	0		0	37.8	228.2		134		Peak Found	High	Not Found	Peak Found	High	0	1.577e-05	3.92	58.66
FALSE	High	[G].EVIVTKDDAMLLKGKGDKAQIEKR.[I]	G	1xGlu->pyro-Glu [N-Term]; 5xAcetyl:2H(3) [K6; K13; K15; K18; K23]	P10809 1xGlu->pyro-Glu [N-Term]; 5xAcetyl:2H(3) [K352; K359; K361; K364; K369]	FALSE	0.000241298	0	1	1	11	P10809	P10809 [347-370]	0	2892.63	0	0.39	0.093	1.658	0.443358	0.00734846	0.288014	0	0	0	127.3	49.6	11.8	211.2		High	High	Peak Found	High	High	0	2.924e-06	4.77	64.09
FALSE	High	[R].FDAGELITQR.[E]	R			FALSE	0.0156346	0	1	1	6	P35232	P35232 [134-143]	0	1149.59	0	0.59	1.069	0.396	0.957725	0.935887	0.744821	0	0	0	130.9	77.3	139.9	51.9		Peak Found	High	Peak Found	Peak Found	High	0	0.0004613	3.83	38.88
FALSE	High	[R].FDGALNVDLTEFQTNLVPYPR.[I]	R			FALSE	0.00031195	0	2	7	1	Q13748; P68363	Q13748 [244-264]; Q6PEY2 [244-264]; Q71U36 [244-264]; Q9NY65 [244-264]; P68363 [244-264]; Q9BQE3 [244-264]; P68366 [244-264]	0	2409.21	0		100	100		3.7678e-17	4.94188e-17						130.5	269.5	Shared	Not Found	Not Found	High	Peak Found	High	0	5.162e-07	4.5	66.64
FALSE	High	[M].TDAAVSFAKDFLAGGVAAAISKTAVAPIER.[V]	M	1xAcetyl [N-Term]; 2xAcetyl:2H(3) [K9; K22]	P05141 1xAcetyl [N-Term]; 2xAcetyl:2H(3) [K10; K23]	FALSE	0.000738719	0	1	1	17	P05141	P05141 [2-31]	0	3079.66	0	0.704	0.575	1.052	0.935955	0.745223	0.854828	0	0	0	120.1	84.6	69	126.3		High	High	High	High	High	0	9.193e-06	5.12	102.22
FALSE	High	[L].TAVHDAILEDLVFPSEIVGKR.[I]	L	1xAcetyl:2H(3) [K20]; 1xAcetyl:2H(3) [N-Term]	P62081 1xAcetyl:2H(3) [K142]; 1xAcetyl:2H(3) [N-Term]	FALSE	0.0129489	0	1	1	1	P62081	P62081 [123-143]	0	2399.31	0	0.166	0.543	0.01	0.299465	0.976055	4.94188e-17	0	0		234	38.9	127.1			High	Peak Found	Peak Found	Not Found	High	0	0.0002935	3.29	74.15
FALSE	High	[R].GAEIEYAMAYSKAAFER.[E]	R	1xAcetyl:2H(3) [K12]; 1xAcetyl:2H(3) [N-Term]	Q969H8 1xAcetyl:2H(3) [K125]; 1xAcetyl:2H(3) [N-Term]	FALSE	0.0057916	0	1	1	1	Q969H8	Q969H8 [114-130]	0	1996.96	0	0.119	0.293	0.01	0.231575	0.844747	4.94188e-17	0	0		283.3	33.6	83.1			High	Peak Found	Peak Found	Not Found	High	0	7.46e-05	2.61	76.82
FALSE	High	[E].GAEKKQQMAR.[E]	E	2xAcetyl:2H(3) [K4; K5]; 1xAcetyl:2H(3) [N-Term]	P63104 2xAcetyl:2H(3) [K74; K75]; 1xAcetyl:2H(3) [N-Term]	FALSE	0.0273107	0	1	1	35	P63104	P63104 [71-80]	0	1281.69	0	34.364	14.25	20.169	4.45279e-11	0.0168099	6.42731e-07	0	0	0	5.7	197	81.7	115.6		Peak Found	High	High	High	High	0.001291	0.01915	3.36	25.72
FALSE	High	[E].TALLIDPKNSCSSSR.[Q]	E	1xCarbamidomethyl [C11]; 1xAcetyl:2H(3) [K8]; 1xAcetyl:2H(3) [N-Term]	A6NEC2 1xCarbamidomethyl [C339]; 1xAcetyl:2H(3) [K336]; 1xAcetyl:2H(3) [N-Term]; P55786 1xCarbamidomethyl [C339]; 1xAcetyl:2H(3) [K336]; 1xAcetyl:2H(3) [N-Term]	FALSE	0.0122589	0	1	2	6	P55786	A6NEC2 [329-343]; P55786 [329-343]	0	1738.89	0	100	100	100	4.34403e-17	3.7678e-17	4.94188e-17					157.8	126.1	116		Not Found	High	High	High	High	6.911e-05	0.001957	3.56	50.5
FALSE	High	[E].TAPAAPAAPAPAEKTPVKKKAR.[K]	E	4xAcetyl:2H(3) [K14; K18; K19; K20]; 1xAcetyl:2H(3) [N-Term]	P10412 4xAcetyl:2H(3) [K17; K21; K22; K23]; 1xAcetyl:2H(3) [N-Term]	FALSE	0.00105954	0	1	1	4	P10412	P10412 [4-25]	0	2396.41	0	61.993	42.708	86.146	4.95511e-11	9.13715e-05	4.94188e-17	0	0	0	2.1	129.3	89	179.6		Peak Found	High	High	Peak Found	High	0	4.14e-06	2.68	37.06
FALSE	High	[E].TAQEHNENDQQIR.[E]	E	1xAcetyl:2H(3) [N-Term]	Q13217 1xAcetyl:2H(3) [N-Term]	FALSE	0.00554932	0	1	1	11	Q13217	Q13217 [365-377]	0	1627.75	0	100	100	100	4.34403e-17	3.7678e-17	4.94188e-17					120.3	140.8	138.8		Not Found	High	High	High	High	0	0.0001458	4.11	17.05
FALSE	High	[E].TAQQNMENHPVIR.[T]	E	1xAcetyl:2H(3) [N-Term]	Q05048 1xAcetyl:2H(3) [N-Term]	FALSE	0.00314444	0	1	1	1	Q05048	Q05048 [155-167]	0	1582.78	0	25.579	21.658	12.854	2.49917e-05	0.00683225	0.0026149	0	0	0	6.5	167.5	141.8	84.2		Peak Found	High	Peak Found	Peak Found	High	0	2.626e-05	4.54	24.88
FALSE	High	[R].TATESFASDPILYRPVAVALDTKGPEIR.[T]	R	1xAcetyl:2H(3) [K23]	P14618 1xAcetyl:2H(3) [K115]	FALSE	0.000120915	0	1	1	2	P14618	P14618 [93-120]	0	3062.62	0	0.195	0.01	1.06	0.0720542	3.7678e-17	0.848385	0		0	177.4	34.6		188		High	Peak Found	Not Found	High	High	0	1.035e-07	5.8	61.63
FALSE	High	[E].FNFIVPTGKTGLIIGKGGETIKSISQQSGAR.[I]	E	3xAcetyl:2H(3) [K9; K16; K22]; 1xAcetyl:2H(3) [N-Term]	Q96AE4 3xAcetyl:2H(3) [K387; K394; K400]; 1xAcetyl:2H(3) [N-Term]	FALSE	0.0196915	0	1	1	1	Q96AE4	Q96AE4 [379-409]	0	3384.89	0	100	100	100	4.34403e-17	3.7678e-17	4.94188e-17					163.8	101.8	134.4		Not Found	Peak Found	Peak Found	High	High	0	0.0006053	2.81	82.19
FALSE	High	[E].FNDVYQEVKGSMNDGR.[L]	E	1xAcetyl:2H(3) [K9]; 1xAcetyl:2H(3) [N-Term]	Q08945 1xAcetyl:2H(3) [K15]; 1xAcetyl:2H(3) [N-Term]	FALSE	0.000184379	0	1	1	4	Q08945	Q08945 [7-22]	0	1948.9	0	44.422	53.193	46.954	1.46206e-06	0.000101182	6.06793e-09	0	0	0	2.7	122.1	146.2	129		Peak Found	Peak Found	High	High	High	0	3.773e-05	3.54	65.34
FALSE	High	[E].FMILPVGAANFR.[E]	E	1xOxidation [M2]; 1xAcetyl:2H(3) [N-Term]	P06733 1xOxidation [M169]; 1xAcetyl:2H(3) [N-Term]	FALSE	0.00898566	0	1	1	5	P06733	P06733 [168-179]	0	1396.75	0	21.229	22.385	16.494	3.35233e-09	2.10186e-09	5.66375e-10	0	0	0	6.5	139	146.5	108		Peak Found	High	High	High	High	0	0.0006507	2.81	67.36
FALSE	High	[E].FMILPVGAANFR.[E]	E	1xAcetyl:2H(3) [N-Term]	P06733 1xAcetyl:2H(3) [N-Term]	FALSE	0.00752932	0	1	1	57	P06733	P06733 [168-179]	0	1380.75	0	23.145	18.11	15.009	1.21229e-09	2.40952e-08	1.53735e-09	0	0	0	7	161.7	126.5	104.8		High	High	High	High	High	0	0.0003325	3.78	76.12
FALSE	High	[R].GISHVIVDEIHER.[D]	R	1xAcetyl:2H(3) [N-Term]	Q08211 1xAcetyl:2H(3) [N-Term]	FALSE	0.0063469	0	1	1	1	Q08211	Q08211 [504-516]	0	1548.82	0	0.495	0.174	0.881	0.87306	0.449365	0.985609	0	0	0	156.9	77.7	27.2	138.2		Peak Found	Peak Found	Peak Found	High	High	0	8.685e-05	4.42	46.01
FALSE	High	[E].FLTPVEEAPKGMLAR.[G]	E	1xAcetyl:2H(3) [K10]; 1xAcetyl:2H(3) [N-Term]	P52565 1xAcetyl:2H(3) [K167]; 1xAcetyl:2H(3) [N-Term]; P52566 1xAcetyl:2H(3) [K164]; 1xAcetyl:2H(3) [N-Term]	FALSE	0.00996644	0	1	2	2	P52565	P52565 [158-172]; P52566 [155-169]	0	1748.95	0	100	100	100	4.34403e-17	3.7678e-17	4.94188e-17					124.5	108.2	167.2		Not Found	Peak Found	High	High	High	0	0.0001883	3.6	66.49
FALSE	High	[E].FLSTINVGLTSIANLPKLNKLKKLELSDNR.[V]	E	4xAcetyl:2H(3) [K17; K20; K22; K23]; 1xAcetyl:2H(3) [N-Term]	P39687 4xAcetyl:2H(3) [K62; K65; K67; K68]; 1xAcetyl:2H(3) [N-Term]	FALSE	0.000359054	0	1	1	9	P39687	P39687 [46-75]	0	3565.08	0	100	100	100	4.34403e-17	3.7678e-17	4.94188e-17					195.4	30.1	174.6		Not Found	High	High	High	High	0	6.578e-07	4.69	97.13
FALSE	High	[E].FLSMANVELSSLAR.[L]	E	1xAcetyl:2H(3) [N-Term]	Q9BTT0 1xAcetyl:2H(3) [N-Term]	FALSE	0.000442021	0	1	1	5	Q9BTT0	Q9BTT0 [46-59]	0	1582.83	0	43.913	36.465	22.761	4.76993e-08	0.000603507	1.23355e-05	0	0	0	3.8	168.7	140.1	87.4		Peak Found	High	Peak Found	High	High	0	9.388e-07	3.79	78.55
FALSE	High	[S].TATFAQALQFVPETQVSLLDNGLR.[V]	S	1xAcetyl:2H(3) [N-Term]	P31930 1xAcetyl:2H(3) [N-Term]	FALSE	0.00261782	0	1	1	13	P31930	P31930 [35-58]	0	2664.41	0	0.506	0.956	1.077	0.803089	0.951719	0.831269	0	0	0	113	57.2	108.1	121.7		High	High	High	High	High	0	1.926e-05	4.13	81.47
FALSE	High	[E].TAVGAAIKSFENSLGINVPR.[S]	E	1xAcetyl:2H(3) [K8]; 1xAcetyl:2H(3) [N-Term]	Q16851 1xAcetyl:2H(3) [K377]; 1xAcetyl:2H(3) [N-Term]	FALSE	0.00800281	0	1	1	4	Q16851	Q16851 [370-389]	0	2134.18	0	100	100	100	4.34403e-17	3.7678e-17	4.94188e-17					100.5	133.3	166.2		Not Found	Peak Found	High	High	High	0	0.0001287	3.86	89.27
FALSE	High	[R].FHVEEEGKGKDASGNKVKAEPAKIEAFR.[A]	R	5xAcetyl:2H(3) [K8; K10; K16; K18; K23]; 1xAcetyl:2H(3) [N-Term]	P00558 5xAcetyl:2H(3) [K131; K133; K139; K141; K146]; 1xAcetyl:2H(3) [N-Term]	FALSE	0.00164528	0	1	1	4	P00558	P00558 [124-151]	0	3341.77	0	0.781	0.429	0.68	0.983683	0.815688	0.961625	0	0	0	138.4	108.1	59.3	94.2		High	Peak Found	Peak Found	High	High	0	8.782e-06	5	47.13
FALSE	High	[R].FHVEEEGKGKDASGNKVKAEPAKIEAFR.[A]	R	5xAcetyl:2H(3) [K8; K10; K16; K18; K23]	P00558 5xAcetyl:2H(3) [K131; K133; K139; K141; K146]	FALSE	2.04042e-05	0	1	1	66	P00558	P00558 [124-151]	0	3296.74	0	0.785	0.421	0.718	0.985294	0.379623	0.961625	0	0	0	136.8	107.4	57.6	98.2		High	High	High	High	High	0	1.069e-07	6.92	45.26
FALSE	High	[R].FHDFLGDSWGILFSHPR.[D]	R			FALSE	5.76979e-05	0	1	1	1	P30041	P30041 [25-41]	0	2030.99	0	3.093	1.111	0.605	0.211395	0.919228	0.932191	0	0	0	68.9	213	76.5	41.7		Peak Found	High	Peak Found	Peak Found	High	0	2.936e-08	4.35	63.45
FALSE	High	[E].FGNLALIDQDAGQEDGVAIPLPGVR.[K]	E	1xAcetyl:2H(3) [N-Term]	Q15269 1xAcetyl:2H(3) [N-Term]	FALSE	0.0125609	0	1	1	5	Q15269	Q15269 [666-690]	0	2610.36	0	21.998	35.092	78.193	0.000583855	0.0146769	4.35324e-07	0	0	0	2.9	64.6	103	229.5		Peak Found	High	Peak Found	High	High	0.00703	0.07281	2.93	75.06
FALSE	High	[E].FGKRPAEDMEEEQAFKR.[S]	E	1xOxidation [M9]; 2xAcetyl:2H(3) [K3; K16]; 1xAcetyl:2H(3) [N-Term]	P61978 1xOxidation [M27]; 2xAcetyl:2H(3) [K21; K34]; 1xAcetyl:2H(3) [N-Term]	FALSE	0.00161539	0	1	1	4	P61978	P61978 [19-35]	0	2219.07	0	100	100	100	4.34403e-17	3.7678e-17	4.94188e-17					161.6	81.7	156.8		Not Found	High	High	High	High	0	5.016e-05	5.05	41.21
FALSE	High	[E].FGKRPAEDMEEEQAFKR.[S]	E	2xAcetyl:2H(3) [K3; K16]; 1xAcetyl:2H(3) [N-Term]	P61978 2xAcetyl:2H(3) [K21; K34]; 1xAcetyl:2H(3) [N-Term]	FALSE	0.000133342	0	1	1	23	P61978	P61978 [19-35]	0	2203.08	0	46.073	27.058	53.779	1.35984e-13	2.08725e-10	4.94188e-17	0	0	0	3.1	144.1	84.6	168.2		Peak Found	High	High	High	High	0	1.731e-06	5.16	46.61
FALSE	High	[M].TAVHAGNINFKWDPKSLEIR.[T]	M	1xAcetyl [N-Term]; 2xAcetyl:2H(3) [K11; K15]	P35221 1xAcetyl [N-Term]; 2xAcetyl:2H(3) [K12; K16]	FALSE	9.52607e-05	0	1	1	4	P35221	P35221 [2-21]	0	2428.29	0	0.159	0.01	2.232	0.360752	3.7678e-17	0.50705	0		0	117.9	18.8		263.3		Peak Found	Peak Found	Not Found	High	High	0	2.281e-07	6.03	62.72
FALSE	High	[R].TATESFASDPILYRPVAVALDTKGPEIR.[T]	R	1xAcetyl:2H(3) [K23]; 1xAcetyl:2H(3) [N-Term]	P14618 1xAcetyl:2H(3) [K115]; 1xAcetyl:2H(3) [N-Term]	FALSE	0.000790104	0	1	1	26	P14618	P14618 [93-120]	0	3107.65	0	0.537	0.01	1.862	0.87306	3.7678e-17	0.184533	0		0	117.7	63.2		219.1		High	High	Not Found	High	High	0	1.723e-05	5.28	66.17
FALSE	High	[M].SVNAVMKVIDPATATSVDLR.[D]	M	1xAcetyl:2H(3) [K7]; 1xAcetyl:2H(3) [N-Term]	P50991 1xAcetyl:2H(3) [K193]; 1xAcetyl:2H(3) [N-Term]	FALSE	8.32707e-05	0	1	1	1	P50991	P50991 [187-206]	0	2177.18	0	0.062	0.01	0.369	0.0125469	3.7678e-17	0.621329	0		0	279.5	17.3		103.3		High	Peak Found	Not Found	Peak Found	High	0	5.452e-08	5.12	72.22
FALSE	High	[E].GLTLNLEDVQPHDLGKVGEVIVTKDDAMLLKGKGDKAQIEKR.[I]	E	6xAcetyl:2H(3) [K16; K24; K31; K33; K36; K41]; 1xAcetyl:2H(3) [N-Term]	P10809 6xAcetyl:2H(3) [K344; K352; K359; K361; K364; K369]; 1xAcetyl:2H(3) [N-Term]	FALSE	0.000607458	0	1	1	1	P10809	P10809 [329-370]	0	4886.69	0	100	100	100	4.34403e-17	3.7678e-17	4.94188e-17					229.1	102	68.9		Not Found	High	Peak Found	Peak Found	High	0	1.602e-06	6.24	82.44
FALSE	High	[R].SVMTEEYKVPDGMVGFIIGR.[G]	R	1xAcetyl:2H(3) [K8]; 1xAcetyl:2H(3) [N-Term]	Q96AE4 1xAcetyl:2H(3) [K106]; 1xAcetyl:2H(3) [N-Term]	FALSE	0.000229779	0	1	1	3	Q96AE4	Q96AE4 [99-118]	0	2318.17	0	0.01	0.01	0.167	4.34403e-17	3.7678e-17	0.102111			0	342.6			57.4		High	Not Found	Not Found	Peak Found	High	0	6.314e-05	3.78	77.9
FALSE	High	[R].KGHAVGDIPGVR.[F]	R	1xAcetyl:2H(3) [K1]; 1xAcetyl:2H(3) [N-Term]	P62266 1xAcetyl:2H(3) [K108]; 1xAcetyl:2H(3) [N-Term]	FALSE	0.00213976	0	1	1	3	P62266	P62266 [108-119]	0	1295.73	0	1.002	1.079	0.952	0.905375	0.868744	0.923449	0	0	0	99.2	99.4	107	94.4		High	High	High	Peak Found	High	0	0.0002048	4.55	33.53
FALSE	High	[R].STGEAFVQFASKEIAENALGKHKER.[I]	R	3xAcetyl:2H(3) [K12; K21; K23]; 1xAcetyl:2H(3) [N-Term]	P31942 3xAcetyl:2H(3) [K67; K76; K78]; 1xAcetyl:2H(3) [N-Term]	FALSE	0.0062699	0	1	1	1	P31942	P31942 [56-80]	0	2927.53	0	1.188	1.681	1.206	0.803089	0.74305	0.871262	0	0	0	78.8	93.6	132.5	95.1		Peak Found	High	Peak Found	Peak Found	High	0	8.515e-05	3.62	73.67
FALSE	High	[R].KGEFETGFEKGGQTR.[E]	R	2xAcetyl:2H(3) [K1; K10]	P15170 2xAcetyl:2H(3) [K187; K196]; Q8IYD1 2xAcetyl:2H(3) [K316; K325]	FALSE	0.00114018	0	1	2	1	Q8IYD1	P15170 [187-201]; Q8IYD1 [316-330]	0	1760.87	0	0.326	0.133	0.661	0.639971	0.429188	0.965626	0	0	0	188.7	61.4	25.1	124.7		High	Peak Found	Peak Found	Peak Found	High	0	4.702e-06	4.93	35.46
FALSE	High	[R].KEQTADGVAVIPVLQR.[T]	R	1xAcetyl:2H(3) [K1]	Q9UKK9 1xAcetyl:2H(3) [K55]	FALSE	0.0241975	0	1	1	2	Q9UKK9	Q9UKK9 [55-70]	0	1769	0	0.204	0.258	0.208	0.250912	0.5115	0.120234	0	0	0	239.4	48.9	61.8	49.9		High	Peak Found	High	Peak Found	High	0	0.001003	3.56	45.16
FALSE	High	[R].KELQAAGKSPEDLER.[L]	R	2xAcetyl:2H(3) [K1; K8]	P06744 2xAcetyl:2H(3) [K447; K454]	FALSE	9.76193e-05	0	1	1	2	P06744	P06744 [447-461]	0	1760.93	0	0.324	0.177	0.958	0.198598	0.0266716	0.919342	0	0	0	162.6	52.8	28.8	155.8		Peak Found	Peak Found	High	High	High	0	7.139e-08	6.04	33.65
FALSE	High	[R].KEIPAKIIFEDDR.[C]	R	2xAcetyl:2H(3) [K1; K6]	P49773 2xAcetyl:2H(3) [K25; K30]	FALSE	0.00437329	0	1	1	1	P49773	P49773 [25-37]	0	1663.92	0	0.528	0.877	0.442	0.888572	0.981674	0.70282	0	0	0	140.5	74.2	123.2	62.1		High	Peak Found	Peak Found	Peak Found	High	0	4.642e-05	4.14	52.86
FALSE	High	[R].STGEAFVQFASQEIAEKALKKHKER.[I]	R	4xAcetyl:2H(3) [K17; K20; K21; K23]; 1xAcetyl:2H(3) [N-Term]	P31943 4xAcetyl:2H(3) [K167; K170; K171; K173]; 1xAcetyl:2H(3) [N-Term]; P55795 4xAcetyl:2H(3) [K167; K170; K171; K173]; 1xAcetyl:2H(3) [N-Term]	FALSE	0.000302557	0	2	2	32	P31943; P55795	P31943 [151-175]; P55795 [151-175]	0	3057.65	0	0.708	0.768	0.946	0.937856	0.96121	0.927267	0	0	0	116.9	82.7	89.8	110.6	Shared	High	High	High	High	High	0	2.416e-05	5.05	73.24
FALSE	High	[R].KEKGSREEKQKPQAER.[K]	R	4xAcetyl:2H(3) [K1; K3; K9; K11]	P26641 4xAcetyl:2H(3) [K233; K235; K241; K243]	FALSE	0.000819623	0	1	1	21	P26641	P26641 [233-248]	1	2108.15	0	0.584	1.014	0.669	0.803089	0.915049	0.919342	0	0	0	122.4	71.5	124.2	81.9		High	High	High	High	High	0	0.0002694	4.87	17.96
FALSE	High	[R].KEGGLGPLNIPLLADVTR.[R]	R	1xAcetyl:2H(3) [K1]	P32119 1xAcetyl:2H(3) [K92]	FALSE	3.27881e-06	0	1	1	9	P32119	P32119 [92-109]	0	1908.1	0	0.557	0.907	0.499	0.815155	0.964807	0.716135	0	0	0	135	75.1	122.5	67.4		High	High	High	High	High	0	2.232e-10	5.92	68.98
FALSE	High	[R].KEEPSNNVKLAATNALLNSLEFTKANFDKESER.[H]	R	4xAcetyl:2H(3) [K1; K9; K24; K29]	Q14974 4xAcetyl:2H(3) [K183; K191; K206; K211]	FALSE	1.02873e-05	0	1	1	14	Q14974	Q14974 [183-215]	0	3888.01	0	0.584	0.781	0.632	0.915733	0.993346	0.921136	0	0	0	133.5	78	104.3	84.3		Peak Found	High	High	High	High	0	1.947e-09	7.25	86.69
FALSE	High	[M].STGGDFGNPLR.[K]	M	1xAcetyl [N-Term]	P20340 1xAcetyl [N-Term]	FALSE	0.0313817	0	1	1	1	P20340	P20340 [2-12]	0	1162.55	0	0.411	0.352	0.798	0.805049	0.867898	0.997471	0	0	0	156.2	64.2	54.9	124.7		High	Peak Found	Peak Found	Peak Found	High	0	0.00134	2.3	38.14
FALSE	High	[R].STGKGIVEFASKPAAR.[K]	R	2xAcetyl:2H(3) [K4; K12]; 1xAcetyl:2H(3) [N-Term]	P23246 2xAcetyl:2H(3) [K413; K421]; 1xAcetyl:2H(3) [N-Term]	FALSE	0.000725295	0	1	1	9	P23246	P23246 [410-425]	0	1753.98	0	0.501	0.382	0.458	0.641283	0.285298	0.483787	0	0	0	170.8	85.6	65.3	78.3		High	High	High	High	High	0	9.439e-06	3.01	49.65
FALSE	High	[R].KEAESSPFVER.[L]	R	1xAcetyl:2H(3) [K1]	P14625 1xAcetyl:2H(3) [K547]	FALSE	0.0227754	0	1	1	7	P14625	P14625 [547-557]	0	1323.66	0	0.904	0.555	1.393	0.960927	0.702409	0.501127	0	0	0	103.9	93.9	57.6	144.7		Peak Found	High	High	High	High	6.911e-05	0.001609	3.69	27.01
FALSE	High	[M].STGPTAATGSNR.[R]	M	1xAcetyl [N-Term]	Q15836 1xAcetyl [N-Term]	FALSE	0.00600766	0	1	1	4	Q15836	Q15836 [2-13]	0	1161.55	0	0.804	0.28	0.393	0.962495	0.779003	0.734956	0	0	0	161.5	129.8	45.3	63.5		High	High	High	Peak Found	High	0	7.934e-05	2.93	16.82
FALSE	High	[R].KDSETGENIR.[Q]	R	1xAcetyl:2H(3) [K1]	P38646 1xAcetyl:2H(3) [K625]	FALSE	0.0186451	0	1	1	2	P38646	P38646 [625-634]	0	1193.58	0	0.334	0.281	0.483	0.601978	0.560588	0.759429	0	0	0	190.7	63.7	53.5	92.1		Peak Found	High	High	Peak Found	High	6.911e-05	0.00177	3.9	17.15
FALSE	High	[R].KDRSDEKSKDR.[S]	R	3xAcetyl:2H(3) [K1; K7; K9]	Q15287 3xAcetyl:2H(3) [K32; K38; K40]	FALSE	0.0172303	0	1	1	1	Q15287	Q15287 [32-42]	1	1498.78	0														No Quan Values	Not Found	Not Found	Not Found	High	High	0	0.0004819	4.16
FALSE	High	[R].KDPSKNQGGGLSSSGAGEGQGPKKQTR.[L]	R	4xAcetyl:2H(3) [K1; K5; K23; K24]	P07814 4xAcetyl:2H(3) [K987; K991; K1009; K1010]	FALSE	0.0173353	0	1	1	1	P07814	P07814 [987-1013]	0	2836.46	0														No Quan Values	High	Not Found	Not Found	Not Found	High	0	0.0004864	2.56
FALSE	High	[E].KDIQDLKFGVEQDVDMVFASFIR.[K]	E	1xOxidation [M16]; 2xAcetyl:2H(3) [K1; K7]; 1xAcetyl:2H(3) [N-Term]	P14618 1xOxidation [M239]; 2xAcetyl:2H(3) [K224; K230]; 1xAcetyl:2H(3) [N-Term]	FALSE	0.0149835	0	1	1	1	P14618	P14618 [224-246]	0	2851.45	0														No Quan Values	Not Found	Not Found	Not Found	High	High	0	0.0003758	2.37
FALSE	High	[M].STGTFVVSQPLNYR.[G]	M	1xAcetyl [N-Term]	P49189 1xAcetyl [N-Term]	FALSE	0.0039904	0	1	1	3	P49189	P49189 [2-15]	0	1610.82	0	0.998	0.371	0.531	0.895813	0.868744	0.90318	0	0	0	137.9	137.6	51.2	73.3		High	High	Peak Found	Peak Found	High	0	0.0003152	4.36	48.79
FALSE	High	[E].STGVFTTMEKAGAHLQGGAKR.[V]	E	2xAcetyl:2H(3) [K10; K20]; 1xAcetyl:2H(3) [N-Term]	P04406 2xAcetyl:2H(3) [K107; K117]; 1xAcetyl:2H(3) [N-Term]	FALSE	2.599e-06	0	1	1	74	P04406	P04406 [98-118]	0	2282.19	0	76.317	77.819	69.639	4.34403e-17	3.7678e-17	4.94188e-17	0	0	0	1.8	135.8	138.5	123.9		Peak Found	High	High	High	High	0	3.585e-10	7.25	54.83
FALSE	High	[R].KDAKSVKIKKNKDNVKFKVR.[C]	R	8xAcetyl:2H(3) [K1; K4; K7; K9; K10; K12; K16; K18]	P63173 8xAcetyl:2H(3) [K18; K21; K24; K26; K27; K29; K33; K35]	FALSE	0.0205455	0	1	1	2	P63173	P63173 [18-37]	0	2733.68	0	0.01	0.01	0.673	4.34403e-17	3.7678e-17	0.963814			0	239.1			160.9		High	Not Found	Not Found	High	High	0	0.0007805	3.92	48.52
FALSE	High	[K].KAVTKVQKKDGKKR.[K]	K	6xAcetyl:2H(3) [K1; K5; K8; K9; K12; K13]; 1xAcetyl:2H(3) [N-Term]	Q5QNW6 6xAcetyl:2H(3) [K17; K21; K24; K25; K28; K29]; 1xAcetyl:2H(3) [N-Term]	FALSE	0.000214832	0	1	1	11	Q5QNW6	Q5QNW6 [17-30]	0	1929.22	0	0.511	0.618	0.698	0.723655	0.820297	0.942957	0	0	0	141.5	72.3	87.4	98.8		High	High	High	Peak Found	High	0	9.89e-06	5.47	38.81
FALSE	High	[K].KAVTKAQKKDGKKR.[K]	K	6xAcetyl:2H(3) [K1; K5; K8; K9; K12; K13]; 1xAcetyl:2H(3) [N-Term]	Q16778 6xAcetyl:2H(3) [K17; K21; K24; K25; K28; K29]; 1xAcetyl:2H(3) [N-Term]; Q6DN03 6xAcetyl:2H(3) [K17; K21; K24; K25; K28; K29]; 1xAcetyl:2H(3) [N-Term]; P58876 6xAcetyl:2H(3) [K17; K21; K24; K25; K28; K29]; 1xAcetyl:2H(3) [N-Term]; Q93079 6xAcetyl:2H(3) [K17; K21; K24; K25; K28; K29]; 1xAcetyl:2H(3) [N-Term]; O60814 6xAcetyl:2H(3) [K17; K21; K24; K25; K28; K29]; 1xAcetyl:2H(3) [N-Term]; Q998…	FALSE	0.000107653	0	7	12	21	Q6DN03; P58876; O60814; Q99880; Q8N257; P23527; Q99877	Q16778 [17-30]; Q6DN03 [17-30]; P58876 [17-30]; Q93079 [17-30]; O60814 [17-30]; Q99880 [17-30]; Q6DRA6 [17-30]; P62807 [17-30]; Q8N257 [17-30]; P06899 [17-30]; P23527 [17-30]; Q99877 [17-30]	0	1901.19	0	0.755	0.816	0.764	0.969906	0.990565	0.985609	0	0	0	119.9	90.5	97.9	91.6	Shared	High	High	High	High	High	0	2.409e-07	5.22	34.75
FALSE	High	[R].KGLKEGIPALDNFLDKL.[-]	R	3xAcetyl:2H(3) [K1; K4; K16]	P13639 3xAcetyl:2H(3) [K842; K845; K857]	FALSE	0.0180878	0	1	1	1	P13639	P13639 [842-858]	0	2006.15	0	100	100	100	4.34403e-17	3.7678e-17	4.94188e-17					68.2	239.7	92.1		Not Found	Peak Found	High	Peak Found	High	0	0.0005195	3.16	85.82
FALSE	High	[E].KGQLGHGDTKR.[V]	E	2xAcetyl:2H(3) [K1; K10]; 1xAcetyl:2H(3) [N-Term]	Q9P258 2xAcetyl:2H(3) [K179; K188]; 1xAcetyl:2H(3) [N-Term]	FALSE	0.0116054	0	1	1	2	Q9P258	Q9P258 [179-189]	0	1331.74	0	21.285	27.645	15.396	0.000210586	0.00364861	0.00180165	0	0	0	6.1	130.3	169.3	94.3		Peak Found	Peak Found	Peak Found	High	High	0	0.0003812	3.67	20.31
FALSE	High	[M].SSSPVNVKKLKVSELKEELKKR.[R]	M	1xAcetyl [N-Term]; 6xAcetyl:2H(3) [K8; K9; K11; K16; K20; K21]	Q00839 1xAcetyl [N-Term]; 6xAcetyl:2H(3) [K9; K10; K12; K17; K21; K22]	FALSE	5.49434e-05	0	1	1	13	Q00839	Q00839 [2-23]	0	2838.68	0	0.013	0.01	0.675	1.51628e-14	3.7678e-17	0.919342	0		0	237	3		160		High	Peak Found	Not Found	High	High	0	7.918e-06	4.59	74.81
FALSE	High	[K].KGSKKAVTKAQKKDGKKR.[K]	K	8xAcetyl:2H(3) [K1; K4; K5; K9; K12; K13; K16; K17]; 1xAcetyl:2H(3) [N-Term]	Q16778 8xAcetyl:2H(3) [K13; K16; K17; K21; K24; K25; K28; K29]; 1xAcetyl:2H(3) [N-Term]; Q6DN03 8xAcetyl:2H(3) [K13; K16; K17; K21; K24; K25; K28; K29]; 1xAcetyl:2H(3) [N-Term]; P58876 8xAcetyl:2H(3) [K13; K16; K17; K21; K24; K25; K28; K29]; 1xAcetyl:2H(3) [N-Term]; Q93079 8xAcetyl:2H(3) [K13; K16; K17; K21; K24; K25; K28; K29]; 1xAcetyl:2H(3) [N-Term]; O60814 8xAcetyl:2H(3) [K13; K16; K17; K21; …	FALSE	1.23585e-05	0	7	12	8	Q6DN03; P58876; O60814; Q99880; Q8N257; P23527; Q99877	Q16778 [13-30]; Q6DN03 [13-30]; P58876 [13-30]; Q93079 [13-30]; O60814 [13-30]; Q99880 [13-30]; Q6DRA6 [13-30]; P62807 [13-30]; Q8N257 [13-30]; P06899 [13-30]; P23527 [13-30]; Q99877 [13-30]	0	2391.49	0	0.825	0.896	0.812	0.994056	0.971112	0.99558	0	0	0	113.2	93.5	101.4	91.9	Shared	High	High	High	High	High	0	1.281e-08	5.45	38.21
FALSE	High	[R].SSHYDELLAAEAR.[A]	R	1xAcetyl:2H(3) [N-Term]	Q7KZF4 1xAcetyl:2H(3) [N-Term]	FALSE	0.00440008	0	1	1	3	Q7KZF4	Q7KZF4 [473-485]	0	1506.73	0	0.197	0.099	0.385	0.184918	0.077285	0.512021	0	0	0	237.9	46.9	23.6	91.7		High	Peak Found	Peak Found	High	High	0	0.0001261	4.81	39.43
FALSE	High	[Y].KIGGIGTVPVGR.[V]	Y	1xAcetyl:2H(3) [K1]; 1xAcetyl:2H(3) [N-Term]	Q05639 1xAcetyl:2H(3) [K255]; 1xAcetyl:2H(3) [N-Term]; P68104 1xAcetyl:2H(3) [K255]; 1xAcetyl:2H(3) [N-Term]; Q5VTE0 1xAcetyl:2H(3) [K255]; 1xAcetyl:2H(3) [N-Term]	FALSE	0.0201751	0	1	3	9	P68104	Q05639 [255-266]; P68104 [255-266]; Q5VTE0 [255-266]	0	1243.76	0	0.26	0.366	0.489	0.0785369	0.24927	0.576177	0	0	0	189.1	49.2	69.3	92.5		High	High	Peak Found	High	High	0.0002176	0.004939	3.16	44.58
FALSE	High	[F].SSMAEVDAAMAARPHSIDGR.[V]	F	1xAcetyl:2H(3) [N-Term]	P22626 1xAcetyl:2H(3) [N-Term]	FALSE	0.000653699	0	1	1	3	P22626	P22626 [70-89]	0	2116.99	0	0.31	0.493	0.112	0.633666	0.94872	0.0561495	0	0	0	209	64.7	102.9	23.4		High	Peak Found	Peak Found	Peak Found	High	0	1.825e-06	3.52	41.35
FALSE	High	[R].KIEEIKDFLLTAR.[R]	R	2xAcetyl:2H(3) [K1; K6]; 1xAcetyl:2H(3) [N-Term]	P63173 2xAcetyl:2H(3) [K4; K9]; 1xAcetyl:2H(3) [N-Term]	FALSE	0.00198846	0	1	1	3	P63173	P63173 [4-16]	0	1711	0	0.01	0.372	0.01	4.34403e-17	0.908672	4.94188e-17		0		291.4		108.6			Peak Found	Not Found	High	High	High	0	1.872e-05	3.64	89.72
FALSE	High	[R].KLDPGSEETQTLVR.[E]	R	1xAcetyl:2H(3) [K1]	P26641 1xAcetyl:2H(3) [K401]	FALSE	0.000960818	0	1	1	4	P26641	P26641 [401-414]	0	1617.85	0	0.408	0.888	0.581	0.617124	0.977302	0.858779	0	0	0	139	56.8	123.4	80.8		Peak Found	High	High	Peak Found	High	0	3.673e-06	4.02	32.01
FALSE	High	[E].KLDITTLTGVPEEHIKTR.[K]	E	2xAcetyl:2H(3) [K1; K16]; 1xAcetyl:2H(3) [N-Term]	O43181 2xAcetyl:2H(3) [K58; K73]; 1xAcetyl:2H(3) [N-Term]	FALSE	5.52804e-05	0	1	1	11	O43181	O43181 [58-75]	0	2186.24	0	100	100	100	4.34403e-17	3.7678e-17	4.94188e-17					148.1	135.1	116.8		Not Found	Peak Found	High	High	High	0	1.172e-06	5.43	55.8
FALSE	High	[R].KLAVNMVPFPR.[L]	R	1xAcetyl:2H(3) [K1]; 1xAcetyl:2H(3) [N-Term]	Q13885 1xAcetyl:2H(3) [K252]; 1xAcetyl:2H(3) [N-Term]; Q13509 1xAcetyl:2H(3) [K252]; 1xAcetyl:2H(3) [N-Term]; Q9H4B7 1xAcetyl:2H(3) [K252]; 1xAcetyl:2H(3) [N-Term]; P04350 1xAcetyl:2H(3) [K252]; 1xAcetyl:2H(3) [N-Term]; A6NNZ2 1xAcetyl:2H(3) [K252]; 1xAcetyl:2H(3) [N-Term]; Q9BUF5 1xAcetyl:2H(3) [K252]; 1xAcetyl:2H(3) [N-Term]; Q3ZCM7 1xAcetyl:2H(3) [K252]; 1xAcetyl:2H(3) [N-Term]; P07437 1xAcety…	FALSE	0.00310625	0	3	10	12	Q9BUF5; Q3ZCM7; P07437	Q13885 [252-262]; Q13509 [252-262]; Q9H4B7 [252-262]; P04350 [252-262]; A6NNZ2 [252-262]; Q9BUF5 [252-262]; Q3ZCM7 [252-262]; P07437 [252-262]; P68371 [252-262]; Q9BVA1 [252-262]	0	1361.79	0	0.861	0.762	0.616	0.977631	0.959081	0.854985	0	0	0	123.5	106.3	94.1	76.1	Shared	High	High	High	High	High	0	0.0001039	3.29	62.69
FALSE	High	[R].KIAFAITAIKGVGR.[R]	R	2xAcetyl:2H(3) [K1; K10]; 1xAcetyl:2H(3) [N-Term]	P62269 2xAcetyl:2H(3) [K25; K34]; 1xAcetyl:2H(3) [N-Term]	FALSE	0.000694911	0	1	1	8	P62269	P62269 [25-38]	0	1579.99	0	1.332	1.161	0.523	0.76089	0.890526	0.888954	0	0	0	99.6	132.6	115.6	52.1		Peak Found	High	High	Peak Found	High	0	2.009e-06	3.82	80.19
FALSE	High	[R].KKQVAPEKPVKKQKTGETSR.[A]	R	6xAcetyl:2H(3) [K1; K2; K8; K11; K12; K14]	P53999 6xAcetyl:2H(3) [K28; K29; K35; K38; K39; K41]	FALSE	0.00708374	0	1	1	1	P53999	P53999 [28-47]	0	2537.5	0	0.01	0.01	0.707	4.34403e-17	3.7678e-17	0.985609			0	234.3			165.7		High	Not Found	Not Found	Peak Found	High	0	0.0001052	2.95	31.89
FALSE	High	[E].KKPKKEVKKKR.[W]	E	7xAcetyl:2H(3) [K1; K2; K4; K5; K8; K9; K10]; 1xAcetyl:2H(3) [N-Term]	P46777 7xAcetyl:2H(3) [K255; K256; K258; K259; K262; K263; K264]; 1xAcetyl:2H(3) [N-Term]	FALSE	0.0102747	0	1	1	5	P46777	P46777 [255-265]	0	1757.18	0	100	100	100	4.34403e-17	3.7678e-17	4.94188e-17					101.6	97	201.4		Not Found	Peak Found	Peak Found	High	High	0	0.000198	3.2	35.57
FALSE	High	[F].SSPEEATKAVTEMNGR.[I]	F	1xAcetyl:2H(3) [K8]; 1xAcetyl:2H(3) [N-Term]	Q9H361 1xAcetyl:2H(3) [K348]; 1xAcetyl:2H(3) [N-Term]; Q13310 1xAcetyl:2H(3) [K348]; 1xAcetyl:2H(3) [N-Term]; P11940 1xAcetyl:2H(3) [K348]; 1xAcetyl:2H(3) [N-Term]; Q4VXU2 1xAcetyl:2H(3) [K348]; 1xAcetyl:2H(3) [N-Term]	FALSE	0.027643	0	2	4	2	P11940; Q4VXU2	Q9H361 [341-356]; Q13310 [341-356]; P11940 [341-356]; Q4VXU2 [341-356]	0	1796.86	0	0.599	0.19	0.702	0.95579	0.559792	0.981643	0	0	0	160.6	96.1	30.5	112.8	Shared	Peak Found	Peak Found	High	High	High	0	0.001078	2.81	42.65
FALSE	High	[R].KASGPPVSELITKAVAASKER.[S]	R	3xAcetyl:2H(3) [K1; K13; K19]; 1xAcetyl:2H(3) [N-Term]	P16402 3xAcetyl:2H(3) [K35; K47; K53]; 1xAcetyl:2H(3) [N-Term]; P10412 3xAcetyl:2H(3) [K34; K46; K52]; 1xAcetyl:2H(3) [N-Term]; P16403 3xAcetyl:2H(3) [K34; K46; K52]; 1xAcetyl:2H(3) [N-Term]	FALSE	0.000367944	0	3	3	9	P16402; P10412; P16403	P16402 [35-55]; P10412 [34-54]; P16403 [34-54]	0	2319.33	0	0.818	0.912	1.041	0.997479	0.9635	0.862984	0	0	0	106.1	86.8	96.8	110.4	Shared	High	High	High	Peak Found	High	0	6.371e-05	4.42	74.52
FALSE	High	[S].SSPVIFAGGQDR.[Y]	S	1xAcetyl:2H(3) [N-Term]	Q15366 1xAcetyl:2H(3) [N-Term]	FALSE	0.0154457	0	1	1	21	Q15366	Q15366 [188-199]	0	1278.65	0	1.241	0.868	0.962	0.725084	0.987162	0.919342	0	0	0	98.3	121.9	85.3	94.6		High	High	High	High	High	0	0.0008262	3.96	38.7
FALSE	High	[R].KKGAKLTPEEEEILNKKR.[S]	R	5xAcetyl:2H(3) [K1; K2; K5; K16; K17]	P62241 5xAcetyl:2H(3) [K124; K125; K128; K139; K140]	FALSE	2.92682e-05	0	1	1	6	P62241	P62241 [124-141]	0	2336.37	0	0.686	1.166	0.744	0.990364	0.905407	0.987852	0	0	0	111.2	76.3	129.7	82.8		High	High	High	Peak Found	High	0	4.451e-08	4.97	46.56
FALSE	High	[R].KKEEEEKEKER.[V]	R	4xAcetyl:2H(3) [K1; K2; K7; K9]	Q15459 4xAcetyl:2H(3) [K258; K259; K264; K266]	FALSE	0.00893106	0	1	1	12	Q15459	Q15459 [258-268]	0	1641.87	0	3.742	4.507	4.812	0.186934	0.298879	0.0607146	0	0	0	28.4	106.5	128.2	136.9		Peak Found	High	High	High	High	0	0.0007586	4.24	19.71
FALSE	High	[R].KHTGGKILGFFF.[-]	R	2xAcetyl:2H(3) [K1; K6]	P62244 2xAcetyl:2H(3) [K119; K124]	FALSE	0.017126	0	1	1	1	P62244	P62244 [119-130]	0	1441.81	0	0.091	0.235	0.01	0.0174097	0.390376	4.94188e-17	0	0		301.5	27.5	71			High	Peak Found	Peak Found	Not Found	High	0	0.0004752	2.24	70.78
FALSE	High	[R].KHKKGQSEEIQKKR.[T]	R	5xAcetyl:2H(3) [K1; K3; K4; K12; K13]	P83731 5xAcetyl:2H(3) [K58; K60; K61; K69; K70]	FALSE	8.17571e-05	0	1	1	11	P83731	P83731 [58-71]	0	1949.14	0	0.582	0.384	0.472	0.856643	0.547878	0.659909	0	0	0	164.1	95.4	63	77.5		High	High	High	Peak Found	High	0	5.306e-08	4.83	21.1
FALSE	High	[R].KHKKDISQNKR.[A]	R	4xAcetyl:2H(3) [K1; K3; K4; K10]	P0DMV9 4xAcetyl:2H(3) [K248; K250; K251; K257]; P34931 4xAcetyl:2H(3) [K250; K252; K253; K259]	FALSE	0.0127923	0	1	2	4	P0DMV9	P0DMV9 [248-258]; P34931 [250-260]	0	1561.92	0	0.371	0.067	0.19	0.300636	6.70104e-06	0.00623113	0	0	0	245.6	91.2	16.6	46.6		High	High	High	High	High	0	0.001306	4.02	19.02
FALSE	High	[R].KHKKDISENKR.[A]	R	4xAcetyl:2H(3) [K1; K3; K4; K10]	P11142 4xAcetyl:2H(3) [K248; K250; K251; K257]	FALSE	0.0101503	0	1	1	6	P11142	P11142 [248-258]	0	1562.9	0	1.22	0.41	0.529	0.744139	0.353029	0.680365	0	0	0	126.6	154.5	52	67		High	High	Peak Found	High	High	0	0.001287	4.34	19.85
FALSE	High	[R].KHGLEVIYMIEPIDE.[Y]	R	1xAcetyl:2H(3) [K1]	P07900 1xAcetyl:2H(3) [K513]	FALSE	0.00932033	0	1	1	8	P07900	P07900 [513-527]	0	1830.94	0	4.236	0.863	11.416	0.102004	0.945572	0.00058685	0	0	0	22.8	96.7	19.7	260.7		Peak Found	High	Peak Found	High	High	0	0.0007664	3.37	62.57
FALSE	High	[R].KHEAKKAAKQEAR.[S]	R	4xAcetyl:2H(3) [K1; K5; K6; K9]	Q9BY44 4xAcetyl:2H(3) [K490; K494; K495; K498]	FALSE	0.00482222	0	1	1	2	Q9BY44	Q9BY44 [490-502]	0	1674.97	0	0.822	0.2	0.6	0.964291	0.590372	0.942957	0	0	0	152.5	125.4	30.5	91.6		High	High	Peak Found	Peak Found	High	0	0.0006749	4.33	18.2
FALSE	High	[R].KGVITVKDGKTLNDELEIIEGMKFDR.[G]	R	4xAcetyl:2H(3) [K1; K7; K10; K23]	P10809 4xAcetyl:2H(3) [K196; K202; K205; K218]	FALSE	0.00437329	0	1	1	2	P10809	P10809 [196-221]	0	3128.69	0	0.01	0.01	7.142	4.34403e-17	3.7678e-17	0.0194692			0	49.1			350.9		Peak Found	Not Found	Not Found	High	High	0	0.0001297	5.12	75.34
FALSE	High	[R].KGVKAVDPKTGR.[E]	R	3xAcetyl:2H(3) [K1; K4; K9]	P34897 3xAcetyl:2H(3) [K294; K297; K302]	FALSE	0.0145349	0	1	1	2	P34897	P34897 [294-305]	0	1390.84	0	0.568	1.293	0.822	0.943146	0.860524	0.987852	0	0	0	108.6	61.7	140.5	89.3		Peak Found	High	Peak Found	Peak Found	High	0.0002176	0.006287	3.95	24.93
FALSE	High	[R].KGTEVQVDDIKR.[V]	R	2xAcetyl:2H(3) [K1; K11]	Q9Y230 2xAcetyl:2H(3) [K417; K427]	FALSE	0.00670524	0	1	1	2	Q9Y230	Q9Y230 [417-428]	0	1477.81	0	1.267	0.626	4.653	0.780789	0.998256	0.0989646	0	0	0	53	67.2	33.2	246.7		Peak Found	High	Peak Found	Peak Found	High	0	9.616e-05	3.81	32.12
FALSE	High	[R].SSSEDKITVHFINR.[D]	R	1xAcetyl:2H(3) [K6]; 1xAcetyl:2H(3) [N-Term]	P10109 1xAcetyl:2H(3) [K66]; 1xAcetyl:2H(3) [N-Term]	FALSE	0.0131074	0	1	1	1	P10109	P10109 [61-74]	0	1722.89	0	0.52	0.476	0.629	0.89185	0.871623	0.919342	0	0	0	152.3	79.2	72.5	95.9		High	Peak Found	Peak Found	Peak Found	High	0	0.0002999	4.55	45.3
FALSE	High	[E].KLYASYEKQGR.[V]	E	2xAcetyl:2H(3) [K1; K8]; 1xAcetyl:2H(3) [N-Term]	P23921 2xAcetyl:2H(3) [K369; K376]; 1xAcetyl:2H(3) [N-Term]	FALSE	0.0093773	0	1	1	1	P23921	P23921 [369-379]	0	1477.8	0	20.849	11.459	20.702	0.000518983	0.0895749	0.000301462	0	0	0	7.4	154.4	84.9	153.3		Peak Found	Peak Found	High	Peak Found	High	0	0.0001696	3.45	41.85
FALSE	High	[R].KASGPPVSELITKAVAASKER.[S]	R	3xAcetyl:2H(3) [K1; K13; K19]	P16402 3xAcetyl:2H(3) [K35; K47; K53]; P10412 3xAcetyl:2H(3) [K34; K46; K52]; P16403 3xAcetyl:2H(3) [K34; K46; K52]	FALSE	0.00497173	0	3	3	3	P16402; P10412; P16403	P16402 [35-55]; P10412 [34-54]; P16403 [34-54]	0	2274.3	0	0.757	1.339	0.582	0.994056	0.801709	0.886606	0	0	0	108.7	82.3	145.6	63.3	Shared	Peak Found	High	Peak Found	High	High	0	0.001218	4.34	66.18
FALSE	High	[E].STGVFTTMEKAGAHLQGGAKR.[V]	E	1xOxidation [M8]; 2xAcetyl:2H(3) [K10; K20]; 1xAcetyl:2H(3) [N-Term]	P04406 1xOxidation [M105]; 2xAcetyl:2H(3) [K107; K117]; 1xAcetyl:2H(3) [N-Term]	FALSE	6.56034e-05	0	1	1	9	P04406	P04406 [98-118]	0	2298.19	0	100	100	100	4.34403e-17	3.7678e-17	4.94188e-17					192.5	126.9	80.5		Not Found	High	High	High	High	0	3.639e-08	5.57	37.87
FALSE	High	[E].GVKFDESEKTKESR.[E]	E	3xAcetyl:2H(3) [K3; K9; K11]; 1xAcetyl:2H(3) [N-Term]	P14625 3xAcetyl:2H(3) [K597; K603; K605]; 1xAcetyl:2H(3) [N-Term]	FALSE	0.00290435	0	1	1	7	P14625	P14625 [595-608]	0	1819.95	0	41.871	47.124	24.384	4.80254e-06	0.00184932	0.000199939	0	0	0	3.5	146.4	164.8	85.3		Peak Found	High	High	High	High	0	0.0002328	4.52	37.61
FALSE	High	[Q].GVDLLADAVAVTMGPKGR.[T]	Q	1xOxidation [M13]; 1xAcetyl:2H(3) [K16]	P10809 1xOxidation [M55]; 1xAcetyl:2H(3) [K58]	FALSE	0.0261785	0	1	1	6	P10809	P10809 [43-60]	0	1830.98	0			100			4.94188e-17							400		Not Found	Not Found	Not Found	High	High	0	0.0009856	3.6	98.85
FALSE	High	[R].SVKALADYIR.[Q]	R	1xAcetyl:2H(3) [K3]; 1xAcetyl:2H(3) [N-Term]	Q9BS26 1xAcetyl:2H(3) [K130]; 1xAcetyl:2H(3) [N-Term]	FALSE	0.0159222	0	1	1	5	Q9BS26	Q9BS26 [128-137]	0	1225.71	0	1.113	1.155	0.955	0.859976	0.905407	0.963108	0	0	0	94.7	105.4	109.4	90.5		High	Peak Found	High	High	High	0.0001879	0.003006	3.62	60.63
FALSE	High	[E].GVAIGGDRYPGSTFMDHVLR.[Y]	E	1xAcetyl:2H(3) [N-Term]	P53396 1xAcetyl:2H(3) [N-Term]	FALSE	0.00384679	0	1	1	1	P53396	P53396 [684-703]	1	2193.09	0	100	100	100	4.34403e-17	3.7678e-17	4.94188e-17					219.3	136	44.6		Not Found	High	Peak Found	Peak Found	High	0	3.708e-05	4.76	53.82
FALSE	High	[R].SVLDAAQIVGLN.[C]	R	1xAcetyl:2H(3) [N-Term]	Q92598 1xAcetyl:2H(3) [N-Term]	FALSE	0.0278106	0	1	1	1	Q92598	Q92598 [155-166]	0	1244.69	0	1.258	0.08	1.147	0.787839	0.280485	0.90318	0	0	0	114.7	144.3	9.2	131.7		Peak Found	High	Peak Found	Peak Found	High	0	0.001093	2.49	71.47
FALSE	High	[R].GTKVILHLKEDQTEYLEERR.[IV]	R	2xAcetyl:2H(3) [K3; K9]; 1xAcetyl:2H(3) [N-Term]	P07900 2xAcetyl:2H(3) [K185; K191]; 1xAcetyl:2H(3) [N-Term]; P08238 2xAcetyl:2H(3) [K180; K186]; 1xAcetyl:2H(3) [N-Term]; Q58FF7 2xAcetyl:2H(3) [K159; K165]; 1xAcetyl:2H(3) [N-Term]	FALSE	0.0100273	0	2	3	2	P07900; P08238	P07900 [183-202]; P08238 [178-197]; Q58FF7 [157-176]	1	2592.4	0	2.734	3.941	4.046	0.253623	0.255678	0.0595632	0	0	0	34.1	93.3	134.5	138.1	Shared	Peak Found	High	High	Peak Found	High	0	0.0002332	4.94	58.73
FALSE	High	[R].GTKVILHLKEDQTEYLEER.[R]	R	2xAcetyl:2H(3) [K3; K9]; 1xAcetyl:2H(3) [N-Term]	P07900 2xAcetyl:2H(3) [K185; K191]; 1xAcetyl:2H(3) [N-Term]; P08238 2xAcetyl:2H(3) [K180; K186]; 1xAcetyl:2H(3) [N-Term]; Q58FF7 2xAcetyl:2H(3) [K159; K165]; 1xAcetyl:2H(3) [N-Term]	FALSE	0.000102513	0	2	3	23	P07900; P08238	P07900 [183-201]; P08238 [178-196]; Q58FF7 [157-175]	0	2436.3	0	0.145	0.088	1.46	0.00337515	6.72417e-05	0.43636	0	0	0	148.5	21.5	13	216.9	Shared	High	Peak Found	High	High	High	0	7.845e-08	6.69	63.88
FALSE	High	[L].GTHPKKEPMEALNTAQGAR.[D]	L	2xAcetyl:2H(3) [K5; K6]; 1xAcetyl:2H(3) [N-Term]	Q6PI78 2xAcetyl:2H(3) [K59; K60]; 1xAcetyl:2H(3) [N-Term]	FALSE	0.00141215	0	1	1	1	Q6PI78	Q6PI78 [55-73]	0	2171.12	0	0.556	0.563	0.582	0.937856	0.968684	0.919342	0	0	0	148.1	82.4	83.3	86.2		High	Peak Found	Peak Found	Peak Found	High	0	6.75e-06	4.84	37.62
FALSE	High	[R].GTGDVKLLKHKEKGAIR.[L]	R	4xAcetyl:2H(3) [K6; K9; K11; K13]; 1xAcetyl:2H(3) [N-Term]	P43487 4xAcetyl:2H(3) [K76; K79; K81; K83]; 1xAcetyl:2H(3) [N-Term]	FALSE	5.46085e-05	0	1	1	10	P43487	P43487 [71-87]	0	2075.24	0	1.984	1.837	2.092	0.215423	0.287824	0.109973	0	0	0	57.9	114.8	106.3	121.1		High	High	High	High	High	0	2.408e-05	5.6	48.41
FALSE	High	[E].GSESAPEGQAQQR.[R]	E	1xAcetyl:2H(3) [N-Term]	P67809 1xAcetyl:2H(3) [N-Term]	FALSE	0.0227754	0	1	1	5	P67809	P67809 [173-185]	0	1389.64	0	100	100	100	4.34403e-17	3.7678e-17	4.94188e-17					178.8	119.6	101.5		Not Found	High	High	High	High	0	0.0009449	2.69	16.52
FALSE	High	[E].GSASDTHEQAILR.[L]	E	1xAcetyl:2H(3) [N-Term]	P04844 1xAcetyl:2H(3) [N-Term]	FALSE	0.0239062	0	1	1	1	P04844	P04844 [277-289]	0	1429.71	0	100	100	100	4.34403e-17	3.7678e-17	4.94188e-17					218.9	64.5	116.6		Not Found	High	Peak Found	Peak Found	High	0	0.0008429	4.04	25.76
FALSE	High	[E].GQLQNEEIVAHDGSATYLR.[F]	E	1xAcetyl:2H(3) [N-Term]	Q9Y547 1xAcetyl:2H(3) [N-Term]	FALSE	4.73203e-06	0	1	1	4	Q9Y547	Q9Y547 [98-116]	0	2146.06	0	100	100	100	4.34403e-17	3.7678e-17	4.94188e-17					144.7	88.9	166.4		Not Found	Peak Found	Peak Found	High	High	0	5.438e-10	6.05	42.46
FALSE	High	[R].GQIKQKKKTVPQKVTIAKIPR.[A]	R	6xAcetyl:2H(3) [K4; K6; K7; K8; K13; K18]; 1xAcetyl:2H(3) [N-Term]	O43583 6xAcetyl:2H(3) [K105; K107; K108; K109; K114; K119]; 1xAcetyl:2H(3) [N-Term]	FALSE	0.00565189	0	1	1	5	O43583	O43583 [102-122]	0	2704.72	0	100	100	100	4.34403e-17	3.7678e-17	4.94188e-17					113.7	86.6	199.7		Not Found	High	Peak Found	High	High	0	0.0009123	3.34	55.53
FALSE	High	[E].GQGTAGEEEEKKKQKR.[G]	E	4xAcetyl:2H(3) [K11; K12; K13; K15]; 1xAcetyl:2H(3) [N-Term]	O43583 4xAcetyl:2H(3) [K93; K94; K95; K97]; 1xAcetyl:2H(3) [N-Term]	FALSE	0.000271025	0	1	1	18	O43583	O43583 [83-98]	0	2028.08	0	100	100	100	4.34403e-17	3.7678e-17	4.94188e-17					138	115.5	146.6		Not Found	High	High	High	High	0	1.391e-06	4.87	27.77
FALSE	High	[R].GPIKFNVWDTAGQEKFGGLR.[D]	R	2xAcetyl:2H(3) [K4; K15]; 1xAcetyl:2H(3) [N-Term]	P62826 2xAcetyl:2H(3) [K60; K71]; 1xAcetyl:2H(3) [N-Term]	FALSE	1.45769e-05	0	1	1	15	P62826	P62826 [57-76]	0	2355.24	0	0.979	0.99	0.697	0.920178	0.935097	0.940733	0	0	0	109.1	106.8	108	76		High	High	High	High	High	0	1.313e-07	4.98	71.26
FALSE	High	[M].GNIFANLFKGLFGKKEMR.[I]	M	1xAcetyl [N-Term]; 1xOxidation [M17]; 3xAcetyl:2H(3) [K9; K14; K15]	P84077 1xAcetyl [N-Term]; 1xOxidation [M18]; 3xAcetyl:2H(3) [K10; K15; K16]	FALSE	0.000972636	0	1	1	1	P84077	P84077 [2-19]	0	2263.23	0			100			4.94188e-17							400		Not Found	Not Found	Not Found	High	High	0	3.56e-06	4.65	98.34
FALSE	High	[M].GNIFANLFKGLFGKKEMR.[I]	M	1xAcetyl [N-Term]; 3xAcetyl:2H(3) [K9; K14; K15]	P84077 1xAcetyl [N-Term]; 3xAcetyl:2H(3) [K10; K15; K16]	FALSE	0.00682911	0	1	1	1	P84077	P84077 [2-19]	0	2247.23	0	0.01	0.445	0.814	4.34403e-17	0.951456	0.99558		0	0	177		78.8	144.1		Peak Found	Not Found	Peak Found	High	High	0	9.897e-05	3.78	101.03
FALSE	High	[R].SVLLLAYKPMEGNFEEIAR.[D]	R	1xAcetyl:2H(3) [K8]; 1xAcetyl:2H(3) [N-Term]	Q16531 1xAcetyl:2H(3) [K936]; 1xAcetyl:2H(3) [N-Term]	FALSE	0.0011684	0	1	1	5	Q16531	Q16531 [929-947]	0	2270.2	0	0.01	0.01	0.461	4.34403e-17	3.7678e-17	0.725918	0		0	272.1	2.5		125.4		High	Peak Found	Not Found	High	High	0	4.868e-06	4.01	82.1
FALSE	High	[R].GMGTALKLLLGAGAVAYGVR.[E]	R	1xAcetyl:2H(3) [K7]; 1xAcetyl:2H(3) [N-Term]	Q99623 1xAcetyl:2H(3) [K24]; 1xAcetyl:2H(3) [N-Term]	FALSE	1.60223e-07	0	1	1	13	Q99623	Q99623 [18-37]	0	2008.15	0	0.884	0.748	0.689	0.9409	0.985601	0.985609	0	0	0	120.4	106.5	90.1	83		High	High	High	High	High	0	8.605e-10	5.78	94.28
FALSE	High	[R].GIYAYGFEKPSAIQQR.[A]	R	1xAcetyl:2H(3) [K9]; 1xAcetyl:2H(3) [N-Term]	P60842 1xAcetyl:2H(3) [K54]; 1xAcetyl:2H(3) [N-Term]; P38919 1xAcetyl:2H(3) [K60]; 1xAcetyl:2H(3) [N-Term]; Q14240 1xAcetyl:2H(3) [K55]; 1xAcetyl:2H(3) [N-Term]	FALSE	0.000882009	0	3	3	6	P60842; P38919; Q14240	P60842 [46-61]; P38919 [52-67]; Q14240 [47-62]	0	1918	0	0.791	0.584	0.88	0.988338	0.75981	0.966123	0	0	0	122.9	97.2	71.8	108.1	Shared	High	High	High	Peak Found	High	0	3.02e-06	4.23	55.83
FALSE	High	[R].GIWHNDNKTFLVWVNEEDHLR.[V]	R	1xAcetyl:2H(3) [K8]; 1xAcetyl:2H(3) [N-Term]	P12277 1xAcetyl:2H(3) [K223]; 1xAcetyl:2H(3) [N-Term]	FALSE	2.4363e-05	0	1	1	3	P12277	P12277 [216-236]	0	2712.34	0	0.811	0.663	0.838	0.996243	0.878498	0.987852	0	0	0	120.8	98	80	101.2		High	High	High	Peak Found	High	0	6.775e-09	6.86	65.28
FALSE	High	[E].GIVTATEQEVKEDIAKLLR.[Y]	E	2xAcetyl:2H(3) [K11; K16]; 1xAcetyl:2H(3) [N-Term]	Q12931 2xAcetyl:2H(3) [K461; K466]; 1xAcetyl:2H(3) [N-Term]	FALSE	7.78541e-05	0	1	1	12	Q12931	Q12931 [451-469]	0	2248.27	0	9.918	10.232	11.907	0.0107898	0.0756092	0.00358166	0	0	0	12.1	120	123.8	144.1		Peak Found	High	High	High	High	0	4.859e-08	4.02	102.02
FALSE	High	[E].GLVLTQKVSNSGITR.[V]	E	1xAcetyl:2H(3) [K7]; 1xAcetyl:2H(3) [N-Term]	P50991 1xAcetyl:2H(3) [K232]; 1xAcetyl:2H(3) [N-Term]	FALSE	0.0014649	0	1	1	18	P50991	P50991 [226-240]	0	1662.97	0	22.959	21.396	18.828	1.3302e-09	3.58467e-09	6.32273e-11	0	0	0	6.2	143.1	133.3	117.3		Peak Found	High	High	High	High	0	7.173e-06	4.89	53.45
FALSE	High	[R].GVLKVFLENVIR.[D]	R	1xAcetyl:2H(3) [K4]	P62805 1xAcetyl:2H(3) [K60]	FALSE	0.000747807	0	1	1	26	P62805	P62805 [57-68]	0	1431.88	0	0.393	1.51	1.297	0.356483	0.492481	0.604419	0	0	0	95.2	37.4	143.8	123.5		High	High	High	High	High	0	2.636e-05	5.89	74.95
FALSE	High	[R].GVLKVFLENVIR.[D]	R	1xAcetyl:2H(3) [K4]; 1xAcetyl:2H(3) [N-Term]	P62805 1xAcetyl:2H(3) [K60]; 1xAcetyl:2H(3) [N-Term]	FALSE	0.00500218	0	1	1	44	P62805	P62805 [57-68]	0	1476.91	0	1.468	1.808	2.417	0.518207	0.300774	0.0535295	0	0	0	59.8	87.7	108.1	144.4		High	High	High	High	High	0.002517	0.03103	3.85	101.75
FALSE	High	[M].GVQVETISPGDGR.[T]	M	1xAcetyl:2H(3) [N-Term]	P62942 1xAcetyl:2H(3) [N-Term]	FALSE	0.00548197	0	1	1	39	P62942	P62942 [2-14]	0	1359.69	0	0.649	0.539	0.883	0.888572	0.665234	0.965626	0	0	0	130.2	84.6	70.2	115		High	High	High	High	High	0	0.0005748	2.99	35.03
FALSE	High	[RH].GVVDSEDIPLNLSR.[E]	R			FALSE	0.00228853	0	3	4	4	P07900; P08238; Q12931	P07900 [387-400]; P08238 [379-392]; Q12931 [389-402]; Q58FF7 [321-334]	0	1513.79	0	23.539	65.874	13.472	0.000259387	1.1711e-05	0.00640424	0	0	0	3.9	90.6	253.6	51.9	Shared	Peak Found	Peak Found	High	High	High	0	0.0001024	4.72	43.57
FALSE	High	[E].KALLVQVVNKLGDPQNR.[I]	E	2xAcetyl:2H(3) [K1; K10]; 1xAcetyl:2H(3) [N-Term]	Q03701 2xAcetyl:2H(3) [K381; K390]; 1xAcetyl:2H(3) [N-Term]	FALSE	0.0310052	0	1	1	3	Q03701	Q03701 [381-397]	0	2027.2	0			100			4.94188e-17							400		Not Found	Not Found	Not Found	High	High	0	0.00131	3.19	88
FALSE	High	[R].KAIIIFVPVPQLKSFQKIQVR.[L]	R	3xAcetyl:2H(3) [K1; K13; K17]	P62081 3xAcetyl:2H(3) [K58; K70; K74]	FALSE	0.000699172	0	1	1	13	P62081	P62081 [58-78]	0	2587.6	0	0.485	1.044	1.006	0.855999	0.93788	0.926734	0	0	0	113.1	54.8	118.2	113.9		High	Peak Found	High	High	High	0	3.511e-06	4.51	73.79
FALSE	High	[R].STLEPVEKALR.[D]	R	1xAcetyl:2H(3) [K8]	P48741 1xAcetyl:2H(3) [K321]; P17066 1xAcetyl:2H(3) [K321]; P0DMV9 1xAcetyl:2H(3) [K319]	FALSE	0.0308186	0	2	3	19	P17066; P0DMV9	P48741 [314-324]; P17066 [314-324]; P0DMV9 [312-322]	0	1287.73	0	0.902	0.996	1.531	0.960927	0.928986	0.378218	0	0	0	90.3	81.5	89.9	138.3	Shared	Peak Found	High	High	High	High	0.001723	0.024	3.2	39.34
FALSE	High	[E].KALKHMDGGQIDGQEITATAVLAPWPRPPPR.[R]	E	2xAcetyl:2H(3) [K1; K4]; 1xAcetyl:2H(3) [N-Term]	Q15287 2xAcetyl:2H(3) [K218; K221]; 1xAcetyl:2H(3) [N-Term]	FALSE	0.000136644	0	1	1	3	Q15287	Q15287 [218-248]	0	3485.87	0		100	100		3.7678e-17	4.94188e-17						131.6	268.4		Not Found	Not Found	High	Peak Found	High	0	3.069e-06	4.57	60.93
FALSE	High	[CV].KAGFAGDDAPR.[A]	C	1xAcetyl:2H(3) [K1]; 1xAcetyl:2H(3) [N-Term]	A5A3E0 1xAcetyl:2H(3) [K718]; 1xAcetyl:2H(3) [N-Term]; P63267 1xAcetyl:2H(3) [K19]; 1xAcetyl:2H(3) [N-Term]; P0CG39 1xAcetyl:2H(3) [K681]; 1xAcetyl:2H(3) [N-Term]; P60709 1xAcetyl:2H(3) [K18]; 1xAcetyl:2H(3) [N-Term]; Q6S8J3 1xAcetyl:2H(3) [K718]; 1xAcetyl:2H(3) [N-Term]; P62736 1xAcetyl:2H(3) [K20]; 1xAcetyl:2H(3) [N-Term]; P68133 1xAcetyl:2H(3) [K20]; 1xAcetyl:2H(3) [N-Term]; P0CG38 1xAcetyl:2H…	FALSE	0.00448145	0	3	10	31	P60709; Q6S8J3; P63261	A5A3E0 [718-728]; P63267 [19-29]; P0CG39 [681-691]; P60709 [18-28]; Q6S8J3 [718-728]; P62736 [20-30]; P68133 [20-30]; P0CG38 [718-728]; P68032 [20-30]; P63261 [18-28]	0	1194.6	0	0.718	0.88	0.616	0.94673	0.981063	0.854985	0	0	0	124.4	89.4	109.5	76.7	Shared	High	High	High	High	High	0	0.0001722	3.31	30.24
FALSE	High	[R].KADIDLTKR.[A]	R	2xAcetyl:2H(3) [K1; K8]	P62269 2xAcetyl:2H(3) [K47; K54]	FALSE	0.0315716	0	1	1	2	P62269	P62269 [47-55]	0	1149.67	0	0.181	0.089	0.695	0.0979264	0.0263425	0.948883	0	0	0	203.6	36.9	18	141.5		High	Peak Found	Peak Found	High	High	0.0002176	0.004687	3.5	30.88
FALSE	High	[R].KADGYNQPDSKR.[R]	R	2xAcetyl:2H(3) [K1; K11]	O43390 2xAcetyl:2H(3) [K574; K584]; O60506 2xAcetyl:2H(3) [K566; K576]	FALSE	0.00915147	0	2	2	1	O43390; O60506	O43390 [574-585]; O60506 [566-577]	0	1468.73	0	0.01	0.01	0.01	4.34403e-17	3.7678e-17	4.94188e-17	0			399	1			Shared	High	Peak Found	Not Found	Not Found	High	0	0.0001621	4.51	17.78
FALSE	High	[E].KACANPAAGSVILLENLR.[F]	E	1xCarbamidomethyl [C3]; 1xAcetyl:2H(3) [K1]; 1xAcetyl:2H(3) [N-Term]	P00558 1xCarbamidomethyl [C108]; 1xAcetyl:2H(3) [K106]; 1xAcetyl:2H(3) [N-Term]	FALSE	0.00014175	0	1	1	4	P00558	P00558 [106-123]	0	1987.09	0	24.872	23.016	15.149	2.54214e-07	0.000132371	2.10732e-05	0	0	0	6.2	155.4	143.8	94.6		Peak Found	High	High	Peak Found	High	0	1.355e-07	5.84	66.16
FALSE	High	[E].KAAKELSKR.[S]	E	3xAcetyl:2H(3) [K1; K4; K8]; 1xAcetyl:2H(3) [N-Term]	P13667 3xAcetyl:2H(3) [K218; K221; K225]; 1xAcetyl:2H(3) [N-Term]	FALSE	0.0237619	0	1	1	3	P13667	P13667 [218-226]	0	1210.75	0	100	100	100	4.34403e-17	3.7678e-17	4.94188e-17					237.3	50.3	112.4		Not Found	High	High	Peak Found	High	0	0.001032	3.44	34.76
FALSE	High	[R].HQGVMVGMGQKDSYVGDEAQSKR.[G]	R	2xAcetyl:2H(3) [K11; K22]; 1xAcetyl:2H(3) [N-Term]	P63267 2xAcetyl:2H(3) [K51; K62]; 1xAcetyl:2H(3) [N-Term]; P60709 2xAcetyl:2H(3) [K50; K61]; 1xAcetyl:2H(3) [N-Term]; P62736 2xAcetyl:2H(3) [K52; K63]; 1xAcetyl:2H(3) [N-Term]; P68133 2xAcetyl:2H(3) [K52; K63]; 1xAcetyl:2H(3) [N-Term]; P68032 2xAcetyl:2H(3) [K52; K63]; 1xAcetyl:2H(3) [N-Term]; P63261 2xAcetyl:2H(3) [K50; K61]; 1xAcetyl:2H(3) [N-Term]	FALSE	1.59771e-05	0	2	6	6	P60709; P63261	P63267 [41-63]; P60709 [40-62]; P62736 [42-64]; P68133 [42-64]; P68032 [42-64]; P63261 [40-62]	0	2642.26	0	0.64	0.922	0.392	0.915733	0.959081	0.463731	0	0	0	135.4	86.7	124.8	53.1	Shared	High	Peak Found	High	High	High	0	1.794e-07	6.36	39.91
FALSE	High	[R].STPKEDDSSASTSQSTR.[A]	R	1xAcetyl:2H(3) [K4]	P23588 1xAcetyl:2H(3) [K343]	FALSE	7.50495e-05	0	1	1	4	P23588	P23588 [340-356]	0	1828.82	0	1.074	0.949	1.87	0.866092	0.921739	0.58995	0	0	0	81.7	87.8	77.6	152.9		High	Peak Found	Peak Found	High	High	0	1.08e-06	4.43	16.09
FALSE	High	[TN].KAQKKDGKKR.[K]	T	5xAcetyl:2H(3) [K1; K4; K5; K8; K9]; 1xAcetyl:2H(3) [N-Term]	Q16778 5xAcetyl:2H(3) [K21; K24; K25; K28; K29]; 1xAcetyl:2H(3) [N-Term]; Q6DN03 5xAcetyl:2H(3) [K21; K24; K25; K28; K29]; 1xAcetyl:2H(3) [N-Term]; Q99879 5xAcetyl:2H(3) [K21; K24; K25; K28; K29]; 1xAcetyl:2H(3) [N-Term]; P33778 5xAcetyl:2H(3) [K21; K24; K25; K28; K29]; 1xAcetyl:2H(3) [N-Term]; P58876 5xAcetyl:2H(3) [K21; K24; K25; K28; K29]; 1xAcetyl:2H(3) [N-Term]; Q93079 5xAcetyl:2H(3) [K21; K…	FALSE	0.0211779	0	8	14	69	Q6DN03; P33778; P58876; O60814; Q99880; Q8N257; P23527; Q99877	Q16778 [21-30]; Q6DN03 [21-30]; Q99879 [21-30]; P33778 [21-30]; P58876 [21-30]; Q93079 [21-30]; O60814 [21-30]; Q99880 [21-30]; Q6DRA6 [21-30]; P62807 [21-30]; Q8N257 [21-30]; P06899 [21-30]; P23527 [21-30]; Q99877 [21-30]	0	1456.91	0	0.929	0.83	0.848	0.944711	0.99776	0.985609	0	0	0	110.9	103	92.1	94	Shared	High	High	High	High	High	0.0001346	0.002293	3.23	24.44
FALSE	High	[R].STQAATQVVLNVPETR.[V]	R	1xAcetyl:2H(3) [N-Term]	O75439 1xAcetyl:2H(3) [N-Term]	FALSE	0.00608145	0	1	1	3	O75439	O75439 [44-59]	0	1758.94	0	8.838	7.234	9.775	0.00800375	0.172069	0.0120409	0	0	0	14.9	131.7	107.8	145.6		Peak Found	Peak Found	Peak Found	High	High	0	8.111e-05	3.38	45.98
FALSE	High	[R].HHVLHDQNVDKR.[T]	R	1xAcetyl:2H(3) [K11]	Q02218 1xAcetyl:2H(3) [K697]	FALSE	0.00170673	0	1	1	3	Q02218	Q02218 [687-698]	0	1542.8	0	1.141	1.676	2.555	0.829678	0.719567	0.366403	0	0	0	62.8	71.7	105.2	160.4		Peak Found	High	High	High	High	0	9.295e-06	3.95	15.15
FALSE	High	[G].HGEQQPQPPATQQQQPQQQR.[G]	G	1xAcetyl:2H(3) [N-Term]	Q00839 1xAcetyl:2H(3) [N-Term]	FALSE	5.52804e-05	0	1	1	7	Q00839	Q00839 [158-177]	0	2384.15	0	1.213	0.984	1.538	0.801129	0.915311	0.72657	0	0	0	84.5	102.5	83.1	129.9		Peak Found	Peak Found	Peak Found	High	High	0	2.724e-08	5.41	17.7
FALSE	High	[G].HGEEQPPETAAQR.[C]	G	1xAcetyl:2H(3) [N-Term]	Q96HE7 1xAcetyl:2H(3) [N-Term]	FALSE	0.00840287	0	1	1	2	Q96HE7	Q96HE7 [22-34]	0	1494.7	0	2.104	1.761	4.404	0.481471	0.696746	0.110719	0	0	0	43.2	90.8	76	190		Peak Found	Peak Found	High	Peak Found	High	0.0002176	0.007605	3.81	17.62
FALSE	High	[Y].SVDIPLDKTVVNKDVFRDPALKR.[K]	Y	3xAcetyl:2H(3) [K8; K13; K22]; 1xAcetyl:2H(3) [N-Term]	P61353 3xAcetyl:2H(3) [K93; K98; K107]; 1xAcetyl:2H(3) [N-Term]	FALSE	0.00509466	0	1	1	2	P61353	P61353 [86-108]	1	2805.59	0	0.582	0.832	1.03	0.951808	0.965822	0.91985	0	0	0	116.2	67.6	96.6	119.6		Peak Found	Peak Found	Peak Found	High	High	0.0002176	0.006588	1.72	64.49
FALSE	High	[R].HESGASIKIDEPLEGSEDR.[I]	R	1xAcetyl:2H(3) [K8]	P61978 1xAcetyl:2H(3) [K422]	FALSE	0.00100897	0	1	1	2	P61978	P61978 [415-433]	0	2114.01	0	0.457	0.13	1.493	0.849179	0.415518	0.611912	0	0	0	129.8	59.4	16.9	193.9		Peak Found	Peak Found	Peak Found	High	High	0	4.465e-06	5.16	35.44
FALSE	High	[R].HEDAQKAVDEMNGKELNGKQIYVGR.[A]	R	3xAcetyl:2H(3) [K6; K14; K19]	Q9H361 3xAcetyl:2H(3) [K246; K254; K259]; P11940 3xAcetyl:2H(3) [K246; K254; K259]	FALSE	0.000281153	0	1	2	4	P11940	Q9H361 [241-265]; P11940 [241-265]	0	2964.48	0	0.01	0.01	1.799	4.34403e-17	3.7678e-17	0.650592			0	142.9			257.1		High	Not Found	Not Found	High	High	0	0.0001316	5.46	44.33
FALSE	High	[R].GYWGNKIGKPHTVPCKVTGR.[C]	R	1xCarbamidomethyl [C15]; 3xAcetyl:2H(3) [K6; K9; K16]; 1xAcetyl:2H(3) [N-Term]	P15880 1xCarbamidomethyl [C182]; 3xAcetyl:2H(3) [K173; K176; K183]; 1xAcetyl:2H(3) [N-Term]	FALSE	0.0129489	0	1	1	1	P15880	P15880 [168-187]	0	2435.3	0	1.682	1.715	0.685	0.600876	0.7104	0.966123	0	0	0	78.7	132.4	135	53.9		Peak Found	Peak Found	Peak Found	High	High	0	0.0002933	3.22	47.72
FALSE	High	[R].SVETLKEMIKSGMNVAR.[L]	R	2xAcetyl:2H(3) [K6; K10]; 1xAcetyl:2H(3) [N-Term]	P14618 2xAcetyl:2H(3) [K62; K66]; 1xAcetyl:2H(3) [N-Term]	FALSE	0.000106996	0	1	1	31	P14618	P14618 [57-73]	0	2028.08	0	0.402	0.385	0.888	0.382045	0.291314	0.963814	0	0	0	149.5	60.2	57.6	132.8		High	High	High	High	High	0	9.081e-08	5.09	83.56
FALSE	High	[R].SVETLKEMIKSGMNVAR.[L]	R	1xOxidation [M]; 2xAcetyl:2H(3) [K6; K10]; 1xAcetyl:2H(3) [N-Term]	P14618 1xOxidation [M]; 2xAcetyl:2H(3) [K62; K66]; 1xAcetyl:2H(3) [N-Term]	FALSE	3.66987e-05	0	1	1	8	P14618	P14618 [57-73]	0	2044.08	0	3.925	0.01	2.268	0.0603208	3.7678e-17	0.337468	0		0	55.6	218.3		126.1		Peak Found	High	Not Found	High	High	0	1.36e-08	5.46	72.03
FALSE	High	[M].SVGFIGAGQLAYALAR.[G]	M	1xAcetyl [N-Term]	Q96C36 1xAcetyl [N-Term]	FALSE	0.00016822	0	1	1	2	Q96C36	Q96C36 [2-17]	0	1635.89	0		100	100		3.7678e-17	4.94188e-17						374.3	25.7		Not Found	Not Found	High	Peak Found	High	0	2.145e-07	4.53	72.07
FALSE	High	[RH].GVVDSEDLPLNISR.[E]	R	1xAcetyl:2H(3) [N-Term]	P07900 1xAcetyl:2H(3) [N-Term]; P08238 1xAcetyl:2H(3) [N-Term]; Q12931 1xAcetyl:2H(3) [N-Term]; Q58FF7 1xAcetyl:2H(3) [N-Term]	FALSE	0.0140997	0	3	4	14	P07900; P08238; Q12931	P07900 [387-400]; P08238 [379-392]; Q12931 [389-402]; Q58FF7 [321-334]	0	1558.82	0	0.736	0.14	0.634	0.994056	0.175963	0.925765	0	0	0	159.3	117.2	22.4	101.1	Shared	High	High	High	Peak Found	High	0.001654	0.02326	2.8	53.8
FALSE	High	[L].HLKEDQTEYLEER.[RW]	L	1xAcetyl:2H(3) [K3]; 1xAcetyl:2H(3) [N-Term]	P07900 1xAcetyl:2H(3) [K191]; 1xAcetyl:2H(3) [N-Term]; P08238 1xAcetyl:2H(3) [K186]; 1xAcetyl:2H(3) [N-Term]; Q58FF6 1xAcetyl:2H(3) [K161]; 1xAcetyl:2H(3) [N-Term]; Q58FF7 1xAcetyl:2H(3) [K165]; 1xAcetyl:2H(3) [N-Term]	FALSE	0.000472772	0	2	4	3	P07900; P08238	P07900 [189-201]; P08238 [184-196]; Q58FF6 [159-171]; Q58FF7 [163-175]	0	1779.87	0	0.716	0.161	0.854	0.997479	0.484336	0.987852	0	0	0	146.5	104.9	23.6	125.1	Shared	Peak Found	High	Peak Found	High	High	0	2.045e-05	5.62	36.73
FALSE	High	[Q].EVISWLDANTLAEKDEFEHKR.[K]	Q	1xGlu->pyro-Glu [N-Term]; 2xAcetyl:2H(3) [K14; K20]	P0DMV9 1xGlu->pyro-Glu [N-Term]; 2xAcetyl:2H(3) [K589; K595]	FALSE	0.00887678	0	1	1	1	P0DMV9	P0DMV9 [576-596]	0	2602.31	0	0.015	0.01	0.336	2.84549e-05	3.7678e-17	0.583198	0		0	296	4.5		99.5		High	Peak Found	Not Found	Peak Found	High	0	0.0001545	4.74	70.16
FALSE	High	[R].IPKVQKLLQDFFNGR.[D]	R	2xAcetyl:2H(3) [K3; K6]	P0DMV9 2xAcetyl:2H(3) [K345; K348]	FALSE	0.000775746	0	1	1	21	P0DMV9	P0DMV9 [343-357]	0	1893.09	0	0.879	1.055	1.489	0.935955	0.915311	0.77575	0	0	0	90.4	79.4	95.4	134.7		High	High	High	High	High	0	5.104e-06	4.68	80.83
FALSE	High	[R].SILTQIDHILMDKER.[L]	R	1xAcetyl:2H(3) [K13]; 1xAcetyl:2H(3) [N-Term]	Q9NY61 1xAcetyl:2H(3) [K403]; 1xAcetyl:2H(3) [N-Term]	FALSE	0.00485176	0	1	1	1	Q9NY61	Q9NY61 [391-405]	0	1902.03	0														No Quan Values	High	Not Found	Not Found	Not Found	High	0	5.499e-05	4.2
FALSE	High	[R].NQILQNEKKKMQAHIQDLEEQLDEEEGAR.[Q]	R	3xAcetyl:2H(3) [K8; K9; K10]	P35580 3xAcetyl:2H(3) [K945; K946; K947]	FALSE	0.000177737	0	1	1	1	P35580	P35580 [938-966]	0	3599.8	0														No Quan Values	High	Not Found	Not Found	Not Found	High	0	1.978e-07	6.63
FALSE	High	[R].NQEQMKPLEEKQEEER.[S]	R	2xAcetyl:2H(3) [K6; K11]	P62191 2xAcetyl:2H(3) [K86; K91]	FALSE	0.000193622	0	1	1	6	P62191	P62191 [81-96]	0	2135.02	0	0.397	0.607	0.358	0.793056	0.969602	0.661829	0	0	0	169.3	67.2	102.8	60.7		High	Peak Found	High	High	High	0	3.133e-06	5.63	31.45
FALSE	High	[R].SGGYSSGKQGR.[S]	R	1xAcetyl:2H(3) [K8]; 1xAcetyl:2H(3) [N-Term]	Q15084 1xAcetyl:2H(3) [K150]; 1xAcetyl:2H(3) [N-Term]	FALSE	0.0147127	0	1	1	31	Q15084	Q15084 [143-153]	0	1173.58	0	0.341	0.469	0.175	0.228915	0.500733	0.00351854	0	0	0	201.4	68.8	94.5	35.3		High	High	High	High	High	0	0.000367	3.36	16.94
FALSE	High	[R].NPPGFAFVEFEDPR.[D]	R			FALSE	0.0154457	0	1	2	1	P84103	Q16629 [45-58]; P84103 [44-57]	0	1621.76	0	0.496	0.518	0.534	0.82476	0.852348	0.823087	0	0	0	157	77.9	81.3	83.8		Peak Found	High	Peak Found	Peak Found	High	0	0.0003963	3.36	54.35
FALSE	High	[R].NPKTDKLVNER.[L]	R	2xAcetyl:2H(3) [K3; K6]	P05023 2xAcetyl:2H(3) [K840; K843]	FALSE	0.0165132	0	1	1	5	P05023	P05023 [838-848]	0	1403.78	0	0.291	0.305	0.794	0.589081	0.792695	0.993902	0	0	0	167.3	48.6	51.1	133		Peak Found	Peak Found	Peak Found	High	High	6.911e-05	0.00137	3.8	29.12
FALSE	High	[R].NPKGNKKNAGFTPQER.[Q]	R	3xAcetyl:2H(3) [K3; K6; K7]	P27695 3xAcetyl:2H(3) [K224; K227; K228]	FALSE	9.18291e-05	0	1	1	17	P27695	P27695 [222-237]	0	1921.02	0	1.437	1.283	1.403	0.71388	0.868744	0.768141	0	0	0	78.1	112.2	100.2	109.6		High	High	High	Peak Found	High	0	6.456e-08	4.93	26.8
FALSE	High	[R].NPKGEVVEGDPDKVLR.[M]	R	2xAcetyl:2H(3) [K3; K13]	O43615 2xAcetyl:2H(3) [K405; K415]	FALSE	0.00033983	0	1	1	5	O43615	O43615 [403-418]	0	1841.99	0	0.01	0.01	0.01	4.34403e-17	3.7678e-17	4.94188e-17				400					High	Not Found	Not Found	Not Found	High	0	6.001e-07	4.95	37.25
FALSE	High	[R].NNNTDLMILKNTKDAVR.[N]	R	2xAcetyl:2H(3) [K10; K13]	Q99460 2xAcetyl:2H(3) [K354; K357]	FALSE	0.0124847	0	1	1	5	Q99460	Q99460 [345-361]	0	2050.09	0	0.427	0.042	1.435	0.82476	0.0788573	0.731564	0	0	0	137.8	58.8	5.7	197.7		Peak Found	Peak Found	High	High	High	0	0.0002768	4.95	53.23
FALSE	High	[R].NNLAGAEELFAR.[K]	R			FALSE	0.029722	0	1	1	6	Q00610	Q00610 [355-366]	0	1304.66	0	0.755	0.262	1.938	0.985294	0.312072	0.155205	0	0	0	101.1	76.4	26.5	196		Peak Found	Peak Found	High	High	High	0	0.001223	3.81	45.87
FALSE	High	[R].NNGVVDKSLFSNVVTKNKDLPESALR.[D]	R	3xAcetyl:2H(3) [K7; K16; K18]	P31939 3xAcetyl:2H(3) [K397; K406; K408]	FALSE	0.00840287	0	1	1	2	P31939	P31939 [391-416]	0	2979.61	0	0.259	0.01	1.102	0.484258	3.7678e-17	0.891765	0		0	169.4	43.9		186.7		Peak Found	Peak Found	Not Found	High	High	0	0.0001413	4.05	62.14
FALSE	High	[R].SGKAPILIATDVASR.[G]	R	1xAcetyl:2H(3) [K3]; 1xAcetyl:2H(3) [N-Term]	Q92841 1xAcetyl:2H(3) [K468]; 1xAcetyl:2H(3) [N-Term]	FALSE	0.00127279	0	1	1	37	Q92841	Q92841 [466-480]	0	1588.92	0	0.682	0.154	0.749	0.967854	0.199628	0.987815	0	0	0	154.7	105.5	23.9	115.9		High	High	Peak Found	High	High	0	5.664e-06	5.39	57.22
FALSE	High	[E].NMQVNKIKKNEDAKKR.[L]	E	5xAcetyl:2H(3) [K6; K8; K9; K14; K15]; 1xAcetyl:2H(3) [N-Term]	P11388 5xAcetyl:2H(3) [K17; K19; K20; K25; K26]; 1xAcetyl:2H(3) [N-Term]	FALSE	0.001686	0	1	1	6	P11388	P11388 [12-27]	0	2214.26	0	100	100	100	4.34403e-17	3.7678e-17	4.94188e-17					165.6	87.5	146.8		Not Found	High	Peak Found	High	High	0	3.201e-05	4.47	42.8
FALSE	High	[R].SGKPAELLKMFGIDR.[D]	R	2xAcetyl:2H(3) [K3; K9]; 1xAcetyl:2H(3) [N-Term]	P29401 2xAcetyl:2H(3) [K597; K603]; 1xAcetyl:2H(3) [N-Term]	FALSE	0.000515022	0	1	1	54	P29401	P29401 [595-609]	0	1796.99	0	0.454	0.525	0.786	0.520007	0.632324	0.992324	0	0	0	144.6	65.7	75.9	113.8		High	High	High	High	High	0	2.867e-06	4.5	81.54
FALSE	High	[R].NLQEVLGEEKLKEILKER.[E]	R	3xAcetyl:2H(3) [K10; K12; K16]	P54577 3xAcetyl:2H(3) [K26; K28; K32]	FALSE	0.000393542	0	1	1	2	P54577	P54577 [17-34]	0	2303.32	0	0.075	0.01	2.351	0.0211269	3.7678e-17	0.101115	0		0	116.8	8.8		274.4		Peak Found	Peak Found	Not Found	High	High	0	1.278e-06	5.26	68.72
FALSE	High	[R].SGKPAELLKMFGIDRDAIAQAVR.[G]	R	2xAcetyl:2H(3) [K3; K9]; 1xAcetyl:2H(3) [N-Term]	P29401 2xAcetyl:2H(3) [K597; K603]; 1xAcetyl:2H(3) [N-Term]	FALSE	0.0140997	0	1	1	9	P29401	P29401 [595-617]	1	2621.44	0	0.287	0.395	0.49	0.11887	0.314224	0.576324	0	0	0	184.2	52.9	72.7	90.2		High	High	High	High	High	0.003543	0.04056	3.59	80.4
FALSE	High	[R].NLLSVAYKNVVGGR.[R]	R	1xAcetyl:2H(3) [K8]	P27348 1xAcetyl:2H(3) [K49]	FALSE	0.0155399	0	1	1	4	P27348	P27348 [42-55]	0	1534.88	0	100	100		4.34403e-17	3.7678e-17						172.5	227.5			Not Found	Peak Found	High	Not Found	High	0	0.0004032	3.84	56.52
FALSE	High	[R].NLLSVAYKNVVGAR.[R]	R	1xAcetyl:2H(3) [K8]	P63104 1xAcetyl:2H(3) [K49]; P31946 1xAcetyl:2H(3) [K51]; Q04917 1xAcetyl:2H(3) [K50]; P61981 1xAcetyl:2H(3) [K50]	FALSE	0.00611868	0	4	4	2	P63104; P31946; Q04917; P61981	P63104 [42-55]; P31946 [44-57]; Q04917 [43-56]; P61981 [43-56]	0	1548.89	0	1.551	2.861	2.155	0.463915	0.0521937	0.0958935	0	0	0	52.9	82	151.2	113.9	Shared	Peak Found	High	Peak Found	High	High	0	8.164e-05	3.88	57.25
FALSE	High	[R].NLLSVAYKNVIGAR.[R]	R	1xAcetyl:2H(3) [K8]	P62258 1xAcetyl:2H(3) [K50]	FALSE	0.00184786	0	1	1	1	P62258	P62258 [43-56]	0	1562.91	0	0.658	0.746	1.186	0.960927	0.980181	0.796244	0	0	0	111.4	73.3	83.1	132.2		High	Peak Found	Peak Found	Peak Found	High	0	1.063e-05	3.81	59.81
FALSE	High	[R].NILKQGIETPEDQNDLR.[K]	R	1xAcetyl:2H(3) [K4]	Q15637 1xAcetyl:2H(3) [K227]	FALSE	8.37814e-05	0	1	1	1	Q15637	Q15637 [224-240]	0	2028.04	0	0.221	0.071	0.668	0.388431	0.176419	0.963108	0	0	0	204.1	45.1	14.6	136.3		High	Peak Found	Peak Found	Peak Found	High	0	5.538e-08	4.43	42.51
FALSE	High	[R].SGKSPILVATAVAAR.[G]	R	1xAcetyl:2H(3) [K3]; 1xAcetyl:2H(3) [N-Term]	O00571 1xAcetyl:2H(3) [K491]; 1xAcetyl:2H(3) [N-Term]; O15523 1xAcetyl:2H(3) [K489]; 1xAcetyl:2H(3) [N-Term]	FALSE	0.0031831	0	1	2	5	O00571	O00571 [489-503]; O15523 [487-501]	0	1530.91	0	0.177	0.044	0.195	0.0288568	1.91917e-05	0.0201674	0	0	0	282.6	50	12.4	55		High	Peak Found	High	Peak Found	High	0	5.985e-05	4.19	56.07
FALSE	High	[R].SGKYDLDFKSPDDPSR.[Y]	R	2xAcetyl:2H(3) [K3; K9]	P06733 2xAcetyl:2H(3) [K256; K262]	FALSE	0.000720874	0	1	1	6	P06733	P06733 [254-269]	0	1916.91	0	0.625	0.732	0.968	0.862926	0.946606	0.918656	0	0	0	120.3	75.1	88.1	116.5		High	High	High	High	High	0	7.924e-06	5.46	41.79
FALSE	High	[R].SGKYDLDFKSPDDPSR.[Y]	R	2xAcetyl:2H(3) [K3; K9]; 1xAcetyl:2H(3) [N-Term]	P06733 2xAcetyl:2H(3) [K256; K262]; 1xAcetyl:2H(3) [N-Term]	FALSE	0.00230256	0	1	1	32	P06733	P06733 [254-269]	0	1961.94	0	0.98	0.668	1.114	0.920178	0.881465	0.797254	0	0	0	106.3	104.2	71	118.4		High	High	High	High	High	0	5.353e-05	5.04	48.59
FALSE	High	[R].NIEELQQQNQR.[L]	R			FALSE	0.0313817	0	1	1	5	P12270	P12270 [542-552]	0	1399.69	0	0.222	0.246	0.956	0.434648	0.747865	0.965626	0	0	0	165	36.6	40.6	157.8		Peak Found	Peak Found	High	High	High	6.911e-05	0.001734	4.41	21.56
FALSE	High	[R].NQVEDLLATLEKSGAGVPAVILR.[R]	R	1xAcetyl:2H(3) [K12]	Q92542 1xAcetyl:2H(3) [K403]	FALSE	0.00161539	0	1	1	4	Q92542	Q92542 [392-414]	0	2438.37	0	0.024	0.01	2.759	0.000671904	3.7678e-17	0.292002	0		0	105.7	2.6		291.7		Peak Found	Peak Found	Not Found	High	High	0.0002176	0.00502	4.23	81.85
FALSE	High	[R].NLEALALDLMEPEQAVDLTLPKVEAMNKR.[L]	R	2xAcetyl:2H(3) [K22; K28]	P12956 2xAcetyl:2H(3) [K510; K516]	FALSE	0.000140027	0	1	1	15	P12956	P12956 [489-517]	0	3341.76	0	0.201	0.089	0.764	0.241515	0.0891157	0.993401	0	0	0	194.7	39.1	17.4	148.8		High	High	Peak Found	High	High	0	1.026e-05	5.46	84.95
FALSE	High	[R].NSEPAGLETPEAKVLFDKVASQGEVVR.[K]	R	2xAcetyl:2H(3) [K13; K18]	P07814 2xAcetyl:2H(3) [K902; K907]	FALSE	0.0116054	0	1	1	1	P07814	P07814 [890-916]	0	2960.55	0	0.01	0.01	0.961	4.34403e-17	3.7678e-17	0.970648			0	204			196		Peak Found	Not Found	Not Found	High	High	0	0.0002437	3.19	67.96
FALSE	High	[E].NSLVAYKAASDIAMTELPPTHPIR.[L]	E	1xAcetyl:2H(3) [K7]; 1xAcetyl:2H(3) [N-Term]	P62258 1xAcetyl:2H(3) [K153]; 1xAcetyl:2H(3) [N-Term]	FALSE	0.00124205	0	1	1	4	P62258	P62258 [147-170]	0	2685.42	0	20.84	49.893	41.966	0.000255928	0.00345295	5.64615e-06	0	0	0	3.5	73.3	175.5	147.6		Peak Found	Peak Found	High	High	High	0	5.426e-06	4.57	66.36
FALSE	High	[M].PATEKDLAEDAPWKKIQQNTFTR.[W]	M	3xAcetyl:2H(3) [K5; K14; K15]; 1xAcetyl:2H(3) [N-Term]	P21333 3xAcetyl:2H(3) [K33; K42; K43]; 1xAcetyl:2H(3) [N-Term]	FALSE	0.000139174	0	1	1	5	P21333	P21333 [29-51]	0	2867.5	0	1.736	1.727	1.852	0.501599	0.66396	0.381703	0	0	0	63.3	110	109.4	117.3		High	Peak Found	High	High	High	0	1.307e-07	5.16	66.28
FALSE	High	[D].PAPLQHQMDIYQKR.[C]	D	1xAcetyl:2H(3) [K13]	P29401 1xAcetyl:2H(3) [K204]	FALSE	0.00175969	0	1	1	8	P29401	P29401 [192-205]	0	1769.92	0	1.004	0.234	2.044	0.893993	0.733437	0.482625	0	0	0	93.4	93.8	21.9	190.9		Peak Found	High	Peak Found	High	High	0	9.769e-06	3.97	33.3
FALSE	High	[D].PAMLPTMIGLLAEAGVR.[L]	D			FALSE	0.00100897	0	1	1	9	O43175	O43175 [475-491]	0	1739.95	0	0.513	0.701	1.186	0.920178	0.99998	0.90318	0	0	0	117.7	60.4	82.4	139.5		High	Peak Found	High	High	High	0	7.709e-06	5.3	78.33
FALSE	High	[M].PAIMTMLADHAAR.[Q]	M	1xAcetyl:2H(3) [N-Term]	O14980 1xAcetyl:2H(3) [N-Term]	FALSE	0.00151036	0	1	1	7	O14980	O14980 [2-14]	0	1442.73	0	0.467	0.045	0.803	0.835739	0.0452917	0.994778	0	0	0	172.8	80.6	7.8	138.8		High	Peak Found	High	High	High	0	3.223e-05	5.07	72.17
FALSE	High	[D].PAKSAPAPKKGSKKAVTKVQKKDGKKR.[K]	D	10xAcetyl:2H(3) [K3; K9; K10; K13; K14; K18; K21; K22; K25; K26]; 1xAcetyl:2H(3) [N-Term]	Q5QNW6 10xAcetyl:2H(3) [K6; K12; K13; K16; K17; K21; K24; K25; K28; K29]; 1xAcetyl:2H(3) [N-Term]	FALSE	2.37743e-05	0	1	1	16	Q5QNW6	Q5QNW6 [4-30]	0	3357.08	0	0.548	0.65	1.033	0.796443	0.868744	0.871303	0	0	0	123.8	67.9	80.5	127.9		High	High	High	High	High	0	7.997e-09	5.62	46.96
FALSE	High	[D].PAKSAPAPKKGSKKAVTKVQKKDGKKR.[K]	D	10xAcetyl:2H(3) [K3; K9; K10; K13; K14; K18; K21; K22; K25; K26]	Q5QNW6 10xAcetyl:2H(3) [K6; K12; K13; K16; K17; K21; K24; K25; K28; K29]	FALSE	6.54321e-06	0	1	1	21	Q5QNW6	Q5QNW6 [4-30]	0	3312.05	0	0.767	0.843	1.082	0.976309	0.99998	0.829117	0	0	0	108.3	83.1	91.3	117.3		High	High	High	High	High	0	7.215e-10	5.89	40.69
FALSE	High	[ED].PAKSAPAPKKGSKKAVTKAQKKDGKKR.[K]	E	10xAcetyl:2H(3) [K3; K9; K10; K13; K14; K18; K21; K22; K25; K26]; 1xAcetyl:2H(3) [N-Term]	Q16778 10xAcetyl:2H(3) [K6; K12; K13; K16; K17; K21; K24; K25; K28; K29]; 1xAcetyl:2H(3) [N-Term]; Q93079 10xAcetyl:2H(3) [K6; K12; K13; K16; K17; K21; K24; K25; K28; K29]; 1xAcetyl:2H(3) [N-Term]; O60814 10xAcetyl:2H(3) [K6; K12; K13; K16; K17; K21; K24; K25; K28; K29]; 1xAcetyl:2H(3) [N-Term]; P62807 10xAcetyl:2H(3) [K6; K12; K13; K16; K17; K21; K24; K25; K28; K29]; 1xAcetyl:2H(3) [N-Term]; P06…	FALSE	0.00137805	0	2	6	1	O60814; P23527	Q16778 [4-30]; Q93079 [4-30]; O60814 [4-30]; P62807 [4-30]; P06899 [4-30]; P23527 [4-30]	0	3329.04	0	0.298	0.506	0.663	0.725084	0.965822	0.961625	0	0	0	162.1	48.3	82	107.5	Shared	High	Peak Found	Peak Found	Peak Found	High	0	6.44e-06	3.81	43.66
FALSE	High	[ED].PAKSAPAPKKGSKKAVTKAQKKDGKKR.[K]	E	10xAcetyl:2H(3) [K3; K9; K10; K13; K14; K18; K21; K22; K25; K26]	Q16778 10xAcetyl:2H(3) [K6; K12; K13; K16; K17; K21; K24; K25; K28; K29]; Q93079 10xAcetyl:2H(3) [K6; K12; K13; K16; K17; K21; K24; K25; K28; K29]; O60814 10xAcetyl:2H(3) [K6; K12; K13; K16; K17; K21; K24; K25; K28; K29]; P62807 10xAcetyl:2H(3) [K6; K12; K13; K16; K17; K21; K24; K25; K28; K29]; P06899 10xAcetyl:2H(3) [K6; K12; K13; K16; K17; K21; K24; K25; K28; K29]; P23527 10xAcetyl:2H(3) [K6; K…	FALSE	3.55008e-06	0	2	6	23	O60814; P23527	Q16778 [4-30]; Q93079 [4-30]; O60814 [4-30]; P62807 [4-30]; P06899 [4-30]; P23527 [4-30]	0	3284.01	0	1.336	1.434	1.337	0.634467	0.553961	0.56027	0	0	0	78.3	104.7	112.3	104.7	Shared	High	High	High	High	High	0	1.607e-09	6.44	37.77
FALSE	High	[A].PAKKGGEKKKGR.[S]	A	5xAcetyl:2H(3) [K3; K4; K8; K9; K10]; 1xAcetyl:2H(3) [N-Term]	P62899 5xAcetyl:2H(3) [K5; K6; K10; K11; K12]; 1xAcetyl:2H(3) [N-Term]	FALSE	0.00172772	0	1	1	23	P62899	P62899 [3-14]	0	1553.97	0	0.681	0.646	0.764	0.921257	0.863222	0.985609	0	0	0	129.4	88.1	83.6	98.8		High	High	High	High	High	0	9.551e-06	4.39	27.78
FALSE	High	[D].PAEKDEKGMPVTAR.[V]	D	2xAcetyl:2H(3) [K4; K7]	P30041 2xAcetyl:2H(3) [K122; K125]	FALSE	0.000521358	0	1	1	1	P30041	P30041 [119-132]	0	1618.84	0	0.373	0.306	1.157	0.774457	0.815688	0.909807	0	0	0	141.1	52.6	43.2	163.2		High	Peak Found	Peak Found	Peak Found	High	0	1.237e-06	5.02	26.75
FALSE	High	[A].PAAPAPAEKTPVKKKAR.[K]	A	4xAcetyl:2H(3) [K9; K13; K14; K15]	P10412 4xAcetyl:2H(3) [K17; K21; K22; K23]	FALSE	0.0079058	0	1	1	11	P10412	P10412 [9-25]	0	1940.17	0	0.921	1.015	0.95	0.95226	0.914777	0.925765	0	0	0	103	94.8	104.5	97.8		High	High	High	High	High	0	0.0001418	3.3	35.74
FALSE	High	[A].PAAPAAPAPAEKTPVKKKAR.[K]	A	4xAcetyl:2H(3) [K12; K16; K17; K18]	P10412 4xAcetyl:2H(3) [K17; K21; K22; K23]	FALSE	0.000653699	0	1	1	19	P10412	P10412 [6-25]	0	2179.3	0	0.76	0.865	0.757	0.971942	0.988299	0.985609	0	0	0	118.3	89.9	102.3	89.5		High	High	High	High	High	0	3.968e-06	3.42	35.76
FALSE	High	[A].PAAPAAAPPAEKAPVKKKAAKKAGGTPR.[K]	A	6xAcetyl:2H(3) [K12; K16; K17; K18; K21; K22]	P16403 6xAcetyl:2H(3) [K17; K21; K22; K23; K26; K27]	FALSE	0.0129489	0	1	1	9	P16403	P16403 [6-33]	0	2949.75	0	0.73	0.839	0.611	0.958208	0.99998	0.848385	0	0	0	125.8	91.8	105.6	76.8		High	High	High	High	High	6.911e-05	0.001584	3.64	43.95
FALSE	High	[A].PAAAPPAEKAPVKKKAAKKAGGTPR.[K]	A	6xAcetyl:2H(3) [K9; K13; K14; K15; K18; K19]	P16403 6xAcetyl:2H(3) [K17; K21; K22; K23; K26; K27]	FALSE	0.00165537	0	1	1	3	P16403	P16403 [9-33]	0	2710.63	0	0.966	0.941	0.66	0.91679	0.956392	0.963108	0	0	0	112.1	108.3	105.5	74		Peak Found	High	High	Peak Found	High	0	9.59e-06	3.66	43.98
FALSE	High	[E].SGEKNEGSESAPEGQAQQR.[R]	E	1xAcetyl:2H(3) [K4]; 1xAcetyl:2H(3) [N-Term]	P67809 1xAcetyl:2H(3) [K170]; 1xAcetyl:2H(3) [N-Term]	FALSE	0.00266624	0	1	1	1	P67809	P67809 [167-185]	0	2078.95	0	100	100	100	4.34403e-17	3.7678e-17	4.94188e-17					171	70.4	158.6		Not Found	Peak Found	High	Peak Found	High	0	1.984e-05	3.11	19.38
FALSE	High	[R].NVMEEGKDFQPSR.[S]	R	1xAcetyl:2H(3) [K7]	P35606 1xAcetyl:2H(3) [K840]	FALSE	0.00497173	0	1	1	1	P35606	P35606 [834-846]	0	1581.74	0	0.01	0.01	0.115	4.34403e-17	3.7678e-17	0.0615428			0	358.7			41.3		High	Not Found	Not Found	Peak Found	High	0	5.77e-05	3.89	33.07
FALSE	High	[R].SGEMIKKIQNDAGVR.[I]	R	2xAcetyl:2H(3) [K6; K7]; 1xAcetyl:2H(3) [N-Term]	Q92945 2xAcetyl:2H(3) [K346; K347]; 1xAcetyl:2H(3) [N-Term]	FALSE	0.000738719	0	1	1	3	Q92945	Q92945 [341-355]	0	1780.96	0	0.871	0.051	0.969	0.974516	5.75713e-05	0.918656	0	0	0	138.3	120.5	7.1	134		High	Peak Found	High	High	High	0	4.223e-05	5.24	58.43
FALSE	High	[R].NTTIPTKQTQTFTTYSDNQPGVLIQVYEGER.[A]	R	1xAcetyl:2H(3) [K7]	P11142 1xAcetyl:2H(3) [K423]	FALSE	0.00876922	0	1	1	18	P11142	P11142 [417-447]	0	3574.77	0	0.01	0.01	0.504	4.34403e-17	3.7678e-17	0.886663			0	266			134		High	Not Found	Not Found	High	High	0	0.0002742	2.94	56.96
FALSE	High	[R].NTTIPTKKSQVFSTAADGQTQVE.[I]	R	2xAcetyl:2H(3) [K7; K8]	P38646 2xAcetyl:2H(3) [K467; K468]	FALSE	0.0205455	0	1	1	10	P38646	P38646 [461-483]	0	2541.29	0	100	100	100	4.34403e-17	3.7678e-17	4.94188e-17					133.4	58.1	208.5		Not Found	High	Peak Found	High	High	0.0002176	0.004405	2.92	48.08
FALSE	High	[R].NTKGGDAPAAGEDA.[-]	R	1xAcetyl:2H(3) [K3]	P62851 1xAcetyl:2H(3) [K114]	FALSE	0.00271557	0	1	1	12	P62851	P62851 [112-125]	0	1318.59	0	0.728	1.083	0.804	0.994056	0.930894	0.991092	0	0	0	110.7	80.6	119.8	88.9		High	Peak Found	Peak Found	Peak Found	High	0.0002176	0.004657	3.87	18.55
FALSE	High	[R].NTGIICTIGPASR.[S]	R	1xCarbamidomethyl [C6]	P14618 1xCarbamidomethyl [C49]	FALSE	0.00695526	0	1	1	1	P14618	P14618 [44-56]	0	1359.7	0	0.75	0.432	2.148	0.990651	0.878498	0.239344	0	0	0	92.4	69.3	39.9	198.5		Peak Found	Peak Found	High	Peak Found	High	0	0.0001014	3.94	34.51
FALSE	High	[R].NTAELQPESGKR.[K]	R	1xAcetyl:2H(3) [K11]	O15355 1xAcetyl:2H(3) [K519]	FALSE	0.0165132	0	1	1	1	O15355	O15355 [509-520]	0	1374.71	0	0.114	0.167	0.561	0.0437823	0.203903	0.859083	0	0	0	217.2	24.8	36.2	121.7		Peak Found	Peak Found	Peak Found	High	High	0	0.0004474	3.62	20.04
FALSE	High	[R].NSTIPTKQTQIFTTYSDNQPGVLIQVYEGER.[A]	R	1xAcetyl:2H(3) [K7]	P0DMV9 1xAcetyl:2H(3) [K423]; P34931 1xAcetyl:2H(3) [K425]	FALSE	0.000493445	0	1	2	8	P0DMV9	P0DMV9 [417-447]; P34931 [419-449]	0	3572.79	0	0.704	0.542	1.574	0.996243	0.959081	0.739911	0	0	0	104.7	73.7	56.7	164.8		Peak Found	Peak Found	Peak Found	High	High	0	1.123e-06	4.67	60.72
FALSE	High	[R].SGERPVTAGEEDEQVPDSIDAR.[E]	R	1xAcetyl:2H(3) [N-Term]	Q9Y3D0 1xAcetyl:2H(3) [N-Term]	FALSE	0.00208809	0	1	1	3	Q9Y3D0	Q9Y3D0 [23-44]	0	2402.11	0	0.01	0.01	0.509	4.34403e-17	3.7678e-17	0.865833			0	265			135		High	Not Found	Not Found	Peak Found	High	0	3.1e-05	3.81	34.15
FALSE	High	[R].NLATTVTEEILEKSFSEFGKLER.[V]	R	2xAcetyl:2H(3) [K13; K20]	O43390 2xAcetyl:2H(3) [K359; K366]	FALSE	0.000972636	0	1	1	2	O43390	O43390 [347-369]	0	2731.43	0	5.42	3.899	2.186	0.0483831	0.398905	0.405843	0	0	0	32	173.4	124.7	69.9		Peak Found	High	Peak Found	High	High	0	3.562e-06	5.01	92.67
FALSE	High	[R].NLANTVTEEILEKAFSQFGKLER.[V]	R	2xAcetyl:2H(3) [K13; K20]	O60506 2xAcetyl:2H(3) [K356; K363]	FALSE	0.000996712	0	1	1	1	O60506	O60506 [344-366]	0	2727.45	0	1.411	0.859	1.973	0.72158	0.944796	0.568248	0	0	0	76.3	107.7	65.5	150.5		Peak Found	Peak Found	Peak Found	High	High	0	3.728e-06	5.3	91.23
FALSE	High	[R].NKQTYSTEPNNLKAR.[N]	R	2xAcetyl:2H(3) [K2; K13]	P46779 2xAcetyl:2H(3) [K22; K33]	FALSE	0.00678757	0	1	1	2	P46779	P46779 [21-35]	0	1853.96	0	0.953	0.87	1.034	0.920178	0.959081	0.92321	0	0	0	103.7	98.8	90.3	107.2		Peak Found	Peak Found	High	High	High	0	9.778e-05	4.39	26.52
FALSE	High	[R].NDFQLIGIQDGYLSLLQDSGEVRE.[D]	R			FALSE	0.000239827	0	1	1	3	P63241	P63241 [87-110]	1	2709.34	0		100	100		3.7678e-17	4.94188e-17						107.6	292.4		Not Found	Not Found	High	Peak Found	High	0	3.303e-07	5.68	71.42
FALSE	High	[R].NDFQLIGIQDGYLSLLQDSGEVR.[E]	R	1xAcetyl:2H(3) [N-Term]	P63241 1xAcetyl:2H(3) [N-Term]	FALSE	0.0311929	0	1	1	25	P63241	P63241 [87-109]	0	2625.32	0	0.3	0.655	0.59	0.557951	0.963439	0.92321	0	0	0	157.2	47.1	103	92.7		High	High	High	High	High	0.0003196	0.008577	3	76.95
FALSE	High	[R].NDFQLIGIQDGYLSLLQDSGEVR.[E]	R			FALSE	8.82901e-06	0	1	1	13	P63241	P63241 [87-109]	0	2580.29	0	0.18	0.571	0.423	0.218846	0.935887	0.72318	0	0	0	184	33.1	105	77.9		High	High	High	High	High	0	6.691e-08	6.16	70.41
FALSE	High	[R].NDEYENLFNMIVEIPR.[W]	R	1xAcetyl:2H(3) [N-Term]	Q9H2U2 1xAcetyl:2H(3) [N-Term]	FALSE	0.00840287	0	1	1	4	Q9H2U2	Q9H2U2 [85-100]	0	2040.98	0	0.231	0.313	0.365	0.453239	0.81264	0.619986	0	0	0	209.6	48.3	65.6	76.5		High	Peak Found	Peak Found	Peak Found	High	0	0.000141	4.83	80.81
FALSE	High	[R].NDEELNKLLGR.[V]	R	1xAcetyl:2H(3) [K7]	Q7L7L0 1xAcetyl:2H(3) [K96]; P04908 1xAcetyl:2H(3) [K96]; Q93077 1xAcetyl:2H(3) [K96]	FALSE	0.0236184	0	1	3	22	P04908	Q7L7L0 [90-100]; P04908 [90-100]; Q93077 [90-100]	0	1345.71	2	0.856	0.913	0.879	0.980453	0.963439	0.966123	0	0	0	109.6	93.9	100.1	96.4		High	High	High	High	High	0	0.0008265	4.47	45.05
FALSE	High	[R].NDEELNKLLGKVTIAQGGVLPNIQAVLLPKKTE.[S]	R	4xAcetyl:2H(3) [K7; K11; K30; K31]	Q16777 4xAcetyl:2H(3) [K96; K100; K119; K120]; Q99878 4xAcetyl:2H(3) [K96; K100; K119; K120]; Q96KK5 4xAcetyl:2H(3) [K96; K100; K119; K120]; Q9BTM1 4xAcetyl:2H(3) [K96; K100; K119; K120]; P20671 4xAcetyl:2H(3) [K96; K100; K119; K120]; P0C0S8 4xAcetyl:2H(3) [K96; K100; K119; K120]; Q6FI13 4xAcetyl:2H(3) [K96; K100; K119; K120]	FALSE	0.00102765	0	1	7	20	Q6FI13	Q16777 [90-122]; Q99878 [90-122]; Q96KK5 [90-122]; Q9BTM1 [90-122]; P20671 [90-122]; P0C0S8 [90-122]; Q6FI13 [90-122]	0	3723.13	0	100	100	100	4.34403e-17	3.7678e-17	4.94188e-17					95	132.7	172.4		Not Found	High	High	High	High	0	3.911e-06	4.79	86.37
FALSE	High	[R].NDEELNKLLGKVTIAQGGVLPNIQAVLLPKKT.[E]	R	4xAcetyl:2H(3) [K7; K11; K30; K31]	Q16777 4xAcetyl:2H(3) [K96; K100; K119; K120]; Q99878 4xAcetyl:2H(3) [K96; K100; K119; K120]; Q96KK5 4xAcetyl:2H(3) [K96; K100; K119; K120]; Q9BTM1 4xAcetyl:2H(3) [K96; K100; K119; K120]; P20671 4xAcetyl:2H(3) [K96; K100; K119; K120]; P0C0S8 4xAcetyl:2H(3) [K96; K100; K119; K120]; Q6FI13 4xAcetyl:2H(3) [K96; K100; K119; K120]	FALSE	0.00231667	0	1	7	10	Q6FI13	Q16777 [90-121]; Q99878 [90-121]; Q96KK5 [90-121]; Q9BTM1 [90-121]; P20671 [90-121]; P0C0S8 [90-121]; Q6FI13 [90-121]	0	3594.09	0	0.999	1.261	1.586	0.898637	0.7103	0.33964	0	0	0	82.6	82.5	104.1	130.9		High	Peak Found	High	High	High	0	0.0006481	3.58	86.23
FALSE	High	[R].NDEELNKLLGKVTIAQGGVLPNIQAVLLPK.[K]	R	3xAcetyl:2H(3) [K7; K11; K30]	Q16777 3xAcetyl:2H(3) [K96; K100; K119]; Q99878 3xAcetyl:2H(3) [K96; K100; K119]; Q96KK5 3xAcetyl:2H(3) [K96; K100; K119]; Q9BTM1 3xAcetyl:2H(3) [K96; K100; K119]; P20671 3xAcetyl:2H(3) [K96; K100; K119]; P0C0S8 3xAcetyl:2H(3) [K96; K100; K119]; Q6FI13 3xAcetyl:2H(3) [K96; K100; K119]	FALSE	0.00295808	0	1	7	6	Q6FI13	Q16777 [90-119]; Q99878 [90-119]; Q96KK5 [90-119]; Q9BTM1 [90-119]; P20671 [90-119]; P0C0S8 [90-119]; Q6FI13 [90-119]	0	3319.92	0	1.152	3.181	4.726	0.819268	0.487944	0.104901	0	0	0	39.8	45.8	126.5	187.9		Peak Found	High	High	High	High	0	2.384e-05	5.37	87.53
FALSE	High	[R].NDEELNKLLGKVTIAQGGVLPN.[I]	R	2xAcetyl:2H(3) [K7; K11]	Q16777 2xAcetyl:2H(3) [K96; K100]; Q99878 2xAcetyl:2H(3) [K96; K100]; Q96KK5 2xAcetyl:2H(3) [K96; K100]; Q9BTM1 2xAcetyl:2H(3) [K96; K100]; P20671 2xAcetyl:2H(3) [K96; K100]; P0C0S8 2xAcetyl:2H(3) [K96; K100]; Q6FI13 2xAcetyl:2H(3) [K96; K100]	FALSE	0.000217476	0	1	7	11	Q6FI13	Q16777 [90-111]; Q99878 [90-111]; Q96KK5 [90-111]; Q9BTM1 [90-111]; P20671 [90-111]; P0C0S8 [90-111]; Q6FI13 [90-111]	0	2412.33	0	0.32	0.426	0.83	0.249717	0.392637	0.989202	0	0	0	155.3	49.7	66.1	128.9		High	High	Peak Found	High	High	6.911e-05	0.0015	4.1	71.99
FALSE	High	[R].SGSMDPSGAHPSVR.[Q]	R	1xAcetyl:2H(3) [N-Term]	Q07666 1xAcetyl:2H(3) [N-Term]	FALSE	0.00109912	0	1	1	1	Q07666	Q07666 [18-31]	0	1429.66	0	0.028	0.01	0.02	1.22993e-09	3.7678e-17	1.4533e-12	0	0	0	378.4	10.4	3.6	7.5		High	Peak Found	Peak Found	Peak Found	High	0	4.388e-06	4.06	22.05
FALSE	High	[R].NDAKNAVEEYVYEFR.[D]	R	1xAcetyl:2H(3) [K4]	Q92598 1xAcetyl:2H(3) [K635]	FALSE	0.0063469	0	1	1	3	Q92598	Q92598 [632-646]	0	1891.89	1	0.052	0.01	0.115	0.00801077	3.7678e-17	0.0650665	0		0	342.6	18		39.4		High	Peak Found	Not Found	Peak Found	High	0	8.704e-05	4.23	61.14
FALSE	High	[R].NAVTQEFGPVPDTAR.[Y]	R			FALSE	0.000439327	0	1	1	1	Q99798	Q99798 [634-648]	0	1601.79	0	0.337	0.172	1.005	0.663681	0.50161	0.936841	0	0	0	159.1	53.7	27.4	159.9		Peak Found	Peak Found	Peak Found	High	High	0	9.282e-07	4.43	37.1
FALSE	High	[R].NATDAVGIVLKELKR.[Q]	R	2xAcetyl:2H(3) [K11; K14]	P51398 2xAcetyl:2H(3) [K245; K248]	FALSE	0.00281697	0	1	1	2	P51398	P51398 [235-249]	0	1717.01	0	0.608	0.605	1.014	0.976309	0.99776	0.942957	0	0	0	123.9	75.3	75	125.7		Peak Found	Peak Found	Peak Found	High	High	0	5.934e-05	4.91	67.49
FALSE	High	[R].NALDLLLPKLAR.[V]	R	1xAcetyl:2H(3) [K9]	P30566 1xAcetyl:2H(3) [K134]	FALSE	0.0183087	0	1	1	1	P30566	P30566 [126-137]	0	1381.86	0	4.271	0.191	5.256	0.103008	0.652865	0.0506128	0	0	0	37.3	159.4	7.1	196.2		Peak Found	High	Peak Found	Peak Found	High	0	0.0005305	3.03	67.73
FALSE	High	[Y].SGSPANLAVYTALLQPHDR.[I]	Y	1xAcetyl:2H(3) [N-Term]	P34897 1xAcetyl:2H(3) [N-Term]	FALSE	0.000398384	0	1	1	2	P34897	P34897 [142-160]	0	2055.07	0	0.888	0.024	1.177	0.935283	0.0436753	0.888954	0	0	0	129.5	115	3	152.4		Peak Found	High	Peak Found	High	High	0	7.871e-07	5.59	60.67
FALSE	High	[E].NADLPEGEKKPIDQR.[L]	E	2xAcetyl:2H(3) [K9; K10]; 1xAcetyl:2H(3) [N-Term]	Q99460 2xAcetyl:2H(3) [K123; K124]; 1xAcetyl:2H(3) [N-Term]	FALSE	0.00586275	0	1	1	3	Q99460	Q99460 [115-129]	0	1844.97	0	100	100	100	4.34403e-17	3.7678e-17	4.94188e-17					211.5	47.1	141.4		Not Found	High	High	Peak Found	High	0	7.631e-05	4.05	36.51
FALSE	High	[-].MYIKQVIIQGFR.[S]	-	1xAcetyl:2H(3) [K4]; 1xAcetyl:2H(3) [N-Term]	Q9UQE7 1xAcetyl:2H(3) [K4]; 1xAcetyl:2H(3) [N-Term]	FALSE	0.00476368	0	1	1	18	Q9UQE7	Q9UQE7 [1-12]	0	1585.9	0	0.684	0.708	0.839	0.969906	0.964539	0.98567	0	0	0	123.8	84.7	87.7	103.8		High	High	High	High	High	0	0.0005836	3.75	88.02
FALSE	High	[-].MVVSKMNKDAQMR.[A]	-	1xAcetyl [N-Term]; 2xAcetyl:2H(3) [K5; K8]	Q9NPA8 1xAcetyl [N-Term]; 2xAcetyl:2H(3) [K5; K8]	FALSE	0.00230256	0	1	1	8	Q9NPA8	Q9NPA8 [1-13]	0	1669.83	0	0.748	0.534	0.695	0.985294	0.959081	0.985609	0	0	0	134.4	100.5	71.8	93.3		Peak Found	High	High	High	High	0	1.552e-05	4.1	50.69
FALSE	High	[E].MVQVFIPAQAVGAIIGKKGQHIKQLSR.[F]	E	3xAcetyl:2H(3) [K17; K18; K23]; 1xAcetyl:2H(3) [N-Term]	Q9NZI8 3xAcetyl:2H(3) [K423; K424; K429]; 1xAcetyl:2H(3) [N-Term]	FALSE	0.000251851	0	1	1	51	Q9NZI8	Q9NZI8 [407-433]	0	3097.81	0	100	100	100	4.34403e-17	3.7678e-17	4.94188e-17					54.8	144.9	200.3		Not Found	High	High	High	High	0	5.3e-06	3.89	86.36
FALSE	High	[R].MVQEAEKYKAEDEVQR.[E]	R	2xAcetyl:2H(3) [K7; K9]	P0DMV9 2xAcetyl:2H(3) [K524; K526]	FALSE	0.00795416	0	1	1	1	P0DMV9	P0DMV9 [518-533]	0	2043	0	0.089	0.013	0.323	0.0371617	0.00243058	0.421196	0	0	0	280.7	24.9	3.7	90.6		High	Peak Found	Peak Found	Peak Found	High	0	0.0001278	4.12	34.82
FALSE	High	[M].SGTNLDGNDEFDEQLR.[M]	M	1xAcetyl [N-Term]	O43719 1xAcetyl [N-Term]	FALSE	0.0063469	0	1	1	1	O43719	O43719 [2-17]	0	1851.8	0	0.01	0.01	0.01	4.34403e-17	3.7678e-17	4.94188e-17				400					High	Not Found	Not Found	Not Found	High	0	8.735e-05	3.33	43.27
FALSE	High	[R].MVQEAEKYKAEDEKQR.[D]	R	3xAcetyl:2H(3) [K7; K9; K14]	P11142 3xAcetyl:2H(3) [K524; K526; K531]	FALSE	8.07634e-05	0	1	1	7	P11142	P11142 [518-533]	0	2117.05	0	0.091	0.011	0.34	0.038201	0.00796251	0.547256	0	0	0	277.3	25.1	3.2	94.4		High	Peak Found	Peak Found	High	High	0	1.232e-07	5.59	31.95
FALSE	High	[-].MVPPVQVSPLIKLGR.[Y]	-	1xAcetyl:2H(3) [K12]; 1xAcetyl:2H(3) [N-Term]	P56385 1xAcetyl:2H(3) [K12]; 1xAcetyl:2H(3) [N-Term]	FALSE	0.0290124	0	1	1	11	P56385	P56385 [1-15]	0	1724.04	0	0.551	0.678	0.914	0.915733	0.965822	0.963108	0	0	0	127.3	70.1	86.3	116.3		High	High	High	High	High	0.001765	0.02527	2.8	68.44
FALSE	High	[R].NDGAAILAAVSSIAQKIR.[M]	R	1xAcetyl:2H(3) [K16]	P28331 1xAcetyl:2H(3) [K499]	FALSE	0.000103775	0	1	1	5	P28331	P28331 [484-501]	0	1843.05	0	0.04	0.01	0.817	0.00696221	3.7678e-17	0.99558	0		0	215.4	8.5		176		High	Peak Found	Not Found	High	High	0	5.968e-07	4.77	78.83
FALSE	High	[S].SGQHQNDKGKNVR.[Q]	S	2xAcetyl:2H(3) [K8; K10]; 1xAcetyl:2H(3) [N-Term]	P35613 2xAcetyl:2H(3) [K375; K377]; 1xAcetyl:2H(3) [N-Term]	FALSE	0.0133488	0	1	1	2	P35613	P35613 [368-380]	0	1602.83	0	1.8	2.386	0.75	0.517203	0.632407	0.987852	0	0	0	67.4	121.3	160.8	50.5		High	Peak Found	Peak Found	High	High	0	0.0003083	3.96	16.33
FALSE	High	[R].NDIKLAAKLIHTLDDR.[T]	R	2xAcetyl:2H(3) [K4; K8]	Q9BXP5 2xAcetyl:2H(3) [K522; K526]	FALSE	0.0055833	0	1	1	2	Q9BXP5	Q9BXP5 [519-534]	0	1926.09	0	0.21	0.01	1.802	0.527873	3.7678e-17	0.584218	0		0	132.8	27.8		239.3		High	Peak Found	Not Found	Peak Found	High	0.0007442	0.0131	2.98	65.93
FALSE	High	[R].NDLSPTTVMSEGAR.[N]	R			FALSE	0.0180878	0	1	1	3	P30043	P30043 [79-92]	0	1477.7	0	0.493	0.582	0.766	0.885516	0.957205	0.99558	0	0	0	140.7	69.4	82	107.9		Peak Found	High	Peak Found	High	High	0.0001879	0.00358	3.95	34.78
FALSE	High	[R].NKPSDLGTKLQDPR.[I]	R	2xAcetyl:2H(3) [K2; K9]	P31948 2xAcetyl:2H(3) [K162; K169]	FALSE	0.00712709	0	1	1	3	P31948	P31948 [161-174]	0	1658.9	0	0.278	0.369	0.415	0.30312	0.502984	0.52762	0	0	0	193.9	54	71.7	80.4		High	High	Peak Found	Peak Found	High	0	0.0001065	4.35	35.55
FALSE	High	[R].NKPFKFMLGKQEVIR.[G]	R	3xAcetyl:2H(3) [K2; K5; K10]	P62942 3xAcetyl:2H(3) [K45; K48; K53]	FALSE	0.0028516	0	1	1	4	P62942	P62942 [44-58]	0	1970.12	0	0.836	2.275	1.194	0.960927	0.628637	0.888733	0	0	0	75.4	63	171.5	90.1		High	Peak Found	High	Peak Found	High	0	2.235e-05	4.77	60.54
FALSE	High	[R].NKNPAPPIDAVEQILPTLVR.[L]	R	1xAcetyl:2H(3) [K2]	P52292 1xAcetyl:2H(3) [K240]	FALSE	0.00159576	0	1	1	2	P52292	P52292 [239-258]	0	2230.26	0	1.278	2.305	2.949	0.776272	0.598064	0.282489	0	0	0	53.1	67.9	122.4	156.6		Peak Found	Peak Found	High	High	High	0	8.311e-06	3.43	71.59
FALSE	High	[R].SGLAAKHFIDVGAGVIDEDYR.[G]	R	1xAcetyl:2H(3) [K6]; 1xAcetyl:2H(3) [N-Term]	P33316 1xAcetyl:2H(3) [K179]; 1xAcetyl:2H(3) [N-Term]	FALSE	1.87302e-05	0	1	1	2	P33316	P33316 [174-194]	0	2323.18	0	0.598	0.907	2.974	0.974516	0.943729	0.278618	0	0	0	73	43.7	66.2	217.1		High	High	Peak Found	Peak Found	High	0	1.458e-08	6.77	65.91
FALSE	High	[E].NGTVTAANASTLNDGAAALVLMTADAAKR.[L]	E	1xAcetyl:2H(3) [K28]; 1xAcetyl:2H(3) [N-Term]	P24752 1xAcetyl:2H(3) [K302]; 1xAcetyl:2H(3) [N-Term]	FALSE	0.00164528	0	1	1	2	P24752	P24752 [275-303]	0	2878.48	0	100	100	100	4.34403e-17	3.7678e-17	4.94188e-17					83.3	126.6	190.1		Not Found	High	Peak Found	Peak Found	High	0	8.748e-06	4.16	72.83
FALSE	High	[E].NGKVVGVKSEGEVAR.[C]	E	2xAcetyl:2H(3) [K3; K8]; 1xAcetyl:2H(3) [N-Term]	P31150 2xAcetyl:2H(3) [K264; K269]; 1xAcetyl:2H(3) [N-Term]	FALSE	0.00131229	0	1	1	42	P31150	P31150 [262-276]	0	1663.93	0	100	100	100	4.34403e-17	3.7678e-17	4.94188e-17					152.8	133.5	113.7		Not Found	High	High	High	High	0	5.981e-06	4.43	36.77
FALSE	High	[R].NGKTSKKITIADCGQLE.[-]	R	1xCarbamidomethyl [C13]; 3xAcetyl:2H(3) [K3; K6; K7]	P62937 1xCarbamidomethyl [C161]; 3xAcetyl:2H(3) [K151; K154; K155]	FALSE	0.0135946	0	1	1	3	P62937	P62937 [149-165]	0	1998.05	0	0.336	0.088	0.734	0.654413	0.240331	0.985099	0	0	0	185.4	62.2	16.3	136.1		High	Peak Found	Peak Found	Peak Found	High	0	0.0005896	3.63	44.93
FALSE	High	[M].SGLIADAKTLIDKAR.[V]	M	2xAcetyl:2H(3) [K8; K13]; 1xAcetyl:2H(3) [N-Term]	P28066 2xAcetyl:2H(3) [K86; K91]; 1xAcetyl:2H(3) [N-Term]	FALSE	0.0306331	0	1	1	2	P28066	P28066 [79-93]	0	1707	0	0.01	0.01	0.01	4.34403e-17	3.7678e-17	4.94188e-17				400					High	Not Found	Not Found	Not Found	High	0	0.001287	4.45	82.5
FALSE	High	[R].NGEMIKKIQNDAGVR.[I]	R	2xAcetyl:2H(3) [K6; K7]	Q96AE4 2xAcetyl:2H(3) [K299; K300]; Q96I24 2xAcetyl:2H(3) [K277; K278]	FALSE	0.00198846	0	2	2	4	Q96AE4; Q96I24	Q96AE4 [294-308]; Q96I24 [272-286]	0	1762.94	0	0.692	0.161	1.493	0.976309	0.235614	0.463731	0	0	0	119.6	82.7	19.2	178.5	Shared	High	Peak Found	High	High	High	0	1.207e-05	5.35	44.27
FALSE	High	[R].NFSDNQLQEGKNVIGLQMGTNR.[G]	R	1xAcetyl:2H(3) [K11]	P37802 1xAcetyl:2H(3) [K171]	FALSE	0.0159222	0	1	1	1	P37802	P37802 [161-182]	0	2508.23	0	0.715	0.983	0.671	0.990651	0.950732	0.947831	0	0	0	118.7	84.9	116.7	79.7		Peak Found	Peak Found	Peak Found	High	High	0	0.0004186	2.89	50.96
FALSE	High	[R].NFILDQTNVSAAAQR.[R]	R			FALSE	0.0127147	0	1	1	1	Q00839	Q00839 [576-590]	0	1647.84	0	0.621	0.822	1.248	0.888572	0.993346	0.65182	0	0	0	108.4	67.3	89.1	135.2		Peak Found	Peak Found	High	Peak Found	High	0	0.0002838	4.23	41.98
FALSE	High	[M].PAVSLPPKENALFKR.[I]	M	2xAcetyl:2H(3) [K8; K14]; 1xAcetyl:2H(3) [N-Term]	Q9BXJ9 2xAcetyl:2H(3) [K9; K15]; 1xAcetyl:2H(3) [N-Term]	FALSE	0.0205455	0	1	1	1	Q9BXJ9	Q9BXJ9 [2-16]	0	1802.05	0	100	100	100	4.34403e-17	3.7678e-17	4.94188e-17					111.3	132.1	156.5		Not Found	High	Peak Found	Peak Found	High	0	0.0006453	2.62	57.5
FALSE	High	[A].SGPPVSELITKAVAASKER.[S]	A	2xAcetyl:2H(3) [K11; K17]	P16402 2xAcetyl:2H(3) [K47; K53]; P10412 2xAcetyl:2H(3) [K46; K52]; P16403 2xAcetyl:2H(3) [K46; K52]	FALSE	0.00159576	0	3	3	4	P16402; P10412; P16403	P16402 [37-55]; P10412 [36-54]; P16403 [36-54]	0	2030.14	0	0.496	0.365	0.423	0.946777	0.902282	0.727476	0	0	0	175.1	86.9	63.9	74	Shared	Peak Found	High	Peak Found	Peak Found	High	0	8.297e-06	3.76	74.3
FALSE	High	[R].NEMQKLQAEAPHIVVGTPGR.[V]	R	1xAcetyl:2H(3) [K5]	Q14240 1xAcetyl:2H(3) [K147]	FALSE	0.00419024	0	1	1	1	Q14240	Q14240 [143-162]	0	2220.16	0	0.152	0.198	0.276	0.183543	0.620829	0.428665	0	0	0	245.8	37.4	48.8	68		Peak Found	Peak Found	Peak Found	High	High	0	4.298e-05	2.95	46.95
FALSE	High	[R].NELSGALTGLTR.[V]	R			FALSE	0.00334254	0	1	1	9	P26639	P26639 [443-454]	0	1231.66	0	0.511	0.703	0.516	0.751166	0.942748	0.744876	0	0	0	146.5	74.8	103	75.6		High	Peak Found	Peak Found	High	High	0	0.0001216	3.62	44.09
FALSE	High	[R].NELMKLPSDVVTAVR.[G]	R	1xAcetyl:2H(3) [K5]	P04181 1xAcetyl:2H(3) [K362]	FALSE	0.000972636	0	1	1	3	P04181	P04181 [358-372]	0	1716.94	0	0.567	0.741	0.568	0.780563	0.950229	0.768141	0	0	0	139.1	78.8	103.1	79		Peak Found	Peak Found	High	High	High	0	0.0001216	4.04	55.07
FALSE	High	[E].NELLGAAAAIEAAAKKLEQLKPR.[A]	E	3xAcetyl:2H(3) [K15; K16; K21]; 1xAcetyl:2H(3) [N-Term]	Q9Y490 3xAcetyl:2H(3) [K2321; K2322; K2327]; 1xAcetyl:2H(3) [N-Term]	FALSE	2.80419e-05	0	1	1	9	Q9Y490	Q9Y490 [2307-2329]	0	2585.51	0	100	100	100	4.34403e-17	3.7678e-17	4.94188e-17					98.9	114.9	186.2		Not Found	High	High	High	High	0	8.552e-09	4.9	102.29
FALSE	High	[R].NEKKQQMGKEYR.[E]	R	3xAcetyl:2H(3) [K3; K4; K9]	P31946 3xAcetyl:2H(3) [K76; K77; K82]	FALSE	0.0130279	0	1	1	4	P31946	P31946 [74-85]	0	1673.86	0	1.226	1.377	1.498	0.737685	0.602953	0.403888	0	0	0	78.4	96.2	108	117.5		High	Peak Found	High	High	High	0	0.0005774	4.56	25.19
FALSE	High	[R].NEKEKVLIEGSINSVR.[V]	R	2xAcetyl:2H(3) [K3; K5]	P59998 2xAcetyl:2H(3) [K58; K60]	FALSE	0.000898334	0	1	1	1	P59998	P59998 [56-71]	0	1905.06	0	0.718	0.91	0.471	0.994179	0.951719	0.848385	0	0	0	129.1	92.7	117.5	60.8		High	Peak Found	Peak Found	Peak Found	High	0	3.118e-06	6.28	49.36
FALSE	High	[R].NEFLGELQKKEEEMR.[Q]	R	2xAcetyl:2H(3) [K9; K10]	Q14141 2xAcetyl:2H(3) [K337; K338]; Q9NVA2 2xAcetyl:2H(3) [K336; K337]	FALSE	0.00175969	0	1	2	1	Q9NVA2	Q14141 [329-343]; Q9NVA2 [328-342]	0	1969.98	0	0.119	0.012	0.172	0.0938509	0.00620281	0.200323	0	0	0	306.9	36.5	3.8	52.8		High	Peak Found	Peak Found	Peak Found	High	0	9.798e-06	5.87	58.25
FALSE	High	[R].NEEDAAELVALAQAVNAR.[A]	R			FALSE	1.99112e-05	0	1	1	19	P22314	P22314 [351-368]	0	1883.95	0	0.872	0.419	1.356	0.974516	0.374423	0.540878	0	0	0	109.7	95.6	46	148.7		High	High	High	High	High	0	3.82e-07	5.57	58.12
FALSE	High	[HN].SGPVVAMVWEGLNVVKTGR.[V]	H	1xAcetyl:2H(3) [K16]; 1xAcetyl:2H(3) [N-Term]	P15531 1xAcetyl:2H(3) [K85]; 1xAcetyl:2H(3) [N-Term]; O60361 1xAcetyl:2H(3) [K70]; 1xAcetyl:2H(3) [N-Term]; P22392 1xAcetyl:2H(3) [K85]; 1xAcetyl:2H(3) [N-Term]	FALSE	4.51792e-05	0	1	3	70	P22392	P15531 [70-88]; O60361 [55-73]; P22392 [70-88]	0	2089.14	0	0.48	0.683	1.05	0.588735	0.903574	0.854985	0	0	0	124.5	59.7	85	130.7		High	High	High	High	High	0	3.919e-08	5.98	93.23
FALSE	High	[R].NDVLDSLGISPDLLPEDFVR.[Y]	R			FALSE	0.00022286	0	1	1	8	Q9UBE0	Q9UBE0 [274-293]	0	2214.13	0	0.513	0.77	0.786	0.774076	0.969912	0.994574	0	0	0	130.3	66.9	100.3	102.4		High	High	High	High	High	0	2.793e-06	5.39	72.98
FALSE	High	[R].NDTKEDVFVHQTAIKKNNPR.[K]	R	3xAcetyl:2H(3) [K4; K15; K16]	P16989 3xAcetyl:2H(3) [K113; K124; K125]; P67809 3xAcetyl:2H(3) [K81; K92; K93]	FALSE	0.000269373	0	2	2	1	P16989; P67809	P16989 [110-129]; P67809 [78-97]	0	2489.31	0	100		100	4.34403e-17		4.94188e-17					67.1		332.9	Shared	Not Found	Peak Found	Not Found	High	High	0	4.041e-07	3.66	39.25
FALSE	High	[E].NFAVEAANYQDTIGR.[L]	E	1xAcetyl:2H(3) [N-Term]	P08670 1xAcetyl:2H(3) [N-Term]	FALSE	0.0237619	0	1	1	7	P08670	P08670 [350-364]	0	1713.83	0	27.156	15.148	19.051	3.05159e-06	0.0458447	2.8511e-05	0	0	0	6.4	174.2	97.2	122.2		Peak Found	High	High	Peak Found	High	0.0001879	0.002842	3.82	51.57
FALSE	High	[M].SGEENPASKPTPVQDVQGDGR.[W]	M	1xAcetyl [N-Term]; 1xAcetyl:2H(3) [K9]	Q15102 1xAcetyl [N-Term]; 1xAcetyl:2H(3) [K10]	FALSE	0.00213976	0	1	1	5	Q15102	Q15102 [2-22]	0	2255.06	0	1.667	2.413	0.554	0.567697	0.568327	0.919342	0	0	0	71	118.3	171.3	39.3		Peak Found	Peak Found	Peak Found	High	High	0	0.0001745	3.98	32.97
FALSE	High	[R].SGDSEVYQLGDVSQKTTWHR.[I]	R	1xAcetyl:2H(3) [K15]; 1xAcetyl:2H(3) [N-Term]	Q04837 1xAcetyl:2H(3) [K81]; 1xAcetyl:2H(3) [N-Term]	FALSE	0.00503282	0	1	1	6	Q04837	Q04837 [67-86]	0	2383.14	0	0.424	0.353	0.779	0.810639	0.811342	0.99558	0	0	0	156.5	66.3	55.3	121.9		Peak Found	High	High	High	High	0	0.0001057	4.95	48.17
FALSE	High	[M].PDPAKSAPAPKKGSKKAVTKAQKKDGKKR.[K]	M	10xAcetyl:2H(3) [K5; K11; K12; K15; K16; K20; K23; K24; K27; K28]; 1xAcetyl:2H(3) [N-Term]	Q93079 10xAcetyl:2H(3) [K6; K12; K13; K16; K17; K21; K24; K25; K28; K29]; 1xAcetyl:2H(3) [N-Term]; P23527 10xAcetyl:2H(3) [K6; K12; K13; K16; K17; K21; K24; K25; K28; K29]; 1xAcetyl:2H(3) [N-Term]	FALSE	0.00071648	0	1	2	62	P23527	Q93079 [2-30]; P23527 [2-30]	0	3541.12	0	0.593	0.434	0.688	0.815155	0.413003	0.931908	0	0	0	147.4	87.3	63.9	101.4		High	High	High	High	High	0	2.134e-06	4.39	43.93
FALSE	High	[R].SEDLLDYGPFR.[D]	R	1xAcetyl:2H(3) [N-Term]	P04843 1xAcetyl:2H(3) [N-Term]	FALSE	0.0278106	0	1	1	4	P04843	P04843 [194-204]	0	1356.65	0	0.183	0.01	0.358	0.275958	3.7678e-17	0.685974	0		0	259.4	47.6		93		High	Peak Found	Not Found	Peak Found	High	0	0.001085	2.28	63.26
FALSE	High	[R].QTVAVGVIKAVDKKAAGAGKVTKSAQKAQKAK.[-]	R	8xAcetyl:2H(3) [K9; K13; K14; K20; K23; K27; K30; K32]	P68104 8xAcetyl:2H(3) [K439; K443; K444; K450; K453; K457; K460; K462]; Q5VTE0 8xAcetyl:2H(3) [K439; K443; K444; K450; K453; K457; K460; K462]	FALSE	0.0219622	0	1	2	3	P68104	P68104 [431-462]; Q5VTE0 [431-462]	0	3540.13	0	5.966	8.606	5.967	0.0308655	0.129867	0.0502388	0	0	0	18.6	110.8	159.8	110.8		Peak Found	Peak Found	High	Peak Found	High	0.0006112	0.01027	4.15	64.98
FALSE	High	[F].QSTLVIAEHANDSLAPITLNTITAATR.[L]	F	1xAcetyl:2H(3) [N-Term]	P13804 1xAcetyl:2H(3) [N-Term]	FALSE	0.00984574	0	1	1	2	P13804	P13804 [20-46]	0	2866.53	0	1.114	1.005	0.819	0.849179	0.942748	0.994574	0	0	0	101.6	113.1	102.1	83.2		Peak Found	High	Peak Found	Peak Found	High	0	0.0001839	5.13	65.72
FALSE	High	[M].SEKSVEAAAELSAKDLKEKKEKVEEKASR.[K]	M	1xAcetyl [N-Term]; 7xAcetyl:2H(3) [K3; K14; K17; K19; K20; K22; K26]	P20962 1xAcetyl [N-Term]; 7xAcetyl:2H(3) [K4; K15; K18; K20; K21; K23; K27]	FALSE	2.26393e-05	0	1	1	2	P20962	P20962 [2-30]	0	3574.94	0	0.308	0.523	0.274	0.378747	0.748474	0.199652	0	0	0	190	58.5	99.4	52		High	High	Peak Found	Peak Found	High	0	5.934e-09	5.91	79.03
FALSE	High	[E].QQQLIDDHFLFDKPVSPLLTAAGMAR.[D]	E	1xAcetyl:2H(3) [K13]; 1xAcetyl:2H(3) [N-Term]	P12532 1xAcetyl:2H(3) [K229]; 1xAcetyl:2H(3) [N-Term]	FALSE	0.00126503	0	1	1	11	P12532	P12532 [217-242]	0	3001.57	0	100	100	100	4.34403e-17	3.7678e-17	4.94188e-17					157.8	157.8	84.4		Not Found	High	High	High	High	0	0.0007045	4.97	73.57
FALSE	High	[E].QQQLIDDHFLFDKPVSPLLLASGMAR.[D]	E	1xAcetyl:2H(3) [K13]; 1xAcetyl:2H(3) [N-Term]	P06732 1xAcetyl:2H(3) [K196]; 1xAcetyl:2H(3) [N-Term]; P12277 1xAcetyl:2H(3) [K196]; 1xAcetyl:2H(3) [N-Term]	FALSE	9.5845e-05	0	1	2	4	P12277	P06732 [184-209]; P12277 [184-209]	0	3029.6	0	26.456	21.59	17.36	6.08444e-09	9.97994e-05	1.32793e-06	0	0	0	6	159.4	130	104.6		Peak Found	High	Peak Found	High	High	0	6.062e-07	5.34	76.64
FALSE	High	[R].QIQAAYSILSEVQQAVSQGSSDSQILDLSNR.[F]	R	1xAcetyl:2H(3) [N-Term]	P09874 1xAcetyl:2H(3) [N-Term]	FALSE	0.00153831	0	1	1	1	P09874	P09874 [705-735]	0	3380.7	0	0.01	0.01	0.136	4.34403e-17	3.7678e-17	0.0640185			0	352.1			47.9		High	Not Found	Not Found	Peak Found	High	0	7.775e-06	4.58	90.64
FALSE	High	[R].QLFHPEQLITGKEDAANNYAR.[G]	R	1xAcetyl:2H(3) [K12]; 1xAcetyl:2H(3) [N-Term]	Q13748 1xAcetyl:2H(3) [K96]; 1xAcetyl:2H(3) [N-Term]; Q71U36 1xAcetyl:2H(3) [K96]; 1xAcetyl:2H(3) [N-Term]; Q9NY65 1xAcetyl:2H(3) [K96]; 1xAcetyl:2H(3) [N-Term]; P68363 1xAcetyl:2H(3) [K96]; 1xAcetyl:2H(3) [N-Term]; Q9BQE3 1xAcetyl:2H(3) [K96]; 1xAcetyl:2H(3) [N-Term]; P68366 1xAcetyl:2H(3) [K96]; 1xAcetyl:2H(3) [N-Term]	FALSE	0.00132033	0	2	6	2	Q13748; P68363	Q13748 [85-105]; Q71U36 [85-105]; Q9NY65 [85-105]; P68363 [85-105]; Q9BQE3 [85-105]; P68366 [85-105]	0	2505.26	0	8.85	10.543	8.497	0.0108888	0.0843997	0.0220257	0	0	0	13.8	122.5	146	117.6	Shared	Peak Found	High	High	Peak Found	High	0	6.002e-06	5.25	57.98
FALSE	High	[A].QHSNAAQTQTGEANR.[G]	A	1xAcetyl:2H(3) [N-Term]	P34897 1xAcetyl:2H(3) [N-Term]	FALSE	0.000433988	0	1	1	1	P34897	P34897 [27-41]	0	1657.77	0	0.01	0.01	0.024	4.34403e-17	3.7678e-17	2.08025e-05			0	390.7			9.3		High	Not Found	Not Found	Peak Found	High	0	9.06e-07	5.58	14.94
FALSE	High	[R].QGQQQAGGKKKAEGGGGGGRPGAPAAGDGKTEQKGGDKKR.[G]	R	7xAcetyl:2H(3) [K9; K10; K11; K30; K34; K38; K39]	Q00839 7xAcetyl:2H(3) [K213; K214; K215; K234; K238; K242; K243]	FALSE	0.000181027	0	1	1	16	Q00839	Q00839 [205-244]	0	4120.16	0	0.427	0.259	1.495	0.829491	0.752906	0.784843	0	0	0	125.8	53.7	32.5	188		High	High	High	High	High	0	9.428e-07	5.18	24.39
FALSE	High	[E].QGFITDPVVLSPKDR.[V]	E	1xAcetyl:2H(3) [K13]; 1xAcetyl:2H(3) [N-Term]	P12268 1xAcetyl:2H(3) [K124]; 1xAcetyl:2H(3) [N-Term]	FALSE	0.00845426	0	1	1	10	P12268	P12268 [112-126]	0	1761.97	0	3.043	2.296	2.962	0.0354981	0.201901	0.0160907	0	0	0	43	130.9	98.7	127.4		Peak Found	High	High	High	High	0	0.0009525	3.73	57.96
FALSE	High	[E].QFLLPVINEMR.[E]	E	1xAcetyl:2H(3) [N-Term]	Q9Y605 1xAcetyl:2H(3) [N-Term]; Q96HT8 1xAcetyl:2H(3) [N-Term]	FALSE	0.0200531	0	1	2	8	Q96HT8	Q9Y605 [26-36]; Q96HT8 [26-36]	0	1404.77	0	100	100	100	4.34403e-17	3.7678e-17	4.94188e-17					89	118.3	192.7		Not Found	High	High	Peak Found	High	0	0.0006222	3.09	78.9
FALSE	High	[E].QEKLLDEAIQAVKVQSFQMKR.[C]	E	3xAcetyl:2H(3) [K3; K13; K20]; 1xAcetyl:2H(3) [N-Term]	Q96QK1 3xAcetyl:2H(3) [K14; K24; K31]; 1xAcetyl:2H(3) [N-Term]	FALSE	8.58558e-05	0	1	1	3	Q96QK1	Q96QK1 [12-32]	0	2669.47	0			100			4.94188e-17							400		Not Found	Not Found	Not Found	High	High	0	5.022e-06	6.32	85.09
FALSE	High	[R].QEAEEAKEALLQASR.[D]	R	1xAcetyl:2H(3) [K7]	P26038 1xAcetyl:2H(3) [K400]	FALSE	0.00815056	0	1	1	1	P26038	P26038 [394-408]	0	1717.88	1	1.05	0.242	0.833	0.87306	0.421752	0.987815	0	0	0	128	134.4	30.9	106.7		Peak Found	Peak Found	Peak Found	High	High	0	0.0001336	3.04	45.47
FALSE	High	[R].SELGKLSLDKVFR.[E]	R	2xAcetyl:2H(3) [K5; K10]; 1xAcetyl:2H(3) [N-Term]	Q9UJZ1 2xAcetyl:2H(3) [K140; K145]; 1xAcetyl:2H(3) [N-Term]	FALSE	0.0214362	0	1	1	7	Q9UJZ1	Q9UJZ1 [136-148]	0	1626.94	0	0.387	0.682	0.26	0.757931	0.973305	0.376869	0	0	0	171.7	66.5	117.1	44.6		High	Peak Found	Peak Found	Peak Found	High	0	0.0006944	4.52	70.28
FALSE	High	[R].QATKDAGVIAGLNVLR.[I]	R	1xAcetyl:2H(3) [K4]	P0DMV9 1xAcetyl:2H(3) [K159]; P34931 1xAcetyl:2H(3) [K161]	FALSE	0.000116559	0	1	2	2	P0DMV9	P0DMV9 [156-171]; P34931 [158-173]	0	1670.96	0	0.255	0.046	0.893	0.368089	0.0172437	0.963141	0	0	0	182.2	46.5	8.5	162.8		High	Peak Found	Peak Found	High	High	0	9.677e-08	5	52.54
FALSE	High	[R].QATKDAGQISGLNVLR.[V]	R	1xAcetyl:2H(3) [K4]	P38646 1xAcetyl:2H(3) [K206]	FALSE	0.000607458	0	1	1	2	P38646	P38646 [203-218]	0	1715.95	0	0.01	0.01	1.159	4.34403e-17	3.7678e-17	0.888312			0	185.3			214.7		Peak Found	Not Found	Not Found	High	High	0	1.602e-06	4.21	43.21
FALSE	High	[E].QALAAEPKAKDPFAHLPKSTFVLDEFKR.[K]	E	4xAcetyl:2H(3) [K8; K10; K18; K27]; 1xAcetyl:2H(3) [N-Term]	P26641 4xAcetyl:2H(3) [K275; K277; K285; K294]; 1xAcetyl:2H(3) [N-Term]	FALSE	0.000395956	0	1	1	4	P26641	P26641 [268-295]	0	3379.85	0	42.041	32.829	13.566	2.42909e-06	0.00534554	0.00366474	0	0	0	4.5	188	146.8	60.7		Peak Found	High	High	Peak Found	High	0	7.732e-07	4.59	71.46
FALSE	High	[R].QAGEVTYADAHKER.[T]	R	1xAcetyl:2H(3) [K12]; 1xAcetyl:2H(3) [N-Term]	Q13247 1xAcetyl:2H(3) [K143]; 1xAcetyl:2H(3) [N-Term]	FALSE	0.0066239	0	1	1	1	Q13247	Q13247 [132-145]	0	1664.81	0	1.103	0.462	1.1	0.849179	0.951719	0.912455	0	0	0	109.2	120.3	50.4	120.1		Peak Found	High	Peak Found	Peak Found	High	0	9.374e-05	5.07	25.83
FALSE	High	[M].PYQYPALTPEQKKELSDIAHR.[I]	M	2xAcetyl:2H(3) [K12; K13]; 1xAcetyl:2H(3) [N-Term]	P04075 2xAcetyl:2H(3) [K13; K14]; 1xAcetyl:2H(3) [N-Term]	FALSE	0.000720874	0	1	1	24	P04075	P04075 [2-22]	0	2619.38	0	0.597	0.773	0.726	0.822727	0.963945	0.963108	0	0	0	129.2	77.1	99.9	93.8		High	High	Peak Found	High	High	0	0.0001833	4.75	55.58
FALSE	High	[M].PYEIKKVFASLPQVER.[G]	M	2xAcetyl:2H(3) [K5; K6]; 1xAcetyl:2H(3) [N-Term]	O75083 2xAcetyl:2H(3) [K6; K7]; 1xAcetyl:2H(3) [N-Term]	FALSE	0.000272687	0	1	1	26	O75083	O75083 [2-17]	0	2039.15	0	0.101	0.158	0.303	0.0479632	0.262283	0.353238	0	0	0	256.1	26	40.4	77.6		High	High	High	High	High	0	4.323e-07	4.63	86.37
FALSE	High	[R].SELHIENLNMEADPGQYR.[C]	R	1xAcetyl:2H(3) [N-Term]	P35613 1xAcetyl:2H(3) [N-Term]	FALSE	0.000248789	0	1	1	1	P35613	P35613 [283-300]	0	2161.01	0	1.871	2.016	1.15	0.378747	0.547004	0.880766	0	0	0	66.3	124	133.6	76.2		Peak Found	High	Peak Found	Peak Found	High	0	3.507e-07	5.47	47.53
FALSE	High	[R].SELIAKIPNFWVTTFVNHPQVSALLGEEDEEALHYLTR.[V]	R	1xAcetyl:2H(3) [K6]; 1xAcetyl:2H(3) [N-Term]	Q01105 1xAcetyl:2H(3) [K90]; 1xAcetyl:2H(3) [N-Term]	FALSE	0.00462041	0	1	1	1	Q01105	Q01105 [85-122]	0	4457.29	0	0.01	0.01	0.01	4.34403e-17	3.7678e-17	4.94188e-17				400					High	Not Found	Not Found	Not Found	High	0	5.089e-05	3.27	93.77
FALSE	High	[R].RAEAEKQLQQAQAAGAEQEVEKFTKR.[L]	R	3xAcetyl:2H(3) [K6; K22; K25]	P39748 3xAcetyl:2H(3) [K109; K125; K128]	FALSE	5.23205e-05	0	1	1	2	P39748	P39748 [104-129]	1	3079.61	0	0.469	0.891	0.379	0.880475	0.951719	0.66199	0	0	0	146.1	68.4	130.2	55.3		High	Peak Found	Peak Found	Peak Found	High	0	2.49e-08	4.71	47.11
FALSE	High	[S].REDSWLKSLFVR.[K]	S	1xAcetyl:2H(3) [K7]; 1xAcetyl:2H(3) [N-Term]	O75323 1xAcetyl:2H(3) [K47]; 1xAcetyl:2H(3) [N-Term]	FALSE	0.0062699	0	1	1	8	O75323	O75323 [41-52]	1	1625.89	0	0.403	0.646	0.542	0.666598	0.943253	0.835967	0	0	0	154.4	62.2	99.8	83.6		High	Peak Found	High	High	High	0	0.0001101	4.88	67.87
FALSE	High	[Y].SAASKQNKLEQVEKELLR.[V]	Y	3xAcetyl:2H(3) [K5; K8; K14]; 1xAcetyl:2H(3) [N-Term]	P48047 3xAcetyl:2H(3) [K51; K54; K60]; 1xAcetyl:2H(3) [N-Term]	FALSE	0.00220615	0	1	1	1	P48047	P48047 [47-64]	0	2251.27	0	0.631	0.483	0.36	0.977205	0.946606	0.635736	0	0	0	161.7	102.1	78.1	58.2		High	Peak Found	Peak Found	Peak Found	High	0	1.436e-05	5.1	71.63
FALSE	High	[M].SADAAAGAPLPR.[L]	M	1xAcetyl [N-Term]	O14745 1xAcetyl [N-Term]	FALSE	0.0288376	0	1	1	3	O14745	O14745 [2-13]	0	1138.59	0	0.903	1.153	0.378	0.929836	0.890526	0.666608	0	0	0	116.5	105.2	134.3	44		Peak Found	Peak Found	Peak Found	High	High	0	0.001156	2.41	28.45
FALSE	High	[M].SDKPDLSEVEKFDR.[S]	M	1xAcetyl [N-Term]; 2xAcetyl:2H(3) [K3; K11]	P0CG35 1xAcetyl [N-Term]; 2xAcetyl:2H(3) [K4; K12]	FALSE	0.0278106	0	1	1	1	P0CG35	P0CG35 [2-15]	0	1796.88	0	0.205	0.115	0.213	0.482711	0.423027	0.220266	0	0	0	260.9	53.5	30.1	55.5		High	Peak Found	Peak Found	Peak Found	High	0	0.001086	2.48	53.51
FALSE	High	[M].SDKLPYKVADIGLAAWGR.[K]	M	1xAcetyl [N-Term]; 2xAcetyl:2H(3) [K3; K7]	P23526 1xAcetyl [N-Term]; 2xAcetyl:2H(3) [K4; K8]	FALSE	3.76074e-05	0	1	1	53	P23526	P23526 [2-19]	0	2092.13	0	0.429	0.771	0.595	0.453817	0.963439	0.823087	0	0	0	143.1	61.4	110.3	85.1		High	High	High	High	High	0	4.737e-06	4.85	78.35
FALSE	High	[R].SDGALLLGASSLSGR.[C]	R	1xAcetyl:2H(3) [N-Term]	Q9BQA1 1xAcetyl:2H(3) [N-Term]	FALSE	0.00762173	0	1	1	1	Q9BQA1	Q9BQA1 [38-52]	0	1448.78	0	0.01	0.01	0.01	4.34403e-17	3.7678e-17	4.94188e-17				400					High	Not Found	Not Found	Not Found	High	0	0.0001192	2.34	54.38
FALSE	High	[E].SDQLLIRPLGAGQEVGR.[S]	E	1xAcetyl:2H(3) [N-Term]	Q9UKF6 1xAcetyl:2H(3) [N-Term]	FALSE	0.0273107	0	1	1	1	Q9UKF6	Q9UKF6 [9-25]	0	1854.03	0	100	100	100	4.34403e-17	3.7678e-17	4.94188e-17					150.8	44.4	204.8		Not Found	Peak Found	High	Peak Found	High	0	0.00106	3.37	49.24
FALSE	High	[R].SDDNEKALKIR.[L]	R	2xAcetyl:2H(3) [K6; K9]; 1xAcetyl:2H(3) [N-Term]	P54819 2xAcetyl:2H(3) [K181; K184]; 1xAcetyl:2H(3) [N-Term]	FALSE	0.0139293	0	1	1	24	P54819	P54819 [176-186]	0	1423.77	0	0.727	0.934	0.55	0.957078	0.956392	0.728542	0	0	0	124.6	90.6	116.4	68.5		High	High	High	High	High	0.002713	0.03497	2.8	36.85
FALSE	High	[M].SDSEKLNLDSIIGR.[L]	M	1xAcetyl [N-Term]; 1xAcetyl:2H(3) [K5]	P62136 1xAcetyl [N-Term]; 1xAcetyl:2H(3) [K6]	FALSE	0.00960868	0	1	1	11	P62136	P62136 [2-15]	0	1633.85	0	0.547	0.97	0.519	0.932796	0.943401	0.888954	0	0	0	131.8	72	127.8	68.4		Peak Found	High	High	High	High	6.911e-05	0.001431	2.12	59.74
FALSE	High	[M].SDAAVDTSSEITTKDLKEKKEVVEEAENGR.[D]	M	1xAcetyl [N-Term]; 4xAcetyl:2H(3) [K14; K17; K19; K20]	P06454 1xAcetyl [N-Term]; 4xAcetyl:2H(3) [K15; K18; K20; K21]	FALSE	0.000105696	0	1	1	18	P06454	P06454 [2-31]	0	3500.75	0	0.01	0.01	0.01	4.34403e-17	3.7678e-17	4.94188e-17				400					High	Not Found	Not Found	Not Found	High	0	8.217e-08	6.43	67.19
FALSE	High	[R].SCKPKPIGKLAR.[E]	R	1xCarbamidomethyl [C2]; 3xAcetyl:2H(3) [K3; K5; K9]; 1xAcetyl:2H(3) [N-Term]	P11586 1xCarbamidomethyl [C326]; 3xAcetyl:2H(3) [K327; K329; K333]; 1xAcetyl:2H(3) [N-Term]	FALSE	0.0135946	0	1	1	3	P11586	P11586 [325-336]	0	1534.92	0	1.228	0.431	1.141	0.803089	0.908509	0.879142	0	0	0	105.2	129.3	45.4	120.1		Peak Found	High	High	High	High	0	0.0003188	3.05	43.1
FALSE	High	[R].SAVDQAGGAQIVIDHLR.[S]	R	1xAcetyl:2H(3) [N-Term]	P52306 1xAcetyl:2H(3) [N-Term]	FALSE	0.00871593	0	1	1	3	P52306	P52306 [125-141]	0	1794.95	0	3.393	0.904	3.719	0.020377	0.961029	0.00334667	0	0	0	44.4	150.5	40.1	165		Peak Found	High	Peak Found	High	High	0	0.000515	2.98	50.96
FALSE	High	[E].SAVAGSAEANAFSVLQHVLGAGPHVKR.[G]	E	1xAcetyl:2H(3) [K26]; 1xAcetyl:2H(3) [N-Term]	P22695 1xAcetyl:2H(3) [K300]; 1xAcetyl:2H(3) [N-Term]	FALSE	0.00619383	0	1	1	2	P22695	P22695 [275-301]	0	2763.48	0	100	100	100	4.34403e-17	3.7678e-17	4.94188e-17					122.4	180.5	97.1		Not Found	High	High	Peak Found	High	0	8.375e-05	4.27	74.16
FALSE	High	[R].SATKVTADVINAAEKLQVVGR.[A]	R	2xAcetyl:2H(3) [K4; K15]; 1xAcetyl:2H(3) [N-Term]	O43175 2xAcetyl:2H(3) [K58; K69]; 1xAcetyl:2H(3) [N-Term]	FALSE	1.4138e-05	0	1	1	5	O43175	O43175 [55-75]	0	2305.31	0	0.219	0.166	1.024	0.0354887	0.00653372	0.877822	0	0	0	166	36.3	27.6	170		Peak Found	High	Peak Found	High	High	0	2.681e-09	4.85	80.88
FALSE	High	[M].PVTEKDLAEDAPWKKIQQNTFTR.[W]	M	3xAcetyl:2H(3) [K5; K14; K15]; 1xAcetyl:2H(3) [N-Term]	O75369 3xAcetyl:2H(3) [K6; K15; K16]; 1xAcetyl:2H(3) [N-Term]	FALSE	4.7155e-05	0	1	1	23	O75369	O75369 [2-24]	0	2895.53	0	0.9	0.292	1.471	0.939655	0.590392	0.560034	0	0	0	109.2	98.2	31.9	160.6		Peak Found	High	Peak Found	High	High	0	5.253e-06	5.22	69.05
FALSE	High	[R].SATKVTADVINAAEKLQVVGR.[A]	R	2xAcetyl:2H(3) [K4; K15]	O43175 2xAcetyl:2H(3) [K58; K69]	FALSE	0.00456432	0	1	1	1	O43175	O43175 [55-75]	0	2260.28	0	0.174	0.01	1.848	0.304431	3.7678e-17	0.612013	0		0	132.4	23		244.6		High	Peak Found	Not Found	Peak Found	High	0	4.993e-05	3.94	65.12
FALSE	High	[K].SAPATGGVKKPHR.[Y]	K	2xAcetyl:2H(3) [K9; K10]; 1xAcetyl:2H(3) [N-Term]	Q16695 2xAcetyl:2H(3) [K37; K38]; 1xAcetyl:2H(3) [N-Term]; P68431 2xAcetyl:2H(3) [K37; K38]; 1xAcetyl:2H(3) [N-Term]; Q71DI3 2xAcetyl:2H(3) [K37; K38]; 1xAcetyl:2H(3) [N-Term]	FALSE	0.0140997	0	1	3	1	P68431	Q16695 [29-41]; P68431 [29-41]; Q71DI3 [29-41]	0	1440.83	0	0.501	0.387	0.713	0.822809	0.632314	0.968919	0	0	0	153.8	77	59.6	109.6		High	Peak Found	Peak Found	Peak Found	High	0	0.0003403	3.23	23.37
FALSE	High	[K].SAPAPKKGSKKAVTKVQKKDGKKR.[K]	K	9xAcetyl:2H(3) [K6; K7; K10; K11; K15; K18; K19; K22; K23]; 1xAcetyl:2H(3) [N-Term]	Q5QNW6 9xAcetyl:2H(3) [K12; K13; K16; K17; K21; K24; K25; K28; K29]; 1xAcetyl:2H(3) [N-Term]	FALSE	0.00228853	0	1	1	6	Q5QNW6	Q5QNW6 [7-30]	0	3015.86	0	0.871	0.61	0.879	0.939454	0.99776	0.985609	0	0	0	119.1	103.7	72.6	104.7		Peak Found	High	High	Peak Found	High	0	5.452e-05	3.75	44.08
FALSE	High	[K].SAPAPKKGSKKAVTKAQKKDGKKR.[K]	K	9xAcetyl:2H(3) [K6; K7; K10; K11; K15; K18; K19; K22; K23]; 1xAcetyl:2H(3) [N-Term]	Q16778 9xAcetyl:2H(3) [K12; K13; K16; K17; K21; K24; K25; K28; K29]; 1xAcetyl:2H(3) [N-Term]; P58876 9xAcetyl:2H(3) [K12; K13; K16; K17; K21; K24; K25; K28; K29]; 1xAcetyl:2H(3) [N-Term]; Q93079 9xAcetyl:2H(3) [K12; K13; K16; K17; K21; K24; K25; K28; K29]; 1xAcetyl:2H(3) [N-Term]; O60814 9xAcetyl:2H(3) [K12; K13; K16; K17; K21; K24; K25; K28; K29]; 1xAcetyl:2H(3) [N-Term]; Q99880 9xAcetyl:2H(3) […	FALSE	2.83869e-05	0	6	10	32	P58876; O60814; Q99880; Q8N257; P23527; Q99877	Q16778 [7-30]; P58876 [7-30]; Q93079 [7-30]; O60814 [7-30]; Q99880 [7-30]; P62807 [7-30]; Q8N257 [7-30]; P06899 [7-30]; P23527 [7-30]; Q99877 [7-30]	0	2987.83	0	0.803	0.774	0.77	0.994056	0.963945	0.987815	0	0	0	119.5	96	92.5	92	Shared	High	High	High	High	High	0	2.135e-07	4.43	40.53
FALSE	High	[R].SANLVAATLGAILNR.[L]	R	1xAcetyl:2H(3) [N-Term]	P19367 1xAcetyl:2H(3) [N-Term]	FALSE	0.00210089	0	1	1	3	P19367	P19367 [382-396]	0	1528.89	0	0.167	0.01	0.888	0.214732	3.7678e-17	0.985609	0		0	194.6	32.5		172.9		Peak Found	High	Not Found	Peak Found	High	0	1.323e-05	3.92	89.33
FALSE	High	[M].SDVAIVKEGWLHKR.[G]	M	1xAcetyl [N-Term]; 2xAcetyl:2H(3) [K7; K13]	P31749 1xAcetyl [N-Term]; 2xAcetyl:2H(3) [K8; K14]	FALSE	0.00346733	0	1	1	1	P31749	P31749 [2-15]	0	1769.98	0	0.08	0.01	0.459	0.0363651	3.7678e-17	0.835967	0	0	0	258.1	20.8	2.6	118.6		High	Peak Found	Peak Found	Peak Found	High	0	3.104e-05	4.2	59.36
FALSE	High	[M].SAIPAEESDQLLIRPLGAGQEVGR.[S]	M	1xAcetyl [N-Term]	Q9UKF6 1xAcetyl [N-Term]	FALSE	0.0131074	0	1	1	4	Q9UKF6	Q9UKF6 [2-25]	0	2548.34	0	0.074	0.01	0.156	0.0172298	3.7678e-17	0.0817469	0		0	325.4	23.9		50.7		High	Peak Found	Not Found	High	High	0	0.0005134	2.65	55.18
FALSE	High	[A].SDVLELTDDNFESR.[I]	A	1xAcetyl:2H(3) [N-Term]	P30101 1xAcetyl:2H(3) [N-Term]	FALSE	0.00265	0	1	1	12	P30101	P30101 [25-38]	0	1684.77	0	0.11	0.026	0.161	0.000506335	1.64572e-10	0.00186876	0	0	0	308.5	33.9	7.9	49.7		High	Peak Found	High	High	High	0	1.978e-05	3.76	57.46
FALSE	High	[M].SDYSTGGPPPGPPPPAGGGGGAGGAGGGPPPGPPGAGDR.[G]	M	1xAcetyl [N-Term]	Q92945 1xAcetyl [N-Term]	FALSE	0.0159222	0	1	1	4	Q92945	Q92945 [2-40]	0	3246.48	0	0.045	0.015	0.101	0.000169712	2.75054e-07	0.00135211	0	0	0	344.3	15.7	5.2	34.8		High	Peak Found	Peak Found	Peak Found	High	0	0.0004179	2.87	33.35
FALSE	High	[Y].SEAVADREDDPNFFKMVEGFFDR.[G]	Y	1xAcetyl:2H(3) [K15]; 1xAcetyl:2H(3) [N-Term]	P00367 1xAcetyl:2H(3) [K68]; 1xAcetyl:2H(3) [N-Term]	FALSE	0.000408248	0	1	1	31	P00367	P00367 [54-76]	1	2811.28	0	0.551	0.666	0.442	0.755943	0.880112	0.434118	0	0	0	150.4	82.9	100.2	66.4		High	High	High	High	High	0	8.133e-07	6.13	85.09
FALSE	High	[R].SAKAGVIFPVGR.[M]	R	1xAcetyl:2H(3) [K3]; 1xAcetyl:2H(3) [N-Term]	O75367 1xAcetyl:2H(3) [K18]; 1xAcetyl:2H(3) [N-Term]	FALSE	0.0183087	0	1	1	8	O75367	O75367 [16-27]	0	1291.76	0	1.615	1.642	1.729	0.410271	0.398905	0.246862	0	0	0	66.8	107.9	109.7	115.5		High	High	High	High	High	0	0.0008928	3.28	50.61
FALSE	High	[R].SEAVVEYVFSGSR.[L]	R	1xAcetyl:2H(3) [N-Term]	Q7KZF4 1xAcetyl:2H(3) [N-Term]	FALSE	0.0173353	0	1	1	5	Q7KZF4	Q7KZF4 [527-539]	0	1474.73	0	0.202	0.01	0.575	0.4787	3.7678e-17	0.908866	0		0	225	45.5		129.5		High	Peak Found	Not Found	High	High	0	0.000485	2.43	66.08
FALSE	High	[R].SDSFENPVLQQHFR.[N]	R	1xAcetyl:2H(3) [N-Term]	P12956 1xAcetyl:2H(3) [N-Term]	FALSE	0.0013865	0	1	1	3	P12956	P12956 [475-488]	0	1748.84	0	0.554	0.19	0.806	0.760035	0.0141527	0.997764	0	0	0	156.8	86.9	29.8	126.4		Peak Found	High	High	High	High	0	6.524e-06	4.68	47.04
FALSE	High	[E].MVNPVALEPEREHLDENSPLGDLLR.[G]	E	1xAcetyl:2H(3) [N-Term]	P19174 1xAcetyl:2H(3) [N-Term]	FALSE	0.000694911	0	1	1	3	P19174	P19174 [849-873]	1	2888.47	0	100	100	100	4.34403e-17	3.7678e-17	4.94188e-17					123.4	162.8	113.8		Not Found	Peak Found	High	High	High	0	2.022e-06	4.83	64.54
FALSE	High	[V].PVPPLPEYGGKVR.[Y]	V	1xAcetyl:2H(3) [K11]; 1xAcetyl:2H(3) [N-Term]	P24539 1xAcetyl:2H(3) [K53]; 1xAcetyl:2H(3) [N-Term]	FALSE	0.0213066	0	1	1	14	P24539	P24539 [43-55]	0	1498.85	0	0.931	1.079	0.754	0.932796	0.928154	0.985609	0	0	0	106.3	99	114.7	80.1		High	High	High	High	High	0	0.0007247	2.12	49.4
FALSE	High	[M].SESSSKSSQPLASKQEKDGTEKR.[G]	M	1xAcetyl [N-Term]; 4xAcetyl:2H(3) [K6; K14; K17; K22]	P17096 1xAcetyl [N-Term]; 4xAcetyl:2H(3) [K7; K15; K18; K23]	FALSE	0.00815056	0	1	1	8	P17096	P17096 [2-24]	0	2716.37	0	0.335	0.238	0.923	0.799447	0.754326	0.966123	0	0	0	160.3	53.6	38.1	148		Peak Found	Peak Found	High	High	High	6.911e-05	0.001612	3.84	32.48
FALSE	High	[M].PKNKGKGGKNR.[R]	M	4xAcetyl:2H(3) [K2; K4; K6; K9]; 1xAcetyl:2H(3) [N-Term]	P47813 4xAcetyl:2H(3) [K3; K5; K7; K10]; 1xAcetyl:2H(3) [N-Term]; O14602 4xAcetyl:2H(3) [K3; K5; K7; K10]; 1xAcetyl:2H(3) [N-Term]	FALSE	0.00972649	0	1	2	89	O14602	P47813 [2-12]; O14602 [2-12]	0	1408.85	0	0.734	0.683	0.843	0.960927	0.903574	0.986143	0	0	0	122.7	90.1	83.9	103.4		High	High	High	High	High	0	0.0002868	4.7	21.97
FALSE	High	[V].PKDVNAAIATIKTKR.[TS]	V	3xAcetyl:2H(3) [K2; K12; K14]	Q13748 3xAcetyl:2H(3) [K326; K336; K338]; Q6PEY2 3xAcetyl:2H(3) [K326; K336; K338]; Q71U36 3xAcetyl:2H(3) [K326; K336; K338]; P68363 3xAcetyl:2H(3) [K326; K336; K338]; Q9BQE3 3xAcetyl:2H(3) [K326; K336; K338]	FALSE	3.53767e-05	0	2	5	3	Q13748; P68363	Q13748 [325-339]; Q6PEY2 [325-339]; Q71U36 [325-339]; P68363 [325-339]; Q9BQE3 [325-339]	0	1761.06	0	100	100	100	4.34403e-17	3.7678e-17	4.94188e-17					131.5	99.8	168.8	Shared	Not Found	High	Peak Found	Peak Found	High	0	2.827e-07	4.38	69.61
FALSE	High	[R].SGAPVLSLLSVR.[D]	R	1xAcetyl:2H(3) [N-Term]	Q9BRP4 1xAcetyl:2H(3) [N-Term]	FALSE	0.001686	0	1	1	9	Q9BRP4	Q9BRP4 [321-332]	0	1243.74	0	0.986	0.951	1.093	0.89185	0.957205	0.875993	0	0	0	99.2	97.8	94.4	108.5		High	Peak Found	High	High	High	0	9.165e-06	3.27	67.33
FALSE	High	[M].PHIDNDVKLDFKDVLLRPKR.[S]	M	3xAcetyl:2H(3) [K8; K12; K19]; 1xAcetyl:2H(3) [N-Term]	Q9P2T1 3xAcetyl:2H(3) [K9; K13; K20]; 1xAcetyl:2H(3) [N-Term]	FALSE	0.000173443	0	1	1	10	Q9P2T1	Q9P2T1 [2-21]	0	2598.48	0	0.558	1.022	0.897	0.766655	0.908672	0.963108	0	0	0	115.1	64.2	117.5	103.2		High	High	High	High	High	0	4.21e-05	4.1	66.7
FALSE	High	[M].PGVTVKDVNQQEFVR.[A]	M	1xAcetyl:2H(3) [K6]; 1xAcetyl:2H(3) [N-Term]	P39019 1xAcetyl:2H(3) [K7]; 1xAcetyl:2H(3) [N-Term]	FALSE	0.000937609	0	1	1	8	P39019	P39019 [2-16]	0	1805.97	0	0.386	0.641	0.446	0.337238	0.85567	0.446602	0	0	0	161.7	62.4	103.7	72.2		Peak Found	High	High	High	High	0	3.565e-06	5.02	47.92
FALSE	High	[D].PGSEETQTLVR.[E]	D			FALSE	0.0164132	0	1	1	2	P26641	P26641 [404-414]	0	1216.62	0	0.664	1.529	0.537	0.976309	0.729137	0.842488	0	0	0	107.2	71.2	164	57.6		High	Peak Found	High	Peak Found	High	0	0.0004392	4.11	20.41
FALSE	High	[M].PGSAAKGSELSER.[I]	M	1xAcetyl:2H(3) [K6]; 1xAcetyl:2H(3) [N-Term]	P49770 1xAcetyl:2H(3) [K7]; 1xAcetyl:2H(3) [N-Term]	FALSE	0.0186451	0	1	1	2	P49770	P49770 [2-14]	0	1378.71	0	0.45	0.627	0.108	0.85351	0.987102	0.0675384	0	0	0	183.2	82.3	114.8	19.7		High	High	Peak Found	Peak Found	High	0	0.0005503	3.64	29.2
FALSE	High	[M].PGGLLLGDVAPNFEANTTVGR.[I]	M	1xAcetyl:2H(3) [N-Term]	P30041 1xAcetyl:2H(3) [N-Term]	FALSE	1.48468e-05	0	1	1	25	P30041	P30041 [2-22]	0	2143.12	0	0.615	0.821	0.631	0.849179	0.99327	0.877822	0	0	0	130.4	80.2	107.1	82.3		High	High	High	High	High	0	3.3e-06	5.11	68.71
FALSE	High	[M].PFSNSHNALKLR.[F]	M	1xAcetyl:2H(3) [K10]; 1xAcetyl:2H(3) [N-Term]	P12277 1xAcetyl:2H(3) [K11]; 1xAcetyl:2H(3) [N-Term]	FALSE	0.0056865	0	1	1	4	P12277	P12277 [2-13]	0	1473.81	0	0.681	0.198	0.7	0.921257	0.0176892	0.942957	0	0	0	155.1	105.6	30.7	108.6		High	High	High	High	High	0	7.213e-05	4.92	45.21
FALSE	High	[M].PFLELDTNLPANRVPAGLEKR.[L]	M	1xAcetyl:2H(3) [K20]; 1xAcetyl:2H(3) [N-Term]	P30046 1xAcetyl:2H(3) [K21]; 1xAcetyl:2H(3) [N-Term]; A6NHG4 1xAcetyl:2H(3) [K21]; 1xAcetyl:2H(3) [N-Term]	FALSE	0.0135946	0	1	2	22	A6NHG4	P30046 [2-22]; A6NHG4 [2-22]	1	2440.35	0	0.448	1.028	0.496	0.744525	0.915311	0.737851	0	0	0	134.6	60.3	138.3	66.8		High	High	High	Peak Found	High	0	0.0003182	4.33	66.11
FALSE	High	[M].PFLELDTNLPANR.[V]	M	1xAcetyl:2H(3) [N-Term]	P30046 1xAcetyl:2H(3) [N-Term]; A6NHG4 1xAcetyl:2H(3) [N-Term]	FALSE	0.0057916	0	1	2	96	A6NHG4	P30046 [2-14]; A6NHG4 [2-14]	0	1544.81	0	0.646	0.732	0.655	0.8858	0.946606	0.90318	0	0	0	131.9	85.2	96.5	86.4		High	High	High	High	High	0.0007442	0.01302	3.77	67.78
FALSE	High	[M].PEPTKSAPAPKKGSKKAVTKAQKKDGKKR.[K]	M	10xAcetyl:2H(3) [K5; K11; K12; K15; K16; K20; K23; K24; K27; K28]; 1xAcetyl:2H(3) [N-Term]	P58876 10xAcetyl:2H(3) [K6; K12; K13; K16; K17; K21; K24; K25; K28; K29]; 1xAcetyl:2H(3) [N-Term]	FALSE	6.38512e-06	0	1	1	63	P58876	P58876 [2-30]	0	3585.15	2	0.847	0.884	0.811	0.985294	0.978842	0.99558	0	0	0	112.9	95.7	99.8	91.6		High	High	High	High	High	0	9.33e-07	4.84	42.88
FALSE	High	[M].PEPTKSAPAPKKGSKKAVTKAQKKDGKKR.[K]	M	1xAcetyl [N-Term]; 10xAcetyl:2H(3) [K5; K11; K12; K15; K16; K20; K23; K24; K27; K28]	P58876 1xAcetyl [N-Term]; 10xAcetyl:2H(3) [K6; K12; K13; K16; K17; K21; K24; K25; K28; K29]	FALSE	0.00615614	0	1	1	9	P58876	P58876 [2-30]	0	3582.13	0	0.69	0.562	0.696	0.98541	0.909344	0.965518	0	0	0	135.7	93.7	76.2	94.4		High	High	High	High	High	0	0.0004356	3.54	45.36
FALSE	High	[M].PEPTKSAPAPKKGSKKAVTKAQKKDGKKR.[K]	M	10xAcetyl:2H(3) [K5; K11; K12; K15; K16; K20; K23; K24; K27; K28]	P58876 10xAcetyl:2H(3) [K6; K12; K13; K16; K17; K21; K24; K25; K28; K29]	FALSE	0.0274763	0	1	1	6	P58876	P58876 [2-30]	0	3540.12	0	0.01	0.526	1.296	4.34403e-17	0.876771	0.71395		0	0	141.7		74.6	183.7		High	High	High	High	High	0	0.001062	3.38	42.58
FALSE	High	[M].PEPSKSAPAPKKGSKKAVTKAQKKDGKKR.[K]	M	10xAcetyl:2H(3) [K5; K11; K12; K15; K16; K20; K23; K24; K27; K28]; 1xAcetyl:2H(3) [N-Term]	Q99877 10xAcetyl:2H(3) [K6; K12; K13; K16; K17; K21; K24; K25; K28; K29]; 1xAcetyl:2H(3) [N-Term]	FALSE	0.000234033	0	1	1	31	Q99877	Q99877 [2-30]	0	3571.13	0	0.833	0.623	0.885	0.969919	0.951719	0.985609	0	0	0	119.7	99.8	74.6	106		High	High	High	High	High	0	0.0001025	4.18	42.68
FALSE	High	[M].PEPAKSAPAPKKGSKKAVTKAQKKDGKKR.[K]	M	10xAcetyl:2H(3) [K5; K11; K12; K15; K16; K20; K23; K24; K27; K28]; 1xAcetyl:2H(3) [N-Term]	Q16778 10xAcetyl:2H(3) [K6; K12; K13; K16; K17; K21; K24; K25; K28; K29]; 1xAcetyl:2H(3) [N-Term]; O60814 10xAcetyl:2H(3) [K6; K12; K13; K16; K17; K21; K24; K25; K28; K29]; 1xAcetyl:2H(3) [N-Term]; P62807 10xAcetyl:2H(3) [K6; K12; K13; K16; K17; K21; K24; K25; K28; K29]; 1xAcetyl:2H(3) [N-Term]; P06899 10xAcetyl:2H(3) [K6; K12; K13; K16; K17; K21; K24; K25; K28; K29]; 1xAcetyl:2H(3) [N-Term]	FALSE	1.75118e-05	0	1	4	191	O60814	Q16778 [2-30]; O60814 [2-30]; P62807 [2-30]; P06899 [2-30]	0	3555.14	0	0.858	1.026	0.798	0.979382	0.905407	0.99558	0	0	0	108.6	93.2	111.5	86.7		High	High	High	High	High	0	5.278e-08	4.6	42.72
FALSE	High	[M].PEPAKSAPAPKKGSKKAVTKAQKKDGKKR.[K]	M	1xAcetyl [N-Term]; 10xAcetyl:2H(3) [K5; K11; K12; K15; K16; K20; K23; K24; K27; K28]	Q16778 1xAcetyl [N-Term]; 10xAcetyl:2H(3) [K6; K12; K13; K16; K17; K21; K24; K25; K28; K29]; O60814 1xAcetyl [N-Term]; 10xAcetyl:2H(3) [K6; K12; K13; K16; K17; K21; K24; K25; K28; K29]; P62807 1xAcetyl [N-Term]; 10xAcetyl:2H(3) [K6; K12; K13; K16; K17; K21; K24; K25; K28; K29]; P06899 1xAcetyl [N-Term]; 10xAcetyl:2H(3) [K6; K12; K13; K16; K17; K21; K24; K25; K28; K29]	FALSE	4.09685e-05	0	1	4	22	O60814	Q16778 [2-30]; O60814 [2-30]; P62807 [2-30]; P06899 [2-30]	0	3552.12	0	0.264	0.461	0.819	0.492345	0.915473	0.987852	0	0	0	157.3	41.5	72.4	128.8		High	High	High	High	High	0	8.645e-08	5.76	39.65
FALSE	High	[M].PEPAKSAPAPKKGSKKAVTKAQKKDGKKR.[K]	M	10xAcetyl:2H(3) [K5; K11; K12; K15; K16; K20; K23; K24; K27; K28]	Q16778 10xAcetyl:2H(3) [K6; K12; K13; K16; K17; K21; K24; K25; K28; K29]; O60814 10xAcetyl:2H(3) [K6; K12; K13; K16; K17; K21; K24; K25; K28; K29]; P62807 10xAcetyl:2H(3) [K6; K12; K13; K16; K17; K21; K24; K25; K28; K29]; P06899 10xAcetyl:2H(3) [K6; K12; K13; K16; K17; K21; K24; K25; K28; K29]	FALSE	0.001686	0	1	4	3	O60814	Q16778 [2-30]; O60814 [2-30]; P62807 [2-30]; P06899 [2-30]	0	3510.11	0	1.168	0.267	0.213	0.805049	0.802528	0.238852	0	0	0	151.1	176.4	40.3	32.1		Peak Found	High	High	Peak Found	High	0	9.115e-06	4.05	39.17
FALSE	High	[M].PEPAKFAPAPKKGSKKAVTKAQKKDGKKR.[K]	M	1xAcetyl [N-Term]; 10xAcetyl:2H(3) [K5; K11; K12; K15; K16; K20; K23; K24; K27; K28]	Q6DN03 1xAcetyl [N-Term]; 10xAcetyl:2H(3) [K6; K12; K13; K16; K17; K21; K24; K25; K28; K29]; Q6DRA6 1xAcetyl [N-Term]; 10xAcetyl:2H(3) [K6; K12; K13; K16; K17; K21; K24; K25; K28; K29]	FALSE	0.00330195	0	1	2	2	Q6DN03	Q6DN03 [2-30]; Q6DRA6 [2-30]	0	3612.16	0	1.491	0.488	0.971	0.6538	0.946606	0.963814	0	0	0	101.2	151	49.4	98.3		Peak Found	High	Peak Found	High	High	0	0.0004903	3.65	45.48
FALSE	High	[C].PELIEAFLNSQKAGKEKDGTKR.[K]	C	4xAcetyl:2H(3) [K12; K15; K17; K21]; 1xAcetyl:2H(3) [N-Term]	Q13185 4xAcetyl:2H(3) [K81; K84; K86; K90]; 1xAcetyl:2H(3) [N-Term]	FALSE	0.00419024	0	1	1	1	Q13185	Q13185 [70-91]	0	2684.47	0	0.01	0.01	0.01	4.34403e-17	3.7678e-17	4.94188e-17				400					High	Not Found	Not Found	Not Found	High	0	4.294e-05	4.15	91.36
FALSE	High	[M].PELAVQKVVVHPLVLLSVVDHFNR.[I]	M	1xAcetyl:2H(3) [K7]; 1xAcetyl:2H(3) [N-Term]	P51665 1xAcetyl:2H(3) [K8]; 1xAcetyl:2H(3) [N-Term]	FALSE	5.56195e-05	0	1	1	1	P51665	P51665 [2-25]	0	2798.62	0	0.321	0.423	0.123	0.527793	0.782234	0.0162973	0	0	0	214.3	68.8	90.6	26.3		Peak Found	Peak Found	Peak Found	High	High	0	2.76e-08	5.96	88.05
FALSE	High	[M].PELAKSAPAPKKGSKKAVTKAQKKDGKKR.[K]	M	10xAcetyl:2H(3) [K5; K11; K12; K15; K16; K20; K23; K24; K27; K28]; 1xAcetyl:2H(3) [N-Term]	Q99880 10xAcetyl:2H(3) [K6; K12; K13; K16; K17; K21; K24; K25; K28; K29]; 1xAcetyl:2H(3) [N-Term]	FALSE	6.1336e-05	0	1	1	49	Q99880	Q99880 [2-30]	0	3571.17	4	0.649	0.787	0.74	0.888572	0.971657	0.970361	0	0	0	125.9	81.8	99.1	93.2		High	High	High	High	High	0	1.028e-07	4.36	49.16
FALSE	High	[M].PDPAKSAPAPKKGSKKAVTKVQKKDGKKR.[K]	M	10xAcetyl:2H(3) [K5; K11; K12; K15; K16; K20; K23; K24; K27; K28]; 1xAcetyl:2H(3) [N-Term]	Q5QNW6 10xAcetyl:2H(3) [K6; K12; K13; K16; K17; K21; K24; K25; K28; K29]; 1xAcetyl:2H(3) [N-Term]	FALSE	2.12965e-05	0	1	1	95	Q5QNW6	Q5QNW6 [2-30]	0	3569.16	0	0.892	0.974	0.858	0.964291	0.942748	0.985609	0	0	0	107.4	95.8	104.6	92.2		High	High	High	High	High	0	6.344e-07	4	46.5
FALSE	High	[M].PLAKDLLHPSPEEEKR.[K]	M	2xAcetyl:2H(3) [K4; K15]; 1xAcetyl:2H(3) [N-Term]	P42677 2xAcetyl:2H(3) [K5; K16]; 1xAcetyl:2H(3) [N-Term]	FALSE	8.74453e-05	0	1	1	18	P42677	P42677 [2-17]	0	1994.09	0	1.253	0.636	0.637	0.71388	0.846702	0.888677	0	0	0	113.4	142.1	72.1	72.3		High	High	High	High	High	0	3.083e-07	5.8	55.46
FALSE	High	[E].SGAPGVPSGNGAPGPKGEGERPAQNEKR.[K]	E	2xAcetyl:2H(3) [K16; K27]; 1xAcetyl:2H(3) [N-Term]	P52272 2xAcetyl:2H(3) [K37; K48]; 1xAcetyl:2H(3) [N-Term]	FALSE	0.00342523	0	1	1	9	P52272	P52272 [22-49]	0	2836.43	0	33.84	13.884	30.514	9.90327e-12	4.11503e-07	3.10749e-14	0	0	0	5	170.8	70.1	154		Peak Found	High	High	High	High	0.008206	0.0873	2.78	27.45
FALSE	High	[M].PLENLEEEGLPKNPDLR.[I]	M	1xAcetyl:2H(3) [K12]; 1xAcetyl:2H(3) [N-Term]	Q15008 1xAcetyl:2H(3) [K13]; 1xAcetyl:2H(3) [N-Term]	FALSE	0.000472772	0	1	1	4	Q15008	Q15008 [2-18]	0	2053.07	0	0.128	0.245	0.215	0.090947	0.482939	0.174669	0	0	0	252	32.3	61.7	54.1		High	Peak Found	Peak Found	Peak Found	High	0	9.63e-05	4.26	60.3
FALSE	High	[R].SGAPAAESKEIVR.[G]	R	1xAcetyl:2H(3) [K9]; 1xAcetyl:2H(3) [N-Term]	Q9NRX4 1xAcetyl:2H(3) [K41]; 1xAcetyl:2H(3) [N-Term]	FALSE	0.00387036	0	1	1	43	Q9NRX4	Q9NRX4 [33-45]	0	1404.76	0	0.746	0.686	0.828	0.989475	0.981674	0.987852	0	0	0	122.7	91.5	84.2	101.6		High	High	High	High	High	0	3.77e-05	3.02	33.31
FALSE	High	[M].PTTQQSPQDEQEKLLDEAIQAVKVQSFQMKR.[C]	M	3xAcetyl:2H(3) [K13; K23; K30]; 1xAcetyl:2H(3) [N-Term]	Q96QK1 3xAcetyl:2H(3) [K14; K24; K31]; 1xAcetyl:2H(3) [N-Term]	FALSE	0.00120466	0	1	1	4	Q96QK1	Q96QK1 [2-32]	0	3780.95	0	0.01	0.01	0.538	4.34403e-17	3.7678e-17	0.888954			0	260.2			139.8		High	Not Found	Not Found	High	High	0	5.146e-06	5.46	83.61
FALSE	High	[E].SESVDKVMDQKEHKLNGKVIDPKR.[A]	E	5xAcetyl:2H(3) [K6; K11; K14; K18; K23]; 1xAcetyl:2H(3) [N-Term]	Q14103 5xAcetyl:2H(3) [K153; K158; K161; K165; K170]; 1xAcetyl:2H(3) [N-Term]	FALSE	0.00476368	0	1	1	5	Q14103	Q14103 [148-171]	0	3050.65	0	100	100	100	4.34403e-17	3.7678e-17	4.94188e-17					82.7	152.5	164.8		Not Found	High	High	High	High	0.0002176	0.004917	4.07	58.49
FALSE	High	[D].PSTKDFLLQQTMLR.[V]	D	1xAcetyl:2H(3) [K4]	Q04760 1xAcetyl:2H(3) [K28]	FALSE	0.00153831	0	1	1	3	Q04760	Q04760 [25-38]	0	1722.93	0	0.899	1.67	1.123	0.943146	0.70044	0.892646	0	0	0	85.3	76.6	142.4	95.8		Peak Found	Peak Found	High	High	High	0	1.98e-05	5.47	54.91
FALSE	High	[M].SETAPAAPAAPAPAEKTPVKKKAR.[K]	M	1xAcetyl [N-Term]; 4xAcetyl:2H(3) [K16; K20; K21; K22]	P10412 1xAcetyl [N-Term]; 4xAcetyl:2H(3) [K17; K21; K22; K23]	FALSE	0.000481524	0	1	1	25	P10412	P10412 [2-25]	0	2609.47	0	0.758	0.912	0.662	0.970915	0.9635	0.909807	0	0	0	120.1	91	109.5	79.5		High	High	High	High	High	0	0.0007215	2.42	35.75
FALSE	High	[R].SEVELAAALSDKR.[G]	R	1xAcetyl:2H(3) [K12]; 1xAcetyl:2H(3) [N-Term]	Q03252 1xAcetyl:2H(3) [K170]; 1xAcetyl:2H(3) [N-Term]	FALSE	0.0202978	0	1	1	4	Q03252	Q03252 [159-171]	0	1478.8	0	0.299	0.023	0.616	0.281159	1.73049e-05	0.880766	0	0	0	206.3	61.8	4.7	127.1		High	High	Peak Found	High	High	0.0001879	0.002706	3.36	55.87
FALSE	High	[DE].PSKSAPAPKKGSKKAVTKAQKKDGKKR.[K]	D	10xAcetyl:2H(3) [K3; K9; K10; K13; K14; K18; K21; K22; K25; K26]	Q8N257 10xAcetyl:2H(3) [K6; K12; K13; K16; K17; K21; K24; K25; K28; K29]; Q99877 10xAcetyl:2H(3) [K6; K12; K13; K16; K17; K21; K24; K25; K28; K29]	FALSE	9.6181e-06	0	2	2	18	Q8N257; Q99877	Q8N257 [4-30]; Q99877 [4-30]	0	3300.01	0														No Quan Values	High	High	High	High	High	0	1.711e-08	6.46	38.05
FALSE	High	[D].PSKLDSGKELKIDIIPNPQER.[T]	D	3xAcetyl:2H(3) [K3; K8; K11]	P08238 3xAcetyl:2H(3) [K64; K69; K72]; Q58FF7 3xAcetyl:2H(3) [K64; K69; K72]	FALSE	0.000487448	0	1	2	7	P08238	P08238 [62-82]; Q58FF7 [62-82]	0	2512.4	0	0.01	0.01	1.132	4.34403e-17	3.7678e-17	0.903507			0	187.6			212.4		Peak Found	Not Found	Not Found	High	High	0	1.248e-05	5.18	57.69
FALSE	High	[M].PSKGPLQSVQVFGR.[K]	M	1xAcetyl:2H(3) [K3]; 1xAcetyl:2H(3) [N-Term]	P62249 1xAcetyl:2H(3) [K4]; 1xAcetyl:2H(3) [N-Term]	FALSE	0.00114018	0	1	1	78	P62249	P62249 [2-15]	0	1589.89	0	0.794	0.772	0.724	0.989475	0.9635	0.963108	0	0	0	121.6	96.6	93.9	88		High	High	High	High	High	0	0.0002201	4.54	55.31
FALSE	High	[M].PSETPQAEVGPTGCPHR.[S]	M	1xCarbamidomethyl [C14]; 1xAcetyl:2H(3) [N-Term]	P0DN79 1xCarbamidomethyl [C15]; 1xAcetyl:2H(3) [N-Term]	FALSE	0.000618703	0	1	1	8	P0DN79	P0DN79 [2-18]	0	1864.87	0	0.01	0.01	0.066	4.34403e-17	3.7678e-17	0.00553524			0	375.1			24.9		High	Not Found	Not Found	Peak Found	High	0	7.522e-06	4.58	25.85
FALSE	High	[M].PQYQTWEEFSR.[A]	M	1xAcetyl:2H(3) [N-Term]	P49458 1xAcetyl:2H(3) [N-Term]	FALSE	0.0180878	0	1	1	51	P49458	P49458 [2-12]	0	1515.69	0	0.783	0.692	0.789	0.996243	0.938657	0.994778	0	0	0	122.5	95.9	84.8	96.7		High	High	High	High	High	0	0.001248	3.81	53.96
FALSE	High	[M].PPYTVVYFPVR.[G]	M	1xAcetyl:2H(3) [N-Term]	P09211 1xAcetyl:2H(3) [N-Term]	FALSE	0.0187586	0	1	1	27	P09211	P09211 [2-12]	0	1382.75	0	2.094	1.709	1.669	0.177888	0.357862	0.282489	0	0	0	61.8	129.4	105.6	103.1		High	High	High	High	High	0.0001879	0.00337	2.91	63.12
FALSE	High	[D].PVNKSGGKAKKKKWSKGKVR.[D]	D	8xAcetyl:2H(3) [K4; K8; K10; K11; K12; K13; K16; K18]	P62851 8xAcetyl:2H(3) [K25; K29; K31; K32; K33; K34; K37; K39]	FALSE	0.000669882	0	1	1	5	P62851	P62851 [22-41]	0	2571.59	0	0.645	0.804	1.102	0.930218	0.99776	0.807223	0	0	0	112.6	72.6	90.5	124.2		High	High	Peak Found	High	High	0	4.309e-05	4.76	40.84
FALSE	High	[E].SFEITDVKPLKGDHLSR.[A]	E	2xAcetyl:2H(3) [K8; K11]; 1xAcetyl:2H(3) [N-Term]	Q9NRX1 2xAcetyl:2H(3) [K169; K172]; 1xAcetyl:2H(3) [N-Term]	FALSE	0.000607458	0	1	1	1	Q9NRX1	Q9NRX1 [162-178]	0	2077.13	0	100	100		4.34403e-17	3.7678e-17						303.9	96.1			Not Found	High	Peak Found	Not Found	High	0	1.599e-06	4.97	54.75
FALSE	High	[A].PPAEKAPVKKKAAKKAGGTPR.[K]	A	6xAcetyl:2H(3) [K5; K9; K10; K11; K14; K15]	P16403 6xAcetyl:2H(3) [K17; K21; K22; K23; K26; K27]	FALSE	0.000645755	0	1	1	1	P16403	P16403 [13-33]	0	2400.46	0	1.626	2.331	0.687	0.402206	0.124334	0.956839	0	0	0	70.9	115.2	165.2	48.7		Peak Found	Peak Found	Peak Found	High	High	0	1.787e-06	3.02	44.02
FALSE	High	[M].PNSEPASLLELFNSIATQGELVR.[S]	M	1xAcetyl:2H(3) [N-Term]	P23381 1xAcetyl:2H(3) [N-Term]	FALSE	0.00167572	0	1	1	6	P23381	P23381 [2-24]	0	2530.32	0	0.081	0.071	0.594	0.00587767	0.01553	0.874868	0	0	0	229.1	18.5	16.2	136.2		High	Peak Found	Peak Found	High	High	0	6.246e-05	3.57	92.06
FALSE	High	[M].PNFSGNWKIIR.[S]	M	1xAcetyl:2H(3) [K8]; 1xAcetyl:2H(3) [N-Term]	P29373 1xAcetyl:2H(3) [K9]; 1xAcetyl:2H(3) [N-Term]	FALSE	0.0177614	0	1	1	24	P29373	P29373 [2-12]	0	1421.78	0	0.744	0.958	0.931	0.98632	0.94872	0.956839	0	0	0	110.1	81.9	105.5	102.5		High	High	High	High	High	0	0.000503	3.74	60.62
FALSE	High	[M].SFLKSFPPPGPAEGLLR.[Q]	M	1xAcetyl [N-Term]; 1xAcetyl:2H(3) [K4]	P54105 1xAcetyl [N-Term]; 1xAcetyl:2H(3) [K5]	FALSE	0.00306853	0	1	1	23	P54105	P54105 [2-18]	0	1900.04	0	1.252	1.63	1.502	0.743559	0.511939	0.548015	0	0	0	74.3	93	121.1	111.6		High	High	High	High	High	0	7.998e-05	3.69	71.3
FALSE	High	[R].SFMALSQDIQKTIKKTAR.[R]	R	3xAcetyl:2H(3) [K11; K14; K15]; 1xAcetyl:2H(3) [N-Term]	Q14444 3xAcetyl:2H(3) [K125; K128; K129]; 1xAcetyl:2H(3) [N-Term]	FALSE	0.000384034	0	1	1	4	Q14444	Q14444 [115-132]	0	2246.26	0	0.514	0.627	0.407	0.915733	0.980439	0.768141	0	0	0	157	80.7	98.4	63.9		High	Peak Found	High	Peak Found	High	0	2.811e-05	4.51	84.93
FALSE	High	[R].SFPDFPTPGVVFR.[D]	R	1xAcetyl:2H(3) [N-Term]	P07741 1xAcetyl:2H(3) [N-Term]	FALSE	0.0104006	0	1	1	20	P07741	P07741 [15-27]	0	1510.78	0	0.708	0.793	0.876	0.982828	0.99998	0.970361	0	0	0	118.5	83.8	93.9	103.8		High	High	High	High	High	0.0001879	0.003261	2.26	66.89
FALSE	High	[C].SGAIIVLTKSGR.[S]	C	1xAcetyl:2H(3) [K9]; 1xAcetyl:2H(3) [N-Term]	P14618 1xAcetyl:2H(3) [K433]; 1xAcetyl:2H(3) [N-Term]	FALSE	0.0268196	0	1	1	10	P14618	P14618 [425-436]	0	1291.79	0	0.536	0.025	0.841	0.935955	0.049485	0.991092	0	0	0	166.6	89.2	4.2	140		High	High	Peak Found	High	High	0	0.001228	2.79	54.03
FALSE	High	[E].PMGEKPVGSLAGIGEVLGKKLEER.[G]	E	3xAcetyl:2H(3) [K5; K19; K20]	O75531 3xAcetyl:2H(3) [K18; K32; K33]	FALSE	0.000537542	0	1	1	1	O75531	O75531 [14-37]	0	2629.46	0	0.01	0.355	0.465	4.34403e-17	0.868744	0.807223		0	0	219.9		78	102.1		High	Not Found	Peak Found	Peak Found	High	0	1.299e-06	4.68	86.36
FALSE	High	[M].PMFIVNTNVPR.[A]	M	1xOxidation [M2]; 1xAcetyl:2H(3) [N-Term]	P14174 1xOxidation [M3]; 1xAcetyl:2H(3) [N-Term]	FALSE	0.0216976	0	1	1	33	P14174	P14174 [2-12]	0	1348.71	0	0.584	0.53	0.482	0.803089	0.642056	0.554932	0	0	0	154.1	90	81.7	74.3		High	High	High	High	High	0	0.000709	3.4	53.89
FALSE	High	[M].PMFIVNTNVPR.[A]	M	1xAcetyl:2H(3) [N-Term]	P14174 1xAcetyl:2H(3) [N-Term]	FALSE	0.0163138	0	1	1	86	P14174	P14174 [2-12]	0	1332.72	0	1.391	1.036	0.905	0.585043	0.89927	0.956839	0	0	0	92.4	128.4	95.6	83.6		High	High	High	High	High	0.00849	0.08968	3.67	63.96
FALSE	High	[K].PLVIIAEDVDGEALSTLVLNR.[L]	K			FALSE	0.00187058	0	1	1	3	P10809	P10809 [270-290]	0	2237.24	0	0.01	0.01	1.201	4.34403e-17	3.7678e-17	0.875891			0	181.8			218.2		Peak Found	Not Found	Not Found	High	High	0	1.088e-05	3.5	102.17
FALSE	High	[R].SFLAKKLQLVR.[R]	R	2xAcetyl:2H(3) [K5; K6]; 1xAcetyl:2H(3) [N-Term]	Q00587 2xAcetyl:2H(3) [K84; K85]; 1xAcetyl:2H(3) [N-Term]	FALSE	0.0291882	0	1	1	1	Q00587	Q00587 [80-90]	0	1437.91	0	1.403	0.01	1.806	0.71388	3.7678e-17	0.620385	0		0	95.1	133.3		171.6		Peak Found	High	Not Found	Peak Found	High	0	0.001187	2.62	75.26
FALSE	High	[R].IPKVQKLLQDFFNGR.[D]	R	2xAcetyl:2H(3) [K3; K6]; 1xAcetyl:2H(3) [N-Term]	P0DMV9 2xAcetyl:2H(3) [K345; K348]; 1xAcetyl:2H(3) [N-Term]	FALSE	0.002374	0	1	1	7	P0DMV9	P0DMV9 [343-357]	0	1938.12	0	1.13	0.803	1.57	0.849179	0.969912	0.719663	0	0	0	88.8	100.4	71.3	139.5		High	Peak Found	High	High	High	0	0.0002445	3.89	102.43
FALSE	High	[-].MVNPTVFFDIAVDGEPLGR.[V]	-	1xAcetyl [N-Term]	P62937 1xAcetyl [N-Term]	FALSE	0.000130919	0	1	1	67	P62937	P62937 [1-19]	0	2119.05	0	0.856	0.974	1.163	0.980453	0.942748	0.744654	0	0	0	100.2	85.7	97.6	116.5		High	High	High	High	High	0	0.0001603	4.64	86.3
FALSE	High	[-].MVLLTMIAR.[V]	-	1xAcetyl:2H(3) [N-Term]	O75396 1xAcetyl:2H(3) [N-Term]	FALSE	0.0200531	0	1	1	23	O75396	O75396 [1-9]	0	1092.63	0	0.882	1.084	0.762	0.935955	0.914777	0.994778	0	0	0	107.3	94.6	116.3	81.8		High	High	High	High	High	0	0.0006213	3.41	88.49
FALSE	High	[R].SIFQHIQSAQSQR.[S]	R	1xAcetyl:2H(3) [N-Term]	Q9Y2W1 1xAcetyl:2H(3) [N-Term]	FALSE	0.00299445	0	1	1	2	Q9Y2W1	Q9Y2W1 [609-621]	0	1574.81	0	0.384	0.146	0.576	0.7755	0.443516	0.916319	0	0	0	189.9	72.8	27.7	109.5		Peak Found	Peak Found	High	Peak Found	High	0	2.415e-05	4.82	44.14
FALSE	High	[-].MDLSGVKKKSLLGVKENNKKSSTR.[A]	-	1xAcetyl [N-Term]; 6xAcetyl:2H(3) [K7; K8; K9; K15; K19; K20]	Q15287 1xAcetyl [N-Term]; 6xAcetyl:2H(3) [K7; K8; K9; K15; K19; K20]	FALSE	2.70318e-05	0	1	1	2	Q15287	Q15287 [1-24]	0	2959.68	0	0.478	0.01	1.8	0.886861	3.7678e-17	0.617327	0		0	122.1	58.3		219.7		Peak Found	High	Not Found	High	High	0	8.048e-09	5.61	64.89
FALSE	High	[-].MDIRPNHTIYINNMNDKIKKEELKR.[S]	-	1xAcetyl [N-Term]; 4xAcetyl:2H(3) [K17; K19; K20; K24]	P08579 1xAcetyl [N-Term]; 4xAcetyl:2H(3) [K17; K19; K20; K24]	FALSE	2.01036e-06	0	1	1	5	P08579	P08579 [1-25]	0	3335.76	0	0.716	0.886	0.752	0.946955	0.976288	0.985609	0	0	0	119.3	85.3	105.7	89.7		High	Peak Found	High	High	High	0	9.722e-11	6.76	52.89
FALSE	High	[-].MDLFGDLPEPER.[S]	-	1xAcetyl [N-Term]	Q9H0C8 1xAcetyl [N-Term]	FALSE	0.0150748	0	1	1	2	Q9H0C8	Q9H0C8 [1-12]	0	1460.67	0	0.274	0.408	0.426	0.523042	0.903574	0.794635	0	0	0	189.7	52	77.5	80.8		High	Peak Found	Peak Found	Peak Found	High	0	0.0003805	2.95	67.42
FALSE	High	[T].MDKSELVQKAKLAEQAERYDDMAAAMKAVTEQGHELSNEER.[N]	T	1xAcetyl [N-Term]; 4xAcetyl:2H(3) [K3; K9; K11; K27]	P31946 1xAcetyl [N-Term]; 4xAcetyl:2H(3) [K5; K11; K13; K29]	FALSE	0.000346121	0	1	1	1	P31946	P31946 [3-43]	1	4872.35	0	0.01	0.807	0.01	4.34403e-17	0.973305	4.94188e-17		0		221.4		178.6			High	Not Found	Peak Found	Not Found	High	0	6.192e-07	4.18	71.69
FALSE	High	[T].MDKSELVQKAKLAEQAER.[Y]	T	1xAcetyl [N-Term]; 3xAcetyl:2H(3) [K3; K9; K11]	P31946 1xAcetyl [N-Term]; 3xAcetyl:2H(3) [K5; K11; K13]	FALSE	5.96978e-06	0	1	1	19	P31946	P31946 [3-20]	0	2251.19	0	0.728	0.925	0.608	0.957078	0.959081	0.844778	0	0	0	122.7	89.3	113.4	74.6		High	High	High	High	High	0	6.151e-09	6.57	62.12
FALSE	High	[-].MDKNELVQKAKLAEQAER.[Y]	-	1xAcetyl [N-Term]; 3xAcetyl:2H(3) [K3; K9; K11]	P63104 1xAcetyl [N-Term]; 3xAcetyl:2H(3) [K3; K9; K11]	FALSE	1.02873e-05	0	1	1	42	P63104	P63104 [1-18]	0	2278.21	0	0.788	1.068	0.877	0.986288	0.87666	0.966474	0	0	0	107.1	84.5	114.4	94		High	High	High	High	High	0	8.021e-08	6.3	61.68
FALSE	High	[R].SIGAAAKSQVISNAKNTVQGFKR.[F]	R	3xAcetyl:2H(3) [K7; K15; K22]; 1xAcetyl:2H(3) [N-Term]	P34932 3xAcetyl:2H(3) [K53; K61; K68]; 1xAcetyl:2H(3) [N-Term]	FALSE	5.04805e-07	0	1	1	36	P34932	P34932 [47-69]	0	2555.43	0	0.876	0.702	1.079	0.971942	0.923209	0.831269	0	0	0	109.4	95.8	76.8	118		High	High	High	High	High	0	2.875e-10	6.77	69.56
FALSE	High	[-].MDKLKKVLSGQDTEDR.[S]	-	1xAcetyl [N-Term]; 3xAcetyl:2H(3) [K3; K5; K6]	O95562 1xAcetyl [N-Term]; 3xAcetyl:2H(3) [K3; K5; K6]	FALSE	0.000464179	0	1	1	4	O95562	O95562 [1-16]	0	2040.06	0	0.213	0.261	0.46	0.372677	0.75087	0.807225	0	0	0	206.7	44.1	54	95.2		High	Peak Found	Peak Found	Peak Found	High	0	5.728e-06	4.24	71.84
FALSE	High	[E].MDGMSTKKNVFIIGATNRPDIIDPAILRPGR.[L]	E	2xAcetyl:2H(3) [K7; K8]; 1xAcetyl:2H(3) [N-Term]	P55072 2xAcetyl:2H(3) [K614; K615]; 1xAcetyl:2H(3) [N-Term]	FALSE	0.00271557	0	1	1	10	P55072	P55072 [608-638]	0	3531.91	0	100	100	100	4.34403e-17	3.7678e-17	4.94188e-17					169.3	133.4	97.3		Not Found	High	High	High	High	0	0.0001532	3.65	66.77
FALSE	High	[-].MDGIVPDIAVGTKR.[G]	-	1xAcetyl [N-Term]; 1xAcetyl:2H(3) [K13]	P26599 1xAcetyl [N-Term]; 1xAcetyl:2H(3) [K13]	FALSE	0.00231667	0	1	1	24	P26599	P26599 [1-14]	0	1558.83	0	1.047	0.35	1.166	0.87306	0.214895	0.739825	0	0	0	112.3	117.5	39.3	130.9		High	High	High	High	High	0	0.0006421	3.05	60.21
FALSE	High	[H].SLGGGTGSGMGTLLLSKIR.[E]	H	1xAcetyl:2H(3) [K17]; 1xAcetyl:2H(3) [N-Term]	Q13885 1xAcetyl:2H(3) [K154]; 1xAcetyl:2H(3) [N-Term]; P04350 1xAcetyl:2H(3) [K154]; 1xAcetyl:2H(3) [N-Term]; A6NNZ2 1xAcetyl:2H(3) [K154]; 1xAcetyl:2H(3) [N-Term]; Q9BUF5 1xAcetyl:2H(3) [K154]; 1xAcetyl:2H(3) [N-Term]; Q3ZCM7 1xAcetyl:2H(3) [K154]; 1xAcetyl:2H(3) [N-Term]; P07437 1xAcetyl:2H(3) [K154]; 1xAcetyl:2H(3) [N-Term]; P68371 1xAcetyl:2H(3) [K154]; 1xAcetyl:2H(3) [N-Term]; Q9BVA1 1xAcety…	FALSE	2.34854e-05	0	3	8	4	Q9BUF5; Q3ZCM7; P07437	Q13885 [138-156]; P04350 [138-156]; A6NNZ2 [138-156]; Q9BUF5 [138-156]; Q3ZCM7 [138-156]; P07437 [138-156]; P68371 [138-156]; Q9BVA1 [138-156]	0	1895.05	0	1.764	1.831	1.487	0.445578	0.596814	0.605965	0	0	0	65.8	116	120.4	97.8	Shared	Peak Found	Peak Found	High	High	High	0	6.343e-09	4.88	66.04
FALSE	High	[S].MDGAGAEEVLAPLR.[L]	S	1xAcetyl [N-Term]	P41250 1xAcetyl [N-Term]	FALSE	0.00113323	0	1	1	8	P41250	P41250 [55-68]	0	1470.73	0	0.427	0.455	0.509	0.641937	0.688425	0.737851	0	0	0	167.3	71.4	76	85.2		High	High	High	High	High	0	9.405e-06	2.99	57.55
FALSE	High	[-].MDFQHRPGGKTGSGGVASSSESNR.[D]	-	1xAcetyl [N-Term]; 1xAcetyl:2H(3) [K10]	Q15428 1xAcetyl [N-Term]; 1xAcetyl:2H(3) [K10]	FALSE	0.00334254	0	1	1	6	Q15428	Q15428 [1-24]	0	2536.17	0	0.01	0.01	0.01	4.34403e-17	3.7678e-17	4.94188e-17				400					High	Not Found	Not Found	Not Found	High	0	2.909e-05	3.33	28.24
FALSE	High	[I].MDFNVKKLAADAGTFLSR.[A]	I	1xAcetyl [N-Term]; 2xAcetyl:2H(3) [K6; K7]	Q9Y371 1xAcetyl [N-Term]; 2xAcetyl:2H(3) [K9; K10]	FALSE	3.53767e-05	0	1	1	7	Q9Y371	Q9Y371 [4-21]	0	2116.1	0	0.338	0.721	0.472	0.689854	0.992921	0.852769	0	0	0	158	53.5	114	74.5		High	Peak Found	Peak Found	Peak Found	High	0	1.669e-07	5.08	89.11
FALSE	High	[-].MDFNMKKLASDAGIFFTR.[A]	-	1xAcetyl [N-Term]; 2xAcetyl:2H(3) [K6; K7]	Q9NR46 1xAcetyl [N-Term]; 2xAcetyl:2H(3) [K6; K7]	FALSE	0.000487448	0	1	1	6	Q9NR46	Q9NR46 [1-18]	0	2224.1	0	0.992	1.031	0.961	0.895407	0.939874	0.963108	0	0	0	100.4	99.6	103.5	96.5		High	Peak Found	Peak Found	High	High	0	1.62e-05	4.42	90.31
FALSE	High	[E].MDECEQALAAEPKAKDPFAHLPKSTFVLDEFKR.[K]	E	1xCarbamidomethyl [C4]; 4xAcetyl:2H(3) [K13; K15; K23; K32]; 1xAcetyl:2H(3) [N-Term]	P26641 1xCarbamidomethyl [C266]; 4xAcetyl:2H(3) [K275; K277; K285; K294]; 1xAcetyl:2H(3) [N-Term]	FALSE	7.10311e-05	0	1	1	9	P26641	P26641 [263-295]	0	4044.04	0	100	100	100	4.34403e-17	3.7678e-17	4.94188e-17					168.6	137.1	94.3		Not Found	High	High	High	High	0	8.722e-07	4.51	72.58
FALSE	High	[-].MDDREDLVYQAKLAEQAER.[Y]	-	1xAcetyl [N-Term]; 1xAcetyl:2H(3) [K12]	P62258 1xAcetyl [N-Term]; 1xAcetyl:2H(3) [K12]	FALSE	0.00377693	0	1	1	26	P62258	P62258 [1-19]	1	2367.13	0	0.771	0.83	0.568	0.977205	0.99776	0.768141	0	0	0	126.2	97.3	104.8	71.7		High	High	High	High	High	0	3.584e-05	6.09	51.23
FALSE	High	[-].MDAIKKKMQMLKLDKENAIDRAEQAEADKKQAEDR.[C]	-	1xAcetyl [N-Term]; 7xAcetyl:2H(3) [K5; K6; K7; K12; K15; K29; K30]	P07951 1xAcetyl [N-Term]; 7xAcetyl:2H(3) [K5; K6; K7; K12; K15; K29; K30]	FALSE	0.000694911	0	1	1	2	P07951	P07951 [1-35]	1	4446.31	0	0.01	0.01	0.01	4.34403e-17	3.7678e-17	4.94188e-17				400					High	Not Found	Not Found	Not Found	High	0	2.026e-06	6.25	89.31
FALSE	High	[E].MATSGQQNNIGMVVIR.[G]	E	1xAcetyl:2H(3) [N-Term]	P62308 1xAcetyl:2H(3) [N-Term]	FALSE	0.00434665	0	1	1	1	P62308	P62308 [48-63]	0	1763.9	0	100	100		4.34403e-17	3.7678e-17						278.2	121.8			Not Found	High	Peak Found	Not Found	High	0	4.593e-05	3.31	50.26
FALSE	High	[E].MATAASSSSLEKSYELPDGQVITIGNER.[F]	E	1xAcetyl:2H(3) [K12]; 1xAcetyl:2H(3) [N-Term]	P63267 1xAcetyl:2H(3) [K239]; 1xAcetyl:2H(3) [N-Term]; P60709 1xAcetyl:2H(3) [K238]; 1xAcetyl:2H(3) [N-Term]; Q6S8J3 1xAcetyl:2H(3) [K938]; 1xAcetyl:2H(3) [N-Term]; P62736 1xAcetyl:2H(3) [K240]; 1xAcetyl:2H(3) [N-Term]; P68133 1xAcetyl:2H(3) [K240]; 1xAcetyl:2H(3) [N-Term]; P68032 1xAcetyl:2H(3) [K240]; 1xAcetyl:2H(3) [N-Term]; P63261 1xAcetyl:2H(3) [K238]; 1xAcetyl:2H(3) [N-Term]	FALSE	0.000239827	0	3	7	61	P60709; Q6S8J3; P63261	P63267 [228-255]; P60709 [227-254]; Q6S8J3 [927-954]; P62736 [229-256]; P68133 [229-256]; P68032 [229-256]; P63261 [227-254]	0	3044.5	0	7.864	15.363	12.873	6.60942e-05	1.43908e-07	1.18045e-08	0	0	0	10.8	84.8	165.6	138.8	Shared	Peak Found	High	High	High	High	0	8.931e-07	4.77	62.66
FALSE	High	[H].SIGKIGGAQNR.[S]	H	1xAcetyl:2H(3) [K4]; 1xAcetyl:2H(3) [N-Term]	P14174 1xAcetyl:2H(3) [K67]; 1xAcetyl:2H(3) [N-Term]	FALSE	0.0231931	0	1	1	23	P14174	P14174 [64-74]	0	1190.68	0	0.821	0.757	0.943	0.996243	0.95794	0.929844	0	0	0	113.6	93.3	86	107.1		High	High	High	High	High	6.911e-05	0.0014	4.14	32.9
FALSE	High	[E].MAFFVGPGNR.[L]	E	1xAcetyl:2H(3) [N-Term]	P16930 1xAcetyl:2H(3) [N-Term]	FALSE	0.0117475	0	1	1	26	P16930	P16930 [202-211]	0	1140.57	0	68.772	48.364	32.221	6.42477e-08	0.00546564	4.49209e-05	0	0	0	2.7	183	128.7	85.7		Peak Found	High	High	High	High	0.0002176	0.005937	3.92	61.91
FALSE	High	[-].MDNLSSEEIQQR.[A]	-	1xAcetyl [N-Term]	O00161 1xAcetyl [N-Term]	FALSE	0.0135121	0	1	1	3	O00161	O00161 [1-12]	0	1491.67	0	0.01	0.01	0.414	4.34403e-17	3.7678e-17	0.719663			0	282.9			117.1		High	Not Found	Not Found	Peak Found	High	0.0002176	0.004087	1.55	38.06
FALSE	High	[E].MAAAFLNENLPESIFGAPKAGNGQWASVIR.[V]	E	1xAcetyl:2H(3) [K19]; 1xAcetyl:2H(3) [N-Term]	Q15393 1xAcetyl:2H(3) [K856]; 1xAcetyl:2H(3) [N-Term]	FALSE	0.027643	0	1	1	11	Q15393	Q15393 [838-867]	0	3249.66	0	27.888	31.393	37.221	5.02324e-05	0.00529118	2.13644e-07	0	0	0	4.1	114.4	128.8	152.7		Peak Found	High	High	High	High	0.0001346	0.00249	4.38	85.11
FALSE	High	[-].MDQVMQFVEPSR.[Q]	-	1xAcetyl [N-Term]	P60059 1xAcetyl [N-Term]	FALSE	0.0065836	0	1	1	21	P60059	P60059 [1-12]	0	1508.69	0	0.676	0.712	0.858	0.917653	0.935887	0.985609	0	0	0	123.2	83.3	87.7	105.7		High	High	High	Peak Found	High	0.0001879	0.00352	2.58	65.34
FALSE	High	[-].MDTGVIEGGLNVTLTIR.[L]	-	1xAcetyl [N-Term]	Q15366 1xAcetyl [N-Term]	FALSE	0.0143593	0	1	1	1	Q15366	Q15366 [1-17]	0	1830.96	0														No Quan Values	High	Not Found	Not Found	Not Found	High	0	0.0003501	2.94
FALSE	High	[-].MELITILEKTVSPDRL.[E]	-	1xAcetyl [N-Term]; 1xAcetyl:2H(3) [K9]	Q14974 1xAcetyl [N-Term]; 1xAcetyl:2H(3) [K9]	FALSE	0.0113262	0	1	1	3	Q14974	Q14974 [1-16]	1	1945.08	0	0.433	0.01	1.184	0.87306	3.7678e-17	0.886663	0		0	152.9	66.1		181		High	High	Not Found	High	High	0.0002176	0.006995	2.86	102.45
FALSE	High	[R].SKYHPDEVGKR.[R]	R	2xAcetyl:2H(3) [K2; K10]; 1xAcetyl:2H(3) [N-Term]	Q9BXP5 2xAcetyl:2H(3) [K200; K208]; 1xAcetyl:2H(3) [N-Term]	FALSE	0.0274763	0	1	1	1	Q9BXP5	Q9BXP5 [199-209]	0	1450.76	0	0.403	0.201	0.584	0.79029	0.623012	0.909807	0	0	0	182.8	73.7	36.8	106.7		Peak Found	Peak Found	Peak Found	High	High	0	0.001069	3.54	25.35
FALSE	High	[E].MEKVLAGETLSVNDPPDVLDR.[Q]	E	1xAcetyl:2H(3) [K3]; 1xAcetyl:2H(3) [N-Term]	Q12906 1xAcetyl:2H(3) [K182]; 1xAcetyl:2H(3) [N-Term]	FALSE	5.84079e-05	0	1	1	13	Q12906	Q12906 [180-200]	0	2388.22	0	100	100	100	4.34403e-17	3.7678e-17	4.94188e-17					121.6	155.8	122.6		Not Found	High	High	High	High	0	2.979e-08	3.72	67.8
FALSE	High	[-].MEKTLETVPLER.[K]	-	1xAcetyl [N-Term]; 1xAcetyl:2H(3) [K3]	P22626 1xAcetyl [N-Term]; 1xAcetyl:2H(3) [K3]	FALSE	0.0107222	0	1	1	42	P22626	P22626 [1-12]	0	1532.81	0	0.213	0.378	0.296	0.0313491	0.275704	0.0896842	0	0	0	211.9	45.2	80.1	62.7		High	High	High	High	High	0.0002176	0.004638	2.85	54.19
FALSE	High	[R].SIAKEGFEKISKGANPVEIR.[R]	R	3xAcetyl:2H(3) [K4; K9; K12]	P10809 3xAcetyl:2H(3) [K125; K130; K133]	FALSE	6.24715e-05	0	1	1	3	P10809	P10809 [122-141]	0	2308.29	0	0.627	0.015	2.793	0.865354	1.21305e-09	0.0231616	0	0	0	90.2	56.6	1.3	251.9		Peak Found	High	Peak Found	High	High	0	3.995e-07	5.52	54.19
FALSE	High	[-].MEKTELIQKAKLAEQAER.[Y]	-	1xAcetyl [N-Term]; 3xAcetyl:2H(3) [K3; K9; K11]	P27348 1xAcetyl [N-Term]; 3xAcetyl:2H(3) [K3; K9; K11]	FALSE	6.50332e-06	0	1	1	29	P27348	P27348 [1-18]	0	2293.24	0	0.734	0.957	0.802	0.960927	0.94872	0.997471	0	0	0	114.5	84.1	109.6	91.8		High	High	High	High	High	0	5.713e-08	5.95	64.89
FALSE	High	[R].SIAKEGFEKISKGANPVEIR.[R]	R	3xAcetyl:2H(3) [K4; K9; K12]; 1xAcetyl:2H(3) [N-Term]	P10809 3xAcetyl:2H(3) [K125; K130; K133]; 1xAcetyl:2H(3) [N-Term]	FALSE	0.000361257	0	1	1	9	P10809	P10809 [122-141]	0	2353.32	0	0.581	0.123	0.922	0.802121	0.00091194	0.943001	0	0	0	152.4	88.5	18.7	140.4		High	High	High	High	High	0	4.24e-06	4.74	67.1
FALSE	High	[-].MEGVEEKKKEVPAVPETLKKKR.[R]	-	1xAcetyl [N-Term]; 6xAcetyl:2H(3) [K7; K8; K9; K19; K20; K21]	P18124 1xAcetyl [N-Term]; 6xAcetyl:2H(3) [K7; K8; K9; K19; K20; K21]	FALSE	4.6177e-06	0	1	1	27	P18124	P18124 [1-22]	0	2865.63	0	0.623	0.847	0.673	0.860807	0.997914	0.919342	0	0	0	127.2	79.3	107.8	85.7		High	High	High	High	High	0	3.999e-10	5.08	59.24
FALSE	High	[-].MEGQSVEELLAKAEQDEAEKLQR.[I]	-	1xAcetyl [N-Term]; 2xAcetyl:2H(3) [K12; K20]	Q15050 1xAcetyl [N-Term]; 2xAcetyl:2H(3) [K12; K20]	FALSE	0.000521358	0	1	1	1	Q15050	Q15050 [1-23]	0	2763.36	0	0.01	0.047	0.01	4.34403e-17	0.114388	4.94188e-17		0		382.1		17.9			High	Not Found	Peak Found	Not Found	High	0	1.242e-06	4.59	80.34
FALSE	High	[-].MEGPLSVFGDR.[S]	-	1xAcetyl [N-Term]	P17987 1xAcetyl [N-Term]	FALSE	0.0193364	0	1	1	16	P17987	P17987 [1-11]	0	1249.59	0	0.428	0.632	0.256	0.452942	0.841258	0.0416705	0	0	0	172.7	74	109.2	44.2		High	High	High	High	High	0	0.001134	3.2	63.84
FALSE	High	[-].MEEVPHDCPGADSAQAGR.[G]	-	1xAcetyl [N-Term]; 1xCarbamidomethyl [C8]	P53384 1xAcetyl [N-Term]; 1xCarbamidomethyl [C8]	FALSE	0.000101267	0	1	1	3	P53384	P53384 [1-18]	0	1968.82	0	0.446	0.813	0.342	0.87306	0.959081	0.558913	0	0	0	153.8	68.6	125	52.6		High	Peak Found	Peak Found	Peak Found	High	0	7.63e-08	4.01	28.41
FALSE	High	[-].MEEIYAKFVSQKISKTR.[W]	-	1xAcetyl [N-Term]; 3xAcetyl:2H(3) [K7; K12; K15]	Q8NFH3 1xAcetyl [N-Term]; 3xAcetyl:2H(3) [K7; K12; K15]	FALSE	0.0028516	0	1	1	1	Q8NFH3	Q8NFH3 [1-17]	0	2235.2	0	0.871	0.883	0.451	0.946955	0.959081	0.832989	0	0	0	124.8	108.7	110.2	56.3		Peak Found	High	Peak Found	Peak Found	High	0	2.239e-05	3.78	81.1
FALSE	High	[R].SIAKEGFEKISKGANPVEIRR.[G]	R	3xAcetyl:2H(3) [K4; K9; K12]	P10809 3xAcetyl:2H(3) [K125; K130; K133]	FALSE	0.0257076	0	1	1	2	P10809	P10809 [122-142]	1	2464.39	0	0.01	0.01	3.734	4.34403e-17	3.7678e-17	0.129695			0	84.5			315.5		Peak Found	Not Found	Not Found	High	High	0	0.0009534	3.39	49.35
FALSE	High	[R].MEELHNQEVQKR.[K]	R	1xAcetyl:2H(3) [K11]	Q15233 1xAcetyl:2H(3) [K336]	FALSE	0.0136775	0	1	1	2	Q15233	Q15233 [326-337]	0	1585.78	0	0.177	0.132	0.7	0.389131	0.464458	0.970648	0	0	0	199.1	35.2	26.3	139.4		Peak Found	Peak Found	Peak Found	High	High	0.0001346	0.002428	4.28	20.39
FALSE	High	[-].MEDLDQSPLVSSSDSPPRPQPAFKYQFVR.[E]	-	1xAcetyl [N-Term]; 1xAcetyl:2H(3) [K24]	Q9NQC3 1xAcetyl [N-Term]; 1xAcetyl:2H(3) [K24]	FALSE	0.00437329	0	1	1	4	Q9NQC3	Q9NQC3 [1-29]	0	3408.66	0	0.01	0.01	0.01	4.34403e-17	3.7678e-17	4.94188e-17				400					High	Not Found	Not Found	Not Found	High	6.911e-05	0.001584	4.06	61.69
FALSE	High	[-].MEATTAGVGR.[L]	-	1xAcetyl [N-Term]	Q8WUD4 1xAcetyl [N-Term]	FALSE	0.0196915	0	1	1	1	Q8WUD4	Q8WUD4 [1-10]	0	1034.49	0	0.134	0.258	0.429	0.137608	0.75464	0.790245	0	0	0	219.7	29.5	56.6	94.2		High	Peak Found	Peak Found	Peak Found	High	0	0.0006036	3.11	27.85
FALSE	High	[-].MEANGLGPQGFPELKNDTFLR.[A]	-	1xAcetyl [N-Term]; 1xAcetyl:2H(3) [K15]	P06132 1xAcetyl [N-Term]; 1xAcetyl:2H(3) [K15]	FALSE	0.00429388	0	1	1	10	P06132	P06132 [1-21]	0	2421.19	0	0.592	0.947	0.583	0.921894	0.950229	0.886663	0	0	0	128.1	75.8	121.3	74.7		High	High	High	High	High	0	4.496e-05	4.32	68.27
FALSE	High	[-].MEALGKLKQFDAYPKTLEDFR.[V]	-	1xAcetyl [N-Term]; 3xAcetyl:2H(3) [K6; K8; K15]	Q9Y282 1xAcetyl [N-Term]; 3xAcetyl:2H(3) [K6; K8; K15]	FALSE	9.15894e-06	0	1	1	8	Q9Y282	Q9Y282 [1-21]	0	2677.39	0	0.01	0.188	0.487	4.34403e-17	0.602167	0.847661		0	0	238.8		44.8	116.4		High	Not Found	High	High	High	0	1.278e-09	5.58	83.79
FALSE	High	[-].MDWVMKHNGPNDASDGTVR.[L]	-	1xAcetyl [N-Term]; 1xAcetyl:2H(3) [K6]	P31942 1xAcetyl [N-Term]; 1xAcetyl:2H(3) [K6]	FALSE	0.000181027	0	1	1	1	P31942	P31942 [1-19]	0	2216.99	0	0.586	0.881	0.433	0.935955	0.969912	0.665067	0	0	0	137.9	80.9	121.5	59.7		High	Peak Found	Peak Found	Peak Found	High	0	2.057e-07	4.95	49.38
FALSE	High	[R].SLDIDTAKSMLALLLGR.[T]	R	1xAcetyl:2H(3) [K8]; 1xAcetyl:2H(3) [N-Term]	Q9BTE7 1xAcetyl:2H(3) [K163]; 1xAcetyl:2H(3) [N-Term]	FALSE	0.000630155	0	1	1	1	Q9BTE7	Q9BTE7 [156-172]	0	1907.08	0	0.206	0.01	0.923	0.527793	3.7678e-17	0.966123	0		0	187.9	38.7		173.4		High	Peak Found	Not Found	Peak Found	High	0	1.7e-06	3.92	101.12
FALSE	High	[V].MDVNTALQEVLKTALIHDGLAR.[G]	V	1xAcetyl [N-Term]; 1xAcetyl:2H(3) [K12]	P25398 1xAcetyl [N-Term]; 1xAcetyl:2H(3) [K23]	FALSE	0.00031195	0	1	1	9	P25398	P25398 [12-33]	0	2495.34	0	0.632	1.413	1.293	0.943146	0.633781	0.648333	0	0	0	92.2	58.2	130.3	119.3		High	High	High	High	High	0	1.251e-05	5.85	85.4
FALSE	High	[F].SLEDPQTHANR.[I]	F	1xAcetyl:2H(3) [N-Term]	P07900 1xAcetyl:2H(3) [N-Term]	FALSE	0.0290124	0	1	1	5	P07900	P07900 [677-687]	0	1312.63	0	0.666	0.667	0.581	0.90599	0.88052	0.797254	0	0	0	137.3	91.4	91.6	79.7		High	High	High	High	High	0.0002176	0.005906	3.64	20.49
FALSE	High	[R].MDTIDQDDELIR.[Y]	R			FALSE	0.0184202	0	1	1	1	Q93008	Q93008 [1956-1967]	0	1463.67	0	0.01	0.184	1.09	4.34403e-17	0.619286	0.926734		0	0	175.8		32.4	191.7		High	Not Found	Peak Found	Peak Found	High	0	0.0005402	2.59	38.12
FALSE	High	[R].MDTDLETMDLDQGGEALAPR.[Q]	R			FALSE	0.000248789	0	1	1	1	O75643	O75643 [387-406]	0	2177.97	0	0.01	0.022	0.539	4.34403e-17	0.0359845	0.892646		0	0	256.2		5.7	138.1		Peak Found	Not Found	Peak Found	High	High	0	3.532e-07	4.04	49.12
FALSE	High	[E].LYILTNVGEPTEFKLMR.[T]	E	1xAcetyl:2H(3) [K14]; 1xAcetyl:2H(3) [N-Term]	Q4J6C6 1xAcetyl:2H(3) [K323]; 1xAcetyl:2H(3) [N-Term]	FALSE	0.0118914	0	1	1	4	Q4J6C6	Q4J6C6 [310-326]	0	2114.15	0	100	100	100	4.34403e-17	3.7678e-17	4.94188e-17					80.2	140.2	179.6		Not Found	High	Peak Found	High	High	0	0.0003068	4.3	84.23
FALSE	High	[R].IVSQLLTLMDGLKQR.[A]	R	1xAcetyl:2H(3) [K13]	P55072 1xAcetyl:2H(3) [K336]	FALSE	0.00281697	0	1	1	2	P55072	P55072 [324-338]	0	1760.02	0														No Quan Values	High	Not Found	Not Found	Not Found	High	0	2.193e-05	4.3
FALSE	High	[R].LVNHFVEEFKR.[K]	R	1xAcetyl:2H(3) [K10]	P0DMV9 1xAcetyl:2H(3) [K246]	FALSE	0.0121845	0	1	1	12	P0DMV9	P0DMV9 [237-247]	0	1462.79	0	0.506	0.121	0.914	0.905375	0.419318	0.963108	0	0	0	157.4	79.6	19.1	143.9		High	Peak Found	Peak Found	High	High	0.0009536	0.01485	3.62	41.33
FALSE	High	[R].SLLKTYEQVLENLESKR.[F]	R	2xAcetyl:2H(3) [K4; K16]; 1xAcetyl:2H(3) [N-Term]	Q16762 2xAcetyl:2H(3) [K163; K175]; 1xAcetyl:2H(3) [N-Term]	FALSE	0.000250315	0	1	1	2	Q16762	Q16762 [160-176]	0	2185.21	0	1.046	1.138	0.802	0.87306	0.902282	0.997764	0	0	0	100.4	105	114.2	80.5		High	Peak Found	Peak Found	High	High	0	3.547e-07	5.37	89.83
FALSE	High	[R].ISGLIYEETR.[G]	R	1xAcetyl:2H(3) [N-Term]	P62805 1xAcetyl:2H(3) [N-Term]	FALSE	0.0255525	0	1	1	20	P62805	P62805 [47-56]	0	1225.65	0	0.713	0.842	0.609	0.941986	0.99998	0.846096	0	0	0	126.4	90.2	106.4	77		High	High	High	High	High	0.0002176	0.004283	3.47	59.46
FALSE	High	[R].ISGLIYEETR.[G]	R			FALSE	0.0159222	0	1	1	17	P62805	P62805 [47-56]	0	1180.62	0	0.564	0.563	0.656	0.776272	0.719567	0.90318	0	0	0	143.8	81	80.9	94.3		High	High	High	High	High	0	0.0004187	4.5	35.51
FALSE	High	[E].LSGALTGLTR.[V]	E	1xAcetyl:2H(3) [N-Term]	P26639 1xAcetyl:2H(3) [N-Term]	FALSE	0.0255525	0	1	1	1	P26639	P26639 [445-454]	0	1033.61	0	32.25	18.311	21.317	1.19562e-05	0.0335311	0.000181617	0	0	0	5.5	177	100.5	117		Peak Found	High	Peak Found	Peak Found	High	0	0.0009463	3	55.32
FALSE	High	[R].LSEDYGVLKTDEGIAYR.[G]	R	1xAcetyl:2H(3) [K9]; 1xAcetyl:2H(3) [N-Term]	P32119 1xAcetyl:2H(3) [K119]; 1xAcetyl:2H(3) [N-Term]	FALSE	0.00608145	0	1	1	1	P32119	P32119 [111-127]	0	2019.02	0	0.386	0.447	0.626	0.776272	0.935887	0.942976	0	0	0	162.7	62.9	72.7	101.8		High	Peak Found	Peak Found	Peak Found	High	0	8.082e-05	2.87	50.9
FALSE	High	[R].SILLGLLLGAGR.[T]	R	1xAcetyl:2H(3) [N-Term]	P50336 1xAcetyl:2H(3) [N-Term]	FALSE	0.00119732	0	1	1	44	P50336	P50336 [196-207]	0	1227.79	0	0.883	0.73	1.095	0.939655	0.983495	0.909807	0	0	0	107.9	95.3	78.7	118.2		High	High	High	High	High	0	0.0002169	3.99	98.7
FALSE	High	[E].IQLKEAKHIAEEADRKYEEVAR.[K]	E	3xAcetyl:2H(3) [K4; K7; K16]; 1xAcetyl:2H(3) [N-Term]	P06753 3xAcetyl:2H(3) [K150; K153; K162]; 1xAcetyl:2H(3) [N-Term]	FALSE	0.00336302	0	1	1	7	P06753	P06753 [147-168]	1	2806.51	0	2.643	14.484	10.529	0.289902	1.60941e-05	4.00676e-05	0	0	0	14	36.9	202.2	147		Peak Found	Peak Found	High	High	High	0	2.948e-05	4.6	68.79
FALSE	High	[E].IQLKEAKHIAEEADR.[K]	E	2xAcetyl:2H(3) [K4; K7]; 1xAcetyl:2H(3) [N-Term]	P06753 2xAcetyl:2H(3) [K150; K153]; 1xAcetyl:2H(3) [N-Term]	FALSE	0.00171719	0	1	1	4	P06753	P06753 [147-161]	0	1886.03	0	6.29	12.793	17.123	0.0382751	0.0263322	1.23605e-05	0	0	0	10.8	67.6	137.5	184.1		Peak Found	Peak Found	High	Peak Found	High	0	9.369e-06	6	57.27
FALSE	High	[E].LQLKDEEMIGPIIDKLEKVAVR.[G]	E	1xOxidation [M8]; 3xAcetyl:2H(3) [K4; K15; K18]; 1xAcetyl:2H(3) [N-Term]	Q9NTK5 1xOxidation [M159]; 3xAcetyl:2H(3) [K155; K166; K169]; 1xAcetyl:2H(3) [N-Term]	FALSE	0.0185323	0	1	1	1	Q9NTK5	Q9NTK5 [152-173]	0	2733.55	0														No Quan Values	Not Found	High	Not Found	Not Found	High	0	0.0005458	3.72
FALSE	High	[E].LQLKDEEMIGPIIDKLEKVAVR.[G]	E	3xAcetyl:2H(3) [K4; K15; K18]; 1xAcetyl:2H(3) [N-Term]	Q9NTK5 3xAcetyl:2H(3) [K155; K166; K169]; 1xAcetyl:2H(3) [N-Term]	FALSE	0.000297058	0	1	1	74	Q9NTK5	Q9NTK5 [152-173]	0	2717.55	0	100	100	100	4.34403e-17	3.7678e-17	4.94188e-17					151.1	74.2	174.7		Not Found	High	High	High	High	0	5.56e-06	4.78	97.99
FALSE	High	[E].LQIGADDVEAFVIDAVR.[T]	E	1xAcetyl:2H(3) [N-Term]	Q7L2H7 1xAcetyl:2H(3) [N-Term]	FALSE	4.77352e-05	0	1	1	8	Q7L2H7	Q7L2H7 [301-317]	0	1875.99	0		100	100		3.7678e-17	4.94188e-17						115.9	284.1		Not Found	Not Found	High	High	High	0	2.126e-08	3.97	90.28
FALSE	High	[M].SLLNKPKSEMTPEELQKR.[E]	M	1xAcetyl [N-Term]; 3xAcetyl:2H(3) [K5; K7; K17]	P62316 1xAcetyl [N-Term]; 3xAcetyl:2H(3) [K6; K8; K18]	FALSE	0.00101516	0	1	1	13	P62316	P62316 [2-19]	0	2305.24	0	0.451	0.567	0.538	0.513311	0.727864	0.705885	0	0	0	156.5	70.7	88.7	84.1		High	High	High	High	High	0	6.753e-06	4.71	54.14
FALSE	High	[E].LQLALALSQSEAEEKER.[L]	E	1xAcetyl:2H(3) [K15]; 1xAcetyl:2H(3) [N-Term]	O14964 1xAcetyl:2H(3) [K277]; 1xAcetyl:2H(3) [N-Term]	FALSE	0.00326185	0	1	1	3	O14964	O14964 [263-279]	0	2005.07	0	100		100	4.34403e-17		4.94188e-17					50.7		349.3		Not Found	High	Not Found	Peak Found	High	0	2.799e-05	4.51	76.05
FALSE	High	[E].LQKDLEEVKVLLEKATR.[K]	E	3xAcetyl:2H(3) [K3; K9; K14]; 1xAcetyl:2H(3) [N-Term]	Q9HB71 3xAcetyl:2H(3) [K8; K14; K19]; 1xAcetyl:2H(3) [N-Term]	FALSE	0.00366331	0	1	1	13	Q9HB71	Q9HB71 [6-22]	0	2192.29	0	100	100	100	4.34403e-17	3.7678e-17	4.94188e-17					169	101.8	129.2		Not Found	High	High	High	High	0	0.0002601	3.6	99.92
FALSE	High	[E].SILQVLSQMEKIVR.[I]	E	1xAcetyl:2H(3) [K11]; 1xAcetyl:2H(3) [N-Term]	P17174 1xAcetyl:2H(3) [K290]; 1xAcetyl:2H(3) [N-Term]	FALSE	0.000600076	0	1	1	24	P17174	P17174 [280-293]	0	1734.01	0	51.673	61.639	97.175	1.23213e-05	0.00104757	5.6344e-07	0	0	0	1.9	97.7	116.6	183.8		Peak Found	High	High	High	High	0	1.574e-06	4.88	96.33
FALSE	High	[E].LQGVKGGVDHAAAFGR.[I]	E	1xAcetyl:2H(3) [K5]; 1xAcetyl:2H(3) [N-Term]	Q9HC38 1xAcetyl:2H(3) [K205]; 1xAcetyl:2H(3) [N-Term]	FALSE	0.00491138	0	1	1	1	Q9HC38	Q9HC38 [201-216]	0	1672.9	0	12.802	9.627	14.467	0.00198972	0.0964817	0.000856554	0	0	0	10.6	135.1	101.6	152.7		Peak Found	High	Peak Found	Peak Found	High	0	5.617e-05	4.61	48.37
FALSE	High	[E].LQEIQLKEAKHIAEEADR.[K]	E	2xAcetyl:2H(3) [K7; K10]; 1xAcetyl:2H(3) [N-Term]	P06753 2xAcetyl:2H(3) [K150; K153]; 1xAcetyl:2H(3) [N-Term]	FALSE	0.000544155	0	1	1	1	P06753	P06753 [144-161]	0	2256.22	0	100	100	100	4.34403e-17	3.7678e-17	4.94188e-17					45.2	95.3	259.6		Not Found	Peak Found	High	Peak Found	High	0	1.332e-06	5.34	60.88
FALSE	High	[R].IQEIIEQLDVTTSEYEKEKLNER.[L]	R	2xAcetyl:2H(3) [K17; K19]	P10809 2xAcetyl:2H(3) [K387; K389]	FALSE	7.01677e-05	0	1	1	3	P10809	P10809 [371-393]	0	2897.49	0	0.01	0.01	1.142	4.34403e-17	3.7678e-17	0.840119			0	186.8			213.2		High	Not Found	Not Found	High	High	0	4.097e-08	7.02	64.21
FALSE	High	[E].IQELDKDDESLRKYKEALLGR.[V]	E	3xAcetyl:2H(3) [K6; K13; K15]; 1xAcetyl:2H(3) [N-Term]	P52565 3xAcetyl:2H(3) [K43; K50; K52]; 1xAcetyl:2H(3) [N-Term]	FALSE	0.00650374	0	1	1	3	P52565	P52565 [38-58]	1	2699.46	0	100	100	100	4.34403e-17	3.7678e-17	4.94188e-17					88	214	97.9		Not Found	Peak Found	High	Peak Found	High	0	9.046e-05	4.61	73.28
FALSE	High	[E].IQELDKDDESLR.[K]	E	1xAcetyl:2H(3) [K6]; 1xAcetyl:2H(3) [N-Term]	P52565 1xAcetyl:2H(3) [K43]; 1xAcetyl:2H(3) [N-Term]	FALSE	0.00815056	0	1	1	18	P52565	P52565 [38-49]	0	1550.78	0	27.232	25.359	25.504	1.63535e-10	4.66201e-10	6.01059e-13	0	0	0	5.1	137.7	128.2	129		Peak Found	High	High	High	High	0	0.0001336	3.68	49.78
FALSE	High	[E].LQEKVVQVSAGDSHTAALTDDGR.[V]	E	1xAcetyl:2H(3) [K4]; 1xAcetyl:2H(3) [N-Term]	P18754 1xAcetyl:2H(3) [K120]; 1xAcetyl:2H(3) [N-Term]	FALSE	6.1336e-05	0	1	1	2	P18754	P18754 [117-139]	0	2487.26	0	100	100	100	4.34403e-17	3.7678e-17	4.94188e-17					130.4	134.7	134.9		Not Found	Peak Found	High	Peak Found	High	0	3.259e-08	5.31	48.13
FALSE	High	[R].LQDEIQNMKEEMAR.[H]	R	1xAcetyl:2H(3) [K9]	P08670 1xAcetyl:2H(3) [K373]	FALSE	0.0143593	0	1	1	1	P08670	P08670 [365-378]	0	1779.84	0	7.013	4.566	8.466	0.0108888	0.236612	0.000312535	0	0	0	19	133.3	86.8	160.9		Peak Found	Peak Found	Peak Found	High	High	0	0.0003505	4.21	49.47
FALSE	High	[E].LQAAGKSPEDLER.[L]	E	1xAcetyl:2H(3) [K6]; 1xAcetyl:2H(3) [N-Term]	P06744 1xAcetyl:2H(3) [K454]; 1xAcetyl:2H(3) [N-Term]	FALSE	0.00292215	0	1	1	18	P06744	P06744 [449-461]	0	1503.79	0	31.11	23.202	22.716	2.99607e-11	1.37209e-09	3.68889e-12	0	0	0	5.1	159.5	118.9	116.5		Peak Found	High	High	High	High	0.0002176	0.004472	3.57	41.75
FALSE	High	[E].LSLLGKKKKR.[L]	E	4xAcetyl:2H(3) [K6; K7; K8; K9]; 1xAcetyl:2H(3) [N-Term]	P32969 4xAcetyl:2H(3) [K50; K51; K52; K53]; 1xAcetyl:2H(3) [N-Term]	FALSE	0.0283195	0	1	1	3	P32969	P32969 [45-54]	0	1395.95	0	100		100	4.34403e-17		4.94188e-17					250.4		149.6		Not Found	High	Not Found	Peak Found	High	0.0001346	0.002559	1.82	58.89
FALSE	High	[F].SLLATEDKEALKKQLPGVKSEGKR.[K]	F	5xAcetyl:2H(3) [K8; K12; K13; K19; K23]; 1xAcetyl:2H(3) [N-Term]	P09874 5xAcetyl:2H(3) [K192; K196; K197; K203; K207]; 1xAcetyl:2H(3) [N-Term]	FALSE	0.00575636	0	1	1	3	P09874	P09874 [185-208]	0	2895.67	0	0.347	0.01	0.86	0.5824	3.7678e-17	0.985609	0		0	181.3	62.8		155.9		Peak Found	High	Not Found	High	High	0	7.398e-05	4	64.5
FALSE	High	[R].SIKVKSLNDITAKER.[F]	R	3xAcetyl:2H(3) [K3; K5; K13]; 1xAcetyl:2H(3) [N-Term]	P48047 3xAcetyl:2H(3) [K88; K90; K98]; 1xAcetyl:2H(3) [N-Term]	FALSE	0.00470585	0	1	1	1	P48047	P48047 [86-100]	0	1882.1	0	0.599	0.668	0.653	0.960927	0.99998	0.965626	0	0	0	137	82.1	91.5	89.5		High	Peak Found	Peak Found	Peak Found	High	0	5.23e-05	2.89	55.49
FALSE	High	[E].ISYLKKLKVKKQDR.[I]	E	5xAcetyl:2H(3) [K5; K6; K8; K10; K11]; 1xAcetyl:2H(3) [N-Term]	P09874 5xAcetyl:2H(3) [K346; K347; K349; K351; K352]; 1xAcetyl:2H(3) [N-Term]	FALSE	0.00972649	0	1	1	1	P09874	P09874 [342-355]	0	2017.27	0	100		100	4.34403e-17		4.94188e-17					77.9		322.1		Not Found	High	Not Found	Peak Found	High	0	0.0001802	2.93	73.39
FALSE	High	[R].SLGTADVHFER.[K]	R	1xAcetyl:2H(3) [N-Term]	Q86V81 1xAcetyl:2H(3) [N-Term]	FALSE	0.0220957	0	1	1	18	Q86V81	Q86V81 [145-155]	0	1276.64	0	0.946	1.014	0.772	0.935955	0.915311	0.987852	0	0	0	107.2	101.4	108.7	82.7		High	High	High	High	High	6.911e-05	0.001722	4.09	35.7
FALSE	High	[E].IVLAKPPDKKR.[K]	E	3xAcetyl:2H(3) [K5; K9; K10]; 1xAcetyl:2H(3) [N-Term]	O43390 3xAcetyl:2H(3) [K410; K414; K415]; 1xAcetyl:2H(3) [N-Term]	FALSE	0.0273107	0	1	1	13	O43390	O43390 [406-416]	0	1444.93	0	37.319	33.87	28.159	2.65381e-12	1.15495e-11	1.20145e-13	0	0	0	4	148.8	135	112.2		Peak Found	High	High	High	High	0.009531	0.09792	2.12	48.95
FALSE	High	[M].SIGVPIKVLHEAEGHIVTCETNTGEVYR.[G]	M	1xAcetyl [N-Term]; 1xCarbamidomethyl [C19]; 1xAcetyl:2H(3) [K7]	P62318 1xAcetyl [N-Term]; 1xCarbamidomethyl [C20]; 1xAcetyl:2H(3) [K8]	FALSE	0.000146151	0	1	1	4	P62318	P62318 [2-29]	0	3195.62	0	0.168	0.486	0.351	0.154311	0.860524	0.446602	0	0	0	199.5	33.6	97	70		High	Peak Found	Peak Found	Peak Found	High	0	2.535e-06	5.18	65.44
FALSE	High	[E].IVLADVIDNDSWR.[L]	E	1xAcetyl:2H(3) [N-Term]	P22234 1xAcetyl:2H(3) [N-Term]	FALSE	0.00175969	0	1	1	16	P22234	P22234 [203-215]	0	1560.81	0	31.543	21.66	13.468	2.50125e-11	3.10491e-09	6.52658e-09	0	0	0	5.9	186.4	128	79.6		Peak Found	High	High	High	High	0	0.0001317	4.09	78.69
FALSE	High	[R].SLGYAYVNFQQPADAER.[A]	R	1xAcetyl:2H(3) [N-Term]	Q13310 1xAcetyl:2H(3) [N-Term]; P11940 1xAcetyl:2H(3) [N-Term]	FALSE	0.000256513	0	1	2	5	P11940	Q13310 [51-67]; P11940 [51-67]	0	1973.94	0	0.716	0.446	0.857	0.991735	0.835715	0.986044	0	0	0	132.5	94.9	59.1	113.5		High	High	Peak Found	High	High	0	3.718e-07	3.81	53.83
FALSE	High	[R].IVKHAFEIIHLLTGENPLQVLVNAIINSGPR.[E]	R	1xAcetyl:2H(3) [K3]	P46782 1xAcetyl:2H(3) [K94]	FALSE	7.5973e-05	0	1	1	22	P46782	P46782 [92-122]	0	3450.97	0	0.809	0.945	3.162	0.969906	0.948841	0.126561	0	0	0	67.6	54.7	63.9	213.8		Peak Found	High	High	High	High	0	4.692e-08	5.79	95.7
FALSE	High	[R].LVKEKVMYEKEAKQQEEKIEKMR.[A]	R	6xAcetyl:2H(3) [K3; K5; K10; K13; K18; K21]	O75347 6xAcetyl:2H(3) [K21; K23; K28; K31; K36; K39]	FALSE	4.31733e-06	0	1	1	7	O75347	O75347 [19-41]	0	3164.72	0	0.01	0.078	0.496	4.34403e-17	0.229791	0.862005		0	0	254.2		19.8	126		High	Not Found	Peak Found	Peak Found	High	0	3.554e-10	5.18	58.84
FALSE	High	[R].IVGTKPLYVALAQR.[K]	R	1xAcetyl [N-Term]; 1xAcetyl:2H(3) [K5]	Q4VXU2 1xAcetyl [N-Term]; 1xAcetyl:2H(3) [K361]	FALSE	0.00619383	0	1	1	3	Q4VXU2	Q4VXU2 [357-370]	0	1615.96	0	1.112	0.089	0.903	0.849702	0.244362	0.985138	0	0	0	128.9	143.3	11.4	116.4		Peak Found	Peak Found	High	Peak Found	High	0	9.268e-05	3.44	68.68
FALSE	High	[E].LVFKEDGQEYAQVIKMLGNGR.[L]	E	2xAcetyl:2H(3) [K4; K15]; 1xAcetyl:2H(3) [N-Term]	P47813 2xAcetyl:2H(3) [K29; K40]; 1xAcetyl:2H(3) [N-Term]; O14602 2xAcetyl:2H(3) [K29; K40]; 1xAcetyl:2H(3) [N-Term]	FALSE	0.00107257	0	1	2	3	O14602	P47813 [26-46]; O14602 [26-46]	0	2530.33	0		100	100		3.7678e-17	4.94188e-17						93.1	306.9		Not Found	Not Found	Peak Found	High	High	0	9.532e-06	3.98	83.25
FALSE	High	[R].SLHDAIMIVR.[R]	R	1xAcetyl:2H(3) [N-Term]	Q99832 1xAcetyl:2H(3) [N-Term]	FALSE	0.0291882	0	1	1	4	Q99832	Q99832 [388-397]	0	1199.66	0	0.858	1.026	0.723	0.979382	0.905407	0.963108	0	0	0	110.9	95.2	113.8	80.2		High	Peak Found	High	High	High	0.0001879	0.002922	3.75	47.32
FALSE	High	[R].LVAVGLLGIALALLGER.[L]	R			FALSE	0.0057916	0	1	1	6	Q15165	Q15165 [4-20]	0	1678.06	0	0.297	0.01	0.01	0.751166	3.7678e-17	4.94188e-17	0			308.5	91.5				High	Peak Found	Not Found	Not Found	High	0	7.43e-05	3.93	101.44
FALSE	High	[R].SKVGSTENIKHQPGGGR.[A]	R	2xAcetyl:2H(3) [K2; K10]; 1xAcetyl:2H(3) [N-Term]	P27816 2xAcetyl:2H(3) [K938; K946]; 1xAcetyl:2H(3) [N-Term]	FALSE	0.000377054	0	1	1	2	P27816	P27816 [937-953]	0	1887	0	0.495	0.205	0.564	0.853968	0.357953	0.871262	0	0	0	176.7	87.4	36.2	99.7		High	Peak Found	Peak Found	High	High	0	7.106e-07	5.57	27.38
FALSE	High	[R].IVAPGKGILAADESTGSIAKR.[L]	R	2xAcetyl:2H(3) [K6; K20]	P04075 2xAcetyl:2H(3) [K28; K42]	FALSE	4.08616e-06	0	1	1	3	P04075	P04075 [23-43]	0	2144.22	0	0.299	0.958	0.533	0.596464	0.94872	0.907903	0	0	0	143.4	42.8	137.4	76.4		High	High	High	Peak Found	High	0	9.516e-09	5.75	45.42
FALSE	High	[KR].LTVEDPVTVEYITR.[FY]	K			FALSE	0.00357488	0	1	2	1	Q8TAA3	Q8TAA3 [104-117]; O14818 [96-109]	0	1634.86	0	0.999	2.333	0.473	0.895407	0.596548	0.827616	0	0	0	83.2	83.2	194.2	39.4		Peak Found	High	Peak Found	Peak Found	High	0	3.271e-05	4.27	46.97
FALSE	High	[E].ITTKDLKEKKEVVEEAENGR.[D]	E	4xAcetyl:2H(3) [K4; K7; K9; K10]; 1xAcetyl:2H(3) [N-Term]	P06454 4xAcetyl:2H(3) [K15; K18; K20; K21]; 1xAcetyl:2H(3) [N-Term]	FALSE	0.000747807	0	1	1	9	P06454	P06454 [12-31]	0	2541.39	0	4.987	8.357	8.888	0.0607317	0.131681	0.0152785	0	0	0	17.2	85.9	143.9	153		Peak Found	High	High	High	High	0	3.806e-06	4.72	67.29
FALSE	High	[E].LTQQVFDAKNMMAACDPR.[H]	E	1xCarbamidomethyl [C15]; 1xOxidation [M11]; 1xAcetyl:2H(3) [K9]; 1xAcetyl:2H(3) [N-Term]	P07437 1xCarbamidomethyl [C303]; 1xOxidation [M299]; 1xAcetyl:2H(3) [K297]; 1xAcetyl:2H(3) [N-Term]	FALSE	0.00227459	0	1	1	4	P07437	P07437 [289-306]	0	2202.03	0	100	100	100	4.34403e-17	3.7678e-17	4.94188e-17					178.6	84.4	137		Not Found	Peak Found	Peak Found	High	High	0	1.513e-05	5.08	58.79
FALSE	High	[E].LTQQVFDAKNMMAACDPR.[H]	E	1xCarbamidomethyl [C15]; 1xAcetyl:2H(3) [K9]; 1xAcetyl:2H(3) [N-Term]	P07437 1xCarbamidomethyl [C303]; 1xAcetyl:2H(3) [K297]; 1xAcetyl:2H(3) [N-Term]	FALSE	0.000637907	0	1	1	1	P07437	P07437 [289-306]	0	2186.03	0	18.372	16.644	27.81	0.000343765	0.0570447	9.05537e-05	0	0	0	6.3	115.1	104.3	174.3		Peak Found	Peak Found	Peak Found	High	High	0	1.738e-06	3.25	65.19
FALSE	High	[E].ITNACFEPANQMVKCDPR.[H]	E	2xCarbamidomethyl [C5; C15]; 1xAcetyl:2H(3) [K14]; 1xAcetyl:2H(3) [N-Term]	Q13748 2xCarbamidomethyl [C295; C305]; 1xAcetyl:2H(3) [K304]; 1xAcetyl:2H(3) [N-Term]; Q6PEY2 2xCarbamidomethyl [C295; C305]; 1xAcetyl:2H(3) [K304]; 1xAcetyl:2H(3) [N-Term]; Q71U36 2xCarbamidomethyl [C295; C305]; 1xAcetyl:2H(3) [K304]; 1xAcetyl:2H(3) [N-Term]; P68363 2xCarbamidomethyl [C295; C305]; 1xAcetyl:2H(3) [K304]; 1xAcetyl:2H(3) [N-Term]; Q9BQE3 2xCarbamidomethyl [C295; C305]; 1xAcetyl:2H(…	FALSE	0.000403286	0	2	6	6	Q13748; P68363	Q13748 [291-308]; Q6PEY2 [291-308]; Q71U36 [291-308]; P68363 [291-308]; Q9BQE3 [291-308]; P68366 [291-308]	0	2241.04	0	17.762	19.6	15.079	5.85667e-08	4.94211e-07	7.16517e-07	0	0	0	7.5	132.9	146.7	112.9	Shared	Peak Found	High	High	Peak Found	High	0	7.99e-07	4.7	49.87
FALSE	High	[E].LTKVEEEIVTLR.[Q]	E	1xAcetyl:2H(3) [K3]; 1xAcetyl:2H(3) [N-Term]	O43399 1xAcetyl:2H(3) [K55]; 1xAcetyl:2H(3) [N-Term]	FALSE	0.0039904	0	1	1	17	O43399	O43399 [53-64]	0	1519.88	0	27.115	22.166	31.6	7.9446e-05	0.0312055	2.55555e-05	0	0	0	4.9	132.5	108.3	154.4		Peak Found	High	High	High	High	0	3.969e-05	3.19	74.6
FALSE	High	[E].LTGLKVFGNEIKLEKPKGKDSKKER.[D]	E	7xAcetyl:2H(3) [K5; K12; K15; K17; K19; K22; K23]; 1xAcetyl:2H(3) [N-Term]	P19338 7xAcetyl:2H(3) [K370; K377; K380; K382; K384; K387; K388]; 1xAcetyl:2H(3) [N-Term]	FALSE	2.09094e-05	0	1	1	11	P19338	P19338 [366-390]	0	3202.89	0	34.444	30.939	38.443	4.45556e-10	2.79444e-06	9.7009e-15	0	0	0	3.8	131.4	118.1	146.7		Peak Found	High	High	High	High	0	5.224e-09	6.12	73.8
FALSE	High	[E].LTELPVMVELASDFLDR.[N]	E	1xAcetyl:2H(3) [N-Term]	O94808 1xAcetyl:2H(3) [N-Term]; Q06210 1xAcetyl:2H(3) [N-Term]	FALSE	0.000439327	0	1	2	4	Q06210	O94808 [392-408]; Q06210 [409-425]	0	1993.04	0	100	100	100	4.34403e-17	3.7678e-17	4.94188e-17					234.5	35.7	129.7		Not Found	High	High	High	High	0	9.22e-07	3.81	103
FALSE	High	[M].SLKLQASNVTNKNDPKSINSR.[V]	M	1xAcetyl [N-Term]; 3xAcetyl:2H(3) [K3; K12; K16]	Q9UKM9 1xAcetyl [N-Term]; 3xAcetyl:2H(3) [K4; K13; K17]	FALSE	0.00830103	0	1	1	5	Q9UKM9	Q9UKM9 [2-22]	0	2491.35	0	0.824	0.944	0.612	0.983683	0.951719	0.907903	0	0	0	118.4	97.5	111.7	72.4		High	Peak Found	High	High	High	0	0.0001373	4.58	44.73
FALSE	High	[R].SLKSDMMSHLVKIPGIIIAASAVR.[A]	R	2xAcetyl:2H(3) [K3; K12]; 1xAcetyl:2H(3) [N-Term]	P33992 2xAcetyl:2H(3) [K141; K150]; 1xAcetyl:2H(3) [N-Term]	FALSE	0.00194045	0	1	1	1	P33992	P33992 [139-162]	0	2672.52	0	3.984	4.75	3.505	0.104838	0.321025	0.184896	0	0	0	30.2	120.4	143.5	105.9		Peak Found	Peak Found	Peak Found	High	High	0	1.157e-05	4.85	94.19
FALSE	High	[E].ITALAPSTMKIKIIAPPER.[K]	E	2xAcetyl:2H(3) [K10; K12]; 1xAcetyl:2H(3) [N-Term]	P63267 2xAcetyl:2H(3) [K327; K329]; 1xAcetyl:2H(3) [N-Term]; P60709 2xAcetyl:2H(3) [K326; K328]; 1xAcetyl:2H(3) [N-Term]; P62736 2xAcetyl:2H(3) [K328; K330]; 1xAcetyl:2H(3) [N-Term]; P68133 2xAcetyl:2H(3) [K328; K330]; 1xAcetyl:2H(3) [N-Term]; P68032 2xAcetyl:2H(3) [K328; K330]; 1xAcetyl:2H(3) [N-Term]; P63261 2xAcetyl:2H(3) [K326; K328]; 1xAcetyl:2H(3) [N-Term]	FALSE	4.22404e-05	0	2	6	7	P60709; P63261	P63267 [318-336]; P60709 [317-335]; P62736 [319-337]; P68133 [319-337]; P68032 [319-337]; P63261 [317-335]	0	2185.3	0	11.752	14.42	15.093	1.83528e-06	2.78591e-07	1.42782e-09	0	0	0	9.5	111.2	136.5	142.8	Shared	Peak Found	High	High	High	High	0.0008295	0.01422	2.63	71.52
FALSE	High	[E].LVALAQAVNAR.[A]	E	1xAcetyl:2H(3) [N-Term]	P22314 1xAcetyl:2H(3) [N-Term]	FALSE	0.00531714	0	1	1	26	P22314	P22314 [358-368]	0	1170.7	0	36.362	25.904	36.954	3.78048e-12	3.58504e-10	1.08643e-15	0	0	0	4	145.1	103.4	147.5		Peak Found	High	High	High	High	0	0.000517	3.99	66.06
FALSE	High	[-].MEMKKKINLELR.[N]	-	1xAcetyl [N-Term]; 3xAcetyl:2H(3) [K4; K5; K6]	Q9BTT0 1xAcetyl [N-Term]; 3xAcetyl:2H(3) [K4; K5; K6]	FALSE	0.00281697	0	1	1	6	Q9BTT0	Q9BTT0 [1-12]	0	1709.96	0	0.048	0.118	0.076	3.23394e-07	0.000657556	1.7995e-06	0	0	0	322.2	15.3	37.9	24.6		High	Peak Found	Peak Found	Peak Found	High	0	2.178e-05	4.31	66.9
FALSE	High	[R].SKTNKAKTLATWATKELR.[K]	R	4xAcetyl:2H(3) [K2; K5; K7; K15]; 1xAcetyl:2H(3) [N-Term]	Q14974 4xAcetyl:2H(3) [K854; K857; K859; K867]; 1xAcetyl:2H(3) [N-Term]	FALSE	0.000106996	0	1	1	12	Q14974	Q14974 [853-870]	0	2272.31	0	0.673	0.682	0.934	0.915733	0.902282	0.936841	0	0	0	121.6	81.8	83	113.6		High	High	High	High	High	0.002153	0.02931	5.07	74.39
FALSE	High	[R].SKSLKQNINLSAPIMSR.[F]	R	2xAcetyl:2H(3) [K2; K5]; 1xAcetyl:2H(3) [N-Term]	Q14566 2xAcetyl:2H(3) [K514; K517]; 1xAcetyl:2H(3) [N-Term]	FALSE	0.00370834	0	1	1	1	Q14566	Q14566 [513-529]	0	2022.14	0	0.104	0.01	0.208	0.0741547	3.7678e-17	0.249162	0		0	304.9	31.8		63.3		High	Peak Found	Not Found	Peak Found	High	0	3.475e-05	4.06	56.75
FALSE	High	[-I].MNQEKLAKLQAQVR.[I]	-	1xAcetyl [N-Term]; 2xAcetyl:2H(3) [K5; K8]	Q96K17 1xAcetyl [N-Term]; 2xAcetyl:2H(3) [K5; K8]; P20290 1xAcetyl [N-Term]; 2xAcetyl:2H(3) [K54; K57]	FALSE	0.00102138	0	1	2	20	P20290	Q96K17 [1-14]; P20290 [50-63]	0	1788.99	0	0.675	0.687	0.649	0.91679	0.906404	0.896046	0	0	0	132.8	89.7	91.2	86.2		High	High	High	High	High	0	6.533e-06	4.97	53.71
FALSE	High	[-].MNNQKQQKPTLSGQR.[F]	-	1xAcetyl [N-Term]; 2xAcetyl:2H(3) [K5; K8]	Q7L1Q6 1xAcetyl [N-Term]; 2xAcetyl:2H(3) [K5; K8]	FALSE	0.00955031	0	1	1	6	Q7L1Q6	Q7L1Q6 [1-15]	0	1889.98	0	1.213	0.888	0.966	0.751166	0.976055	0.919342	0	0	0	98.4	119.3	87.3	95		Peak Found	High	High	High	High	6.911e-05	0.001971	3.69	30.76
FALSE	High	[R].SHSAHFFEFLTKELALGQDR.[IF]	R	1xAcetyl:2H(3) [K12]; 1xAcetyl:2H(3) [N-Term]	P30046 1xAcetyl:2H(3) [K87]; 1xAcetyl:2H(3) [N-Term]; A6NHG4 1xAcetyl:2H(3) [K87]; 1xAcetyl:2H(3) [N-Term]	FALSE	7.32362e-05	0	1	2	4	A6NHG4	P30046 [76-95]; A6NHG4 [76-95]	0	2423.23	0	0.01	1.109	1.323	4.34403e-17	0.890526	0.827616		0	0	116.5		129.3	154.2		High	Not Found	High	Peak Found	High	0	1.66e-07	6.04	69.2
FALSE	High	[-].MNINDLKLTLSKAGQEHLLR.[F]	-	1xAcetyl [N-Term]; 2xAcetyl:2H(3) [K7; K12]	Q16222 1xAcetyl [N-Term]; 2xAcetyl:2H(3) [K7; K12]	FALSE	0.00250821	0	1	1	5	Q16222	Q16222 [1-20]	0	2426.33	0	0.677	0.902	0.749	0.95226	0.961244	0.985609	0	0	0	120.2	81.3	108.4	90.1		High	High	High	High	High	0	4.168e-05	3.14	72.49
FALSE	High	[-].MNIMDFNVKKLAADAGTFLSR.[A]	-	1xAcetyl [N-Term]; 2xAcetyl:2H(3) [K9; K10]	Q9Y371 1xAcetyl [N-Term]; 2xAcetyl:2H(3) [K9; K10]	FALSE	8.20438e-06	0	1	1	25	Q9Y371	Q9Y371 [1-21]	0	2474.27	0	0.513	0.409	0.46	0.880475	0.764024	0.713415	0	0	0	168	86.1	68.7	77.2		High	High	High	High	High	0	1.499e-06	4.32	100.16
FALSE	High	[-].MNKHQKPVLTGQR.[F]	-	1xAcetyl [N-Term]; 2xAcetyl:2H(3) [K3; K6]	Q9Y6E2 1xAcetyl [N-Term]; 2xAcetyl:2H(3) [K3; K6]	FALSE	0.00104666	0	1	1	6	Q9Y6E2	Q9Y6E2 [1-13]	0	1668.91	0	0.807	0.637	0.81	0.994056	0.847342	0.99558	0	0	0	122.9	99.2	78.3	99.6		Peak Found	High	High	High	High	0	4.04e-06	4.54	31.02
FALSE	High	[M].SKAHPPELKKFMDKKLSLKLNGGR.[H]	M	1xAcetyl [N-Term]; 6xAcetyl:2H(3) [K2; K9; K10; K14; K15; K19]	P62308 1xAcetyl [N-Term]; 6xAcetyl:2H(3) [K3; K10; K11; K15; K16; K20]	FALSE	0.000235468	0	1	1	7	P62308	P62308 [2-25]	0	3034.74	0	0.01	0.163	0.421	4.34403e-17	0.500814	0.768141		0	0	252.5		41.3	106.2		High	Not Found	Peak Found	Peak Found	High	0	3.186e-07	5.13	73.14
FALSE	High	[-].MNGTLDHPDQPDLDAIKMFVGQVPR.[T]	-	1xAcetyl [N-Term]; 1xAcetyl:2H(3) [K17]	Q92879 1xAcetyl [N-Term]; 1xAcetyl:2H(3) [K17]	FALSE	0.0209226	0	1	1	1	Q92879	Q92879 [1-25]	0	2881.41	0	0.076	0.01	1.23	0.0293532	3.7678e-17	0.852495	0		0	173.5	13.1		213.4		Peak Found	Peak Found	Not Found	High	High	0	0.0006697	3.2	73.16
FALSE	High	[E].MNGKELNGKQIYVGR.[A]	E	2xAcetyl:2H(3) [K4; K9]; 1xAcetyl:2H(3) [N-Term]	Q9H361 2xAcetyl:2H(3) [K254; K259]; 1xAcetyl:2H(3) [N-Term]; P11940 2xAcetyl:2H(3) [K254; K259]; 1xAcetyl:2H(3) [N-Term]	FALSE	0.00177048	0	1	2	4	P11940	Q9H361 [251-265]; P11940 [251-265]	0	1841.99	0	100	100	100	4.34403e-17	3.7678e-17	4.94188e-17					238.2	16.9	145		Not Found	High	High	High	High	0	2.652e-05	4.7	47.86
FALSE	High	[E].MNEPVQLTFALR.[Y]	E	1xAcetyl:2H(3) [N-Term]	P12004 1xAcetyl:2H(3) [N-Term]	FALSE	0.0205455	0	1	1	9	P12004	P12004 [199-210]	0	1463.78	0	100	100	100	4.34403e-17	3.7678e-17	4.94188e-17					62.3	151.8	185.9		Not Found	High	High	High	High	0	0.0008163	3.72	63.32
FALSE	High	[R].SKDKGATKESSEKDR.[G]	R	4xAcetyl:2H(3) [K2; K4; K8; K13]	Q15287 4xAcetyl:2H(3) [K44; K46; K50; K55]	FALSE	0.000182138	0	1	1	1	Q15287	Q15287 [43-57]	0	1845.96	0	0.35	0.269	1.153	0.771255	0.791174	0.909807	0	0	0	144.3	50.5	38.8	166.4		Peak Found	Peak Found	Peak Found	High	High	0	2.066e-07	5.34	19.67
FALSE	High	[-].MNAGSDPVVIVSAAR.[T]	-	1xAcetyl [N-Term]	Q9BWD1 1xAcetyl [N-Term]	FALSE	0.000235468	0	1	1	10	Q9BWD1	Q9BWD1 [1-15]	0	1528.78	0	0.879	0.889	0.824	0.970903	0.976055	0.991092	0	0	0	111.4	97.9	99	91.7		High	Peak Found	High	High	High	0	3.186e-07	3.71	48.32
FALSE	High	[-].MMGHRPVLVLSQNTKR.[E]	-	1xAcetyl [N-Term]; 1xOxidation [M2]; 1xAcetyl:2H(3) [K15]	P49368 1xAcetyl [N-Term]; 1xOxidation [M2]; 1xAcetyl:2H(3) [K15]	FALSE	0.000103142	0	1	1	1	P49368	P49368 [1-16]	0	1970.05	0	0.677	0.287	0.654	0.988621	0.77294	0.963814	0	0	0	152.8	103.4	43.8	100		High	Peak Found	Peak Found	Peak Found	High	0	7.847e-08	4.26	34.7
FALSE	High	[-].MMGHRPVLVLSQNTKR.[E]	-	1xAcetyl [N-Term]; 1xAcetyl:2H(3) [K15]	P49368 1xAcetyl [N-Term]; 1xAcetyl:2H(3) [K15]	FALSE	0.000239827	0	1	1	20	P49368	P49368 [1-16]	0	1954.06	0	0.494	0.389	0.74	0.626071	0.300209	0.969944	0	0	0	152.5	75.4	59.3	112.8		High	High	High	High	High	0	6.696e-07	4.63	40.99
FALSE	High	[-].MMCGAPSATQPATAETQHIADQVR.[S]	-	1xAcetyl [N-Term]; 1xCarbamidomethyl [C3]; 1xOxidation [M2]	P04080 1xAcetyl [N-Term]; 1xCarbamidomethyl [C3]; 1xOxidation [M2]	FALSE	0.00151036	0	1	1	2	P04080	P04080 [1-24]	0	2629.18	0	0.584	0.35	1.119	0.982898	0.888427	0.90318	0	0	0	131	76.5	45.8	146.7		High	Peak Found	Peak Found	Peak Found	High	0	7.565e-06	3.78	40.76
FALSE	High	[-].MMCGAPSATQPATAETQHIADQVR.[S]	-	1xAcetyl [N-Term]; 1xCarbamidomethyl [C3]	P04080 1xAcetyl [N-Term]; 1xCarbamidomethyl [C3]	FALSE	0.000159213	0	1	1	4	P04080	P04080 [1-24]	0	2613.19	0	0.794	0.429	0.905	0.973466	0.919904	0.962942	0	0	0	127.9	101.6	54.8	115.7		High	Peak Found	Peak Found	Peak Found	High	0	1.639e-07	5.17	45.02
FALSE	High	[-].MLWFQGAIPAAIATAKR.[S]	-	1xAcetyl:2H(3) [K16]; 1xAcetyl:2H(3) [N-Term]	Q92575 1xAcetyl:2H(3) [K16]; 1xAcetyl:2H(3) [N-Term]	FALSE	0.000203329	0	1	1	17	Q92575	Q92575 [1-17]	0	1935.08	0	0.363	0.737	0.586	0.737685	0.990565	0.931908	0	0	0	149	54	109.8	87.3		High	High	High	High	High	0	5.681e-05	4.01	83.52
FALSE	High	[-].MLVLVLGDLHIPHR.[C]	-	1xAcetyl:2H(3) [N-Term]	Q9UBQ0 1xAcetyl:2H(3) [N-Term]	FALSE	0.000819623	0	1	1	45	Q9UBQ0	Q9UBQ0 [1-14]	0	1657.96	0	0.983	1.387	0.742	0.915733	0.828713	0.991092	0	0	0	97.3	95.6	135	72.2		High	High	High	High	High	0	3.621e-05	3.48	79.24
FALSE	High	[-].MLTKFETKSAR.[V]	-	2xAcetyl:2H(3) [K4; K8]; 1xAcetyl:2H(3) [N-Term]	P53621 2xAcetyl:2H(3) [K4; K8]; 1xAcetyl:2H(3) [N-Term]	FALSE	0.0243445	0	1	1	3	P53621	P53621 [1-11]	0	1446.8	0	0.481	0.094	0.523	0.678412	0.0103822	0.71498	0	0	0	190.6	91.8	17.9	99.7		High	Peak Found	High	High	High	0	0.0008641	3.14	58.58
FALSE	High	[-].MISAAQLLDELMGR.[D]	-	1xAcetyl [N-Term]	O95232 1xAcetyl [N-Term]	FALSE	0.00308733	0	1	1	22	O95232	O95232 [1-14]	0	1589.8	0	0.939	0.903	0.774	0.932796	0.965822	0.987852	0	0	0	110.6	103.9	99.9	85.6		High	High	High	High	High	0	0.0001185	2.91	93.32
FALSE	High	[E].MIQLQEELAAAER.[A]	E	1xAcetyl:2H(3) [N-Term]	P35579 1xAcetyl:2H(3) [N-Term]	FALSE	0.0226378	0	1	1	1	P35579	P35579 [1682-1694]	0	1546.8	0	100	100	100	4.34403e-17	3.7678e-17	4.94188e-17					100.9	166.1	133		Not Found	Peak Found	High	Peak Found	High	0	0.0007621	2.82	66.77
FALSE	High	[F].SKDIVENYFMR.[D]	F	1xAcetyl:2H(3) [K2]; 1xAcetyl:2H(3) [N-Term]	Q13263 1xAcetyl:2H(3) [K127]; 1xAcetyl:2H(3) [N-Term]	FALSE	0.0260206	0	1	1	1	Q13263	Q13263 [126-136]	0	1491.74	0	0.01	0.01	0.01	4.34403e-17	3.7678e-17	4.94188e-17				400					High	Not Found	Not Found	Not Found	High	0	0.0009762	2.18	63.4
FALSE	High	[R].SKESVPEFPLSPPKKKDLSLEEIQKKLEAAEER.[R]	R	6xAcetyl:2H(3) [K2; K14; K15; K16; K25; K26]	P16949 6xAcetyl:2H(3) [K29; K41; K42; K43; K52; K53]	FALSE	0.0196915	0	1	1	2	P16949	P16949 [28-60]	0	4050.22	0														No Quan Values	High	Not Found	Not Found	Not Found	High	0.001843	0.02603	2.36
FALSE	High	[R].MNVLADALKSINNAEKR.[G]	R	2xAcetyl:2H(3) [K9; K16]	P62244 2xAcetyl:2H(3) [K12; K19]	FALSE	2.89125e-05	0	1	1	7	P62244	P62244 [4-20]	0	1977.07	0	0.01	0.256	0.879	4.34403e-17	0.784657	0.985609		0	0	187.4		47.9	164.7		High	Not Found	Peak Found	Peak Found	High	0	3.586e-08	5.57	65.78
FALSE	High	[R].MNVLADALKSINNAEKR.[G]	R	2xAcetyl:2H(3) [K9; K16]; 1xAcetyl:2H(3) [N-Term]	P62244 2xAcetyl:2H(3) [K12; K19]; 1xAcetyl:2H(3) [N-Term]	FALSE	0.000630155	0	1	1	4	P62244	P62244 [4-20]	0	2022.1	0	0.057	0.451	0.276	0.0498061	0.954008	0.426671	0	0	0	224.2	12.8	101.1	61.9		High	Peak Found	Peak Found	Peak Found	High	0	1.714e-06	3.68	86.46
FALSE	High	[R].SHPLDPIDTVDFERE.[C]	R	1xAcetyl:2H(3) [N-Term]	P47897 1xAcetyl:2H(3) [N-Term]	FALSE	0.0129489	0	1	1	1	P47897	P47897 [96-110]	1	1814.86	0	100	100	100	4.34403e-17	3.7678e-17	4.94188e-17					132.3	93.7	173.9		Not Found	Peak Found	High	Peak Found	High	0	0.0002944	3.2	49.94
FALSE	High	[-].MPMFIVNTNVPR.[A]	-	1xAcetyl:2H(3) [N-Term]	P14174 1xAcetyl:2H(3) [N-Term]	FALSE	0.00855797	0	1	1	12	P14174	P14174 [1-12]	0	1463.76	0	0.686	0.758	0.704	0.926333	0.95794	0.947139	0	0	0	127.1	87.2	96.3	89.4		High	High	High	Peak Found	High	0	0.0001451	3.19	66.33
FALSE	High	[R].SGVNSELVKR.[I]	R	1xAcetyl:2H(3) [K9]; 1xAcetyl:2H(3) [N-Term]	P35659 1xAcetyl:2H(3) [K177]; 1xAcetyl:2H(3) [N-Term]	FALSE	0.0220957	0	1	1	24	P35659	P35659 [169-178]	0	1178.66	0	1.187	0.842	0.973	0.772664	0.99998	0.914627	0	0	0	100	118.6	84.2	97.3		Peak Found	High	High	High	High	0.001963	0.02664	3.17	32.32
FALSE	High	[R].SGVSLAALKKALAAAGYDVEKNNSR.[I]	R	3xAcetyl:2H(3) [K9; K10; K21]; 1xAcetyl:2H(3) [N-Term]	P16402 3xAcetyl:2H(3) [K64; K65; K76]; 1xAcetyl:2H(3) [N-Term]; P10412 3xAcetyl:2H(3) [K63; K64; K75]; 1xAcetyl:2H(3) [N-Term]; P16403 3xAcetyl:2H(3) [K63; K64; K75]; 1xAcetyl:2H(3) [N-Term]	FALSE	4.07549e-07	0	3	3	73	P16402; P10412; P16403	P16402 [56-80]; P10412 [55-79]; P16403 [55-79]	0	2713.49	0	0.852	0.956	0.845	0.982898	0.94872	0.98567	0	0	0	109.5	93.3	104.7	92.5	Shared	High	High	High	High	High	0	6.636e-12	8.1	82.31
FALSE	High	[-].MVLLESEQFLTELTR.[L]	-	1xAcetyl:2H(3) [N-Term]	P37108 1xAcetyl:2H(3) [N-Term]	FALSE	0.000106996	0	1	1	30	P37108	P37108 [1-15]	0	1853.98	0	0.496	0.852	0.946	0.915733	0.964539	0.985099	0	0	0	121.4	60.3	103.4	114.9		High	High	High	High	High	0	2.278e-07	3.82	101.43
FALSE	High	[-].MVKLSKEAKQR.[L]	-	3xAcetyl:2H(3) [K3; K6; K9]; 1xAcetyl:2H(3) [N-Term]	Q9P0U1 3xAcetyl:2H(3) [K3; K6; K9]; 1xAcetyl:2H(3) [N-Term]	FALSE	0.0266579	0	1	1	2	Q9P0U1	Q9P0U1 [1-11]	0	1497.88	0	1.099	0.825	1.091	0.843157	0.99776	0.872352	0	0	0	99.6	109.5	82.2	108.7		High	Peak Found	Peak Found	High	High	0.0001879	0.003283	3.72	47.42
FALSE	High	[-].MVKLFIGNLPR.[E]	-	1xAcetyl [N-Term]; 1xAcetyl:2H(3) [K3]	Q9BQ04 1xAcetyl [N-Term]; 1xAcetyl:2H(3) [K3]; Q9BWF3 1xAcetyl [N-Term]; 1xAcetyl:2H(3) [K3]	FALSE	0.0226378	0	1	2	2	Q9BWF3	Q9BQ04 [1-11]; Q9BWF3 [1-11]	0	1374.8	0	0.486	0.603	0.502	0.895407	0.980181	0.872352	0	0	0	154.4	75.1	93.1	77.5		High	Peak Found	Peak Found	Peak Found	High	0	0.000765	3.35	81.75
FALSE	High	[VE].MVHFDLPGQEER.[AE]	V	1xAcetyl:2H(3) [N-Term]	Q5T2N8 1xAcetyl:2H(3) [N-Term]; Q9NVI7 1xAcetyl:2H(3) [N-Term]	FALSE	0.0230531	0	1	2	1	Q9NVI7	Q5T2N8 [295-306]; Q9NVI7 [518-529]	0	1502.71	0	100	100	100	4.34403e-17	3.7678e-17	4.94188e-17					116.4	103	180.6		Not Found	High	Peak Found	Peak Found	High	0	0.0007933	3.85	50.41
FALSE	High	[-].MVGQLSEGAIAAIMQKGDTNIKPILQVINIRPITTGNSPPR.[Y]	-	1xAcetyl [N-Term]; 2xAcetyl:2H(3) [K16; K22]	P27694 1xAcetyl [N-Term]; 2xAcetyl:2H(3) [K16; K22]	FALSE	0.00548197	0	1	1	1	P27694	P27694 [1-41]	0	4474.44	0	8.411	9.266	2.072	0.0304523	0.123953	0.542793	0	0	0	19.3	162.1	178.6	39.9		Peak Found	High	Peak Found	Peak Found	High	0	6.761e-05	4.04	94.22
FALSE	High	[E].MVGIIYKPKTKETR.[E]	E	3xAcetyl:2H(3) [K7; K9; K11]; 1xAcetyl:2H(3) [N-Term]	O75643 3xAcetyl:2H(3) [K103; K105; K107]; 1xAcetyl:2H(3) [N-Term]	FALSE	0.0135121	0	1	1	2	O75643	O75643 [97-110]	0	1844.07	0	100	100	100	4.34403e-17	3.7678e-17	4.94188e-17					174.5	105.2	120.2		Not Found	High	Peak Found	Peak Found	High	0	0.0003155	3.42	57.89
FALSE	High	[-].MVGGEAAAAVEELVSGVR.[Q]	-	1xAcetyl [N-Term]	Q96HQ2 1xAcetyl [N-Term]	FALSE	0.000271025	0	1	1	18	Q96HQ2	Q96HQ2 [1-18]	0	1786.9	0	0.278	0.664	0.598	0.496337	0.964539	0.926734	0	0	0	157.5	43.7	104.6	94.2		High	High	High	High	High	0	4.698e-05	4.21	83.59
FALSE	High	[E].MVESMKKVAGMDVELTVEER.[N]	E	2xAcetyl:2H(3) [K6; K7]; 1xAcetyl:2H(3) [N-Term]	P62258 2xAcetyl:2H(3) [K28; K29]; 1xAcetyl:2H(3) [N-Term]	FALSE	0.0204213	0	1	1	7	P62258	P62258 [23-42]	0	2416.21	0		100			3.7678e-17							400			Not Found	Not Found	High	High	High	0	0.0006425	3.97	82.38
FALSE	High	[R].SGYLLPDTKAYGDR.[I]	R	1xAcetyl:2H(3) [K9]; 1xAcetyl:2H(3) [N-Term]	P14625 1xAcetyl:2H(3) [K733]; 1xAcetyl:2H(3) [N-Term]	FALSE	0.0104642	0	1	1	3	P14625	P14625 [725-738]	0	1645.83	0	0.072	0.01	0.136	0.0237554	3.7678e-17	0.108665	0		0	331.2	23.8		45		High	Peak Found	Not Found	Peak Found	High	0	0.0002053	2.02	51.05
FALSE	High	[E].MLMAHAVTQLANR.[T]	E	1xAcetyl:2H(3) [N-Term]	P78371 1xAcetyl:2H(3) [N-Term]	FALSE	0.000903842	0	1	1	7	P78371	P78371 [415-427]	0	1500.79	0	36.058	31.427	44.191	4.11208e-06	0.00236672	1.18367e-09	0	0	0	3.6	128	111.6	156.9		Peak Found	High	High	High	High	0	2.94e-05	5.09	57.7
FALSE	High	[E].MTEAEQQQLIDDHFLFDKPVSPLLTAAGMAR.[D]	E	1xAcetyl:2H(3) [K18]; 1xAcetyl:2H(3) [N-Term]	P12532 1xAcetyl:2H(3) [K229]; 1xAcetyl:2H(3) [N-Term]	FALSE	0.00332218	0	1	1	16	P12532	P12532 [212-242]	0	3562.78	0	100	100	100	4.34403e-17	3.7678e-17	4.94188e-17					152.1	183.3	64.6		Not Found	High	High	High	High	0	2.894e-05	4.75	75.71
FALSE	High	[E].MQSSESKDTSLETR.[R]	E	1xAcetyl:2H(3) [K7]; 1xAcetyl:2H(3) [N-Term]	P31939 1xAcetyl:2H(3) [K164]; 1xAcetyl:2H(3) [N-Term]	FALSE	0.00279981	0	1	1	8	P31939	P31939 [158-171]	0	1688.79	0	100	100	100	4.34403e-17	3.7678e-17	4.94188e-17					174	82.7	143.3		Not Found	High	High	High	High	0.0001879	0.003043	3.35	31.75
FALSE	High	[R].SHKDEVVKIQSLAR.[M]	R	2xAcetyl:2H(3) [K3; K8]; 1xAcetyl:2H(3) [N-Term]	P46940 2xAcetyl:2H(3) [K806; K811]; 1xAcetyl:2H(3) [N-Term]	FALSE	0.0112575	0	1	1	2	P46940	P46940 [804-817]	0	1744.99	0	0.01	0.01	0.01	4.34403e-17	3.7678e-17	4.94188e-17				400					High	Not Found	Not Found	High	High	0	0.0002314	4.21	45.39
FALSE	High	[R].SHMMDVQGSTQDSAIKDFVLKYALPLVGHR.[K]	R	2xAcetyl:2H(3) [K16; K21]; 1xAcetyl:2H(3) [N-Term]	P13667 2xAcetyl:2H(3) [K386; K391]; 1xAcetyl:2H(3) [N-Term]	FALSE	2.20923e-05	0	1	1	1	P13667	P13667 [371-400]	0	3478.78	0	0.01	0.01	0.154	4.34403e-17	3.7678e-17	0.094684			0	346.6			53.4		High	Not Found	Not Found	Peak Found	High	0	5.715e-09	5.88	82.51
FALSE	High	[-].MQPASAKWYDR.[R]	-	1xAcetyl [N-Term]; 1xAcetyl:2H(3) [K7]	Q15185 1xAcetyl [N-Term]; 1xAcetyl:2H(3) [K7]	FALSE	0.0174408	0	1	1	14	Q15185	Q15185 [1-11]	0	1439.68	0	1.569	0.939	1.959	0.443358	0.95794	0.148827	0	0	0	73.2	114.8	68.7	143.3		High	High	High	High	High	0.0002176	0.003895	2.74	45.93
FALSE	High	[-].MQNDAGEFVDLYVPR.[K]	-	1xAcetyl [N-Term]	P63220 1xAcetyl [N-Term]	FALSE	0.00182541	0	1	1	57	P63220	P63220 [1-15]	0	1795.83	0	0.955	0.9	1.159	0.91679	0.964274	0.852769	0	0	0	99.7	95.1	89.7	115.5		High	High	High	High	High	0	4.475e-05	2.59	63.53
FALSE	High	[-].MQLKPMEINPEMLNKVLSR.[L]	-	1xOxidation [M6]; 2xAcetyl:2H(3) [K4; K15]; 1xAcetyl:2H(3) [N-Term]	P09936 1xOxidation [M6]; 2xAcetyl:2H(3) [K4; K15]; 1xAcetyl:2H(3) [N-Term]	FALSE	0.0159222	0	1	1	1	P09936	P09936 [1-19]	0	2422.29	0	0.43	0.118	0.356	0.836014	0.390893	0.650592	0	0	0	210.1	90.3	24.8	74.8		High	Peak Found	Peak Found	Peak Found	High	0	0.0004203	2.72	72.35
FALSE	High	[-].MQLKPMEINPEMLNKVLSR.[L]	-	2xAcetyl:2H(3) [K4; K15]; 1xAcetyl:2H(3) [N-Term]	P09936 2xAcetyl:2H(3) [K4; K15]; 1xAcetyl:2H(3) [N-Term]	FALSE	0.000149769	0	1	1	15	P09936	P09936 [1-19]	0	2406.29	0	0.497	0.699	0.493	0.632066	0.919228	0.585652	0	0	0	148.8	73.9	104	73.3		High	High	High	High	High	0	1.489e-07	3.85	77.77
FALSE	High	[E].MQLKEAKHIAEEADRKYEEVAR.[K]	E	3xAcetyl:2H(3) [K4; K7; K16]; 1xAcetyl:2H(3) [N-Term]	P67936 3xAcetyl:2H(3) [K113; K116; K125]; 1xAcetyl:2H(3) [N-Term]	FALSE	0.00156677	0	1	1	1	P67936	P67936 [110-131]	1	2824.47	0		100	100		3.7678e-17	4.94188e-17						143.9	256.1		Not Found	Not Found	High	Peak Found	High	0	8.082e-06	4.36	68.95
FALSE	High	[E].MQKLQAEAPHIVVGTPGR.[V]	E	1xAcetyl:2H(3) [K3]; 1xAcetyl:2H(3) [N-Term]	Q14240 1xAcetyl:2H(3) [K147]; 1xAcetyl:2H(3) [N-Term]	FALSE	1.80555e-05	0	1	1	4	Q14240	Q14240 [145-162]	0	2022.11	0	39.833	36.637	26.405	3.36852e-08	0.000116027	1.51489e-06	0	0	0	3.9	153.4	141.1	101.7		Peak Found	Peak Found	High	High	High	0	4.053e-09	6.15	52.3
FALSE	High	[-].MQFMLLFSR.[Q]	-	1xAcetyl:2H(3) [N-Term]	P56377 1xAcetyl:2H(3) [N-Term]	FALSE	0.0234758	0	1	1	6	P56377	P56377 [1-9]	0	1217.62	0	0.567	0.465	0.434	0.976309	0.95367	0.749699	0	0	0	162.2	92	75.4	70.3		High	Peak Found	Peak Found	High	High	0.0002176	0.005815	3.19	86.37
FALSE	High	[-].MQAFLKGTSISTKPPLTKDR.[G]	-	1xAcetyl [N-Term]; 3xAcetyl:2H(3) [K6; K13; K18]	P35249 1xAcetyl [N-Term]; 3xAcetyl:2H(3) [K6; K13; K18]	FALSE	0.0302654	0	1	1	2	P35249	P35249 [1-20]	0	2396.32	0	0.464	0.846	0.546	0.839147	0.983644	0.847661	0	0	0	140.1	65	118.4	76.5		Peak Found	Peak Found	High	High	High	0.0001346	0.002564	2.97	66.5
FALSE	High	[E].MSEVLTEILR.[V]	E	1xAcetyl:2H(3) [N-Term]	O43615 1xAcetyl:2H(3) [N-Term]	FALSE	0.00845426	0	1	1	20	O43615	O43615 [296-305]	0	1235.67	0	28.703	25.176	20.389	6.35244e-05	0.0147541	0.000772767	0	0	0	5.3	152.5	133.8	108.4		Peak Found	High	High	High	High	0	0.0007971	3.15	79.57
FALSE	High	[R].SGTVDPQELQKALTTMGFR.[L]	R	1xAcetyl:2H(3) [K11]; 1xAcetyl:2H(3) [N-Term]	P30626 1xAcetyl:2H(3) [K127]; 1xAcetyl:2H(3) [N-Term]	FALSE	0.00739279	0	1	1	3	P30626	P30626 [117-135]	0	2169.11	0	0.638	0.734	0.588	0.964291	0.987997	0.888954	0	0	0	135.2	86.2	99.2	79.4		High	Peak Found	Peak Found	Peak Found	High	6.911e-05	0.001402	3.28	74.12
FALSE	High	[R].SKGAVAIADAIR.[G]	R	1xAcetyl:2H(3) [K2]; 1xAcetyl:2H(3) [N-Term]	P46060 1xAcetyl:2H(3) [K279]; 1xAcetyl:2H(3) [N-Term]	FALSE	0.0288376	0	1	1	3	P46060	P46060 [278-289]	0	1261.74	0	5.248	4.299	5.762	0.0482719	0.319682	0.0496864	0	0	0	24.5	128.7	105.4	141.3		Peak Found	High	High	Peak Found	High	0	0.001155	3.41	51.92
FALSE	High	[G].SKKAVTKAQKKDGKKR.[K]	G	7xAcetyl:2H(3) [K2; K3; K7; K10; K11; K14; K15]	Q16778 7xAcetyl:2H(3) [K16; K17; K21; K24; K25; K28; K29]; Q6DN03 7xAcetyl:2H(3) [K16; K17; K21; K24; K25; K28; K29]; P58876 7xAcetyl:2H(3) [K16; K17; K21; K24; K25; K28; K29]; Q93079 7xAcetyl:2H(3) [K16; K17; K21; K24; K25; K28; K29]; O60814 7xAcetyl:2H(3) [K16; K17; K21; K24; K25; K28; K29]; Q99880 7xAcetyl:2H(3) [K16; K17; K21; K24; K25; K28; K29]; Q6DRA6 7xAcetyl:2H(3) [K16; K17; K21; K24; K2…	FALSE	0.000381693	0	7	12	2	Q6DN03; P58876; O60814; Q99880; Q8N257; P23527; Q99877	Q16778 [15-30]; Q6DN03 [15-30]; P58876 [15-30]; Q93079 [15-30]; O60814 [15-30]; Q99880 [15-30]; Q6DRA6 [15-30]; P62807 [15-30]; Q8N257 [15-30]; P06899 [15-30]; P23527 [15-30]; Q99877 [15-30]	0	2116.32	0	1.937	0.01	0.01	0.527793	3.7678e-17	4.94188e-17	0			136.2	263.8			Shared	Peak Found	High	Not Found	Not Found	High	0	2.417e-06	4.02	29.82
FALSE	High	[R].SKMSQVAPSLSALIGEAVGAR.[L]	R	1xAcetyl:2H(3) [K2]; 1xAcetyl:2H(3) [N-Term]	O00567 1xAcetyl:2H(3) [K288]; 1xAcetyl:2H(3) [N-Term]	FALSE	0.000819623	0	1	1	2	O00567	O00567 [287-307]	0	2162.18	0	0.405	0.332	0.562	0.786305	0.766399	0.892646	0	0	0	173.9	70.4	57.8	97.8		Peak Found	Peak Found	Peak Found	High	High	0	4.657e-06	4.89	81.51
FALSE	High	[E].MGPPDPILGVTEAFKR.[D]	E	1xAcetyl:2H(3) [K15]; 1xAcetyl:2H(3) [N-Term]	P00505 1xAcetyl:2H(3) [K52]; 1xAcetyl:2H(3) [N-Term]	FALSE	0.0116763	0	1	1	2	P00505	P00505 [38-53]	0	1817.97	0	9.173	13.023	10.481	0.00912196	0.0724997	0.00850919	0	0	0	11.9	109	154.7	124.5		Peak Found	Peak Found	Peak Found	High	High	0	0.0002458	3.14	73.21
FALSE	High	[E].MGPFKHTVDDGLDIR.[K]	E	1xAcetyl:2H(3) [K5]; 1xAcetyl:2H(3) [N-Term]	Q86VP6 1xAcetyl:2H(3) [K1072]; 1xAcetyl:2H(3) [N-Term]	FALSE	0.0055833	0	1	1	4	Q86VP6	Q86VP6 [1068-1082]	0	1790.9	0	100	100	100	4.34403e-17	3.7678e-17	4.94188e-17					115.7	95.4	188.9		Not Found	Peak Found	Peak Found	High	High	0	6.979e-05	4.65	58.89
FALSE	High	[E].MGGTEKQDELGER.[G]	E	1xAcetyl:2H(3) [K6]; 1xAcetyl:2H(3) [N-Term]	Q15393 1xAcetyl:2H(3) [K650]; 1xAcetyl:2H(3) [N-Term]	FALSE	0.0244924	0	1	1	25	Q15393	Q15393 [645-657]	0	1539.72	0	100	100	100	4.34403e-17	3.7678e-17	4.94188e-17					126.2	122.9	150.9		Not Found	High	High	High	High	0	0.001315	1.75	34.05
FALSE	High	[R].MGESDDSILR.[L]	R			FALSE	0.0241975	0	1	1	3	P63220	P63220 [62-71]	0	1122.51	0	0.555	0.319	0.572	0.760035	0.153508	0.776066	0	0	0	163.5	90.7	52.2	93.6		High	Peak Found	Peak Found	Peak Found	High	0	0.0008572	3.74	29.04
FALSE	High	[F].SKNIKLGIHEDSQNR.[K]	F	2xAcetyl:2H(3) [K2; K5]; 1xAcetyl:2H(3) [N-Term]	P07900 2xAcetyl:2H(3) [K443; K446]; 1xAcetyl:2H(3) [N-Term]	FALSE	0.000142619	0	1	1	2	P07900	P07900 [442-456]	0	1874.01	0	0.314	0.045	0.445	0.596364	0.115867	0.769998	0	0	0	221.7	69.7	10	98.6		High	Peak Found	Peak Found	High	High	0	1.358e-07	5.6	37.11
FALSE	High	[F].SKNLKLGIHEDSTNR.[R]	F	2xAcetyl:2H(3) [K2; K5]; 1xAcetyl:2H(3) [N-Term]	P08238 2xAcetyl:2H(3) [K435; K438]; 1xAcetyl:2H(3) [N-Term]	FALSE	0.000169252	0	1	1	1	P08238	P08238 [434-448]	0	1847	0	0.38	0.037	0.495	0.590939	0.00265607	0.736561	0	0	0	209.2	79.5	7.8	103.5		Peak Found	High	Peak Found	Peak Found	High	0	1.827e-07	5.83	37.87
FALSE	High	[-].MFSALKKLVGSDQAPGR.[D]	-	1xAcetyl [N-Term]; 2xAcetyl:2H(3) [K6; K7]	Q3YEC7 1xAcetyl [N-Term]; 2xAcetyl:2H(3) [K6; K7]	FALSE	4.32863e-05	0	1	1	17	Q3YEC7	Q3YEC7 [1-17]	0	1937.04	0	2.192	4.617	2.961	0.433188	0.280117	0.215329	0	0	0	37.1	81.4	171.5	110		Peak Found	High	High	Peak Found	High	0	1.79e-08	4.49	82.07
FALSE	High	[R].MFNGEKINYTEGR.[A]	R	1xAcetyl:2H(3) [K6]	P06744 1xAcetyl:2H(3) [K89]	FALSE	0.0213066	0	1	1	5	P06744	P06744 [84-96]	0	1603.76	0	0.994	0.26	1.613	0.886141	0.793517	0.66946	0	0	0	103.5	102.8	26.8	166.9		Peak Found	High	Peak Found	High	High	0	0.0006882	3.22	36.08
FALSE	High	[M].SKPHSEAGTAFIQTQQLHAAMADTFLEHMCR.[L]	M	1xAcetyl [N-Term]; 1xCarbamidomethyl [C30]; 1xAcetyl:2H(3) [K2]	P14618 1xAcetyl [N-Term]; 1xCarbamidomethyl [C31]; 1xAcetyl:2H(3) [K3]	FALSE	2.29983e-06	0	1	1	2	P14618	P14618 [2-32]	0	3600.69	0	0.02	0.01	0.456	9.4656e-05	3.7678e-17	0.707938	0		0	271	5.5		123.4		Peak Found	Peak Found	Not Found	High	High	0	4.012e-10	6.92	60.54
FALSE	High	[P].MFIVNTNVPR.[A]	P	1xAcetyl:2H(3) [N-Term]	P14174 1xAcetyl:2H(3) [N-Term]	FALSE	0.0299021	0	1	1	23	P14174	P14174 [3-12]	0	1235.66	0	0.847	0.861	0.837	0.960927	0.976288	0.987852	0	0	0	112.8	95.6	97.2	94.4		Peak Found	High	High	High	High	0.003675	0.0431	3.13	57.82
FALSE	High	[-].MFEEKASSPSGKMGGEEKPIGAGEEKQKEGGKKKNKEGSGDGGR.[A]	-	1xAcetyl [N-Term]; 9xAcetyl:2H(3) [K5; K12; K18; K26; K28; K32; K33; K34; K36]	P26639 1xAcetyl [N-Term]; 9xAcetyl:2H(3) [K5; K12; K18; K26; K28; K32; K33; K34; K36]	FALSE	8.69122e-05	0	1	1	4	P26639	P26639 [1-44]	0	4998.5	0	0.01	0.01	0.01	4.34403e-17	3.7678e-17	4.94188e-17				400					High	Not Found	Not Found	Not Found	High	0	5.891e-08	5.73	53.16
FALSE	High	[F].SKSATSPEGKKLPR.[T]	F	3xAcetyl:2H(3) [K2; K10; K11]; 1xAcetyl:2H(3) [N-Term]	P13639 3xAcetyl:2H(3) [K275; K283; K284]; 1xAcetyl:2H(3) [N-Term]	FALSE	0.00638575	0	1	1	4	P13639	P13639 [274-287]	0	1665.96	0	0.356	0.125	0.374	0.43408	0.0384289	0.395831	0	0	0	215.6	76.7	26.9	80.7		High	Peak Found	Peak Found	High	High	0	8.813e-05	2.94	33.13
FALSE	High	[-].MEVTGDAGVPESGEIR.[T]	-	1xAcetyl [N-Term]	O00273 1xAcetyl [N-Term]	FALSE	0.00776247	0	1	1	3	O00273	O00273 [1-16]	0	1688.78	0	0.01	0.01	0.01	4.34403e-17	3.7678e-17	4.94188e-17				400					High	Not Found	Not Found	Not Found	High	0	0.0002167	2.33	41.6
FALSE	High	[-].MEVSPLQPVNENMQVNKIKKNEDAKKR.[L]	-	1xAcetyl [N-Term]; 5xAcetyl:2H(3) [K17; K19; K20; K25; K26]	P11388 1xAcetyl [N-Term]; 5xAcetyl:2H(3) [K17; K19; K20; K25; K26]	FALSE	0.00230256	0	1	1	1	P11388	P11388 [1-27]	0	3434.82	0	0.01	0.01	0.01	4.34403e-17	3.7678e-17	4.94188e-17				400					High	Not Found	Not Found	Not Found	High	0	1.55e-05	3.91	58.62
FALSE	High	[R].SKSDPIMLLKDR.[M]	R	2xAcetyl:2H(3) [K2; K10]; 1xAcetyl:2H(3) [N-Term]	P08559 2xAcetyl:2H(3) [K313; K321]; 1xAcetyl:2H(3) [N-Term]	FALSE	0.00485176	0	1	1	10	P08559	P08559 [312-323]	0	1537.86	0	0.567	0.759	0.467	0.842244	0.963439	0.669693	0	0	0	143.2	81.2	108.7	66.9		High	High	Peak Found	High	High	0	5.538e-05	3.86	60.94
FALSE	High	[M].SKSESPKEPEQLR.[K]	M	1xAcetyl [N-Term]; 2xAcetyl:2H(3) [K2; K7]	P09651 1xAcetyl [N-Term]; 2xAcetyl:2H(3) [K3; K8]	FALSE	0.00389407	0	1	1	50	P09651	P09651 [2-14]	0	1646.85	0	0.742	0.927	0.585	0.960927	0.959081	0.806598	0	0	0	122.9	91.3	113.9	71.9		High	High	High	High	High	0.0001879	0.00319	3.7	29.68
FALSE	High	[-].METEQPEETFPNTETNGEFGKRPAEDMEEEQAFKR.[S]	-	1xAcetyl [N-Term]; 2xAcetyl:2H(3) [K21; K34]	P61978 1xAcetyl [N-Term]; 2xAcetyl:2H(3) [K21; K34]	FALSE	0.000391143	0	1	1	11	P61978	P61978 [1-35]	0	4263.89	0	0.183	0.13	0.331	0.013713	0.00133433	0.150052	0	0	0	243.4	44.4	31.6	80.6		High	Peak Found	Peak Found	High	High	0	1.543e-06	4.43	52.63
FALSE	High	[R].SKSKITVTSEVPFSKR.[Y]	R	3xAcetyl:2H(3) [K2; K4; K15]; 1xAcetyl:2H(3) [N-Term]	P35268 3xAcetyl:2H(3) [K67; K69; K80]; 1xAcetyl:2H(3) [N-Term]	FALSE	8.32707e-05	0	1	1	5	P35268	P35268 [66-81]	0	1974.13	0	0.625	0.634	0.731	0.863185	0.843013	0.964896	0	0	0	133.8	83.6	84.8	97.8		High	Peak Found	High	Peak Found	High	0	5.488e-08	4.35	51.48
FALSE	High	[-].MESAGLEQLLR.[E]	-	1xAcetyl [N-Term]	Q8TEX9 1xAcetyl [N-Term]	FALSE	0.0269823	0	1	1	4	Q8TEX9	Q8TEX9 [1-11]	0	1288.66	0	2.377	2.583	1.636	0.301056	0.46299	0.576177	0	0	0	52.7	125.2	136	86.2		High	Peak Found	High	High	High	0	0.00103	2.58	62.46
FALSE	High	[-].MERPDKAALNALQPPEFR.[N]	-	1xAcetyl [N-Term]; 1xAcetyl:2H(3) [K6]	Q3ZAQ7 1xAcetyl [N-Term]; 1xAcetyl:2H(3) [K6]	FALSE	0.0116054	0	1	1	1	Q3ZAQ7	Q3ZAQ7 [1-18]	0	2170.12	0	2.324	2.909	1.359	0.355107	0.550951	0.80723	0	0	0	52.7	122.4	153.3	71.6		Peak Found	Peak Found	High	Peak Found	High	0	0.0002442	5.18	55.19
FALSE	High	[R].MEQFQKEKEELDR.[G]	R	2xAcetyl:2H(3) [K6; K8]	Q16543 2xAcetyl:2H(3) [K45; K47]	FALSE	0.00104029	0	1	1	2	Q16543	Q16543 [40-52]	0	1799.88	0	0.407	0.618	0.337	0.803935	0.969912	0.614749	0	0	0	169.4	68.9	104.6	57.1		Peak Found	Peak Found	Peak Found	High	High	0	4.011e-06	4.91	39.84
FALSE	High	[-].MEPGPDGPAASGPAAIR.[E]	-	1xAcetyl [N-Term]	P19623 1xAcetyl [N-Term]	FALSE	0.00353147	0	1	1	18	P19623	P19623 [1-17]	0	1635.78	0	0.922	0.881	0.727	0.936087	0.976043	0.985609	0	0	0	113.3	104.5	99.8	82.4		High	High	High	High	High	0	0.0007424	1.58	36.79
FALSE	High	[E].MHDVTAQDPKLLVHLKATR.[N]	E	2xAcetyl:2H(3) [K10; K16]; 1xAcetyl:2H(3) [N-Term]	Q13435 2xAcetyl:2H(3) [K486; K492]; 1xAcetyl:2H(3) [N-Term]	FALSE	0.000188944	0	1	1	4	Q13435	Q13435 [477-495]	0	2308.28	0	100	100	100	4.34403e-17	3.7678e-17	4.94188e-17					171.9	140.4	87.7		Not Found	High	Peak Found	High	High	0	2.191e-07	5.4	50.79
FALSE	High	[-].MKALILVGGYGTR.[L]	-	1xAcetyl:2H(3) [K2]; 1xAcetyl:2H(3) [N-Term]	Q9Y5P6 1xAcetyl:2H(3) [K2]; 1xAcetyl:2H(3) [N-Term]	FALSE	0.00494146	0	1	1	3	Q9Y5P6	Q9Y5P6 [1-13]	0	1468.85	0	100	100	100	4.34403e-17	3.7678e-17	4.94188e-17					121	139.3	139.7		Not Found	Peak Found	High	High	High	0	0.001087	4.26	71.49
FALSE	High	[E].MKALINADELASDVAGAEALLDR.[H]	E	1xAcetyl:2H(3) [K2]; 1xAcetyl:2H(3) [N-Term]	Q13813 1xAcetyl:2H(3) [K381]; 1xAcetyl:2H(3) [N-Term]	FALSE	0.00130429	0	1	1	1	Q13813	Q13813 [380-402]	0	2476.29	0	6.988	8.122	4.681	0.0521069	0.124831	0.094684	0	0	0	19.2	134.5	156.3	90.1		Peak Found	Peak Found	High	Peak Found	High	0	5.908e-06	4.24	94.35
FALSE	High	[N].SKIVVVTAGVR.[Q]	N	1xAcetyl:2H(3) [K2]; 1xAcetyl:2H(3) [N-Term]	P07195 1xAcetyl:2H(3) [K91]; 1xAcetyl:2H(3) [N-Term]	FALSE	0.0093773	0	1	1	4	P07195	P07195 [90-100]	0	1218.77	0	0.726	0.699	1.05	0.994056	0.960288	0.888954	0	0	0	115.1	83.6	80.4	120.9		High	High	High	Peak Found	High	0	0.0001699	3.77	48.68
FALSE	High	[-].MIKLFSLKQQKKEEESAGGTKGSSKKASAAQLR.[I]	-	1xAcetyl [N-Term]; 7xAcetyl:2H(3) [K3; K8; K11; K12; K21; K25; K26]	P61081 1xAcetyl [N-Term]; 7xAcetyl:2H(3) [K3; K8; K11; K12; K21; K25; K26]	FALSE	3.83036e-05	0	1	1	16	P61081	P61081 [1-33]	0	3922.17	0	0.233	0.376	0.369	0.0479632	0.271688	0.234864	0	0	0	202.2	47.1	76.1	74.6		High	High	High	High	High	0	1.39e-05	5.07	74.11
FALSE	High	[-].MLKKFDKKDEESGGGSNPFQHLEKSAVLQEAR.[V]	-	1xAcetyl [N-Term]; 5xAcetyl:2H(3) [K3; K4; K7; K8; K24]	Q9Y678 1xAcetyl [N-Term]; 5xAcetyl:2H(3) [K3; K4; K7; K8; K24]	FALSE	0.00739279	0	1	1	1	Q9Y678	Q9Y678 [1-32]	0	3870.98	0	0.041	0.01	0.01	0.00342545	3.7678e-17	4.94188e-17	0			384.2	15.8				High	Peak Found	Not Found	Not Found	High	0	0.0001128	2.94	69.83
FALSE	High	[-].MIKAILIFNNHGKPR.[L]	-	2xAcetyl:2H(3) [K3; K13]; 1xAcetyl:2H(3) [N-Term]	Q92572 2xAcetyl:2H(3) [K3; K13]; 1xAcetyl:2H(3) [N-Term]	FALSE	0.000228378	0	1	1	2	Q92572	Q92572 [1-15]	0	1887.1	0	0.441	0.723	0.369	0.803089	0.982978	0.598615	0	0	0	157.9	69.7	114.2	58.3		High	High	Peak Found	Peak Found	High	0	3.043e-07	5.23	72.27
FALSE	High	[-].MLGSGFKAER.[L]	-	1xAcetyl [N-Term]; 1xAcetyl:2H(3) [K7]	P53990 1xAcetyl [N-Term]; 1xAcetyl:2H(3) [K7]	FALSE	0.0121106	0	1	1	1	P53990	P53990 [1-10]	0	1182.6	0	0.413	0.68	0.437	0.786163	0.967611	0.728542	0	0	0	158.1	65.3	107.5	69.2		Peak Found	Peak Found	Peak Found	High	High	0	0.0002637	3.34	46.63
FALSE	High	[M].MLGPEGGEGFVVKLR.[G]	M	1xAcetyl [N-Term]; 1xAcetyl:2H(3) [K13]	P52597 1xAcetyl [N-Term]; 1xAcetyl:2H(3) [K14]	FALSE	0.000761648	0	1	1	38	P52597	P52597 [2-16]	0	1675.89	0	0.645	0.676	0.941	0.885051	0.892149	0.930714	0	0	0	122.6	79.1	82.9	115.4		High	High	High	High	High	0	3.903e-05	3.55	64.91
FALSE	High	[R].SKKDLIQMLVQR.[G]	R	2xAcetyl:2H(3) [K2; K3]; 1xAcetyl:2H(3) [N-Term]	Q02880 2xAcetyl:2H(3) [K1091; K1092]; 1xAcetyl:2H(3) [N-Term]	FALSE	0.0120371	0	1	1	4	Q02880	Q02880 [1090-1101]	0	1593.93	0	0.317	0.01	1.116	0.668596	3.7678e-17	0.919342	0		0	164.4	52.1		183.5		Peak Found	High	Not Found	Peak Found	High	0	0.0002601	4.22	73.18
FALSE	High	[E].MLDSLLALGGLVLLR.[D]	E	1xAcetyl:2H(3) [N-Term]	Q8TE02 1xAcetyl:2H(3) [N-Term]	FALSE	0.000645755	0	1	1	2	Q8TE02	Q8TE02 [17-31]	0	1628.98	0														No Quan Values	High	High	Not Found	Not Found	High	0	1.788e-06	2.86
FALSE	High	[-].MKTILSNQTVDIPENVDITLKGR.[T]	-	2xAcetyl:2H(3) [K2; K21]; 1xAcetyl:2H(3) [N-Term]	P32969 2xAcetyl:2H(3) [K2; K21]; 1xAcetyl:2H(3) [N-Term]	FALSE	4.02239e-05	0	1	1	31	P32969	P32969 [1-23]	0	2720.48	0	0.553	0.85	0.863	0.757931	0.99706	0.985099	0	0	0	122.5	67.7	104.1	105.7		High	High	High	High	High	0	1.583e-08	5.22	70.42
FALSE	High	[C].MKSVTEQGAELSNEER.[N]	C	1xAcetyl:2H(3) [K2]	P63104 1xAcetyl:2H(3) [K27]	FALSE	0.000213523	0	1	1	1	P63104	P63104 [26-41]	0	1852.88	0														No Quan Values	Not Found	Peak Found	Not Found	High	High	0	2.723e-07	4.64	31.41
FALSE	High	[F].SKKKGEQPTGQQR.[R]	F	3xAcetyl:2H(3) [K2; K3; K4]; 1xAcetyl:2H(3) [N-Term]	Q92733 3xAcetyl:2H(3) [K441; K442; K443]; 1xAcetyl:2H(3) [N-Term]	FALSE	0.00515727	0	1	1	4	Q92733	Q92733 [440-452]	0	1651.92	0	1.945	1.059	1.836	0.528879	0.88693	0.619109	0	0	0	68.5	133.2	72.5	125.8		Peak Found	High	Peak Found	Peak Found	High	0	0.0004261	4.11	20.62
FALSE	High	[-].MKPILLQGHER.[S]	-	1xAcetyl:2H(3) [K2]; 1xAcetyl:2H(3) [N-Term]	Q13347 1xAcetyl:2H(3) [K2]; 1xAcetyl:2H(3) [N-Term]	FALSE	0.0286639	0	1	1	13	Q13347	Q13347 [1-11]	0	1411.8	0	0.962	0.939	0.947	0.930218	0.954008	0.926734	0	0	0	103.9	100	97.6	98.4		Peak Found	High	High	High	High	0.0002176	0.004274	3.09	45.27
FALSE	High	[-].MLLPVFTLKLR.[H]	-	1xAcetyl:2H(3) [K9]; 1xAcetyl:2H(3) [N-Term]	Q9BXC9 1xAcetyl:2H(3) [K9]; 1xAcetyl:2H(3) [N-Term]	FALSE	0.0240515	0	1	1	2	Q9BXC9	Q9BXC9 [1-11]	0	1420.89	0	100	100	100	4.34403e-17	3.7678e-17	4.94188e-17					109.6	128.7	161.8		Not Found	Peak Found	Peak Found	High	High	0	0.0008536	2.64	89.87
FALSE	High	[-].MKLLTHNLLSSHVR.[G]	-	1xAcetyl:2H(3) [K2]; 1xAcetyl:2H(3) [N-Term]	Q9UI30 1xAcetyl:2H(3) [K2]; 1xAcetyl:2H(3) [N-Term]	FALSE	0.0230531	0	1	1	1	Q9UI30	Q9UI30 [1-14]	0	1738.99	0	0.46	0.54	0.562	0.868536	0.959081	0.904663	0	0	0	156.1	71.8	84.3	87.8		Peak Found	Peak Found	High	Peak Found	High	0	0.0007911	3.24	60.44
FALSE	High	[-].MKIEEVKSTTKTQR.[I]	-	3xAcetyl:2H(3) [K2; K7; K11]; 1xAcetyl:2H(3) [N-Term]	Q9Y265 3xAcetyl:2H(3) [K2; K7; K11]; 1xAcetyl:2H(3) [N-Term]	FALSE	8.63824e-05	0	1	1	16	Q9Y265	Q9Y265 [1-14]	0	1859.03	0	1.017	1.259	1.011	0.895407	0.711321	0.888312	0	0	0	93.3	94.9	117.4	94.4		High	High	High	High	High	0	2.017e-05	4.4	48.77
FALSE	High	[-].MKHYEVEILDAKTR.[E]	-	2xAcetyl:2H(3) [K2; K12]; 1xAcetyl:2H(3) [N-Term]	Q9NZ01 2xAcetyl:2H(3) [K2; K12]; 1xAcetyl:2H(3) [N-Term]	FALSE	0.00257027	0	1	1	1	Q9NZ01	Q9NZ01 [1-14]	0	1867.99	0	0.673	0.01	0.49	0.989475	3.7678e-17	0.835967	0		0	184.9	124.4		90.7		Peak Found	High	Not Found	Peak Found	High	0	1.872e-05	5.22	55.39
FALSE	High	[-].MKGKEEKEGGAR.[L]	-	3xAcetyl:2H(3) [K2; K4; K7]; 1xAcetyl:2H(3) [N-Term]	Q9UNE7 3xAcetyl:2H(3) [K2; K4; K7]; 1xAcetyl:2H(3) [N-Term]	FALSE	0.00593476	0	1	1	3	Q9UNE7	Q9UNE7 [1-12]	0	1499.79	0	0.235	0.438	0.095	0.0501204	0.422982	1.84821e-05	0	0	0	226.2	53.3	99	21.6		Peak Found	Peak Found	Peak Found	High	High	0	7.769e-05	4	28.15
FALSE	High	[-].MKFVYKEEHPFEKR.[R]	-	3xAcetyl:2H(3) [K2; K6; K13]; 1xAcetyl:2H(3) [N-Term]	O95166 3xAcetyl:2H(3) [K2; K6; K13]; 1xAcetyl:2H(3) [N-Term]	FALSE	0.00044746	0	1	1	6	O95166	O95166 [1-14]	0	2048.07	0	0.58	0.741	0.808	0.943146	0.990877	0.994778	0	0	0	127.8	74.2	94.7	103.3		High	Peak Found	Peak Found	High	High	0	3.07e-05	5.25	58.01
FALSE	High	[Q].MKETIMNQEKLAKLQAQVR.[I]	Q	3xAcetyl:2H(3) [K2; K10; K13]; 1xAcetyl:2H(3) [N-Term]	P20290 3xAcetyl:2H(3) [K46; K54; K57]; 1xAcetyl:2H(3) [N-Term]	FALSE	5.69966e-05	0	1	1	15	P20290	P20290 [45-63]	0	2439.35	0	0.693	0.939	0.764	0.930218	0.954008	0.985609	0	0	0	117.8	81.6	110.6	90		High	High	High	High	High	0	1.999e-06	5.5	63.25
FALSE	High	[E].MKESKLPGDKGLVLMSR.[A]	E	3xAcetyl:2H(3) [K2; K5; K10]; 1xAcetyl:2H(3) [N-Term]	P27824 3xAcetyl:2H(3) [K110; K113; K118]; 1xAcetyl:2H(3) [N-Term]	FALSE	0.000319674	0	1	1	3	P27824	P27824 [109-125]	0	2069.15	0	100	100	100	4.34403e-17	3.7678e-17	4.94188e-17					176.4	126.3	97.3		Not Found	High	Peak Found	High	High	0	5.38e-07	4.26	60.94
FALSE	High	[R].SKILKQKEKKKR.[E]	R	6xAcetyl:2H(3) [K2; K5; K7; K9; K10; K11]; 1xAcetyl:2H(3) [N-Term]	Q99575 6xAcetyl:2H(3) [K907; K910; K912; K914; K915; K916]; 1xAcetyl:2H(3) [N-Term]	FALSE	0.0057916	0	1	1	5	Q99575	Q99575 [906-917]	0	1829.2	0	6.003	7.05	3.258	0.0275959	0.149878	0.217829	0	0	0	23.1	138.7	162.9	75.3		Peak Found	Peak Found	High	High	High	0	7.433e-05	4.15	47.17
FALSE	High	[-].MKDSLVLLGR.[V]	-	1xAcetyl:2H(3) [K2]; 1xAcetyl:2H(3) [N-Term]	O76071 1xAcetyl:2H(3) [K2]; 1xAcetyl:2H(3) [N-Term]	FALSE	0.012409	0	1	1	8	O76071	O76071 [1-10]	0	1221.71	0	1.113	1.301	1.033	0.825192	0.671392	0.871629	0	0	0	90	100.1	117.1	92.9		High	High	High	High	High	0	0.001195	2.8	62.32
FALSE	High	[N].SKLVIITAGAR.[Q]	N	1xAcetyl:2H(3) [K2]; 1xAcetyl:2H(3) [N-Term]	P00338 1xAcetyl:2H(3) [K90]; 1xAcetyl:2H(3) [N-Term]	FALSE	0.00990591	0	1	1	8	P00338	P00338 [89-99]	0	1218.77	0	1.121	1.209	1.275	0.813174	0.87802	0.744876	0	0	0	86.9	97.4	105	110.8		High	High	High	High	High	0	0.0001876	3.76	54.83
FALSE	High	[C].MKAVTEQGAELSNEER.[N]	C	1xOxidation [M1]; 1xAcetyl:2H(3) [K2]	P27348 1xOxidation [M26]; 1xAcetyl:2H(3) [K27]	FALSE	0.000444732	0	1	1	1	P27348	P27348 [26-41]	0	1852.88	1	100		100	4.34403e-17		4.94188e-17					101.6		298.4		Not Found	Peak Found	Not Found	High	High	0	9.407e-07	4.49	31.41
FALSE	High	[E].MKATESGAQSAPLPMEGVDISPKQDEGVLKVIKR.[E]	E	4xAcetyl:2H(3) [K2; K23; K30; K33]; 1xAcetyl:2H(3) [N-Term]	Q02790 4xAcetyl:2H(3) [K7; K28; K35; K38]; 1xAcetyl:2H(3) [N-Term]	FALSE	0.00776247	0	1	1	3	Q02790	Q02790 [6-39]	0	3835.04	0	100	100	100	4.34403e-17	3.7678e-17	4.94188e-17					89.2	173.9	137		Not Found	Peak Found	High	High	High	0	0.0001232	3.66	68.27
FALSE	High	[H].SKKQGKQEAADAALR.[V]	H	3xAcetyl:2H(3) [K2; K3; K6]; 1xAcetyl:2H(3) [N-Term]	P55265 3xAcetyl:2H(3) [K777; K778; K781]; 1xAcetyl:2H(3) [N-Term]	FALSE	0.000433988	0	1	1	14	P55265	P55265 [776-790]	0	1780.99	0	0.69	0.327	0.784	0.929836	0.294886	0.991092	0	0	0	142.8	98.5	46.7	112		High	Peak Found	High	Peak Found	High	0	9.055e-07	4.39	38.28
FALSE	High	[K].EVLQKAIEENNNFSKMAEEKLTHKMEANKENR.[E]	K	1xGlu->pyro-Glu [N-Term]; 5xAcetyl:2H(3) [K5; K15; K20; K24; K29]	P16949 1xGlu->pyro-Glu [N-Term]; 5xAcetyl:2H(3) [K85; K95; K100; K104; K109]	FALSE	0.000690675	0	1	1	4	P16949	P16949 [81-112]	0	4010.02	0	0.01	0.01	0.852	4.34403e-17	3.7678e-17	0.987852			0	216			184		High	Not Found	Not Found	Peak Found	High	0	1.997e-06	4.01	77.22
FALSE	High	[R].SYSKLLCGLLAER.[L]	R	1xCarbamidomethyl [C7]; 1xAcetyl:2H(3) [K4]; 1xAcetyl:2H(3) [N-Term]	P14174 1xCarbamidomethyl [C81]; 1xAcetyl:2H(3) [K78]; 1xAcetyl:2H(3) [N-Term]	FALSE	0.012409	0	1	1	1	P14174	P14174 [75-87]	0	1599.87	0	1.225	2.026	0.936	0.799447	0.695455	0.964776	0	0	0	77.1	94.5	156.2	72.2		Peak Found	Peak Found	High	Peak Found	High	0	0.0002726	2.81	72.32
FALSE	High	[S].EVILPVPAFNVINGGSHAGNKLAMQEFMILPVGAANFR.[E]	S	1xGlu->pyro-Glu [N-Term]; 1xAcetyl:2H(3) [K21]	P06733 1xGlu->pyro-Glu [N-Term]; 1xAcetyl:2H(3) [K162]	FALSE	0.00575636	0	1	1	15	P06733	P06733 [142-179]	0	4049.13	0	1.236	0.789	1.28	0.76089	0.995165	0.727538	0	0	0	92.9	114.9	73.3	118.9		High	High	High	High	High	0.0001879	0.003406	3.59	85.81
FALSE	High	[E].VKLALKKDR.[E]	E	3xAcetyl:2H(3) [K2; K6; K7]; 1xAcetyl:2H(3) [N-Term]	P31943 3xAcetyl:2H(3) [K68; K72; K73]; 1xAcetyl:2H(3) [N-Term]; P55795 3xAcetyl:2H(3) [K68; K72; K73]; 1xAcetyl:2H(3) [N-Term]	FALSE	0.029543	0	2	2	3	P31943; P55795	P31943 [67-75]; P55795 [67-75]	0	1250.82	0	28.738	13.083	21.969	1.83688e-05	0.0560169	1.19474e-05	0	0	0	6.2	177.4	80.8	135.6	Shared	Peak Found	High	High	High	High	0	0.001207	3.2	51.64
FALSE	High	[E].VKLALKKDRETMGHR.[Y]	E	3xAcetyl:2H(3) [K2; K6; K7]; 1xAcetyl:2H(3) [N-Term]	P31943 3xAcetyl:2H(3) [K68; K72; K73]; 1xAcetyl:2H(3) [N-Term]; P55795 3xAcetyl:2H(3) [K68; K72; K73]; 1xAcetyl:2H(3) [N-Term]	FALSE	0.0263373	0	2	2	2	P31943; P55795	P31943 [67-81]; P55795 [67-81]	1	1962.13	0	28.367	19.792	14.044	9.7594e-11	3.47467e-05	1.01656e-05	0	0	0	6.3	179.5	125.3	88.9	Shared	Peak Found	High	Peak Found	High	High	0.0003196	0.00855	3	45.65
FALSE	High	[M].AVAVGRPSNEELR.[N]	M	1xAcetyl [N-Term]	Q9NVA2 1xAcetyl [N-Term]	FALSE	0.0273107	0	1	1	4	Q9NVA2	Q9NVA2 [2-14]	0	1439.76	0	0.421	0.576	0.358	0.43408	0.746282	0.208966	0	0	0	169.9	71.5	97.8	60.8		High	High	Peak Found	High	High	0	0.001053	3.43	27.28
FALSE	High	[M].VKLFIGNLPR.[E]	M	1xAcetyl:2H(3) [K2]; 1xAcetyl:2H(3) [N-Term]	Q9BQ04 1xAcetyl:2H(3) [K3]; 1xAcetyl:2H(3) [N-Term]; Q9BWF3 1xAcetyl:2H(3) [K3]; 1xAcetyl:2H(3) [N-Term]	FALSE	0.0110537	0	1	2	32	Q9BWF3	Q9BQ04 [2-11]; Q9BWF3 [2-11]	0	1246.78	0	0.69	0.763	0.771	0.929836	0.959081	0.987815	0	0	0	124.1	85.6	94.7	95.6		High	High	High	High	High	0	0.0005332	3.94	73.86
FALSE	High	[M].VKLSKEAKQR.[L]	M	3xAcetyl:2H(3) [K2; K5; K8]; 1xAcetyl:2H(3) [N-Term]	Q9P0U1 3xAcetyl:2H(3) [K3; K6; K9]; 1xAcetyl:2H(3) [N-Term]	FALSE	0.0306331	0	1	1	10	Q9P0U1	Q9P0U1 [2-11]	0	1366.84	0	1.132	0.906	1.176	0.809138	0.965822	0.728542	0	0	0	94.9	107.5	85.9	111.7		Peak Found	High	High	High	High	0.0002176	0.004526	3.32	38.57
FALSE	High	[M].VKLTAELIEQAAQYTNAVR.[D]	M	1xAcetyl:2H(3) [K2]; 1xAcetyl:2H(3) [N-Term]	P09661 1xAcetyl:2H(3) [K3]; 1xAcetyl:2H(3) [N-Term]	FALSE	2.0782e-05	0	1	1	21	P09661	P09661 [2-20]	0	2208.21	0	0.611	0.713	0.675	0.845056	0.935887	0.919342	0	0	0	133.4	81.6	95.1	90		High	High	High	High	High	0	5.13e-09	5.94	92.21
FALSE	High	[M].ATVTATTKVPEIR.[D]	M	1xAcetyl [N-Term]; 1xAcetyl:2H(3) [K8]	Q9Y230 1xAcetyl [N-Term]; 1xAcetyl:2H(3) [K9]	FALSE	0.00757538	0	1	1	29	Q9Y230	Q9Y230 [2-14]	0	1473.84	0	2.581	2.326	3.5	0.0758783	0.125101	0.0051962	0	0	0	42.5	109.7	98.9	148.8		High	High	High	High	High	0	0.000899	2.46	42.76
FALSE	High	[M].VKIVTVKTQAYQDQKPGTSGLR.[K]	M	3xAcetyl:2H(3) [K2; K7; K15]; 1xAcetyl:2H(3) [N-Term]	P36871 3xAcetyl:2H(3) [K3; K8; K16]; 1xAcetyl:2H(3) [N-Term]	FALSE	7.12801e-06	0	1	1	20	P36871	P36871 [2-23]	0	2597.47	0	0.299	0.445	0.383	0.139992	0.442734	0.270315	0	0	0	188	56.2	83.7	72		High	High	High	High	High	0	5.246e-08	5.82	60.64
FALSE	High	[M].VKMAAAGGGGGGGR.[Y]	M	1xAcetyl:2H(3) [K2]; 1xAcetyl:2H(3) [N-Term]	P14866 1xAcetyl:2H(3) [K34]; 1xAcetyl:2H(3) [N-Term]	FALSE	7.1905e-05	0	1	1	42	P14866	P14866 [33-46]	0	1235.64	0	0.88	0.834	0.952	0.970666	0.99998	0.92321	0	0	0	109.1	96	91	103.9		High	High	High	High	High	0	4.249e-08	5.45	28.75
FALSE	High	[M].ATVEPETTPTPNPPTTEEEKTESNQEVANPEHYIKHPLQNR.[W]	M	1xAcetyl [N-Term]; 2xAcetyl:2H(3) [K20; K35]	P06730 1xAcetyl [N-Term]; 2xAcetyl:2H(3) [K21; K36]	FALSE	0.00373107	0	1	1	3	P06730	P06730 [2-42]	0	4785.3	0	0.01	0.01	0.01	4.34403e-17	3.7678e-17	4.94188e-17				400					High	Not Found	Not Found	Not Found	High	0	0.0001677	3.87	45.22
FALSE	High	[Y].ATVEEVDAAMNARPHKVDGR.[V]	Y	1xAcetyl:2H(3) [K16]; 1xAcetyl:2H(3) [N-Term]	P09651 1xAcetyl:2H(3) [K78]; 1xAcetyl:2H(3) [N-Term]	FALSE	0.0127147	0	1	1	3	P09651	P09651 [63-82]	0	2256.13	0	0.595	0.602	0.613	0.819268	0.792695	0.850309	0	0	0	142.4	84.7	85.7	87.3		High	Peak Found	High	Peak Found	High	0	0.000312	3.58	42.53
FALSE	High	[M].ATTGTPTADRGDAAATDDPAAR.[F]	M	1xAcetyl [N-Term]	Q86TI2 1xAcetyl [N-Term]	FALSE	0.0225011	0	1	1	2	Q86TI2	Q86TI2 [2-23]	1	2143.99	0	0.527	0.872	0.277	0.924006	0.971297	0.463452	0	0	0	149.4	78.8	130.4	41.4		High	Peak Found	High	Peak Found	High	0	0.0007577	3.92	21.15
FALSE	High	[M].ATTATMATSGSAR.[K]	M	1xAcetyl [N-Term]	P38919 1xAcetyl [N-Term]	FALSE	0.0178696	0	1	1	17	P38919	P38919 [2-14]	0	1267.59	0	0.134	0.186	0.246	0.00210112	0.0126191	0.0332711	0	0	0	255.3	34.3	47.5	62.8		High	High	High	High	High	0.0001346	0.002525	3.33	21.54
FALSE	High	[M].VKMAAAGGGGGGGR.[Y]	M	1xOxidation [M3]; 1xAcetyl:2H(3) [K2]; 1xAcetyl:2H(3) [N-Term]	P14866 1xOxidation [M35]; 1xAcetyl:2H(3) [K34]; 1xAcetyl:2H(3) [N-Term]	FALSE	0.000161172	0	1	1	4	P14866	P14866 [33-46]	0	1251.64	0	1.015	1.092	1.021	0.890109	0.867898	0.891765	0	0	0	96.9	98.3	105.8	99		Peak Found	High	High	High	High	0	1.684e-07	4.93	21.08
FALSE	High	[M].ATNWGSLLQDKQQLEELAR.[Q]	M	1xAcetyl [N-Term]; 1xAcetyl:2H(3) [K11]	P48637 1xAcetyl [N-Term]; 1xAcetyl:2H(3) [K12]	FALSE	0.000208364	0	1	1	15	P48637	P48637 [2-20]	0	2287.18	0	0.462	0.527	0.775	0.536983	0.635511	0.987852	0	0	0	144.7	66.8	76.3	112.2		High	High	High	High	High	0	2.598e-07	5.18	77.9
FALSE	High	[M].ATNFLAHEKIWFDKFKYDDAERR.[F]	M	1xAcetyl [N-Term]; 3xAcetyl:2H(3) [K9; K14; K16]	P29692 1xAcetyl [N-Term]; 3xAcetyl:2H(3) [K10; K15; K17]	FALSE	0.000239827	0	1	1	6	P29692	P29692 [2-24]	1	3077.55	0	0.537	0.589	0.431	0.725084	0.768455	0.40232	0	0	0	156.5	84	92.1	67.5		High	High	High	High	High	0	9.399e-07	7.05	71.6
FALSE	High	[F].ATKKAKAKGKGQSQTR.[V]	F	5xAcetyl:2H(3) [K3; K4; K6; K8; K10]; 1xAcetyl:2H(3) [N-Term]	Q96E11 5xAcetyl:2H(3) [K58; K59; K61; K63; K65]; 1xAcetyl:2H(3) [N-Term]	FALSE	8.42953e-05	0	1	1	8	Q96E11	Q96E11 [56-71]	0	1958.17	0	0.674	0.537	0.837	0.986288	0.959081	0.991092	0	0	0	131.2	88.5	70.4	109.9		High	High	Peak Found	Peak Found	High	0	5.419e-07	5.36	30.75
FALSE	High	[M].ATGANATPLDFPSKKR.[K]	M	1xAcetyl [N-Term]; 2xAcetyl:2H(3) [K14; K15]	Q15637 1xAcetyl [N-Term]; 2xAcetyl:2H(3) [K15; K16]	FALSE	0.0188728	0	1	1	6	Q15637	Q15637 [2-17]	0	1805.97	0	0.207	0.058	0.288	0.158808	0.0090006	0.230162	0	0	0	257.7	53.3	14.9	74.2		High	Peak Found	High	Peak Found	High	6.911e-05	0.002221	3.42	46.68
FALSE	High	[M].ATEGMILTNHDHQIR.[V]	M	1xAcetyl [N-Term]	Q9NQX3 1xAcetyl [N-Term]	FALSE	0.00752932	0	1	1	1	Q9NQX3	Q9NQX3 [2-16]	0	1777.86	0	0.189	0.101	0.402	0.250809	0.21969	0.638973	0	0	0	236.3	44.7	24	95		High	Peak Found	Peak Found	Peak Found	High	0	0.000117	3.47	34.51
FALSE	High	[M].ATEEKKPETEAAR.[A]	M	1xAcetyl [N-Term]; 2xAcetyl:2H(3) [K5; K6]	P61964 1xAcetyl [N-Term]; 2xAcetyl:2H(3) [K6; K7]	FALSE	0.0161168	0	1	1	11	P61964	P61964 [2-14]	0	1591.81	0	0.01	0.01	0.01	4.34403e-17	3.7678e-17	4.94188e-17				400					High	Not Found	Not Found	Not Found	High	0.0002176	0.004385	2.69	24.19
FALSE	High	[E].ATDAIGHLDR.[Q]	E	1xAcetyl:2H(3) [N-Term]	Q12906 1xAcetyl:2H(3) [N-Term]	FALSE	0.0284912	0	1	1	2	Q12906	Q12906 [299-308]	0	1113.57	0	100	100	100	4.34403e-17	3.7678e-17	4.94188e-17					180.7	184.5	34.8		Not Found	High	Peak Found	High	High	0	0.001132	3.5	30.99
FALSE	High	[E].VKSTAGDTHLGGEDFDNR.[M]	E	1xAcetyl:2H(3) [K2]; 1xAcetyl:2H(3) [N-Term]	P54652 1xAcetyl:2H(3) [K223]; 1xAcetyl:2H(3) [N-Term]; P11142 1xAcetyl:2H(3) [K220]; 1xAcetyl:2H(3) [N-Term]	FALSE	1.71486e-06	0	1	2	27	P11142	P54652 [222-239]; P11142 [219-236]	0	2008.95	0	100	100	100	4.34403e-17	3.7678e-17	4.94188e-17	0	0	0	0.9	147.4	122.5	129.2		Peak Found	High	High	High	High	0	1.18e-07	6.06	35.21
FALSE	High	[M].ATAEKQKHDGR.[V]	M	1xAcetyl [N-Term]; 2xAcetyl:2H(3) [K5; K7]	Q13131 1xAcetyl [N-Term]; 2xAcetyl:2H(3) [K15; K17]	FALSE	0.0142722	0	1	1	5	Q13131	Q13131 [11-21]	0	1372.71	0	1.276	1.628	1.095	0.76089	0.700715	0.899192	0	0	0	80	102.1	130.3	87.6		High	High	High	High	High	0	0.0003482	4.08	17.16
FALSE	High	[M].VKLAAKCILAGDPAVGKTALAQIFR.[S]	M	1xCarbamidomethyl [C7]; 3xAcetyl:2H(3) [K2; K6; K17]; 1xAcetyl:2H(3) [N-Term]	Q9BW83 1xCarbamidomethyl [C8]; 3xAcetyl:2H(3) [K3; K7; K18]; 1xAcetyl:2H(3) [N-Term]	FALSE	5.96978e-06	0	1	1	1	Q9BW83	Q9BW83 [2-26]	0	2791.63	0	0.642	0.531	0.59	0.960927	0.906545	0.888954	0	0	0	144.8	92.9	76.9	85.4		Peak Found	High	Peak Found	Peak Found	High	0	6.168e-10	6.24	90.73
FALSE	High	[M].ASTVVAVGLTIAAAGFAGR.[Y]	M	1xAcetyl [N-Term]	Q96DA6 1xAcetyl [N-Term]	FALSE	2.33422e-05	0	1	1	9	Q96DA6	Q96DA6 [2-20]	0	1773.99	0	0.041	0.893	1.709	0.0217207	0.939874	0.630109	0	0	0	109.8	4.5	98	187.6		High	Peak Found	Peak Found	Peak Found	High	0	5.611e-08	4.5	93.85
FALSE	High	[E].AVFSALVTGHAR.[A]	E	1xAcetyl:2H(3) [N-Term]	P42704 1xAcetyl:2H(3) [N-Term]	FALSE	0.0219622	0	1	1	10	P42704	P42704 [233-244]	0	1273.71	0	57.293	50.649	37.79	2.72728e-07	0.000934632	5.74883e-06	0	0	0	2.7	156.2	138.1	103		Peak Found	High	Peak Found	High	High	0.004644	0.05271	4.27	55.4
FALSE	High	[F].VKGLSEDTTEETLKESFDGSVR.[A]	F	2xAcetyl:2H(3) [K2; K14]	P19338 2xAcetyl:2H(3) [K577; K589]	FALSE	4.35518e-05	0	1	1	11	P19338	P19338 [576-597]	0	2517.25	0	0.146	0.01	0.986	0.174035	3.7678e-17	0.961821	0		0	187.6	27.4		185		Peak Found	Peak Found	Not Found	High	High	0	1.82e-08	6.05	55.06
FALSE	High	[E].CEQALAAEPKAKDPFAHLPKSTFVLDEFKR.[K]	E	1xCarbamidomethyl [C1]; 4xAcetyl:2H(3) [K10; K12; K20; K29]	P26641 1xCarbamidomethyl [C266]; 4xAcetyl:2H(3) [K275; K277; K285; K294]	FALSE	0.0264971	0	1	1	2	P26641	P26641 [266-295]	0	3623.9	0	26.872	12.956	6.151	1.87038e-05	0.068695	0.0541256	0	0	0	8.5	228.8	110.3	52.4		Peak Found	High	Peak Found	Peak Found	High	6.911e-05	0.002275	3.32	73.31
FALSE	High	[E].CEIKINHEGEVNR.[A]	E	1xCarbamidomethyl [C1]; 1xAcetyl:2H(3) [K4]	Q16576 1xCarbamidomethyl [C116]; 1xAcetyl:2H(3) [K119]	FALSE	0.00263386	0	1	1	2	Q16576	Q16576 [116-128]	0	1642.8	0	100	100	100	4.34403e-17	3.7678e-17	4.94188e-17					171.6	117	111.4		Not Found	High	Peak Found	High	High	0	2.012e-05	4.98	35.78
FALSE	High	[M].CDFTEDQTAEFKEAFQLFDR.[T]	M	1xAcetyl [N-Term]; 1xCarbamidomethyl [C1]; 1xAcetyl:2H(3) [K12]	P60660 1xAcetyl [N-Term]; 1xCarbamidomethyl [C2]; 1xAcetyl:2H(3) [K13]	FALSE	4.12198e-05	0	1	1	14	P60660	P60660 [2-21]	0	2584.14	0	0.139	0.266	0.235	0.118215	0.659504	0.265808	0	0	0	243.9	33.8	64.9	57.4		High	Peak Found	Peak Found	Peak Found	High	0	1.446e-06	3.96	79.44
FALSE	High	[A].CALSIEESCRPGDKVPPIKPNAGEESVMNLDKLR.[F]	A	2xCarbamidomethyl [C1; C9]; 3xAcetyl:2H(3) [K14; K19; K32]	P31040 2xCarbamidomethyl [C467; C475]; 3xAcetyl:2H(3) [K480; K485; K498]	FALSE	0.0306331	0	1	1	2	P31040	P31040 [467-500]	0	3944.99	0	0.01	0.01	0.01	4.34403e-17	3.7678e-17	4.94188e-17				400					High	Not Found	Not Found	Not Found	High	0	0.001281	3.65	65.52
FALSE	High	[E].CAEPPRDEPPADGALKR.[A]	E	1xCarbamidomethyl [C1]; 1xAcetyl:2H(3) [K16]; 1xAcetyl:2H(3) [N-Term]	P53041 1xCarbamidomethyl [C11]; 1xAcetyl:2H(3) [K26]; 1xAcetyl:2H(3) [N-Term]	FALSE	0.0136775	0	1	1	11	P53041	P53041 [11-27]	1	1968.97	0	100	100	100	4.34403e-17	3.7678e-17	4.94188e-17					153.7	75.3	171		Not Found	Peak Found	High	High	High	0.0009536	0.01579	3.66	29.49
FALSE	High	[M].VGQLSEGAIAAIMQKGDTNIKPILQVINIRPITTGNSPPR.[Y]	M	2xAcetyl:2H(3) [K15; K21]; 1xAcetyl:2H(3) [N-Term]	P27694 2xAcetyl:2H(3) [K16; K22]; 1xAcetyl:2H(3) [N-Term]	FALSE	7.69078e-05	0	1	1	15	P27694	P27694 [2-41]	0	4346.42	0	4.622	5.789	4.269	0.062354	0.123471	0.0523714	0	0	0	25.5	117.9	147.7	108.9		Peak Found	High	High	High	High	0	4.194e-07	5.14	91.72
FALSE	High	[E].VGVDVAKHVAEDLGKVFGER.[F]	E	2xAcetyl:2H(3) [K7; K15]; 1xAcetyl:2H(3) [N-Term]	P40939 2xAcetyl:2H(3) [K597; K605]; 1xAcetyl:2H(3) [N-Term]	FALSE	2.37743e-05	0	1	1	12	P40939	P40939 [591-610]	0	2260.23	0	17.426	16.67	10.533	0.000326712	0.0217948	0.00596168	0	0	0	8.8	152.8	146.1	92.3		Peak Found	High	High	High	High	0	6.45e-09	6.7	88.76
FALSE	High	[M].AVTLDKDAYYR.[R]	M	1xAcetyl [N-Term]; 1xAcetyl:2H(3) [K6]	Q9Y5B9 1xAcetyl [N-Term]; 1xAcetyl:2H(3) [K7]	FALSE	0.0134302	0	1	1	17	Q9Y5B9	Q9Y5B9 [2-12]	0	1401.71	0	0.293	0.131	0.444	0.150762	0.00678426	0.446602	0	0	0	214.1	62.7	28	95.2		High	High	High	High	High	0.0005741	0.009853	2.8	47.07
FALSE	High	[K].AVTKVQKKDGKKR.[K]	K	5xAcetyl:2H(3) [K4; K7; K8; K11; K12]; 1xAcetyl:2H(3) [N-Term]	Q5QNW6 5xAcetyl:2H(3) [K21; K24; K25; K28; K29]; 1xAcetyl:2H(3) [N-Term]	FALSE	0.00515727	0	1	1	1	Q5QNW6	Q5QNW6 [18-30]	0	1756.1	0	0.531	0.543	0.709	0.920178	0.951456	0.985609	0	0	0	143.8	76.3	78	101.9		High	Peak Found	Peak Found	Peak Found	High	0	6.103e-05	3.42	36.13
FALSE	High	[K].AVTKAQKKDGKKR.[K]	K	5xAcetyl:2H(3) [K4; K7; K8; K11; K12]; 1xAcetyl:2H(3) [N-Term]	Q16778 5xAcetyl:2H(3) [K21; K24; K25; K28; K29]; 1xAcetyl:2H(3) [N-Term]; Q6DN03 5xAcetyl:2H(3) [K21; K24; K25; K28; K29]; 1xAcetyl:2H(3) [N-Term]; P58876 5xAcetyl:2H(3) [K21; K24; K25; K28; K29]; 1xAcetyl:2H(3) [N-Term]; Q93079 5xAcetyl:2H(3) [K21; K24; K25; K28; K29]; 1xAcetyl:2H(3) [N-Term]; O60814 5xAcetyl:2H(3) [K21; K24; K25; K28; K29]; 1xAcetyl:2H(3) [N-Term]; Q99880 5xAcetyl:2H(3) [K21; K…	FALSE	0.0137609	0	7	12	5	Q6DN03; P58876; O60814; Q99880; Q8N257; P23527; Q99877	Q16778 [18-30]; Q6DN03 [18-30]; P58876 [18-30]; Q93079 [18-30]; O60814 [18-30]; Q99880 [18-30]; Q6DRA6 [18-30]; P62807 [18-30]; Q8N257 [18-30]; P06899 [18-30]; P23527 [18-30]; Q99877 [18-30]	0	1728.07	0	0.704	0.688	0.802	0.935955	0.907613	0.997764	0	0	0	125.2	88.1	86.2	100.5	Shared	High	High	High	High	High	0	0.0003278	4.61	31.73
FALSE	High	[M].AVTGWLESLR.[T]	M	1xAcetyl [N-Term]	Q9BVM2 1xAcetyl [N-Term]	FALSE	0.0220957	0	1	1	9	Q9BVM2	Q9BVM2 [2-11]	0	1173.63	0	0.39	0.48	0.341	0.76089	0.878498	0.549476	0	0	0	180.9	70.6	86.8	61.6		High	Peak Found	Peak Found	High	High	0.0006112	0.009944	3.74	69.56
FALSE	High	[R].VHELNEEIGKLLAKVEQLGAEGNVEESQKVMDEVEKAR.[A]	R	4xAcetyl:2H(3) [K10; K14; K29; K36]	Q9Y383 4xAcetyl:2H(3) [K135; K139; K154; K161]	FALSE	0.000626314	0	1	1	3	Q9Y383	Q9Y383 [126-163]	0	4428.3	0	0.667	0.042	0.281	0.977631	0.09075	0.420441	0	0	0	201.1	134.1	8.4	56.4		High	Peak Found	Peak Found	Peak Found	High	0	5.55e-05	4.5	84.94
FALSE	High	[E].VHMLDIESFSFLNR.[A]	E	1xAcetyl:2H(3) [N-Term]	Q9Y230 1xAcetyl:2H(3) [N-Term]	FALSE	0.000333653	0	1	1	3	Q9Y230	Q9Y230 [301-314]	0	1752.88	0	100	100	100	4.34403e-17	3.7678e-17	4.94188e-17					126.6	142.6	130.9		Not Found	High	High	High	High	0	2.503e-05	5.16	69.69
FALSE	High	[C].AVPIAQKSEPHSLSSEALMR.[R]	C	1xAcetyl:2H(3) [K7]; 1xAcetyl:2H(3) [N-Term]	Q9NR28 1xAcetyl:2H(3) [K62]; 1xAcetyl:2H(3) [N-Term]	FALSE	0.00014175	0	1	1	9	Q9NR28	Q9NR28 [56-75]	0	2241.18	0	100	100	100	4.34403e-17	3.7678e-17	4.94188e-17					142.6	83.8	173.6		Not Found	High	High	High	High	0	1.368e-07	5.28	47.33
FALSE	High	[R].AVPLALALISVSNPR.[L]	R	1xAcetyl:2H(3) [N-Term]	Q13200 1xAcetyl:2H(3) [N-Term]	FALSE	0.0121845	0	1	1	3	Q13200	Q13200 [689-703]	0	1565.95	0	0.084	0.01	0.729	0.0900566	3.7678e-17	0.985609	0		0	220.7	18.5		160.8		Peak Found	High	Not Found	Peak Found	High	0	0.0003782	3.17	88.82
FALSE	High	[E].VKATAGDTHLGGEDFDNR.[L]	E	1xAcetyl:2H(3) [K2]; 1xAcetyl:2H(3) [N-Term]	P48741 1xAcetyl:2H(3) [K222]; 1xAcetyl:2H(3) [N-Term]; P17066 1xAcetyl:2H(3) [K222]; 1xAcetyl:2H(3) [N-Term]; P0DMV9 1xAcetyl:2H(3) [K220]; 1xAcetyl:2H(3) [N-Term]; P34931 1xAcetyl:2H(3) [K222]; 1xAcetyl:2H(3) [N-Term]	FALSE	1.09074e-06	0	2	4	38	P17066; P0DMV9	P48741 [221-238]; P17066 [221-238]; P0DMV9 [219-236]; P34931 [221-238]	0	1992.95	0	41.877	40.049	43.413	5.34592e-13	1.18323e-12	4.94188e-17	0	0	0	3.2	132.6	126.8	137.4	Shared	High	High	High	High	High	0	5.427e-09	7.01	36.76
FALSE	High	[M].AVNVYSTSVTSDNLSR.[H]	M	1xAcetyl [N-Term]	Q15691 1xAcetyl [N-Term]	FALSE	0.0306331	0	1	1	5	Q15691	Q15691 [2-17]	0	1754.86	0	0.856	1.266	0.45	0.957078	0.878498	0.807225	0	0	0	112	95.9	141.8	50.4		Peak Found	High	High	Peak Found	High	0.0001346	0.002563	3.83	41.3
FALSE	High	[R].AVLVDLEPGTMDSVR.[S]	R	1xAcetyl [N-Term]	P04350 1xAcetyl [N-Term]; Q3ZCM7 1xAcetyl [N-Term]; P68371 1xAcetyl [N-Term]	FALSE	0.00368576	0	1	3	38	Q3ZCM7	P04350 [63-77]; Q3ZCM7 [63-77]; P68371 [63-77]	0	1643.83	0	0.57	0.672	0.639	0.87306	0.950033	0.919342	0	0	0	138.9	79.1	93.3	88.7		High	High	High	High	High	0.0002176	0.003978	2.53	65.45
FALSE	High	[E].AVLLQTPAQAGEEPLGVGSVAAGGR.[Y]	E	1xAcetyl:2H(3) [N-Term]	P12081 1xAcetyl:2H(3) [N-Term]	FALSE	0.000694911	0	1	1	7	P12081	P12081 [338-362]	0	2393.29	0	30.038	31.67	40.775	3.87016e-07	7.48323e-05	3.59651e-12	0	0	0	3.9	116.1	122.4	157.6		Peak Found	High	High	High	High	0	2.015e-06	4.13	60.04
FALSE	High	[E].AVILLQEIGVLDQR.[E]	E	1xAcetyl:2H(3) [N-Term]	Q7L2E3 1xAcetyl:2H(3) [N-Term]	FALSE	0.0249412	0	1	1	3	Q7L2E3	Q7L2E3 [851-864]	0	1611.95	0	100	100	100	4.34403e-17	3.7678e-17	4.94188e-17					111.3	180.6	108.1		Not Found	Peak Found	High	High	High	0	0.0009089	3.1	91.14
FALSE	High	[R].VKELQAEQEDR.[A]	R	1xAcetyl:2H(3) [K2]	Q00341 1xAcetyl:2H(3) [K1039]	FALSE	0.0123337	0	1	1	4	Q00341	Q00341 [1038-1048]	0	1389.7	0	0.557	0.322	1.245	0.939746	0.818357	0.877822	0	0	0	128.1	71.3	41.2	159.4		Peak Found	Peak Found	High	High	High	0.0002176	0.00386	4.04	21.38
FALSE	High	[M].AVLAPLIALVYSVPR.[L]	M	1xAcetyl:2H(3) [N-Term]	Q9Y320 1xAcetyl:2H(3) [N-Term]	FALSE	0.0039661	0	1	1	10	Q9Y320	Q9Y320 [2-16]	0	1627	0	0.771	0.842	0.934	0.988164	0.983998	0.956839	0	0	0	112.8	87	95	105.3		High	High	High	High	High	0	4.95e-05	4.06	102.75
FALSE	High	[R].VKENDQKKKEAKEKGTWVQLKR.[Q]	R	7xAcetyl:2H(3) [K2; K7; K8; K9; K12; K14; K21]	P46778 7xAcetyl:2H(3) [K110; K115; K116; K117; K120; K122; K129]	FALSE	0.000400828	0	1	1	8	P46778	P46778 [109-130]	0	2985.71	0	0.418	0.54	0.637	0.810639	0.959081	0.963108	0	0	0	154.1	64.4	83.2	98.2		High	Peak Found	Peak Found	Peak Found	High	0	1.824e-05	4.43	48.87
FALSE	High	[R].AVFVDLEPTVIDEVR.[T]	R			FALSE	0.00142081	0	1	3	11	P68363	Q71U36 [65-79]; P68363 [65-79]; Q9BQE3 [65-79]	0	1701.91	0	5.293	6.435	7.812	0.0383433	0.0973968	0.00082796	0	0	0	19.5	103.1	125.3	152.1		Peak Found	High	High	Peak Found	High	0	3.447e-05	4.87	56.7
FALSE	High	[M].ASSSGNDDDLTIPR.[A]	M	1xAcetyl [N-Term]	Q01658 1xAcetyl [N-Term]	FALSE	0.0123337	0	1	1	3	Q01658	Q01658 [2-15]	0	1489.68	0	0.42	0.613	0.01	0.892728	0.99998	4.94188e-17	0	0		196.7	82.6	120.7			High	Peak Found	Peak Found	Not Found	High	0	0.00027	1.57	35.85
FALSE	High	[E].VKSTNGDTFLGGEDFDQALLR.[H]	E	1xAcetyl:2H(3) [K2]; 1xAcetyl:2H(3) [N-Term]	P38646 1xAcetyl:2H(3) [K265]; 1xAcetyl:2H(3) [N-Term]	FALSE	0.000196005	0	1	1	4	P38646	P38646 [264-284]	0	2373.18	0	100		100	4.34403e-17		4.94188e-17					178.7		221.3		Not Found	High	Not Found	Peak Found	High	0	8.078e-05	3.67	66.78
FALSE	High	[M].ASSDIQVKELEKR.[A]	M	1xAcetyl [N-Term]; 2xAcetyl:2H(3) [K8; K12]	P16949 1xAcetyl [N-Term]; 2xAcetyl:2H(3) [K9; K13]	FALSE	0.00129634	0	1	1	32	P16949	P16949 [2-14]	0	1634.89	0	0.327	0.414	0.319	0.195885	0.362871	0.127062	0	0	0	194.2	63.4	80.4	61.9		High	High	High	High	High	0	0.0007563	4.22	43.24
FALSE	High	[M].AQLGKLLKEQKYDR.[Q]	M	1xAcetyl [N-Term]; 3xAcetyl:2H(3) [K5; K8; K11]	Q13564 1xAcetyl [N-Term]; 3xAcetyl:2H(3) [K6; K9; K12]	FALSE	0.00112633	0	1	1	5	Q13564	Q13564 [2-15]	0	1867.06	0	0.408	0.067	0.503	0.452942	0.00142628	0.65182	0	0	0	202.2	82.5	13.5	101.7		High	High	Peak Found	High	High	0	4.613e-06	5.53	63.06
FALSE	High	[M].AQDQGEKENPMR.[E]	M	1xAcetyl [N-Term]; 1xOxidation [M11]; 1xAcetyl:2H(3) [K7]	P62913 1xAcetyl [N-Term]; 1xOxidation [M12]; 1xAcetyl:2H(3) [K8]	FALSE	0.00757538	0	1	1	13	P62913	P62913 [2-13]	0	1505.67	0	0.739	0.785	0.893	0.994056	0.99333	0.963465	0	0	0	117.1	86.5	91.9	104.5		Peak Found	High	High	High	High	0	0.0001183	3.34	18.34
FALSE	High	[M].AQDQGEKENPMR.[E]	M	1xAcetyl [N-Term]; 1xAcetyl:2H(3) [K7]	P62913 1xAcetyl [N-Term]; 1xAcetyl:2H(3) [K8]	FALSE	0.00712709	0	1	1	90	P62913	P62913 [2-13]	0	1489.68	0	0.842	1.113	0.677	0.988164	0.841795	0.91985	0	0	0	110.1	92.7	122.6	74.5		High	High	High	High	High	6.911e-05	0.002157	3.6	25.44
FALSE	High	[E].AQALLSGDTQTDATSFYDR.[V]	E	1xAcetyl:2H(3) [N-Term]	P14314 1xAcetyl:2H(3) [N-Term]	FALSE	0.00265	0	1	1	3	P14314	P14314 [253-271]	0	2104.99	0	3.68	7.19	6.968	0.140243	0.172436	0.0479529	0	0	0	21.2	78.1	152.7	148		Peak Found	Peak Found	Peak Found	High	High	0	1.978e-05	2.8	54.98
FALSE	High	[E].AQALGLEVFHAGTALKNGKVVTHGGR.[V]	E	2xAcetyl:2H(3) [K16; K19]; 1xAcetyl:2H(3) [N-Term]	P22102 2xAcetyl:2H(3) [K375; K378]; 1xAcetyl:2H(3) [N-Term]	FALSE	9.19106e-07	0	1	1	9	P22102	P22102 [360-385]	0	2766.54	0	100	100	100	4.34403e-17	3.7678e-17	4.94188e-17					117.1	159.2	123.7		Not Found	High	High	High	High	0	2.55e-11	6.63	63.74
FALSE	High	[M].AQAKINAKANEGR.[F]	M	1xAcetyl [N-Term]; 2xAcetyl:2H(3) [K4; K8]	O95816 1xAcetyl [N-Term]; 2xAcetyl:2H(3) [K5; K9]	FALSE	0.00184786	0	1	1	14	O95816	O95816 [2-14]	0	1502.82	0	0.499	0.51	0.719	0.637655	0.601025	0.961821	0	0	0	146.6	73.2	74.8	105.4		High	High	High	High	High	0	0.0003581	4.48	34.15
FALSE	High	[M].APSGLKAVVGEKILSGVIR.[S]	M	2xAcetyl:2H(3) [K6; K12]; 1xAcetyl:2H(3) [N-Term]	Q15833 2xAcetyl:2H(3) [K7; K13]; 1xAcetyl:2H(3) [N-Term]	FALSE	0.00310625	0	1	1	4	Q15833	Q15833 [2-20]	0	2029.24	0	0.042	0.511	0.686	0.0135075	0.963945	0.966123	0	0	0	178.6	7.5	91.3	122.6		High	Peak Found	High	Peak Found	High	0	0.0001249	3.8	81.35
FALSE	High	[E].VLKTALIHDGLAR.[G]	E	1xAcetyl:2H(3) [K3]; 1xAcetyl:2H(3) [N-Term]	P25398 1xAcetyl:2H(3) [K23]; 1xAcetyl:2H(3) [N-Term]	FALSE	0.00123448	0	1	1	1	P25398	P25398 [21-33]	0	1496.91	0	36.562	24.335	39.572	4.07853e-05	0.017828	1.88822e-05	0	0	0	3.9	144.1	95.9	156		Peak Found	Peak Found	Peak Found	High	High	0	5.337e-06	4.26	60.23
FALSE	High	[R].VLIAAHGNSLR.[G]	R	1xAcetyl:2H(3) [N-Term]	P18669 1xAcetyl:2H(3) [N-Term]; P15259 1xAcetyl:2H(3) [N-Term]	FALSE	0.0100886	0	1	2	3	P18669	P18669 [181-191]; P15259 [181-191]	0	1195.7	0	0.815	0.938	0.854	0.976309	0.955793	0.985609	0	0	0	110.9	90.4	104	94.7		Peak Found	High	Peak Found	High	High	0	0.0001921	3.75	39.36
FALSE	High	[M].APKFPDSVEELR.[A]	M	1xAcetyl:2H(3) [K3]; 1xAcetyl:2H(3) [N-Term]	Q15785 1xAcetyl:2H(3) [K4]; 1xAcetyl:2H(3) [N-Term]	FALSE	0.0266579	0	1	1	1	Q15785	Q15785 [2-13]	0	1477.78	0	0.146	0.534	0.128	0.179227	0.961085	0.0747712	0	0	0	221.2	32.3	118.1	28.4		High	Peak Found	Peak Found	Peak Found	High	0	0.001011	1.57	51.66
FALSE	High	[M].APKAKKEAPAPPKAEAKAKALKAKKAVLKGVHSHKKKKIR.[T]	M	1xAcetyl [N-Term]; 14xAcetyl:2H(3) [K3; K5; K6; K13; K17; K19; K22; K24; K25; K29; K35; K36; K37; K38]	P62750 1xAcetyl [N-Term]; 14xAcetyl:2H(3) [K4; K6; K7; K14; K18; K20; K23; K25; K26; K30; K36; K37; K38; K39]	FALSE	7.46582e-07	0	1	1	13	P62750	P62750 [2-41]	0	4953.1	0	1.044	1.266	0.64	0.874274	0.703744	0.888312	0	0	0	101.3	105.8	128.2	64.8		High	High	High	High	High	0	2.809e-08	4.89	65.2
FALSE	High	[M].APGQLALFSVSDKTGLVEFAR.[N]	M	1xAcetyl:2H(3) [K13]; 1xAcetyl:2H(3) [N-Term]	P31939 1xAcetyl:2H(3) [K14]; 1xAcetyl:2H(3) [N-Term]	FALSE	0.000578462	0	1	1	12	P31939	P31939 [2-22]	0	2296.25	0	0.024	0.288	0.548	1.78388e-05	0.455144	0.844778	0	0	0	215.1	5.1	62	117.9		High	High	Peak Found	Peak Found	High	0	1.475e-06	3.49	76.02
FALSE	High	[V].APGKGILAADESTGSIAKR.[L]	V	2xAcetyl:2H(3) [K4; K18]	P04075 2xAcetyl:2H(3) [K28; K42]	FALSE	0.00119002	0	1	1	4	P04075	P04075 [25-43]	0	1932.07	0	0.842	0.85	0.807	0.960927	0.961244	0.993401	0	0	0	114.3	96.3	97.2	92.2		Peak Found	High	Peak Found	High	High	0	0.0001441	4.27	57.59
FALSE	High	[M].VLLESEQFLTELTR.[L]	M	1xAcetyl:2H(3) [N-Term]	P37108 1xAcetyl:2H(3) [N-Term]	FALSE	0.000537542	0	1	1	52	P37108	P37108 [2-15]	0	1722.94	0	1.082	1.274	1.103	0.849702	0.698769	0.807223	0	0	0	89.7	97.1	114.3	98.9		High	High	High	High	High	0	5.874e-05	4.26	92.41
FALSE	High	[SF].APAPKKGSKKAVTKAQKKDGKKR.[K]	S	9xAcetyl:2H(3) [K5; K6; K9; K10; K14; K17; K18; K21; K22]; 1xAcetyl:2H(3) [N-Term]	Q16778 9xAcetyl:2H(3) [K12; K13; K16; K17; K21; K24; K25; K28; K29]; 1xAcetyl:2H(3) [N-Term]; Q6DN03 9xAcetyl:2H(3) [K12; K13; K16; K17; K21; K24; K25; K28; K29]; 1xAcetyl:2H(3) [N-Term]; P58876 9xAcetyl:2H(3) [K12; K13; K16; K17; K21; K24; K25; K28; K29]; 1xAcetyl:2H(3) [N-Term]; Q93079 9xAcetyl:2H(3) [K12; K13; K16; K17; K21; K24; K25; K28; K29]; 1xAcetyl:2H(3) [N-Term]; O60814 9xAcetyl:2H(3) […	FALSE	0.00288666	0	7	12	1	Q6DN03; P58876; O60814; Q99880; Q8N257; P23527; Q99877	Q16778 [8-30]; Q6DN03 [8-30]; P58876 [8-30]; Q93079 [8-30]; O60814 [8-30]; Q99880 [8-30]; Q6DRA6 [8-30]; P62807 [8-30]; Q8N257 [8-30]; P06899 [8-30]; P23527 [8-30]; Q99877 [8-30]	0	2900.8	0	0.396	0.399	0.795	0.87306	0.927688	0.997471	0	0	0	154.5	61.2	61.6	122.7	Shared	High	Peak Found	Peak Found	Peak Found	High	0	2.281e-05	3.21	41.52
FALSE	High	[M].APAKKGGEKKKGR.[S]	M	5xAcetyl:2H(3) [K4; K5; K9; K10; K11]; 1xAcetyl:2H(3) [N-Term]	P62899 5xAcetyl:2H(3) [K5; K6; K10; K11; K12]; 1xAcetyl:2H(3) [N-Term]	FALSE	0.0109199	0	1	1	3	P62899	P62899 [2-14]	0	1625	0	0.703	0.685	0.733	0.935955	0.90453	0.965626	0	0	0	128.1	90.1	87.7	94		High	High	High	Peak Found	High	0	0.0002208	2.75	26.54
FALSE	High	[M].APAEILNGKEISAQIR.[A]	M	1xAcetyl:2H(3) [K9]; 1xAcetyl:2H(3) [N-Term]	P11586 1xAcetyl:2H(3) [K10]; 1xAcetyl:2H(3) [N-Term]	FALSE	0.000264476	0	1	1	16	P11586	P11586 [2-17]	0	1800.01	0	0.875	0.517	1.121	0.973466	0.615001	0.789052	0	0	0	113.9	99.6	58.8	127.7		High	High	High	Peak Found	High	0	2.442e-05	4.21	58.24
FALSE	High	[E].VLLGALPGAGGTQR.[L]	E	1xAcetyl:2H(3) [N-Term]	P40939 1xAcetyl:2H(3) [N-Term]	FALSE	0.00234516	0	1	1	8	P40939	P40939 [174-187]	0	1354.79	0	51.458	40.618	35.358	1.16627e-07	0.00117838	4.14457e-07	0	0	0	3.1	160.3	126.5	110.1		Peak Found	High	High	High	High	0	1.6e-05	3.5	58.88
FALSE	High	[R].VLIGVGKLLR.[V]	R	1xAcetyl:2H(3) [K7]; 1xAcetyl:2H(3) [N-Term]	Q15393 1xAcetyl:2H(3) [K965]; 1xAcetyl:2H(3) [N-Term]	FALSE	0.0211779	0	1	1	5	Q15393	Q15393 [959-968]	0	1157.79	0	100	100	100	4.34403e-17	3.7678e-17	4.94188e-17					95.7	147.7	156.6		Not Found	High	Peak Found	High	High	0	0.0009736	3.32	78.11
FALSE	High	[E].VLLISAEQDKR.[A]	E	1xAcetyl:2H(3) [K10]; 1xAcetyl:2H(3) [N-Term]	Q00341 1xAcetyl:2H(3) [K221]; 1xAcetyl:2H(3) [N-Term]	FALSE	0.023334	0	1	1	21	Q00341	Q00341 [212-222]	0	1361.79	0	37.092	28.133	29.905	6.21165e-06	0.0198629	2.10628e-06	0	0	0	4.2	154.3	117.1	124.4		Peak Found	High	High	High	High	0.0002176	0.006446	4.17	59.11
FALSE	High	[R].AMKQVAGTMKLELAQYR.[E]	R	2xAcetyl:2H(3) [K3; K10]; 1xAcetyl:2H(3) [N-Term]	P25705 2xAcetyl:2H(3) [K427; K434]; 1xAcetyl:2H(3) [N-Term]	FALSE	0.0151667	0	1	1	2	P25705	P25705 [425-441]	0	2073.12	0	100	100	100	4.34403e-17	3.7678e-17	4.94188e-17					127.3	126.6	146.1		Not Found	High	Peak Found	Peak Found	High	0	0.0003866	4.36	73.77
FALSE	High	[K].AMGIMNSFVNDIFER.[I]	K	1xAcetyl:2H(3) [N-Term]	Q16778 1xAcetyl:2H(3) [N-Term]; Q5QNW6 1xAcetyl:2H(3) [N-Term]; Q99879 1xAcetyl:2H(3) [N-Term]; P33778 1xAcetyl:2H(3) [N-Term]; P58876 1xAcetyl:2H(3) [N-Term]; Q93079 1xAcetyl:2H(3) [N-Term]; O60814 1xAcetyl:2H(3) [N-Term]; Q99880 1xAcetyl:2H(3) [N-Term]; P62807 1xAcetyl:2H(3) [N-Term]; P57053 1xAcetyl:2H(3) [N-Term]; Q8N257 1xAcetyl:2H(3) [N-Term]; P06899 1xAcetyl:2H(3) [N-Term]; P23527 1xAcetyl…	FALSE	0.00615614	0	8	14	7	Q5QNW6; P33778; P58876; O60814; Q99880; Q8N257; P23527; Q99877	Q16778 [59-73]; Q5QNW6 [59-73]; Q99879 [59-73]; P33778 [59-73]; P58876 [59-73]; Q93079 [59-73]; O60814 [59-73]; Q99880 [59-73]; P62807 [59-73]; P57053 [59-73]; Q8N257 [59-73]; P06899 [59-73]; P23527 [59-73]; Q99877 [59-73]	0	1788.85	0	0.01	1.618	4.228	4.34403e-17	0.731813	0.0944017		0	0	58.4		94.5	247.1	Shared	Peak Found	Not Found	High	High	High	0.0002176	0.004041	3.78	91.73
FALSE	High	[E].AMAIDTLLISDELFR.[H]	E	1xAcetyl:2H(3) [N-Term]	Q9BRX2 1xAcetyl:2H(3) [N-Term]	FALSE	0.0230531	0	1	1	4	Q9BRX2	Q9BRX2 [305-319]	0	1752.93	0		100	100		3.7678e-17	4.94188e-17						83	317		Not Found	Not Found	High	Peak Found	High	0	0.001016	3.46	94.37
FALSE	High	[E].AQVYILSKEEGGR.[H]	E	1xAcetyl:2H(3) [K8]; 1xAcetyl:2H(3) [N-Term]	P49411 1xAcetyl:2H(3) [K361]; 1xAcetyl:2H(3) [N-Term]	FALSE	0.0207962	0	1	1	1	P49411	P49411 [354-366]	0	1539.83	0	20.686	15.703	13.623	0.000309933	0.0454989	0.00392763	0	0	0	7.8	162.2	123.1	106.8		Peak Found	Peak Found	Peak Found	High	High	0	0.0006638	3.47	51.33
FALSE	High	[M].AQWNQLQQLDTR.[Y]	M	1xAcetyl [N-Term]	P40763 1xAcetyl [N-Term]	FALSE	0.0225011	0	1	1	2	P40763	P40763 [2-13]	0	1542.77	0	1.005	0.201	0.749	0.893993	0.595275	0.987852	0	0	0	135.4	136	27.2	101.4		Peak Found	High	High	Peak Found	High	0	0.000758	3.34	50.02
FALSE	High	[R].AREETDKEEPASKQQKTENGAGDQ.[-]	R	3xAcetyl:2H(3) [K7; K13; K16]	P05455 3xAcetyl:2H(3) [K391; K397; K400]	FALSE	4.68675e-05	0	1	1	29	P05455	P05455 [385-408]	1	2781.31	0	0.649	0.484	1.103	0.977286	0.94708	0.88677	0	0	0	123.6	80.2	59.8	136.4		High	High	High	High	High	0	2.059e-08	6.59	21.78
FALSE	High	[R].VLKKNPLKNLR.[I]	R	3xAcetyl:2H(3) [K3; K4; K8]; 1xAcetyl:2H(3) [N-Term]	P36578 3xAcetyl:2H(3) [K315; K316; K320]; 1xAcetyl:2H(3) [N-Term]	FALSE	0.0216976	0	1	1	4	P36578	P36578 [313-323]	0	1502.98	0	2.398	0.288	1.224	0.33641	0.833855	0.862005	0	0	0	81.5	195.3	23.5	99.7		Peak Found	High	Peak Found	Peak Found	High	0	0.0007101	3.73	62.03
FALSE	High	[M].ASPSLERPEKGAGKSEFR.[N]	M	1xAcetyl [N-Term]; 2xAcetyl:2H(3) [K10; K14]	Q13601 1xAcetyl [N-Term]; 2xAcetyl:2H(3) [K11; K15]	FALSE	0.00188205	0	1	1	1	Q13601	Q13601 [2-19]	0	2078.08	0	0.243	0.682	0.222	0.447375	0.976279	0.288014	0	0	0	186.4	45.3	127	41.3		High	Peak Found	Peak Found	Peak Found	High	0	1.101e-05	4.54	34.77
FALSE	High	[M].ASNKTTLQKMGKKQNGKSKKVEEAEPEEFVVEKVLDRR.[V]	M	1xAcetyl [N-Term]; 8xAcetyl:2H(3) [K4; K9; K12; K13; K17; K19; K20; K33]	Q13185 1xAcetyl [N-Term]; 8xAcetyl:2H(3) [K5; K10; K13; K14; K18; K20; K21; K34]	FALSE	0.000931895	0	1	1	11	Q13185	Q13185 [2-39]	1	4761.59	0	0.241	0.296	0.404	0.0645704	0.114966	0.328503	0	0	0	206.1	49.7	61	83.3		High	High	Peak Found	High	High	0	3.31e-06	4.22	68.46
FALSE	High	[M].ASMGTLAFDEYGRPFLIIKDQDR.[K]	M	1xAcetyl [N-Term]; 1xAcetyl:2H(3) [K19]	P48643 1xAcetyl [N-Term]; 1xAcetyl:2H(3) [K20]	FALSE	3.73781e-05	0	1	1	8	P48643	P48643 [2-24]	0	2730.36	0	0.686	0.582	0.589	0.926333	0.756716	0.807887	0	0	0	140	96.1	81.5	82.4		High	High	Peak Found	High	High	0	1.402e-08	4.81	71.35
FALSE	High	[E].VLEEENLAENADKLGIILR.[N]	E	1xAcetyl:2H(3) [K13]; 1xAcetyl:2H(3) [N-Term]	P04181 1xAcetyl:2H(3) [K351]; 1xAcetyl:2H(3) [N-Term]	FALSE	0.0013613	0	1	1	2	P04181	P04181 [339-357]	0	2229.22	0	100	100	100	4.34403e-17	3.7678e-17	4.94188e-17					32.4	126.9	240.7		Not Found	High	Peak Found	High	High	0	6.355e-06	2.7	77.54
FALSE	High	[R].ASITPGTILIILTGR.[H]	R			FALSE	0.000824649	0	1	1	10	Q02878	Q02878 [142-156]	0	1525.93	0	1.56	1.583	0.776	0.662072	0.796323	0.99558	0	0	0	81.3	126.9	128.7	63.1		High	High	High	High	High	0	0.0001414	4.37	75.6
FALSE	High	[M].ASLSLAPVNIFKAGADEER.[A]	M	1xAcetyl [N-Term]; 1xAcetyl:2H(3) [K12]	P78371 1xAcetyl [N-Term]; 1xAcetyl:2H(3) [K13]	FALSE	6.72277e-05	0	1	1	10	P78371	P78371 [2-20]	0	2075.08	0	0.397	0.201	0.568	0.368235	0.0192331	0.768141	0	0	0	184.7	73.4	37.1	104.8		Peak Found	High	High	High	High	0	1.522e-07	5.29	70.31
FALSE	High	[M].ASLLKVDQEVKLKVDSFR.[E]	M	1xAcetyl [N-Term]; 3xAcetyl:2H(3) [K5; K11; K13]	P61289 1xAcetyl [N-Term]; 3xAcetyl:2H(3) [K6; K12; K14]	FALSE	0.000282877	0	1	1	28	P61289	P61289 [2-19]	0	2252.28	0	0.434	0.608	0.378	0.466493	0.803244	0.258043	0	0	0	165.3	71.7	100.5	62.5		High	High	High	High	High	0	2.494e-06	5.68	85.97
FALSE	High	[M].ASLFKKKTVDDVIKEQNR.[E]	M	1xAcetyl [N-Term]; 4xAcetyl:2H(3) [K5; K6; K7; K14]	Q9UQN3 1xAcetyl [N-Term]; 4xAcetyl:2H(3) [K6; K7; K8; K15]	FALSE	2.11667e-05	0	1	1	7	Q9UQN3	Q9UQN3 [2-19]	0	2341.32	0	1.097	2.708	3.543	0.869099	0.469673	0.0844903	0	0	0	47.9	52.5	129.8	169.8		Peak Found	High	High	Peak Found	High	0	5.297e-09	6.23	67.07
FALSE	High	[M].ASKEMFEDTVEER.[V]	M	1xAcetyl [N-Term]; 1xAcetyl:2H(3) [K3]	Q16576 1xAcetyl [N-Term]; 1xAcetyl:2H(3) [K4]	FALSE	0.00541544	0	1	1	19	Q16576	Q16576 [2-14]	0	1657.75	0	0.079	0.137	0.099	0.00407068	0.0601308	0.00209454	0	0	0	304.2	24.1	41.8	30		High	High	High	High	High	0	0.0006915	2.13	50.4
FALSE	High	[M].ASGVTVNDEVIKVFNDMKVR.[K]	M	1xAcetyl [N-Term]; 2xAcetyl:2H(3) [K12; K18]	Q9Y281 1xAcetyl [N-Term]; 2xAcetyl:2H(3) [K13; K19]	FALSE	6.76401e-05	0	1	1	9	Q9Y281	Q9Y281 [2-21]	0	2353.23	0	0.398	0.597	0.632	0.734138	0.925708	0.925765	0	0	0	152.3	60.6	90.9	96.2		High	High	High	High	High	0	3.831e-08	4.99	77.02
FALSE	High	[M].ASGVAVSDGVIKVFNDMKVR.[K]	M	1xAcetyl [N-Term]; 1xOxidation [M17]; 2xAcetyl:2H(3) [K12; K18]	P23528 1xAcetyl [N-Term]; 1xOxidation [M18]; 2xAcetyl:2H(3) [K13; K19]	FALSE	4.14726e-05	0	1	1	7	P23528	P23528 [2-21]	0	2240.19	0	0.805	0.684	0.699	0.989475	0.956392	0.964776	0	0	0	125.5	101.1	85.8	87.7		High	High	High	High	High	0	1.666e-08	5.89	61.46
FALSE	High	[E].VGKVAEKEGWPLDIR.[V]	E	2xAcetyl:2H(3) [K3; K7]; 1xAcetyl:2H(3) [N-Term]	Q99798 2xAcetyl:2H(3) [K366; K370]; 1xAcetyl:2H(3) [N-Term]	FALSE	0.00152893	0	1	1	3	Q99798	Q99798 [364-378]	0	1832.03	0	100	100	100	4.34403e-17	3.7678e-17	4.94188e-17					147	94.2	158.7		Not Found	Peak Found	High	High	High	0	7.691e-06	5.29	66.35
FALSE	High	[M].ASGVAVSDGVIKVFNDMKVR.[K]	M	1xAcetyl [N-Term]; 2xAcetyl:2H(3) [K12; K18]	P23528 1xAcetyl [N-Term]; 2xAcetyl:2H(3) [K13; K19]	FALSE	3.5812e-05	0	1	1	223	P23528	P23528 [2-21]	0	2224.19	0	0.458	0.704	0.56	0.527873	0.925708	0.751034	0	0	0	146.9	67.3	103.5	82.3		High	High	High	High	High	0	1.967e-07	6.11	75.04
FALSE	High	[M].VLESVVADLLNR.[F]	M	1xAcetyl:2H(3) [N-Term]	Q709C8 1xAcetyl:2H(3) [N-Term]	FALSE	0.00525261	0	1	1	8	Q709C8	Q709C8 [2-13]	0	1372.79	0	0.529	0.769	0.878	0.930218	0.981674	0.987815	0	0	0	126	66.6	96.8	110.6		High	High	Peak Found	High	High	0	0.001083	4.01	93.13
FALSE	High	[M].ASGGGVPTDEEQATGLER.[E]	M	1xAcetyl:2H(3) [N-Term]	P10606 1xAcetyl:2H(3) [N-Term]	FALSE	0.00518885	0	1	1	4	P10606	P10606 [32-49]	0	1818.85	0	0.401	0.341	0.561	0.749298	0.690066	0.869727	0	0	0	173.7	69.6	59.2	97.5		High	High	High	Peak Found	High	0	6.18e-05	2.9	33.79
FALSE	High	[F].ASGANFEYIIAEKR.[G]	F	1xAcetyl:2H(3) [K13]; 1xAcetyl:2H(3) [N-Term]	P30084 1xAcetyl:2H(3) [K40]; 1xAcetyl:2H(3) [N-Term]	FALSE	0.00646417	0	1	1	13	P30084	P30084 [28-41]	0	1658.87	0	0.495	0.633	0.609	0.626694	0.842842	0.845203	0	0	0	146.2	72.3	92.6	88.9		High	High	High	High	High	0	8.996e-05	3.45	56.57
FALSE	High	[M].ASGADSKGDDLSTAILKQKNRPNR.[L]	M	1xAcetyl [N-Term]; 3xAcetyl:2H(3) [K7; K17; K19]	P55072 1xAcetyl [N-Term]; 3xAcetyl:2H(3) [K8; K18; K20]	FALSE	0.000984601	0	1	1	3	P55072	P55072 [2-25]	0	2719.43	0	0.185	0.275	0.302	0.0149417	0.0857489	0.0988336	0	0	0	226.9	42.1	62.5	68.5		High	Peak Found	High	Peak Found	High	0	3.64e-06	2.77	47.79
FALSE	High	[M].ASFVTEVLAHSGR.[L]	M	1xAcetyl [N-Term]	O43264 1xAcetyl [N-Term]	FALSE	0.00165537	0	1	1	1	O43264	O43264 [2-14]	0	1415.73	0	0.01	0.01	0.01	4.34403e-17	3.7678e-17	4.94188e-17				400					High	Not Found	Not Found	Not Found	High	0	8.869e-06	5.01	64.36
FALSE	High	[M].ASEELQKDLEEVKVLLEKATR.[K]	M	1xAcetyl [N-Term]; 3xAcetyl:2H(3) [K7; K13; K18]	Q9HB71 1xAcetyl [N-Term]; 3xAcetyl:2H(3) [K8; K14; K19]	FALSE	6.88923e-05	0	1	1	48	Q9HB71	Q9HB71 [2-22]	0	2605.43	0	0.559	0.176	0.24	0.769269	0.00925026	0.0283834	0	0	0	202.5	113.2	35.7	48.5		High	High	High	High	High	0	0.001104	4.73	101.51
FALSE	High	[M].ASAVSPANLPAVLLQPR.[W]	M	1xAcetyl [N-Term]	P51610 1xAcetyl [N-Term]	FALSE	0.0143593	0	1	1	9	P51610	P51610 [2-18]	0	1745.99	0	100	100	100	4.34403e-17	3.7678e-17	4.94188e-17					167.3	130.9	101.9		Not Found	Peak Found	High	Peak Found	High	6.911e-05	0.001823	3.56	65.03
FALSE	High	[M].ASASTQPAALSAEQAKVVLAEVIQAFSAPENAVR.[M]	M	1xAcetyl [N-Term]; 1xAcetyl:2H(3) [K16]	Q99622 1xAcetyl [N-Term]; 1xAcetyl:2H(3) [K17]	FALSE	0.0181979	0	1	1	4	Q99622	Q99622 [2-35]	0	3511.85	0	1.138	1.406	2.145	0.829678	0.789351	0.508224	0	0	0	70.3	80	98.9	150.8		High	High	High	Peak Found	High	0	0.0005241	2.74	99.8
FALSE	High	[H].ASASSTNLKDILADLIPKEQAR.[I]	H	2xAcetyl:2H(3) [K9; K18]; 1xAcetyl:2H(3) [N-Term]	O75390 2xAcetyl:2H(3) [K34; K43]; 1xAcetyl:2H(3) [N-Term]	FALSE	0.00142952	0	1	1	3	O75390	O75390 [26-47]	0	2476.36	0	0.042	0.199	0.302	8.1243e-08	0.0179806	0.0980598	0	0	0	259.4	10.8	51.5	78.2		High	High	Peak Found	Peak Found	High	0	6.883e-06	4.81	81.6
FALSE	High	[M].ASALEQFVNSVR.[Q]	M	1xAcetyl [N-Term]	Q9UNS2 1xAcetyl [N-Term]	FALSE	0.00920742	0	1	1	19	Q9UNS2	Q9UNS2 [2-13]	0	1362.7	0	0.874	0.882	0.861	0.973466	0.980349	0.985138	0	0	0	110.6	96.7	97.5	95.3		High	High	High	High	High	0.0002176	0.004303	3.87	71.93
FALSE	High	[M].ASAGDTQAGPR.[D]	M	1xAcetyl [N-Term]	O95716 1xAcetyl [N-Term]	FALSE	0.0286639	0	1	1	11	O95716	O95716 [2-12]	0	1072.5	0	0.766	1.276	0.497	0.973581	0.839949	0.840119	0	0	0	113	86.5	144.2	56.2		High	High	High	High	High	0.0002176	0.005879	2.22	16.3
FALSE	High	[M].ASGRPEELWEAVVGAAER.[F]	M	1xAcetyl [N-Term]	Q96B36 1xAcetyl [N-Term]	FALSE	0.000333653	0	1	1	11	Q96B36	Q96B36 [2-19]	0	1968.98	0	0.39	0.42	0.495	0.76089	0.825842	0.81069	0	0	0	173.5	67.8	72.8	85.9		High	Peak Found	Peak Found	High	High	0	5.102e-06	5.94	66.12
FALSE	High	[R].VGKETVQTTEDQILKR.[D]	R	2xAcetyl:2H(3) [K3; K15]	P18206 2xAcetyl:2H(3) [K59; K71]	FALSE	0.00459228	0	1	1	2	P18206	P18206 [57-72]	0	1935.07	0	0.758	0.094	1.091	0.977205	0.303803	0.903963	0	0	0	136	103	12.7	148.3		Peak Found	Peak Found	Peak Found	High	High	0	5.012e-05	5.07	43.22
FALSE	High	[E].CVQMTQDVQKAMDER.[R]	E	1xCarbamidomethyl [C1]; 1xAcetyl:2H(3) [K10]	Q01813 1xCarbamidomethyl [C360]; 1xAcetyl:2H(3) [K369]	FALSE	0.00725873	0	1	1	1	Q01813	Q01813 [360-374]	0	1883.85	0	100	100		4.34403e-17	3.7678e-17						254.8	145.2			Not Found	High	Peak Found	Not Found	High	0	0.0001094	3.41	61.34
FALSE	High	[R].DAAGSGDKPGADTGR.[-]	R	1xAcetyl:2H(3) [K8]	Q96EL3 1xAcetyl:2H(3) [K105]	FALSE	0.000377054	0	1	1	8	Q96EL3	Q96EL3 [98-112]	0	1419.65	0	0.698	0.391	0.652	0.990364	0.923753	0.953187	0	0	0	145.9	101.9	57.1	95.1		High	High	Peak Found	Peak Found	High	0	3.044e-06	4.64	17.29
FALSE	High	[R].EAVEKEFEPLLNWMKDKALKDKIEKAVVSQR.[L]	R	6xAcetyl:2H(3) [K5; K15; K17; K20; K22; K25]	P14625 6xAcetyl:2H(3) [K613; K623; K625; K628; K630; K633]	FALSE	0.0268196	0	1	1	2	P14625	P14625 [609-639]	0	3942.16	0	0.01	0.01	0.01	4.34403e-17	3.7678e-17	4.94188e-17				400					High	Not Found	Not Found	Not Found	High	0	0.001029	3.68	89.66
FALSE	High	[R].EAVEKEFEPLLNWMKDKALKDKIEKAVVSQR.[L]	R	1xGlu->pyro-Glu [N-Term]; 6xAcetyl:2H(3) [K5; K15; K17; K20; K22; K25]	P14625 1xGlu->pyro-Glu [N-Term]; 6xAcetyl:2H(3) [K613; K623; K625; K628; K630; K633]	FALSE	0.000288114	0	1	1	4	P14625	P14625 [609-639]	0	3924.15	0	0.498	0.01	0.046	0.944711	3.7678e-17	0.000946889	0		0	259.1	129		11.9		High	High	Not Found	Peak Found	High	0	4.503e-07	4.39	96.96
FALSE	High	[IM].EAVAAQGKAKK.[-]	I	1xGlu->pyro-Glu [N-Term]; 3xAcetyl:2H(3) [K8; K10; K11]	Q8N0Y7 1xGlu->pyro-Glu [N-Term]; 3xAcetyl:2H(3) [K251; K253; K254]; P18669 1xGlu->pyro-Glu [N-Term]; 3xAcetyl:2H(3) [K251; K253; K254]	FALSE	0.0107222	0	1	2	4	P18669	Q8N0Y7 [244-254]; P18669 [244-254]	0	1217.72	0	0.568	0.994	0.716	0.950883	0.943	0.985609	0	0	0	122.1	69.3	121.3	87.4		High	High	High	Peak Found	High	0	0.0005443	2.77	28.19
FALSE	High	[R].VDDNEETIKKR.[L]	R	2xAcetyl:2H(3) [K9; K10]	P00568 2xAcetyl:2H(3) [K147; K148]	FALSE	0.0211779	0	1	1	3	P00568	P00568 [139-149]	0	1436.75	0	0.663	0.867	0.668	0.935955	0.987162	0.92767	0	0	0	125.1	82.9	108.4	83.6		Peak Found	High	Peak Found	High	High	0	0.0006839	3.76	22.47
FALSE	High	[R].EATNPPVIQEEKPKKKKKAQEDL.[-]	R	6xAcetyl:2H(3) [K12; K14; K15; K16; K17; K18]	P30101 6xAcetyl:2H(3) [K494; K496; K497; K498; K499; K500]	FALSE	0.0269823	0	1	1	5	P30101	P30101 [483-505]	0	2918.64	0	0.01	0.01	0.963	4.34403e-17	3.7678e-17	0.963108			0	203.8			196.2		Peak Found	Not Found	Not Found	High	High	0.0001346	0.002432	2.72	48.16
FALSE	High	[R].VDFNVPMKNNQITNNQR.[I]	R	1xAcetyl:2H(3) [K8]	P00558 1xAcetyl:2H(3) [K30]	FALSE	0.00013416	0	1	1	7	P00558	P00558 [23-39]	0	2077.03	0	0.67	0.662	0.974	0.943247	0.943729	0.919342	0	0	0	121	81	80.1	117.9		High	High	High	High	High	0	1.227e-07	5.45	40.62
FALSE	High	[R].EATADDLIKVVEELTR.[I]	R	1xAcetyl:2H(3) [K9]	Q16531 1xAcetyl:2H(3) [K1131]	FALSE	0.0107222	0	1	1	5	Q16531	Q16531 [1123-1138]	0	1846.98	0	0.01	0.01	0.01	4.34403e-17	3.7678e-17	4.94188e-17				400					High	Not Found	Not Found	Not Found	High	0	0.0002133	4.69	81.01
FALSE	High	[R].EATADDLIKVVEELTR.[I]	R	1xGlu->pyro-Glu [N-Term]; 1xAcetyl:2H(3) [K9]	Q16531 1xGlu->pyro-Glu [N-Term]; 1xAcetyl:2H(3) [K1131]	FALSE	0.02223	0	1	1	1	Q16531	Q16531 [1123-1138]	0	1828.97	0	0.01	0.01	0.01	4.34403e-17	3.7678e-17	4.94188e-17				400					High	Not Found	Not Found	Not Found	High	0	0.000742	3.51	91.08
FALSE	High	[E].VDLLTKELEDFEMKKAAAR.[A]	E	3xAcetyl:2H(3) [K6; K14; K15]; 1xAcetyl:2H(3) [N-Term]	Q9UG63 3xAcetyl:2H(3) [K58; K66; K67]; 1xAcetyl:2H(3) [N-Term]	FALSE	0.000213523	0	1	1	3	Q9UG63	Q9UG63 [53-71]	0	2387.29	0	100	100	100	4.34403e-17	3.7678e-17	4.94188e-17					69.9	151.3	178.9		Not Found	High	High	High	High	0	9.684e-07	5.4	91.35
FALSE	High	[R].VDLPLAVLSKMDINR.[R]	R	1xAcetyl:2H(3) [K10]	Q9H773 1xAcetyl:2H(3) [K121]	FALSE	0.000159213	0	1	1	16	Q9H773	Q9H773 [112-126]	0	1728.98	0	0.397	0.757	0.804	0.802121	0.987032	0.999783	0	0	0	135.2	53.7	102.4	108.7		High	High	High	High	High	0	7.997e-05	4.48	68.78
FALSE	High	[M].EAPHIIVGTPGR.[V]	M	1xGlu->pyro-Glu [N-Term]	P60842 1xGlu->pyro-Glu [N-Term]	FALSE	0.00572132	0	1	1	3	P60842	P60842 [150-161]	0	1228.68	0	1.174	1.364	1.094	0.76089	0.617471	0.834597	0	0	0	86.3	101.4	117.8	94.5		High	High	High	Peak Found	High	0	7.295e-05	4.01	31.89
FALSE	High	[H].EANNPQLKEGLQNMEAR.[L]	H	1xGlu->pyro-Glu [N-Term]; 1xAcetyl:2H(3) [K8]	P31948 1xGlu->pyro-Glu [N-Term]; 1xAcetyl:2H(3) [K109]	FALSE	0.00488148	0	1	1	3	P31948	P31948 [102-118]	0	1968.96	0	0.01	0.05	0.198	4.34403e-17	0.132822	0.2017		0	0	320.5		16	63.5		Peak Found	Not Found	High	Peak Found	High	0	5.576e-05	3.65	46.19
FALSE	High	[T].EAMKQILGVIDKKLR.[N]	T	1xGlu->pyro-Glu [N-Term]; 3xAcetyl:2H(3) [K4; K12; K13]	Q14444 1xGlu->pyro-Glu [N-Term]; 3xAcetyl:2H(3) [K55; K63; K64]	FALSE	0.000276042	0	1	1	15	Q14444	Q14444 [52-66]	0	1859.11	0	100	100	100	4.34403e-17	3.7678e-17	4.94188e-17					133.2	148.2	118.6		Not Found	High	High	High	High	0	2.342e-06	5.27	86.42
FALSE	High	[G].EAIVDAALSALR.[Q]	G	1xGlu->pyro-Glu [N-Term]	Q15084 1xGlu->pyro-Glu [N-Term]	FALSE	0.0110537	0	1	1	13	Q15084	Q15084 [121-132]	0	1210.68	0	0.518	0.444	0.447	0.888572	0.831715	0.713415	0	0	0	166	86	73.7	74.3		High	High	High	High	High	6.911e-05	0.001488	3.61	70.93
FALSE	High	[R].VDNIIKAAPR.[K]	R	1xAcetyl:2H(3) [K6]	P78371 1xAcetyl:2H(3) [K522]	FALSE	0.0236184	0	1	1	15	P78371	P78371 [517-526]	0	1141.68	0	0.64	0.596	0.954	0.879059	0.784677	0.9214	0	0	0	125.4	80.3	74.8	119.6		High	High	High	High	High	0	0.0008249	3.51	30.34
FALSE	High	[R].VDQIIMAKPAGGPKPPSGKKDWDDDQND.[-]	R	4xAcetyl:2H(3) [K8; K14; K19; K20]	P50990 4xAcetyl:2H(3) [K528; K534; K539; K540]	FALSE	0.00805176	0	1	1	9	P50990	P50990 [521-548]	0	3202.58	0	14.589	18.594	17.51	0.00100644	0.0313415	0.000814574	0	0	0	7.7	112.9	143.9	135.5		Peak Found	High	High	High	High	0	0.0001742	4.18	50.05
FALSE	High	[K].EALGKAKDANNGNLQLR.[N]	K	1xGlu->pyro-Glu [N-Term]; 2xAcetyl:2H(3) [K5; K7]	P05455 1xGlu->pyro-Glu [N-Term]; 2xAcetyl:2H(3) [K285; K287]	FALSE	0.00328183	0	1	1	4	P05455	P05455 [281-297]	0	1884.02	0	1.98	0.498	1.407	0.46567	0.961085	0.768141	0	0	0	81.9	162.1	40.8	115.2		Peak Found	Peak Found	High	High	High	0	0.001184	3.71	42.31
FALSE	High	[H].EALAAAELLKKEKINIR.[V]	H	1xGlu->pyro-Glu [N-Term]; 3xAcetyl:2H(3) [K10; K11; K13]	P29401 1xGlu->pyro-Glu [N-Term]; 3xAcetyl:2H(3) [K523; K524; K526]	FALSE	0.00111946	0	1	1	1	P29401	P29401 [514-530]	0	2027.22	0	100	100	100	4.34403e-17	3.7678e-17	4.94188e-17					168.3	128.6	103.1		Not Found	High	Peak Found	Peak Found	High	0	4.542e-06	3.76	71.5
FALSE	High	[R].VDQLTAQLADLAAR.[G]	R			FALSE	0.00224696	0	1	1	1	P18206	P18206 [548-561]	0	1484.81	0	1.235	0.179	1.866	0.803089	0.561228	0.471347	0	0	0	93.5	115.4	16.7	174.4		Peak Found	Peak Found	Peak Found	High	High	0	1.484e-05	4.13	51.79
FALSE	High	[R].VDSTAKVAEIEHAEKEKMKEKVER.[I]	R	5xAcetyl:2H(3) [K6; K15; K17; K19; K21]	P78371 5xAcetyl:2H(3) [K263; K272; K274; K276; K278]	FALSE	0.00181429	0	1	1	10	P78371	P78371 [258-281]	0	3009.6	0	0.178	0.01	1.799	0.0372933	3.7678e-17	0.212275	0		0	134.4	23.9		241.7		High	High	Not Found	High	High	0	1.029e-05	5.23	60.76
FALSE	High	[K].EAGGGGVGGPGAKSAAQAAAQTNSNAAGKQLR.[K]	K	1xGlu->pyro-Glu [N-Term]; 2xAcetyl:2H(3) [K13; K29]	Q8NC51 1xGlu->pyro-Glu [N-Term]; 2xAcetyl:2H(3) [K52; K68]	FALSE	0.011465	0	1	1	1	Q8NC51	Q8NC51 [40-71]	0	2924.48	0	0.01	0.082	0.126	4.34403e-17	0.260807	0.109595		0	0	331.3		27.1	41.6		Peak Found	Not Found	High	Peak Found	High	0	0.0002383	4.09	38.3
FALSE	High	[E].EAGDGTTTATVLAR.[S]	E	1xGlu->pyro-Glu [N-Term]	P10809 1xGlu->pyro-Glu [N-Term]	FALSE	0.0290124	0	1	1	15	P10809	P10809 [108-121]	0	1344.68	0	0.862	0.346	0.562	0.960927	0.615001	0.862459	0	0	0	144.4	124.5	50	81.2		Peak Found	High	High	High	High	6.911e-05	0.002199	1.92	31.4
FALSE	High	[Q].EAFEISKKEMQPTHPIR.[L]	Q	1xGlu->pyro-Glu [N-Term]; 2xAcetyl:2H(3) [K7; K8]	P63104 1xGlu->pyro-Glu [N-Term]; 2xAcetyl:2H(3) [K157; K158]; P31946 1xGlu->pyro-Glu [N-Term]; 2xAcetyl:2H(3) [K159; K160]	FALSE	0.00216607	0	2	2	1	P63104; P31946	P63104 [151-167]; P31946 [153-169]	0	2113.1	0	0.01	0.01	0.01	4.34403e-17	3.7678e-17	4.94188e-17				400				Shared	High	Not Found	Not Found	Not Found	High	0	1.397e-05	4.92	46.55
FALSE	High	[G].EAVSSAVVGEPGITVTHLAVNR.[V]	G	1xGlu->pyro-Glu [N-Term]	P29401 1xGlu->pyro-Glu [N-Term]	FALSE	0.000130121	0	1	1	2	P29401	P29401 [570-591]	0	2188.17	0	0.046	0.012	0.135	0.00612847	0.00654439	0.109195	0	0	0	335.3	15.6	3.9	45.3		High	Peak Found	Peak Found	Peak Found	High	0	3.621e-07	5.68	49.3
FALSE	High	[E].VDALKGTNESLER.[Q]	E	1xAcetyl:2H(3) [K5]; 1xAcetyl:2H(3) [N-Term]	P08670 1xAcetyl:2H(3) [K334]; 1xAcetyl:2H(3) [N-Term]	FALSE	0.00346733	0	1	1	15	P08670	P08670 [330-342]	0	1521.8	0	24.39	28.826	24.99	6.42134e-10	9.43725e-11	8.33383e-13	0	0	0	5.1	123.2	145.6	126.2		Peak Found	High	High	High	High	6.911e-05	0.001629	3.62	45.86
FALSE	High	[SC].EAYLVGLFEDTNLCAIHAKR.[V]	S	1xCarbamidomethyl [C14]; 1xGlu->pyro-Glu [N-Term]; 1xAcetyl:2H(3) [K19]	P84243 1xCarbamidomethyl [C111]; 1xGlu->pyro-Glu [N-Term]; 1xAcetyl:2H(3) [K116]; P68431 1xCarbamidomethyl [C111]; 1xGlu->pyro-Glu [N-Term]; 1xAcetyl:2H(3) [K116]; Q71DI3 1xCarbamidomethyl [C111]; 1xGlu->pyro-Glu [N-Term]; 1xAcetyl:2H(3) [K116]	FALSE	0.0092637	0	1	3	1	P68431	P84243 [98-117]; P68431 [98-117]; Q71DI3 [98-117]	0	2347.19	0	0.01	0.466	0.698	4.34403e-17	0.85567	0.963108		0	0	184.8		86.1	129.1		High	Not Found	Peak Found	Peak Found	High	0	0.0001668	2.17	71.85
FALSE	High	[Q].EDAPSVDIANIR.[M]	Q	1xGlu->pyro-Glu [N-Term]	P29401 1xGlu->pyro-Glu [N-Term]	FALSE	0.0268196	0	1	1	5	P29401	P29401 [291-302]	0	1281.64	0	0.893	0.315	0.617	0.964291	0.146919	0.856092	0	0	0	141.6	126.4	44.7	87.4		High	Peak Found	High	Peak Found	High	0.002889	0.03752	2.98	44.6
FALSE	High	[FL].EDTNLCAIHAKR.[V]	F	1xCarbamidomethyl [C6]; 1xGlu->pyro-Glu [N-Term]; 1xAcetyl:2H(3) [K11]	P84243 1xCarbamidomethyl [C111]; 1xGlu->pyro-Glu [N-Term]; 1xAcetyl:2H(3) [K116]; Q6NXT2 1xCarbamidomethyl [C110]; 1xGlu->pyro-Glu [N-Term]; 1xAcetyl:2H(3) [K115]; P68431 1xCarbamidomethyl [C111]; 1xGlu->pyro-Glu [N-Term]; 1xAcetyl:2H(3) [K116]; Q71DI3 1xCarbamidomethyl [C111]; 1xGlu->pyro-Glu [N-Term]; 1xAcetyl:2H(3) [K116]	FALSE	0.0250927	0	1	4	5	P68431	P84243 [106-117]; Q6NXT2 [105-116]; P68431 [106-117]; Q71DI3 [106-117]	0	1454.72	0	0.976	0.859	0.954	0.922859	0.992591	0.921136	0	0	0	105.6	103	90.7	100.8		High	High	High	High	High	0.0001346	0.002508	3.85	29.76
FALSE	High	[K].EDQTEYLEER.[RW]	K	1xGlu->pyro-Glu [N-Term]	P07900 1xGlu->pyro-Glu [N-Term]; P08238 1xGlu->pyro-Glu [N-Term]; Q58FF6 1xGlu->pyro-Glu [N-Term]; Q58FF7 1xGlu->pyro-Glu [N-Term]	FALSE	0.0166138	0	2	4	13	P07900; P08238	P07900 [192-201]; P08238 [187-196]; Q58FF6 [162-171]; Q58FF7 [166-175]	0	1293.56	0	0.425	0.103	0.359	0.652399	0.0470992	0.420167	0	0	0	212	90.1	21.8	76.1	Shared	High	High	High	High	High	0.0001346	0.002512	2.04	32.06
FALSE	High	[N].EDQKIGIEIIKR.[T]	N	1xGlu->pyro-Glu [N-Term]; 2xAcetyl:2H(3) [K4; K11]	P10809 1xGlu->pyro-Glu [N-Term]; 2xAcetyl:2H(3) [K462; K469]	FALSE	0.0138449	0	1	1	9	P10809	P10809 [459-470]	0	1513.89	0	0.635	0.034	2.361	0.960927	0.0563628	0.141018	0	0	0	99.3	63	3.4	234.3		High	High	Peak Found	High	High	0.0005251	0.009469	2.76	54.71
FALSE	High	[R].VAPEEHPVLLTEAPLNPKANR.[E]	R	1xAcetyl:2H(3) [K18]; 1xAcetyl:2H(3) [N-Term]	P60709 1xAcetyl:2H(3) [K113]; 1xAcetyl:2H(3) [N-Term]; P63261 1xAcetyl:2H(3) [K113]; 1xAcetyl:2H(3) [N-Term]	FALSE	0.000183255	0	2	2	9	P60709; P63261	P60709 [96-116]; P63261 [96-116]	0	2385.3	0	0.829	0.966	0.616	0.994056	0.944796	0.854985	0	0	0	117.2	97.2	113.3	72.2	Shared	High	High	High	High	High	0	2.083e-07	5.05	50.74
FALSE	High	[N].EDNPHGNDSAKASR.[A]	N	1xGlu->pyro-Glu [N-Term]; 1xAcetyl:2H(3) [K11]	P12956 1xGlu->pyro-Glu [N-Term]; 1xAcetyl:2H(3) [K182]	FALSE	0.00160555	0	1	1	3	P12956	P12956 [172-185]	0	1524.69	0	6.62	5.259	3.003	0.0562213	0.229889	0.285854	0	0	0	25.2	166.7	132.5	75.6		Peak Found	Peak Found	High	High	High	0	8.396e-06	4.42	15.31
FALSE	High	[A].EDMEEEQAFKR.[S]	A	1xGlu->pyro-Glu [N-Term]; 1xAcetyl:2H(3) [K10]	P61978 1xGlu->pyro-Glu [N-Term]; 1xAcetyl:2H(3) [K34]	FALSE	0.0234758	0	1	1	14	P61978	P61978 [25-35]	0	1438.63	0	0.483	0.391	0.499	0.87306	0.843013	0.846294	0	0	0	168.5	81.4	65.9	84.2		High	High	Peak Found	High	High	0.007408	0.07834	2.61	36.1
FALSE	High	[F].EDMAKSDKAR.[Y]	F	1xGlu->pyro-Glu [N-Term]; 2xAcetyl:2H(3) [K5; K8]	P26583 1xGlu->pyro-Glu [N-Term]; 2xAcetyl:2H(3) [K65; K68]	FALSE	0.0279792	0	1	1	8	P26583	P26583 [61-70]	0	1222.6	0	0.442	0.167	0.824	0.880475	0.583466	0.994574	0	0	0	164.4	72.6	27.4	135.5		High	Peak Found	Peak Found	High	High	0.0006551	0.01203	2.63	23.47
FALSE	High	[E].VAQKKKISQKKLKKQKLMAR.[E]	E	8xAcetyl:2H(3) [K4; K5; K6; K10; K11; K13; K14; K16]; 1xAcetyl:2H(3) [N-Term]	P18621 8xAcetyl:2H(3) [K167; K168; K169; K173; K174; K176; K177; K179]; 1xAcetyl:2H(3) [N-Term]	FALSE	3.90127e-05	0	1	1	7	P18621	P18621 [164-183]	0	2787.79	0	11.593	12.863	21.177	0.00300476	0.0917785	4.72887e-06	0	0	0	8.6	99.4	110.3	181.6		Peak Found	High	High	High	High	0	3.133e-07	4.24	59.52
FALSE	High	[R].EDLVYQAKLAEQAER.[Y]	R	1xGlu->pyro-Glu [N-Term]; 1xAcetyl:2H(3) [K8]	P62258 1xGlu->pyro-Glu [N-Term]; 1xAcetyl:2H(3) [K12]	FALSE	0.00861031	0	1	1	4	P62258	P62258 [5-19]	0	1789.92	0	1.237	1.458	0.755	0.796443	0.822724	0.987852	0	0	0	89.9	111.2	131	67.9		Peak Found	High	High	Peak Found	High	0	0.0001464	3.42	52.77
FALSE	High	[R].EDLVVAPAGITLKEANEILQR.[S]	R	1xAcetyl:2H(3) [K13]	P12268 1xAcetyl:2H(3) [K195]	FALSE	1.56867e-05	0	1	1	4	P12268	P12268 [183-203]	0	2324.29	0	0.563	0.509	1.412	0.87306	0.809411	0.483727	0	0	0	114.8	64.6	58.4	162.1		Peak Found	High	Peak Found	High	High	0	3.182e-09	6.16	66.43
FALSE	High	[R].EDLVVAPAGITLKEANEILQR.[S]	R	1xGlu->pyro-Glu [N-Term]; 1xAcetyl:2H(3) [K13]	P12268 1xGlu->pyro-Glu [N-Term]; 1xAcetyl:2H(3) [K195]	FALSE	0.000393542	0	1	1	6	P12268	P12268 [183-203]	0	2306.28	0	0.838	1	1.609	0.960927	0.951456	0.598283	0	0	0	89.9	75.4	89.9	144.7		Peak Found	High	Peak Found	High	High	0	8.779e-07	3.83	74.57
FALSE	High	[Q].EAFDISKKEMQPTHPIR.[L]	Q	1xGlu->pyro-Glu [N-Term]; 2xAcetyl:2H(3) [K7; K8]	P27348 1xGlu->pyro-Glu [N-Term]; 2xAcetyl:2H(3) [K157; K158]	FALSE	0.00448145	0	1	1	1	P27348	P27348 [151-167]	0	2099.09	0	0.01	0.01	0.01	4.34403e-17	3.7678e-17	4.94188e-17				400					High	Not Found	Not Found	Not Found	High	0	4.817e-05	4.82	46.23
FALSE	High	[S].EDKGALAKLVEAIR.[T]	S	1xGlu->pyro-Glu [N-Term]; 2xAcetyl:2H(3) [K3; K8]	P62424 1xGlu->pyro-Glu [N-Term]; 2xAcetyl:2H(3) [K212; K217]	FALSE	0.0187586	0	1	1	1	P62424	P62424 [210-223]	0	1584.92	0	100	100	100	4.34403e-17	3.7678e-17	4.94188e-17					143.7	177.8	78.5		Not Found	Peak Found	High	Peak Found	High	0	0.0005524	2.56	74.69
FALSE	High	[T].EDKEALKKQLPGVKSEGKR.[K]	T	1xGlu->pyro-Glu [N-Term]; 5xAcetyl:2H(3) [K3; K7; K8; K14; K18]	P09874 1xGlu->pyro-Glu [N-Term]; 5xAcetyl:2H(3) [K192; K196; K197; K203; K207]	FALSE	0.00159576	0	1	1	1	P09874	P09874 [190-208]	0	2347.34	0	0.496	0.01	0.619	0.895407	3.7678e-17	0.940831	0		0	189.1	93.8		117.1		High	Peak Found	Not Found	Peak Found	High	0	8.311e-06	4.56	50.17
FALSE	High	[S].EDKDKEGKPLLKAVMR.[R]	S	1xGlu->pyro-Glu [N-Term]; 4xAcetyl:2H(3) [K3; K5; K8; K12]	P13639 1xGlu->pyro-Glu [N-Term]; 4xAcetyl:2H(3) [K328; K330; K333; K337]	FALSE	5.49434e-05	0	1	1	14	P13639	P13639 [326-341]	0	2019.13	0	1.357	0.387	1.067	0.615307	0.449732	0.840389	0	0	0	105	142.4	40.6	112		Peak Found	High	High	High	High	0	6.486e-07	4.68	61.96
FALSE	High	[R].EDGNEEDKENQGDETQGQQPPQRR.[Y]	R	1xAcetyl:2H(3) [K8]	P67809 1xAcetyl:2H(3) [K264]	FALSE	0.000720874	0	1	1	31	P67809	P67809 [257-280]	1	2829.23	0	1.037	1.473	0.541	0.87306	0.533025	0.835967	0	0	0	98.7	102.4	145.5	53.4		High	High	High	High	High	0	5.389e-05	4.37	16.79
FALSE	High	[R].EDGNEEDKENQGDETQGQQPPQRR.[Y]	R	1xGlu->pyro-Glu [N-Term]; 1xAcetyl:2H(3) [K8]	P67809 1xGlu->pyro-Glu [N-Term]; 1xAcetyl:2H(3) [K264]	FALSE	0.011964	0	1	1	2	P67809	P67809 [257-280]	1	2811.22	0	0.916	1.046	0.213	0.922859	0.938657	0.223822	0	0	0	126	115.4	131.8	26.8		Peak Found	Peak Found	Peak Found	High	High	0	0.0002572	3.69	17.9
FALSE	High	[R].EDGNEEDKENQGDETQGQQPPQR.[R]	R	1xAcetyl:2H(3) [K8]	P67809 1xAcetyl:2H(3) [K264]	FALSE	1.2899e-05	0	1	1	75	P67809	P67809 [257-279]	0	2673.13	0	0.667	0.908	0.663	0.964291	0.9635	0.948883	0	0	0	123.5	82.4	112.2	81.9		High	High	High	High	High	0	9.475e-07	5.01	17.99
FALSE	High	[R].EDGNEEDKENQGDETQGQQPPQR.[R]	R	1xGlu->pyro-Glu [N-Term]; 1xAcetyl:2H(3) [K8]	P67809 1xGlu->pyro-Glu [N-Term]; 1xAcetyl:2H(3) [K264]	FALSE	0.0148024	0	1	1	2	P67809	P67809 [257-279]	0	2655.12	0	1.123	1.143	1.397	0.83667	0.874514	0.806598	0	0	0	85.8	96.3	98	119.9		High	Peak Found	High	Peak Found	High	0.009901	0.1022	1.84	20.52
FALSE	High	[E].VATLTAAGKEVMLVGIGDKIR.[G]	E	2xAcetyl:2H(3) [K9; K19]; 1xAcetyl:2H(3) [N-Term]	P36542 2xAcetyl:2H(3) [K126; K136]; 1xAcetyl:2H(3) [N-Term]	FALSE	0.000232606	0	1	1	4	P36542	P36542 [118-138]	0	2277.32	0	100	100	100	4.34403e-17	3.7678e-17	4.94188e-17					159	145.3	95.8		Not Found	High	High	Peak Found	High	0	3.414e-05	4.13	88.04
FALSE	High	[T].EDDKHNNAKYAVSMAR.[R]	T	1xGlu->pyro-Glu [N-Term]; 2xAcetyl:2H(3) [K4; K9]	P13797 1xGlu->pyro-Glu [N-Term]; 2xAcetyl:2H(3) [K582; K587]	FALSE	0.00619383	0	1	1	2	P13797	P13797 [579-594]	0	1920.91	0	0.491	0.114	0.451	0.895564	0.345378	0.814534	0	0	0	194.6	95.6	22.1	87.7		Peak Found	High	Peak Found	Peak Found	High	0	0.000493	5.43	33.3
FALSE	High	[R].VAVEEVDEEGKFVR.[L]	R	1xAcetyl:2H(3) [K11]	P02545 1xAcetyl:2H(3) [K450]	FALSE	0.00429388	0	1	1	2	P02545	P02545 [440-453]	0	1650.84	0	100	100	100	4.34403e-17	3.7678e-17	4.94188e-17					132.4	31.7	235.8		Not Found	Peak Found	Peak Found	High	High	0	4.488e-05	3.5	39
FALSE	High	[H].EDAVAAMSKDKNNMQHR.[Y]	H	1xGlu->pyro-Glu [N-Term]; 2xAcetyl:2H(3) [K9; K11]	P31942 1xGlu->pyro-Glu [N-Term]; 2xAcetyl:2H(3) [K253; K255]	FALSE	0.00342523	0	1	1	2	P31942	P31942 [245-261]	0	2016.95	0	0.947	0.655	0.789	0.903679	0.99706	0.99558	0	0	0	118	111.7	77.2	93.1		High	Peak Found	Peak Found	High	High	0	3.058e-05	4.44	36.18
FALSE	High	[H].EDAVAAMSKDKANMQHR.[Y]	H	1xGlu->pyro-Glu [N-Term]; 2xAcetyl:2H(3) [K9; K11]	P31943 1xGlu->pyro-Glu [N-Term]; 2xAcetyl:2H(3) [K347; K349]	FALSE	0.0004261	0	1	1	8	P31943	P31943 [339-355]	0	1973.94	0	0.273	0.22	0.37	0.445578	0.443516	0.510871	0	0	0	214.8	58.6	47.2	79.5		High	Peak Found	Peak Found	High	High	0	8.794e-07	5.52	40.4
FALSE	High	[E].VAQKKKISQKKLKKQKLMAR.[E]	E	1xOxidation [M18]; 8xAcetyl:2H(3) [K4; K5; K6; K10; K11; K13; K14; K16]; 1xAcetyl:2H(3) [N-Term]	P18621 1xOxidation [M181]; 8xAcetyl:2H(3) [K167; K168; K169; K173; K174; K176; K177; K179]; 1xAcetyl:2H(3) [N-Term]	FALSE	0.000181027	0	1	1	1	P18621	P18621 [164-183]	0	2803.78	0	100	100	100	4.34403e-17	3.7678e-17	4.94188e-17					237.2	72.8	90		Not Found	High	Peak Found	Peak Found	High	0	2.047e-07	4.68	54.38
FALSE	High	[Y].VLLSEKKISSIQSIVPALEIANAHR.[K]	Y	2xAcetyl:2H(3) [K6; K7]; 1xAcetyl:2H(3) [N-Term]	P10809 2xAcetyl:2H(3) [K249; K250]; 1xAcetyl:2H(3) [N-Term]	FALSE	0.000614932	0	1	1	4	P10809	P10809 [244-268]	0	2851.66	0	0.761	1.166	0.798	0.985294	0.918152	0.99558	0	0	0	107.4	81.7	125.2	85.7		High	Peak Found	High	High	High	0	1.643e-06	4.44	84.3
FALSE	High	[T].EAEQQQLIDDHFLFDKPVSPLLLASGMAR.[D]	T	1xGlu->pyro-Glu [N-Term]; 1xAcetyl:2H(3) [K16]	P12277 1xGlu->pyro-Glu [N-Term]; 1xAcetyl:2H(3) [K196]	FALSE	0.000484477	0	1	1	31	P12277	P12277 [181-209]	0	3295.69	0	0.502	0.666	1.135	0.87306	0.963439	0.848555	0	0	0	121.1	60.8	80.6	137.5		High	High	High	High	High	0	3.568e-05	5.17	76.61
FALSE	High	[Q].EAEKYKAEDEKQR.[D]	Q	1xGlu->pyro-Glu [N-Term]; 3xAcetyl:2H(3) [K4; K6; K11]	P11142 1xGlu->pyro-Glu [N-Term]; 3xAcetyl:2H(3) [K524; K526; K531]	FALSE	0.0186451	0	1	1	9	P11142	P11142 [521-533]	0	1740.87	0	0.213	0.082	0.179	0.0478348	0.000388572	0.0103296	0	0	0	271.4	57.7	22.2	48.6		High	High	High	Peak Found	High	0	0.0005481	3.92	31.41
FALSE	High	[RK].DHCVAHKLFNNLK.[-]	R	1xCarbamidomethyl [C3]; 2xAcetyl:2H(3) [K7; K13]	P07919 1xCarbamidomethyl [C81]; 2xAcetyl:2H(3) [K85; K91]; A0A096LP55 1xCarbamidomethyl [C81]; 2xAcetyl:2H(3) [K85; K91]	FALSE	0.00485176	0	1	2	1	A0A096LP55	P07919 [79-91]; A0A096LP55 [79-91]	0	1685.87	0	0.432	0.368	0.106	0.838942	0.878498	0.0421158	0	0	0	209.9	90.6	77.2	22.2		High	Peak Found	Peak Found	Peak Found	High	0	5.519e-05	3.36	44.41
FALSE	High	[R].VEVERDNLAEDIMR.[L]	R			FALSE	0.00244765	0	1	1	4	P08670	P08670 [171-184]	1	1688.83	0	0.666	1.446	0.659	0.928917	0.545094	0.919342	0	0	0	106.1	70.7	153.4	69.9		High	High	High	High	High	0	3.541e-05	3.66	38.91
FALSE	High	[R].DGETLEELMKLSPEELLLR.[W]	R	1xOxidation [M9]; 1xAcetyl:2H(3) [K10]	P13797 1xOxidation [M265]; 1xAcetyl:2H(3) [K266]	FALSE	0.000190103	0	1	1	8	P13797	P13797 [257-275]	0	2276.18	0	2.139	0.01	6.43	0.468425	3.7678e-17	0.0215822	0		0	41.8	89.4		268.8		Peak Found	High	Not Found	Peak Found	High	0	2.219e-07	4.79	72.02
FALSE	High	[R].DGETLEELMKLSPEELLLR.[W]	R	1xAcetyl:2H(3) [K10]	P13797 1xAcetyl:2H(3) [K266]	FALSE	0.00121205	0	1	1	23	P13797	P13797 [257-275]	0	2260.18	0	0.343	0.391	0.767	0.429441	0.508339	0.991092	0	0	0	159.9	54.9	62.6	122.7		High	High	Peak Found	High	High	0	3.419e-05	4.87	81.08
FALSE	High	[RK].VEVTEFEDIKSGYR.[I]	R	1xAcetyl:2H(3) [K10]	Q01105 1xAcetyl:2H(3) [K132]; P0DME0 1xAcetyl:2H(3) [K142]	FALSE	0.00244765	0	1	2	9	Q01105	Q01105 [123-136]; P0DME0 [133-146]	0	1716.85	0	2.4	1.837	5.276	0.27402	0.697997	0.00169221	0	0	0	38.1	91.3	69.9	200.8		High	High	High	High	High	0	1.922e-05	5.15	48.46
FALSE	High	[R].DFVAEPMGEKPVGSLAGIGEVLGKKLEER.[G]	R	1xOxidation [M7]; 3xAcetyl:2H(3) [K10; K24; K25]	O75531 1xOxidation [M15]; 3xAcetyl:2H(3) [K18; K32; K33]	FALSE	0.00375393	0	1	1	2	O75531	O75531 [9-37]	0	3206.7	0	0.01	0.01	0.01	4.34403e-17	3.7678e-17	4.94188e-17				400					High	Not Found	Not Found	Not Found	High	0.0005741	0.009676	1.75	76.48
FALSE	High	[R].DFVAEPMGEKPVGSLAGIGEVLGKKLEER.[G]	R	3xAcetyl:2H(3) [K10; K24; K25]	O75531 3xAcetyl:2H(3) [K18; K32; K33]	FALSE	0.000398384	0	1	1	15	O75531	O75531 [9-37]	0	3190.7	0	0.122	0.52	0.711	0.0389415	0.815688	0.963814	0	0	0	170	20.7	88.3	120.9		High	High	High	High	High	0	7.848e-07	5.23	80.1
FALSE	High	[E].VFADLFDPVIQER.[H]	E	1xAcetyl:2H(3) [N-Term]	P12532 1xAcetyl:2H(3) [N-Term]	FALSE	0.00273221	0	1	1	26	P12532	P12532 [117-129]	0	1593.84	0	17.584	24.358	23.572	2.87608e-08	7.64951e-10	2.07416e-12	0	0	0	6	105.7	146.5	141.8		Peak Found	High	High	High	High	0	0.0001079	3.3	82.51
FALSE	High	[R].DEFEGLFKQPAENVNQYLTDPKFVER.[T]	R	2xAcetyl:2H(3) [K8; K22]	P22314 2xAcetyl:2H(3) [K657; K671]	FALSE	0.00704065	0	1	1	2	P22314	P22314 [650-675]	0	3203.58	0	0.01	0.01	0.839	4.34403e-17	3.7678e-17	0.991092			0	217.5			182.5		High	Not Found	Not Found	High	High	0	0.0001426	2.34	69.54
FALSE	High	[R].DEDDADYKPKKIKTEDTKKEKKR.[K]	R	8xAcetyl:2H(3) [K8; K10; K11; K13; K18; K19; K21; K22]; 1xAcetyl:2H(3) [N-Term]	P11387 8xAcetyl:2H(3) [K148; K150; K151; K153; K158; K159; K161; K162]; 1xAcetyl:2H(3) [N-Term]	FALSE	0.0092637	0	1	1	7	P11387	P11387 [141-163]	0	3213.74	0	100		100	4.34403e-17		4.94188e-17					173.8		226.2		Not Found	High	Not Found	High	High	0	0.0003798	3.83	47.42
FALSE	High	[E].VFKDLFDPIIEDR.[H]	E	1xAcetyl:2H(3) [K3]; 1xAcetyl:2H(3) [N-Term]	P12277 1xAcetyl:2H(3) [K86]; 1xAcetyl:2H(3) [N-Term]	FALSE	0.0030128	0	1	1	38	P12277	P12277 [84-96]	0	1696.91	0	21.697	30.626	24.686	2.59255e-09	4.35472e-11	1.0096e-12	0	0	0	5.1	111.3	157	126.6		Peak Found	High	High	High	High	0	0.0002414	4.13	85.52
FALSE	High	[R].DDPSTIEKLAKNKQKPITPETAEKLAR.[D]	R	5xAcetyl:2H(3) [K8; K11; K13; K15; K24]	P60953 5xAcetyl:2H(3) [K128; K131; K133; K135; K144]	FALSE	2.25013e-05	0	1	1	23	P60953	P60953 [121-147]	0	3246.8	0	0.601	0.724	0.575	0.941986	0.981674	0.90318	0	0	0	138	82.9	99.8	79.3		High	Peak Found	High	High	High	0	9.871e-08	6.11	55.77
FALSE	High	[R].DDGLFSGDPNWFPKKSKENPR.[N]	R	3xAcetyl:2H(3) [K14; K15; K17]; 1xAcetyl:2H(3) [N-Term]	P37802 3xAcetyl:2H(3) [K153; K154; K156]; 1xAcetyl:2H(3) [N-Term]	FALSE	0.0148024	0	1	1	2	P37802	P37802 [140-160]	0	2614.3	0	0.01	0.01	0.753	4.34403e-17	3.7678e-17	0.987852			0	228.1			171.9		High	Not Found	Not Found	Peak Found	High	0	0.0003707	3.92	58.58
FALSE	High	[R].DDGLFSGDPNWFPKKSKENPR.[N]	R	3xAcetyl:2H(3) [K14; K15; K17]	P37802 3xAcetyl:2H(3) [K153; K154; K156]	FALSE	0.00121205	0	1	1	10	P37802	P37802 [140-160]	0	2569.27	0	0.681	0.795	0.589	0.977286	0.997914	0.888954	0	0	0	130.5	88.9	103.8	76.8		High	High	Peak Found	High	High	0	2.689e-05	4.84	57.91
FALSE	High	[R].DDFEKKMADFHKEEMDDQDKDKAKGR.[K]	R	6xAcetyl:2H(3) [K5; K6; K12; K20; K22; K24]	Q9Y2W1 6xAcetyl:2H(3) [K420; K421; K427; K435; K437; K439]	FALSE	0.000882009	0	1	1	2	Q9Y2W1	Q9Y2W1 [416-441]	0	3426.61	0			100			4.94188e-17							400		Not Found	Not Found	Not Found	High	High	0	3.037e-06	6.67	51.97
FALSE	High	[M].DDDIAALVVDNGSGMCKAGFAGDDAPR.[A]	M	1xAcetyl [N-Term]; 1xCarbamidomethyl [C16]; 1xAcetyl:2H(3) [K17]	P60709 1xAcetyl [N-Term]; 1xCarbamidomethyl [C17]; 1xAcetyl:2H(3) [K18]	FALSE	2.28581e-06	0	1	1	42	P60709	P60709 [2-28]	0	2824.26	0	0.666	0.825	0.542	0.90599	0.995349	0.716135	0	0	0	131.9	87.8	108.8	71.5		High	High	High	High	High	0	1.548e-06	6.05	63.94
FALSE	High	[R].VGAGAPVYMAAVLEYLTAEILELAGNAAR.[D]	R	1xOxidation [M9]	Q16777 1xOxidation [M52]; Q6FI13 1xOxidation [M52]	FALSE	0.00044746	0	1	2	3	Q6FI13	Q16777 [44-72]; Q6FI13 [44-72]	0	2949.54	0	0.01	0.01	56.49	4.34403e-17	3.7678e-17	1.52809e-07			0	7			393		Peak Found	Not Found	Not Found	High	High	0	6.614e-05	4.83	100.23
FALSE	High	[R].DASLMVTNDGATILKNIGVDNPAAKVLVDMSR.[V]	R	2xAcetyl:2H(3) [K15; K25]	P78371 2xAcetyl:2H(3) [K72; K82]	FALSE	0.0065836	0	1	1	5	P78371	P78371 [58-89]	0	3418.78	0	0.241	0.01	2.747	0.599815	3.7678e-17	0.396215	0		0	100.3	24.2		275.6		High	Peak Found	Not Found	High	High	0	0.0001274	5.31	84.16
FALSE	High	[A].DAPEEEDHVLVLR.[K]	A	1xAcetyl:2H(3) [N-Term]	P07237 1xAcetyl:2H(3) [N-Term]	FALSE	0.00220615	0	1	1	31	P07237	P07237 [18-30]	0	1566.78	0	0.68	0.807	0.808	0.920178	0.984696	0.997315	0	0	0	121.4	82.5	98	98.1		High	High	High	High	High	0	0.0004662	4.27	40.5
FALSE	High	[E].VGDTQVVVFKHEKEDGAISTIVLR.[G]	E	2xAcetyl:2H(3) [K10; K13]; 1xAcetyl:2H(3) [N-Term]	P50990 2xAcetyl:2H(3) [K364; K367]; 1xAcetyl:2H(3) [N-Term]	FALSE	0.00111946	0	1	1	1	P50990	P50990 [355-378]	0	2775.52	0	100	100	100	4.34403e-17	3.7678e-17	4.94188e-17					98	122.3	179.7		Not Found	Peak Found	High	Peak Found	High	0	4.56e-06	4.15	64.41
FALSE	High	[R].DAKLDKAQIHDLVLVGGSTR.[I]	R	2xAcetyl:2H(3) [K3; K6]	P0DMV9 2xAcetyl:2H(3) [K325; K328]	FALSE	6.46368e-06	0	1	1	6	P0DMV9	P0DMV9 [323-342]	0	2226.24	0	0.228	0.01	1.016	0.291272	3.7678e-17	0.909807	0		0	178.3	40.6		181.1		High	Peak Found	Not Found	High	High	0	7.059e-10	6.33	51.45
FALSE	High	[M].VGGEAAAAVEELVSGVR.[Q]	M	1xAcetyl:2H(3) [N-Term]	Q96HQ2 1xAcetyl:2H(3) [N-Term]	FALSE	0.00131229	0	1	1	2	Q96HQ2	Q96HQ2 [2-18]	0	1658.88	0	0.186	0.353	0.529	0.430964	0.890057	0.869865	0	0	0	193.4	36	68.2	102.4		High	Peak Found	Peak Found	Peak Found	High	0	6.286e-05	3.66	80.68
FALSE	High	[R].DAEDAMDAMDGAVLDGR.[E]	R			FALSE	0.000115142	0	1	1	3	Q01130	Q01130 [67-83]	0	1751.72	0	1.075	1.109	0.868	0.85351	0.844747	0.972877	0	0	0	98.7	106.2	109.4	85.7		High	High	Peak Found	High	High	0	9.506e-08	4.07	49.87
FALSE	High	[R].DHENVKEKEKQSDSKGKDQER.[S]	R	5xAcetyl:2H(3) [K6; K8; K10; K15; K17]	Q13427 5xAcetyl:2H(3) [K498; K500; K502; K507; K509]	FALSE	9.12694e-05	0	1	1	3	Q13427	Q13427 [493-513]	0	2739.36	0	0.559	0.261	0.711	0.974516	0.794148	0.985099	0	0	0	158	88.4	41.2	112.4		Peak Found	Peak Found	High	High	High	0	6.402e-08	6.51	25.63
FALSE	High	[R].VEPPLKAVMEQANLQR.[E]	R	1xAcetyl:2H(3) [K6]	O95757 1xAcetyl:2H(3) [K322]	FALSE	0.00699783	0	1	1	3	O95757	O95757 [317-332]	0	1868.01	0	0.514	0.13	1.142	0.930218	0.455144	0.921136	0	0	0	143.6	73.8	18.7	163.9		High	Peak Found	Peak Found	High	High	0	0.0005192	3.34	57.43
FALSE	High	[RK].VEILANDQGNR.[TI]	R			FALSE	0.00506365	0	4	7	34	P17066; P11142; P11021; P0DMV9	P48741 [28-38]; P17066 [28-38]; P54652 [27-37]; P11142 [26-36]; P11021 [50-60]; P0DMV9 [26-36]; P34931 [28-38]	0	1228.63	0	0.889	1.312	0.855	0.964954	0.659526	0.985609	0	0	0	98.6	87.7	129.4	84.3	Shared	High	High	High	High	High	0	5.904e-05	3.78	20.89
FALSE	High	[E].VEKMNKKMEEVKEANIR.[V]	E	4xAcetyl:2H(3) [K3; K6; K7; K12]; 1xAcetyl:2H(3) [N-Term]	P09874 4xAcetyl:2H(3) [K438; K441; K442; K447]; 1xAcetyl:2H(3) [N-Term]	FALSE	0.00121948	0	1	1	10	P09874	P09874 [436-452]	0	2301.24	0	100		100	4.34403e-17		4.94188e-17					198.5		201.5		Not Found	High	Not Found	High	High	0	1.683e-05	5.26	66.63
FALSE	High	[T].EAEALASSLMGLFEKR.[R]	T	1xGlu->pyro-Glu [N-Term]; 1xAcetyl:2H(3) [K15]	P50395 1xGlu->pyro-Glu [N-Term]; 1xAcetyl:2H(3) [K137]	FALSE	0.0111212	0	1	1	1	P50395	P50395 [123-138]	0	1778.92	0	0.012	0.01	0.486	2.7121e-05	3.7678e-17	0.848555	0		0	267.1	3.2		129.7		High	Peak Found	Not Found	Peak Found	High	0	0.0002275	3.36	88.6
FALSE	High	[M].VEADRPGKLFIGGLNTETNEKALEAVFGKYGR.[I]	M	1xAcetyl [N-Term]; 3xAcetyl:2H(3) [K8; K21; K29]	P38159 1xAcetyl [N-Term]; 3xAcetyl:2H(3) [K9; K22; K30]	FALSE	0.000845063	0	1	1	3	P38159	P38159 [2-33]	0	3656.93	0	0.435	0.714	0.514	0.801129	0.980818	0.807887	0	0	0	150.2	65.3	107.3	77.2		High	Peak Found	Peak Found	High	High	0	2.803e-06	5.21	75.73
FALSE	High	[T].EADAEKTFEEKQGTEIDGR.[S]	T	1xGlu->pyro-Glu [N-Term]; 2xAcetyl:2H(3) [K6; K11]	P19338 1xGlu->pyro-Glu [N-Term]; 2xAcetyl:2H(3) [K444; K449]	FALSE	0.000279439	0	1	1	8	P19338	P19338 [439-457]	0	2225.05	0	1.41	0.244	0.894	0.676972	0.747835	0.985609	0	0	0	112.7	158.9	27.5	100.8		Peak Found	Peak Found	High	Peak Found	High	0	4.683e-06	3.81	43.84
FALSE	High	[R].DVPLHALYDNVEKLFPGFEIETVKNNLR.[I]	R	2xAcetyl:2H(3) [K13; K24]; 1xAcetyl:2H(3) [N-Term]	P08243 2xAcetyl:2H(3) [K221; K232]; 1xAcetyl:2H(3) [N-Term]	FALSE	0.00384679	0	1	1	12	P08243	P08243 [209-236]	0	3405.8	0	1.206	0.868	1.144	0.803089	0.969912	0.872352	0	0	0	94.8	114.4	82.3	108.5		High	High	Peak Found	High	High	0	4.978e-05	5.25	91.7
FALSE	High	[R].VEEEAAQKNMALKKIR.[E]	R	3xAcetyl:2H(3) [K8; K13; K14]	P35579 3xAcetyl:2H(3) [K1099; K1104; K1105]	FALSE	0.000325592	0	1	1	2	P35579	P35579 [1092-1107]	0	1993.11	0	0.01	0.01	0.118	4.34403e-17	3.7678e-17	0.050391			0	357.9			42.1		High	Not Found	Not Found	Peak Found	High	0	5.559e-07	4.95	42.28
FALSE	High	[R].DTPAKNAQKSNQNGKDSKPSSTPR.[S]	R	4xAcetyl:2H(3) [K5; K9; K15; K18]	P06748 4xAcetyl:2H(3) [K202; K206; K212; K215]	FALSE	9.468e-05	0	1	1	26	P06748	P06748 [198-221]	0	2736.39	0	0.533	0.943	0.559	0.71745	0.951719	0.749699	0	0	0	131.8	70.2	124.3	73.7		High	High	High	High	High	0	4.886e-06	5.48	20.9
FALSE	High	[R].VEEKEGIPPQQQR.[L]	R	1xAcetyl:2H(3) [K4]	Q15843 1xAcetyl:2H(3) [K33]	FALSE	0.0165132	0	1	1	4	Q15843	Q15843 [30-42]	0	1582.83	0	0.621	0.338	0.749	0.965988	0.835011	0.994778	0	0	0	147.7	91.7	49.9	110.7		Peak Found	High	High	Peak Found	High	0.0002176	0.003747	3.09	21.54
FALSE	High	[E].VEEMKESKLPGDKGLVLMSR.[A]	E	3xAcetyl:2H(3) [K5; K8; K13]; 1xAcetyl:2H(3) [N-Term]	P27824 3xAcetyl:2H(3) [K110; K113; K118]; 1xAcetyl:2H(3) [N-Term]	FALSE	0.00401485	0	1	1	1	P27824	P27824 [106-125]	0	2426.31	0	10.116	12.233	4.916	0.00501868	0.0612428	0.0489377	0	0	0	14.2	143.2	173.1	69.6		Peak Found	High	Peak Found	Peak Found	High	0	4.007e-05	3.45	65.84
FALSE	High	[R].DSLLQDGEFSMDLR.[T]	R	1xOxidation [M11]	P07737 1xOxidation [M86]	FALSE	0.00464872	0	1	1	6	P07737	P07737 [76-89]	0	1641.74	0	0.853	0.844	0.833	0.96169	0.987162	0.994778	0	0	0	113.3	96.7	95.6	94.4		High	High	High	High	High	0	0.0001512	4.4	48.44
FALSE	High	[R].DSLLQDGEFSMDLR.[T]	R			FALSE	0.00110586	0	1	1	5	P07737	P07737 [76-89]	0	1625.75	0	0.368	0.483	0.631	0.291272	0.533631	0.877822	0	0	0	161.2	59.3	77.8	101.7		High	Peak Found	High	Peak Found	High	0	6.271e-06	4.82	56
FALSE	High	[R].DQEGQDVLLFIDNIFR.[F]	R			FALSE	9.468e-05	0	1	1	7	P06576	P06576 [295-310]	0	1921.97	0	1.23	2.139	1.191	0.799447	0.586664	0.85458	0	0	0	71.9	88.5	153.9	85.7		High	High	Peak Found	High	High	0	6.831e-08	5.91	86.98
FALSE	High	[Q].EAEKYKAEDEVQR.[E]	Q	1xGlu->pyro-Glu [N-Term]; 2xAcetyl:2H(3) [K4; K6]	P0DMV9 1xGlu->pyro-Glu [N-Term]; 2xAcetyl:2H(3) [K524; K526]	FALSE	0.0204213	0	1	1	9	P0DMV9	P0DMV9 [521-533]	0	1666.82	0	0.166	0.056	0.123	0.00800833	1.20908e-06	0.000336848	0	0	0	297.2	49.4	16.8	36.5		High	High	Peak Found	Peak Found	High	0.0003713	0.008938	3.17	35.42
FALSE	High	[E].VEEVKEEGPKEMTLDEWKAIQNKDR.[A]	E	4xAcetyl:2H(3) [K5; K10; K18; K23]; 1xAcetyl:2H(3) [N-Term]	Q8NC51 4xAcetyl:2H(3) [K281; K286; K294; K299]; 1xAcetyl:2H(3) [N-Term]	FALSE	0.00249293	0	1	1	3	Q8NC51	Q8NC51 [277-301]	0	3226.64	0	100	100	100	4.34403e-17	3.7678e-17	4.94188e-17					123.1	132.6	144.2		Not Found	High	Peak Found	High	High	0	1.768e-05	5.53	69.79
FALSE	High	[R].DLVEAVAHILGIR.[D]	R	1xAcetyl:2H(3) [N-Term]	P49327 1xAcetyl:2H(3) [N-Term]	FALSE	0.0045089	0	1	1	4	P49327	P49327 [2126-2138]	0	1450.85	0	100	100	100	4.34403e-17	3.7678e-17	4.94188e-17					175.4	84.9	139.7		Not Found	High	Peak Found	High	High	0	0.0001199	4.24	97.43
FALSE	High	[R].DLVEAVAHILGIR.[D]	R			FALSE	0.00771527	0	1	1	5	P49327	P49327 [2126-2138]	0	1405.82	0	100	100	100	4.34403e-17	3.7678e-17	4.94188e-17					17.1	212.8	170.2		Not Found	Peak Found	High	Peak Found	High	0	0.0004684	4.57	83.4
FALSE	High	[R].DLTDYLMKILTER.[G]	R	1xOxidation [M7]; 1xAcetyl:2H(3) [K8]; 1xAcetyl:2H(3) [N-Term]	P63267 1xOxidation [M191]; 1xAcetyl:2H(3) [K192]; 1xAcetyl:2H(3) [N-Term]; P60709 1xOxidation [M190]; 1xAcetyl:2H(3) [K191]; 1xAcetyl:2H(3) [N-Term]; P62736 1xOxidation [M192]; 1xAcetyl:2H(3) [K193]; 1xAcetyl:2H(3) [N-Term]; P68133 1xOxidation [M192]; 1xAcetyl:2H(3) [K193]; 1xAcetyl:2H(3) [N-Term]; Q562R1 1xOxidation [M191]; 1xAcetyl:2H(3) [K192]; 1xAcetyl:2H(3) [N-Term]; P68032 1xOxidation [M192…	FALSE	0.00202525	0	3	7	16	P60709; Q562R1; P63261	P63267 [185-197]; P60709 [184-196]; P62736 [186-198]; P68133 [186-198]; Q562R1 [185-197]; P68032 [186-198]; P63261 [184-196]	0	1716.9	0	100	100	100	4.34403e-17	3.7678e-17	4.94188e-17					76.4	168.9	154.8	Shared	Not Found	High	High	Peak Found	High	0	9.096e-05	3.4	85.01
FALSE	High	[R].DLTDYLMKILTER.[G]	R	1xAcetyl:2H(3) [K8]; 1xAcetyl:2H(3) [N-Term]	P63267 1xAcetyl:2H(3) [K192]; 1xAcetyl:2H(3) [N-Term]; P60709 1xAcetyl:2H(3) [K191]; 1xAcetyl:2H(3) [N-Term]; P62736 1xAcetyl:2H(3) [K193]; 1xAcetyl:2H(3) [N-Term]; P68133 1xAcetyl:2H(3) [K193]; 1xAcetyl:2H(3) [N-Term]; Q562R1 1xAcetyl:2H(3) [K192]; 1xAcetyl:2H(3) [N-Term]; P68032 1xAcetyl:2H(3) [K193]; 1xAcetyl:2H(3) [N-Term]; P63261 1xAcetyl:2H(3) [K191]; 1xAcetyl:2H(3) [N-Term]	FALSE	0.0103375	0	3	7	30	P60709; Q562R1; P63261	P63267 [185-197]; P60709 [184-196]; P62736 [186-198]; P68133 [186-198]; Q562R1 [185-197]; P68032 [186-198]; P63261 [184-196]	0	1700.9	0	0.452	0.71	0.463	0.513311	0.933918	0.498299	0	0	0	152.4	68.8	108.2	70.6	Shared	High	High	High	High	High	0.00261	0.03146	3.48	93.14
FALSE	High	[R].DLTDYLMKILTER.[G]	R	1xOxidation [M7]; 1xAcetyl:2H(3) [K8]	P63267 1xOxidation [M191]; 1xAcetyl:2H(3) [K192]; P60709 1xOxidation [M190]; 1xAcetyl:2H(3) [K191]; P62736 1xOxidation [M192]; 1xAcetyl:2H(3) [K193]; P68133 1xOxidation [M192]; 1xAcetyl:2H(3) [K193]; Q562R1 1xOxidation [M191]; 1xAcetyl:2H(3) [K192]; P68032 1xOxidation [M192]; 1xAcetyl:2H(3) [K193]; P63261 1xOxidation [M190]; 1xAcetyl:2H(3) [K191]	FALSE	0.0205455	0	3	7	1	P60709; Q562R1; P63261	P63267 [185-197]; P60709 [184-196]; P62736 [186-198]; P68133 [186-198]; Q562R1 [185-197]; P68032 [186-198]; P63261 [184-196]	0	1671.87	0	11.916	9.648	3.824	0.00436909	0.0963738	0.140004	0	0	0	15.2	180.6	146.2	58	Shared	Peak Found	High	Peak Found	Peak Found	High	0	0.0006509	3.32	75.98
FALSE	High	[R].DLTDYLMKILTER.[G]	R	1xAcetyl:2H(3) [K8]	P63267 1xAcetyl:2H(3) [K192]; P60709 1xAcetyl:2H(3) [K191]; P62736 1xAcetyl:2H(3) [K193]; P68133 1xAcetyl:2H(3) [K193]; Q562R1 1xAcetyl:2H(3) [K192]; P68032 1xAcetyl:2H(3) [K193]; P63261 1xAcetyl:2H(3) [K191]	FALSE	0.00113323	0	3	7	51	P60709; Q562R1; P63261	P63267 [185-197]; P60709 [184-196]; P62736 [186-198]; P68133 [186-198]; Q562R1 [185-197]; P68032 [186-198]; P63261 [184-196]	0	1655.88	0	0.503	1.359	0.42	0.645349	0.617471	0.371327	0	0	0	121.9	61.3	165.7	51.1	Shared	High	High	High	High	High	0	0.0001425	4.62	83.95
FALSE	High	[R].DISPVLKDPASFR.[A]	R	1xAcetyl:2H(3) [K7]	P07741 1xAcetyl:2H(3) [K34]	FALSE	0.00497173	0	1	1	3	P07741	P07741 [28-40]	0	1489.81	0	12.723	2.99	6.586	0.00246747	0.487076	0.0278704	0	0	0	17.2	218.4	51.3	113.1		Peak Found	Peak Found	Peak Found	High	High	0	0.0001684	3.76	47.49
FALSE	High	[R].VEKDGLILTSR.[G]	R	1xAcetyl:2H(3) [K3]	Q99497 1xAcetyl:2H(3) [K148]	FALSE	0.0260206	0	1	1	1	Q99497	Q99497 [146-156]	0	1275.73	0	1.886	2.745	0.352	0.473405	0.474115	0.640637	0	0	0	66.9	126.1	183.5	23.6		Peak Found	Peak Found	High	Peak Found	High	0	0.0009773	3.66	36.24
FALSE	High	[R].DLMTDLKSEISGDLAR.[L]	R	1xAcetyl:2H(3) [K7]	P08133 1xAcetyl:2H(3) [K418]	FALSE	4.46301e-05	0	1	1	1	P08133	P08133 [412-427]	0	1808.91	0	0.01	0.01	0.242	4.34403e-17	3.7678e-17	0.289159			0	322.1			77.9		High	Not Found	Not Found	Peak Found	High	0	1.9e-08	4.96	77.48
FALSE	High	[R].DLEAEHVEVEDTTLNR.[C]	R	1xAcetyl:2H(3) [N-Term]	Q9H3K6 1xAcetyl:2H(3) [N-Term]	FALSE	8.58558e-05	0	1	1	3	Q9H3K6	Q9H3K6 [15-30]	0	1914.91	0	0.403	0.36	0.528	0.878802	0.89927	0.872352	0	0	0	174.5	70.4	62.8	92.2		High	Peak Found	Peak Found	Peak Found	High	0	5.766e-08	5.5	41.25
FALSE	High	[R].DLEAEHVEVEDTTLNR.[C]	R			FALSE	0.000121656	0	1	1	13	Q9H3K6	Q9H3K6 [15-30]	0	1869.88	0	0.36	0.253	0.491	0.726906	0.709127	0.872352	0	0	0	190.1	68.5	48.1	93.4		High	High	High	Peak Found	High	0	4.069e-06	5.48	35.33
FALSE	High	[R].DNIQGITKPAIR.[R]	R	1xAcetyl:2H(3) [K8]	P62805 1xAcetyl:2H(3) [K32]	FALSE	0.0152592	0	1	1	52	P62805	P62805 [25-36]	0	1370.78	0	0.976	0.816	0.819	0.92281	0.990565	0.993902	0	0	0	110.8	108.1	90.4	90.7		High	High	High	High	High	0	0.001039	4.06	37.49
FALSE	High	[A].EDVDGEALSTLVLNR.[L]	A	1xGlu->pyro-Glu [N-Term]	P10809 1xGlu->pyro-Glu [N-Term]	FALSE	0.00118277	0	1	1	21	P10809	P10809 [276-290]	0	1612.82	0	1.013	0.033	1.106	0.890109	0.00110578	0.807223	0	0	0	126.9	128.6	4.1	140.4		High	High	Peak Found	High	High	0.001451	0.02079	2.77	59.23
FALSE	High	[M].ALTSFLPAPTQLSQDQLEAEEKAR.[S]	M	1xAcetyl [N-Term]; 1xAcetyl:2H(3) [K22]	Q13573 1xAcetyl [N-Term]; 1xAcetyl:2H(3) [K23]	FALSE	0.0161168	0	1	1	1	Q13573	Q13573 [2-25]	0	2730.4	0	0.199	0.01	0.404	0.367655	3.7678e-17	0.72318	0		0	249.4	49.8		100.9		High	Peak Found	Not Found	Peak Found	High	0	0.0004296	2.73	69.38
FALSE	High	[R].ALQASALKAWGGKKENLKAAQEEYVKR.[A]	R	5xAcetyl:2H(3) [K8; K13; K14; K18; K26]; 1xAcetyl:2H(3) [N-Term]	P04075 5xAcetyl:2H(3) [K312; K317; K318; K322; K330]; 1xAcetyl:2H(3) [N-Term]	FALSE	6.52613e-07	0	1	1	3	P04075	P04075 [305-331]	0	3257.82	0	0.45	0.685	0.804	0.799447	0.965822	0.994778	0	0	0	136.1	61.3	93.3	109.4		High	Peak Found	Peak Found	High	High	0	1.128e-09	8.49	72.14
FALSE	High	[M].ADEKPKEGVKTENNDHINLKVAGQDGSVVQFKIKR.[H]	M	1xAcetyl [N-Term]; 6xAcetyl:2H(3) [K4; K6; K10; K20; K32; K34]	P61956 1xAcetyl [N-Term]; 6xAcetyl:2H(3) [K5; K7; K11; K21; K33; K35]	FALSE	0.000139174	0	1	1	7	P61956	P61956 [2-36]	0	4204.25	0	0.01	2.127	3.958	4.34403e-17	0.601025	0.0215332		0	0	56.5		120.1	223.4		Peak Found	Not Found	High	High	High	0	1.306e-07	4.4	56.03
FALSE	High	[R].VVFLKQLASGLLLVTGPLVLNR.[V]	R	1xAcetyl:2H(3) [K5]	Q02878 1xAcetyl:2H(3) [K166]	FALSE	0.00238855	0	1	1	2	Q02878	Q02878 [162-183]	0	2395.49	0	1.006	1.765	1.846	0.886861	0.736716	0.617327	0	0	0	71.2	71.6	125.7	131.4		Peak Found	Peak Found	High	High	High	0	1.642e-05	4.06	95.45
FALSE	High	[M].ADEEKLPPGWEKR.[M]	M	1xAcetyl [N-Term]; 2xAcetyl:2H(3) [K5; K12]	Q13526 1xAcetyl [N-Term]; 2xAcetyl:2H(3) [K6; K13]; O15428 1xAcetyl [N-Term]; 2xAcetyl:2H(3) [K6; K13]	FALSE	0.00162529	0	1	2	37	Q13526	Q13526 [2-14]; O15428 [2-14]	0	1686.86	0	0.373	0.286	0.699	0.676972	0.556859	0.965892	0	0	0	169.6	63.3	48.4	118.6		High	High	High	High	High	0.0006112	0.01036	2.99	45.58
FALSE	High	[M].ADDVDQQQTTNTVEEPLDLIR.[L]	M	1xAcetyl [N-Term]	P62310 1xAcetyl [N-Term]	FALSE	0.00223327	0	1	1	15	P62310	P62310 [2-22]	0	2442.16	0	0.546	0.542	0.639	0.744139	0.673155	0.886663	0	0	0	146.7	80.1	79.5	93.7		High	High	High	High	High	0	0.0005028	3.8	57.35
FALSE	High	[M].ADDPSAADRNVEIWKIKKLIKSLEAAR.[G]	M	1xAcetyl [N-Term]; 4xAcetyl:2H(3) [K15; K17; K18; K21]	P62495 1xAcetyl [N-Term]; 4xAcetyl:2H(3) [K16; K18; K19; K22]	FALSE	0.0040891	0	1	1	12	P62495	P62495 [2-28]	1	3259.81	0	1.08	1.16	0.921	0.852422	0.902282	0.981221	0	0	0	96.1	103.8	111.5	88.6		High	High	High	High	High	0.0002176	0.005059	4.43	85.49
FALSE	High	[M].ADDKDSLPKLKDLAFLKNQLESLQR.[R]	M	1xAcetyl [N-Term]; 4xAcetyl:2H(3) [K4; K9; K11; K17]	L0R6Q1 1xAcetyl [N-Term]; 4xAcetyl:2H(3) [K5; K10; K12; K18]	FALSE	0.000920571	0	1	1	7	L0R6Q1	L0R6Q1 [2-26]	0	3107.7	0	0.01	0.94	2.625	4.34403e-17	0.949133	0.238447		0	0	87.6		82.4	230		High	Not Found	High	High	High	0	1.578e-05	4.4	88
FALSE	High	[E].VVPNVIEPSFGLGR.[I]	E	1xAcetyl:2H(3) [N-Term]	P41250 1xAcetyl:2H(3) [N-Term]	FALSE	0.00984574	0	1	1	23	P41250	P41250 [570-583]	0	1528.86	0	100	100	100	4.34403e-17	3.7678e-17	4.94188e-17					176.3	98.9	124.8		Not Found	High	High	High	High	0.0002176	0.003748	2.12	63.63
FALSE	High	[E].AAWALTNIASGTSEQTQAVVQSNAVPLFLR.[L]	E	1xAcetyl:2H(3) [N-Term]	O00629 1xAcetyl:2H(3) [N-Term]	FALSE	0.00440008	0	1	1	2	O00629	O00629 [135-164]	0	3188.68	0	100	100	100	4.34403e-17	3.7678e-17	4.94188e-17					133.1	127.3	139.7		Not Found	High	Peak Found	Peak Found	High	0	0.0004296	4.16	82.11
FALSE	High	[M].AAVQAAEVKVDGSEPKLSKNELKR.[R]	M	1xAcetyl [N-Term]; 4xAcetyl:2H(3) [K9; K16; K19; K23]	Q15046 1xAcetyl [N-Term]; 4xAcetyl:2H(3) [K10; K17; K20; K24]	FALSE	1.86813e-06	0	1	1	7	Q15046	Q15046 [2-25]	0	2789.54	0	0.08	0.085	0.167	4.10442e-05	5.18945e-05	0.00248045	0	0	0	300.3	24	25.6	50.2		High	Peak Found	Peak Found	High	High	0	8.545e-11	5.73	57.54
FALSE	High	[W].AAVPGKTFVNITPAEVGVLVGKDR.[S]	W	2xAcetyl:2H(3) [K6; K22]; 1xAcetyl:2H(3) [N-Term]	P07737 2xAcetyl:2H(3) [K38; K54]; 1xAcetyl:2H(3) [N-Term]	FALSE	0.00394194	0	1	1	13	P07737	P07737 [33-56]	0	2573.46	0	1.632	2.503	2.953	0.43909	0.0935844	0.0163748	0	0	0	49.5	80.7	123.8	146		Peak Found	High	High	High	High	0	5.677e-05	3.84	71.74
FALSE	High	[M].AAVLQQVLER.[T]	M	1xAcetyl [N-Term]	P12270 1xAcetyl [N-Term]	FALSE	0.0291882	0	1	1	7	P12270	P12270 [2-11]	0	1168.67	0	0.768	0.924	0.799	0.976309	0.959081	0.99558	0	0	0	114.6	88	105.8	91.6		High	High	High	High	High	0	0.001185	3.31	68.76
FALSE	High	[M].AAVKTLNPKAEVAR.[A]	M	1xAcetyl [N-Term]; 2xAcetyl:2H(3) [K4; K9]	P40227 1xAcetyl [N-Term]; 2xAcetyl:2H(3) [K5; K10]	FALSE	0.00117556	0	1	1	72	P40227	P40227 [2-15]	0	1599.93	0	0.844	0.935	0.657	0.98632	0.955793	0.903507	0	0	0	116.4	98.2	108.9	76.5		High	High	High	High	High	0	0.0002171	4.43	45.73
FALSE	High	[R].VVSSIEQKTEGAEKKQQMAR.[E]	R	3xAcetyl:2H(3) [K8; K14; K15]	P63104 3xAcetyl:2H(3) [K68; K74; K75]	FALSE	1.69845e-05	0	1	1	8	P63104	P63104 [61-80]	0	2382.26	0	0.549	0.861	0.439	0.751166	0.991111	0.42553	0	0	0	140.4	77.1	120.8	61.6		High	Peak Found	High	Peak Found	High	0	3.653e-09	6.3	38.67
FALSE	High	[M].AATTGSGVKVPR.[N]	M	1xAcetyl [N-Term]; 1xAcetyl:2H(3) [K9]	Q13404 1xAcetyl [N-Term]; 1xAcetyl:2H(3) [K10]	FALSE	0.0110537	0	1	1	47	Q13404	Q13404 [2-13]	0	1230.69	0	0.629	0.808	0.673	0.867922	0.985601	0.919342	0	0	0	128.6	80.9	103.9	86.6		High	High	High	High	High	0	0.0002431	3.44	28.66
FALSE	High	[M].AATMKKAAAEDVNVTFEDQQKINKFAR.[N]	M	1xAcetyl [N-Term]; 4xAcetyl:2H(3) [K5; K6; K21; K24]	Q9NQP4 1xAcetyl [N-Term]; 4xAcetyl:2H(3) [K6; K7; K22; K25]	FALSE	0.000585579	0	1	1	3	Q9NQP4	Q9NQP4 [2-28]	0	3246.69	0	0.56	0.66	0.266	0.913078	0.955793	0.240909	0	0	0	160.9	90.1	106.3	42.7		High	Peak Found	Peak Found	Peak Found	High	0	1.516e-06	5.14	69.6
FALSE	High	[M].AATLILEPAGR.[C]	M	1xAcetyl:2H(3) [N-Term]	Q86TX2 1xAcetyl:2H(3) [N-Term]; P49753 1xAcetyl:2H(3) [N-Term]	FALSE	0.0220957	0	1	2	5	P49753	Q86TX2 [2-12]; P49753 [64-74]	0	1156.68	0	0.962	1.024	0.908	0.915733	0.921739	0.962942	0	0	0	102.7	98.8	105.2	93.3		High	High	High	High	High	0	0.0007355	3.3	52.16
FALSE	High	[E].AATGGGSTGEADGKTAAAAAEHSQR.[E]	E	1xAcetyl:2H(3) [K14]; 1xAcetyl:2H(3) [N-Term]	O43242 1xAcetyl:2H(3) [K54]; 1xAcetyl:2H(3) [N-Term]	FALSE	2.19577e-05	0	1	1	10	O43242	O43242 [41-65]	0	2362.11	0	100	100	100	4.34403e-17	3.7678e-17	4.94188e-17					162	60	178		Not Found	High	High	High	High	0	5.686e-09	5.73	27.7
FALSE	High	[M].AATASAGAGGIDGKPR.[T]	M	1xAcetyl [N-Term]; 1xAcetyl:2H(3) [K14]	Q02978 1xAcetyl [N-Term]; 1xAcetyl:2H(3) [K15]	FALSE	0.0149835	0	1	1	5	Q02978	Q02978 [2-17]	0	1486.77	0	1.578	1.886	0.581	0.437198	0.264353	0.797254	0	0	0	79.3	125.1	149.6	46.1		High	High	High	High	High	0	0.0005592	3.33	28.16
FALSE	High	[M].AATALLEAGLAR.[V]	M	1xAcetyl:2H(3) [N-Term]	Q8WUK0 1xAcetyl:2H(3) [N-Term]	FALSE	0.00244765	0	1	1	6	Q8WUK0	Q8WUK0 [2-13]	0	1201.7	0	4.972	3.174	4.721	0.0659764	0.443516	0.0562251	0	0	0	28.8	143.4	91.6	136.2		Peak Found	High	High	Peak Found	High	0	1.717e-05	4.09	61.92
FALSE	High	[E].AASILQELQVETYGSMEKKER.[V]	E	2xAcetyl:2H(3) [K18; K19]; 1xAcetyl:2H(3) [N-Term]	O00232 2xAcetyl:2H(3) [K179; K180]; 1xAcetyl:2H(3) [N-Term]	FALSE	0.000363472	0	1	1	1	O00232	O00232 [162-182]	0	2545.32	0	100	100	100	4.34403e-17	3.7678e-17	4.94188e-17					107.6	127.7	164.6		Not Found	Peak Found	Peak Found	High	High	0	6.713e-07	4.42	78.22
FALSE	High	[M].AASKPVEAAVVAAAVPSSGSGVGGGGTAGPGTGGLPR.[W]	M	1xAcetyl [N-Term]; 1xAcetyl:2H(3) [K4]	O94826 1xAcetyl [N-Term]; 1xAcetyl:2H(3) [K5]	FALSE	0.0093773	0	1	1	2	O94826	O94826 [2-38]	0	3204.67	0	0.09	0.01	0.158	0.0274441	3.7678e-17	0.0570908	0		0	320.6	28.8		50.6		High	Peak Found	Not Found	Peak Found	High	0	0.0001688	4.06	57.61
FALSE	High	[M].AASAAAASAAAASAASGSPGPGEGSAGGEKR.[S]	M	1xAcetyl [N-Term]; 1xAcetyl:2H(3) [K30]	Q13263 1xAcetyl [N-Term]; 1xAcetyl:2H(3) [K31]	FALSE	4.58955e-06	0	1	1	14	Q13263	Q13263 [2-32]	0	2630.25	0	0.033	0.023	0.092	5.27928e-09	5.64102e-11	1.32085e-05	0	0	0	348.3	11.4	8.2	32.1		High	High	High	High	High	0	3.953e-10	7.38	40.52
FALSE	High	[Y].AAQTSPSPKAGAATGR.[I]	Y	1xAcetyl:2H(3) [K9]; 1xAcetyl:2H(3) [N-Term]	P06576 1xAcetyl:2H(3) [K55]; 1xAcetyl:2H(3) [N-Term]	FALSE	0.00432019	0	1	1	43	P06576	P06576 [47-62]	0	1560.82	0	0.362	0.308	0.324	0.27798	0.133974	0.136819	0	0	0	200.6	72.6	61.8	65		High	High	High	High	High	6.911e-05	0.001862	4.08	21.52
FALSE	High	[M].ADEIAKAQVARPGGDTIFGKIIR.[K]	M	1xAcetyl [N-Term]; 2xAcetyl:2H(3) [K6; K20]	P49773 1xAcetyl [N-Term]; 2xAcetyl:2H(3) [K7; K21]	FALSE	2.70318e-05	0	1	1	12	P49773	P49773 [2-24]	0	2558.42	0	0.339	0.632	0.419	0.224359	0.841258	0.368202	0	0	0	167.4	56.8	105.7	70.1		High	High	High	High	High	0	6.773e-05	5.37	63.29
FALSE	High	[E].VYAVDVLVSSGEGKAKDAGQR.[T]	E	2xAcetyl:2H(3) [K14; K16]; 1xAcetyl:2H(3) [N-Term]	Q9UQ80 2xAcetyl:2H(3) [K236; K238]; 1xAcetyl:2H(3) [N-Term]	FALSE	2.63098e-06	0	1	1	9	Q9UQ80	Q9UQ80 [223-243]	0	2284.21	0	13.167	16.226	9.66	6.00655e-07	8.06072e-08	4.08804e-07	0	0	0	10	131.5	162	96.5		Peak Found	High	High	High	High	0	1.537e-10	5.44	70
FALSE	High	[M].VVEHPEFLKAGKEPGLQIWR.[V]	M	2xAcetyl:2H(3) [K9; K12]; 1xAcetyl:2H(3) [N-Term]	P06396 2xAcetyl:2H(3) [K61; K64]; 1xAcetyl:2H(3) [N-Term]	FALSE	0.001686	0	1	1	2	P06396	P06396 [53-72]	0	2468.36	0	0.01	0.01	0.01	4.34403e-17	3.7678e-17	4.94188e-17				400					High	Not Found	Not Found	Not Found	High	0	2.18e-05	4.78	63.25
FALSE	High	[M].ADGQVAELLLR.[R]	M	1xAcetyl [N-Term]	Q9Y285 1xAcetyl [N-Term]	FALSE	0.0055833	0	1	1	12	Q9Y285	Q9Y285 [2-12]	0	1226.67	0	0.344	0.42	0.478	0.23339	0.376457	0.542015	0	0	0	178.5	61.3	74.9	85.3		High	High	High	High	High	0.001451	0.02118	3.53	61.9
FALSE	High	[R].AEDGENYDIKKQAEILQESR.[M]	R	2xAcetyl:2H(3) [K10; K11]	O75347 2xAcetyl:2H(3) [K51; K52]	FALSE	0.000281153	0	1	1	4	O75347	O75347 [42-61]	0	2426.2	0	0.309	0.192	0.367	0.4976	0.343374	0.486207	0	0	0	214.2	66.2	41.1	78.5		High	High	High	Peak Found	High	0	4.318e-07	5.78	47.62
FALSE	High	[M].AEASAAGADSGAAVAAHR.[F]	M	1xAcetyl [N-Term]	Q9Y4L5 1xAcetyl [N-Term]	FALSE	5.46085e-05	0	1	1	1	Q9Y4L5	Q9Y4L5 [2-19]	0	1624.77	0	0.01	0.01	0.01	4.34403e-17	3.7678e-17	4.94188e-17				400					High	Not Found	Not Found	Not Found	High	0	2.652e-08	5.51	22.71
FALSE	High	[R].AEAIKALVKPKEVKPKIPKGVSR.[K]	R	6xAcetyl:2H(3) [K5; K9; K11; K14; K16; K19]	P47914 6xAcetyl:2H(3) [K73; K77; K79; K82; K84; K87]	FALSE	0.0293651	0	1	1	3	P47914	P47914 [69-91]	0	2756.73	0	0.442	0.507	0.657	0.851475	0.957205	0.962942	0	0	0	153.5	67.8	77.9	100.8		High	Peak Found	Peak Found	Peak Found	High	6.911e-05	0.001718	3.23	53.94
FALSE	High	[E].VTDFAGQYVKDADKSIIR.[T]	E	2xAcetyl:2H(3) [K10; K14]; 1xAcetyl:2H(3) [N-Term]	P41252 2xAcetyl:2H(3) [K371; K375]; 1xAcetyl:2H(3) [N-Term]	FALSE	0.000232606	0	1	1	2	P41252	P41252 [362-379]	0	2161.15	0	100	100	100	4.34403e-17	3.7678e-17	4.94188e-17					124	121.3	154.7		Not Found	High	Peak Found	Peak Found	High	0	3.123e-07	4.52	67.14
FALSE	High	[E].AEAAAGAAAEDSGAAR.[G]	E	1xAcetyl:2H(3) [N-Term]	O14562 1xAcetyl:2H(3) [N-Term]	FALSE	0.000218809	0	1	1	4	O14562	O14562 [36-51]	0	1433.67	0	24.106	36.989	15.94	2.33634e-06	1.50452e-09	2.07437e-05	0	0	0	5.1	123.6	189.6	81.7		Peak Found	High	High	Peak Found	High	0	2.829e-07	4.06	27.98
FALSE	High	[Y].AEAAAAPAAASGPNQMSFTFASPTQVFFNGANVR.[Q]	Y	1xAcetyl:2H(3) [N-Term]	P30049 1xAcetyl:2H(3) [N-Term]	FALSE	0.00850596	0	1	1	1	P30049	P30049 [23-56]	0	3443.65	0	0.084	0.321	0.56	0.0351543	0.825584	0.903507	0	0	0	203.5	17.1	65.4	114		Peak Found	Peak Found	High	Peak Found	High	0	0.0001429	4.13	69.96
FALSE	High	[M].ADVVVGKDKGGEQR.[L]	M	1xAcetyl [N-Term]; 2xAcetyl:2H(3) [K7; K9]	Q9NRG0 1xAcetyl [N-Term]; 2xAcetyl:2H(3) [K8; K10]	FALSE	0.00619383	0	1	1	4	Q9NRG0	Q9NRG0 [2-15]	0	1589.84	0	1.167	1.286	0.772	0.803089	0.75464	0.994778	0	0	0	94.7	110.5	121.8	73.1		High	High	High	High	High	0	8.644e-05	3.8	35.23
FALSE	High	[E].ADVVLLVGTNPR.[F]	E	1xAcetyl:2H(3) [N-Term]	P28331 1xAcetyl:2H(3) [N-Term]	FALSE	0.0128703	0	1	1	8	P28331	P28331 [397-408]	0	1298.75	0	100	100	100	4.34403e-17	3.7678e-17	4.94188e-17					150.9	135.5	113.6		Not Found	High	Peak Found	Peak Found	High	0.0003196	0.00869	2.84	57.8
FALSE	High	[M].ADSELQLVEQR.[I]	M	1xAcetyl [N-Term]	P07741 1xAcetyl [N-Term]	FALSE	0.0220957	0	1	1	30	P07741	P07741 [2-12]	0	1329.66	0	0.419	0.553	0.491	0.430922	0.698231	0.581606	0	0	0	162.4	68.1	89.7	79.8		High	High	High	High	High	0.002517	0.03097	2.74	44.33
FALSE	High	[D].ADPSTKDFLLQQTMLR.[V]	D	1xAcetyl:2H(3) [K6]	Q04760 1xAcetyl:2H(3) [K28]	FALSE	0.011465	0	1	1	1	Q04760	Q04760 [23-38]	0	1908.99	0														No Quan Values	Not Found	Not Found	Not Found	High	High	0	0.0002384	3.59
FALSE	High	[M].ADPKYADLPGIAR.[N]	M	1xAcetyl [N-Term]; 1xAcetyl:2H(3) [K4]	Q13561 1xAcetyl [N-Term]; 1xAcetyl:2H(3) [K5]	FALSE	0.00820041	0	1	1	5	Q13561	Q13561 [2-14]	0	1473.78	0	0.01	0.01	0.01	4.34403e-17	3.7678e-17	4.94188e-17				400					High	Not Found	Not Found	Not Found	High	0.0006551	0.01149	1.42	49.76
FALSE	High	[R].VTIMPKDIQLAR.[R]	R	1xAcetyl:2H(3) [K6]	P84243 1xAcetyl:2H(3) [K123]; Q16695 1xAcetyl:2H(3) [K123]; Q6NXT2 1xAcetyl:2H(3) [K122]; P68431 1xAcetyl:2H(3) [K123]; Q71DI3 1xAcetyl:2H(3) [K123]	FALSE	0.0200531	0	1	5	14	P68431	P84243 [118-129]; Q16695 [118-129]; Q6NXT2 [117-128]; P68431 [118-129]; Q71DI3 [118-129]	0	1429.83	0	0.57	0.554	0.546	0.786305	0.701664	0.72318	0	0	0	149.8	85.4	83	81.8		High	High	High	High	High	0.004501	0.05168	2.91	46.06
FALSE	High	[E].VTQPSLGVGYELGR.[A]	E	1xAcetyl:2H(3) [N-Term]	O43598 1xAcetyl:2H(3) [N-Term]	FALSE	0.000712114	0	1	1	21	O43598	O43598 [94-107]	0	1520.81	0	38.119	23.558	27.408	1.00621e-06	0.0154648	8.04603e-07	0	0	0	4.4	169.3	104.6	121.7		Peak Found	High	High	High	High	0	2.11e-06	3.47	50.31
FALSE	High	[E].VVACSVDSQFTHLAWINTPR.[R]	E	1xCarbamidomethyl [C4]; 1xAcetyl:2H(3) [N-Term]	Q13162 1xCarbamidomethyl [C148]; 1xAcetyl:2H(3) [N-Term]	FALSE	0.00224696	0	1	1	1	Q13162	Q13162 [145-164]	0	2346.17	0	0.297	0.196	0.731	0.599646	0.615001	0.985609	0	0	0	179.9	53.4	35.2	131.4		Peak Found	High	Peak Found	Peak Found	High	0	1.49e-05	5.13	63.43
FALSE	High	[R].ADILEDKDGKSR.[G]	R	2xAcetyl:2H(3) [K7; K10]	P52272 2xAcetyl:2H(3) [K239; K242]	FALSE	0.0137609	0	1	1	5	P52272	P52272 [233-244]	0	1436.75	0	1.094	0.403	1.462	0.841906	0.334431	0.435569	0	0	0	101	110.5	40.7	147.7		High	High	Peak Found	High	High	0	0.0009637	4.19	31.3
FALSE	High	[M].ADLDKLNIDSIIQR.[L]	M	1xAcetyl [N-Term]; 1xAcetyl:2H(3) [K5]	P36873 1xAcetyl [N-Term]; 1xAcetyl:2H(3) [K6]	FALSE	0.00211377	0	1	1	11	P36873	P36873 [2-15]	0	1700.93	0	0.544	0.723	0.587	0.739751	0.942748	0.807223	0	0	0	140.1	76.2	101.4	82.3		High	High	High	High	High	0.0008759	0.01447	2.89	66.86
FALSE	High	[M].ADKPDMGEIASFDKAKLKKTETQEKNTLPTKETIEQEKR.[S]	M	1xAcetyl [N-Term]; 8xAcetyl:2H(3) [K3; K14; K16; K18; K19; K25; K31; K38]	P63313 1xAcetyl [N-Term]; 8xAcetyl:2H(3) [K4; K15; K17; K19; K20; K26; K32; K39]	FALSE	0.000236912	0	1	1	3	P63313	P63313 [2-40]	0	4878.57	0	0.01	0.01	0.01	4.34403e-17	3.7678e-17	4.94188e-17				400					High	Not Found	Not Found	Not Found	High	0	3.226e-07	5.69	69.79
FALSE	High	[E].VVATNGDTHLGGEDFDQR.[V]	E	1xAcetyl:2H(3) [N-Term]	P11021 1xAcetyl:2H(3) [N-Term]	FALSE	8.85212e-05	0	1	1	8	P11021	P11021 [244-261]	0	1975.92	0	100	100	100	4.34403e-17	3.7678e-17	4.94188e-17					155.7	103.2	141.1		Not Found	High	High	High	High	0	7.41e-07	5.26	38.27
FALSE	High	[M].ADKMDMSLDDIIKLNR.[S]	M	1xAcetyl [N-Term]; 2xAcetyl:2H(3) [K3; K13]	Q86V81 1xAcetyl [N-Term]; 2xAcetyl:2H(3) [K4; K14]	FALSE	0.000472772	0	1	1	10	Q86V81	Q86V81 [2-17]	0	2010.02	0	0.786	1.02	0.917	0.985294	0.908672	0.948642	0	0	0	107.4	84.5	109.6	98.5		High	High	High	High	High	0	1.915e-05	4.24	71.79
FALSE	High	[M].ADKEKKKKESILDLSKYIDKTIR.[V]	M	1xAcetyl [N-Term]; 7xAcetyl:2H(3) [K3; K5; K6; K7; K8; K16; K20]	Q9UK45 1xAcetyl [N-Term]; 7xAcetyl:2H(3) [K4; K6; K7; K8; K9; K17; K21]	FALSE	4.77352e-05	0	1	1	20	Q9UK45	Q9UK45 [2-24]	0	3106.8	0	0.496	1.194	1.278	0.63072	0.771176	0.622253	0	0	0	100.8	50	120.3	128.8		High	High	High	High	High	0	2.13e-08	5.8	85.98
FALSE	High	[M].ADKEAAFDDAVEER.[V]	M	1xAcetyl [N-Term]; 1xAcetyl:2H(3) [K3]	Q09028 1xAcetyl [N-Term]; 1xAcetyl:2H(3) [K4]	FALSE	0.000790104	0	1	1	23	Q09028	Q09028 [2-15]	0	1652.75	0	0.358	0.254	0.511	0.267095	0.0598556	0.632729	0	0	0	188.5	67.4	47.8	96.3		High	High	High	High	High	0.001207	0.01893	2.9	48.83
FALSE	High	[M].ADHSFSDGVPSDSVEAAKNASNTEKLTDQVMQNPR.[V]	M	1xAcetyl [N-Term]; 2xAcetyl:2H(3) [K18; K25]	Q99733 1xAcetyl [N-Term]; 2xAcetyl:2H(3) [K19; K26]	FALSE	0.0153522	0	1	1	4	Q99733	Q99733 [2-36]	0	3877.81	0	0.01	0.01	0.01	4.34403e-17	3.7678e-17	4.94188e-17				400					High	Not Found	Not Found	Not Found	High	0	0.0005254	3.66	53.68
FALSE	High	[E].VVAVHPGGDTVAIGGVDGNVR.[L]	E	1xAcetyl:2H(3) [N-Term]	O75083 1xAcetyl:2H(3) [N-Term]	FALSE	2.33629e-07	0	1	1	9	O75083	O75083 [450-470]	0	2034.08	0	23.112	27.538	16.366	1.22993e-09	1.67613e-10	4.70177e-10	0	0	0	5.9	135.9	161.9	96.2		Peak Found	High	High	High	High	0	3.583e-11	5.81	44.11
FALSE	High	[M].ADGELNVDSLITR.[L]	M	1xAcetyl [N-Term]	P62140 1xAcetyl [N-Term]	FALSE	0.00380008	0	1	1	8	P62140	P62140 [2-14]	0	1444.73	0	0.447	0.743	0.484	0.809138	0.990877	0.774052	0	0	0	149.6	66.9	111.1	72.4		High	Peak Found	Peak Found	High	High	6.911e-05	0.00157	2.3	55.18
FALSE	High	[E].AAQLALEQMNSVMLGGR.[N]	E	1xAcetyl:2H(3) [N-Term]	Q9UHX1 1xAcetyl:2H(3) [N-Term]	FALSE	0.000403286	0	1	1	2	Q9UHX1	Q9UHX1 [182-198]	0	1833.94	0	58.975	73.069	56.74	8.23826e-09	1.31991e-06	3.03828e-10	0	0	0	2.1	124.3	154	119.6		Peak Found	High	Peak Found	High	High	0	8.018e-07	4.59	73.97
FALSE	High	[M].AAQGEPQVQFKLVLVGDGGTGKTTFVKR.[H]	M	1xAcetyl [N-Term]; 3xAcetyl:2H(3) [K11; K22; K27]	P62826 1xAcetyl [N-Term]; 3xAcetyl:2H(3) [K12; K23; K28]	FALSE	0.00208809	0	1	1	14	P62826	P62826 [2-29]	0	3108.7	0	0.194	0.21	0.265	0.203152	0.33781	0.204529	0	0	0	239.7	46.4	50.4	63.5		High	High	High	High	High	0	0.0002635	4.2	69.43
FALSE	High	[M].AAPEGSGLGEDAR.[L]	M	1xAcetyl [N-Term]	Q96G03 1xAcetyl [N-Term]	FALSE	0.011964	0	1	1	16	Q96G03	Q96G03 [2-14]	0	1271.59	0	0.214	0.251	0.247	0.228451	0.441191	0.192081	0	0	0	233.6	50	58.6	57.8		High	Peak Found	High	High	High	0	0.0002561	3.18	25.27
FALSE	High	[R].AAEDDEDDDVDTKKQKTDEDD.[-]	R	3xAcetyl:2H(3) [K13; K14; K16]	P06454 3xAcetyl:2H(3) [K103; K104; K106]	FALSE	0.00046135	0	1	1	8	P06454	P06454 [91-111]	0	2532.06	0	0.01	0.01	0.01	4.34403e-17	3.7678e-17	4.94188e-17				400					High	Not Found	Not Found	Not Found	High	0	3.07e-06	4.08	30.37
FALSE	High	[E].AAAVLSKEGVECEVINMR.[T]	E	1xCarbamidomethyl [C12]; 1xAcetyl:2H(3) [K7]; 1xAcetyl:2H(3) [N-Term]	P11177 1xCarbamidomethyl [C263]; 1xAcetyl:2H(3) [K258]; 1xAcetyl:2H(3) [N-Term]	FALSE	0.0184202	0	1	1	1	P11177	P11177 [252-269]	0	2066.05	0	100	100	100	4.34403e-17	3.7678e-17	4.94188e-17					88.2	136.9	174.9		Not Found	Peak Found	High	Peak Found	High	0	0.0005355	3.43	66
FALSE	High	[R].YESLTDPSKLDSGKELKIDIIPNPQER.[T]	R	3xAcetyl:2H(3) [K9; K14; K17]	P08238 3xAcetyl:2H(3) [K64; K69; K72]; Q58FF7 3xAcetyl:2H(3) [K64; K69; K72]	FALSE	0.00654355	0	1	2	11	P08238	P08238 [56-82]; Q58FF7 [56-82]	0	3220.69	0	0.01	0.01	1.095	4.34403e-17	3.7678e-17	0.858779			0	190.9			209.1		Peak Found	Not Found	Not Found	High	High	0.0002176	0.006224	3.54	62.98
FALSE	High	[M].AAAVAMETDDAGNR.[L]	M	1xAcetyl [N-Term]	Q9Y3C7 1xAcetyl [N-Term]	FALSE	0.0093773	0	1	1	4	Q9Y3C7	Q9Y3C7 [2-15]	0	1433.63	0	0.402	0.31	0.757	0.801129	0.800232	0.987852	0	0	0	162	65.1	50.2	122.7		High	Peak Found	Peak Found	Peak Found	High	0	0.0002315	3.7	35.89
FALSE	High	[M].AAATLTSKLYSLLFR.[R]	M	1xAcetyl:2H(3) [K8]; 1xAcetyl:2H(3) [N-Term]	Q9UDW1 1xAcetyl:2H(3) [K9]; 1xAcetyl:2H(3) [N-Term]	FALSE	0.00149201	0	1	1	18	Q9UDW1	Q9UDW1 [2-16]	0	1745.01	0	0.923	2.771	8.354	0.923552	0.507868	0.00225692	0	0	0	30.7	28.3	84.9	256.1		High	High	High	High	High	0	7.436e-06	4.41	99.7
FALSE	High	[M].AAATGPSFWLGNETLKVPLALFALNR.[Q]	M	1xAcetyl [N-Term]; 1xAcetyl:2H(3) [K16]	P12955 1xAcetyl [N-Term]; 1xAcetyl:2H(3) [K17]	FALSE	0.000289881	0	1	1	33	P12955	P12955 [2-27]	0	2844.55	0	0.53	0.803	1.076	0.713466	0.982521	0.834597	0	0	0	117.3	62.2	94.2	126.3		High	High	High	High	High	0	4.569e-07	4.99	93.65
[truncated: 1,379 more rows]
