# Supplementary material for: An SDS-PAGE based proteomic approach for N-terminome profiling
Source: Royal Society of Chemistry journal article supplement (doi:10.1039/c9an01616c), 2019-01-01
Supplement: c9an01616c3.xlsx [file c9an01616c3.xlsx]

## Sheet: Table-S2
PSMId	score	q-value	posterior_error_prob	peptide	proteinIds
U87MG_100ug_NHS_Rep1_5Frac_Frac-1_SII_17525_1_17525_3_1	5.37128	4.41421e-05	2.91332e-21	R.IAEFTTNLTEEEEK[UNIMOD:56]SK[UNIMOD:56]SLAK[UNIMOD:56]LK[UNIMOD:56]NK[UNIMOD:56]HEAMITDLEER.L	sp|P35579|MYH9_HUMAN
U87MG_100ug_NHS_Rep1_5Frac_Frac-4_SII_16720_1_16720_3_1	4.75789	4.41421e-05	5.42968e-19	R.K[UNIMOD:56]EAESC[UNIMOD:4]DC[UNIMOD:4]LQGFQLTHSLGGGTGSGMGTLLLSK[UNIMOD:56]IR.E	sp|Q3ZCM7|TBB8_HUMAN
U87MG_100ug_NHS_Rep1_5Frac_Frac-1_SII_17461_1_17461_3_1	4.75533	4.41421e-05	5.54942e-19	R.IAEFTTNLTEEEEK[UNIMOD:56]SK[UNIMOD:56]SLAK[UNIMOD:56]LK[UNIMOD:56]NK[UNIMOD:56]HEAMITDLEER.L	sp|P35579|MYH9_HUMAN
U87MG_100ug_NHS_Rep1_5Frac_Frac-1_SII_18907_1_18907_3_1	4.56899	4.41421e-05	2.71615e-18	-.[UNIMOD:1]MENAHTK[UNIMOD:56]TVEEVLGHFGVNESTGLSLEQVK[UNIMOD:56]K[UNIMOD:56]LK[UNIMOD:56]ER.W	sp|P16615|AT2A2_HUMAN
U87MG_100ug_NHS_Rep1_5Frac_Frac-4_SII_16695_1_16695_3_1	4.53535	4.41421e-05	3.61773e-18	R.K[UNIMOD:56]EAESC[UNIMOD:4]DC[UNIMOD:4]LQGFQLTHSLGGGTGSGMGTLLLSK[UNIMOD:56]IR.E	sp|Q3ZCM7|TBB8_HUMAN
U87MG_100ug_NHS_Rep1_5Frac_Frac-3_SII_12783_1_12783_3_1	4.44943	4.41421e-05	7.52415e-18	-.[UNIMOD:1]METEQPEETFPNTETNGEFGK[UNIMOD:56]RPAEDMEEEQAFK[UNIMOD:56]R.S	sp|P61978|HNRPK_HUMAN
U87MG_100ug_NHS_Rep1_5Frac_Frac-1_SII_21125_1_21125_3_1	4.39572	4.41421e-05	1.18925e-17	R.TTDLLTDWEK[UNIMOD:56]TK[UNIMOD:56]PVTGNLRPEEALQALTIYEGK[UNIMOD:56]FGR.L	sp|Q14204|DYHC1_HUMAN
U87MG_100ug_NHS_Rep1_5Frac_Frac-4_SII_16706_1_16706_3_1	4.37024	4.41421e-05	1.47772e-17	R.K[UNIMOD:56]EAESC[UNIMOD:4]DC[UNIMOD:4]LQGFQLTHSLGGGTGSGMGTLLISK[UNIMOD:56]IR.E	sp|P07437|TBB5_HUMAN
U87MG_100ug_NHS_Rep1_5Frac_Frac-3_SII_15609_1_15609_3_1	4.21069	4.41421e-05	5.75585e-17	R.[UNIMOD:56]TTGIVMDSGDGVTHTVPIYEGYALPHAILR.L	sp|P60709|ACTB_HUMAN
U87MG_100ug_NHS_Rep1_5Frac_Frac-3_SII_16005_1_16005_3_1	4.18898	4.41421e-05	6.92601e-17	R.TATESFASDPILYRPVAVALDTK[UNIMOD:56]GPEIR.T	sp|P14618|KPYM_HUMAN
U87MG_100ug_NHS_Rep1_5Frac_Frac-4_SII_16686_1_16686_3_1	4.18327	4.41421e-05	7.27128e-17	R.K[UNIMOD:56]EAESC[UNIMOD:4]DC[UNIMOD:4]LQGFQLTHSLGGGTGSGMGTLLISK[UNIMOD:56]IR.E	sp|P07437|TBB5_HUMAN
U87MG_100ug_NHS_Rep1_5Frac_Frac-4_SII_15902_1_15902_3_1	4.17057	4.41421e-05	8.10274e-17	R.[UNIMOD:56]SWTAADMAAQTTK[UNIMOD:56]HK[UNIMOD:56]WEAAHVAEQLR.A	sp|P01892|1A02_HUMAN
U87MG_100ug_NHS_Rep1_5Frac_Frac-1_SII_14941_1_14941_3_1	4.15501	4.41421e-05	9.25178e-17	R.TATESFASDPILYRPVAVALDTK[UNIMOD:56]GPEIR.T	sp|P14618|KPYM_HUMAN
U87MG_100ug_NHS_Rep1_5Frac_Frac-2_SII_8490_1_8490_3_1	4.07563	4.41421e-05	1.81982e-16	R.AELK[UNIMOD:56]TAMSTPHVAEPAENEQDEQDENGAEASADLR.A	sp|P26038|MOES_HUMAN
U87MG_100ug_NHS_Rep1_5Frac_Frac-4_SII_15446_1_15446_3_1	4.07454	4.41421e-05	1.8368e-16	R.[UNIMOD:56]TTGIVMDSGDGVTHTVPIYEGYALPHAILR.L	sp|P60709|ACTB_HUMAN
U87MG_100ug_NHS_Rep1_5Frac_Frac-3_SII_16881_1_16881_3_1	4.00157	4.41421e-05	3.42079e-16	R.K[UNIMOD:56]EAESC[UNIMOD:4]DC[UNIMOD:4]LQGFQLTHSLGGGTGSGMGTLLLSK[UNIMOD:56]IR.E	sp|Q3ZCM7|TBB8_HUMAN
U87MG_100ug_NHS_Rep1_5Frac_Frac-4_SII_14492_1_14492_3_1	3.96137	4.41421e-05	4.81874e-16	R.[UNIMOD:56]TTGIVM[UNIMOD:35]DSGDGVTHTVPIYEGYALPHAILR.L	sp|P60709|ACTB_HUMAN
U87MG_100ug_NHS_Rep1_5Frac_Frac-4_SII_15354_1_15354_3_1	3.95383	4.41421e-05	5.13878e-16	R.[UNIMOD:56]TTGIVMDSGDGVTHTVPIYEGYALPHAILR.L	sp|P60709|ACTB_HUMAN
U87MG_100ug_NHS_Rep1_5Frac_Frac-1_SII_15029_1_15029_3_1	3.95316	4.41421e-05	5.16783e-16	R.K[UNIMOD:56]DGNASGTTLLEALDC[UNIMOD:4]ILPPTRPTDK[UNIMOD:56]PLR.L	sp|P68104|EF1A1_HUMAN
U87MG_100ug_NHS_Rep1_5Frac_Frac-1_SII_15557_1_15557_3_1	3.93811	4.41421e-05	5.87524e-16	-.[UNIMOD:1]SK[UNIMOD:56]PHSEAGTAFIQTQQLHAAMADTFLEHMC[UNIMOD:4]R.L	sp|P14618|KPYM_HUMAN
U87MG_100ug_NHS_Rep1_5Frac_Frac-4_SII_15471_1_15471_3_1	3.91708	4.41421e-05	7.0288e-16	R.[UNIMOD:56]TTGIVMDSGDGVTHTVPIYEGYALPHAILR.L	sp|P60709|ACTB_HUMAN
U87MG_100ug_NHS_Rep1_5Frac_Frac-3_SII_15664_1_15664_3_1	3.91272	4.41421e-05	7.29485e-16	-.[UNIMOD:1]SK[UNIMOD:56]PHSEAGTAFIQTQQLHAAMADTFLEHMC[UNIMOD:4]R.L	sp|P14618|KPYM_HUMAN
U87MG_100ug_NHS_Rep1_5Frac_Frac-1_SII_16040_1_16040_3_1	3.90619	4.41421e-05	7.71221e-16	R.TATESFASDPILYRPVAVALDTK[UNIMOD:56]GPEIR.T	sp|P14618|KPYM_HUMAN
U87MG_100ug_NHS_Rep1_5Frac_Frac-3_SII_15913_1_15913_4_1	3.90425	4.41421e-05	7.84079e-16	-.[UNIMOD:1]SK[UNIMOD:56]PHSEAGTAFIQTQQLHAAMADTFLEHMC[UNIMOD:4]R.L	sp|P14618|KPYM_HUMAN
U87MG_100ug_NHS_Rep1_5Frac_Frac-4_SII_13908_1_13908_3_1	3.90281	4.41421e-05	7.93738e-16	R.TTGIVMDSGDGVTHTVPIYEGYALPHAILR.L	sp|P60709|ACTB_HUMAN
U87MG_100ug_NHS_Rep1_5Frac_Frac-5_SII_21301_1_21301_3_1	3.89604	4.41421e-05	8.40875e-16	R.VLMEK[UNIMOD:56]EFPGFLENQK[UNIMOD:56]DPLAVDK[UNIMOD:56]IMK[UNIMOD:56]DLDQC[UNIMOD:4]R.D	sp|P60903|S10AA_HUMAN
U87MG_100ug_NHS_Rep1_5Frac_Frac-3_SII_15538_1_15538_3_1	3.88817	4.41421e-05	8.99204e-16	-.[UNIMOD:1]SK[UNIMOD:56]PHSEAGTAFIQTQQLHAAMADTFLEHMC[UNIMOD:4]R.L	sp|P14618|KPYM_HUMAN
U87MG_100ug_NHS_Rep1_5Frac_Frac-3_SII_15699_1_15699_3_1	3.88329	4.41421e-05	9.37457e-16	-.[UNIMOD:1]SK[UNIMOD:56]PHSEAGTAFIQTQQLHAAMADTFLEHMC[UNIMOD:4]R.L	sp|P14618|KPYM_HUMAN
U87MG_100ug_NHS_Rep1_5Frac_Frac-5_SII_17651_1_17651_4_1	3.87036	4.41421e-05	1.04666e-15	-.[UNIMOD:1]APK[UNIMOD:56]AK[UNIMOD:56]K[UNIMOD:56]EAPAPPK[UNIMOD:56]AEAK[UNIMOD:56]AK[UNIMOD:56]ALK[UNIMOD:56]AK[UNIMOD:56]K[UNIMOD:56]AVLK[UNIMOD:56]GVHSHK[UNIMOD:56]K[UNIMOD:56]K[UNIMOD:56]K[UNIMOD:56]IR.T	sp|P62750|RL23A_HUMAN
U87MG_100ug_NHS_Rep1_5Frac_Frac-5_SII_16030_1_16030_3_1	3.86754	4.41421e-05	1.07205e-15	R.TATESFASDPILYRPVAVALDTK[UNIMOD:56]GPEIR.T	sp|P14618|KPYM_HUMAN
U87MG_100ug_NHS_Rep1_5Frac_Frac-4_SII_14520_1_14520_3_1	3.8613	4.41421e-05	1.13062e-15	R.[UNIMOD:56]TTGIVM[UNIMOD:35]DSGDGVTHTVPIYEGYALPHAILR.L	sp|P60709|ACTB_HUMAN
U87MG_100ug_NHS_Rep1_5Frac_Frac-1_SII_17792_1_17792_4_1	3.83974	4.41421e-05	1.35874e-15	-.[UNIMOD:1]APK[UNIMOD:56]AK[UNIMOD:56]K[UNIMOD:56]EAPAPPK[UNIMOD:56]AEAK[UNIMOD:56]AK[UNIMOD:56]ALK[UNIMOD:56]AK[UNIMOD:56]K[UNIMOD:56]AVLK[UNIMOD:56]GVHSHK[UNIMOD:56]K[UNIMOD:56]K[UNIMOD:56]K[UNIMOD:56]IR.T	sp|P62750|RL23A_HUMAN
U87MG_100ug_NHS_Rep1_5Frac_Frac-3_SII_16066_1_16066_4_1	3.81823	4.41421e-05	1.63207e-15	-.[UNIMOD:1]SK[UNIMOD:56]PHSEAGTAFIQTQQLHAAMADTFLEHMC[UNIMOD:4]R.L	sp|P14618|KPYM_HUMAN
U87MG_100ug_NHS_Rep1_5Frac_Frac-3_SII_15898_1_15898_4_1	3.80903	4.41421e-05	1.76513e-15	-.[UNIMOD:1]SK[UNIMOD:56]PHSEAGTAFIQTQQLHAAMADTFLEHMC[UNIMOD:4]R.L	sp|P14618|KPYM_HUMAN
U87MG_100ug_NHS_Rep1_5Frac_Frac-1_SII_15080_1_15080_3_1	3.8031	4.41421e-05	1.85673e-15	R.K[UNIMOD:56]DGNASGTTLLEALDC[UNIMOD:4]ILPPTRPTDK[UNIMOD:56]PLR.L	sp|P68104|EF1A1_HUMAN
U87MG_100ug_NHS_Rep1_5Frac_Frac-5_SII_16055_1_16055_3_1	3.79809	4.41421e-05	1.9377e-15	R.TATESFASDPILYRPVAVALDTK[UNIMOD:56]GPEIR.T	sp|P14618|KPYM_HUMAN
U87MG_100ug_NHS_Rep1_5Frac_Frac-3_SII_15885_1_15885_3_1	3.77926	4.41421e-05	2.27507e-15	R.TATESFASDPILYRPVAVALDTK[UNIMOD:56]GPEIR.T	sp|P14618|KPYM_HUMAN
U87MG_100ug_NHS_Rep1_5Frac_Frac-4_SII_18515_1_18515_3_1	3.77921	4.41421e-05	2.276e-15	R.[UNIMOD:56]ALQASALK[UNIMOD:56]AWGGK[UNIMOD:56]K[UNIMOD:56]ENLK[UNIMOD:56]AAQEEYVK[UNIMOD:56]R.A	sp|P04075|ALDOA_HUMAN
U87MG_100ug_NHS_Rep1_5Frac_Frac-1_SII_15721_1_15721_4_1	3.75602	4.41421e-05	2.77334e-15	-.[UNIMOD:1]SK[UNIMOD:56]PHSEAGTAFIQTQQLHAAMADTFLEHMC[UNIMOD:4]R.L	sp|P14618|KPYM_HUMAN
U87MG_100ug_NHS_Rep1_5Frac_Frac-1_SII_15846_1_15846_4_1	3.74721	4.41421e-05	2.98965e-15	-.[UNIMOD:1]SK[UNIMOD:56]PHSEAGTAFIQTQQLHAAMADTFLEHMC[UNIMOD:4]R.L	sp|P14618|KPYM_HUMAN
U87MG_100ug_NHS_Rep1_5Frac_Frac-3_SII_13882_1_13882_4_1	3.7464	4.41421e-05	3.01017e-15	-.[UNIMOD:1]SK[UNIMOD:56]PHSEAGTAFIQTQQLHAAMADTFLEHM[UNIMOD:35]C[UNIMOD:4]R.L	sp|P14618|KPYM_HUMAN
U87MG_100ug_NHS_Rep1_5Frac_Frac-2_SII_8466_1_8466_3_1	3.72524	4.41421e-05	3.6051e-15	R.AELK[UNIMOD:56]TAMSTPHVAEPAENEQDEQDENGAEASADLR.A	sp|P26038|MOES_HUMAN
U87MG_100ug_NHS_Rep1_5Frac_Frac-1_SII_17574_1_17574_3_1	3.69595	4.41421e-05	4.62762e-15	R.IAEFTTNLTEEEEK[UNIMOD:56]SK[UNIMOD:56]SLAK[UNIMOD:56]LK[UNIMOD:56]NK[UNIMOD:56]HEAMITDLEER.L	sp|P35579|MYH9_HUMAN
U87MG_100ug_NHS_Rep1_5Frac_Frac-4_SII_15425_1_15425_3_1	3.6919	4.41421e-05	4.78997e-15	R.[UNIMOD:56]TTGIVMDSGDGVTHTVPIYEGYALPHAILR.L	sp|P60709|ACTB_HUMAN
U87MG_100ug_NHS_Rep1_5Frac_Frac-1_SII_15546_1_15546_4_1	3.66957	4.41421e-05	5.7939e-15	-.[UNIMOD:1]SK[UNIMOD:56]PHSEAGTAFIQTQQLHAAMADTFLEHMC[UNIMOD:4]R.L	sp|P14618|KPYM_HUMAN
U87MG_100ug_NHS_Rep1_5Frac_Frac-1_SII_17750_1_17750_4_1	3.66841	4.41421e-05	5.85154e-15	-.[UNIMOD:1]APK[UNIMOD:56]AK[UNIMOD:56]K[UNIMOD:56]EAPAPPK[UNIMOD:56]AEAK[UNIMOD:56]AK[UNIMOD:56]ALK[UNIMOD:56]AK[UNIMOD:56]K[UNIMOD:56]AVLK[UNIMOD:56]GVHSHK[UNIMOD:56]K[UNIMOD:56]K[UNIMOD:56]K[UNIMOD:56]IR.T	sp|P62750|RL23A_HUMAN
U87MG_100ug_NHS_Rep1_5Frac_Frac-3_SII_14855_1_14855_3_1	3.66383	4.41421e-05	6.08464e-15	R.TATESFASDPILYRPVAVALDTK[UNIMOD:56]GPEIR.T	sp|P14618|KPYM_HUMAN
U87MG_100ug_NHS_Rep1_5Frac_Frac-1_SII_18405_1_18405_3_1	3.65698	4.41421e-05	6.4504e-15	A.[UNIMOD:27]EFTTNLTEEEEK[UNIMOD:56]SK[UNIMOD:56]SLAK[UNIMOD:56]LK[UNIMOD:56]NK[UNIMOD:56]HEAMITDLEER.L	sp|P35579|MYH9_HUMAN
U87MG_100ug_NHS_Rep1_5Frac_Frac-1_SII_15645_1_15645_3_1	3.65677	4.41421e-05	6.46176e-15	-.[UNIMOD:1]SK[UNIMOD:56]PHSEAGTAFIQTQQLHAAMADTFLEHMC[UNIMOD:4]R.L	sp|P14618|KPYM_HUMAN
U87MG_100ug_NHS_Rep1_5Frac_Frac-3_SII_15532_1_15532_4_1	3.65291	4.41421e-05	6.67816e-15	-.[UNIMOD:1]SK[UNIMOD:56]PHSEAGTAFIQTQQLHAAMADTFLEHMC[UNIMOD:4]R.L	sp|P14618|KPYM_HUMAN
U87MG_100ug_NHS_Rep1_5Frac_Frac-2_SII_18084_1_18084_3_1	3.6527	4.41421e-05	6.69006e-15	-.[UNIMOD:1]MLK[UNIMOD:56]K[UNIMOD:56]FDK[UNIMOD:56]K[UNIMOD:56]DEESGGGSNPFQHLEK[UNIMOD:56]SAVLQEAR.V	sp|Q9Y678|COPG1_HUMAN
U87MG_100ug_NHS_Rep1_5Frac_Frac-5_SII_15640_1_15640_4_1	3.6512	4.41421e-05	6.77608e-15	-.[UNIMOD:1]SK[UNIMOD:56]PHSEAGTAFIQTQQLHAAMADTFLEHMC[UNIMOD:4]R.L	sp|P14618|KPYM_HUMAN
U87MG_100ug_NHS_Rep1_5Frac_Frac-4_SII_16564_1_16564_3_1	3.64327	4.41421e-05	7.24972e-15	-.[UNIMOD:1]AK[UNIMOD:56]EGVEK[UNIMOD:56]AEETEQMIEK[UNIMOD:56]EAGK[UNIMOD:56]EPAEGGGGDGSHR.L	sp|Q9HCJ6|VAT1L_HUMAN
U87MG_100ug_NHS_Rep1_5Frac_Frac-5_SII_16001_1_16001_3_1	3.63991	4.41421e-05	7.4607e-15	R.TATESFASDPILYRPVAVALDTK[UNIMOD:56]GPEIR.T	sp|P14618|KPYM_HUMAN
U87MG_100ug_NHS_Rep1_5Frac_Frac-2_SII_15481_1_15481_4_1	3.63226	4.41421e-05	7.96309e-15	-.[UNIMOD:1]SK[UNIMOD:56]PHSEAGTAFIQTQQLHAAMADTFLEHMC[UNIMOD:4]R.L	sp|P14618|KPYM_HUMAN
U87MG_100ug_NHS_Rep1_5Frac_Frac-2_SII_15526_1_15526_3_1	3.62269	4.41421e-05	8.63966e-15	-.[UNIMOD:1]SK[UNIMOD:56]PHSEAGTAFIQTQQLHAAMADTFLEHMC[UNIMOD:4]R.L	sp|P14618|KPYM_HUMAN
U87MG_100ug_NHS_Rep1_5Frac_Frac-5_SII_14509_1_14509_3_1	3.61995	4.41421e-05	8.84347e-15	R.VK[UNIMOD:56]DTDDVPMILVGNK[UNIMOD:56]C[UNIMOD:4]DLEDERVVGK[UNIMOD:56]EQGQNLAR.Q	sp|A6NIZ1|RP1BL_HUMAN
U87MG_100ug_NHS_Rep1_5Frac_Frac-5_SII_14583_1_14583_3_1	3.61228	4.41421e-05	9.44145e-15	R.[UNIMOD:56]HYGGLTGLNK[UNIMOD:56]AETAAK[UNIMOD:56]HGEAQVK[UNIMOD:56]IWR.R	sp|P18669|PGAM1_HUMAN
U87MG_100ug_NHS_Rep1_5Frac_Frac-1_SII_15799_1_15799_4_1	3.59421	4.41421e-05	1.10133e-14	-.[UNIMOD:1]SK[UNIMOD:56]PHSEAGTAFIQTQQLHAAMADTFLEHMC[UNIMOD:4]R.L	sp|P14618|KPYM_HUMAN
U87MG_100ug_NHS_Rep1_5Frac_Frac-2_SII_18769_1_18769_3_1	3.57452	4.41421e-05	1.30259e-14	R.K[UNIMOD:56]DGNASGTTLLEALDC[UNIMOD:4]ILPPTRPTDK[UNIMOD:56]PLR.L	sp|P68104|EF1A1_HUMAN
U87MG_100ug_NHS_Rep1_5Frac_Frac-1_SII_15622_1_15622_3_1	3.57347	4.41421e-05	1.31428e-14	-.[UNIMOD:1]SK[UNIMOD:56]PHSEAGTAFIQTQQLHAAMADTFLEHMC[UNIMOD:4]R.L	sp|P14618|KPYM_HUMAN
U87MG_100ug_NHS_Rep1_5Frac_Frac-3_SII_18891_1_18891_3_1	3.57172	4.41421e-05	1.33402e-14	R.K[UNIMOD:56]DGNASGTTLLEALDC[UNIMOD:4]ILPPTRPTDK[UNIMOD:56]PLR.L	sp|P68104|EF1A1_HUMAN
U87MG_100ug_NHS_Rep1_5Frac_Frac-1_SII_12700_1_12700_3_1	3.5691	4.41421e-05	1.36412e-14	R.VEDVLGK[UNIMOD:56]GWENHVEGQK[UNIMOD:56]LK[UNIMOD:56]QDGDSFR.M	sp|Q14204|DYHC1_HUMAN
U87MG_100ug_NHS_Rep1_5Frac_Frac-3_SII_14208_1_14208_3_1	3.56694	4.41421e-05	1.38948e-14	R.NTTIPTK[UNIMOD:56]QTQTFTTYSDNQPGVLIQVYEGER.A	sp|P11142|HSP7C_HUMAN
U87MG_100ug_NHS_Rep1_5Frac_Frac-1_SII_17503_1_17503_3_1	3.56261	4.41421e-05	1.44173e-14	R.IAEFTTNLTEEEEK[UNIMOD:56]SK[UNIMOD:56]SLAK[UNIMOD:56]LK[UNIMOD:56]NK[UNIMOD:56]HEAMITDLEER.L	sp|P35579|MYH9_HUMAN
U87MG_100ug_NHS_Rep1_5Frac_Frac-5_SII_16946_1_16946_3_1	3.56079	4.41421e-05	1.46425e-14	R.K[UNIMOD:56]K[UNIMOD:56]AK[UNIMOD:56]VDEFPLC[UNIMOD:4]GHMVSDEYEQLSSEALEAAR.I	sp|P27635|RL10_HUMAN
U87MG_100ug_NHS_Rep1_5Frac_Frac-2_SII_15528_1_15528_3_1	3.56022	4.41421e-05	1.47134e-14	R.[UNIMOD:56]DNSTMGYMAAK[UNIMOD:56]K[UNIMOD:56]HLEINPDHSIIETLR.Q	sp|P07900|HS90A_HUMAN
U87MG_100ug_NHS_Rep1_5Frac_Frac-4_SII_10911_1_10911_2_1	3.55693	4.41421e-05	1.51321e-14	R.FHVEEEGK[UNIMOD:56]GK[UNIMOD:56]DASGNK[UNIMOD:56]VK[UNIMOD:56]AEPAK[UNIMOD:56]IEAFR.A	sp|P00558|PGK1_HUMAN
U87MG_100ug_NHS_Rep1_5Frac_Frac-5_SII_13604_1_13604_3_1	3.54872	4.41421e-05	1.62289e-14	R.MAADDVEEYMIERPEPEFQDLNEK[UNIMOD:56]AR.A	sp|Q9BUL8|PDC10_HUMAN
U87MG_100ug_NHS_Rep1_5Frac_Frac-2_SII_15602_1_15602_3_1	3.54262	4.41421e-05	1.70955e-14	R.[UNIMOD:56]DNSTMGYMMAK[UNIMOD:56]K[UNIMOD:56]HLEINPDHPIVETLR.Q	sp|P08238|HS90B_HUMAN
U87MG_100ug_NHS_Rep1_5Frac_Frac-3_SII_15642_1_15642_4_1	3.54261	4.41421e-05	1.7097e-14	-.[UNIMOD:1]SK[UNIMOD:56]PHSEAGTAFIQTQQLHAAMADTFLEHMC[UNIMOD:4]R.L	sp|P14618|KPYM_HUMAN
U87MG_100ug_NHS_Rep1_5Frac_Frac-2_SII_15569_1_15569_4_1	3.53579	4.41421e-05	1.81187e-14	-.[UNIMOD:1]SK[UNIMOD:56]PHSEAGTAFIQTQQLHAAMADTFLEHMC[UNIMOD:4]R.L	sp|P14618|KPYM_HUMAN
U87MG_100ug_NHS_Rep1_5Frac_Frac-5_SII_17805_1_17805_4_1	3.53486	4.41421e-05	1.82636e-14	-.[UNIMOD:1]APK[UNIMOD:56]AK[UNIMOD:56]K[UNIMOD:56]EAPAPPK[UNIMOD:56]AEAK[UNIMOD:56]AK[UNIMOD:56]ALK[UNIMOD:56]AK[UNIMOD:56]K[UNIMOD:56]AVLK[UNIMOD:56]GVHSHK[UNIMOD:56]K[UNIMOD:56]K[UNIMOD:56]K[UNIMOD:56]IR.T	sp|P62750|RL23A_HUMAN
U87MG_100ug_NHS_Rep1_5Frac_Frac-3_SII_15719_1_15719_4_1	3.53366	4.41421e-05	1.84515e-14	-.[UNIMOD:1]SK[UNIMOD:56]PHSEAGTAFIQTQQLHAAMADTFLEHMC[UNIMOD:4]R.L	sp|P14618|KPYM_HUMAN
U87MG_100ug_NHS_Rep1_5Frac_Frac-5_SII_16933_1_16933_3_1	3.52192	4.41421e-05	2.03922e-14	R.K[UNIMOD:56]K[UNIMOD:56]AK[UNIMOD:56]VDEFPLC[UNIMOD:4]GHMVSDEYEQLSSEALEAAR.I	sp|P27635|RL10_HUMAN
U87MG_100ug_NHS_Rep1_5Frac_Frac-2_SII_15590_1_15590_4_1	3.51858	4.41421e-05	2.09814e-14	-.[UNIMOD:1]SK[UNIMOD:56]PHSEAGTAFIQTQQLHAAMADTFLEHMC[UNIMOD:4]R.L	sp|P14618|KPYM_HUMAN
U87MG_100ug_NHS_Rep1_5Frac_Frac-3_SII_15785_1_15785_4_1	3.50773	4.41421e-05	2.30138e-14	-.[UNIMOD:1]SK[UNIMOD:56]PHSEAGTAFIQTQQLHAAMADTFLEHMC[UNIMOD:4]R.L	sp|P14618|KPYM_HUMAN
U87MG_100ug_NHS_Rep1_5Frac_Frac-1_SII_18768_1_18768_3_1	3.48569	4.41421e-05	2.777e-14	R.K[UNIMOD:56]DGNASGTTLLEALDC[UNIMOD:4]ILPPTRPTDK[UNIMOD:56]PLR.L	sp|P68104|EF1A1_HUMAN
U87MG_100ug_NHS_Rep1_5Frac_Frac-1_SII_15655_1_15655_4_1	3.48224	4.41421e-05	2.85987e-14	-.[UNIMOD:1]SK[UNIMOD:56]PHSEAGTAFIQTQQLHAAMADTFLEHMC[UNIMOD:4]R.L	sp|P14618|KPYM_HUMAN
U87MG_100ug_NHS_Rep1_5Frac_Frac-5_SII_23036_1_23036_3_1	3.47905	4.41421e-05	2.9386e-14	R.[UNIMOD:56]ILGGVISAISEAAAQYNPEPPPPR.T	sp|P04632|CPNS1_HUMAN
U87MG_100ug_NHS_Rep1_5Frac_Frac-1_SII_18746_1_18746_3_1	3.47512	4.41421e-05	3.03873e-14	R.K[UNIMOD:56]DGNASGTTLLEALDC[UNIMOD:4]ILPPTRPTDK[UNIMOD:56]PLR.L	sp|P68104|EF1A1_HUMAN
U87MG_100ug_NHS_Rep1_5Frac_Frac-2_SII_15849_1_15849_3_1	3.47089	4.41421e-05	3.15034e-14	R.TATESFASDPILYRPVAVALDTK[UNIMOD:56]GPEIR.T	sp|P14618|KPYM_HUMAN
U87MG_100ug_NHS_Rep1_5Frac_Frac-4_SII_18704_1_18704_3_1	3.46901	4.41421e-05	3.20119e-14	R.K[UNIMOD:56]DGNASGTTLLEALDC[UNIMOD:4]ILPPTRPTDK[UNIMOD:56]PLR.L	sp|P68104|EF1A1_HUMAN
U87MG_100ug_NHS_Rep1_5Frac_Frac-1_SII_18878_1_18878_3_1	3.45749	4.41421e-05	3.53148e-14	R.K[UNIMOD:56]DGNASGTTLLEALDC[UNIMOD:4]ILPPTRPTDK[UNIMOD:56]PLR.L	sp|P68104|EF1A1_HUMAN
U87MG_100ug_NHS_Rep1_5Frac_Frac-3_SII_16415_1_16415_4_1	3.45545	4.41421e-05	3.59336e-14	-.[UNIMOD:1]SK[UNIMOD:56]PHSEAGTAFIQTQQLHAAMADTFLEHMC[UNIMOD:4]R.L	sp|P14618|KPYM_HUMAN
U87MG_100ug_NHS_Rep1_5Frac_Frac-2_SII_15516_1_15516_3_1	3.45019	4.41421e-05	3.75808e-14	-.[UNIMOD:1]SK[UNIMOD:56]PHSEAGTAFIQTQQLHAAMADTFLEHMC[UNIMOD:4]R.L	sp|P14618|KPYM_HUMAN
U87MG_100ug_NHS_Rep1_5Frac_Frac-1_SII_14909_1_14909_3_1	3.43993	4.41421e-05	4.10152e-14	R.K[UNIMOD:56]DGNASGTTLLEALDC[UNIMOD:4]ILPPTRPTDK[UNIMOD:56]PLR.L	sp|P68104|EF1A1_HUMAN
U87MG_100ug_NHS_Rep1_5Frac_Frac-4_SII_13994_1_13994_3_1	3.4383	4.41421e-05	4.15885e-14	R.YASIC[UNIMOD:4]QQNGIVPIVEPEILPDGDHDLK[UNIMOD:56]R.C	sp|P09972|ALDOC_HUMAN
U87MG_100ug_NHS_Rep1_5Frac_Frac-5_SII_15079_1_15079_3_1	3.4335	4.41421e-05	4.33253e-14	R.THFGGGK[UNIMOD:56]TTGFGMIYDSLDYAK[UNIMOD:56]K[UNIMOD:56]NEPK[UNIMOD:56]HR.L	sp|P62847|RS24_HUMAN
U87MG_100ug_NHS_Rep1_5Frac_Frac-1_SII_14888_1_14888_3_1	3.42121	4.41421e-05	4.81106e-14	R.K[UNIMOD:56]DGNASGTTLLEALDC[UNIMOD:4]ILPPTRPTDK[UNIMOD:56]PLR.L	sp|P68104|EF1A1_HUMAN
U87MG_100ug_NHS_Rep1_5Frac_Frac-2_SII_18057_1_18057_3_1	3.41978	4.41421e-05	4.86998e-14	-.[UNIMOD:1]MLK[UNIMOD:56]K[UNIMOD:56]FDK[UNIMOD:56]K[UNIMOD:56]DEESGGGSNPFQHLEK[UNIMOD:56]SAVLQEAR.V	sp|Q9Y678|COPG1_HUMAN
U87MG_100ug_NHS_Rep1_5Frac_Frac-3_SII_18713_1_18713_3_1	3.4182	4.41421e-05	4.93606e-14	R.K[UNIMOD:56]DGNASGTTLLEALDC[UNIMOD:4]ILPPTRPTDK[UNIMOD:56]PLR.L	sp|P68104|EF1A1_HUMAN
U87MG_100ug_NHS_Rep1_5Frac_Frac-3_SII_15922_1_15922_4_1	3.41741	4.41421e-05	4.96952e-14	-.[UNIMOD:1]SK[UNIMOD:56]PHSEAGTAFIQTQQLHAAMADTFLEHMC[UNIMOD:4]R.L	sp|P14618|KPYM_HUMAN
U87MG_100ug_NHS_Rep1_5Frac_Frac-1_SII_15934_1_15934_3_1	3.40484	4.41421e-05	5.53153e-14	R.TATESFASDPILYRPVAVALDTK[UNIMOD:56]GPEIR.T	sp|P14618|KPYM_HUMAN
U87MG_100ug_NHS_Rep1_5Frac_Frac-1_SII_16038_1_16038_4_1	3.39914	4.41421e-05	5.80674e-14	-.[UNIMOD:1]SK[UNIMOD:56]PHSEAGTAFIQTQQLHAAMADTFLEHMC[UNIMOD:4]R.L	sp|P14618|KPYM_HUMAN
U87MG_100ug_NHS_Rep1_5Frac_Frac-4_SII_18548_1_18548_3_1	3.39855	4.41421e-05	5.83615e-14	R.K[UNIMOD:56]DGNASGTTLLEALDC[UNIMOD:4]ILPPTRPTDK[UNIMOD:56]PLR.L	sp|P68104|EF1A1_HUMAN
U87MG_100ug_NHS_Rep1_5Frac_Frac-4_SII_14507_1_14507_3_1	3.39812	4.41421e-05	5.85744e-14	R.[UNIMOD:56]TTGIVM[UNIMOD:35]DSGDGVTHTVPIYEGYALPHAILR.L	sp|P60709|ACTB_HUMAN
U87MG_100ug_NHS_Rep1_5Frac_Frac-1_SII_15073_1_15073_3_1	3.39797	4.41421e-05	5.86478e-14	R.TEMEDLMSSK[UNIMOD:56]DDVGK[UNIMOD:56]SVHELEK[UNIMOD:56]SK[UNIMOD:56]R.A	sp|P35579|MYH9_HUMAN
U87MG_100ug_NHS_Rep1_5Frac_Frac-1_SII_15537_1_15537_4_1	3.39308	4.41421e-05	6.11463e-14	-.[UNIMOD:1]SK[UNIMOD:56]PHSEAGTAFIQTQQLHAAMADTFLEHMC[UNIMOD:4]R.L	sp|P14618|KPYM_HUMAN
U87MG_100ug_NHS_Rep1_5Frac_Frac-5_SII_14493_1_14493_3_1	3.38954	4.41421e-05	6.3016e-14	R.VK[UNIMOD:56]DTDDVPMILVGNK[UNIMOD:56]C[UNIMOD:4]DLEDERVVGK[UNIMOD:56]EQGQNLAR.Q	sp|A6NIZ1|RP1BL_HUMAN
U87MG_100ug_NHS_Rep1_5Frac_Frac-3_SII_15988_1_15988_4_1	3.37619	4.41421e-05	7.06132e-14	-.[UNIMOD:1]SK[UNIMOD:56]PHSEAGTAFIQTQQLHAAMADTFLEHMC[UNIMOD:4]R.L	sp|P14618|KPYM_HUMAN
U87MG_100ug_NHS_Rep1_5Frac_Frac-3_SII_15646_1_15646_3_1	3.37114	4.41421e-05	7.37136e-14	R.[UNIMOD:56]TTGIVMDSGDGVTHTVPIYEGYALPHAILR.L	sp|P60709|ACTB_HUMAN
U87MG_100ug_NHS_Rep1_5Frac_Frac-2_SII_15537_1_15537_3_1	3.3483	4.41421e-05	8.9561e-14	-.[UNIMOD:1]SK[UNIMOD:56]PHSEAGTAFIQTQQLHAAMADTFLEHMC[UNIMOD:4]R.L	sp|P14618|KPYM_HUMAN
U87MG_100ug_NHS_Rep1_5Frac_Frac-5_SII_15635_1_15635_3_1	3.34423	4.41421e-05	9.27168e-14	R.VISSIEQK[UNIMOD:56]TDTSDK[UNIMOD:56]K[UNIMOD:56]LQLIK[UNIMOD:56]DYR.E	sp|P27348|1433T_HUMAN
U87MG_100ug_NHS_Rep1_5Frac_Frac-1_SII_14880_1_14880_3_1	3.34299	4.41421e-05	9.37021e-14	R.K[UNIMOD:56]DGNASGTTLLEALDC[UNIMOD:4]ILPPTRPTDK[UNIMOD:56]PLR.L	sp|P68104|EF1A1_HUMAN
U87MG_100ug_NHS_Rep1_5Frac_Frac-2_SII_9733_1_9733_3_1	3.34181	4.41421e-05	9.46511e-14	-.[UNIMOD:56]PEPTK[UNIMOD:56]SAPAPK[UNIMOD:56]K[UNIMOD:56]GSK[UNIMOD:56]K[UNIMOD:56]AVTK[UNIMOD:56]AQK[UNIMOD:56]K[UNIMOD:56]DGK[UNIMOD:56]K[UNIMOD:56]R.K	sp|P58876|H2B1D_HUMAN
U87MG_100ug_NHS_Rep1_5Frac_Frac-1_SII_15611_1_15611_4_1	3.33489	4.41421e-05	1.00399e-13	-.[UNIMOD:1]SK[UNIMOD:56]PHSEAGTAFIQTQQLHAAMADTFLEHMC[UNIMOD:4]R.L	sp|P14618|KPYM_HUMAN
U87MG_100ug_NHS_Rep1_5Frac_Frac-1_SII_12242_1_12242_3_1	3.33251	4.41421e-05	1.0246e-13	R.GPGLEK[UNIMOD:56]TGVAVNK[UNIMOD:56]PAEFTVDAK[UNIMOD:56]HGGK[UNIMOD:56]APLR.V	sp|P21333|FLNA_HUMAN
U87MG_100ug_NHS_Rep1_5Frac_Frac-2_SII_15506_1_15506_3_1	3.32862	4.41421e-05	1.05916e-13	-.[UNIMOD:1]SK[UNIMOD:56]PHSEAGTAFIQTQQLHAAMADTFLEHMC[UNIMOD:4]R.L	sp|P14618|KPYM_HUMAN
U87MG_100ug_NHS_Rep1_5Frac_Frac-5_SII_17207_1_17207_3_1	3.32267	4.41421e-05	1.11425e-13	-.[UNIMOD:1]SIGVPIK[UNIMOD:56]VLHEAEGHIVTC[UNIMOD:4]ETNTGEVYR.G	sp|P62318|SMD3_HUMAN
U87MG_100ug_NHS_Rep1_5Frac_Frac-4_SII_14021_1_14021_3_1	3.32106	4.41421e-05	1.12964e-13	-.[UNIMOD:1]VSVINTVDTSHEDMIHDAQMDYYGTR.L	sp|P55735|SEC13_HUMAN
U87MG_100ug_NHS_Rep1_5Frac_Frac-1_SII_16492_1_16492_3_1	3.31664	4.41421e-05	1.17296e-13	R.[UNIMOD:56]TATESFASDPILYRPVAVALDTK[UNIMOD:56]GPEIR.T	sp|P14618|KPYM_HUMAN
U87MG_100ug_NHS_Rep1_5Frac_Frac-1_SII_18669_1_18669_3_1	3.31573	4.41421e-05	1.18213e-13	R.K[UNIMOD:56]DGNASGTTLLEALDC[UNIMOD:4]ILPPTRPTDK[UNIMOD:56]PLR.L	sp|P68104|EF1A1_HUMAN
U87MG_100ug_NHS_Rep1_5Frac_Frac-1_SII_15139_1_15139_3_1	3.31234	4.41421e-05	1.21672e-13	R.TEMEDLMSSK[UNIMOD:56]DDVGK[UNIMOD:56]SVHELEK[UNIMOD:56]SK[UNIMOD:56]R.A	sp|P35579|MYH9_HUMAN
U87MG_100ug_NHS_Rep1_5Frac_Frac-2_SII_20419_1_20419_3_1	3.31206	4.41421e-05	1.21966e-13	R.[UNIMOD:28]QK[UNIMOD:56]DYETATLSEIK[UNIMOD:56]ALLK[UNIMOD:56]K[UNIMOD:56]HEAFESDLAAHQDR.V	sp|P12814|ACTN1_HUMAN
U87MG_100ug_NHS_Rep1_5Frac_Frac-1_SII_17030_1_17030_3_1	3.2997	4.41421e-05	1.35511e-13	M.[UNIMOD:56]PATEK[UNIMOD:56]DLAEDAPWK[UNIMOD:56]K[UNIMOD:56]IQQNTFTR.W	sp|P21333|FLNA_HUMAN
U87MG_100ug_NHS_Rep1_5Frac_Frac-3_SII_16034_1_16034_4_1	3.28928	4.41421e-05	1.481e-13	-.[UNIMOD:1]SK[UNIMOD:56]PHSEAGTAFIQTQQLHAAMADTFLEHMC[UNIMOD:4]R.L	sp|P14618|KPYM_HUMAN
U87MG_100ug_NHS_Rep1_5Frac_Frac-5_SII_20998_1_20998_3_1	3.28837	4.41421e-05	1.49249e-13	-.[UNIMOD:1]SEK[UNIMOD:56]SVEAAAELSAK[UNIMOD:56]DLK[UNIMOD:56]EK[UNIMOD:56]K[UNIMOD:56]EK[UNIMOD:56]VEEK[UNIMOD:56]ASR.K	sp|P20962|PTMS_HUMAN
U87MG_100ug_NHS_Rep1_5Frac_Frac-1_SII_15680_1_15680_3_1	3.28291	4.41421e-05	1.56366e-13	-.[UNIMOD:1]SK[UNIMOD:56]PHSEAGTAFIQTQQLHAAMADTFLEHMC[UNIMOD:4]R.L	sp|P14618|KPYM_HUMAN
U87MG_100ug_NHS_Rep1_5Frac_Frac-1_SII_8710_1_8710_3_1	3.27647	4.41421e-05	1.6518e-13	R.AELK[UNIMOD:56]TAMSTPHVAEPAENEQDEQDENGAEASADLR.A	sp|P26038|MOES_HUMAN
U87MG_100ug_NHS_Rep1_5Frac_Frac-1_SII_23116_1_23116_3_1	3.27562	4.41421e-05	1.66391e-13	R.K[UNIMOD:56]LEGDSTDLSDQIAELQAQIAELK[UNIMOD:56]MQLAK[UNIMOD:56]K[UNIMOD:56]EEELQAALAR.V	sp|P35579|MYH9_HUMAN
U87MG_100ug_NHS_Rep1_5Frac_Frac-1_SII_17536_1_17536_4_1	3.26938	4.41421e-05	1.75468e-13	R.IAEFTTNLTEEEEK[UNIMOD:56]SK[UNIMOD:56]SLAK[UNIMOD:56]LK[UNIMOD:56]NK[UNIMOD:56]HEAMITDLEER.L	sp|P35579|MYH9_HUMAN
U87MG_100ug_NHS_Rep1_5Frac_Frac-2_SII_15547_1_15547_3_1	3.2677	4.41421e-05	1.78011e-13	-.[UNIMOD:1]SK[UNIMOD:56]PHSEAGTAFIQTQQLHAAMADTFLEHMC[UNIMOD:4]R.L	sp|P14618|KPYM_HUMAN
U87MG_100ug_NHS_Rep1_5Frac_Frac-1_SII_16119_1_16119_3_1	3.26696	4.41421e-05	1.79126e-13	R.TATESFASDPILYRPVAVALDTK[UNIMOD:56]GPEIR.T	sp|P14618|KPYM_HUMAN
U87MG_100ug_NHS_Rep1_5Frac_Frac-5_SII_14320_1_14320_3_1	3.26547	4.41421e-05	1.81413e-13	R.AQK[UNIMOD:56]DEEK[UNIMOD:56]MEIQEIQLK[UNIMOD:56]EAK[UNIMOD:56]HIAEDADR.K	sp|P09493|TPM1_HUMAN
U87MG_100ug_NHS_Rep1_5Frac_Frac-1_SII_16110_1_16110_4_1	3.26391	4.41421e-05	1.83845e-13	-.[UNIMOD:1]SK[UNIMOD:56]PHSEAGTAFIQTQQLHAAMADTFLEHMC[UNIMOD:4]R.L	sp|P14618|KPYM_HUMAN
U87MG_100ug_NHS_Rep1_5Frac_Frac-4_SII_8936_1_8936_2_1	3.26306	4.41421e-05	1.85189e-13	R.[UNIMOD:56]HQGVMVGMGQK[UNIMOD:56]DSYVGDEAQSK[UNIMOD:56]R.G	sp|P60709|ACTB_HUMAN
U87MG_100ug_NHS_Rep1_5Frac_Frac-5_SII_15676_1_15676_4_1	3.26005	4.41421e-05	1.90005e-13	-.[UNIMOD:1]SK[UNIMOD:56]PHSEAGTAFIQTQQLHAAMADTFLEHMC[UNIMOD:4]R.L	sp|P14618|KPYM_HUMAN
U87MG_100ug_NHS_Rep1_5Frac_Frac-5_SII_15052_1_15052_3_1	3.25885	4.41421e-05	1.91944e-13	R.AMK[UNIMOD:56]DEEK[UNIMOD:56]MEIQEMQLK[UNIMOD:56]EAK[UNIMOD:56]HIAEEADR.K	sp|P67936|TPM4_HUMAN
U87MG_100ug_NHS_Rep1_5Frac_Frac-2_SII_9255_1_9255_3_1	3.25859	4.41421e-05	1.9238e-13	R.LQAALDDEEAGGRPAMEPGNGSLDLGGDSAGR.S	sp|Q00839|HNRPU_HUMAN
U87MG_100ug_NHS_Rep1_5Frac_Frac-3_SII_21321_1_21321_3_1	3.25842	4.41421e-05	1.92661e-13	R.QQYESVAAK[UNIMOD:56]NLQEAEEWYK[UNIMOD:56]SK[UNIMOD:56]FADLSEAANR.N	sp|P08670|VIME_HUMAN
U87MG_100ug_NHS_Rep1_5Frac_Frac-2_SII_18671_1_18671_3_1	3.25009	4.41421e-05	2.06822e-13	R.K[UNIMOD:56]DGNASGTTLLEALDC[UNIMOD:4]ILPPTRPTDK[UNIMOD:56]PLR.L	sp|P68104|EF1A1_HUMAN
U87MG_100ug_NHS_Rep1_5Frac_Frac-2_SII_15515_1_15515_3_1	3.2463	4.41421e-05	2.13624e-13	R.[UNIMOD:56]DNSTMGYMAAK[UNIMOD:56]K[UNIMOD:56]HLEINPDHSIIETLR.Q	sp|P07900|HS90A_HUMAN
U87MG_100ug_NHS_Rep1_5Frac_Frac-2_SII_15496_1_15496_3_1	3.23774	4.41421e-05	2.29787e-13	-.[UNIMOD:1]SK[UNIMOD:56]PHSEAGTAFIQTQQLHAAMADTFLEHMC[UNIMOD:4]R.L	sp|P14618|KPYM_HUMAN
U87MG_100ug_NHS_Rep1_5Frac_Frac-1_SII_14316_1_14316_3_1	3.23383	4.41421e-05	2.37565e-13	-.[UNIMOD:1]VSVINTVDTSHEDMIHDAQMDYYGTR.L	sp|P55735|SEC13_HUMAN
U87MG_100ug_NHS_Rep1_5Frac_Frac-3_SII_15954_1_15954_4_1	3.23382	4.41421e-05	2.37595e-13	-.[UNIMOD:1]SK[UNIMOD:56]PHSEAGTAFIQTQQLHAAMADTFLEHMC[UNIMOD:4]R.L	sp|P14618|KPYM_HUMAN
U87MG_100ug_NHS_Rep1_5Frac_Frac-4_SII_11190_1_11190_3_1	3.22574	4.41421e-05	2.54538e-13	R.FHVEEEGK[UNIMOD:56]GK[UNIMOD:56]DASGNK[UNIMOD:56]VK[UNIMOD:56]AEPAK[UNIMOD:56]IEAFR.A	sp|P00558|PGK1_HUMAN
U87MG_100ug_NHS_Rep1_5Frac_Frac-3_SII_15820_1_15820_4_1	3.22459	4.41421e-05	2.57034e-13	-.[UNIMOD:1]SK[UNIMOD:56]PHSEAGTAFIQTQQLHAAMADTFLEHMC[UNIMOD:4]R.L	sp|P14618|KPYM_HUMAN
U87MG_100ug_NHS_Rep1_5Frac_Frac-5_SII_15828_1_15828_3_1	3.21817	4.41421e-05	2.71493e-13	R.VSLDVNHFAPDELTVK[UNIMOD:56]TK[UNIMOD:56]DGVVEITGK[UNIMOD:56]HEER.Q	sp|P04792|HSPB1_HUMAN
U87MG_100ug_NHS_Rep1_5Frac_Frac-1_SII_8457_1_8457_3_1	3.218	4.41421e-05	2.71895e-13	D.PAK[UNIMOD:56]SAPAPK[UNIMOD:56]K[UNIMOD:56]GSK[UNIMOD:56]K[UNIMOD:56]AVTK[UNIMOD:56]AQK[UNIMOD:56]K[UNIMOD:56]DGK[UNIMOD:56]K[UNIMOD:56]R.K	sp|P62807|H2B1C_HUMAN
U87MG_100ug_NHS_Rep1_5Frac_Frac-3_SII_20430_1_20430_3_1	3.21711	4.41421e-05	2.73949e-13	-.[UNIMOD:1]ATPGNLGSSVLASK[UNIMOD:56]TK[UNIMOD:56]TK[UNIMOD:56]K[UNIMOD:56]K[UNIMOD:56]HFVAQK[UNIMOD:56]VK[UNIMOD:56]LFR.A	sp|P48426|PI42A_HUMAN
U87MG_100ug_NHS_Rep1_5Frac_Frac-4_SII_10898_1_10898_3_1	3.21462	4.41421e-05	2.79824e-13	-.[UNIMOD:56]PDPAK[UNIMOD:56]SAPAPK[UNIMOD:56]K[UNIMOD:56]GSK[UNIMOD:56]K[UNIMOD:56]AVTK[UNIMOD:56]VQK[UNIMOD:56]K[UNIMOD:56]DGK[UNIMOD:56]K[UNIMOD:56]R.K	sp|Q5QNW6|H2B2F_HUMAN
U87MG_100ug_NHS_Rep1_5Frac_Frac-5_SII_21925_1_21925_3_1	3.19916	4.41421e-05	3.19251e-13	-.[UNIMOD:56]MK[UNIMOD:56]PLVVFVLGGPGAGK[UNIMOD:56]GTQC[UNIMOD:4]AR.I	sp|P30085|KCY_HUMAN
U87MG_100ug_NHS_Rep1_5Frac_Frac-3_SII_16287_1_16287_4_1	3.19334	4.41421e-05	3.35462e-13	-.[UNIMOD:1]SK[UNIMOD:56]PHSEAGTAFIQTQQLHAAMADTFLEHMC[UNIMOD:4]R.L	sp|P14618|KPYM_HUMAN
U87MG_100ug_NHS_Rep1_5Frac_Frac-1_SII_18615_1_18615_3_1	3.18703	4.41421e-05	3.54021e-13	R.K[UNIMOD:56]DGNASGTTLLEALDC[UNIMOD:4]ILPPTRPTDK[UNIMOD:56]PLR.L	sp|P68104|EF1A1_HUMAN
U87MG_100ug_NHS_Rep1_5Frac_Frac-3_SII_12806_1_12806_3_1	3.18413	4.41421e-05	3.62865e-13	-.[UNIMOD:1]METEQPEETFPNTETNGEFGK[UNIMOD:56]RPAEDMEEEQAFK[UNIMOD:56]R.S	sp|P61978|HNRPK_HUMAN
U87MG_100ug_NHS_Rep1_5Frac_Frac-5_SII_22952_1_22952_2_1	3.16214	4.41421e-05	4.37682e-13	-.[UNIMOD:1]AEEGIAAGGVMDVNTALQEVLK[UNIMOD:56]TALIHDGLAR.G	sp|P25398|RS12_HUMAN
U87MG_100ug_NHS_Rep1_5Frac_Frac-3_SII_16403_1_16403_3_1	3.16151	4.41421e-05	4.40035e-13	R.[UNIMOD:56]TATESFASDPILYRPVAVALDTK[UNIMOD:56]GPEIR.T	sp|P14618|KPYM_HUMAN
U87MG_100ug_NHS_Rep1_5Frac_Frac-3_SII_11287_1_11287_3_1	3.15877	4.41421e-05	4.50426e-13	R.FHVEEEGK[UNIMOD:56]GK[UNIMOD:56]DASGNK[UNIMOD:56]VK[UNIMOD:56]AEPAK[UNIMOD:56]IEAFR.A	sp|P00558|PGK1_HUMAN
U87MG_100ug_NHS_Rep1_5Frac_Frac-5_SII_13645_1_13645_3_1	3.14424	4.41421e-05	5.09808e-13	R.MAADDVEEYMIERPEPEFQDLNEK[UNIMOD:56]AR.A	sp|Q9BUL8|PDC10_HUMAN
U87MG_100ug_NHS_Rep1_5Frac_Frac-1_SII_15692_1_15692_3_1	3.13783	4.41421e-05	5.38431e-13	R.[UNIMOD:56]TTGIVMDSGDGVTHTVPIYEGYALPHAILR.L	sp|P60709|ACTB_HUMAN
U87MG_100ug_NHS_Rep1_5Frac_Frac-1_SII_14943_1_14943_3_1	3.13522	4.41421e-05	5.50552e-13	R.K[UNIMOD:56]DGNASGTTLLEALDC[UNIMOD:4]ILPPTRPTDK[UNIMOD:56]PLR.L	sp|P68104|EF1A1_HUMAN
U87MG_100ug_NHS_Rep1_5Frac_Frac-4_SII_18614_1_18614_3_1	3.1323	4.41421e-05	5.64391e-13	R.K[UNIMOD:56]DGNASGTTLLEALDC[UNIMOD:4]ILPPTRPTDK[UNIMOD:56]PLR.L	sp|P68104|EF1A1_HUMAN
U87MG_100ug_NHS_Rep1_5Frac_Frac-3_SII_21688_1_21688_3_1	3.12922	4.41421e-05	5.79438e-13	R.[UNIMOD:56]SGVSLAALK[UNIMOD:56]K[UNIMOD:56]ALAAAGYDVEK[UNIMOD:56]NNSR.I	sp|P16403|H12_HUMAN
U87MG_100ug_NHS_Rep1_5Frac_Frac-3_SII_16273_1_16273_4_1	3.12825	4.41421e-05	5.84229e-13	-.[UNIMOD:1]SK[UNIMOD:56]PHSEAGTAFIQTQQLHAAMADTFLEHMC[UNIMOD:4]R.L	sp|P14618|KPYM_HUMAN
U87MG_100ug_NHS_Rep1_5Frac_Frac-5_SII_7167_1_7167_3_1	3.12503	4.41421e-05	6.00496e-13	R.VVSSIEQK[UNIMOD:56]TEGAEK[UNIMOD:56]K[UNIMOD:56]QQM[UNIMOD:35]AR.E	sp|P63104|1433Z_HUMAN
U87MG_100ug_NHS_Rep1_5Frac_Frac-2_SII_15565_1_15565_3_1	3.12267	4.41421e-05	6.12672e-13	-.[UNIMOD:1]SK[UNIMOD:56]PHSEAGTAFIQTQQLHAAMADTFLEHMC[UNIMOD:4]R.L	sp|P14618|KPYM_HUMAN
U87MG_100ug_NHS_Rep1_5Frac_Frac-1_SII_22213_1_22213_3_1	3.12222	4.41421e-05	6.15011e-13	R.[UNIMOD:56]LLEMNLMHAPQVADAILGNQMFTHYDR.A	sp|Q00610|CLH1_HUMAN
U87MG_100ug_NHS_Rep1_5Frac_Frac-5_SII_10706_1_10706_3_1	3.11307	4.41421e-05	6.64906e-13	-.[UNIMOD:56]PEPAK[UNIMOD:56]SAPAPK[UNIMOD:56]K[UNIMOD:56]GSK[UNIMOD:56]K[UNIMOD:56]AVTK[UNIMOD:56]AQK[UNIMOD:56]K[UNIMOD:56]DGK[UNIMOD:56]K[UNIMOD:56]R.K	sp|P62807|H2B1C_HUMAN
U87MG_100ug_NHS_Rep1_5Frac_Frac-5_SII_15614_1_15614_3_1	3.11123	4.41421e-05	6.75405e-13	R.VISSIEQK[UNIMOD:56]TDTSDK[UNIMOD:56]K[UNIMOD:56]LQLIK[UNIMOD:56]DYR.E	sp|P27348|1433T_HUMAN
U87MG_100ug_NHS_Rep1_5Frac_Frac-3_SII_16289_1_16289_3_1	3.10664	4.41421e-05	7.0236e-13	R.[UNIMOD:56]TATESFASDPILYRPVAVALDTK[UNIMOD:56]GPEIR.T	sp|P14618|KPYM_HUMAN
U87MG_100ug_NHS_Rep1_5Frac_Frac-5_SII_21365_1_21365_3_1	3.102	4.41421e-05	7.30728e-13	R.VLMEK[UNIMOD:56]EFPGFLENQK[UNIMOD:56]DPLAVDK[UNIMOD:56]IMK[UNIMOD:56]DLDQC[UNIMOD:4]R.D	sp|P60903|S10AA_HUMAN
U87MG_100ug_NHS_Rep1_5Frac_Frac-3_SII_16256_1_16256_4_1	3.09853	4.41421e-05	7.52664e-13	-.[UNIMOD:1]SK[UNIMOD:56]PHSEAGTAFIQTQQLHAAMADTFLEHMC[UNIMOD:4]R.L	sp|P14618|KPYM_HUMAN
U87MG_100ug_NHS_Rep1_5Frac_Frac-4_SII_8881_1_8881_4_1	3.09807	4.41421e-05	7.55607e-13	R.[UNIMOD:56]HQGVMVGMGQK[UNIMOD:56]DSYVGDEAQSK[UNIMOD:56]R.G	sp|P60709|ACTB_HUMAN
U87MG_100ug_NHS_Rep1_5Frac_Frac-3_SII_18799_1_18799_3_1	3.09644	4.41421e-05	7.66158e-13	R.K[UNIMOD:56]DGNASGTTLLEALDC[UNIMOD:4]ILPPTRPTDK[UNIMOD:56]PLR.L	sp|P68104|EF1A1_HUMAN
U87MG_100ug_NHS_Rep1_5Frac_Frac-3_SII_13899_1_13899_3_1	3.09542	4.41421e-05	7.72825e-13	-.[UNIMOD:1]SK[UNIMOD:56]PHSEAGTAFIQTQQLHAAMADTFLEHM[UNIMOD:35]C[UNIMOD:4]R.L	sp|P14618|KPYM_HUMAN
U87MG_100ug_NHS_Rep1_5Frac_Frac-1_SII_15224_1_15224_3_1	3.09528	4.41421e-05	7.73772e-13	R.K[UNIMOD:56]DGNASGTTLLEALDC[UNIMOD:4]ILPPTRPTDK[UNIMOD:56]PLR.L	sp|P68104|EF1A1_HUMAN
U87MG_100ug_NHS_Rep1_5Frac_Frac-4_SII_21650_1_21650_3_1	3.09268	4.41421e-05	7.91117e-13	R.THTQDAVPLTLGQEFSGYVQQVK[UNIMOD:56]YAMTR.I	sp|P07954|FUMH_HUMAN
U87MG_100ug_NHS_Rep1_5Frac_Frac-2_SII_22265_1_22265_3_1	3.08966	4.41421e-05	8.11752e-13	R.TNISDEESEQATEMLVHNAQNLMQSVK[UNIMOD:56]ETVR.E	sp|P18206|VINC_HUMAN
U87MG_100ug_NHS_Rep1_5Frac_Frac-2_SII_9762_1_9762_3_1	3.08737	4.41421e-05	8.27728e-13	-.[UNIMOD:56]PEPTK[UNIMOD:56]SAPAPK[UNIMOD:56]K[UNIMOD:56]GSK[UNIMOD:56]K[UNIMOD:56]AVTK[UNIMOD:56]AQK[UNIMOD:56]K[UNIMOD:56]DGK[UNIMOD:56]K[UNIMOD:56]R.K	sp|P58876|H2B1D_HUMAN
U87MG_100ug_NHS_Rep1_5Frac_Frac-5_SII_17295_1_17295_3_1	3.0851	4.41421e-05	8.43917e-13	-.[UNIMOD:1]SIGVPIK[UNIMOD:56]VLHEAEGHIVTC[UNIMOD:4]ETNTGEVYR.G	sp|P62318|SMD3_HUMAN
U87MG_100ug_NHS_Rep1_5Frac_Frac-2_SII_11067_1_11067_3_1	3.08224	4.41421e-05	8.64719e-13	R.INEWLTK[UNIMOD:56]TPDGNK[UNIMOD:56]SPAPK[UNIMOD:56]PSDLRPGDVSSK[UNIMOD:56]R.N	sp|Q05682|CALD1_HUMAN
U87MG_100ug_NHS_Rep1_5Frac_Frac-3_SII_16294_1_16294_4_1	3.08134	4.41421e-05	8.71359e-13	-.[UNIMOD:1]SK[UNIMOD:56]PHSEAGTAFIQTQQLHAAMADTFLEHMC[UNIMOD:4]R.L	sp|P14618|KPYM_HUMAN
U87MG_100ug_NHS_Rep1_5Frac_Frac-3_SII_16315_1_16315_3_1	3.081	4.41421e-05	8.73888e-13	R.[UNIMOD:56]TATESFASDPILYRPVAVALDTK[UNIMOD:56]GPEIR.T	sp|P14618|KPYM_HUMAN
U87MG_100ug_NHS_Rep1_5Frac_Frac-4_SII_22244_1_22244_3_1	3.07296	4.41421e-05	9.359e-13	R.GALQNIIPASTGAAK[UNIMOD:56]AVGK[UNIMOD:56]VIPELNGK[UNIMOD:56]LTGMAFR.V	sp|P04406|G3P_HUMAN
U87MG_100ug_NHS_Rep1_5Frac_Frac-2_SII_9280_1_9280_3_1	3.07026	4.41421e-05	9.57717e-13	R.LQAALDDEEAGGRPAMEPGNGSLDLGGDSAGR.S	sp|Q00839|HNRPU_HUMAN
U87MG_100ug_NHS_Rep1_5Frac_Frac-3_SII_21132_1_21132_3_1	3.06747	4.41421e-05	9.80683e-13	-.[UNIMOD:1]TSK[UNIMOD:56]K[UNIMOD:56]LVNSVAGC[UNIMOD:4]ADDALAGLVAC[UNIMOD:4]NPNLQLLQGHR.V	sp|Q3LXA3|TKFC_HUMAN
U87MG_100ug_NHS_Rep1_5Frac_Frac-1_SII_9742_1_9742_3_1	3.06662	4.41421e-05	9.87858e-13	R.TASTPTPPQTGGGLEPQANGETPQVAVIVRPDDR.S	sp|Q04637|IF4G1_HUMAN
U87MG_100ug_NHS_Rep1_5Frac_Frac-1_SII_9473_1_9473_3_1	3.06341	4.41421e-05	1.01525e-12	R.LQAALDDEEAGGRPAMEPGNGSLDLGGDSAGR.S	sp|Q00839|HNRPU_HUMAN
U87MG_100ug_NHS_Rep1_5Frac_Frac-1_SII_15743_1_15743_4_1	3.05723	4.41421e-05	1.07016e-12	-.[UNIMOD:1]SK[UNIMOD:56]PHSEAGTAFIQTQQLHAAMADTFLEHMC[UNIMOD:4]R.L	sp|P14618|KPYM_HUMAN
U87MG_100ug_NHS_Rep1_5Frac_Frac-5_SII_17711_1_17711_3_1	3.05389	4.41421e-05	1.1011e-12	R.TDITYPAGFMDVISIDK[UNIMOD:56]TGENFR.L	sp|P62701|RS4X_HUMAN
U87MG_100ug_NHS_Rep1_5Frac_Frac-1_SII_11369_1_11369_3_1	3.05181	4.41421e-05	1.12074e-12	R.K[UNIMOD:56]GEITGEVHMPSGK[UNIMOD:56]TATPEIVDNK[UNIMOD:56]DGTVTVR.Y	sp|O75369|FLNB_HUMAN
U87MG_100ug_NHS_Rep1_5Frac_Frac-1_SII_8448_1_8448_3_1	3.04084	4.41421e-05	1.2306e-12	D.PAK[UNIMOD:56]SAPAPK[UNIMOD:56]K[UNIMOD:56]GSK[UNIMOD:56]K[UNIMOD:56]AVTK[UNIMOD:56]AQK[UNIMOD:56]K[UNIMOD:56]DGK[UNIMOD:56]K[UNIMOD:56]R.K	sp|P62807|H2B1C_HUMAN
U87MG_100ug_NHS_Rep1_5Frac_Frac-3_SII_18854_1_18854_3_1	3.03977	4.41421e-05	1.24191e-12	-.[UNIMOD:1]ASMGTLAFDEYGRPFLIIK[UNIMOD:56]DQDR.K	sp|P48643|TCPE_HUMAN
U87MG_100ug_NHS_Rep1_5Frac_Frac-1_SII_16355_1_16355_4_1	3.03831	4.41421e-05	1.25746e-12	-.[UNIMOD:1]SK[UNIMOD:56]PHSEAGTAFIQTQQLHAAMADTFLEHMC[UNIMOD:4]R.L	sp|P14618|KPYM_HUMAN
U87MG_100ug_NHS_Rep1_5Frac_Frac-4_SII_10889_1_10889_2_1	3.03829	4.41421e-05	1.25762e-12	R.FHVEEEGK[UNIMOD:56]GK[UNIMOD:56]DASGNK[UNIMOD:56]VK[UNIMOD:56]AEPAK[UNIMOD:56]IEAFR.A	sp|P00558|PGK1_HUMAN
U87MG_100ug_NHS_Rep1_5Frac_Frac-1_SII_15137_1_15137_3_1	3.03492	4.41421e-05	1.29431e-12	R.K[UNIMOD:56]DGNASGTTLLEALDC[UNIMOD:4]ILPPTRPTDK[UNIMOD:56]PLR.L	sp|P68104|EF1A1_HUMAN
U87MG_100ug_NHS_Rep1_5Frac_Frac-1_SII_18395_1_18395_3_1	3.03341	4.41421e-05	1.31103e-12	A.[UNIMOD:27]EFTTNLTEEEEK[UNIMOD:56]SK[UNIMOD:56]SLAK[UNIMOD:56]LK[UNIMOD:56]NK[UNIMOD:56]HEAMITDLEER.L	sp|P35579|MYH9_HUMAN
U87MG_100ug_NHS_Rep1_5Frac_Frac-5_SII_15605_1_15605_4_1	3.03336	4.41421e-05	1.31162e-12	-.[UNIMOD:1]SK[UNIMOD:56]PHSEAGTAFIQTQQLHAAMADTFLEHMC[UNIMOD:4]R.L	sp|P14618|KPYM_HUMAN
U87MG_100ug_NHS_Rep1_5Frac_Frac-2_SII_15627_1_15627_3_1	3.03073	4.41421e-05	1.34132e-12	R.[UNIMOD:56]DNSTMGYMMAK[UNIMOD:56]K[UNIMOD:56]HLEINPDHPIVETLR.Q	sp|P08238|HS90B_HUMAN
U87MG_100ug_NHS_Rep1_5Frac_Frac-4_SII_18730_1_18730_3_1	3.02583	4.41421e-05	1.39847e-12	R.K[UNIMOD:56]DGNASGTTLLEALDC[UNIMOD:4]ILPPTRPTDK[UNIMOD:56]PLR.L	sp|P68104|EF1A1_HUMAN
U87MG_100ug_NHS_Rep1_5Frac_Frac-1_SII_16360_1_16360_3_1	3.02431	4.41421e-05	1.4167e-12	R.[UNIMOD:56]TATESFASDPILYRPVAVALDTK[UNIMOD:56]GPEIR.T	sp|P14618|KPYM_HUMAN
U87MG_100ug_NHS_Rep1_5Frac_Frac-1_SII_14997_1_14997_3_1	3.02162	4.41421e-05	1.44957e-12	R.K[UNIMOD:56]DGNASGTTLLEALDC[UNIMOD:4]ILPPTRPTDK[UNIMOD:56]PLR.L	sp|P68104|EF1A1_HUMAN
U87MG_100ug_NHS_Rep1_5Frac_Frac-5_SII_13980_1_13980_3_1	3.02034	4.41421e-05	1.46554e-12	R.YDDMAAAMK[UNIMOD:56]NVTELNEPLSNEER.N	sp|P61981|1433G_HUMAN
U87MG_100ug_NHS_Rep1_5Frac_Frac-4_SII_11091_1_11091_3_1	3.01188	4.41421e-05	1.57506e-12	R.FHVEEEGK[UNIMOD:56]GK[UNIMOD:56]DASGNK[UNIMOD:56]VK[UNIMOD:56]AEPAK[UNIMOD:56]IEAFR.A	sp|P00558|PGK1_HUMAN
U87MG_100ug_NHS_Rep1_5Frac_Frac-1_SII_8354_1_8354_3_1	3.0107	4.41421e-05	1.59102e-12	R.VHVQPAVDTSGVK[UNIMOD:56]VSGPGVEPHGVLR.E	sp|Q14315|FLNC_HUMAN
U87MG_100ug_NHS_Rep1_5Frac_Frac-3_SII_21662_1_21662_3_1	3.00154	4.41421e-05	1.72012e-12	-.[UNIMOD:1]ALHVPK[UNIMOD:56]APGFAQMLK[UNIMOD:56]EGAK[UNIMOD:56]HFSGLEEAVYR.N	sp|P50990|TCPQ_HUMAN
U87MG_100ug_NHS_Rep1_5Frac_Frac-4_SII_15358_1_15358_4_1	2.99841	4.41421e-05	1.76671e-12	-.[UNIMOD:1]SK[UNIMOD:56]PHSEAGTAFIQTQQLHAAMADTFLEHMC[UNIMOD:4]R.L	sp|P14618|KPYM_HUMAN
U87MG_100ug_NHS_Rep1_5Frac_Frac-3_SII_16025_1_16025_4_1	2.99051	4.41421e-05	1.8897e-12	-.[UNIMOD:1]SK[UNIMOD:56]PHSEAGTAFIQTQQLHAAMADTFLEHMC[UNIMOD:4]R.L	sp|P14618|KPYM_HUMAN
U87MG_100ug_NHS_Rep1_5Frac_Frac-3_SII_21093_1_21093_3_1	2.98763	4.41421e-05	1.93667e-12	-.[UNIMOD:1]TSK[UNIMOD:56]K[UNIMOD:56]LVNSVAGC[UNIMOD:4]ADDALAGLVAC[UNIMOD:4]NPNLQLLQGHR.V	sp|Q3LXA3|TKFC_HUMAN
U87MG_100ug_NHS_Rep1_5Frac_Frac-2_SII_17955_1_17955_3_1	2.9688	4.41421e-05	2.27391e-12	R.[UNIMOD:56]SIGAAAK[UNIMOD:56]SQVISNAK[UNIMOD:56]NTVQGFK[UNIMOD:56]R.F	sp|P34932|HSP74_HUMAN
U87MG_100ug_NHS_Rep1_5Frac_Frac-5_SII_8651_1_8651_3_1	2.96707	4.41421e-05	2.30767e-12	-.[UNIMOD:1]PEPAK[UNIMOD:56]SAPAPK[UNIMOD:56]K[UNIMOD:56]GSK[UNIMOD:56]K[UNIMOD:56]AVTK[UNIMOD:56]AQK[UNIMOD:56]K[UNIMOD:56]DGK[UNIMOD:56]K[UNIMOD:56]R.K	sp|P62807|H2B1C_HUMAN
U87MG_100ug_NHS_Rep1_5Frac_Frac-3_SII_12862_1_12862_3_1	2.96012	4.41421e-05	2.44847e-12	-.[UNIMOD:1]METEQPEETFPNTETNGEFGK[UNIMOD:56]RPAEDMEEEQAFK[UNIMOD:56]R.S	sp|P61978|HNRPK_HUMAN
U87MG_100ug_NHS_Rep1_5Frac_Frac-3_SII_16407_1_16407_4_1	2.95901	4.41421e-05	2.47168e-12	-.[UNIMOD:1]SK[UNIMOD:56]PHSEAGTAFIQTQQLHAAMADTFLEHMC[UNIMOD:4]R.L	sp|P14618|KPYM_HUMAN
U87MG_100ug_NHS_Rep1_5Frac_Frac-3_SII_13219_1_13219_3_1	2.95796	4.41421e-05	2.49398e-12	R.DGK[UNIMOD:56]MDK[UNIMOD:56]EETK[UNIMOD:56]DWILPSDYDHAEAEAR.H	sp|O43852|CALU_HUMAN
U87MG_100ug_NHS_Rep1_5Frac_Frac-5_SII_11148_1_11148_3_1	2.95178	4.41421e-05	2.62876e-12	R.FHVEEEGK[UNIMOD:56]GK[UNIMOD:56]DASGNK[UNIMOD:56]VK[UNIMOD:56]AEPAK[UNIMOD:56]IEAFR.A	sp|P00558|PGK1_HUMAN
U87MG_100ug_NHS_Rep1_5Frac_Frac-1_SII_22189_1_22189_3_1	2.94739	4.41421e-05	2.72907e-12	R.TNISDEESEQATEMLVHNAQNLMQSVK[UNIMOD:56]ETVR.E	sp|P18206|VINC_HUMAN
U87MG_100ug_NHS_Rep1_5Frac_Frac-2_SII_20616_1_20616_3_1	2.94012	4.41421e-05	2.90351e-12	R.[UNIMOD:56]TVEVEK[UNIMOD:56]VHLEK[UNIMOD:56]K[UNIMOD:56]LRDEINLAK[UNIMOD:56]QEAQR.L	sp|Q13586|STIM1_HUMAN
U87MG_100ug_NHS_Rep1_5Frac_Frac-1_SII_16734_1_16734_3_1	2.92978	4.41421e-05	3.17102e-12	S.[UNIMOD:27]EAGTAFIQTQQLHAAMADTFLEHMC[UNIMOD:4]R.L	sp|P14618|KPYM_HUMAN
U87MG_100ug_NHS_Rep1_5Frac_Frac-4_SII_8874_1_8874_2_1	2.92667	4.41421e-05	3.25609e-12	R.[UNIMOD:56]HQGVMVGMGQK[UNIMOD:56]DSYVGDEAQSK[UNIMOD:56]R.G	sp|P60709|ACTB_HUMAN
U87MG_100ug_NHS_Rep1_5Frac_Frac-4_SII_16007_1_16007_3_1	2.92602	4.41421e-05	3.27415e-12	-.[UNIMOD:1]DDDIAALVVDNGSGMC[UNIMOD:4]K[UNIMOD:56]AGFAGDDAPR.A	sp|P60709|ACTB_HUMAN
U87MG_100ug_NHS_Rep1_5Frac_Frac-1_SII_16584_1_16584_4_1	2.91888	4.41421e-05	3.47964e-12	-.[UNIMOD:1]SK[UNIMOD:56]PHSEAGTAFIQTQQLHAAMADTFLEHMC[UNIMOD:4]R.L	sp|P14618|KPYM_HUMAN
U87MG_100ug_NHS_Rep1_5Frac_Frac-1_SII_15994_1_15994_4_1	2.91597	4.41421e-05	3.56695e-12	-.[UNIMOD:1]SK[UNIMOD:56]PHSEAGTAFIQTQQLHAAMADTFLEHMC[UNIMOD:4]R.L	sp|P14618|KPYM_HUMAN
U87MG_100ug_NHS_Rep1_5Frac_Frac-4_SII_11112_1_11112_3_1	2.91482	4.41421e-05	3.60205e-12	R.FHVEEEGK[UNIMOD:56]GK[UNIMOD:56]DASGNK[UNIMOD:56]VK[UNIMOD:56]AEPAK[UNIMOD:56]IEAFR.A	sp|P00558|PGK1_HUMAN
U87MG_100ug_NHS_Rep1_5Frac_Frac-4_SII_12971_1_12971_3_1	2.91147	4.41421e-05	3.70653e-12	R.NALLSLAK[UNIMOD:56]GDRSEDFGVNEDLADSDAR.A	sp|P04083|ANXA1_HUMAN
U87MG_100ug_NHS_Rep1_5Frac_Frac-1_SII_22261_1_22261_3_1	2.91138	4.41421e-05	3.70938e-12	R.[UNIMOD:56]LLEMNLMHAPQVADAILGNQMFTHYDR.A	sp|Q00610|CLH1_HUMAN
U87MG_100ug_NHS_Rep1_5Frac_Frac-1_SII_15120_1_15120_3_1	2.91004	4.41421e-05	3.75201e-12	R.K[UNIMOD:56]DGNASGTTLLEALDC[UNIMOD:4]ILPPTRPTDK[UNIMOD:56]PLR.L	sp|P68104|EF1A1_HUMAN
U87MG_100ug_NHS_Rep1_5Frac_Frac-1_SII_15949_1_15949_4_1	2.90728	4.41421e-05	3.84102e-12	-.[UNIMOD:1]SK[UNIMOD:56]PHSEAGTAFIQTQQLHAAMADTFLEHMC[UNIMOD:4]R.L	sp|P14618|KPYM_HUMAN
U87MG_100ug_NHS_Rep1_5Frac_Frac-2_SII_14497_1_14497_3_1	2.90654	4.41421e-05	3.86531e-12	R.[UNIMOD:56]VHVSEEGTEPEAMLQVLGPK[UNIMOD:56]PALPAGTEDTAK[UNIMOD:56]EDAANR.K	sp|P06396|GELS_HUMAN
U87MG_100ug_NHS_Rep1_5Frac_Frac-4_SII_13970_1_13970_3_1	2.90136	4.41421e-05	4.04007e-12	R.YASIC[UNIMOD:4]QQNGIVPIVEPEILPDGDHDLK[UNIMOD:56]R.C	sp|P09972|ALDOC_HUMAN
U87MG_100ug_NHS_Rep1_5Frac_Frac-1_SII_16910_1_16910_3_1	2.89518	4.41421e-05	4.25826e-12	S.[UNIMOD:27]EAGTAFIQTQQLHAAMADTFLEHMC[UNIMOD:4]R.L	sp|P14618|KPYM_HUMAN
U87MG_100ug_NHS_Rep1_5Frac_Frac-5_SII_8844_1_8844_3_1	2.89153	4.41421e-05	4.39297e-12	-.[UNIMOD:1]PEPAK[UNIMOD:56]SAPAPK[UNIMOD:56]K[UNIMOD:56]GSK[UNIMOD:56]K[UNIMOD:56]AVTK[UNIMOD:56]AQK[UNIMOD:56]K[UNIMOD:56]DGK[UNIMOD:56]K[UNIMOD:56]R.K	sp|P62807|H2B1C_HUMAN
U87MG_100ug_NHS_Rep1_5Frac_Frac-1_SII_16048_1_16048_4_1	2.89113	4.41421e-05	4.40797e-12	-.[UNIMOD:1]SK[UNIMOD:56]PHSEAGTAFIQTQQLHAAMADTFLEHMC[UNIMOD:4]R.L	sp|P14618|KPYM_HUMAN
U87MG_100ug_NHS_Rep1_5Frac_Frac-3_SII_16031_1_16031_3_1	2.89005	4.41421e-05	4.44869e-12	G.[UNIMOD:27]EVIVTK[UNIMOD:56]DDAMLLK[UNIMOD:56]GK[UNIMOD:56]GDK[UNIMOD:56]AQIEK[UNIMOD:56]R.I	sp|P10809|CH60_HUMAN
U87MG_100ug_NHS_Rep1_5Frac_Frac-3_SII_16852_1_16852_3_1	2.88688	4.41421e-05	4.57057e-12	-.[UNIMOD:1]AEMGSK[UNIMOD:56]GVTAGK[UNIMOD:56]IASNVQK[UNIMOD:56]K[UNIMOD:56]LTR.A	sp|O00499|BIN1_HUMAN
U87MG_100ug_NHS_Rep1_5Frac_Frac-5_SII_18188_1_18188_4_1	2.88309	4.41421e-05	4.72052e-12	-.[UNIMOD:1]ASNK[UNIMOD:56]TTLQK[UNIMOD:56]MGK[UNIMOD:56]K[UNIMOD:56]QNGK[UNIMOD:56]SK[UNIMOD:56]K[UNIMOD:56]VEEAEPEEFVVEK[UNIMOD:56]VLDRR.V	sp|Q13185|CBX3_HUMAN
U87MG_100ug_NHS_Rep1_5Frac_Frac-4_SII_11286_1_11286_3_1	2.88172	4.41421e-05	4.77614e-12	C.[UNIMOD:27]ELK[UNIMOD:56]ADK[UNIMOD:56]DYHFK[UNIMOD:56]VDNDENEHQLSLR.T	sp|P06748|NPM_HUMAN
U87MG_100ug_NHS_Rep1_5Frac_Frac-5_SII_17780_1_17780_3_1	2.88048	4.41421e-05	4.82658e-12	R.TDITYPAGFMDVISIDK[UNIMOD:56]TGENFR.L	sp|P62701|RS4X_HUMAN
U87MG_100ug_NHS_Rep1_5Frac_Frac-5_SII_8780_1_8780_3_1	2.87534	4.41421e-05	5.04305e-12	-.[UNIMOD:1]PEPAK[UNIMOD:56]SAPAPK[UNIMOD:56]K[UNIMOD:56]GSK[UNIMOD:56]K[UNIMOD:56]AVTK[UNIMOD:56]AQK[UNIMOD:56]K[UNIMOD:56]DGK[UNIMOD:56]K[UNIMOD:56]R.K	sp|P62807|H2B1C_HUMAN
U87MG_100ug_NHS_Rep1_5Frac_Frac-1_SII_13508_1_13508_3_1	2.87335	4.41421e-05	5.12914e-12	R.TEMEDLM[UNIMOD:35]SSK[UNIMOD:56]DDVGK[UNIMOD:56]SVHELEK[UNIMOD:56]SK[UNIMOD:56]R.A	sp|P35579|MYH9_HUMAN
U87MG_100ug_NHS_Rep1_5Frac_Frac-3_SII_19285_1_19285_3_1	2.86829	4.41421e-05	5.35507e-12	R.K[UNIMOD:56]DGNASGTTLLEALDC[UNIMOD:4]ILPPTRPTDK[UNIMOD:56]PLR.L	sp|P68104|EF1A1_HUMAN
U87MG_100ug_NHS_Rep1_5Frac_Frac-1_SII_23070_1_23070_3_1	2.8671	4.41421e-05	5.40959e-12	R.[UNIMOD:56]GVGAAATAVTQALNELLQHVK[UNIMOD:56]AHATGAGPAGR.Y	sp|Q9Y490|TLN1_HUMAN
U87MG_100ug_NHS_Rep1_5Frac_Frac-1_SII_8468_1_8468_3_1	2.86652	4.41421e-05	5.43651e-12	D.PAK[UNIMOD:56]SAPAPK[UNIMOD:56]K[UNIMOD:56]GSK[UNIMOD:56]K[UNIMOD:56]AVTK[UNIMOD:56]AQK[UNIMOD:56]K[UNIMOD:56]DGK[UNIMOD:56]K[UNIMOD:56]R.K	sp|P62807|H2B1C_HUMAN
U87MG_100ug_NHS_Rep1_5Frac_Frac-4_SII_11256_1_11256_3_1	2.86615	4.41421e-05	5.45375e-12	C.[UNIMOD:27]ELK[UNIMOD:56]ADK[UNIMOD:56]DYHFK[UNIMOD:56]VDNDENEHQLSLR.T	sp|P06748|NPM_HUMAN
U87MG_100ug_NHS_Rep1_5Frac_Frac-1_SII_8336_1_8336_3_1	2.86527	4.41421e-05	5.49463e-12	R.VHVQPAVDTSGVK[UNIMOD:56]VSGPGVEPHGVLR.E	sp|Q14315|FLNC_HUMAN
U87MG_100ug_NHS_Rep1_5Frac_Frac-5_SII_15029_1_15029_3_1	2.86271	4.41421e-05	5.61579e-12	R.AMK[UNIMOD:56]DEEK[UNIMOD:56]MEIQEMQLK[UNIMOD:56]EAK[UNIMOD:56]HIAEEADR.K	sp|P67936|TPM4_HUMAN
U87MG_100ug_NHS_Rep1_5Frac_Frac-5_SII_12488_1_12488_3_1	2.86242	4.41421e-05	5.63001e-12	R.VLK[UNIMOD:56]QK[UNIMOD:56]EVEQLIK[UNIMOD:56]K[UNIMOD:56]HEEEEAK[UNIMOD:56]AER.E	sp|P25789|PSA4_HUMAN
U87MG_100ug_NHS_Rep1_5Frac_Frac-3_SII_16523_1_16523_4_1	2.86077	4.41421e-05	5.70977e-12	-.[UNIMOD:1]SK[UNIMOD:56]PHSEAGTAFIQTQQLHAAMADTFLEHMC[UNIMOD:4]R.L	sp|P14618|KPYM_HUMAN
U87MG_100ug_NHS_Rep1_5Frac_Frac-1_SII_13935_1_13935_3_1	2.85841	4.41421e-05	5.82548e-12	-.[UNIMOD:1]SK[UNIMOD:56]PHSEAGTAFIQTQQLHAAMADTFLEHM[UNIMOD:35]C[UNIMOD:4]R.L	sp|P14618|KPYM_HUMAN
U87MG_100ug_NHS_Rep1_5Frac_Frac-2_SII_8818_1_8818_2_1	2.85369	4.41421e-05	6.06452e-12	R.YHTSQSGDEMTSLSEYVSR.M	sp|P08238|HS90B_HUMAN
U87MG_100ug_NHS_Rep1_5Frac_Frac-1_SII_17831_1_17831_4_1	2.85204	4.41421e-05	6.15091e-12	-.[UNIMOD:1]APK[UNIMOD:56]AK[UNIMOD:56]K[UNIMOD:56]EAPAPPK[UNIMOD:56]AEAK[UNIMOD:56]AK[UNIMOD:56]ALK[UNIMOD:56]AK[UNIMOD:56]K[UNIMOD:56]AVLK[UNIMOD:56]GVHSHK[UNIMOD:56]K[UNIMOD:56]K[UNIMOD:56]K[UNIMOD:56]IR.T	sp|P62750|RL23A_HUMAN
U87MG_100ug_NHS_Rep1_5Frac_Frac-4_SII_22748_1_22748_3_1	2.85148	4.41421e-05	6.18e-12	-.[UNIMOD:56]PELAVQK[UNIMOD:56]VVVHPLVLLSVVDHFNR.I	sp|P51665|PSMD7_HUMAN
U87MG_100ug_NHS_Rep1_5Frac_Frac-2_SII_14063_1_14063_2_1	2.84689	4.41421e-05	6.42649e-12	R.[UNIMOD:28]QK[UNIMOD:56]HSQAVEELAEQLEQTK[UNIMOD:56]R.V	sp|P35579|MYH9_HUMAN
U87MG_100ug_NHS_Rep1_5Frac_Frac-2_SII_17460_1_17460_3_1	2.84206	4.41421e-05	6.69683e-12	R.LEGENTQDK[UNIMOD:56]NK[UNIMOD:56]K[UNIMOD:56]LRPLYDIPYMFEAR.E	sp|Q7KZF4|SND1_HUMAN
U87MG_100ug_NHS_Rep1_5Frac_Frac-3_SII_22917_1_22917_3_1	2.84105	4.41421e-05	6.75475e-12	-.[UNIMOD:1]AAADGDDSLYPIAVLIDELR.N	sp|P30153|2AAA_HUMAN
U87MG_100ug_NHS_Rep1_5Frac_Frac-1_SII_11350_1_11350_3_1	2.84073	4.41421e-05	6.77282e-12	R.K[UNIMOD:56]GEITGEVHMPSGK[UNIMOD:56]TATPEIVDNK[UNIMOD:56]DGTVTVR.Y	sp|O75369|FLNB_HUMAN
U87MG_100ug_NHS_Rep1_5Frac_Frac-5_SII_14239_1_14239_3_1	2.8387	4.41421e-05	6.89116e-12	R.[UNIMOD:56]YDDMAAAMK[UNIMOD:56]AVTEQGHELSNEER.N	sp|P31946|1433B_HUMAN
U87MG_100ug_NHS_Rep1_5Frac_Frac-3_SII_18866_1_18866_3_1	2.83671	4.41421e-05	7.00891e-12	C.[UNIMOD:27]EQALAAEPK[UNIMOD:56]AK[UNIMOD:56]DPFAHLPK[UNIMOD:56]STFVLDEFK[UNIMOD:56]R.K	sp|P26641|EF1G_HUMAN
U87MG_100ug_NHS_Rep1_5Frac_Frac-4_SII_8919_1_8919_3_1	2.83666	4.41421e-05	7.0119e-12	-.[UNIMOD:56]PEPAK[UNIMOD:56]SAPAPK[UNIMOD:56]K[UNIMOD:56]GSK[UNIMOD:56]K[UNIMOD:56]AVTK[UNIMOD:56]AQK[UNIMOD:56]K[UNIMOD:56]DGK[UNIMOD:56]K[UNIMOD:56]R.K	sp|P62807|H2B1C_HUMAN
U87MG_100ug_NHS_Rep1_5Frac_Frac-3_SII_13246_1_13246_3_1	2.83149	4.41421e-05	7.32783e-12	R.DGK[UNIMOD:56]MDK[UNIMOD:56]EETK[UNIMOD:56]DWILPSDYDHAEAEAR.H	sp|O43852|CALU_HUMAN
U87MG_100ug_NHS_Rep1_5Frac_Frac-1_SII_9720_1_9720_3_1	2.83117	4.41421e-05	7.34786e-12	R.TASTPTPPQTGGGLEPQANGETPQVAVIVRPDDR.S	sp|Q04637|IF4G1_HUMAN
U87MG_100ug_NHS_Rep1_5Frac_Frac-2_SII_15957_1_15957_2_1	2.8181	4.41421e-05	8.21414e-12	-.[UNIMOD:1]DDDIAALVVDNGSGMC[UNIMOD:4]K[UNIMOD:56]AGFAGDDAPR.A	sp|P60709|ACTB_HUMAN
U87MG_100ug_NHS_Rep1_5Frac_Frac-1_SII_22251_1_22251_3_1	2.81733	4.41421e-05	8.26758e-12	R.TNISDEESEQATEMLVHNAQNLMQSVK[UNIMOD:56]ETVR.E	sp|P18206|VINC_HUMAN
U87MG_100ug_NHS_Rep1_5Frac_Frac-1_SII_15891_1_15891_4_1	2.81645	4.41421e-05	8.32984e-12	-.[UNIMOD:1]SK[UNIMOD:56]PHSEAGTAFIQTQQLHAAMADTFLEHMC[UNIMOD:4]R.L	sp|P14618|KPYM_HUMAN
U87MG_100ug_NHS_Rep1_5Frac_Frac-1_SII_18856_1_18856_2_1	2.81049	4.41421e-05	8.76436e-12	R.VEESTQVGGDPFPAVFGDFLGR.E	sp|Q14315|FLNC_HUMAN
U87MG_100ug_NHS_Rep1_5Frac_Frac-3_SII_13904_1_13904_4_1	2.8088	4.41421e-05	8.89141e-12	-.[UNIMOD:1]SK[UNIMOD:56]PHSEAGTAFIQTQQLHAAMADTFLEHM[UNIMOD:35]C[UNIMOD:4]R.L	sp|P14618|KPYM_HUMAN
U87MG_100ug_NHS_Rep1_5Frac_Frac-3_SII_11334_1_11334_3_1	2.80795	4.41421e-05	8.95598e-12	R.FHVEEEGK[UNIMOD:56]GK[UNIMOD:56]DASGNK[UNIMOD:56]VK[UNIMOD:56]AEPAK[UNIMOD:56]IEAFR.A	sp|P00558|PGK1_HUMAN
U87MG_100ug_NHS_Rep1_5Frac_Frac-1_SII_8752_1_8752_4_1	2.8071	4.41421e-05	9.02088e-12	-.PEPAK[UNIMOD:56]SAPAPK[UNIMOD:56]K[UNIMOD:56]GSK[UNIMOD:56]K[UNIMOD:56]AVTK[UNIMOD:56]AQK[UNIMOD:56]K[UNIMOD:56]DGK[UNIMOD:56]K[UNIMOD:56]R.K	sp|P62807|H2B1C_HUMAN
U87MG_100ug_NHS_Rep1_5Frac_Frac-1_SII_11395_1_11395_3_1	2.807	4.41421e-05	9.02873e-12	R.LQAEEVAQQK[UNIMOD:56]SLAQAEAEK[UNIMOD:56]QK[UNIMOD:56]EEAER.E	sp|Q15149|PLEC_HUMAN
U87MG_100ug_NHS_Rep1_5Frac_Frac-1_SII_16338_1_16338_4_1	2.80593	4.41421e-05	9.11141e-12	-.[UNIMOD:1]SK[UNIMOD:56]PHSEAGTAFIQTQQLHAAMADTFLEHMC[UNIMOD:4]R.L	sp|P14618|KPYM_HUMAN
U87MG_100ug_NHS_Rep1_5Frac_Frac-3_SII_22864_1_22864_3_1	2.80207	4.41421e-05	9.41625e-12	R.[UNIMOD:56]GLK[UNIMOD:56]MASTFIGNSTAIQELFK[UNIMOD:56]R.I	sp|Q9BUF5|TBB6_HUMAN
U87MG_100ug_NHS_Rep1_5Frac_Frac-3_SII_16240_1_16240_4_1	2.80188	4.41421e-05	9.43111e-12	-.[UNIMOD:1]SK[UNIMOD:56]PHSEAGTAFIQTQQLHAAMADTFLEHMC[UNIMOD:4]R.L	sp|P14618|KPYM_HUMAN
U87MG_100ug_NHS_Rep1_5Frac_Frac-2_SII_13809_1_13809_3_1	2.80001	4.41421e-05	9.58298e-12	R.[UNIMOD:28]QK[UNIMOD:56]ASIHEAWTDGK[UNIMOD:56]EAMLK[UNIMOD:56]HR.D	sp|O43707|ACTN4_HUMAN
U87MG_100ug_NHS_Rep1_5Frac_Frac-5_SII_17340_1_17340_3_1	2.7997	4.41421e-05	9.60816e-12	-.[UNIMOD:1]SIGVPIK[UNIMOD:56]VLHEAEGHIVTC[UNIMOD:4]ETNTGEVYR.G	sp|P62318|SMD3_HUMAN
U87MG_100ug_NHS_Rep1_5Frac_Frac-3_SII_22796_1_22796_3_1	2.79822	4.41421e-05	9.7307e-12	R.[UNIMOD:56]SNPK[UNIMOD:56]IWNVHSVLNVLHSLVDK[UNIMOD:56]SNINR.Q	sp|Q9Y262|EIF3L_HUMAN
U87MG_100ug_NHS_Rep1_5Frac_Frac-1_SII_21785_1_21785_3_1	2.79488	4.41421e-05	1.00114e-11	R.DLVAIEAK[UNIMOD:56]LSDLQK[UNIMOD:56]EAEK[UNIMOD:56]LESEHPDQAQAILSR.L	sp|Q01082|SPTB2_HUMAN
U87MG_100ug_NHS_Rep1_5Frac_Frac-2_SII_14035_1_14035_2_1	2.79407	4.41421e-05	1.00806e-11	R.[UNIMOD:28]QK[UNIMOD:56]HSQAVEELAEQLEQTK[UNIMOD:56]R.V	sp|P35579|MYH9_HUMAN
U87MG_100ug_NHS_Rep1_5Frac_Frac-2_SII_4446_1_4446_3_1	2.79151	4.41421e-05	1.03033e-11	R.[UNIMOD:56]SQGDEAGGHGEDRPEPLSPK[UNIMOD:56]ESK[UNIMOD:56]K[UNIMOD:56]R.K	sp|Q9NZT2|OGFR_HUMAN
U87MG_100ug_NHS_Rep1_5Frac_Frac-3_SII_16306_1_16306_4_1	2.79067	4.41421e-05	1.03773e-11	-.[UNIMOD:1]SK[UNIMOD:56]PHSEAGTAFIQTQQLHAAMADTFLEHMC[UNIMOD:4]R.L	sp|P14618|KPYM_HUMAN
U87MG_100ug_NHS_Rep1_5Frac_Frac-5_SII_18795_1_18795_3_1	2.78835	4.41421e-05	1.05842e-11	R.K[UNIMOD:56]DGNASGTTLLEALDC[UNIMOD:4]ILPPTRPTDK[UNIMOD:56]PLR.L	sp|P68104|EF1A1_HUMAN
U87MG_100ug_NHS_Rep1_5Frac_Frac-4_SII_8297_1_8297_3_1	2.7873	4.41421e-05	1.06791e-11	R.NDTK[UNIMOD:56]EDVFVHQTAIK[UNIMOD:56]K[UNIMOD:56]NNPR.K	sp|P67809|YBOX1_HUMAN
U87MG_100ug_NHS_Rep1_5Frac_Frac-1_SII_17197_1_17197_3_1	2.78498	4.41421e-05	1.08925e-11	-.[UNIMOD:1]SIGVPIK[UNIMOD:56]VLHEAEGHIVTC[UNIMOD:4]ETNTGEVYR.G	sp|P62318|SMD3_HUMAN
U87MG_100ug_NHS_Rep1_5Frac_Frac-4_SII_14838_1_14838_3_1	2.78321	4.41421e-05	1.10577e-11	R.AMK[UNIMOD:56]DEEK[UNIMOD:56]MEIQEMQLK[UNIMOD:56]EAK[UNIMOD:56]HIAEEADR.K	sp|P67936|TPM4_HUMAN
U87MG_100ug_NHS_Rep1_5Frac_Frac-5_SII_8762_1_8762_3_1	2.78187	4.41421e-05	1.11849e-11	-.[UNIMOD:1]PEPAK[UNIMOD:56]SAPAPK[UNIMOD:56]K[UNIMOD:56]GSK[UNIMOD:56]K[UNIMOD:56]AVTK[UNIMOD:56]AQK[UNIMOD:56]K[UNIMOD:56]DGK[UNIMOD:56]K[UNIMOD:56]R.K	sp|P62807|H2B1C_HUMAN
U87MG_100ug_NHS_Rep1_5Frac_Frac-1_SII_16056_1_16056_4_1	2.7814	4.41421e-05	1.12301e-11	-.[UNIMOD:1]SK[UNIMOD:56]PHSEAGTAFIQTQQLHAAMADTFLEHMC[UNIMOD:4]R.L	sp|P14618|KPYM_HUMAN
U87MG_100ug_NHS_Rep1_5Frac_Frac-2_SII_14862_1_14862_3_1	2.77874	4.41421e-05	1.14877e-11	R.[UNIMOD:27]EHGAFDAVK[UNIMOD:56]C[UNIMOD:4]THWAEGGK[UNIMOD:56]GALALAQAVQR.A	sp|P11586|C1TC_HUMAN
U87MG_100ug_NHS_Rep1_5Frac_Frac-2_SII_20410_1_20410_3_1	2.77631	4.41421e-05	1.17276e-11	R.[UNIMOD:28]QK[UNIMOD:56]DYETATLSEIK[UNIMOD:56]ALLK[UNIMOD:56]K[UNIMOD:56]HEAFESDLAAHQDR.V	sp|P12814|ACTN1_HUMAN
U87MG_100ug_NHS_Rep1_5Frac_Frac-5_SII_6395_1_6395_3_1	2.77627	4.41421e-05	1.17317e-11	R.TLVVHEK[UNIMOD:56]ADDLGK[UNIMOD:56]GGNEESTK[UNIMOD:56]TGNAGSR.L	sp|P00441|SODC_HUMAN
U87MG_100ug_NHS_Rep1_5Frac_Frac-5_SII_15426_1_15426_3_1	2.77624	4.41421e-05	1.17345e-11	R.ALK[UNIMOD:56]DEEK[UNIMOD:56]MELQEIQLK[UNIMOD:56]EAK[UNIMOD:56]HIAEEADR.K	sp|P06753|TPM3_HUMAN
U87MG_100ug_NHS_Rep1_5Frac_Frac-4_SII_11300_1_11300_3_1	2.77468	4.41421e-05	1.18921e-11	R.FHVEEEGK[UNIMOD:56]GK[UNIMOD:56]DASGNK[UNIMOD:56]VK[UNIMOD:56]AEPAK[UNIMOD:56]IEAFR.A	sp|P00558|PGK1_HUMAN
U87MG_100ug_NHS_Rep1_5Frac_Frac-5_SII_22486_1_22486_3_1	2.77443	4.41421e-05	1.19173e-11	-.[UNIMOD:1]ASGVAVSDGVIK[UNIMOD:56]VFNDMK[UNIMOD:56]VR.K	sp|P23528|COF1_HUMAN
U87MG_100ug_NHS_Rep1_5Frac_Frac-3_SII_21731_1_21731_3_1	2.7713	4.41421e-05	1.22398e-11	R.[UNIMOD:56]SGVSLAALK[UNIMOD:56]K[UNIMOD:56]ALAAAGYDVEK[UNIMOD:56]NNSR.I	sp|P16403|H12_HUMAN
U87MG_100ug_NHS_Rep1_5Frac_Frac-1_SII_15002_1_15002_3_1	2.76978	4.41421e-05	1.23996e-11	R.TATESFASDPILYRPVAVALDTK[UNIMOD:56]GPEIR.T	sp|P14618|KPYM_HUMAN
U87MG_100ug_NHS_Rep1_5Frac_Frac-4_SII_14197_1_14197_3_1	2.76936	4.41421e-05	1.24437e-11	R.AQK[UNIMOD:56]DEEK[UNIMOD:56]MEIQEIQLK[UNIMOD:56]EAK[UNIMOD:56]HIAEDADR.K	sp|P09493|TPM1_HUMAN
U87MG_100ug_NHS_Rep1_5Frac_Frac-5_SII_17079_1_17079_3_1	2.76792	4.41421e-05	1.25976e-11	-.[UNIMOD:1]SIGVPIK[UNIMOD:56]VLHEAEGHIVTC[UNIMOD:4]ETNTGEVYR.G	sp|P62318|SMD3_HUMAN
U87MG_100ug_NHS_Rep1_5Frac_Frac-1_SII_23127_1_23127_2_1	2.76614	4.41421e-05	1.27904e-11	R.DLGEELEALK[UNIMOD:56]TELEDTLDSTAAQQELR.S	sp|P35579|MYH9_HUMAN
U87MG_100ug_NHS_Rep1_5Frac_Frac-5_SII_20364_1_20364_3_1	2.76504	4.41421e-05	1.29108e-11	-.[UNIMOD:1]ASGVAVSDGVIK[UNIMOD:56]VFNDMK[UNIMOD:56]VR.K	sp|P23528|COF1_HUMAN
U87MG_100ug_NHS_Rep1_5Frac_Frac-1_SII_14031_1_14031_2_1	2.76162	4.41421e-05	1.32916e-11	R.[UNIMOD:28][UNIMOD:56]QK[UNIMOD:56]HSQAVEELAEQLEQTK[UNIMOD:56]R.V	sp|P35579|MYH9_HUMAN
U87MG_100ug_NHS_Rep1_5Frac_Frac-1_SII_17605_1_17605_3_1	2.76161	4.41421e-05	1.32932e-11	R.[UNIMOD:56]SGHFEQAIK[UNIMOD:56]EGEDMIAEEHFGSEK[UNIMOD:56]IR.E	sp|Q01082|SPTB2_HUMAN
U87MG_100ug_NHS_Rep1_5Frac_Frac-3_SII_19657_1_19657_3_1	2.75737	4.41421e-05	1.37827e-11	R.AEGSDVANAVLDGADC[UNIMOD:4]IMLSGETAK[UNIMOD:56]GDYPLEAVR.M	sp|P14618|KPYM_HUMAN
U87MG_100ug_NHS_Rep1_5Frac_Frac-2_SII_15472_1_15472_4_1	2.75533	4.41421e-05	1.40242e-11	-.[UNIMOD:1]SK[UNIMOD:56]PHSEAGTAFIQTQQLHAAMADTFLEHMC[UNIMOD:4]R.L	sp|P14618|KPYM_HUMAN
U87MG_100ug_NHS_Rep1_5Frac_Frac-2_SII_14061_1_14061_3_1	2.75471	4.41421e-05	1.40981e-11	-.[UNIMOD:1]AAVQAAEVK[UNIMOD:56]VDGSEPK[UNIMOD:56]LSK[UNIMOD:56]NELK[UNIMOD:56]R.R	sp|Q15046|SYK_HUMAN
U87MG_100ug_NHS_Rep1_5Frac_Frac-1_SII_9986_1_9986_3_1	2.75435	4.41421e-05	1.41414e-11	-.[UNIMOD:56]PEPAK[UNIMOD:56]SAPAPK[UNIMOD:56]K[UNIMOD:56]GSK[UNIMOD:56]K[UNIMOD:56]AVTK[UNIMOD:56]AQK[UNIMOD:56]K[UNIMOD:56]DGK[UNIMOD:56]K[UNIMOD:56]R.K	sp|P62807|H2B1C_HUMAN
U87MG_100ug_NHS_Rep1_5Frac_Frac-1_SII_16016_1_16016_4_1	2.7541	4.41421e-05	1.41725e-11	-.[UNIMOD:1]SK[UNIMOD:56]PHSEAGTAFIQTQQLHAAMADTFLEHMC[UNIMOD:4]R.L	sp|P14618|KPYM_HUMAN
U87MG_100ug_NHS_Rep1_5Frac_Frac-2_SII_20513_1_20513_3_1	2.75231	4.41421e-05	1.439e-11	-.[UNIMOD:56]VNFTVDQIRAIMDK[UNIMOD:56]K[UNIMOD:56]ANIR.N	sp|P13639|EF2_HUMAN
U87MG_100ug_NHS_Rep1_5Frac_Frac-5_SII_18276_1_18276_4_1	2.75191	4.41421e-05	1.44393e-11	-.[UNIMOD:1]ASNK[UNIMOD:56]TTLQK[UNIMOD:56]MGK[UNIMOD:56]K[UNIMOD:56]QNGK[UNIMOD:56]SK[UNIMOD:56]K[UNIMOD:56]VEEAEPEEFVVEK[UNIMOD:56]VLDRR.V	sp|Q13185|CBX3_HUMAN
U87MG_100ug_NHS_Rep1_5Frac_Frac-1_SII_14757_1_14757_3_1	2.74681	4.41421e-05	1.50806e-11	S.[UNIMOD:27]EAGTAFIQTQQLHAAM[UNIMOD:35]ADTFLEHMC[UNIMOD:4]R.L	sp|P14618|KPYM_HUMAN
U87MG_100ug_NHS_Rep1_5Frac_Frac-1_SII_17638_1_17638_3_1	2.74675	4.41421e-05	1.50882e-11	R.C[UNIMOD:4]QHLQAEK[UNIMOD:56]K[UNIMOD:56]K[UNIMOD:56]MQQNIQELEEQLEEEESAR.Q	sp|P35579|MYH9_HUMAN
U87MG_100ug_NHS_Rep1_5Frac_Frac-3_SII_16678_1_16678_3_1	2.74635	4.41421e-05	1.51391e-11	S.[UNIMOD:27]EAGTAFIQTQQLHAAMADTFLEHMC[UNIMOD:4]R.L	sp|P14618|KPYM_HUMAN
U87MG_100ug_NHS_Rep1_5Frac_Frac-1_SII_14227_1_14227_2_1	2.7461	4.41421e-05	1.51721e-11	R.[UNIMOD:28]QK[UNIMOD:56]HSQAVEELAEQLEQTK[UNIMOD:56]R.V	sp|P35579|MYH9_HUMAN
U87MG_100ug_NHS_Rep1_5Frac_Frac-1_SII_10111_1_10111_3_1	2.74417	4.41421e-05	1.54235e-11	R.SAGQGEVLVYVEDPAGHQEEAK[UNIMOD:56]VTANNDK[UNIMOD:56]NR.T	sp|P21333|FLNA_HUMAN
U87MG_100ug_NHS_Rep1_5Frac_Frac-1_SII_15958_1_15958_4_1	2.74144	4.41421e-05	1.57861e-11	-.[UNIMOD:1]SK[UNIMOD:56]PHSEAGTAFIQTQQLHAAMADTFLEHMC[UNIMOD:4]R.L	sp|P14618|KPYM_HUMAN
U87MG_100ug_NHS_Rep1_5Frac_Frac-5_SII_12450_1_12450_3_1	2.7391	4.41421e-05	1.61044e-11	R.VLK[UNIMOD:56]QK[UNIMOD:56]EVEQLIK[UNIMOD:56]K[UNIMOD:56]HEEEEAK[UNIMOD:56]AER.E	sp|P25789|PSA4_HUMAN
U87MG_100ug_NHS_Rep1_5Frac_Frac-3_SII_17153_1_17153_3_1	2.73794	4.41421e-05	1.62646e-11	H.[UNIMOD:56]SEAGTAFIQTQQLHAAMADTFLEHMC[UNIMOD:4]R.L	sp|P14618|KPYM_HUMAN
U87MG_100ug_NHS_Rep1_5Frac_Frac-4_SII_21631_1_21631_3_1	2.73572	4.41421e-05	1.65753e-11	R.THTQDAVPLTLGQEFSGYVQQVK[UNIMOD:56]YAMTR.I	sp|P07954|FUMH_HUMAN
U87MG_100ug_NHS_Rep1_5Frac_Frac-1_SII_13720_1_13720_4_1	2.73423	4.41421e-05	1.67864e-11	-.[UNIMOD:1]SK[UNIMOD:56]PHSEAGTAFIQTQQLHAAM[UNIMOD:35]ADTFLEHMC[UNIMOD:4]R.L	sp|P14618|KPYM_HUMAN
U87MG_100ug_NHS_Rep1_5Frac_Frac-3_SII_13651_1_13651_4_1	2.73345	4.41421e-05	1.68991e-11	-.[UNIMOD:1]SK[UNIMOD:56]PHSEAGTAFIQTQQLHAAM[UNIMOD:35]ADTFLEHMC[UNIMOD:4]R.L	sp|P14618|KPYM_HUMAN
U87MG_100ug_NHS_Rep1_5Frac_Frac-2_SII_17505_1_17505_3_1	2.73252	4.41421e-05	1.70332e-11	R.LEGENTQDK[UNIMOD:56]NK[UNIMOD:56]K[UNIMOD:56]LRPLYDIPYMFEAR.E	sp|Q7KZF4|SND1_HUMAN
U87MG_100ug_NHS_Rep1_5Frac_Frac-5_SII_8481_1_8481_3_1	2.73245	4.41421e-05	1.70432e-11	-.[UNIMOD:1]PEPTK[UNIMOD:56]SAPAPK[UNIMOD:56]K[UNIMOD:56]GSK[UNIMOD:56]K[UNIMOD:56]AVTK[UNIMOD:56]AQK[UNIMOD:56]K[UNIMOD:56]DGK[UNIMOD:56]K[UNIMOD:56]R.K	sp|P58876|H2B1D_HUMAN
U87MG_100ug_NHS_Rep1_5Frac_Frac-4_SII_15301_1_15301_3_1	2.73188	4.41421e-05	1.71263e-11	R.[UNIMOD:56]TTGIVMDSGDGVTHTVPIYEGYALPHAILR.L	sp|P60709|ACTB_HUMAN
U87MG_100ug_NHS_Rep1_5Frac_Frac-4_SII_10827_1_10827_3_1	2.72921	4.41421e-05	1.75206e-11	R.FHVEEEGK[UNIMOD:56]GK[UNIMOD:56]DASGNK[UNIMOD:56]VK[UNIMOD:56]AEPAK[UNIMOD:56]IEAFR.A	sp|P00558|PGK1_HUMAN
U87MG_100ug_NHS_Rep1_5Frac_Frac-4_SII_12895_1_12895_2_1	2.72732	4.41421e-05	1.78052e-11	R.K[UNIMOD:56]DLYANTVLSGGTTMYPGIADR.M	sp|P60709|ACTB_HUMAN
U87MG_100ug_NHS_Rep1_5Frac_Frac-4_SII_19373_1_19373_3_1	2.72609	4.41421e-05	1.79929e-11	R.[UNIMOD:56]STGEAFVQFASQEIAEK[UNIMOD:56]ALK[UNIMOD:56]K[UNIMOD:56]HK[UNIMOD:56]ER.I	sp|P55795|HNRH2_HUMAN
U87MG_100ug_NHS_Rep1_5Frac_Frac-4_SII_13229_1_13229_3_1	2.72111	4.41421e-05	1.87724e-11	R.FHVEEEGK[UNIMOD:56]GK[UNIMOD:56]DASGNK[UNIMOD:56]VK[UNIMOD:56]AEPAK[UNIMOD:56]IEAFR.A	sp|P00558|PGK1_HUMAN
U87MG_100ug_NHS_Rep1_5Frac_Frac-2_SII_14679_1_14679_3_1	2.72101	4.41421e-05	1.87889e-11	R.[UNIMOD:28][UNIMOD:56]QK[UNIMOD:56]ASIHEAWTDGK[UNIMOD:56]EAMLK[UNIMOD:56]HR.D	sp|O43707|ACTN4_HUMAN
U87MG_100ug_NHS_Rep1_5Frac_Frac-1_SII_22180_1_22180_3_1	2.71941	4.41421e-05	1.90463e-11	R.TNISDEESEQATEMLVHNAQNLMQSVK[UNIMOD:56]ETVR.E	sp|P18206|VINC_HUMAN
U87MG_100ug_NHS_Rep1_5Frac_Frac-4_SII_12813_1_12813_2_1	2.71897	4.41421e-05	1.91193e-11	R.K[UNIMOD:56]DLYANTVLSGGTTMYPGIADR.M	sp|P60709|ACTB_HUMAN
U87MG_100ug_NHS_Rep1_5Frac_Frac-1_SII_16645_1_16645_3_1	2.71598	4.41421e-05	1.96124e-11	R.K[UNIMOD:56]K[UNIMOD:56]LEMDLK[UNIMOD:56]DLEAHIDSANK[UNIMOD:56]NRDEAIK[UNIMOD:56]QLR.K	sp|P35579|MYH9_HUMAN
U87MG_100ug_NHS_Rep1_5Frac_Frac-5_SII_16913_1_16913_3_1	2.71446	4.41421e-05	1.98677e-11	R.K[UNIMOD:56]K[UNIMOD:56]AK[UNIMOD:56]VDEFPLC[UNIMOD:4]GHMVSDEYEQLSSEALEAAR.I	sp|P27635|RL10_HUMAN
U87MG_100ug_NHS_Rep1_5Frac_Frac-1_SII_18724_1_18724_3_1	2.71272	4.41421e-05	2.01652e-11	R.[UNIMOD:28]QK[UNIMOD:56]LSLSTK[UNIMOD:56]LK[UNIMOD:56]QVEDEK[UNIMOD:56]NSFR.E	sp|P35579|MYH9_HUMAN
U87MG_100ug_NHS_Rep1_5Frac_Frac-4_SII_19320_1_19320_3_1	2.71242	4.41421e-05	2.0216e-11	R.TLK[UNIMOD:56]LTTPTYGDLNHLVSATMSGVTTSLR.F	sp|Q9BUF5|TBB6_HUMAN
U87MG_100ug_NHS_Rep1_5Frac_Frac-1_SII_21808_1_21808_3_1	2.71101	4.41421e-05	2.0461e-11	R.DLVAIEAK[UNIMOD:56]LSDLQK[UNIMOD:56]EAEK[UNIMOD:56]LESEHPDQAQAILSR.L	sp|Q01082|SPTB2_HUMAN
U87MG_100ug_NHS_Rep1_5Frac_Frac-5_SII_8884_1_8884_3_1	2.70875	4.41421e-05	2.08592e-11	-.[UNIMOD:56]PEPSK[UNIMOD:56]SAPAPK[UNIMOD:56]K[UNIMOD:56]GSK[UNIMOD:56]K[UNIMOD:56]AVTK[UNIMOD:56]AQK[UNIMOD:56]K[UNIMOD:56]DGK[UNIMOD:56]K[UNIMOD:56]R.K	sp|Q99877|H2B1N_HUMAN
U87MG_100ug_NHS_Rep1_5Frac_Frac-2_SII_16811_1_16811_3_1	2.70811	4.41421e-05	2.09718e-11	-.[UNIMOD:1]AEMGSK[UNIMOD:56]GVTAGK[UNIMOD:56]IASNVQK[UNIMOD:56]K[UNIMOD:56]LTR.A	sp|O00499|BIN1_HUMAN
U87MG_100ug_NHS_Rep1_5Frac_Frac-2_SII_11256_1_11256_3_1	2.70086	4.41421e-05	2.23101e-11	R.[UNIMOD:28][UNIMOD:56]QK[UNIMOD:56]ASIHEAWTDGK[UNIMOD:56]EAMLK[UNIMOD:56]HR.D	sp|O43707|ACTN4_HUMAN
U87MG_100ug_NHS_Rep1_5Frac_Frac-5_SII_6037_1_6037_3_1	2.70058	4.41421e-05	2.23628e-11	R.TQK[UNIMOD:56]TGGADQSLQQGEGSK[UNIMOD:56]K[UNIMOD:56]GK[UNIMOD:56]GK[UNIMOD:56]K[UNIMOD:56]K[UNIMOD:56]K[UNIMOD:56].-	sp|P09132|SRP19_HUMAN
U87MG_100ug_NHS_Rep1_5Frac_Frac-2_SII_14941_1_14941_3_1	2.69963	4.41421e-05	2.25449e-11	R.TEMEDLMSSK[UNIMOD:56]DDVGK[UNIMOD:56]SVHELEK[UNIMOD:56]SK[UNIMOD:56]R.A	sp|P35579|MYH9_HUMAN
U87MG_100ug_NHS_Rep1_5Frac_Frac-4_SII_21674_1_21674_3_1	2.69841	4.41421e-05	2.27794e-11	R.[UNIMOD:56]SGVSLAALK[UNIMOD:56]K[UNIMOD:56]ALAAAGYDVEK[UNIMOD:56]NNSR.I	sp|P16403|H12_HUMAN
U87MG_100ug_NHS_Rep1_5Frac_Frac-4_SII_11631_1_11631_3_1	2.69835	4.41421e-05	2.27917e-11	R.FHVEEEGK[UNIMOD:56]GK[UNIMOD:56]DASGNK[UNIMOD:56]VK[UNIMOD:56]AEPAK[UNIMOD:56]IEAFR.A	sp|P00558|PGK1_HUMAN
U87MG_100ug_NHS_Rep1_5Frac_Frac-1_SII_12788_1_12788_3_1	2.69774	4.41421e-05	2.29109e-11	R.K[UNIMOD:56]K[UNIMOD:56]EIEELQSQAQALSQEGK[UNIMOD:56]STDEVDSK[UNIMOD:56]R.L	sp|Q01082|SPTB2_HUMAN
U87MG_100ug_NHS_Rep1_5Frac_Frac-3_SII_18843_1_18843_3_1	2.69621	4.41421e-05	2.32117e-11	C.[UNIMOD:27]EQALAAEPK[UNIMOD:56]AK[UNIMOD:56]DPFAHLPK[UNIMOD:56]STFVLDEFK[UNIMOD:56]R.K	sp|P26641|EF1G_HUMAN
U87MG_100ug_NHS_Rep1_5Frac_Frac-2_SII_14515_1_14515_3_1	2.69127	4.41421e-05	2.42095e-11	R.[UNIMOD:56]VHVSEEGTEPEAMLQVLGPK[UNIMOD:56]PALPAGTEDTAK[UNIMOD:56]EDAANR.K	sp|P06396|GELS_HUMAN
U87MG_100ug_NHS_Rep1_5Frac_Frac-3_SII_16452_1_16452_4_1	2.68784	4.41421e-05	2.49274e-11	-.[UNIMOD:1]SK[UNIMOD:56]PHSEAGTAFIQTQQLHAAMADTFLEHMC[UNIMOD:4]R.L	sp|P14618|KPYM_HUMAN
U87MG_100ug_NHS_Rep1_5Frac_Frac-4_SII_14459_1_14459_3_1	2.68779	4.41421e-05	2.49391e-11	R.DGEDQTQDTELVETRPAGDGTFQK[UNIMOD:56]WAAVVVPSGQEQR.Y	sp|P10321|1C07_HUMAN
U87MG_100ug_NHS_Rep1_5Frac_Frac-2_SII_18582_1_18582_3_1	2.68748	4.41421e-05	2.50041e-11	R.[UNIMOD:28]QK[UNIMOD:56]LSLSTK[UNIMOD:56]LK[UNIMOD:56]QVEDEK[UNIMOD:56]NSFR.E	sp|P35579|MYH9_HUMAN
U87MG_100ug_NHS_Rep1_5Frac_Frac-2_SII_20583_1_20583_3_1	2.68524	4.41421e-05	2.54851e-11	R.[UNIMOD:56]TVEVEK[UNIMOD:56]VHLEK[UNIMOD:56]K[UNIMOD:56]LRDEINLAK[UNIMOD:56]QEAQR.L	sp|Q13586|STIM1_HUMAN
U87MG_100ug_NHS_Rep1_5Frac_Frac-4_SII_12231_1_12231_3_1	2.68495	4.41421e-05	2.55495e-11	R.FHVEEEGK[UNIMOD:56]GK[UNIMOD:56]DASGNK[UNIMOD:56]VK[UNIMOD:56]AEPAK[UNIMOD:56]IEAFR.A	sp|P00558|PGK1_HUMAN
U87MG_100ug_NHS_Rep1_5Frac_Frac-1_SII_12391_1_12391_2_1	2.68323	4.41421e-05	2.59268e-11	R.[UNIMOD:28]QK[UNIMOD:56]QAADAEMEK[UNIMOD:56]HK[UNIMOD:56]K[UNIMOD:56]FAEQTLR.Q	sp|Q15149|PLEC_HUMAN
U87MG_100ug_NHS_Rep1_5Frac_Frac-5_SII_22036_1_22036_3_1	2.68245	4.41421e-05	2.6099e-11	-.[UNIMOD:56]MK[UNIMOD:56]PLVVFVLGGPGAGK[UNIMOD:56]GTQC[UNIMOD:4]AR.I	sp|P30085|KCY_HUMAN
U87MG_100ug_NHS_Rep1_5Frac_Frac-5_SII_17021_1_17021_3_1	2.68211	4.41421e-05	2.61744e-11	R.LYDLDK[UNIMOD:56]DEK[UNIMOD:56]ISRDELLQVLR.M	sp|Q99653|CHP1_HUMAN
U87MG_100ug_NHS_Rep1_5Frac_Frac-2_SII_14442_1_14442_3_1	2.68017	4.41421e-05	2.6612e-11	R.[UNIMOD:56]VHVSEEGTEPEAMLQVLGPK[UNIMOD:56]PALPAGTEDTAK[UNIMOD:56]EDAANR.K	sp|P06396|GELS_HUMAN
U87MG_100ug_NHS_Rep1_5Frac_Frac-2_SII_14046_1_14046_2_1	2.6793	4.41421e-05	2.68106e-11	R.[UNIMOD:28]QK[UNIMOD:56]HSQAVEELAEQLEQTK[UNIMOD:56]R.V	sp|P35579|MYH9_HUMAN
U87MG_100ug_NHS_Rep1_5Frac_Frac-5_SII_20012_1_20012_3_1	2.67815	4.41421e-05	2.70744e-11	-.[UNIMOD:1]ASGVAVSDGVIK[UNIMOD:56]VFNDMK[UNIMOD:56]VR.K	sp|P23528|COF1_HUMAN
U87MG_100ug_NHS_Rep1_5Frac_Frac-4_SII_18946_1_18946_3_1	2.67794	4.41421e-05	2.71227e-11	R.TLK[UNIMOD:56]LTTPTYGDLNHLVSATMSGVTTC[UNIMOD:4]LR.F	sp|P07437|TBB5_HUMAN
U87MG_100ug_NHS_Rep1_5Frac_Frac-5_SII_6435_1_6435_3_1	2.6772	4.41421e-05	2.72933e-11	R.GQTPK[UNIMOD:56]VAK[UNIMOD:56]QEK[UNIMOD:56]K[UNIMOD:56]K[UNIMOD:56]K[UNIMOD:56]K[UNIMOD:56]TGR.A	sp|P62861|RS30_HUMAN
U87MG_100ug_NHS_Rep1_5Frac_Frac-1_SII_18838_1_18838_3_1	2.67596	4.41421e-05	2.75826e-11	R.[UNIMOD:28]QK[UNIMOD:56]LSLSTK[UNIMOD:56]LK[UNIMOD:56]QVEDEK[UNIMOD:56]NSFR.E	sp|P35579|MYH9_HUMAN
U87MG_100ug_NHS_Rep1_5Frac_Frac-5_SII_6422_1_6422_3_1	2.67578	4.41421e-05	2.76259e-11	R.TLVVHEK[UNIMOD:56]ADDLGK[UNIMOD:56]GGNEESTK[UNIMOD:56]TGNAGSR.L	sp|P00441|SODC_HUMAN
U87MG_100ug_NHS_Rep1_5Frac_Frac-4_SII_18750_1_18750_3_1	2.67528	4.41421e-05	2.77437e-11	R.K[UNIMOD:56]DGNASGTTLLEALDC[UNIMOD:4]ILPPTRPTDK[UNIMOD:56]PLR.L	sp|P68104|EF1A1_HUMAN
U87MG_100ug_NHS_Rep1_5Frac_Frac-3_SII_16020_1_16020_2_1	2.6747	4.41421e-05	2.78803e-11	-.[UNIMOD:1]DDDIAALVVDNGSGMC[UNIMOD:4]K[UNIMOD:56]AGFAGDDAPR.A	sp|P60709|ACTB_HUMAN
U87MG_100ug_NHS_Rep1_5Frac_Frac-4_SII_11398_1_11398_3_1	2.67373	4.41421e-05	2.81118e-11	R.FHVEEEGK[UNIMOD:56]GK[UNIMOD:56]DASGNK[UNIMOD:56]VK[UNIMOD:56]AEPAK[UNIMOD:56]IEAFR.A	sp|P00558|PGK1_HUMAN
U87MG_100ug_NHS_Rep1_5Frac_Frac-1_SII_11269_1_11269_3_1	2.67341	4.41421e-05	2.81889e-11	R.FHVEEEGK[UNIMOD:56]GK[UNIMOD:56]DASGNK[UNIMOD:56]VK[UNIMOD:56]AEPAK[UNIMOD:56]IEAFR.A	sp|P00558|PGK1_HUMAN
U87MG_100ug_NHS_Rep1_5Frac_Frac-1_SII_18769_1_18769_3_1	2.67234	4.41421e-05	2.84483e-11	R.[UNIMOD:28]QK[UNIMOD:56]LSLSTK[UNIMOD:56]LK[UNIMOD:56]QVEDEK[UNIMOD:56]NSFR.E	sp|P35579|MYH9_HUMAN
U87MG_100ug_NHS_Rep1_5Frac_Frac-1_SII_16122_1_16122_4_1	2.67118	4.41421e-05	2.87297e-11	-.[UNIMOD:1]SK[UNIMOD:56]PHSEAGTAFIQTQQLHAAMADTFLEHMC[UNIMOD:4]R.L	sp|P14618|KPYM_HUMAN
U87MG_100ug_NHS_Rep1_5Frac_Frac-1_SII_15968_1_15968_3_1	2.67007	4.41421e-05	2.90041e-11	R.EQEVNILK[UNIMOD:56]K[UNIMOD:56]TLEEEAK[UNIMOD:56]THEAQIQEM[UNIMOD:35]R.Q	sp|P35579|MYH9_HUMAN
U87MG_100ug_NHS_Rep1_5Frac_Frac-1_SII_16674_1_16674_3_1	2.66822	4.41421e-05	2.94652e-11	R.K[UNIMOD:56]K[UNIMOD:56]LEMDLK[UNIMOD:56]DLEAHIDSANK[UNIMOD:56]NRDEAIK[UNIMOD:56]QLR.K	sp|P35579|MYH9_HUMAN
U87MG_100ug_NHS_Rep1_5Frac_Frac-2_SII_18400_1_18400_3_1	2.66726	4.41421e-05	2.97056e-11	R.[UNIMOD:56]SNTGGQAFPQC[UNIMOD:4]VFDHWQILPGDPFDNSSRPSQVVAETR.K	sp|P13639|EF2_HUMAN
U87MG_100ug_NHS_Rep1_5Frac_Frac-3_SII_11167_1_11167_3_1	2.6672	4.41421e-05	2.97208e-11	R.FHVEEEGK[UNIMOD:56]GK[UNIMOD:56]DASGNK[UNIMOD:56]VK[UNIMOD:56]AEPAK[UNIMOD:56]IEAFR.A	sp|P00558|PGK1_HUMAN
U87MG_100ug_NHS_Rep1_5Frac_Frac-1_SII_15914_1_15914_4_1	2.66688	4.41421e-05	2.98039e-11	-.[UNIMOD:1]SK[UNIMOD:56]PHSEAGTAFIQTQQLHAAMADTFLEHMC[UNIMOD:4]R.L	sp|P14618|KPYM_HUMAN
U87MG_100ug_NHS_Rep1_5Frac_Frac-2_SII_8933_1_8933_3_1	2.66669	4.41421e-05	2.9852e-11	-.[UNIMOD:56]PEPAK[UNIMOD:56]SAPAPK[UNIMOD:56]K[UNIMOD:56]GSK[UNIMOD:56]K[UNIMOD:56]AVTK[UNIMOD:56]AQK[UNIMOD:56]K[UNIMOD:56]DGK[UNIMOD:56]K[UNIMOD:56]R.K	sp|P62807|H2B1C_HUMAN
U87MG_100ug_NHS_Rep1_5Frac_Frac-4_SII_13459_1_13459_3_1	2.65985	4.41421e-05	3.1642e-11	R.FHVEEEGK[UNIMOD:56]GK[UNIMOD:56]DASGNK[UNIMOD:56]VK[UNIMOD:56]AEPAK[UNIMOD:56]IEAFR.A	sp|P00558|PGK1_HUMAN
U87MG_100ug_NHS_Rep1_5Frac_Frac-3_SII_14214_1_14214_3_1	2.65953	4.41421e-05	3.17285e-11	R.NTTIPTK[UNIMOD:56]QTQTFTTYSDNQPGVLIQVYEGER.A	sp|P11142|HSP7C_HUMAN
U87MG_100ug_NHS_Rep1_5Frac_Frac-1_SII_17669_1_17669_3_1	2.65857	4.41421e-05	3.19912e-11	R.C[UNIMOD:4]QHLQAEK[UNIMOD:56]K[UNIMOD:56]K[UNIMOD:56]MQQNIQELEEQLEEEESAR.Q	sp|P35579|MYH9_HUMAN
U87MG_100ug_NHS_Rep1_5Frac_Frac-4_SII_13692_1_13692_3_1	2.65822	4.41421e-05	3.20849e-11	R.FHVEEEGK[UNIMOD:56]GK[UNIMOD:56]DASGNK[UNIMOD:56]VK[UNIMOD:56]AEPAK[UNIMOD:56]IEAFR.A	sp|P00558|PGK1_HUMAN
U87MG_100ug_NHS_Rep1_5Frac_Frac-2_SII_15162_1_15162_3_1	2.65546	4.41421e-05	3.28501e-11	-.[UNIMOD:56]PALPLDQLQITHK[UNIMOD:56]DPK[UNIMOD:56]TGK[UNIMOD:56]LR.T	sp|Q9H1I8|ASCC2_HUMAN
U87MG_100ug_NHS_Rep1_5Frac_Frac-5_SII_7189_1_7189_3_1	2.65316	4.41421e-05	3.34985e-11	R.VVSSIEQK[UNIMOD:56]TEGAEK[UNIMOD:56]K[UNIMOD:56]QQM[UNIMOD:35]AR.E	sp|P63104|1433Z_HUMAN
U87MG_100ug_NHS_Rep1_5Frac_Frac-4_SII_17302_1_17302_2_1	2.64997	4.41421e-05	3.4422e-11	R.EDLVVAPAGITLK[UNIMOD:56]EANEILQR.S	sp|P12268|IMDH2_HUMAN
U87MG_100ug_NHS_Rep1_5Frac_Frac-1_SII_12065_1_12065_2_1	2.64924	4.41421e-05	3.46363e-11	R.[UNIMOD:56]FVPQEMGPHTVAVK[UNIMOD:56]YR.G	sp|Q14315|FLNC_HUMAN
U87MG_100ug_NHS_Rep1_5Frac_Frac-2_SII_11298_1_11298_3_1	2.64903	4.41421e-05	3.47006e-11	R.[UNIMOD:28][UNIMOD:56]QK[UNIMOD:56]ASIHEAWTDGK[UNIMOD:56]EAMLK[UNIMOD:56]HR.D	sp|O43707|ACTN4_HUMAN
U87MG_100ug_NHS_Rep1_5Frac_Frac-4_SII_14188_1_14188_3_1	2.64878	4.41421e-05	3.47742e-11	R.AQK[UNIMOD:56]DEEK[UNIMOD:56]MEIQEIQLK[UNIMOD:56]EAK[UNIMOD:56]HIAEDADR.K	sp|P09493|TPM1_HUMAN
U87MG_100ug_NHS_Rep1_5Frac_Frac-2_SII_22010_1_22010_3_1	2.64718	4.41421e-05	3.5252e-11	R.[UNIMOD:56]AVHANPPTLLLPVAHMLEVGDPDDLAFLR.K	sp|Q13724|MOGS_HUMAN
U87MG_100ug_NHS_Rep1_5Frac_Frac-3_SII_20595_1_20595_3_1	2.64464	4.41421e-05	3.60221e-11	R.[UNIMOD:56]TVEVEK[UNIMOD:56]VHLEK[UNIMOD:56]K[UNIMOD:56]LRDEINLAK[UNIMOD:56]QEAQR.L	sp|Q13586|STIM1_HUMAN
U87MG_100ug_NHS_Rep1_5Frac_Frac-1_SII_13896_1_13896_4_1	2.64421	4.41421e-05	3.6156e-11	-.[UNIMOD:1]SK[UNIMOD:56]PHSEAGTAFIQTQQLHAAMADTFLEHM[UNIMOD:35]C[UNIMOD:4]R.L	sp|P14618|KPYM_HUMAN
U87MG_100ug_NHS_Rep1_5Frac_Frac-5_SII_21332_1_21332_3_1	2.64367	4.41421e-05	3.63212e-11	R.DFVAEPMGEK[UNIMOD:56]PVGSLAGIGEVLGK[UNIMOD:56]K[UNIMOD:56]LEER.G	sp|O75531|BAF_HUMAN
U87MG_100ug_NHS_Rep1_5Frac_Frac-5_SII_20232_1_20232_3_1	2.64199	4.41421e-05	3.68464e-11	-.[UNIMOD:1]ASGVAVSDGVIK[UNIMOD:56]VFNDMK[UNIMOD:56]VR.K	sp|P23528|COF1_HUMAN
U87MG_100ug_NHS_Rep1_5Frac_Frac-3_SII_16539_1_16539_4_1	2.64066	4.41421e-05	3.72647e-11	-.[UNIMOD:1]SK[UNIMOD:56]PHSEAGTAFIQTQQLHAAMADTFLEHMC[UNIMOD:4]R.L	sp|P14618|KPYM_HUMAN
U87MG_100ug_NHS_Rep1_5Frac_Frac-5_SII_16822_1_16822_3_1	2.63858	4.41421e-05	3.79329e-11	-.[UNIMOD:1]SNPFLK[UNIMOD:56]QVFNK[UNIMOD:56]DK[UNIMOD:56]TFRPK[UNIMOD:56]R.K	sp|Q96BX8|MOB3A_HUMAN
U87MG_100ug_NHS_Rep1_5Frac_Frac-1_SII_11346_1_11346_3_1	2.63617	4.41421e-05	3.87188e-11	R.FHVEEEGK[UNIMOD:56]GK[UNIMOD:56]DASGNK[UNIMOD:56]VK[UNIMOD:56]AEPAK[UNIMOD:56]IEAFR.A	sp|P00558|PGK1_HUMAN
U87MG_100ug_NHS_Rep1_5Frac_Frac-1_SII_15760_1_15760_3_1	2.63561	4.41421e-05	3.89049e-11	-.[UNIMOD:1]SK[UNIMOD:56]PHSEAGTAFIQTQQLHAAMADTFLEHMC[UNIMOD:4]R.L	sp|P14618|KPYM_HUMAN
U87MG_100ug_NHS_Rep1_5Frac_Frac-1_SII_22909_1_22909_3_1	2.63485	4.41421e-05	3.91586e-11	R.[UNIMOD:56]SNPK[UNIMOD:56]IWNVHSVLNVLHSLVDK[UNIMOD:56]SNINR.Q	sp|Q9Y262|EIF3L_HUMAN
U87MG_100ug_NHS_Rep1_5Frac_Frac-3_SII_16874_1_16874_3_1	2.63474	4.41421e-05	3.91944e-11	-.[UNIMOD:1]AEMGSK[UNIMOD:56]GVTAGK[UNIMOD:56]IASNVQK[UNIMOD:56]K[UNIMOD:56]LTR.A	sp|O00499|BIN1_HUMAN
U87MG_100ug_NHS_Rep1_5Frac_Frac-3_SII_12984_1_12984_2_1	2.63451	4.41421e-05	3.92695e-11	L.[UNIMOD:27]EHSDC[UNIMOD:4]AFMVDNEAIYDIC[UNIMOD:4]R.R	sp|P68363|TBA1B_HUMAN
U87MG_100ug_NHS_Rep1_5Frac_Frac-1_SII_17452_1_17452_4_1	2.63317	4.41421e-05	3.97222e-11	R.IAEFTTNLTEEEEK[UNIMOD:56]SK[UNIMOD:56]SLAK[UNIMOD:56]LK[UNIMOD:56]NK[UNIMOD:56]HEAMITDLEER.L	sp|P35579|MYH9_HUMAN
U87MG_100ug_NHS_Rep1_5Frac_Frac-2_SII_16668_1_16668_3_1	2.62978	4.41421e-05	4.08845e-11	S.[UNIMOD:27]EAGTAFIQTQQLHAAMADTFLEHMC[UNIMOD:4]R.L	sp|P14618|KPYM_HUMAN
U87MG_100ug_NHS_Rep1_5Frac_Frac-1_SII_15161_1_15161_3_1	2.62956	4.41421e-05	4.09636e-11	R.TEMEDLMSSK[UNIMOD:56]DDVGK[UNIMOD:56]SVHELEK[UNIMOD:56]SK[UNIMOD:56]R.A	sp|P35579|MYH9_HUMAN
U87MG_100ug_NHS_Rep1_5Frac_Frac-5_SII_20891_1_20891_3_1	2.6293	4.41421e-05	4.10552e-11	-.[UNIMOD:1]ASGVAVSDGVIK[UNIMOD:56]VFNDMK[UNIMOD:56]VR.K	sp|P23528|COF1_HUMAN
U87MG_100ug_NHS_Rep1_5Frac_Frac-4_SII_11565_1_11565_3_1	2.62664	4.41421e-05	4.19959e-11	R.FHVEEEGK[UNIMOD:56]GK[UNIMOD:56]DASGNK[UNIMOD:56]VK[UNIMOD:56]AEPAK[UNIMOD:56]IEAFR.A	sp|P00558|PGK1_HUMAN
U87MG_100ug_NHS_Rep1_5Frac_Frac-3_SII_4891_1_4891_3_1	2.62609	4.41421e-05	4.21936e-11	-.[UNIMOD:1]MDFQHRPGGK[UNIMOD:56]TGSGGVASSSESNR.D	sp|Q15428|SF3A2_HUMAN
U87MG_100ug_NHS_Rep1_5Frac_Frac-1_SII_21839_1_21839_3_1	2.6254	4.41421e-05	4.2441e-11	R.[UNIMOD:56]SGVSLAALK[UNIMOD:56]K[UNIMOD:56]ALAAAGYDVEK[UNIMOD:56]NNSR.I	sp|P16403|H12_HUMAN
U87MG_100ug_NHS_Rep1_5Frac_Frac-4_SII_16583_1_16583_3_1	2.62444	4.41421e-05	4.27883e-11	S.[UNIMOD:27]EAGTAFIQTQQLHAAMADTFLEHMC[UNIMOD:4]R.L	sp|P14618|KPYM_HUMAN
U87MG_100ug_NHS_Rep1_5Frac_Frac-1_SII_11401_1_11401_4_1	2.62405	4.41421e-05	4.29325e-11	R.LQAEEVAQQK[UNIMOD:56]SLAQAEAEK[UNIMOD:56]QK[UNIMOD:56]EEAER.E	sp|Q15149|PLEC_HUMAN
U87MG_100ug_NHS_Rep1_5Frac_Frac-2_SII_20061_1_20061_3_1	2.62308	4.41421e-05	4.32874e-11	R.DHSGTLGPEEFK[UNIMOD:56]AC[UNIMOD:4]LISLGYDIGNDPQGEAEFAR.I	sp|P12814|ACTN1_HUMAN
U87MG_100ug_NHS_Rep1_5Frac_Frac-1_SII_15880_1_15880_4_1	2.62226	4.41421e-05	4.3591e-11	-.[UNIMOD:1]SK[UNIMOD:56]PHSEAGTAFIQTQQLHAAMADTFLEHMC[UNIMOD:4]R.L	sp|P14618|KPYM_HUMAN
U87MG_100ug_NHS_Rep1_5Frac_Frac-4_SII_19274_1_19274_3_1	2.62109	4.41421e-05	4.40291e-11	-.[UNIMOD:1]ATNFLAHEK[UNIMOD:56]IWFDK[UNIMOD:56]FK[UNIMOD:56]YDDAERR.F	sp|P29692|EF1D_HUMAN
U87MG_100ug_NHS_Rep1_5Frac_Frac-4_SII_12525_1_12525_3_1	2.62023	4.41421e-05	4.43548e-11	R.FHVEEEGK[UNIMOD:56]GK[UNIMOD:56]DASGNK[UNIMOD:56]VK[UNIMOD:56]AEPAK[UNIMOD:56]IEAFR.A	sp|P00558|PGK1_HUMAN
U87MG_100ug_NHS_Rep1_5Frac_Frac-3_SII_2721_1_2721_2_1	2.61983	4.41421e-05	4.45037e-11	R.SHENK[UNIMOD:56]SVAQQASLTEQR.L	sp|P52306|GDS1_HUMAN
U87MG_100ug_NHS_Rep1_5Frac_Frac-1_SII_12813_1_12813_3_1	2.61939	4.41421e-05	4.46713e-11	R.K[UNIMOD:56]K[UNIMOD:56]EIEELQSQAQALSQEGK[UNIMOD:56]STDEVDSK[UNIMOD:56]R.L	sp|Q01082|SPTB2_HUMAN
U87MG_100ug_NHS_Rep1_5Frac_Frac-1_SII_10289_1_10289_3_1	2.61875	4.41421e-05	4.4916e-11	-.PEPTK[UNIMOD:56]SAPAPK[UNIMOD:56]K[UNIMOD:56]GSK[UNIMOD:56]K[UNIMOD:56]AVTK[UNIMOD:56]AQK[UNIMOD:56]K[UNIMOD:56]DGK[UNIMOD:56]K[UNIMOD:56]R.K	sp|P58876|H2B1D_HUMAN
U87MG_100ug_NHS_Rep1_5Frac_Frac-1_SII_22234_1_22234_3_1	2.6161	4.41421e-05	4.59433e-11	R.[UNIMOD:56]LLEMNLMHAPQVADAILGNQMFTHYDR.A	sp|Q00610|CLH1_HUMAN
U87MG_100ug_NHS_Rep1_5Frac_Frac-2_SII_16539_1_16539_2_1	2.61563	4.41421e-05	4.61249e-11	R.ETVVEVPQVTWEDIGGLEDVK[UNIMOD:56]R.E	sp|P55072|TERA_HUMAN
U87MG_100ug_NHS_Rep1_5Frac_Frac-5_SII_9513_1_9513_3_1	2.61548	4.41421e-05	4.61847e-11	R.[UNIMOD:27]EEHK[UNIMOD:56]K[UNIMOD:56]K[UNIMOD:56]HPDASVNFSEFSK[UNIMOD:56]K[UNIMOD:56]C[UNIMOD:4]SER.W	sp|P09429|HMGB1_HUMAN
U87MG_100ug_NHS_Rep1_5Frac_Frac-3_SII_18788_1_18788_3_1	2.61503	4.41421e-05	4.63622e-11	-.[UNIMOD:1]ASMGTLAFDEYGRPFLIIK[UNIMOD:56]DQDR.K	sp|P48643|TCPE_HUMAN
U87MG_100ug_NHS_Rep1_5Frac_Frac-1_SII_16637_1_16637_4_1	2.61072	4.41421e-05	4.80964e-11	-.[UNIMOD:1]SK[UNIMOD:56]PHSEAGTAFIQTQQLHAAMADTFLEHMC[UNIMOD:4]R.L	sp|P14618|KPYM_HUMAN
U87MG_100ug_NHS_Rep1_5Frac_Frac-4_SII_19175_1_19175_3_1	2.61013	4.41421e-05	4.834e-11	-.[UNIMOD:1]ATNFLAHEK[UNIMOD:56]IWFDK[UNIMOD:56]FK[UNIMOD:56]YDDAERR.F	sp|P29692|EF1D_HUMAN
U87MG_100ug_NHS_Rep1_5Frac_Frac-3_SII_8003_1_8003_3_1	2.60888	4.41421e-05	4.88564e-11	R.FDPDSK[UNIMOD:56]K[UNIMOD:56]AK[UNIMOD:56]EC[UNIMOD:4]EPPSAGAAVTARPGQEIR.Q	sp|Q9C0E8|LNP_HUMAN
U87MG_100ug_NHS_Rep1_5Frac_Frac-2_SII_16712_1_16712_3_1	2.60851	4.41421e-05	4.90129e-11	S.[UNIMOD:27]EAGTAFIQTQQLHAAMADTFLEHMC[UNIMOD:4]R.L	sp|P14618|KPYM_HUMAN
U87MG_100ug_NHS_Rep1_5Frac_Frac-5_SII_18786_1_18786_3_1	2.60541	4.41421e-05	5.03224e-11	R.K[UNIMOD:56]DGNASGTTLLEALDC[UNIMOD:4]ILPPTRPTDK[UNIMOD:56]PLR.L	sp|P68104|EF1A1_HUMAN
U87MG_100ug_NHS_Rep1_5Frac_Frac-1_SII_15178_1_15178_3_1	2.60524	4.41421e-05	5.03985e-11	R.K[UNIMOD:56]DGNASGTTLLEALDC[UNIMOD:4]ILPPTRPTDK[UNIMOD:56]PLR.L	sp|P68104|EF1A1_HUMAN
U87MG_100ug_NHS_Rep1_5Frac_Frac-3_SII_15192_1_15192_3_1	2.60517	4.41421e-05	5.04253e-11	R.NQDGK[UNIMOD:56]ITVDELK[UNIMOD:56]LK[UNIMOD:56]SDEDEERVHEEL.-	sp|Q96AY3|FKB10_HUMAN
U87MG_100ug_NHS_Rep1_5Frac_Frac-4_SII_19332_1_19332_3_1	2.60495	4.41421e-05	5.052e-11	-.[UNIMOD:1]ATNFLAHEK[UNIMOD:56]IWFDK[UNIMOD:56]FK[UNIMOD:56]YDDAERR.F	sp|P29692|EF1D_HUMAN
U87MG_100ug_NHS_Rep1_5Frac_Frac-3_SII_16054_1_16054_3_1	2.60424	4.41421e-05	5.083e-11	R.TATESFASDPILYRPVAVALDTK[UNIMOD:56]GPEIR.T	sp|P14618|KPYM_HUMAN
U87MG_100ug_NHS_Rep1_5Frac_Frac-1_SII_17157_1_17157_3_1	2.603	4.41421e-05	5.13674e-11	-.[UNIMOD:1]SIGVPIK[UNIMOD:56]VLHEAEGHIVTC[UNIMOD:4]ETNTGEVYR.G	sp|P62318|SMD3_HUMAN
U87MG_100ug_NHS_Rep1_5Frac_Frac-3_SII_19462_1_19462_3_1	2.60152	4.41421e-05	5.20227e-11	R.[UNIMOD:56]STGEAFVQFASQEIAEK[UNIMOD:56]ALK[UNIMOD:56]K[UNIMOD:56]HK[UNIMOD:56]ER.I	sp|P55795|HNRH2_HUMAN
U87MG_100ug_NHS_Rep1_5Frac_Frac-1_SII_14297_1_14297_3_1	2.59942	4.41421e-05	5.29616e-11	-.[UNIMOD:1]VSVINTVDTSHEDMIHDAQMDYYGTR.L	sp|P55735|SEC13_HUMAN
U87MG_100ug_NHS_Rep1_5Frac_Frac-1_SII_14910_1_14910_3_1	2.59786	4.41421e-05	5.3668e-11	R.TATESFASDPILYRPVAVALDTK[UNIMOD:56]GPEIR.T	sp|P14618|KPYM_HUMAN
U87MG_100ug_NHS_Rep1_5Frac_Frac-1_SII_20374_1_20374_3_1	2.59669	4.41421e-05	5.42072e-11	R.[UNIMOD:28]QSAC[UNIMOD:4]NLEK[UNIMOD:56]K[UNIMOD:56]QK[UNIMOD:56]K[UNIMOD:56]FDQLLAEEK[UNIMOD:56]TISAK[UNIMOD:56]YAEER.D	sp|P35579|MYH9_HUMAN
U87MG_100ug_NHS_Rep1_5Frac_Frac-4_SII_11503_1_11503_3_1	2.59379	4.41421e-05	5.5563e-11	R.FHVEEEGK[UNIMOD:56]GK[UNIMOD:56]DASGNK[UNIMOD:56]VK[UNIMOD:56]AEPAK[UNIMOD:56]IEAFR.A	sp|P00558|PGK1_HUMAN
U87MG_100ug_NHS_Rep1_5Frac_Frac-4_SII_13670_1_13670_3_1	2.59331	4.41421e-05	5.57919e-11	R.FHVEEEGK[UNIMOD:56]GK[UNIMOD:56]DASGNK[UNIMOD:56]VK[UNIMOD:56]AEPAK[UNIMOD:56]IEAFR.A	sp|P00558|PGK1_HUMAN
U87MG_100ug_NHS_Rep1_5Frac_Frac-2_SII_22772_1_22772_3_1	2.59254	4.41421e-05	5.61585e-11	R.[UNIMOD:56]GLK[UNIMOD:56]MASTFIGNSTAIQELFK[UNIMOD:56]R.I	sp|Q9BUF5|TBB6_HUMAN
U87MG_100ug_NHS_Rep1_5Frac_Frac-4_SII_8599_1_8599_3_1	2.5919	4.41421e-05	5.64646e-11	R.THMQDLK[UNIMOD:56]DVTNNVHYENYR.S	sp|Q16181|SEPT7_HUMAN
U87MG_100ug_NHS_Rep1_5Frac_Frac-1_SII_12716_1_12716_3_1	2.59153	4.41421e-05	5.66452e-11	R.VEDVLGK[UNIMOD:56]GWENHVEGQK[UNIMOD:56]LK[UNIMOD:56]QDGDSFR.M	sp|Q14204|DYHC1_HUMAN
U87MG_100ug_NHS_Rep1_5Frac_Frac-3_SII_14114_1_14114_3_1	2.59025	4.41421e-05	5.72656e-11	-.[UNIMOD:1]AAVQAAEVK[UNIMOD:56]VDGSEPK[UNIMOD:56]LSK[UNIMOD:56]NELK[UNIMOD:56]R.R	sp|Q15046|SYK_HUMAN
U87MG_100ug_NHS_Rep1_5Frac_Frac-4_SII_12702_1_12702_3_1	2.59	4.41421e-05	5.73894e-11	R.FHVEEEGK[UNIMOD:56]GK[UNIMOD:56]DASGNK[UNIMOD:56]VK[UNIMOD:56]AEPAK[UNIMOD:56]IEAFR.A	sp|P00558|PGK1_HUMAN
U87MG_100ug_NHS_Rep1_5Frac_Frac-3_SII_21155_1_21155_3_1	2.58997	4.41421e-05	5.7402e-11	-.[UNIMOD:1]TSK[UNIMOD:56]K[UNIMOD:56]LVNSVAGC[UNIMOD:4]ADDALAGLVAC[UNIMOD:4]NPNLQLLQGHR.V	sp|Q3LXA3|TKFC_HUMAN
U87MG_100ug_NHS_Rep1_5Frac_Frac-1_SII_16224_1_16224_4_1	2.58777	4.41421e-05	5.84893e-11	-.[UNIMOD:1]SK[UNIMOD:56]PHSEAGTAFIQTQQLHAAMADTFLEHMC[UNIMOD:4]R.L	sp|P14618|KPYM_HUMAN
U87MG_100ug_NHS_Rep1_5Frac_Frac-5_SII_18808_1_18808_3_1	2.58776	4.41421e-05	5.84952e-11	R.K[UNIMOD:56]DGNASGTTLLEALDC[UNIMOD:4]ILPPTRPTDK[UNIMOD:56]PLR.L	sp|P68104|EF1A1_HUMAN
U87MG_100ug_NHS_Rep1_5Frac_Frac-5_SII_21817_1_21817_3_1	2.58536	4.41421e-05	5.97044e-11	-.[UNIMOD:56]MK[UNIMOD:56]PLVVFVLGGPGAGK[UNIMOD:56]GTQC[UNIMOD:4]AR.I	sp|P30085|KCY_HUMAN
U87MG_100ug_NHS_Rep1_5Frac_Frac-3_SII_19118_1_19118_3_1	2.58383	4.41421e-05	6.04833e-11	R.TLK[UNIMOD:56]LTTPTYGDLNHLVSATMSGVTTC[UNIMOD:4]LR.F	sp|P07437|TBB5_HUMAN
U87MG_100ug_NHS_Rep1_5Frac_Frac-3_SII_16911_1_16911_3_1	2.58117	4.41421e-05	6.18728e-11	S.[UNIMOD:27]EAGTAFIQTQQLHAAMADTFLEHMC[UNIMOD:4]R.L	sp|P14618|KPYM_HUMAN
U87MG_100ug_NHS_Rep1_5Frac_Frac-3_SII_19753_1_19753_2_1	2.58116	4.41421e-05	6.18803e-11	R.NEK[UNIMOD:56]APVDFGYVGIDSILEQMR.R	sp|Q9UHD8|SEPT9_HUMAN
U87MG_100ug_NHS_Rep1_5Frac_Frac-1_SII_15068_1_15068_4_1	2.57963	4.41421e-05	6.26883e-11	R.TEMEDLMSSK[UNIMOD:56]DDVGK[UNIMOD:56]SVHELEK[UNIMOD:56]SK[UNIMOD:56]R.A	sp|P35579|MYH9_HUMAN
U87MG_100ug_NHS_Rep1_5Frac_Frac-4_SII_7782_1_7782_3_1	2.57928	4.41421e-05	6.28761e-11	R.[UNIMOD:56]SHTSEGAHLDITPNSGAAGNSAGPK[UNIMOD:56]SMEVSC[UNIMOD:4].-	sp|Q92597|NDRG1_HUMAN
U87MG_100ug_NHS_Rep1_5Frac_Frac-5_SII_21034_1_21034_3_1	2.57532	4.41421e-05	6.50362e-11	-.[UNIMOD:1]ASGVAVSDGVIK[UNIMOD:56]VFNDMK[UNIMOD:56]VR.K	sp|P23528|COF1_HUMAN
U87MG_100ug_NHS_Rep1_5Frac_Frac-5_SII_18142_1_18142_3_1	2.57244	4.41421e-05	6.66504e-11	R.[UNIMOD:28]QK[UNIMOD:56]DVK[UNIMOD:56]DGK[UNIMOD:56]YSQVLANGLDNK[UNIMOD:56]LREDLER.L	sp|P62269|RS18_HUMAN
U87MG_100ug_NHS_Rep1_5Frac_Frac-3_SII_20914_1_20914_3_1	2.57136	4.41421e-05	6.72675e-11	R.[UNIMOD:56]GLK[UNIMOD:56]MSSTFIGNSTAIQELFK[UNIMOD:56]R.I	sp|Q13509|TBB3_HUMAN
U87MG_100ug_NHS_Rep1_5Frac_Frac-1_SII_9191_1_9191_2_1	2.56927	4.41421e-05	6.84783e-11	R.HEEK[UNIMOD:56]VAAYDK[UNIMOD:56]LEK[UNIMOD:56]TK[UNIMOD:56]TR.L	sp|P35579|MYH9_HUMAN
U87MG_100ug_NHS_Rep1_5Frac_Frac-5_SII_17361_1_17361_3_1	2.56903	4.41421e-05	6.86186e-11	-.[UNIMOD:1]SDAAVDTSSEITTK[UNIMOD:56]DLK[UNIMOD:56]EK[UNIMOD:56]K[UNIMOD:56]EVVEEAENGR.D	sp|P06454|PTMA_HUMAN
U87MG_100ug_NHS_Rep1_5Frac_Frac-5_SII_21772_1_21772_3_1	2.56822	4.41421e-05	6.90921e-11	R.[UNIMOD:56]SGVSLAALK[UNIMOD:56]K[UNIMOD:56]ALAAAGYDVEK[UNIMOD:56]NNSR.I	sp|P16403|H12_HUMAN
U87MG_100ug_NHS_Rep1_5Frac_Frac-2_SII_11058_1_11058_3_1	2.56626	4.41421e-05	7.02571e-11	R.FHVEEEGK[UNIMOD:56]GK[UNIMOD:56]DASGNK[UNIMOD:56]VK[UNIMOD:56]AEPAK[UNIMOD:56]IEAFR.A	sp|P00558|PGK1_HUMAN
U87MG_100ug_NHS_Rep1_5Frac_Frac-4_SII_11607_1_11607_3_1	2.56479	4.41421e-05	7.11409e-11	R.EK[UNIMOD:56]LQEEMLQREEAENTLQSFR.Q	sp|P08670|VIME_HUMAN
U87MG_100ug_NHS_Rep1_5Frac_Frac-2_SII_15031_1_15031_3_1	2.56014	4.41421e-05	7.40189e-11	R.[UNIMOD:56]YESLTDPSK[UNIMOD:56]LDSGK[UNIMOD:56]ELHINLIPNK[UNIMOD:56]QDR.T	sp|P07900|HS90A_HUMAN
U87MG_100ug_NHS_Rep1_5Frac_Frac-2_SII_14052_1_14052_2_1	2.55986	4.41421e-05	7.41951e-11	R.[UNIMOD:28]QK[UNIMOD:56]HSQAVEELAEQLEQTK[UNIMOD:56]R.V	sp|P35579|MYH9_HUMAN
U87MG_100ug_NHS_Rep1_5Frac_Frac-5_SII_10993_1_10993_3_1	2.55956	4.41421e-05	7.43821e-11	R.AK[UNIMOD:56]C[UNIMOD:4]FEK[UNIMOD:56]NEAIQAAHDAVAQEGQC[UNIMOD:4]R.V	sp|P09936|UCHL1_HUMAN
U87MG_100ug_NHS_Rep1_5Frac_Frac-3_SII_16959_1_16959_3_1	2.5592	4.41421e-05	7.46161e-11	S.[UNIMOD:27]EAGTAFIQTQQLHAAMADTFLEHMC[UNIMOD:4]R.L	sp|P14618|KPYM_HUMAN
U87MG_100ug_NHS_Rep1_5Frac_Frac-3_SII_2751_1_2751_2_1	2.55865	4.41421e-05	7.49658e-11	R.SHENK[UNIMOD:56]SVAQQASLTEQR.L	sp|P52306|GDS1_HUMAN
U87MG_100ug_NHS_Rep1_5Frac_Frac-5_SII_7333_1_7333_3_1	2.55702	4.41421e-05	7.60101e-11	D.PAK[UNIMOD:56]SAPAPK[UNIMOD:56]K[UNIMOD:56]GSK[UNIMOD:56]K[UNIMOD:56]AVTK[UNIMOD:56]AQK[UNIMOD:56]K[UNIMOD:56]DGK[UNIMOD:56]K[UNIMOD:56]R.K	sp|P62807|H2B1C_HUMAN
U87MG_100ug_NHS_Rep1_5Frac_Frac-5_SII_18376_1_18376_2_1	2.55696	4.41421e-05	7.60519e-11	R.YSDESGNMDFDNFISC[UNIMOD:4]LVR.L	sp|P04632|CPNS1_HUMAN
U87MG_100ug_NHS_Rep1_5Frac_Frac-3_SII_16831_1_16831_3_1	2.5527	4.41421e-05	7.88646e-11	S.[UNIMOD:27]EAGTAFIQTQQLHAAMADTFLEHMC[UNIMOD:4]R.L	sp|P14618|KPYM_HUMAN
U87MG_100ug_NHS_Rep1_5Frac_Frac-1_SII_15899_1_15899_3_1	2.55088	4.41421e-05	8.00968e-11	R.K[UNIMOD:56]K[UNIMOD:56]LEMDLK[UNIMOD:56]DLEAHIDSANK[UNIMOD:56]NR.D	sp|P35579|MYH9_HUMAN
U87MG_100ug_NHS_Rep1_5Frac_Frac-4_SII_11898_1_11898_3_1	2.54861	4.41421e-05	8.16619e-11	R.FHVEEEGK[UNIMOD:56]GK[UNIMOD:56]DASGNK[UNIMOD:56]VK[UNIMOD:56]AEPAK[UNIMOD:56]IEAFR.A	sp|P00558|PGK1_HUMAN
U87MG_100ug_NHS_Rep1_5Frac_Frac-4_SII_11985_1_11985_3_1	2.54801	4.41421e-05	8.20763e-11	R.FHVEEEGK[UNIMOD:56]GK[UNIMOD:56]DASGNK[UNIMOD:56]VK[UNIMOD:56]AEPAK[UNIMOD:56]IEAFR.A	sp|P00558|PGK1_HUMAN
U87MG_100ug_NHS_Rep1_5Frac_Frac-3_SII_2765_1_2765_2_1	2.54753	4.41421e-05	8.24137e-11	R.SHENK[UNIMOD:56]SVAQQASLTEQR.L	sp|P52306|GDS1_HUMAN
U87MG_100ug_NHS_Rep1_5Frac_Frac-1_SII_16097_1_16097_4_1	2.54672	4.41421e-05	8.29838e-11	-.[UNIMOD:1]SK[UNIMOD:56]PHSEAGTAFIQTQQLHAAMADTFLEHMC[UNIMOD:4]R.L	sp|P14618|KPYM_HUMAN
U87MG_100ug_NHS_Rep1_5Frac_Frac-5_SII_21263_1_21263_3_1	2.54492	4.41421e-05	8.4273e-11	-.[UNIMOD:1]C[UNIMOD:4]DFTEDQTAEFK[UNIMOD:56]EAFQLFDR.T	sp|P60660|MYL6_HUMAN
U87MG_100ug_NHS_Rep1_5Frac_Frac-3_SII_22903_1_22903_3_1	2.54228	4.41421e-05	8.61893e-11	-.[UNIMOD:1]SAK[UNIMOD:56]AISEQTGK[UNIMOD:56]ELLYK[UNIMOD:56]FIC[UNIMOD:4]TTSAIQNR.F	sp|P53396|ACLY_HUMAN
U87MG_100ug_NHS_Rep1_5Frac_Frac-4_SII_12120_1_12120_3_1	2.54224	4.41421e-05	8.62168e-11	R.FHVEEEGK[UNIMOD:56]GK[UNIMOD:56]DASGNK[UNIMOD:56]VK[UNIMOD:56]AEPAK[UNIMOD:56]IEAFR.A	sp|P00558|PGK1_HUMAN
U87MG_100ug_NHS_Rep1_5Frac_Frac-2_SII_7113_1_7113_3_1	2.54071	4.41421e-05	8.73465e-11	G.[UNIMOD:27]EEK[UNIMOD:56]PIGAGEEK[UNIMOD:56]QK[UNIMOD:56]EGGK[UNIMOD:56]K[UNIMOD:56]K[UNIMOD:56]NK[UNIMOD:56]EGSGDGGR.A	sp|P26639|SYTC_HUMAN
U87MG_100ug_NHS_Rep1_5Frac_Frac-3_SII_11187_1_11187_3_1	2.53872	4.41421e-05	8.88395e-11	R.FHVEEEGK[UNIMOD:56]GK[UNIMOD:56]DASGNK[UNIMOD:56]VK[UNIMOD:56]AEPAK[UNIMOD:56]IEAFR.A	sp|P00558|PGK1_HUMAN
U87MG_100ug_NHS_Rep1_5Frac_Frac-4_SII_11333_1_11333_3_1	2.53702	4.41421e-05	9.01378e-11	R.FHVEEEGK[UNIMOD:56]GK[UNIMOD:56]DASGNK[UNIMOD:56]VK[UNIMOD:56]AEPAK[UNIMOD:56]IEAFR.A	sp|P00558|PGK1_HUMAN
U87MG_100ug_NHS_Rep1_5Frac_Frac-3_SII_11924_1_11924_3_1	2.53676	4.41421e-05	9.03387e-11	R.EK[UNIMOD:56]LQEEMLQREEAENTLQSFR.Q	sp|P08670|VIME_HUMAN
U87MG_100ug_NHS_Rep1_5Frac_Frac-5_SII_11242_1_11242_3_1	2.53606	4.41421e-05	9.08781e-11	-.[UNIMOD:56]PEPVK[UNIMOD:56]SAPVPK[UNIMOD:56]K[UNIMOD:56]GSK[UNIMOD:56]K[UNIMOD:56]AINK[UNIMOD:56]AQK[UNIMOD:56]K[UNIMOD:56]DGK[UNIMOD:56]K[UNIMOD:56]R.K	sp|Q99879|H2B1M_HUMAN
U87MG_100ug_NHS_Rep1_5Frac_Frac-4_SII_8888_1_8888_3_1	2.53573	4.41421e-05	9.11353e-11	-.[UNIMOD:56]PEPAK[UNIMOD:56]SAPAPK[UNIMOD:56]K[UNIMOD:56]GSK[UNIMOD:56]K[UNIMOD:56]AVTK[UNIMOD:56]AQK[UNIMOD:56]K[UNIMOD:56]DGK[UNIMOD:56]K[UNIMOD:56]R.K	sp|P62807|H2B1C_HUMAN
U87MG_100ug_NHS_Rep1_5Frac_Frac-4_SII_8976_1_8976_4_1	2.535	4.41421e-05	9.17022e-11	R.[UNIMOD:56]HQGVMVGMGQK[UNIMOD:56]DSYVGDEAQSK[UNIMOD:56]R.G	sp|P60709|ACTB_HUMAN
U87MG_100ug_NHS_Rep1_5Frac_Frac-5_SII_19191_1_19191_2_1	2.53096	4.41421e-05	9.49126e-11	R.K[UNIMOD:56]AMK[UNIMOD:56]GLGTDEESILTLLTSR.S	sp|P08758|ANXA5_HUMAN
U87MG_100ug_NHS_Rep1_5Frac_Frac-5_SII_17402_1_17402_3_1	2.53006	4.41421e-05	9.56491e-11	-.[UNIMOD:1]SIGVPIK[UNIMOD:56]VLHEAEGHIVTC[UNIMOD:4]ETNTGEVYR.G	sp|P62318|SMD3_HUMAN
U87MG_100ug_NHS_Rep1_5Frac_Frac-1_SII_16635_1_16635_3_1	2.52971	4.41421e-05	9.59307e-11	R.K[UNIMOD:56]K[UNIMOD:56]LEMDLK[UNIMOD:56]DLEAHIDSANK[UNIMOD:56]NRDEAIK[UNIMOD:56]QLR.K	sp|P35579|MYH9_HUMAN
U87MG_100ug_NHS_Rep1_5Frac_Frac-5_SII_11051_1_11051_3_1	2.52931	4.41421e-05	9.62573e-11	R.AK[UNIMOD:56]C[UNIMOD:4]FEK[UNIMOD:56]NEAIQAAHDAVAQEGQC[UNIMOD:4]R.V	sp|P09936|UCHL1_HUMAN
U87MG_100ug_NHS_Rep1_5Frac_Frac-5_SII_16449_1_16449_2_1	2.52746	4.41421e-05	9.779e-11	R.[UNIMOD:56]AEEYEFLTPVEEAPK[UNIMOD:56]GMLAR.G	sp|P52565|GDIR1_HUMAN
U87MG_100ug_NHS_Rep1_5Frac_Frac-3_SII_19307_1_19307_3_1	2.52714	4.41421e-05	9.80559e-11	L.[UNIMOD:27]EDVQPHDLGK[UNIMOD:56]VGEVIVTK[UNIMOD:56]DDAMLLK[UNIMOD:56]GK[UNIMOD:56]GDK[UNIMOD:56]AQIEK[UNIMOD:56]R.I	sp|P10809|CH60_HUMAN
U87MG_100ug_NHS_Rep1_5Frac_Frac-4_SII_22126_1_22126_3_1	2.52645	4.41421e-05	9.86394e-11	R.GALQNIIPASTGAAK[UNIMOD:56]AVGK[UNIMOD:56]VIPELNGK[UNIMOD:56]LTGMAFR.V	sp|P04406|G3P_HUMAN
U87MG_100ug_NHS_Rep1_5Frac_Frac-4_SII_14790_1_14790_3_1	2.5263	4.41421e-05	9.87612e-11	R.[UNIMOD:56]YASIC[UNIMOD:4]QQNGIVPIVEPEILPDGDHDLK[UNIMOD:56]R.C	sp|P09972|ALDOC_HUMAN
U87MG_100ug_NHS_Rep1_5Frac_Frac-5_SII_11444_1_11444_4_1	2.52624	4.41421e-05	9.881e-11	-.[UNIMOD:1]PPK[UNIMOD:56]DDK[UNIMOD:56]K[UNIMOD:56]K[UNIMOD:56]K[UNIMOD:56]DAGK[UNIMOD:56]SAK[UNIMOD:56]K[UNIMOD:56]DK[UNIMOD:56]DPVNK[UNIMOD:56]SGGK[UNIMOD:56]AK[UNIMOD:56]K[UNIMOD:56]K[UNIMOD:56]K[UNIMOD:56]WSK[UNIMOD:56]GK[UNIMOD:56]VR.D	sp|P62851|RS25_HUMAN
U87MG_100ug_NHS_Rep1_5Frac_Frac-3_SII_7984_1_7984_2_1	2.52419	4.41421e-05	1.00553e-10	R.LEGLGSSEADQDGLASTVR.S	sp|Q07065|CKAP4_HUMAN
U87MG_100ug_NHS_Rep1_5Frac_Frac-1_SII_14843_1_14843_3_1	2.52396	4.41421e-05	1.00754e-10	R.[UNIMOD:28][UNIMOD:56]QK[UNIMOD:56]ASIHEAWTDGK[UNIMOD:56]EAMLK[UNIMOD:56]HR.D	sp|O43707|ACTN4_HUMAN
U87MG_100ug_NHS_Rep1_5Frac_Frac-5_SII_21376_1_21376_4_1	2.52327	4.41421e-05	1.01343e-10	R.VLMEK[UNIMOD:56]EFPGFLENQK[UNIMOD:56]DPLAVDK[UNIMOD:56]IMK[UNIMOD:56]DLDQC[UNIMOD:4]R.D	sp|P60903|S10AA_HUMAN
U87MG_100ug_NHS_Rep1_5Frac_Frac-3_SII_17448_1_17448_2_1	2.52185	4.41421e-05	1.02581e-10	R.EDLVVAPAGITLK[UNIMOD:56]EANEILQR.S	sp|P12268|IMDH2_HUMAN
U87MG_100ug_NHS_Rep1_5Frac_Frac-4_SII_12785_1_12785_3_1	2.52174	4.41421e-05	1.02672e-10	R.FHVEEEGK[UNIMOD:56]GK[UNIMOD:56]DASGNK[UNIMOD:56]VK[UNIMOD:56]AEPAK[UNIMOD:56]IEAFR.A	sp|P00558|PGK1_HUMAN
U87MG_100ug_NHS_Rep1_5Frac_Frac-4_SII_10832_1_10832_2_1	2.52129	4.41421e-05	1.03074e-10	R.IVAPGK[UNIMOD:56]GILAADESTGSIAK[UNIMOD:56]R.L	sp|P04075|ALDOA_HUMAN
U87MG_100ug_NHS_Rep1_5Frac_Frac-3_SII_11360_1_11360_3_1	2.51909	4.41421e-05	1.05021e-10	R.FHVEEEGK[UNIMOD:56]GK[UNIMOD:56]DASGNK[UNIMOD:56]VK[UNIMOD:56]AEPAK[UNIMOD:56]IEAFR.A	sp|P00558|PGK1_HUMAN
U87MG_100ug_NHS_Rep1_5Frac_Frac-5_SII_20111_1_20111_3_1	2.51858	4.41421e-05	1.05479e-10	-.[UNIMOD:1]ASGVAVSDGVIK[UNIMOD:56]VFNDMK[UNIMOD:56]VR.K	sp|P23528|COF1_HUMAN
U87MG_100ug_NHS_Rep1_5Frac_Frac-4_SII_4583_1_4583_2_1	2.51782	4.41421e-05	1.06165e-10	R.[UNIMOD:56]EGAK[UNIMOD:56]YVSHGATGK[UNIMOD:56]GNDQVR.F	sp|P00966|ASSY_HUMAN
U87MG_100ug_NHS_Rep1_5Frac_Frac-3_SII_19702_1_19702_3_1	2.51673	4.41421e-05	1.07152e-10	R.AEGSDVANAVLDGADC[UNIMOD:4]IMLSGETAK[UNIMOD:56]GDYPLEAVR.M	sp|P14618|KPYM_HUMAN
U87MG_100ug_NHS_Rep1_5Frac_Frac-1_SII_16788_1_16788_3_1	2.51546	4.41421e-05	1.08323e-10	S.[UNIMOD:27]EAGTAFIQTQQLHAAMADTFLEHMC[UNIMOD:4]R.L	sp|P14618|KPYM_HUMAN
U87MG_100ug_NHS_Rep1_5Frac_Frac-3_SII_7263_1_7263_2_1	2.51452	4.41421e-05	1.09196e-10	R.HESGASIK[UNIMOD:56]IDEPLEGSEDR.I	sp|P61978|HNRPK_HUMAN
U87MG_100ug_NHS_Rep1_5Frac_Frac-3_SII_16854_1_16854_3_1	2.51185	4.41421e-05	1.11702e-10	S.[UNIMOD:27]EAGTAFIQTQQLHAAMADTFLEHMC[UNIMOD:4]R.L	sp|P14618|KPYM_HUMAN
U87MG_100ug_NHS_Rep1_5Frac_Frac-5_SII_15019_1_15019_3_1	2.51076	4.41421e-05	1.12753e-10	R.DDGLFSGDPNWFPK[UNIMOD:56]K[UNIMOD:56]SK[UNIMOD:56]ENPR.N	sp|P37802|TAGL2_HUMAN
U87MG_100ug_NHS_Rep1_5Frac_Frac-1_SII_17250_1_17250_4_1	2.51057	4.41421e-05	1.12929e-10	R.EQEVNILK[UNIMOD:56]K[UNIMOD:56]TLEEEAK[UNIMOD:56]THEAQIQEMR.Q	sp|P35579|MYH9_HUMAN
U87MG_100ug_NHS_Rep1_5Frac_Frac-4_SII_13705_1_13705_3_1	2.50944	4.41421e-05	1.14025e-10	R.FHVEEEGK[UNIMOD:56]GK[UNIMOD:56]DASGNK[UNIMOD:56]VK[UNIMOD:56]AEPAK[UNIMOD:56]IEAFR.A	sp|P00558|PGK1_HUMAN
U87MG_100ug_NHS_Rep1_5Frac_Frac-3_SII_22836_1_22836_3_1	2.50582	4.41421e-05	1.17596e-10	R.[UNIMOD:56]GLK[UNIMOD:56]MASTFIGNSTAIQELFK[UNIMOD:56]R.I	sp|Q9BUF5|TBB6_HUMAN
U87MG_100ug_NHS_Rep1_5Frac_Frac-3_SII_16397_1_16397_4_1	2.50139	4.41421e-05	1.22116e-10	-.[UNIMOD:1]SK[UNIMOD:56]PHSEAGTAFIQTQQLHAAMADTFLEHMC[UNIMOD:4]R.L	sp|P14618|KPYM_HUMAN
U87MG_100ug_NHS_Rep1_5Frac_Frac-5_SII_9874_1_9874_3_1	2.50119	4.41421e-05	1.2233e-10	R.VAEELALEQAK[UNIMOD:56]K[UNIMOD:56]ESEDQK[UNIMOD:56]R.L	sp|Q9NX63|MIC19_HUMAN
U87MG_100ug_NHS_Rep1_5Frac_Frac-3_SII_18359_1_18359_3_1	2.50105	4.41421e-05	1.22472e-10	R.[UNIMOD:56]SVTLLIK[UNIMOD:56]GPNK[UNIMOD:56]HTLTQIK[UNIMOD:56]DAVR.D	sp|P40227|TCPZ_HUMAN
U87MG_100ug_NHS_Rep1_5Frac_Frac-1_SII_19310_1_19310_3_1	2.50056	4.41421e-05	1.22988e-10	R.K[UNIMOD:56]DGNASGTTLLEALDC[UNIMOD:4]ILPPTRPTDK[UNIMOD:56]PLR.L	sp|P68104|EF1A1_HUMAN
U87MG_100ug_NHS_Rep1_5Frac_Frac-5_SII_15584_1_15584_3_1	2.50013	4.41421e-05	1.23443e-10	R.VISSIEQK[UNIMOD:56]TDTSDK[UNIMOD:56]K[UNIMOD:56]LQLIK[UNIMOD:56]DYR.E	sp|P27348|1433T_HUMAN
U87MG_100ug_NHS_Rep1_5Frac_Frac-2_SII_16705_1_16705_3_1	2.49992	4.41421e-05	1.23665e-10	R.ATEDGEEDEEMIESIENLEDLK[UNIMOD:56]GHSVR.E	sp|P49736|MCM2_HUMAN
U87MG_100ug_NHS_Rep1_5Frac_Frac-1_SII_13929_1_13929_4_1	2.49853	4.41421e-05	1.25134e-10	-.[UNIMOD:1]SK[UNIMOD:56]PHSEAGTAFIQTQQLHAAMADTFLEHM[UNIMOD:35]C[UNIMOD:4]R.L	sp|P14618|KPYM_HUMAN
U87MG_100ug_NHS_Rep1_5Frac_Frac-3_SII_16896_1_16896_3_1	2.49836	4.41421e-05	1.2532e-10	-.[UNIMOD:1]AEMGSK[UNIMOD:56]GVTAGK[UNIMOD:56]IASNVQK[UNIMOD:56]K[UNIMOD:56]LTR.A	sp|O00499|BIN1_HUMAN
U87MG_100ug_NHS_Rep1_5Frac_Frac-5_SII_14700_1_14700_3_1	2.49525	4.41421e-05	1.28685e-10	R.DDGLFSGDPNWFPK[UNIMOD:56]K[UNIMOD:56]SK[UNIMOD:56]ENPR.N	sp|P37802|TAGL2_HUMAN
U87MG_100ug_NHS_Rep1_5Frac_Frac-1_SII_20358_1_20358_3_1	2.49193	4.41421e-05	1.3237e-10	R.[UNIMOD:28]QSAC[UNIMOD:4]NLEK[UNIMOD:56]K[UNIMOD:56]QK[UNIMOD:56]K[UNIMOD:56]FDQLLAEEK[UNIMOD:56]TISAK[UNIMOD:56]YAEER.D	sp|P35579|MYH9_HUMAN
U87MG_100ug_NHS_Rep1_5Frac_Frac-5_SII_3316_1_3316_2_1	2.49129	4.41421e-05	1.33104e-10	-.[UNIMOD:1]AATGANAEK[UNIMOD:56]AESHNDC[UNIMOD:4]PVR.L	sp|Q16831|UPP1_HUMAN
U87MG_100ug_NHS_Rep1_5Frac_Frac-3_SII_14348_1_14348_3_1	2.48997	4.41421e-05	1.34609e-10	R.LEDK[UNIMOD:56]C[UNIMOD:4]LELVEHFGPNELR.K	sp|Q969Z0|FAKD4_HUMAN
U87MG_100ug_NHS_Rep1_5Frac_Frac-4_SII_21706_1_21706_3_1	2.48962	4.41421e-05	1.35002e-10	R.THTQDAVPLTLGQEFSGYVQQVK[UNIMOD:56]YAMTR.I	sp|P07954|FUMH_HUMAN
U87MG_100ug_NHS_Rep1_5Frac_Frac-5_SII_10894_1_10894_3_1	2.48913	4.41421e-05	1.35566e-10	-.[UNIMOD:56]PDPAK[UNIMOD:56]SAPAPK[UNIMOD:56]K[UNIMOD:56]GSK[UNIMOD:56]K[UNIMOD:56]AVTK[UNIMOD:56]AQK[UNIMOD:56]K[UNIMOD:56]DGK[UNIMOD:56]K[UNIMOD:56]R.K	sp|P23527|H2B1O_HUMAN
U87MG_100ug_NHS_Rep1_5Frac_Frac-5_SII_17821_1_17821_3_1	2.48904	4.41421e-05	1.35673e-10	Q.[UNIMOD:27]EMQLK[UNIMOD:56]EAK[UNIMOD:56]HIAEEADRK[UNIMOD:56]YEEVAR.K	sp|P67936|TPM4_HUMAN
U87MG_100ug_NHS_Rep1_5Frac_Frac-1_SII_21541_1_21541_3_1	2.48883	4.41421e-05	1.35919e-10	R.ASREEILAQAK[UNIMOD:56]ENEK[UNIMOD:56]K[UNIMOD:56]LK[UNIMOD:56]SMEAEMIQLQEELAAAER.A	sp|P35579|MYH9_HUMAN
U87MG_100ug_NHS_Rep1_5Frac_Frac-4_SII_11638_1_11638_2_1	2.48736	4.41421e-05	1.37636e-10	R.SHFEQWGTLTDC[UNIMOD:4]VVMR.D	sp|P09651|ROA1_HUMAN
U87MG_100ug_NHS_Rep1_5Frac_Frac-2_SII_10145_1_10145_3_1	2.48701	4.41421e-05	1.38047e-10	R.VELK[UNIMOD:56]GTVRPANDFNPDADAK[UNIMOD:56]ALR.K	sp|P08133|ANXA6_HUMAN
U87MG_100ug_NHS_Rep1_5Frac_Frac-5_SII_18021_1_18021_3_1	2.48665	4.41421e-05	1.38471e-10	R.[UNIMOD:56]K[UNIMOD:56]GTVLLADNVIC[UNIMOD:4]PGAPDFLAHVR.G	sp|P21964|COMT_HUMAN
U87MG_100ug_NHS_Rep1_5Frac_Frac-5_SII_10436_1_10436_2_1	2.48492	4.41421e-05	1.40518e-10	-.[UNIMOD:1]MMC[UNIMOD:4]GAPSATQPATAETQHIADQVR.S	sp|P04080|CYTB_HUMAN
U87MG_100ug_NHS_Rep1_5Frac_Frac-2_SII_16858_1_16858_3_1	2.48147	4.41421e-05	1.44723e-10	-.[UNIMOD:1]AEMGSK[UNIMOD:56]GVTAGK[UNIMOD:56]IASNVQK[UNIMOD:56]K[UNIMOD:56]LTR.A	sp|O00499|BIN1_HUMAN
U87MG_100ug_NHS_Rep1_5Frac_Frac-5_SII_13666_1_13666_3_1	2.48019	4.41421e-05	1.46306e-10	R.[UNIMOD:56]YDDMAAC[UNIMOD:4]MK[UNIMOD:56]SVTEQGAELSNEER.N	sp|P63104|1433Z_HUMAN
U87MG_100ug_NHS_Rep1_5Frac_Frac-5_SII_10984_1_10984_3_1	2.48008	4.41421e-05	1.46441e-10	R.AK[UNIMOD:56]C[UNIMOD:4]FEK[UNIMOD:56]NEAIQAAHDAVAQEGQC[UNIMOD:4]R.V	sp|P09936|UCHL1_HUMAN
U87MG_100ug_NHS_Rep1_5Frac_Frac-4_SII_10277_1_10277_3_1	2.48	4.41421e-05	1.46545e-10	-.[UNIMOD:1]SLK[UNIMOD:56]LQASNVTNK[UNIMOD:56]NDPK[UNIMOD:56]SINSR.V	sp|Q9UKM9|RALY_HUMAN
U87MG_100ug_NHS_Rep1_5Frac_Frac-2_SII_18114_1_18114_3_1	2.47989	4.41421e-05	1.46684e-10	-.[UNIMOD:1]MLK[UNIMOD:56]K[UNIMOD:56]FDK[UNIMOD:56]K[UNIMOD:56]DEESGGGSNPFQHLEK[UNIMOD:56]SAVLQEAR.V	sp|Q9Y678|COPG1_HUMAN
U87MG_100ug_NHS_Rep1_5Frac_Frac-1_SII_15928_1_15928_4_1	2.47971	4.41421e-05	1.46909e-10	-.[UNIMOD:1]SK[UNIMOD:56]PHSEAGTAFIQTQQLHAAMADTFLEHMC[UNIMOD:4]R.L	sp|P14618|KPYM_HUMAN
U87MG_100ug_NHS_Rep1_5Frac_Frac-4_SII_12391_1_12391_3_1	2.4796	4.41421e-05	1.4704e-10	R.FHVEEEGK[UNIMOD:56]GK[UNIMOD:56]DASGNK[UNIMOD:56]VK[UNIMOD:56]AEPAK[UNIMOD:56]IEAFR.A	sp|P00558|PGK1_HUMAN
U87MG_100ug_NHS_Rep1_5Frac_Frac-3_SII_18172_1_18172_2_1	2.47904	4.41421e-05	1.47745e-10	R.VQDDEVGDGTTSVTVLAAELLR.E	sp|P78371|TCPB_HUMAN
U87MG_100ug_NHS_Rep1_5Frac_Frac-5_SII_6419_1_6419_3_1	2.47902	4.41421e-05	1.47777e-10	R.GQTPK[UNIMOD:56]VAK[UNIMOD:56]QEK[UNIMOD:56]K[UNIMOD:56]K[UNIMOD:56]K[UNIMOD:56]K[UNIMOD:56]TGR.A	sp|P62861|RS30_HUMAN
U87MG_100ug_NHS_Rep1_5Frac_Frac-2_SII_14386_1_14386_3_1	2.47758	4.41421e-05	1.4959e-10	R.[UNIMOD:56]VHVSEEGTEPEAMLQVLGPK[UNIMOD:56]PALPAGTEDTAK[UNIMOD:56]EDAANR.K	sp|P06396|GELS_HUMAN
U87MG_100ug_NHS_Rep1_5Frac_Frac-5_SII_9559_1_9559_3_1	2.47732	4.41421e-05	1.49925e-10	R.[UNIMOD:27]EEHK[UNIMOD:56]K[UNIMOD:56]K[UNIMOD:56]HPDASVNFSEFSK[UNIMOD:56]K[UNIMOD:56]C[UNIMOD:4]SER.W	sp|P09429|HMGB1_HUMAN
U87MG_100ug_NHS_Rep1_5Frac_Frac-3_SII_20911_1_20911_3_1	2.47533	4.41421e-05	1.52486e-10	R.[UNIMOD:56]GIFPVLC[UNIMOD:4]K[UNIMOD:56]DPVQEAWAEDVDLR.V	sp|P14618|KPYM_HUMAN
U87MG_100ug_NHS_Rep1_5Frac_Frac-5_SII_18470_1_18470_2_1	2.47408	4.41421e-05	1.54124e-10	R.K[UNIMOD:56]EGGLGPLNIPLLADVTR.R	sp|P32119|PRDX2_HUMAN
U87MG_100ug_NHS_Rep1_5Frac_Frac-4_SII_13794_1_13794_3_1	2.47379	4.41421e-05	1.54511e-10	R.FHVEEEGK[UNIMOD:56]GK[UNIMOD:56]DASGNK[UNIMOD:56]VK[UNIMOD:56]AEPAK[UNIMOD:56]IEAFR.A	sp|P00558|PGK1_HUMAN
U87MG_100ug_NHS_Rep1_5Frac_Frac-1_SII_13787_1_13787_4_1	2.47336	4.41421e-05	1.55076e-10	-.[UNIMOD:1]SK[UNIMOD:56]PHSEAGTAFIQTQQLHAAMADTFLEHMC[UNIMOD:4]R.L	sp|P14618|KPYM_HUMAN
U87MG_100ug_NHS_Rep1_5Frac_Frac-2_SII_18226_1_18226_3_1	2.47307	4.41421e-05	1.5546e-10	R.[UNIMOD:56]SNTGGQAFPQC[UNIMOD:4]VFDHWQILPGDPFDNSSRPSQVVAETR.K	sp|P13639|EF2_HUMAN
U87MG_100ug_NHS_Rep1_5Frac_Frac-2_SII_18189_1_18189_3_1	2.47296	4.41421e-05	1.556e-10	R.[UNIMOD:56]SNTGGQAFPQC[UNIMOD:4]VFDHWQILPGDPFDNSSRPSQVVAETR.K	sp|P13639|EF2_HUMAN
U87MG_100ug_NHS_Rep1_5Frac_Frac-1_SII_7412_1_7412_3_1	2.47281	4.41421e-05	1.55798e-10	R.K[UNIMOD:56]ELK[UNIMOD:56]K[UNIMOD:56]DEGRK[UNIMOD:56]EEK[UNIMOD:56]K[UNIMOD:56]DAK[UNIMOD:56]K[UNIMOD:56]EEK[UNIMOD:56]R.K	sp|P78559|MAP1A_HUMAN
U87MG_100ug_NHS_Rep1_5Frac_Frac-5_SII_19368_1_19368_3_1	2.47246	4.41421e-05	1.56271e-10	R.VLMEK[UNIMOD:56]EFPGFLENQK[UNIMOD:56]DPLAVDK[UNIMOD:56]IM[UNIMOD:35]K[UNIMOD:56]DLDQC[UNIMOD:4]R.D	sp|P60903|S10AA_HUMAN
U87MG_100ug_NHS_Rep1_5Frac_Frac-1_SII_16153_1_16153_4_1	2.47219	4.41421e-05	1.56634e-10	-.[UNIMOD:1]SK[UNIMOD:56]PHSEAGTAFIQTQQLHAAMADTFLEHMC[UNIMOD:4]R.L	sp|P14618|KPYM_HUMAN
U87MG_100ug_NHS_Rep1_5Frac_Frac-5_SII_6428_1_6428_3_1	2.47211	4.41421e-05	1.56735e-10	R.GQTPK[UNIMOD:56]VAK[UNIMOD:56]QEK[UNIMOD:56]K[UNIMOD:56]K[UNIMOD:56]K[UNIMOD:56]K[UNIMOD:56]TGR.A	sp|P62861|RS30_HUMAN
U87MG_100ug_NHS_Rep1_5Frac_Frac-3_SII_21740_1_21740_3_1	2.47171	4.41421e-05	1.57275e-10	R.[UNIMOD:56]SGVSLAALK[UNIMOD:56]K[UNIMOD:56]ALAAAGYDVEK[UNIMOD:56]NNSR.I	sp|P16403|H12_HUMAN
U87MG_100ug_NHS_Rep1_5Frac_Frac-1_SII_17212_1_17212_3_1	2.47147	4.41421e-05	1.57585e-10	-.[UNIMOD:1]SIGVPIK[UNIMOD:56]VLHEAEGHIVTC[UNIMOD:4]ETNTGEVYR.G	sp|P62318|SMD3_HUMAN
U87MG_100ug_NHS_Rep1_5Frac_Frac-3_SII_11851_1_11851_3_1	2.4711	4.41421e-05	1.5809e-10	R.EK[UNIMOD:56]LQEEMLQREEAENTLQSFR.Q	sp|P08670|VIME_HUMAN
U87MG_100ug_NHS_Rep1_5Frac_Frac-1_SII_12513_1_12513_3_1	2.47007	4.41421e-05	1.59485e-10	R.[UNIMOD:28]QSGQTDPLQK[UNIMOD:56]EELQSGVDAANSAAQQYQR.R	sp|P46940|IQGA1_HUMAN
U87MG_100ug_NHS_Rep1_5Frac_Frac-4_SII_11696_1_11696_3_1	2.46925	4.41421e-05	1.60606e-10	R.EK[UNIMOD:56]LQEEMLQREEAENTLQSFR.Q	sp|P08670|VIME_HUMAN
U87MG_100ug_NHS_Rep1_5Frac_Frac-5_SII_10212_1_10212_3_1	2.46923	4.41421e-05	1.60633e-10	-.[UNIMOD:56]PEPAK[UNIMOD:56]FAPAPK[UNIMOD:56]K[UNIMOD:56]GSK[UNIMOD:56]K[UNIMOD:56]AVTK[UNIMOD:56]AQK[UNIMOD:56]K[UNIMOD:56]DGK[UNIMOD:56]K[UNIMOD:56]R.K	sp|Q6DN03|H2B2C_HUMAN
U87MG_100ug_NHS_Rep1_5Frac_Frac-2_SII_18000_1_18000_3_1	2.46869	4.41421e-05	1.61368e-10	R.[UNIMOD:56]SIGAAAK[UNIMOD:56]SQVISNAK[UNIMOD:56]NTVQGFK[UNIMOD:56]R.F	sp|P34932|HSP74_HUMAN
U87MG_100ug_NHS_Rep1_5Frac_Frac-3_SII_19467_1_19467_3_1	2.46844	4.41421e-05	1.61715e-10	R.[UNIMOD:56]GLK[UNIMOD:56]M[UNIMOD:35]SATFIGNSTAIQELFK[UNIMOD:56]R.I	sp|P68371|TBB4B_HUMAN
U87MG_100ug_NHS_Rep1_5Frac_Frac-1_SII_17539_1_17539_3_1	2.46823	4.41421e-05	1.61998e-10	R.LEGENTQDK[UNIMOD:56]NK[UNIMOD:56]K[UNIMOD:56]LRPLYDIPYMFEAR.E	sp|Q7KZF4|SND1_HUMAN
U87MG_100ug_NHS_Rep1_5Frac_Frac-4_SII_22242_1_22242_3_1	2.46407	4.41421e-05	1.67845e-10	R.DASLMVTNDGATILK[UNIMOD:56]NIGVDNPAAK[UNIMOD:56]VLVDMSR.V	sp|P78371|TCPB_HUMAN
U87MG_100ug_NHS_Rep1_5Frac_Frac-3_SII_12894_1_12894_2_1	2.46367	4.41421e-05	1.68423e-10	R.QVQSLTC[UNIMOD:4]EVDALK[UNIMOD:56]GTNESLER.Q	sp|P08670|VIME_HUMAN
U87MG_100ug_NHS_Rep1_5Frac_Frac-5_SII_16994_1_16994_2_1	2.46245	4.41421e-05	1.7019e-10	R.[UNIMOD:56]SGLAAK[UNIMOD:56]HFIDVGAGVIDEDYR.G	sp|P33316|DUT_HUMAN
U87MG_100ug_NHS_Rep1_5Frac_Frac-5_SII_19279_1_19279_3_1	2.46209	4.41421e-05	1.70707e-10	R.ELAILLGMLDPAEK[UNIMOD:56]DEK[UNIMOD:56]GMPVTAR.V	sp|P30041|PRDX6_HUMAN
U87MG_100ug_NHS_Rep1_5Frac_Frac-1_SII_11406_1_11406_3_1	2.46183	4.41421e-05	1.71082e-10	R.FHVEEEGK[UNIMOD:56]GK[UNIMOD:56]DASGNK[UNIMOD:56]VK[UNIMOD:56]AEPAK[UNIMOD:56]IEAFR.A	sp|P00558|PGK1_HUMAN
U87MG_100ug_NHS_Rep1_5Frac_Frac-5_SII_18062_1_18062_4_1	2.46106	4.41421e-05	1.72216e-10	R.EHEK[UNIMOD:56]EVLQK[UNIMOD:56]AIEENNNFSK[UNIMOD:56]M[UNIMOD:35]AEEK[UNIMOD:56]LTHK[UNIMOD:56]MEANK[UNIMOD:56]ENR.E	sp|P16949|STMN1_HUMAN
U87MG_100ug_NHS_Rep1_5Frac_Frac-5_SII_22114_1_22114_3_1	2.46072	4.41421e-05	1.72719e-10	-.[UNIMOD:56]MK[UNIMOD:56]PLVVFVLGGPGAGK[UNIMOD:56]GTQC[UNIMOD:4]AR.I	sp|P30085|KCY_HUMAN
U87MG_100ug_NHS_Rep1_5Frac_Frac-1_SII_15156_1_15156_3_1	2.45976	4.41421e-05	1.74127e-10	R.K[UNIMOD:56]DGNASGTTLLEALDC[UNIMOD:4]ILPPTRPTDK[UNIMOD:56]PLR.L	sp|P68104|EF1A1_HUMAN
U87MG_100ug_NHS_Rep1_5Frac_Frac-3_SII_3943_1_3943_2_1	2.45757	4.41421e-05	1.77411e-10	R.[UNIMOD:56]AAHSEGNTTAGLDMR.E	sp|P78371|TCPB_HUMAN
U87MG_100ug_NHS_Rep1_5Frac_Frac-4_SII_16496_1_16496_3_1	2.45734	4.41421e-05	1.77755e-10	R.FHVEEEGK[UNIMOD:56]GK[UNIMOD:56]DASGNK[UNIMOD:56]VK[UNIMOD:56]AEPAK[UNIMOD:56]IEAFR.A	sp|P00558|PGK1_HUMAN
U87MG_100ug_NHS_Rep1_5Frac_Frac-1_SII_9526_1_9526_3_1	2.457	4.41421e-05	1.78279e-10	D.PAK[UNIMOD:56]SAPAPK[UNIMOD:56]K[UNIMOD:56]GSK[UNIMOD:56]K[UNIMOD:56]AVTK[UNIMOD:56]VQK[UNIMOD:56]K[UNIMOD:56]DGK[UNIMOD:56]K[UNIMOD:56]R.K	sp|Q5QNW6|H2B2F_HUMAN
U87MG_100ug_NHS_Rep1_5Frac_Frac-3_SII_21841_1_21841_3_1	2.45612	4.41421e-05	1.79623e-10	R.[UNIMOD:56]GLK[UNIMOD:56]MSATFIGNSTAIQELFK[UNIMOD:56]R.I	sp|P68371|TBB4B_HUMAN
U87MG_100ug_NHS_Rep1_5Frac_Frac-5_SII_13864_1_13864_3_1	2.4557	4.41421e-05	1.80259e-10	R.NPPGFAFVEFEDPRDAADAVR.E	sp|P84103|SRSF3_HUMAN
U87MG_100ug_NHS_Rep1_5Frac_Frac-3_SII_16832_1_16832_3_1	2.45557	4.41421e-05	1.80462e-10	-.[UNIMOD:1]AEMGSK[UNIMOD:56]GVTAGK[UNIMOD:56]IASNVQK[UNIMOD:56]K[UNIMOD:56]LTR.A	sp|O00499|BIN1_HUMAN
U87MG_100ug_NHS_Rep1_5Frac_Frac-4_SII_12752_1_12752_3_1	2.45505	4.41421e-05	1.81257e-10	R.FHVEEEGK[UNIMOD:56]GK[UNIMOD:56]DASGNK[UNIMOD:56]VK[UNIMOD:56]AEPAK[UNIMOD:56]IEAFR.A	sp|P00558|PGK1_HUMAN
U87MG_100ug_NHS_Rep1_5Frac_Frac-4_SII_13039_1_13039_3_1	2.45493	4.41421e-05	1.81444e-10	R.FHVEEEGK[UNIMOD:56]GK[UNIMOD:56]DASGNK[UNIMOD:56]VK[UNIMOD:56]AEPAK[UNIMOD:56]IEAFR.A	sp|P00558|PGK1_HUMAN
U87MG_100ug_NHS_Rep1_5Frac_Frac-2_SII_18881_1_18881_2_1	2.45447	4.41421e-05	1.82164e-10	R.VEESTQVGGDPFPAVFGDFLGR.E	sp|Q14315|FLNC_HUMAN
U87MG_100ug_NHS_Rep1_5Frac_Frac-2_SII_16721_1_16721_3_1	2.45387	4.41421e-05	1.83094e-10	M.[UNIMOD:27]EK[UNIMOD:56]EHLNK[UNIMOD:56]VQTANEVK[UNIMOD:56]QAVEQQIQSHR.E	sp|P33176|KINH_HUMAN
U87MG_100ug_NHS_Rep1_5Frac_Frac-5_SII_13287_1_13287_3_1	2.45343	4.41421e-05	1.83786e-10	R.YDDMAAAMK[UNIMOD:56]AVTEQGHELSNEER.N	sp|P31946|1433B_HUMAN
U87MG_100ug_NHS_Rep1_5Frac_Frac-4_SII_14465_1_14465_3_1	2.45328	4.41421e-05	1.84016e-10	R.FHVEEEGK[UNIMOD:56]GK[UNIMOD:56]DASGNK[UNIMOD:56]VK[UNIMOD:56]AEPAK[UNIMOD:56]IEAFR.A	sp|P00558|PGK1_HUMAN
U87MG_100ug_NHS_Rep1_5Frac_Frac-4_SII_12292_1_12292_3_1	2.45262	4.41421e-05	1.85062e-10	R.FHVEEEGK[UNIMOD:56]GK[UNIMOD:56]DASGNK[UNIMOD:56]VK[UNIMOD:56]AEPAK[UNIMOD:56]IEAFR.A	sp|P00558|PGK1_HUMAN
U87MG_100ug_NHS_Rep1_5Frac_Frac-1_SII_13676_1_13676_4_1	2.45212	4.41421e-05	1.85851e-10	-.[UNIMOD:1]SK[UNIMOD:56]PHSEAGTAFIQTQQLHAAM[UNIMOD:35]ADTFLEHMC[UNIMOD:4]R.L	sp|P14618|KPYM_HUMAN
U87MG_100ug_NHS_Rep1_5Frac_Frac-1_SII_14066_1_14066_2_1	2.45167	4.41421e-05	1.86557e-10	R.[UNIMOD:28][UNIMOD:56]QK[UNIMOD:56]HSQAVEELAEQLEQTK[UNIMOD:56]R.V	sp|P35579|MYH9_HUMAN
U87MG_100ug_NHS_Rep1_5Frac_Frac-3_SII_19151_1_19151_3_1	2.45162	4.41421e-05	1.86647e-10	R.TLK[UNIMOD:56]LTTPTYGDLNHLVSATMSGVTTC[UNIMOD:4]LR.F	sp|P07437|TBB5_HUMAN
U87MG_100ug_NHS_Rep1_5Frac_Frac-2_SII_16720_1_16720_3_1	2.45062	4.41421e-05	1.8823e-10	R.ATEDGEEDEEMIESIENLEDLK[UNIMOD:56]GHSVR.E	sp|P49736|MCM2_HUMAN
U87MG_100ug_NHS_Rep1_5Frac_Frac-3_SII_20402_1_20402_3_1	2.44976	4.41421e-05	1.89629e-10	-.[UNIMOD:1]ATPGNLGSSVLASK[UNIMOD:56]TK[UNIMOD:56]TK[UNIMOD:56]K[UNIMOD:56]K[UNIMOD:56]HFVAQK[UNIMOD:56]VK[UNIMOD:56]LFR.A	sp|P48426|PI42A_HUMAN
U87MG_100ug_NHS_Rep1_5Frac_Frac-1_SII_17714_1_17714_3_1	2.44975	4.41421e-05	1.89639e-10	R.C[UNIMOD:4]QHLQAEK[UNIMOD:56]K[UNIMOD:56]K[UNIMOD:56]MQQNIQELEEQLEEEESAR.Q	sp|P35579|MYH9_HUMAN
U87MG_100ug_NHS_Rep1_5Frac_Frac-1_SII_15261_1_15261_3_1	2.44928	4.41421e-05	1.90406e-10	R.[UNIMOD:56]C[UNIMOD:4]IIPNHEK[UNIMOD:56]K[UNIMOD:56]AGK[UNIMOD:56]LDPHLVLDQLR.C	sp|P35579|MYH9_HUMAN
U87MG_100ug_NHS_Rep1_5Frac_Frac-2_SII_14699_1_14699_3_1	2.44742	4.41421e-05	1.93435e-10	R.[UNIMOD:28][UNIMOD:56]QK[UNIMOD:56]ASIHEAWTDGK[UNIMOD:56]EAMLK[UNIMOD:56]HR.D	sp|O43707|ACTN4_HUMAN
U87MG_100ug_NHS_Rep1_5Frac_Frac-2_SII_15416_1_15416_3_1	2.44685	4.41421e-05	1.94385e-10	R.[UNIMOD:56]SIFGEDALANVSIEK[UNIMOD:56]PIHQGPDAAVTGHIR.I	sp|P53618|COPB_HUMAN
U87MG_100ug_NHS_Rep1_5Frac_Frac-5_SII_20528_1_20528_3_1	2.44634	4.41421e-05	1.95222e-10	-.[UNIMOD:1]ASGVAVSDGVIK[UNIMOD:56]VFNDMK[UNIMOD:56]VR.K	sp|P23528|COF1_HUMAN
U87MG_100ug_NHS_Rep1_5Frac_Frac-4_SII_15165_1_15165_3_1	2.4463	4.41421e-05	1.95293e-10	R.FHVEEEGK[UNIMOD:56]GK[UNIMOD:56]DASGNK[UNIMOD:56]VK[UNIMOD:56]AEPAK[UNIMOD:56]IEAFR.A	sp|P00558|PGK1_HUMAN
U87MG_100ug_NHS_Rep1_5Frac_Frac-4_SII_14657_1_14657_3_1	2.44599	4.41421e-05	1.95818e-10	R.FHVEEEGK[UNIMOD:56]GK[UNIMOD:56]DASGNK[UNIMOD:56]VK[UNIMOD:56]AEPAK[UNIMOD:56]IEAFR.A	sp|P00558|PGK1_HUMAN
U87MG_100ug_NHS_Rep1_5Frac_Frac-1_SII_14867_1_14867_3_1	2.44596	4.41421e-05	1.95856e-10	R.[UNIMOD:28][UNIMOD:56]QK[UNIMOD:56]ASIHEAWTDGK[UNIMOD:56]EAMLK[UNIMOD:56]HR.D	sp|O43707|ACTN4_HUMAN
U87MG_100ug_NHS_Rep1_5Frac_Frac-4_SII_15120_1_15120_3_1	2.44587	4.41421e-05	1.9602e-10	R.FHVEEEGK[UNIMOD:56]GK[UNIMOD:56]DASGNK[UNIMOD:56]VK[UNIMOD:56]AEPAK[UNIMOD:56]IEAFR.A	sp|P00558|PGK1_HUMAN
U87MG_100ug_NHS_Rep1_5Frac_Frac-3_SII_15208_1_15208_3_1	2.44524	4.41421e-05	1.97073e-10	-.[UNIMOD:1]AEM[UNIMOD:35]GSK[UNIMOD:56]GVTAGK[UNIMOD:56]IASNVQK[UNIMOD:56]K[UNIMOD:56]LTR.A	sp|O00499|BIN1_HUMAN
U87MG_100ug_NHS_Rep1_5Frac_Frac-4_SII_10281_1_10281_3_1	2.44402	4.41421e-05	1.99128e-10	-.[UNIMOD:1]SETAPAETATPAPVEK[UNIMOD:56]SPAK[UNIMOD:56]K[UNIMOD:56]K[UNIMOD:56]ATK[UNIMOD:56]K[UNIMOD:56]AAGAGAAK[UNIMOD:56]R.K	sp|P16401|H15_HUMAN
U87MG_100ug_NHS_Rep1_5Frac_Frac-3_SII_15732_1_15732_3_1	2.44392	4.41421e-05	1.99296e-10	-.[UNIMOD:1]MEDLDQSPLVSSSDSPPRPQPAFK[UNIMOD:56]YQFVR.E	sp|Q9NQC3|RTN4_HUMAN
U87MG_100ug_NHS_Rep1_5Frac_Frac-2_SII_22026_1_22026_3_1	2.44334	4.41421e-05	2.00281e-10	R.[UNIMOD:56]AVHANPPTLLLPVAHMLEVGDPDDLAFLR.K	sp|Q13724|MOGS_HUMAN
U87MG_100ug_NHS_Rep1_5Frac_Frac-5_SII_7353_1_7353_3_1	2.44325	4.41421e-05	2.00432e-10	D.PAK[UNIMOD:56]SAPAPK[UNIMOD:56]K[UNIMOD:56]GSK[UNIMOD:56]K[UNIMOD:56]AVTK[UNIMOD:56]AQK[UNIMOD:56]K[UNIMOD:56]DGK[UNIMOD:56]K[UNIMOD:56]R.K	sp|P62807|H2B1C_HUMAN
U87MG_100ug_NHS_Rep1_5Frac_Frac-4_SII_5931_1_5931_2_1	2.44296	4.41421e-05	2.00941e-10	R.[UNIMOD:56]HAHGDQYK[UNIMOD:56]ATDFVADR.A	sp|P48735|IDHP_HUMAN
U87MG_100ug_NHS_Rep1_5Frac_Frac-4_SII_19947_1_19947_2_1	2.43957	4.41421e-05	2.06821e-10	R.[UNIMOD:56]SLHDALC[UNIMOD:4]VLAQTVK[UNIMOD:56]DSR.T	sp|P78371|TCPB_HUMAN
U87MG_100ug_NHS_Rep1_5Frac_Frac-1_SII_14448_1_14448_3_1	2.43939	4.41421e-05	2.07143e-10	R.YESLTDPSK[UNIMOD:56]LDSGK[UNIMOD:56]ELHINLIPNK[UNIMOD:56]QDR.T	sp|P07900|HS90A_HUMAN
U87MG_100ug_NHS_Rep1_5Frac_Frac-4_SII_15479_1_15479_3_1	2.43893	4.41421e-05	2.0795e-10	R.FHVEEEGK[UNIMOD:56]GK[UNIMOD:56]DASGNK[UNIMOD:56]VK[UNIMOD:56]AEPAK[UNIMOD:56]IEAFR.A	sp|P00558|PGK1_HUMAN
U87MG_100ug_NHS_Rep1_5Frac_Frac-2_SII_11146_1_11146_3_1	2.43816	4.41421e-05	2.09332e-10	R.FHVEEEGK[UNIMOD:56]GK[UNIMOD:56]DASGNK[UNIMOD:56]VK[UNIMOD:56]AEPAK[UNIMOD:56]IEAFR.A	sp|P00558|PGK1_HUMAN
U87MG_100ug_NHS_Rep1_5Frac_Frac-4_SII_12359_1_12359_3_1	2.43752	4.41421e-05	2.10471e-10	R.FHVEEEGK[UNIMOD:56]GK[UNIMOD:56]DASGNK[UNIMOD:56]VK[UNIMOD:56]AEPAK[UNIMOD:56]IEAFR.A	sp|P00558|PGK1_HUMAN
U87MG_100ug_NHS_Rep1_5Frac_Frac-2_SII_9373_1_9373_3_1	2.43751	4.41421e-05	2.10489e-10	R.AQK[UNIMOD:56]K[UNIMOD:56]AQIEEEK[UNIMOD:56]K[UNIMOD:56]NAEK[UNIMOD:56]EK[UNIMOD:56]QQR.N	sp|Q9BXJ9|NAA15_HUMAN
U87MG_100ug_NHS_Rep1_5Frac_Frac-3_SII_12975_1_12975_2_1	2.43735	4.41421e-05	2.1078e-10	R.QVQSLTC[UNIMOD:4]EVDALK[UNIMOD:56]GTNESLER.Q	sp|P08670|VIME_HUMAN
U87MG_100ug_NHS_Rep1_5Frac_Frac-1_SII_19033_1_19033_3_1	2.436	4.41421e-05	2.13207e-10	R.QSAC[UNIMOD:4]NLEK[UNIMOD:56]K[UNIMOD:56]QK[UNIMOD:56]K[UNIMOD:56]FDQLLAEEK[UNIMOD:56]TISAK[UNIMOD:56]YAEER.D	sp|P35579|MYH9_HUMAN
U87MG_100ug_NHS_Rep1_5Frac_Frac-3_SII_19354_1_19354_3_1	2.4328	4.41421e-05	2.19105e-10	-.[UNIMOD:1]ATNFLAHEK[UNIMOD:56]IWFDK[UNIMOD:56]FK[UNIMOD:56]YDDAERR.F	sp|P29692|EF1D_HUMAN
U87MG_100ug_NHS_Rep1_5Frac_Frac-4_SII_6889_1_6889_3_1	2.43007	4.41421e-05	2.2427e-10	R.HQGVMVGMGQK[UNIMOD:56]DSYVGDEAQSK[UNIMOD:56]R.G	sp|P60709|ACTB_HUMAN
U87MG_100ug_NHS_Rep1_5Frac_Frac-4_SII_13249_1_13249_2_1	2.42943	4.41421e-05	2.25489e-10	A.[UNIMOD:56]HSLLPVDDAINGLSEEQR.Q	sp|P26440|IVD_HUMAN
U87MG_100ug_NHS_Rep1_5Frac_Frac-2_SII_14283_1_14283_3_1	2.4288	4.41421e-05	2.26716e-10	R.YESLTDPSK[UNIMOD:56]LDSGK[UNIMOD:56]ELHINLIPNK[UNIMOD:56]QDR.T	sp|P07900|HS90A_HUMAN
U87MG_100ug_NHS_Rep1_5Frac_Frac-5_SII_17478_1_17478_3_1	2.42555	4.41421e-05	2.33082e-10	-.[UNIMOD:1]SIGVPIK[UNIMOD:56]VLHEAEGHIVTC[UNIMOD:4]ETNTGEVYR.G	sp|P62318|SMD3_HUMAN
U87MG_100ug_NHS_Rep1_5Frac_Frac-1_SII_22972_1_22972_3_1	2.4252	4.41421e-05	2.33769e-10	Q.[UNIMOD:27]EALHTQMLTAVQEISHLIEPLANAAR.A	sp|Q9Y490|TLN1_HUMAN
U87MG_100ug_NHS_Rep1_5Frac_Frac-5_SII_17881_1_17881_3_1	2.42507	4.41421e-05	2.34029e-10	-.[UNIMOD:56]M[UNIMOD:35]K[UNIMOD:56]PLVVFVLGGPGAGK[UNIMOD:56]GTQC[UNIMOD:4]AR.I	sp|P30085|KCY_HUMAN
U87MG_100ug_NHS_Rep1_5Frac_Frac-3_SII_13387_1_13387_3_1	2.42469	4.41421e-05	2.34797e-10	R.[UNIMOD:56]GAGM[UNIMOD:35]PGQHGQITQQELDTVVK[UNIMOD:56]TQHEILR.Q	sp|P49257|LMAN1_HUMAN
U87MG_100ug_NHS_Rep1_5Frac_Frac-1_SII_15084_1_15084_4_1	2.42296	4.41421e-05	2.38279e-10	R.TEMEDLMSSK[UNIMOD:56]DDVGK[UNIMOD:56]SVHELEK[UNIMOD:56]SK[UNIMOD:56]R.A	sp|P35579|MYH9_HUMAN
U87MG_100ug_NHS_Rep1_5Frac_Frac-1_SII_15953_1_15953_3_1	2.42288	4.41421e-05	2.38444e-10	R.EQEVNILK[UNIMOD:56]K[UNIMOD:56]TLEEEAK[UNIMOD:56]THEAQIQEM[UNIMOD:35]R.Q	sp|P35579|MYH9_HUMAN
U87MG_100ug_NHS_Rep1_5Frac_Frac-5_SII_18084_1_18084_3_1	2.42275	4.41421e-05	2.38715e-10	R.[UNIMOD:56]QK[UNIMOD:56]DVK[UNIMOD:56]DGK[UNIMOD:56]YSQVLANGLDNK[UNIMOD:56]LREDLER.L	sp|P62269|RS18_HUMAN
U87MG_100ug_NHS_Rep1_5Frac_Frac-3_SII_16392_1_16392_3_1	2.42157	4.41421e-05	2.41112e-10	R.[UNIMOD:56]TATESFASDPILYRPVAVALDTK[UNIMOD:56]GPEIR.T	sp|P14618|KPYM_HUMAN
U87MG_100ug_NHS_Rep1_5Frac_Frac-2_SII_15315_1_15315_3_1	2.42124	4.41421e-05	2.41789e-10	R.[UNIMOD:56]SDK[UNIMOD:56]GNEFVVIHNGIITNYK[UNIMOD:56]DLR.K	sp|O94808|GFPT2_HUMAN
U87MG_100ug_NHS_Rep1_5Frac_Frac-5_SII_13316_1_13316_3_1	2.42053	4.41421e-05	2.43264e-10	R.[UNIMOD:28]QTATQLLK[UNIMOD:56]LAHK[UNIMOD:56]YRPETK[UNIMOD:56]QEK[UNIMOD:56]K[UNIMOD:56]QR.L	sp|P62424|RL7A_HUMAN
U87MG_100ug_NHS_Rep1_5Frac_Frac-3_SII_21821_1_21821_3_1	2.41983	4.41421e-05	2.44716e-10	R.[UNIMOD:56]GLK[UNIMOD:56]MSATFIGNSTAIQELFK[UNIMOD:56]R.I	sp|P68371|TBB4B_HUMAN
U87MG_100ug_NHS_Rep1_5Frac_Frac-5_SII_22244_1_22244_3_1	2.41973	4.41421e-05	2.44919e-10	-.[UNIMOD:1]ASGVAVSDGVIK[UNIMOD:56]VFNDMK[UNIMOD:56]VR.K	sp|P23528|COF1_HUMAN
U87MG_100ug_NHS_Rep1_5Frac_Frac-5_SII_23343_1_23343_3_1	2.4194	4.41421e-05	2.45623e-10	-.[UNIMOD:1]ASGVAVSDGVIK[UNIMOD:56]VFNDMK[UNIMOD:56]VR.K	sp|P23528|COF1_HUMAN
U87MG_100ug_NHS_Rep1_5Frac_Frac-3_SII_22816_1_22816_3_1	2.41841	4.41421e-05	2.47695e-10	R.[UNIMOD:56]GLK[UNIMOD:56]MASTFIGNSTAIQELFK[UNIMOD:56]R.I	sp|Q9BUF5|TBB6_HUMAN
U87MG_100ug_NHS_Rep1_5Frac_Frac-4_SII_13739_1_13739_3_1	2.41645	4.41421e-05	2.51869e-10	R.FHVEEEGK[UNIMOD:56]GK[UNIMOD:56]DASGNK[UNIMOD:56]VK[UNIMOD:56]AEPAK[UNIMOD:56]IEAFR.A	sp|P00558|PGK1_HUMAN
U87MG_100ug_NHS_Rep1_5Frac_Frac-4_SII_2356_1_2356_3_1	2.4159	4.41421e-05	2.53053e-10	R.DTPAK[UNIMOD:56]NAQK[UNIMOD:56]SNQNGK[UNIMOD:56]DSK[UNIMOD:56]PSSTPR.S	sp|P06748|NPM_HUMAN
U87MG_100ug_NHS_Rep1_5Frac_Frac-5_SII_14622_1_14622_3_1	2.41558	4.41421e-05	2.53745e-10	R.DDGLFSGDPNWFPK[UNIMOD:56]K[UNIMOD:56]SK[UNIMOD:56]ENPR.N	sp|P37802|TAGL2_HUMAN
U87MG_100ug_NHS_Rep1_5Frac_Frac-1_SII_14497_1_14497_2_1	2.41337	4.41421e-05	2.58582e-10	R.K[UNIMOD:56]K[UNIMOD:56]VEAQLQELQVK[UNIMOD:56]FNEGER.V	sp|P35579|MYH9_HUMAN
U87MG_100ug_NHS_Rep1_5Frac_Frac-3_SII_21863_1_21863_3_1	2.41331	4.41421e-05	2.58709e-10	R.[UNIMOD:56]GLK[UNIMOD:56]MSATFIGNSTAIQELFK[UNIMOD:56]R.I	sp|P68371|TBB4B_HUMAN
U87MG_100ug_NHS_Rep1_5Frac_Frac-1_SII_18298_1_18298_3_1	2.4132	4.41421e-05	2.58957e-10	R.LEDLLQDAQDEK[UNIMOD:56]EQLNEYK[UNIMOD:56]GHLSGLAK[UNIMOD:56]R.A	sp|Q15149|PLEC_HUMAN
U87MG_100ug_NHS_Rep1_5Frac_Frac-4_SII_18735_1_18735_3_1	2.41168	4.41421e-05	2.62314e-10	C.[UNIMOD:27]EQALAAEPK[UNIMOD:56]AK[UNIMOD:56]DPFAHLPK[UNIMOD:56]STFVLDEFK[UNIMOD:56]R.K	sp|P26641|EF1G_HUMAN
U87MG_100ug_NHS_Rep1_5Frac_Frac-3_SII_21646_1_21646_3_1	2.41122	4.41421e-05	2.63353e-10	-.[UNIMOD:1]ALHVPK[UNIMOD:56]APGFAQMLK[UNIMOD:56]EGAK[UNIMOD:56]HFSGLEEAVYR.N	sp|P50990|TCPQ_HUMAN
U87MG_100ug_NHS_Rep1_5Frac_Frac-5_SII_21879_1_21879_3_1	2.41054	4.41421e-05	2.64891e-10	R.[UNIMOD:56]SGVSLAALK[UNIMOD:56]K[UNIMOD:56]ALAAAGYDVEK[UNIMOD:56]NNSR.I	sp|P16403|H12_HUMAN
U87MG_100ug_NHS_Rep1_5Frac_Frac-1_SII_17142_1_17142_3_1	2.41049	4.41421e-05	2.64997e-10	R.NELQK[UNIMOD:56]LEDDAK[UNIMOD:56]DNQQK[UNIMOD:56]ANEVEQMIR.D	sp|Q14204|DYHC1_HUMAN
U87MG_100ug_NHS_Rep1_5Frac_Frac-4_SII_15007_1_15007_3_1	2.40731	4.41421e-05	2.72274e-10	R.FHVEEEGK[UNIMOD:56]GK[UNIMOD:56]DASGNK[UNIMOD:56]VK[UNIMOD:56]AEPAK[UNIMOD:56]IEAFR.A	sp|P00558|PGK1_HUMAN
U87MG_100ug_NHS_Rep1_5Frac_Frac-2_SII_14438_1_14438_2_1	2.40723	4.41421e-05	2.72468e-10	R.IEIESFYEGEDFSETLTR.A	sp|P11021|BIP_HUMAN
U87MG_100ug_NHS_Rep1_5Frac_Frac-3_SII_10071_1_10071_3_1	2.40555	4.41421e-05	2.76401e-10	-.[UNIMOD:56]PDPAK[UNIMOD:56]SAPAPK[UNIMOD:56]K[UNIMOD:56]GSK[UNIMOD:56]K[UNIMOD:56]AVTK[UNIMOD:56]AQK[UNIMOD:56]K[UNIMOD:56]DGK[UNIMOD:56]K[UNIMOD:56]R.K	sp|P23527|H2B1O_HUMAN
U87MG_100ug_NHS_Rep1_5Frac_Frac-4_SII_19871_1_19871_2_1	2.40548	4.41421e-05	2.7656e-10	R.[UNIMOD:56]SLHDALC[UNIMOD:4]VLAQTVK[UNIMOD:56]DSR.T	sp|P78371|TCPB_HUMAN
U87MG_100ug_NHS_Rep1_5Frac_Frac-4_SII_12098_1_12098_3_1	2.40446	4.41421e-05	2.78966e-10	R.FHVEEEGK[UNIMOD:56]GK[UNIMOD:56]DASGNK[UNIMOD:56]VK[UNIMOD:56]AEPAK[UNIMOD:56]IEAFR.A	sp|P00558|PGK1_HUMAN
U87MG_100ug_NHS_Rep1_5Frac_Frac-5_SII_6457_1_6457_3_1	2.4019	4.41421e-05	2.85116e-10	R.TLVVHEK[UNIMOD:56]ADDLGK[UNIMOD:56]GGNEESTK[UNIMOD:56]TGNAGSR.L	sp|P00441|SODC_HUMAN
U87MG_100ug_NHS_Rep1_5Frac_Frac-4_SII_17708_1_17708_3_1	2.40113	4.41421e-05	2.86991e-10	Q.[UNIMOD:27]EMQLK[UNIMOD:56]EAK[UNIMOD:56]HIAEEADRK[UNIMOD:56]YEEVAR.K	sp|P67936|TPM4_HUMAN
U87MG_100ug_NHS_Rep1_5Frac_Frac-2_SII_18891_1_18891_3_1	2.40108	4.41421e-05	2.87116e-10	R.[UNIMOD:27]EQEVNILK[UNIMOD:56]K[UNIMOD:56]TLEEEAK[UNIMOD:56]THEAQIQEMR.Q	sp|P35579|MYH9_HUMAN
U87MG_100ug_NHS_Rep1_5Frac_Frac-4_SII_13983_1_13983_3_1	2.40031	4.41421e-05	2.89023e-10	R.FHVEEEGK[UNIMOD:56]GK[UNIMOD:56]DASGNK[UNIMOD:56]VK[UNIMOD:56]AEPAK[UNIMOD:56]IEAFR.A	sp|P00558|PGK1_HUMAN
U87MG_100ug_NHS_Rep1_5Frac_Frac-4_SII_14182_1_14182_3_1	2.39952	4.41421e-05	2.9097e-10	R.FHVEEEGK[UNIMOD:56]GK[UNIMOD:56]DASGNK[UNIMOD:56]VK[UNIMOD:56]AEPAK[UNIMOD:56]IEAFR.A	sp|P00558|PGK1_HUMAN
U87MG_100ug_NHS_Rep1_5Frac_Frac-3_SII_10421_1_10421_3_1	2.39914	4.41421e-05	2.91917e-10	-.[UNIMOD:1]SLK[UNIMOD:56]LQASNVTNK[UNIMOD:56]NDPK[UNIMOD:56]SINSR.V	sp|Q9UKM9|RALY_HUMAN
U87MG_100ug_NHS_Rep1_5Frac_Frac-5_SII_21871_1_21871_3_1	2.39901	4.41421e-05	2.92224e-10	-.[UNIMOD:1]AAAAELSLLEK[UNIMOD:56]SLGLSK[UNIMOD:56]GNK[UNIMOD:56]YSAQGER.Q	sp|O43324|MCA3_HUMAN
U87MG_100ug_NHS_Rep1_5Frac_Frac-5_SII_15659_1_15659_3_1	2.39887	4.41421e-05	2.92588e-10	R.VISSIEQK[UNIMOD:56]TDTSDK[UNIMOD:56]K[UNIMOD:56]LQLIK[UNIMOD:56]DYR.E	sp|P27348|1433T_HUMAN
U87MG_100ug_NHS_Rep1_5Frac_Frac-1_SII_11381_1_11381_3_1	2.3986	4.41421e-05	2.93266e-10	R.FHVEEEGK[UNIMOD:56]GK[UNIMOD:56]DASGNK[UNIMOD:56]VK[UNIMOD:56]AEPAK[UNIMOD:56]IEAFR.A	sp|P00558|PGK1_HUMAN
U87MG_100ug_NHS_Rep1_5Frac_Frac-3_SII_20101_1_20101_2_1	2.39822	4.41421e-05	2.942e-10	R.[UNIMOD:56]SLHDALC[UNIMOD:4]VLAQTVK[UNIMOD:56]DSR.T	sp|P78371|TCPB_HUMAN
U87MG_100ug_NHS_Rep1_5Frac_Frac-1_SII_3532_1_3532_2_1	2.39794	4.41421e-05	2.94907e-10	-.[UNIMOD:1]AATGANAEK[UNIMOD:56]AESHNDC[UNIMOD:4]PVR.L	sp|Q16831|UPP1_HUMAN
U87MG_100ug_NHS_Rep1_5Frac_Frac-4_SII_11843_1_11843_3_1	2.39738	4.41421e-05	2.96329e-10	R.FHVEEEGK[UNIMOD:56]GK[UNIMOD:56]DASGNK[UNIMOD:56]VK[UNIMOD:56]AEPAK[UNIMOD:56]IEAFR.A	sp|P00558|PGK1_HUMAN
U87MG_100ug_NHS_Rep1_5Frac_Frac-4_SII_19117_1_19117_3_1	2.39683	4.41421e-05	2.97727e-10	R.K[UNIMOD:56]DGNASGTTLLEALDC[UNIMOD:4]ILPPTRPTDK[UNIMOD:56]PLR.L	sp|P68104|EF1A1_HUMAN
U87MG_100ug_NHS_Rep1_5Frac_Frac-5_SII_18248_1_18248_3_1	2.39555	4.41421e-05	3.00989e-10	R.VK[UNIMOD:56]ELK[UNIMOD:56]K[UNIMOD:56]ILDDWGETC[UNIMOD:4]K[UNIMOD:56]GC[UNIMOD:4]AEK[UNIMOD:56]SDYIR.K	sp|P55145|MANF_HUMAN
U87MG_100ug_NHS_Rep1_5Frac_Frac-4_SII_2477_1_2477_3_1	2.39543	4.41421e-05	3.01283e-10	R.DTPAK[UNIMOD:56]NAQK[UNIMOD:56]SNQNGK[UNIMOD:56]DSK[UNIMOD:56]PSSTPR.S	sp|P06748|NPM_HUMAN
U87MG_100ug_NHS_Rep1_5Frac_Frac-3_SII_17024_1_17024_3_1	2.3951	4.41421e-05	3.02137e-10	S.[UNIMOD:27]EAGTAFIQTQQLHAAMADTFLEHMC[UNIMOD:4]R.L	sp|P14618|KPYM_HUMAN
U87MG_100ug_NHS_Rep1_5Frac_Frac-3_SII_14538_1_14538_2_1	2.39496	4.41421e-05	3.02505e-10	R.IEIESFYEGEDFSETLTR.A	sp|P11021|BIP_HUMAN
U87MG_100ug_NHS_Rep1_5Frac_Frac-1_SII_18967_1_18967_2_1	2.39475	4.41421e-05	3.03039e-10	R.VEESTQVGGDPFPAVFGDFLGR.E	sp|Q14315|FLNC_HUMAN
U87MG_100ug_NHS_Rep1_5Frac_Frac-4_SII_11744_1_11744_3_1	2.39401	4.41421e-05	3.0496e-10	R.FHVEEEGK[UNIMOD:56]GK[UNIMOD:56]DASGNK[UNIMOD:56]VK[UNIMOD:56]AEPAK[UNIMOD:56]IEAFR.A	sp|P00558|PGK1_HUMAN
U87MG_100ug_NHS_Rep1_5Frac_Frac-1_SII_18845_1_18845_3_1	2.39394	4.41421e-05	3.05127e-10	Q.[UNIMOD:27]EVNILK[UNIMOD:56]K[UNIMOD:56]TLEEEAK[UNIMOD:56]THEAQIQEMR.Q	sp|P35579|MYH9_HUMAN
U87MG_100ug_NHS_Rep1_5Frac_Frac-3_SII_21880_1_21880_3_1	2.39339	4.41421e-05	3.06571e-10	R.[UNIMOD:56]ALTVPELTQQVFDAK[UNIMOD:56]NMMAAC[UNIMOD:4]DPR.H	sp|P07437|TBB5_HUMAN
U87MG_100ug_NHS_Rep1_5Frac_Frac-3_SII_21635_1_21635_3_1	2.3929	4.41421e-05	3.07868e-10	-.[UNIMOD:1]ALHVPK[UNIMOD:56]APGFAQMLK[UNIMOD:56]EGAK[UNIMOD:56]HFSGLEEAVYR.N	sp|P50990|TCPQ_HUMAN
U87MG_100ug_NHS_Rep1_5Frac_Frac-4_SII_14454_1_14454_3_1	2.39288	4.41421e-05	3.07921e-10	R.DGEDQTQDTELVETRPAGDGTFQK[UNIMOD:56]WAAVVVPSGQEQR.Y	sp|P10321|1C07_HUMAN
U87MG_100ug_NHS_Rep1_5Frac_Frac-4_SII_18702_1_18702_3_1	2.39223	4.41421e-05	3.09607e-10	C.[UNIMOD:27]EQALAAEPK[UNIMOD:56]AK[UNIMOD:56]DPFAHLPK[UNIMOD:56]STFVLDEFK[UNIMOD:56]R.K	sp|P26641|EF1G_HUMAN
U87MG_100ug_NHS_Rep1_5Frac_Frac-5_SII_19361_1_19361_2_1	2.38986	4.41421e-05	3.15947e-10	R.[UNIMOD:56]TIC[UNIMOD:4]SHVQNMIK[UNIMOD:56]GVTLGFR.Y	sp|P32969|RL9_HUMAN
U87MG_100ug_NHS_Rep1_5Frac_Frac-4_SII_12259_1_12259_3_1	2.38919	4.41421e-05	3.17748e-10	R.FHVEEEGK[UNIMOD:56]GK[UNIMOD:56]DASGNK[UNIMOD:56]VK[UNIMOD:56]AEPAK[UNIMOD:56]IEAFR.A	sp|P00558|PGK1_HUMAN
U87MG_100ug_NHS_Rep1_5Frac_Frac-1_SII_15414_1_15414_3_1	2.38879	4.41421e-05	3.18837e-10	E.[UNIMOD:27]EK[UNIMOD:56]SK[UNIMOD:56]SLAK[UNIMOD:56]LK[UNIMOD:56]NK[UNIMOD:56]HEAMITDLEER.L	sp|P35579|MYH9_HUMAN
U87MG_100ug_NHS_Rep1_5Frac_Frac-5_SII_15073_1_15073_2_1	2.38824	4.41421e-05	3.2032e-10	R.AEEYEFLTPVEEAPK[UNIMOD:56]GMLAR.G	sp|P52565|GDIR1_HUMAN
U87MG_100ug_NHS_Rep1_5Frac_Frac-1_SII_16156_1_16156_3_1	2.38779	4.41421e-05	3.21564e-10	R.TATESFASDPILYRPVAVALDTK[UNIMOD:56]GPEIR.T	sp|P14618|KPYM_HUMAN
U87MG_100ug_NHS_Rep1_5Frac_Frac-5_SII_14726_1_14726_3_1	2.38755	4.41421e-05	3.22228e-10	R.VLQALEGLK[UNIMOD:56]MVEK[UNIMOD:56]DQDGGR.K	sp|P39019|RS19_HUMAN
U87MG_100ug_NHS_Rep1_5Frac_Frac-2_SII_14409_1_14409_3_1	2.38663	4.41421e-05	3.24746e-10	R.[UNIMOD:56]VHVSEEGTEPEAMLQVLGPK[UNIMOD:56]PALPAGTEDTAK[UNIMOD:56]EDAANR.K	sp|P06396|GELS_HUMAN
U87MG_100ug_NHS_Rep1_5Frac_Frac-1_SII_15150_1_15150_3_1	2.38659	4.41421e-05	3.24858e-10	-.[UNIMOD:1]MEGVEEK[UNIMOD:56]K[UNIMOD:56]K[UNIMOD:56]EVPAVPETLK[UNIMOD:56]K[UNIMOD:56]K[UNIMOD:56]R.R	sp|P18124|RL7_HUMAN
U87MG_100ug_NHS_Rep1_5Frac_Frac-1_SII_17210_1_17210_3_1	2.38527	4.41421e-05	3.28544e-10	R.EQEVNILK[UNIMOD:56]K[UNIMOD:56]TLEEEAK[UNIMOD:56]THEAQIQEMR.Q	sp|P35579|MYH9_HUMAN
U87MG_100ug_NHS_Rep1_5Frac_Frac-2_SII_16528_1_16528_2_1	2.38433	4.41421e-05	3.31184e-10	R.ETVVEVPQVTWEDIGGLEDVK[UNIMOD:56]R.E	sp|P55072|TERA_HUMAN
U87MG_100ug_NHS_Rep1_5Frac_Frac-4_SII_24358_1_24358_3_1	2.38423	4.41421e-05	3.31452e-10	-.[UNIMOD:1]DDDIAALVVDNGSGMC[UNIMOD:4]K[UNIMOD:56]AGFAGDDAPR.A	sp|P60709|ACTB_HUMAN
U87MG_100ug_NHS_Rep1_5Frac_Frac-1_SII_17206_1_17206_3_1	2.3828	4.41421e-05	3.35534e-10	H.[UNIMOD:56]SEAGTAFIQTQQLHAAMADTFLEHMC[UNIMOD:4]R.L	sp|P14618|KPYM_HUMAN
U87MG_100ug_NHS_Rep1_5Frac_Frac-4_SII_7466_1_7466_4_1	2.37988	4.41421e-05	3.43979e-10	R.HQGVMVGMGQK[UNIMOD:56]DSYVGDEAQSK[UNIMOD:56]R.G	sp|P60709|ACTB_HUMAN
U87MG_100ug_NHS_Rep1_5Frac_Frac-1_SII_10356_1_10356_3_1	2.37882	4.41421e-05	3.471e-10	-.[UNIMOD:1]SAADEVDGLGVARPHYGSVLDNER.L	sp|P46940|IQGA1_HUMAN
U87MG_100ug_NHS_Rep1_5Frac_Frac-3_SII_15900_1_15900_3_1	2.37779	4.41421e-05	3.50175e-10	R.EQIC[UNIMOD:4]EVEEGDK[UNIMOD:56]PDVDK[UNIMOD:56]AVEAAQVAFQR.G	sp|P47895|AL1A3_HUMAN
U87MG_100ug_NHS_Rep1_5Frac_Frac-5_SII_14785_1_14785_2_1	2.37624	4.41421e-05	3.5483e-10	R.NAFAC[UNIMOD:4]FDEEATGTIQEDYLR.E	sp|O14950|ML12B_HUMAN
U87MG_100ug_NHS_Rep1_5Frac_Frac-1_SII_13325_1_13325_3_1	2.37541	4.41421e-05	3.57344e-10	R.TEMEDLMSSK[UNIMOD:56]DDVGK[UNIMOD:56]SVHELEK[UNIMOD:56]SK[UNIMOD:56]R.A	sp|P35579|MYH9_HUMAN
U87MG_100ug_NHS_Rep1_5Frac_Frac-5_SII_23019_1_23019_3_1	2.37513	4.41421e-05	3.58209e-10	-.[UNIMOD:56]GK[UNIMOD:56]IALQLK[UNIMOD:56]ATLENITNLRPVGEDFR.W	sp|Q9NWV4|CA123_HUMAN
U87MG_100ug_NHS_Rep1_5Frac_Frac-2_SII_18370_1_18370_3_1	2.37428	4.41421e-05	3.60794e-10	R.[UNIMOD:56]SNTGGQAFPQC[UNIMOD:4]VFDHWQILPGDPFDNSSRPSQVVAETR.K	sp|P13639|EF2_HUMAN
U87MG_100ug_NHS_Rep1_5Frac_Frac-2_SII_15428_1_15428_3_1	2.37337	4.41421e-05	3.63594e-10	R.[UNIMOD:56]SIFGEDALANVSIEK[UNIMOD:56]PIHQGPDAAVTGHIR.I	sp|P53618|COPB_HUMAN
U87MG_100ug_NHS_Rep1_5Frac_Frac-2_SII_10189_1_10189_3_1	2.37112	4.41421e-05	3.70654e-10	R.FQNVAK[UNIMOD:56]EGVK[UNIMOD:56]FDESEK[UNIMOD:56]TK[UNIMOD:56]ESR.E	sp|P14625|ENPL_HUMAN
U87MG_100ug_NHS_Rep1_5Frac_Frac-2_SII_21675_1_21675_3_1	2.37096	4.41421e-05	3.71147e-10	R.[UNIMOD:56]SGVSLAALK[UNIMOD:56]K[UNIMOD:56]ALAAAGYDVEK[UNIMOD:56]NNSR.I	sp|P16403|H12_HUMAN
U87MG_100ug_NHS_Rep1_5Frac_Frac-4_SII_13471_1_13471_3_1	2.37095	4.41421e-05	3.71186e-10	R.FHVEEEGK[UNIMOD:56]GK[UNIMOD:56]DASGNK[UNIMOD:56]VK[UNIMOD:56]AEPAK[UNIMOD:56]IEAFR.A	sp|P00558|PGK1_HUMAN
U87MG_100ug_NHS_Rep1_5Frac_Frac-2_SII_18321_1_18321_3_1	2.3699	4.41421e-05	3.74519e-10	R.[UNIMOD:56]SNTGGQAFPQC[UNIMOD:4]VFDHWQILPGDPFDNSSRPSQVVAETR.K	sp|P13639|EF2_HUMAN
U87MG_100ug_NHS_Rep1_5Frac_Frac-5_SII_16690_1_16690_3_1	2.36952	4.41421e-05	3.75749e-10	A.[UNIMOD:27]EAK[UNIMOD:56]AK[UNIMOD:56]ALK[UNIMOD:56]AK[UNIMOD:56]K[UNIMOD:56]AVLK[UNIMOD:56]GVHSHK[UNIMOD:56]K[UNIMOD:56]K[UNIMOD:56]K[UNIMOD:56]IR.T	sp|P62750|RL23A_HUMAN
U87MG_100ug_NHS_Rep1_5Frac_Frac-4_SII_13264_1_13264_2_1	2.36895	4.41421e-05	3.77554e-10	A.[UNIMOD:56]HSLLPVDDAINGLSEEQR.Q	sp|P26440|IVD_HUMAN
U87MG_100ug_NHS_Rep1_5Frac_Frac-4_SII_16478_1_16478_2_1	2.36891	4.41421e-05	3.77688e-10	-.[UNIMOD:1]DDDIAALVVDNGSGMC[UNIMOD:4]K[UNIMOD:56]AGFAGDDAPR.A	sp|P60709|ACTB_HUMAN
U87MG_100ug_NHS_Rep1_5Frac_Frac-1_SII_13619_1_13619_2_1	2.36851	4.41421e-05	3.78976e-10	R.LNEAAAGLNQAATELVQASR.G	sp|Q9Y490|TLN1_HUMAN
U87MG_100ug_NHS_Rep1_5Frac_Frac-4_SII_14486_1_14486_3_1	2.36814	4.41421e-05	3.80197e-10	R.DGEDQTQDTELVETRPAGDGTFQK[UNIMOD:56]WAAVVVPSGQEQR.Y	sp|P10321|1C07_HUMAN
U87MG_100ug_NHS_Rep1_5Frac_Frac-5_SII_21971_1_21971_3_1	2.36799	4.41421e-05	3.80655e-10	-.[UNIMOD:1]ASGVAVSDGVIK[UNIMOD:56]VFNDMK[UNIMOD:56]VR.K	sp|P23528|COF1_HUMAN
U87MG_100ug_NHS_Rep1_5Frac_Frac-4_SII_17276_1_17276_3_1	2.36795	4.41421e-05	3.80788e-10	R.FHVEEEGK[UNIMOD:56]GK[UNIMOD:56]DASGNK[UNIMOD:56]VK[UNIMOD:56]AEPAK[UNIMOD:56]IEAFR.A	sp|P00558|PGK1_HUMAN
U87MG_100ug_NHS_Rep1_5Frac_Frac-5_SII_14996_1_14996_2_1	2.36782	4.41421e-05	3.81219e-10	R.AEEYEFLTPVEEAPK[UNIMOD:56]GMLAR.G	sp|P52565|GDIR1_HUMAN
U87MG_100ug_NHS_Rep1_5Frac_Frac-4_SII_12997_1_12997_3_1	2.36778	4.41421e-05	3.81356e-10	R.FHVEEEGK[UNIMOD:56]GK[UNIMOD:56]DASGNK[UNIMOD:56]VK[UNIMOD:56]AEPAK[UNIMOD:56]IEAFR.A	sp|P00558|PGK1_HUMAN
U87MG_100ug_NHS_Rep1_5Frac_Frac-4_SII_14352_1_14352_3_1	2.36581	4.41421e-05	3.87809e-10	R.FHVEEEGK[UNIMOD:56]GK[UNIMOD:56]DASGNK[UNIMOD:56]VK[UNIMOD:56]AEPAK[UNIMOD:56]IEAFR.A	sp|P00558|PGK1_HUMAN
U87MG_100ug_NHS_Rep1_5Frac_Frac-5_SII_7762_1_7762_3_1	2.36517	4.41421e-05	3.89942e-10	K.SAPAPK[UNIMOD:56]K[UNIMOD:56]GSK[UNIMOD:56]K[UNIMOD:56]AVTK[UNIMOD:56]AQK[UNIMOD:56]K[UNIMOD:56]DGK[UNIMOD:56]K[UNIMOD:56]R.K	sp|P62807|H2B1C_HUMAN
U87MG_100ug_NHS_Rep1_5Frac_Frac-4_SII_16254_1_16254_2_1	2.36501	4.41421e-05	3.90459e-10	-.[UNIMOD:1]DDDIAALVVDNGSGMC[UNIMOD:4]K[UNIMOD:56]AGFAGDDAPR.A	sp|P60709|ACTB_HUMAN
U87MG_100ug_NHS_Rep1_5Frac_Frac-3_SII_22974_1_22974_3_1	2.36376	4.41421e-05	3.94636e-10	R.[UNIMOD:56]GLK[UNIMOD:56]MAVTFIGNSTAIQELFK[UNIMOD:56]R.I	sp|P07437|TBB5_HUMAN
U87MG_100ug_NHS_Rep1_5Frac_Frac-5_SII_17883_1_17883_3_1	2.36324	4.41421e-05	3.96394e-10	Q.[UNIMOD:27]EMQLK[UNIMOD:56]EAK[UNIMOD:56]HIAEEADRK[UNIMOD:56]YEEVAR.K	sp|P67936|TPM4_HUMAN
U87MG_100ug_NHS_Rep1_5Frac_Frac-1_SII_13547_1_13547_3_1	2.36313	4.41421e-05	3.96781e-10	R.[UNIMOD:28]QTATQLLK[UNIMOD:56]LAHK[UNIMOD:56]YRPETK[UNIMOD:56]QEK[UNIMOD:56]K[UNIMOD:56]QR.L	sp|P62424|RL7A_HUMAN
U87MG_100ug_NHS_Rep1_5Frac_Frac-5_SII_21111_1_21111_3_1	2.36312	4.41421e-05	3.96805e-10	-.[UNIMOD:1]SEK[UNIMOD:56]SVEAAAELSAK[UNIMOD:56]DLK[UNIMOD:56]EK[UNIMOD:56]K[UNIMOD:56]EK[UNIMOD:56]VEEK[UNIMOD:56]ASR.K	sp|P20962|PTMS_HUMAN
U87MG_100ug_NHS_Rep1_5Frac_Frac-1_SII_14877_1_14877_3_1	2.36227	4.41421e-05	3.99668e-10	R.[UNIMOD:28][UNIMOD:56]QK[UNIMOD:56]ASIHEAWTDGK[UNIMOD:56]EAMLK[UNIMOD:56]HR.D	sp|O43707|ACTN4_HUMAN
U87MG_100ug_NHS_Rep1_5Frac_Frac-3_SII_14951_1_14951_2_1	2.36216	4.41421e-05	4.00047e-10	R.[UNIMOD:56]QLFHPEQLITGK[UNIMOD:56]EDAANNYAR.G	sp|P68363|TBA1B_HUMAN
U87MG_100ug_NHS_Rep1_5Frac_Frac-5_SII_14717_1_14717_2_1	2.36203	4.41421e-05	4.00516e-10	R.NAFAC[UNIMOD:4]FDEEATGTIQEDYLR.E	sp|O14950|ML12B_HUMAN
U87MG_100ug_NHS_Rep1_5Frac_Frac-4_SII_12274_1_12274_3_1	2.36197	4.41421e-05	4.00698e-10	R.FHVEEEGK[UNIMOD:56]GK[UNIMOD:56]DASGNK[UNIMOD:56]VK[UNIMOD:56]AEPAK[UNIMOD:56]IEAFR.A	sp|P00558|PGK1_HUMAN
U87MG_100ug_NHS_Rep1_5Frac_Frac-3_SII_8570_1_8570_3_1	2.36165	4.41421e-05	4.01805e-10	R.NDTK[UNIMOD:56]EDVFVHQTAIK[UNIMOD:56]K[UNIMOD:56]NNPR.K	sp|P67809|YBOX1_HUMAN
U87MG_100ug_NHS_Rep1_5Frac_Frac-4_SII_16040_1_16040_3_1	2.36075	4.41421e-05	4.04889e-10	-.[UNIMOD:1]DDDIAALVVDNGSGMC[UNIMOD:4]K[UNIMOD:56]AGFAGDDAPR.A	sp|P60709|ACTB_HUMAN
U87MG_100ug_NHS_Rep1_5Frac_Frac-5_SII_5272_1_5272_2_1	2.35839	4.41421e-05	4.13124e-10	R.K[UNIMOD:56]IQALQQQADEAEDR.A	sp|P67936|TPM4_HUMAN
U87MG_100ug_NHS_Rep1_5Frac_Frac-3_SII_16351_1_16351_4_1	2.35673	4.41421e-05	4.19e-10	-.[UNIMOD:1]SK[UNIMOD:56]PHSEAGTAFIQTQQLHAAMADTFLEHMC[UNIMOD:4]R.L	sp|P14618|KPYM_HUMAN
U87MG_100ug_NHS_Rep1_5Frac_Frac-4_SII_16447_1_16447_3_1	2.35664	4.41421e-05	4.19316e-10	-.[UNIMOD:1]DDDIAALVVDNGSGMC[UNIMOD:4]K[UNIMOD:56]AGFAGDDAPR.A	sp|P60709|ACTB_HUMAN
U87MG_100ug_NHS_Rep1_5Frac_Frac-2_SII_17342_1_17342_3_1	2.35653	4.41421e-05	4.19729e-10	R.VHLAEK[UNIMOD:56]GDGAELIWDK[UNIMOD:56]DDPSAMDFVTSAANLR.M	sp|Q9UBT2|SAE2_HUMAN
U87MG_100ug_NHS_Rep1_5Frac_Frac-5_SII_22926_1_22926_3_1	2.35623	4.41421e-05	4.20788e-10	R.[UNIMOD:56]GALQNIIPASTGAAK[UNIMOD:56]AVGK[UNIMOD:56]VIPELNGK[UNIMOD:56]LTGMAFR.V	sp|P04406|G3P_HUMAN
U87MG_100ug_NHS_Rep1_5Frac_Frac-2_SII_15296_1_15296_2_1	2.35466	4.41421e-05	4.26479e-10	R.[UNIMOD:56]SDK[UNIMOD:56]GNEFVVIHNGIITNYK[UNIMOD:56]DLR.K	sp|O94808|GFPT2_HUMAN
U87MG_100ug_NHS_Rep1_5Frac_Frac-5_SII_18828_1_18828_3_1	2.3532	4.41421e-05	4.31824e-10	-.[UNIMOD:1]ASMGTLAFDEYGRPFLIIK[UNIMOD:56]DQDR.K	sp|P48643|TCPE_HUMAN
U87MG_100ug_NHS_Rep1_5Frac_Frac-2_SII_8464_1_8464_3_1	2.35267	4.41421e-05	4.33759e-10	R.NDTK[UNIMOD:56]EDVFVHQTAIK[UNIMOD:56]K[UNIMOD:56]NNPR.K	sp|P67809|YBOX1_HUMAN
U87MG_100ug_NHS_Rep1_5Frac_Frac-4_SII_13625_1_13625_4_1	2.35229	4.41421e-05	4.35175e-10	R.[UNIMOD:27]EDSQRPGAHLTVK[UNIMOD:56]K[UNIMOD:56]IFVGGIK[UNIMOD:56]EDTEEHHLR.D	sp|P09651|ROA1_HUMAN
U87MG_100ug_NHS_Rep1_5Frac_Frac-2_SII_4682_1_4682_2_1	2.35215	4.41421e-05	4.35683e-10	R.AGNEK[UNIMOD:56]EEGETADTVGC[UNIMOD:4]C[UNIMOD:4]SLR.V	sp|P11387|TOP1_HUMAN
U87MG_100ug_NHS_Rep1_5Frac_Frac-4_SII_22622_1_22622_3_1	2.35105	4.41421e-05	4.39783e-10	R.FHVEEEGK[UNIMOD:56]GK[UNIMOD:56]DASGNK[UNIMOD:56]VK[UNIMOD:56]AEPAK[UNIMOD:56]IEAFR.A	sp|P00558|PGK1_HUMAN
U87MG_100ug_NHS_Rep1_5Frac_Frac-5_SII_12026_1_12026_3_1	2.35071	4.41421e-05	4.4105e-10	-.[UNIMOD:56]PDPAK[UNIMOD:56]SAPAPK[UNIMOD:56]K[UNIMOD:56]GSK[UNIMOD:56]K[UNIMOD:56]AVTK[UNIMOD:56]VQK[UNIMOD:56]K[UNIMOD:56]DGK[UNIMOD:56]K[UNIMOD:56]R.K	sp|Q5QNW6|H2B2F_HUMAN
U87MG_100ug_NHS_Rep1_5Frac_Frac-5_SII_21144_1_21144_3_1	2.35044	4.41421e-05	4.42078e-10	-.[UNIMOD:1]ASGVAVSDGVIK[UNIMOD:56]VFNDMK[UNIMOD:56]VR.K	sp|P23528|COF1_HUMAN
U87MG_100ug_NHS_Rep1_5Frac_Frac-3_SII_15009_1_15009_3_1	2.3502	4.41421e-05	4.42999e-10	R.TEMEDLMSSK[UNIMOD:56]DDVGK[UNIMOD:56]SVHELEK[UNIMOD:56]SK[UNIMOD:56]R.A	sp|P35579|MYH9_HUMAN
U87MG_100ug_NHS_Rep1_5Frac_Frac-4_SII_10194_1_10194_3_1	2.34976	4.41421e-05	4.44636e-10	-.[UNIMOD:1]SSTQFNK[UNIMOD:56]GPSYGLSAEVK[UNIMOD:56]NR.L	sp|Q99439|CNN2_HUMAN
U87MG_100ug_NHS_Rep1_5Frac_Frac-3_SII_15809_1_15809_2_1	2.34934	4.41421e-05	4.46251e-10	R.[UNIMOD:28]QVQSLTC[UNIMOD:4]EVDALK[UNIMOD:56]GTNESLER.Q	sp|P08670|VIME_HUMAN
U87MG_100ug_NHS_Rep1_5Frac_Frac-4_SII_12220_1_12220_3_1	2.34904	4.41421e-05	4.47405e-10	R.FHVEEEGK[UNIMOD:56]GK[UNIMOD:56]DASGNK[UNIMOD:56]VK[UNIMOD:56]AEPAK[UNIMOD:56]IEAFR.A	sp|P00558|PGK1_HUMAN
U87MG_100ug_NHS_Rep1_5Frac_Frac-5_SII_13943_1_13943_3_1	2.34787	4.41421e-05	4.51881e-10	N.[UNIMOD:27]EEDEHSVNYK[UNIMOD:56]PPAQK[UNIMOD:56]SIQEIQELDK[UNIMOD:56]DDESLR.K	sp|P52565|GDIR1_HUMAN
U87MG_100ug_NHS_Rep1_5Frac_Frac-5_SII_7907_1_7907_3_1	2.34747	4.41421e-05	4.53399e-10	-.[UNIMOD:1]PEPAK[UNIMOD:56]SAPAPK[UNIMOD:56]K[UNIMOD:56]GSK[UNIMOD:56]K[UNIMOD:56]AVTK[UNIMOD:56]AQK[UNIMOD:56]K[UNIMOD:56]DGK[UNIMOD:56]K[UNIMOD:56]R.K	sp|P62807|H2B1C_HUMAN
U87MG_100ug_NHS_Rep1_5Frac_Frac-4_SII_11807_1_11807_3_1	2.34717	4.41421e-05	4.54576e-10	R.FHVEEEGK[UNIMOD:56]GK[UNIMOD:56]DASGNK[UNIMOD:56]VK[UNIMOD:56]AEPAK[UNIMOD:56]IEAFR.A	sp|P00558|PGK1_HUMAN
U87MG_100ug_NHS_Rep1_5Frac_Frac-4_SII_15970_1_15970_2_1	2.34685	4.41421e-05	4.55837e-10	R.MQK[UNIMOD:56]EITALAPSTMK[UNIMOD:56]IK[UNIMOD:56]IIAPPER.K	sp|P60709|ACTB_HUMAN
U87MG_100ug_NHS_Rep1_5Frac_Frac-2_SII_18585_1_18585_3_1	2.34512	4.41421e-05	4.62607e-10	R.[UNIMOD:56]ALQASALK[UNIMOD:56]AWGGK[UNIMOD:56]K[UNIMOD:56]ENLK[UNIMOD:56]AAQEEYVK[UNIMOD:56]R.A	sp|P04075|ALDOA_HUMAN
U87MG_100ug_NHS_Rep1_5Frac_Frac-4_SII_13530_1_13530_3_1	2.34501	4.41421e-05	4.63011e-10	R.FHVEEEGK[UNIMOD:56]GK[UNIMOD:56]DASGNK[UNIMOD:56]VK[UNIMOD:56]AEPAK[UNIMOD:56]IEAFR.A	sp|P00558|PGK1_HUMAN
U87MG_100ug_NHS_Rep1_5Frac_Frac-5_SII_13775_1_13775_3_1	2.34478	4.41421e-05	4.63945e-10	R.[UNIMOD:56]K[UNIMOD:56]FYK[UNIMOD:56]GK[UNIMOD:56]K[UNIMOD:56]YK[UNIMOD:56]PLDLRPK[UNIMOD:56]K[UNIMOD:56]TR.A	sp|P42766|RL35_HUMAN
U87MG_100ug_NHS_Rep1_5Frac_Frac-5_SII_22096_1_22096_3_1	2.34471	4.41421e-05	4.64191e-10	-.[UNIMOD:56]MK[UNIMOD:56]PLVVFVLGGPGAGK[UNIMOD:56]GTQC[UNIMOD:4]AR.I	sp|P30085|KCY_HUMAN
U87MG_100ug_NHS_Rep1_5Frac_Frac-4_SII_15897_1_15897_2_1	2.34459	4.41421e-05	4.64667e-10	-.[UNIMOD:1]DDDIAALVVDNGSGMC[UNIMOD:4]K[UNIMOD:56]AGFAGDDAPR.A	sp|P60709|ACTB_HUMAN
U87MG_100ug_NHS_Rep1_5Frac_Frac-5_SII_18088_1_18088_3_1	2.34201	4.41421e-05	4.75e-10	R.[UNIMOD:28]QK[UNIMOD:56]DVK[UNIMOD:56]DGK[UNIMOD:56]YSQVLANGLDNK[UNIMOD:56]LREDLER.L	sp|P62269|RS18_HUMAN
U87MG_100ug_NHS_Rep1_5Frac_Frac-5_SII_19814_1_19814_3_1	2.3413	4.41421e-05	4.77884e-10	-.[UNIMOD:1]ASGVAVSDGVIK[UNIMOD:56]VFNDMK[UNIMOD:56]VR.K	sp|P23528|COF1_HUMAN
U87MG_100ug_NHS_Rep1_5Frac_Frac-3_SII_9223_1_9223_4_1	2.34121	4.41421e-05	4.78249e-10	R.[UNIMOD:56]HQGVMVGMGQK[UNIMOD:56]DSYVGDEAQSK[UNIMOD:56]R.G	sp|P60709|ACTB_HUMAN
U87MG_100ug_NHS_Rep1_5Frac_Frac-2_SII_22858_1_22858_3_1	2.34072	4.41421e-05	4.80271e-10	-.[UNIMOD:1]SAK[UNIMOD:56]AISEQTGK[UNIMOD:56]ELLYK[UNIMOD:56]FIC[UNIMOD:4]TTSAIQNR.F	sp|P53396|ACLY_HUMAN
U87MG_100ug_NHS_Rep1_5Frac_Frac-2_SII_18250_1_18250_3_1	2.34041	4.41421e-05	4.81527e-10	R.[UNIMOD:56]SNTGGQAFPQC[UNIMOD:4]VFDHWQILPGDPFDNSSRPSQVVAETR.K	sp|P13639|EF2_HUMAN
U87MG_100ug_NHS_Rep1_5Frac_Frac-2_SII_20672_1_20672_3_1	2.34029	4.41421e-05	4.82028e-10	R.[UNIMOD:56]TVEVEK[UNIMOD:56]VHLEK[UNIMOD:56]K[UNIMOD:56]LRDEINLAK[UNIMOD:56]QEAQR.L	sp|Q13586|STIM1_HUMAN
U87MG_100ug_NHS_Rep1_5Frac_Frac-4_SII_17625_1_17625_3_1	2.33941	4.41421e-05	4.85669e-10	-.[UNIMOD:56]PHIDNDVK[UNIMOD:56]LDFK[UNIMOD:56]DVLLRPK[UNIMOD:56]R.S	sp|Q9P2T1|GMPR2_HUMAN
U87MG_100ug_NHS_Rep1_5Frac_Frac-3_SII_22005_1_22005_3_1	2.33876	4.41421e-05	4.88368e-10	R.[UNIMOD:56]GLK[UNIMOD:56]MSATFIGNSTAIQELFK[UNIMOD:56]R.I	sp|P68371|TBB4B_HUMAN
U87MG_100ug_NHS_Rep1_5Frac_Frac-2_SII_22684_1_22684_3_1	2.33728	4.41421e-05	4.94538e-10	R.WLPAGDALLQMITIHLPSPVTAQK[UNIMOD:56]YR.C	sp|P13639|EF2_HUMAN
U87MG_100ug_NHS_Rep1_5Frac_Frac-4_SII_15509_1_15509_3_1	2.33627	4.41421e-05	4.98843e-10	R.[UNIMOD:56]GVAGAHGLLC[UNIMOD:4]LLSDHVDK[UNIMOD:56]R.I	sp|Q9UBQ7|GRHPR_HUMAN
U87MG_100ug_NHS_Rep1_5Frac_Frac-1_SII_8707_1_8707_2_1	2.33621	4.41421e-05	4.99104e-10	R.[UNIMOD:56]SPFPVHVSEAC[UNIMOD:4]NPNAC[UNIMOD:4]R.A	sp|Q14315|FLNC_HUMAN
U87MG_100ug_NHS_Rep1_5Frac_Frac-4_SII_15831_1_15831_3_1	2.33586	4.41421e-05	5.00572e-10	-.[UNIMOD:1]DDDIAALVVDNGSGMC[UNIMOD:4]K[UNIMOD:56]AGFAGDDAPR.A	sp|P60709|ACTB_HUMAN
U87MG_100ug_NHS_Rep1_5Frac_Frac-3_SII_15019_1_15019_3_1	2.33558	4.41421e-05	5.01792e-10	A.[UNIMOD:27]EEFGNETWGVTK[UNIMOD:56]AAEK[UNIMOD:56]QMK[UNIMOD:56]DK[UNIMOD:56]QDEEQR.L	sp|P27797|CALR_HUMAN
U87MG_100ug_NHS_Rep1_5Frac_Frac-3_SII_13860_1_13860_4_1	2.33501	4.41421e-05	5.04234e-10	-.[UNIMOD:1]SK[UNIMOD:56]PHSEAGTAFIQTQQLHAAMADTFLEHM[UNIMOD:35]C[UNIMOD:4]R.L	sp|P14618|KPYM_HUMAN
U87MG_100ug_NHS_Rep1_5Frac_Frac-4_SII_10372_1_10372_2_1	2.33482	4.41421e-05	5.05018e-10	R.AHQVVEDGYEFFAK[UNIMOD:56]R.Q	sp|P62140|PP1B_HUMAN
U87MG_100ug_NHS_Rep1_5Frac_Frac-4_SII_14483_1_14483_2_1	2.33375	4.41421e-05	5.09665e-10	R.[UNIMOD:28][UNIMOD:56]QLFHPEQLITGK[UNIMOD:56]EDAANNYAR.G	sp|P68363|TBA1B_HUMAN
U87MG_100ug_NHS_Rep1_5Frac_Frac-4_SII_8222_1_8222_3_1	2.33004	4.41421e-05	5.26047e-10	R.[UNIMOD:56]HQGVMVGMGQK[UNIMOD:56]DSYVGDEAQSK[UNIMOD:56]R.G	sp|P60709|ACTB_HUMAN
U87MG_100ug_NHS_Rep1_5Frac_Frac-4_SII_16134_1_16134_2_1	2.32995	4.41421e-05	5.26454e-10	-.[UNIMOD:1]DDDIAALVVDNGSGMC[UNIMOD:4]K[UNIMOD:56]AGFAGDDAPR.A	sp|P60709|ACTB_HUMAN
U87MG_100ug_NHS_Rep1_5Frac_Frac-1_SII_19439_1_19439_3_1	2.32952	4.41421e-05	5.28365e-10	-.[UNIMOD:1]SSSPVNVK[UNIMOD:56]K[UNIMOD:56]LK[UNIMOD:56]VSELK[UNIMOD:56]EELK[UNIMOD:56]K[UNIMOD:56]R.R	sp|Q00839|HNRPU_HUMAN
U87MG_100ug_NHS_Rep1_5Frac_Frac-2_SII_22104_1_22104_3_1	2.32928	4.41421e-05	5.29456e-10	R.[UNIMOD:56]AVHANPPTLLLPVAHMLEVGDPDDLAFLR.K	sp|Q13724|MOGS_HUMAN
U87MG_100ug_NHS_Rep1_5Frac_Frac-4_SII_12501_1_12501_3_1	2.3284	4.41421e-05	5.33453e-10	R.FHVEEEGK[UNIMOD:56]GK[UNIMOD:56]DASGNK[UNIMOD:56]VK[UNIMOD:56]AEPAK[UNIMOD:56]IEAFR.A	sp|P00558|PGK1_HUMAN
U87MG_100ug_NHS_Rep1_5Frac_Frac-1_SII_14163_1_14163_2_1	2.32806	4.41421e-05	5.34968e-10	R.[UNIMOD:28]QK[UNIMOD:56]HSQAVEELAEQLEQTK[UNIMOD:56]R.V	sp|P35579|MYH9_HUMAN
U87MG_100ug_NHS_Rep1_5Frac_Frac-5_SII_13454_1_13454_4_1	2.32758	4.41421e-05	5.37161e-10	R.TQK[UNIMOD:56]EIEQEAAVELSQLRDPQHDLDR.V	sp|P47985|UCRI_HUMAN
U87MG_100ug_NHS_Rep1_5Frac_Frac-3_SII_16040_1_16040_3_1	2.32736	4.41421e-05	5.38199e-10	G.[UNIMOD:27]EVIVTK[UNIMOD:56]DDAMLLK[UNIMOD:56]GK[UNIMOD:56]GDK[UNIMOD:56]AQIEK[UNIMOD:56]R.I	sp|P10809|CH60_HUMAN
U87MG_100ug_NHS_Rep1_5Frac_Frac-5_SII_13016_1_13016_3_1	2.32635	4.41421e-05	5.4284e-10	R.NALLSLAK[UNIMOD:56]GDRSEDFGVNEDLADSDAR.A	sp|P04083|ANXA1_HUMAN
U87MG_100ug_NHS_Rep1_5Frac_Frac-5_SII_17785_1_17785_2_1	2.32575	4.41421e-05	5.45634e-10	R.TDITYPAGFMDVISIDK[UNIMOD:56]TGENFR.L	sp|P62701|RS4X_HUMAN
U87MG_100ug_NHS_Rep1_5Frac_Frac-5_SII_13325_1_13325_3_1	2.32554	4.41421e-05	5.46606e-10	R.[UNIMOD:28]QTATQLLK[UNIMOD:56]LAHK[UNIMOD:56]YRPETK[UNIMOD:56]QEK[UNIMOD:56]K[UNIMOD:56]QR.L	sp|P62424|RL7A_HUMAN
U87MG_100ug_NHS_Rep1_5Frac_Frac-1_SII_17540_1_17540_3_1	2.32452	4.41421e-05	5.51361e-10	R.[UNIMOD:56]SGHFEQAIK[UNIMOD:56]EGEDMIAEEHFGSEK[UNIMOD:56]IR.E	sp|Q01082|SPTB2_HUMAN
U87MG_100ug_NHS_Rep1_5Frac_Frac-5_SII_9903_1_9903_3_1	2.32434	4.41421e-05	5.52221e-10	R.[UNIMOD:56]TLVVHEK[UNIMOD:56]ADDLGK[UNIMOD:56]GGNEESTK[UNIMOD:56]TGNAGSR.L	sp|P00441|SODC_HUMAN
U87MG_100ug_NHS_Rep1_5Frac_Frac-5_SII_20320_1_20320_3_1	2.3238	4.41421e-05	5.54748e-10	-.[UNIMOD:1]ASGVTVNDEVIK[UNIMOD:56]VFNDMK[UNIMOD:56]VR.K	sp|Q9Y281|COF2_HUMAN
U87MG_100ug_NHS_Rep1_5Frac_Frac-5_SII_14073_1_14073_3_1	2.32345	4.41421e-05	5.56425e-10	R.DDPSTIEK[UNIMOD:56]LAK[UNIMOD:56]NK[UNIMOD:56]QK[UNIMOD:56]PITPETAEK[UNIMOD:56]LAR.D	sp|P60953|CDC42_HUMAN
U87MG_100ug_NHS_Rep1_5Frac_Frac-4_SII_17182_1_17182_3_1	2.32331	4.41421e-05	5.57084e-10	R.FHVEEEGK[UNIMOD:56]GK[UNIMOD:56]DASGNK[UNIMOD:56]VK[UNIMOD:56]AEPAK[UNIMOD:56]IEAFR.A	sp|P00558|PGK1_HUMAN
U87MG_100ug_NHS_Rep1_5Frac_Frac-4_SII_19951_1_19951_4_1	2.3232	4.41421e-05	5.57588e-10	R.VK[UNIMOD:56]EK[UNIMOD:56]EAELK[UNIMOD:56]EAEK[UNIMOD:56]ELHEK[UNIMOD:56]FDLLK[UNIMOD:56]R.T	sp|Q9NVA2|SEP11_HUMAN
U87MG_100ug_NHS_Rep1_5Frac_Frac-2_SII_18912_1_18912_3_1	2.32141	4.41421e-05	5.66167e-10	R.[UNIMOD:27]EQEVNILK[UNIMOD:56]K[UNIMOD:56]TLEEEAK[UNIMOD:56]THEAQIQEMR.Q	sp|P35579|MYH9_HUMAN
U87MG_100ug_NHS_Rep1_5Frac_Frac-1_SII_15924_1_15924_3_1	2.32122	4.41421e-05	5.67087e-10	R.K[UNIMOD:56]K[UNIMOD:56]LEMDLK[UNIMOD:56]DLEAHIDSANK[UNIMOD:56]NR.D	sp|P35579|MYH9_HUMAN
U87MG_100ug_NHS_Rep1_5Frac_Frac-1_SII_7433_1_7433_3_1	2.32112	4.41421e-05	5.67594e-10	R.K[UNIMOD:56]ELK[UNIMOD:56]K[UNIMOD:56]DEGRK[UNIMOD:56]EEK[UNIMOD:56]K[UNIMOD:56]DAK[UNIMOD:56]K[UNIMOD:56]EEK[UNIMOD:56]R.K	sp|P78559|MAP1A_HUMAN
U87MG_100ug_NHS_Rep1_5Frac_Frac-4_SII_11611_1_11611_3_1	2.32105	4.41421e-05	5.67917e-10	R.FHVEEEGK[UNIMOD:56]GK[UNIMOD:56]DASGNK[UNIMOD:56]VK[UNIMOD:56]AEPAK[UNIMOD:56]IEAFR.A	sp|P00558|PGK1_HUMAN
U87MG_100ug_NHS_Rep1_5Frac_Frac-4_SII_18571_1_18571_3_1	2.32083	4.41421e-05	5.68996e-10	R.[UNIMOD:56]ALQASALK[UNIMOD:56]AWGGK[UNIMOD:56]K[UNIMOD:56]ENLK[UNIMOD:56]AAQEEYVK[UNIMOD:56]R.A	sp|P04075|ALDOA_HUMAN
U87MG_100ug_NHS_Rep1_5Frac_Frac-5_SII_20093_1_20093_3_1	2.32066	4.41421e-05	5.69808e-10	R.SK[UNIMOD:56]ESVPEFPLSPPK[UNIMOD:56]K[UNIMOD:56]K[UNIMOD:56]DLSLEEIQK[UNIMOD:56]K[UNIMOD:56]LEAAEER.R	sp|P16949|STMN1_HUMAN
U87MG_100ug_NHS_Rep1_5Frac_Frac-1_SII_12305_1_12305_3_1	2.32027	4.41421e-05	5.71686e-10	R.[UNIMOD:28][UNIMOD:56]QK[UNIMOD:56]QAADAEMEK[UNIMOD:56]HK[UNIMOD:56]K[UNIMOD:56]FAEQTLR.Q	sp|Q15149|PLEC_HUMAN
U87MG_100ug_NHS_Rep1_5Frac_Frac-5_SII_18320_1_18320_4_1	2.3197	4.41421e-05	5.74506e-10	-.[UNIMOD:1]ASNK[UNIMOD:56]TTLQK[UNIMOD:56]MGK[UNIMOD:56]K[UNIMOD:56]QNGK[UNIMOD:56]SK[UNIMOD:56]K[UNIMOD:56]VEEAEPEEFVVEK[UNIMOD:56]VLDRR.V	sp|Q13185|CBX3_HUMAN
U87MG_100ug_NHS_Rep1_5Frac_Frac-1_SII_15376_1_15376_2_1	2.31963	4.41421e-05	5.74819e-10	R.[UNIMOD:28][UNIMOD:56]QK[UNIMOD:56]HSQAVEELAEQLEQTK[UNIMOD:56]R.V	sp|P35579|MYH9_HUMAN
U87MG_100ug_NHS_Rep1_5Frac_Frac-4_SII_16833_1_16833_3_1	2.3187	4.41421e-05	5.79395e-10	-.[UNIMOD:1]DDDIAALVVDNGSGMC[UNIMOD:4]K[UNIMOD:56]AGFAGDDAPR.A	sp|P60709|ACTB_HUMAN
U87MG_100ug_NHS_Rep1_5Frac_Frac-5_SII_21353_1_21353_4_1	2.31739	4.41421e-05	5.85894e-10	R.VLMEK[UNIMOD:56]EFPGFLENQK[UNIMOD:56]DPLAVDK[UNIMOD:56]IMK[UNIMOD:56]DLDQC[UNIMOD:4]R.D	sp|P60903|S10AA_HUMAN
U87MG_100ug_NHS_Rep1_5Frac_Frac-4_SII_18768_1_18768_3_1	2.31712	4.41421e-05	5.87252e-10	C.[UNIMOD:27]EQALAAEPK[UNIMOD:56]AK[UNIMOD:56]DPFAHLPK[UNIMOD:56]STFVLDEFK[UNIMOD:56]R.K	sp|P26641|EF1G_HUMAN
U87MG_100ug_NHS_Rep1_5Frac_Frac-4_SII_18200_1_18200_3_1	2.31655	4.41421e-05	5.90135e-10	S.[UNIMOD:27]EK[UNIMOD:56]GESSGK[UNIMOD:56]NVTLPAVFK[UNIMOD:56]APIRPDIVNFVHTNLR.K	sp|P36578|RL4_HUMAN
U87MG_100ug_NHS_Rep1_5Frac_Frac-1_SII_13637_1_13637_2_1	2.31559	4.41421e-05	5.9495e-10	R.LK[UNIMOD:56]K[UNIMOD:56]ANLQIDQINTDLNLER.S	sp|P35579|MYH9_HUMAN
U87MG_100ug_NHS_Rep1_5Frac_Frac-5_SII_8827_1_8827_4_1	2.31479	4.41421e-05	5.99062e-10	-.[UNIMOD:1]PDPSK[UNIMOD:56]SAPAPK[UNIMOD:56]K[UNIMOD:56]GSK[UNIMOD:56]K[UNIMOD:56]AVTK[UNIMOD:56]AQK[UNIMOD:56]K[UNIMOD:56]DGK[UNIMOD:56]K[UNIMOD:56]R.K	sp|Q8N257|H2B3B_HUMAN
U87MG_100ug_NHS_Rep1_5Frac_Frac-4_SII_13351_1_13351_3_1	2.31259	4.41421e-05	6.10404e-10	R.FHVEEEGK[UNIMOD:56]GK[UNIMOD:56]DASGNK[UNIMOD:56]VK[UNIMOD:56]AEPAK[UNIMOD:56]IEAFR.A	sp|P00558|PGK1_HUMAN
U87MG_100ug_NHS_Rep1_5Frac_Frac-5_SII_12812_1_12812_2_1	2.31188	4.41421e-05	6.14087e-10	R.THSDQFLVAFK[UNIMOD:56]EVGR.K	sp|P36542|ATPG_HUMAN
U87MG_100ug_NHS_Rep1_5Frac_Frac-4_SII_12943_1_12943_3_1	2.31154	4.41421e-05	6.15842e-10	R.FHVEEEGK[UNIMOD:56]GK[UNIMOD:56]DASGNK[UNIMOD:56]VK[UNIMOD:56]AEPAK[UNIMOD:56]IEAFR.A	sp|P00558|PGK1_HUMAN
U87MG_100ug_NHS_Rep1_5Frac_Frac-4_SII_17047_1_17047_3_1	2.31093	4.41421e-05	6.19099e-10	R.FHVEEEGK[UNIMOD:56]GK[UNIMOD:56]DASGNK[UNIMOD:56]VK[UNIMOD:56]AEPAK[UNIMOD:56]IEAFR.A	sp|P00558|PGK1_HUMAN
U87MG_100ug_NHS_Rep1_5Frac_Frac-3_SII_22096_1_22096_3_1	2.31075	4.41421e-05	6.20037e-10	R.GQVAK[UNIMOD:56]LEAALGEAK[UNIMOD:56]K[UNIMOD:56]QLQDEMLR.R	sp|P02545|LMNA_HUMAN
U87MG_100ug_NHS_Rep1_5Frac_Frac-1_SII_11955_1_11955_3_1	2.31061	4.41421e-05	6.2078e-10	R.EK[UNIMOD:56]LQEEMLQREEAENTLQSFR.Q	sp|P08670|VIME_HUMAN
U87MG_100ug_NHS_Rep1_5Frac_Frac-5_SII_16756_1_16756_3_1	2.31013	4.41421e-05	6.23329e-10	-.[UNIMOD:1]SNPFLK[UNIMOD:56]QVFNK[UNIMOD:56]DK[UNIMOD:56]TFRPK[UNIMOD:56]R.K	sp|Q96BX8|MOB3A_HUMAN
U87MG_100ug_NHS_Rep1_5Frac_Frac-5_SII_21343_1_21343_3_1	2.30945	4.41421e-05	6.26952e-10	-.[UNIMOD:1]ASGVAVSDGVIK[UNIMOD:56]VFNDMK[UNIMOD:56]VR.K	sp|P23528|COF1_HUMAN
U87MG_100ug_NHS_Rep1_5Frac_Frac-3_SII_12963_1_12963_2_1	2.30738	4.41421e-05	6.38072e-10	L.[UNIMOD:27]EHSDC[UNIMOD:4]AFMVDNEAIYDIC[UNIMOD:4]R.R	sp|P68363|TBA1B_HUMAN
U87MG_100ug_NHS_Rep1_5Frac_Frac-4_SII_17589_1_17589_3_1	2.30719	4.41421e-05	6.39151e-10	-.[UNIMOD:56]PHIDNDVK[UNIMOD:56]LDFK[UNIMOD:56]DVLLRPK[UNIMOD:56]R.S	sp|Q9P2T1|GMPR2_HUMAN
U87MG_100ug_NHS_Rep1_5Frac_Frac-2_SII_14094_1_14094_3_1	2.30659	4.41421e-05	6.42383e-10	-.[UNIMOD:1]AAVQAAEVK[UNIMOD:56]VDGSEPK[UNIMOD:56]LSK[UNIMOD:56]NELK[UNIMOD:56]R.R	sp|Q15046|SYK_HUMAN
U87MG_100ug_NHS_Rep1_5Frac_Frac-2_SII_18486_1_18486_3_1	2.30461	4.41421e-05	6.53354e-10	R.[UNIMOD:56]SNTGGQAFPQC[UNIMOD:4]VFDHWQILPGDPFDNSSRPSQVVAETR.K	sp|P13639|EF2_HUMAN
U87MG_100ug_NHS_Rep1_5Frac_Frac-3_SII_21809_1_21809_3_1	2.30411	4.41421e-05	6.56099e-10	R.[UNIMOD:56]GLK[UNIMOD:56]MSATFIGNSTAIQELFK[UNIMOD:56]R.I	sp|P68371|TBB4B_HUMAN
U87MG_100ug_NHS_Rep1_5Frac_Frac-2_SII_9732_1_9732_3_1	2.30408	4.41421e-05	6.56301e-10	R.DEDDADYK[UNIMOD:56]PK[UNIMOD:56]K[UNIMOD:56]IK[UNIMOD:56]TEDTK[UNIMOD:56]K[UNIMOD:56]EK[UNIMOD:56]K[UNIMOD:56]R.K	sp|P11387|TOP1_HUMAN
U87MG_100ug_NHS_Rep1_5Frac_Frac-4_SII_16881_1_16881_2_1	2.30282	4.41421e-05	6.63406e-10	R.IDNDGDGFVTTEELK[UNIMOD:56]TWIK[UNIMOD:56]R.V	sp|Q15293|RCN1_HUMAN
U87MG_100ug_NHS_Rep1_5Frac_Frac-1_SII_5506_1_5506_2_1	2.3027	4.41421e-05	6.64083e-10	R.LK[UNIMOD:56]SEDGVEGDLGETQSR.T	sp|Q09666|AHNK_HUMAN
U87MG_100ug_NHS_Rep1_5Frac_Frac-5_SII_23064_1_23064_3_1	2.30234	4.41421e-05	6.66116e-10	-.[UNIMOD:1]ASGVAVSDGVIK[UNIMOD:56]VFNDMK[UNIMOD:56]VR.K	sp|P23528|COF1_HUMAN
U87MG_100ug_NHS_Rep1_5Frac_Frac-4_SII_16455_1_16455_2_1	2.30219	4.41421e-05	6.66933e-10	-.[UNIMOD:1]DDDIAALVVDNGSGMC[UNIMOD:4]K[UNIMOD:56]AGFAGDDAPR.A	sp|P60709|ACTB_HUMAN
U87MG_100ug_NHS_Rep1_5Frac_Frac-4_SII_11522_1_11522_3_1	2.30172	4.41421e-05	6.696e-10	R.FHVEEEGK[UNIMOD:56]GK[UNIMOD:56]DASGNK[UNIMOD:56]VK[UNIMOD:56]AEPAK[UNIMOD:56]IEAFR.A	sp|P00558|PGK1_HUMAN
U87MG_100ug_NHS_Rep1_5Frac_Frac-4_SII_21624_1_21624_3_1	2.30164	4.41421e-05	6.70098e-10	R.THTQDAVPLTLGQEFSGYVQQVK[UNIMOD:56]YAMTR.I	sp|P07954|FUMH_HUMAN
U87MG_100ug_NHS_Rep1_5Frac_Frac-3_SII_14415_1_14415_3_1	2.30125	4.41421e-05	6.723e-10	R.[UNIMOD:56]EMEENFAVEAANYQDTIGR.L	sp|P08670|VIME_HUMAN
U87MG_100ug_NHS_Rep1_5Frac_Frac-4_SII_11308_1_11308_2_1	2.2986	4.41421e-05	6.87689e-10	R.[UNIMOD:56]SELHIENLNMEADPGQYR.C	sp|P35613|BASI_HUMAN
U87MG_100ug_NHS_Rep1_5Frac_Frac-5_SII_20605_1_20605_3_1	2.29819	4.41421e-05	6.90091e-10	-.[UNIMOD:1]ASGVAVSDGVIK[UNIMOD:56]VFNDMK[UNIMOD:56]VR.K	sp|P23528|COF1_HUMAN
U87MG_100ug_NHS_Rep1_5Frac_Frac-5_SII_16042_1_16042_2_1	2.29806	4.41421e-05	6.9082e-10	R.K[UNIMOD:56]TVTAMDVVYALK[UNIMOD:56]R.Q	sp|P62805|H4_HUMAN
U87MG_100ug_NHS_Rep1_5Frac_Frac-2_SII_10862_1_10862_2_1	2.29639	4.41421e-05	7.00763e-10	R.FETK[UNIMOD:56]DISDIEGEK[UNIMOD:56]DGIR.K	sp|P52789|HXK2_HUMAN
U87MG_100ug_NHS_Rep1_5Frac_Frac-5_SII_17439_1_17439_3_1	2.29633	4.41421e-05	7.01075e-10	-.[UNIMOD:1]SDAAVDTSSEITTK[UNIMOD:56]DLK[UNIMOD:56]EK[UNIMOD:56]K[UNIMOD:56]EVVEEAENGR.D	sp|P06454|PTMA_HUMAN
U87MG_100ug_NHS_Rep1_5Frac_Frac-5_SII_12714_1_12714_2_1	2.29621	4.41421e-05	7.0182e-10	R.YDDMAAC[UNIMOD:4]MK[UNIMOD:56]SVTEQGAELSNEER.N	sp|P63104|1433Z_HUMAN
U87MG_100ug_NHS_Rep1_5Frac_Frac-4_SII_13833_1_13833_3_1	2.29572	4.41421e-05	7.04741e-10	R.FHVEEEGK[UNIMOD:56]GK[UNIMOD:56]DASGNK[UNIMOD:56]VK[UNIMOD:56]AEPAK[UNIMOD:56]IEAFR.A	sp|P00558|PGK1_HUMAN
U87MG_100ug_NHS_Rep1_5Frac_Frac-2_SII_4714_1_4714_2_1	2.29561	4.41421e-05	7.05424e-10	R.AGNEK[UNIMOD:56]EEGETADTVGC[UNIMOD:4]C[UNIMOD:4]SLR.V	sp|P11387|TOP1_HUMAN
U87MG_100ug_NHS_Rep1_5Frac_Frac-5_SII_20748_1_20748_3_1	2.29455	4.41421e-05	7.11805e-10	-.[UNIMOD:1]ASGVAVSDGVIK[UNIMOD:56]VFNDMK[UNIMOD:56]VR.K	sp|P23528|COF1_HUMAN
U87MG_100ug_NHS_Rep1_5Frac_Frac-2_SII_22114_1_22114_3_1	2.29436	4.41421e-05	7.13004e-10	R.[UNIMOD:56]AVHANPPTLLLPVAHMLEVGDPDDLAFLR.K	sp|Q13724|MOGS_HUMAN
U87MG_100ug_NHS_Rep1_5Frac_Frac-5_SII_8354_1_8354_3_1	2.29329	4.41421e-05	7.19513e-10	R.VVSSIEQK[UNIMOD:56]TEGAEK[UNIMOD:56]K[UNIMOD:56]QQMAR.E	sp|P63104|1433Z_HUMAN
U87MG_100ug_NHS_Rep1_5Frac_Frac-5_SII_9686_1_9686_3_1	2.29321	4.41421e-05	7.2001e-10	R.[UNIMOD:56]GGMK[UNIMOD:56]K[UNIMOD:56]K[UNIMOD:56]TTHFVEGGDAGNREDQINR.L	sp|P18124|RL7_HUMAN
U87MG_100ug_NHS_Rep1_5Frac_Frac-2_SII_14895_1_14895_3_1	2.29319	4.41421e-05	7.20138e-10	R.EENAEQQALAAK[UNIMOD:56]REDLEK[UNIMOD:56]K[UNIMOD:56]QQLLR.A	sp|Q9UQE7|SMC3_HUMAN
U87MG_100ug_NHS_Rep1_5Frac_Frac-4_SII_12458_1_12458_3_1	2.29311	4.41421e-05	7.20614e-10	R.FHVEEEGK[UNIMOD:56]GK[UNIMOD:56]DASGNK[UNIMOD:56]VK[UNIMOD:56]AEPAK[UNIMOD:56]IEAFR.A	sp|P00558|PGK1_HUMAN
U87MG_100ug_NHS_Rep1_5Frac_Frac-4_SII_13226_1_13226_2_1	2.29255	4.41421e-05	7.24053e-10	A.[UNIMOD:56]HSLLPVDDAINGLSEEQR.Q	sp|P26440|IVD_HUMAN
U87MG_100ug_NHS_Rep1_5Frac_Frac-3_SII_14654_1_14654_3_1	2.29198	4.41421e-05	7.27599e-10	S.[UNIMOD:27]EAGTAFIQTQQLHAAM[UNIMOD:35]ADTFLEHMC[UNIMOD:4]R.L	sp|P14618|KPYM_HUMAN
U87MG_100ug_NHS_Rep1_5Frac_Frac-3_SII_19299_1_19299_3_1	2.29095	4.41421e-05	7.3402e-10	R.K[UNIMOD:56]DGNASGTTLLEALDC[UNIMOD:4]ILPPTRPTDK[UNIMOD:56]PLR.L	sp|P68104|EF1A1_HUMAN
U87MG_100ug_NHS_Rep1_5Frac_Frac-1_SII_15346_1_15346_3_1	2.28943	4.41421e-05	7.43578e-10	R.[UNIMOD:56]SWHDIDK[UNIMOD:56]DNAK[UNIMOD:56]YVK[UNIMOD:56]K[UNIMOD:56]GTK[UNIMOD:56]HFEALANR.A	sp|Q15436|SC23A_HUMAN
U87MG_100ug_NHS_Rep1_5Frac_Frac-4_SII_8341_1_8341_2_1	2.28899	4.41421e-05	7.46391e-10	R.IK[UNIMOD:56]AIAAK[UNIMOD:56]HNK[UNIMOD:56]TTAQVLIR.F	sp|P15121|ALDR_HUMAN
U87MG_100ug_NHS_Rep1_5Frac_Frac-2_SII_10156_1_10156_3_1	2.28884	4.41421e-05	7.47348e-10	R.FQNVAK[UNIMOD:56]EGVK[UNIMOD:56]FDESEK[UNIMOD:56]TK[UNIMOD:56]ESR.E	sp|P14625|ENPL_HUMAN
U87MG_100ug_NHS_Rep1_5Frac_Frac-2_SII_6952_1_6952_3_1	2.28839	4.41421e-05	7.50162e-10	E.[UNIMOD:27]EK[UNIMOD:56]PIGAGEEK[UNIMOD:56]QK[UNIMOD:56]EGGK[UNIMOD:56]K[UNIMOD:56]K[UNIMOD:56]NK[UNIMOD:56]EGSGDGGR.A	sp|P26639|SYTC_HUMAN
U87MG_100ug_NHS_Rep1_5Frac_Frac-4_SII_16571_1_16571_3_1	2.28834	4.41421e-05	7.50523e-10	R.FHVEEEGK[UNIMOD:56]GK[UNIMOD:56]DASGNK[UNIMOD:56]VK[UNIMOD:56]AEPAK[UNIMOD:56]IEAFR.A	sp|P00558|PGK1_HUMAN
U87MG_100ug_NHS_Rep1_5Frac_Frac-4_SII_23178_1_23178_3_1	2.28824	4.41421e-05	7.51124e-10	-.[UNIMOD:1]DDDIAALVVDNGSGMC[UNIMOD:4]K[UNIMOD:56]AGFAGDDAPR.A	sp|P60709|ACTB_HUMAN
U87MG_100ug_NHS_Rep1_5Frac_Frac-3_SII_10598_1_10598_2_1	2.28807	4.41421e-05	7.52271e-10	R.[UNIMOD:27]EIQVQHPAAK[UNIMOD:56]SMIEISR.T	sp|P49368|TCPG_HUMAN
U87MG_100ug_NHS_Rep1_5Frac_Frac-4_SII_14586_1_14586_3_1	2.28785	4.41421e-05	7.53665e-10	R.FHVEEEGK[UNIMOD:56]GK[UNIMOD:56]DASGNK[UNIMOD:56]VK[UNIMOD:56]AEPAK[UNIMOD:56]IEAFR.A	sp|P00558|PGK1_HUMAN
U87MG_100ug_NHS_Rep1_5Frac_Frac-1_SII_15184_1_15184_2_1	2.28663	4.41421e-05	7.61515e-10	R.AEEYEFLTPVEEAPK[UNIMOD:56]GMLAR.G	sp|P52565|GDIR1_HUMAN
U87MG_100ug_NHS_Rep1_5Frac_Frac-4_SII_14366_1_14366_2_1	2.28662	4.41421e-05	7.61622e-10	-.[UNIMOD:1]DDDIAALVVDNGSGM[UNIMOD:35]C[UNIMOD:4]K[UNIMOD:56]AGFAGDDAPR.A	sp|P60709|ACTB_HUMAN
U87MG_100ug_NHS_Rep1_5Frac_Frac-3_SII_16513_1_16513_4_1	2.28652	4.41421e-05	7.62246e-10	-.[UNIMOD:1]SK[UNIMOD:56]PHSEAGTAFIQTQQLHAAMADTFLEHMC[UNIMOD:4]R.L	sp|P14618|KPYM_HUMAN
U87MG_100ug_NHS_Rep1_5Frac_Frac-2_SII_14706_1_14706_2_1	2.28621	4.41421e-05	7.64249e-10	R.[UNIMOD:28]QLFHPEQLITGK[UNIMOD:56]EDAANNYAR.G	sp|P68363|TBA1B_HUMAN
U87MG_100ug_NHS_Rep1_5Frac_Frac-3_SII_20021_1_20021_2_1	2.28601	4.41421e-05	7.65578e-10	R.[UNIMOD:56]SLHDALC[UNIMOD:4]VLAQTVK[UNIMOD:56]DSR.T	sp|P78371|TCPB_HUMAN
U87MG_100ug_NHS_Rep1_5Frac_Frac-4_SII_24126_1_24126_3_1	2.28555	4.41421e-05	7.68588e-10	-.[UNIMOD:1]EEEIAALVIDNGSGMC[UNIMOD:4]K[UNIMOD:56]AGFAGDDAPR.A	sp|P63261|ACTG_HUMAN
U87MG_100ug_NHS_Rep1_5Frac_Frac-4_SII_7491_1_7491_2_1	2.2855	4.41421e-05	7.68925e-10	R.HQGVMVGMGQK[UNIMOD:56]DSYVGDEAQSK[UNIMOD:56]R.G	sp|P60709|ACTB_HUMAN
U87MG_100ug_NHS_Rep1_5Frac_Frac-1_SII_2620_1_2620_3_1	2.28466	4.41421e-05	7.74426e-10	R.DTPAK[UNIMOD:56]NAQK[UNIMOD:56]SNQNGK[UNIMOD:56]DSK[UNIMOD:56]PSSTPR.S	sp|P06748|NPM_HUMAN
U87MG_100ug_NHS_Rep1_5Frac_Frac-4_SII_19451_1_19451_3_1	2.2845	4.41421e-05	7.7545e-10	R.[UNIMOD:56]STGEAFVQFASQEIAEK[UNIMOD:56]ALK[UNIMOD:56]K[UNIMOD:56]HK[UNIMOD:56]ER.I	sp|P55795|HNRH2_HUMAN
U87MG_100ug_NHS_Rep1_5Frac_Frac-5_SII_17984_1_17984_3_1	2.28417	4.41421e-05	7.77641e-10	R.[UNIMOD:28][UNIMOD:56]QK[UNIMOD:56]DVK[UNIMOD:56]DGK[UNIMOD:56]YSQVLANGLDNK[UNIMOD:56]LREDLER.L	sp|P62269|RS18_HUMAN
U87MG_100ug_NHS_Rep1_5Frac_Frac-3_SII_18918_1_18918_3_1	2.28328	4.41421e-05	7.83613e-10	R.K[UNIMOD:56]DGNASGTTLLEALDC[UNIMOD:4]ILPPTRPTDK[UNIMOD:56]PLR.L	sp|P68104|EF1A1_HUMAN
U87MG_100ug_NHS_Rep1_5Frac_Frac-4_SII_17445_1_17445_3_1	2.28218	4.41421e-05	7.90975e-10	R.FHVEEEGK[UNIMOD:56]GK[UNIMOD:56]DASGNK[UNIMOD:56]VK[UNIMOD:56]AEPAK[UNIMOD:56]IEAFR.A	sp|P00558|PGK1_HUMAN
U87MG_100ug_NHS_Rep1_5Frac_Frac-4_SII_3275_1_3275_2_1	2.28147	4.41421e-05	7.95797e-10	-.[UNIMOD:1]AATGANAEK[UNIMOD:56]AESHNDC[UNIMOD:4]PVR.L	sp|Q16831|UPP1_HUMAN
U87MG_100ug_NHS_Rep1_5Frac_Frac-2_SII_18396_1_18396_3_1	2.28143	4.41421e-05	7.96024e-10	R.[UNIMOD:28][UNIMOD:56]QK[UNIMOD:56]K[UNIMOD:56]ESEAVEWQQK[UNIMOD:56]AQMVQEDLEK[UNIMOD:56]TR.A	sp|P26038|MOES_HUMAN
U87MG_100ug_NHS_Rep1_5Frac_Frac-4_SII_19060_1_19060_2_1	2.28074	4.41421e-05	8.00724e-10	S.[UNIMOD:56]LHTDGDK[UNIMOD:56]AFVDFLSDEIK[UNIMOD:56]EER.K	sp|Q07021|C1QBP_HUMAN
U87MG_100ug_NHS_Rep1_5Frac_Frac-5_SII_8059_1_8059_3_1	2.28015	4.41421e-05	8.0474e-10	S.K[UNIMOD:56]SAPAPK[UNIMOD:56]K[UNIMOD:56]GSK[UNIMOD:56]K[UNIMOD:56]AVTK[UNIMOD:56]AQK[UNIMOD:56]K[UNIMOD:56]DGK[UNIMOD:56]K[UNIMOD:56]R.K	sp|P62807|H2B1C_HUMAN
U87MG_100ug_NHS_Rep1_5Frac_Frac-5_SII_19306_1_19306_2_1	2.27905	4.41421e-05	8.12343e-10	-.MVNPTVFFDIAVDGEPLGR.V	sp|P62937|PPIA_HUMAN
U87MG_100ug_NHS_Rep1_5Frac_Frac-4_SII_14689_1_14689_2_1	2.27792	4.41421e-05	8.20216e-10	R.[UNIMOD:56]K[UNIMOD:56]DLYANTVLSGGTTMYPGIADR.M	sp|P60709|ACTB_HUMAN
U87MG_100ug_NHS_Rep1_5Frac_Frac-1_SII_21595_1_21595_3_1	2.27716	4.41421e-05	8.25556e-10	R.ASREEILAQAK[UNIMOD:56]ENEK[UNIMOD:56]K[UNIMOD:56]LK[UNIMOD:56]SMEAEMIQLQEELAAAER.A	sp|P35579|MYH9_HUMAN
U87MG_100ug_NHS_Rep1_5Frac_Frac-1_SII_12344_1_12344_2_1	2.27691	4.41421e-05	8.27306e-10	R.PFPDGLAEDIDK[UNIMOD:56]GEVSAR.Q	sp|P13639|EF2_HUMAN
U87MG_100ug_NHS_Rep1_5Frac_Frac-1_SII_10745_1_10745_2_1	2.27515	4.41421e-05	8.39804e-10	-.[UNIMOD:1]MMC[UNIMOD:4]GAPSATQPATAETQHIADQVR.S	sp|P04080|CYTB_HUMAN
U87MG_100ug_NHS_Rep1_5Frac_Frac-5_SII_13493_1_13493_3_1	2.27466	4.41421e-05	8.43338e-10	R.[UNIMOD:56]SVHK[UNIMOD:56]VEPITK[UNIMOD:56]HIGLVYSGMGPDYR.V	sp|P25787|PSA2_HUMAN
U87MG_100ug_NHS_Rep1_5Frac_Frac-5_SII_13072_1_13072_3_1	2.27163	4.41421e-05	8.65411e-10	R.NALLSLAK[UNIMOD:56]GDRSEDFGVNEDLADSDAR.A	sp|P04083|ANXA1_HUMAN
U87MG_100ug_NHS_Rep1_5Frac_Frac-2_SII_9772_1_9772_3_1	2.27073	4.41421e-05	8.7204e-10	R.DEDDADYK[UNIMOD:56]PK[UNIMOD:56]K[UNIMOD:56]IK[UNIMOD:56]TEDTK[UNIMOD:56]K[UNIMOD:56]EK[UNIMOD:56]K[UNIMOD:56]R.K	sp|P11387|TOP1_HUMAN
U87MG_100ug_NHS_Rep1_5Frac_Frac-4_SII_7761_1_7761_3_1	2.2707	4.41421e-05	8.72296e-10	R.[UNIMOD:56]SHTSEGAHLDITPNSGAAGNSAGPK[UNIMOD:56]SMEVSC[UNIMOD:4].-	sp|Q92597|NDRG1_HUMAN
U87MG_100ug_NHS_Rep1_5Frac_Frac-5_SII_22990_1_22990_3_1	2.27041	4.41421e-05	8.74451e-10	-.[UNIMOD:56]VK[UNIMOD:56]LTAELIEQAAQYTNAVR.D	sp|P09661|RU2A_HUMAN
U87MG_100ug_NHS_Rep1_5Frac_Frac-3_SII_21661_1_21661_4_1	2.27001	4.41421e-05	8.77445e-10	R.TATQLAVNK[UNIMOD:56]IK[UNIMOD:56]EIAVTVK[UNIMOD:56]K[UNIMOD:56]ADK[UNIMOD:56]VEQR.K	sp|Q99832|TCPH_HUMAN
U87MG_100ug_NHS_Rep1_5Frac_Frac-5_SII_3759_1_3759_2_1	2.26949	4.41421e-05	8.81311e-10	R.K[UNIMOD:56]SLSDSESDDSK[UNIMOD:56]SK[UNIMOD:56]K[UNIMOD:56]K[UNIMOD:56]R.D	sp|Q13185|CBX3_HUMAN
U87MG_100ug_NHS_Rep1_5Frac_Frac-5_SII_21310_1_21310_4_1	2.2681	4.41421e-05	8.91803e-10	R.VLMEK[UNIMOD:56]EFPGFLENQK[UNIMOD:56]DPLAVDK[UNIMOD:56]IMK[UNIMOD:56]DLDQC[UNIMOD:4]R.D	sp|P60903|S10AA_HUMAN
U87MG_100ug_NHS_Rep1_5Frac_Frac-1_SII_19312_1_19312_3_1	2.26783	4.41421e-05	8.93865e-10	-.[UNIMOD:1]ATNFLAHEK[UNIMOD:56]IWFDK[UNIMOD:56]FK[UNIMOD:56]YDDAERR.F	sp|P29692|EF1D_HUMAN
U87MG_100ug_NHS_Rep1_5Frac_Frac-1_SII_11638_1_11638_2_1	2.26778	4.41421e-05	8.94273e-10	R.K[UNIMOD:56]K[UNIMOD:56]GAK[UNIMOD:56]LTPEEEEILNK[UNIMOD:56]K[UNIMOD:56]R.S	sp|P62241|RS8_HUMAN
U87MG_100ug_NHS_Rep1_5Frac_Frac-4_SII_14762_1_14762_2_1	2.26682	4.41421e-05	9.01594e-10	R.[UNIMOD:56]K[UNIMOD:56]DLYANTVLSGGTTMYPGIADR.M	sp|P60709|ACTB_HUMAN
U87MG_100ug_NHS_Rep1_5Frac_Frac-5_SII_14963_1_14963_3_1	2.26636	4.41421e-05	9.05134e-10	R.DDGLFSGDPNWFPK[UNIMOD:56]K[UNIMOD:56]SK[UNIMOD:56]ENPR.N	sp|P37802|TAGL2_HUMAN
U87MG_100ug_NHS_Rep1_5Frac_Frac-3_SII_17002_1_17002_3_1	2.26554	4.41421e-05	9.11507e-10	S.[UNIMOD:27]EAGTAFIQTQQLHAAMADTFLEHMC[UNIMOD:4]R.L	sp|P14618|KPYM_HUMAN
U87MG_100ug_NHS_Rep1_5Frac_Frac-4_SII_10200_1_10200_3_1	2.26553	4.41421e-05	9.11533e-10	-.[UNIMOD:1]SLK[UNIMOD:56]LQASNVTNK[UNIMOD:56]NDPK[UNIMOD:56]SINSR.V	sp|Q9UKM9|RALY_HUMAN
U87MG_100ug_NHS_Rep1_5Frac_Frac-5_SII_20946_1_20946_3_1	2.26492	4.41421e-05	9.16277e-10	-.[UNIMOD:1]C[UNIMOD:4]DFTEDQTAEFK[UNIMOD:56]EAFQLFDR.T	sp|P60660|MYL6_HUMAN
U87MG_100ug_NHS_Rep1_5Frac_Frac-5_SII_10426_1_10426_3_1	2.26474	4.41421e-05	9.17704e-10	-.[UNIMOD:1]SETAPAETATPAPVEK[UNIMOD:56]SPAK[UNIMOD:56]K[UNIMOD:56]K[UNIMOD:56]ATK[UNIMOD:56]K[UNIMOD:56]AAGAGAAK[UNIMOD:56]R.K	sp|P16401|H15_HUMAN
U87MG_100ug_NHS_Rep1_5Frac_Frac-3_SII_13614_1_13614_4_1	2.26467	4.41421e-05	9.18292e-10	-.[UNIMOD:1]SK[UNIMOD:56]PHSEAGTAFIQTQQLHAAM[UNIMOD:35]ADTFLEHMC[UNIMOD:4]R.L	sp|P14618|KPYM_HUMAN
U87MG_100ug_NHS_Rep1_5Frac_Frac-4_SII_12873_1_12873_3_1	2.2636	4.41421e-05	9.26648e-10	-.[UNIMOD:1]M[UNIMOD:35]EGVEEK[UNIMOD:56]K[UNIMOD:56]K[UNIMOD:56]EVPAVPETLK[UNIMOD:56]K[UNIMOD:56]K[UNIMOD:56]R.R	sp|P18124|RL7_HUMAN
U87MG_100ug_NHS_Rep1_5Frac_Frac-1_SII_16408_1_16408_2_1	2.26313	4.41421e-05	9.30374e-10	R.IIGLDQVAGMSETALPGAFK[UNIMOD:56]TR.K	sp|P35579|MYH9_HUMAN
U87MG_100ug_NHS_Rep1_5Frac_Frac-1_SII_9996_1_9996_3_1	2.26289	4.41421e-05	9.32265e-10	-.[UNIMOD:56]PEPTK[UNIMOD:56]SAPAPK[UNIMOD:56]K[UNIMOD:56]GSK[UNIMOD:56]K[UNIMOD:56]AVTK[UNIMOD:56]AQK[UNIMOD:56]K[UNIMOD:56]DGK[UNIMOD:56]K[UNIMOD:56]R.K	sp|P58876|H2B1D_HUMAN
U87MG_100ug_NHS_Rep1_5Frac_Frac-3_SII_15868_1_15868_3_1	2.26192	4.41421e-05	9.40028e-10	R.NNGVVDK[UNIMOD:56]SLFSNVVTK[UNIMOD:56]NK[UNIMOD:56]DLPESALR.D	sp|P31939|PUR9_HUMAN
U87MG_100ug_NHS_Rep1_5Frac_Frac-1_SII_17331_1_17331_3_1	2.26169	4.41421e-05	9.4192e-10	S.[UNIMOD:27][UNIMOD:56]EAGTAFIQTQQLHAAMADTFLEHMC[UNIMOD:4]R.L	sp|P14618|KPYM_HUMAN
U87MG_100ug_NHS_Rep1_5Frac_Frac-1_SII_17527_1_17527_3_1	2.26155	4.41421e-05	9.42997e-10	Q.[UNIMOD:27]EVNILK[UNIMOD:56]K[UNIMOD:56]TLEEEAK[UNIMOD:56]THEAQIQEM[UNIMOD:35]R.Q	sp|P35579|MYH9_HUMAN
U87MG_100ug_NHS_Rep1_5Frac_Frac-4_SII_3248_1_3248_2_1	2.26093	4.41421e-05	9.48026e-10	-.[UNIMOD:1]AATGANAEK[UNIMOD:56]AESHNDC[UNIMOD:4]PVR.L	sp|Q16831|UPP1_HUMAN
U87MG_100ug_NHS_Rep1_5Frac_Frac-5_SII_2370_1_2370_2_1	2.26075	4.41421e-05	9.49465e-10	R.K[UNIMOD:56]HK[UNIMOD:56]K[UNIMOD:56]GQSEEIQK[UNIMOD:56]K[UNIMOD:56]R.T	sp|P83731|RL24_HUMAN
U87MG_100ug_NHS_Rep1_5Frac_Frac-2_SII_18286_1_18286_3_1	2.25978	4.41421e-05	9.57353e-10	R.[UNIMOD:28][UNIMOD:56]QK[UNIMOD:56]LSLSTK[UNIMOD:56]LK[UNIMOD:56]QVEDEK[UNIMOD:56]NSFR.E	sp|P35579|MYH9_HUMAN
U87MG_100ug_NHS_Rep1_5Frac_Frac-4_SII_20990_1_20990_3_1	2.25951	4.41421e-05	9.59535e-10	R.GALQNIIPASTGAAK[UNIMOD:56]AVGK[UNIMOD:56]VIPELNGK[UNIMOD:56]LTGM[UNIMOD:35]AFR.V	sp|P04406|G3P_HUMAN
U87MG_100ug_NHS_Rep1_5Frac_Frac-3_SII_18221_1_18221_2_1	2.25941	4.41421e-05	9.60331e-10	R.VQDDEVGDGTTSVTVLAAELLR.E	sp|P78371|TCPB_HUMAN
U87MG_100ug_NHS_Rep1_5Frac_Frac-2_SII_21384_1_21384_3_1	2.25886	4.41421e-05	9.64893e-10	-.[UNIMOD:1]AALDSLSLFTSLGLSEQK[UNIMOD:56]AR.E	sp|P47897|SYQ_HUMAN
U87MG_100ug_NHS_Rep1_5Frac_Frac-1_SII_13963_1_13963_4_1	2.25877	4.41421e-05	9.65607e-10	-.[UNIMOD:1]SK[UNIMOD:56]PHSEAGTAFIQTQQLHAAMADTFLEHM[UNIMOD:35]C[UNIMOD:4]R.L	sp|P14618|KPYM_HUMAN
U87MG_100ug_NHS_Rep1_5Frac_Frac-5_SII_21452_1_21452_3_1	2.25815	4.41421e-05	9.70751e-10	-.[UNIMOD:1]ASGVAVSDGVIK[UNIMOD:56]VFNDMK[UNIMOD:56]VR.K	sp|P23528|COF1_HUMAN
U87MG_100ug_NHS_Rep1_5Frac_Frac-1_SII_14505_1_14505_2_1	2.25811	4.41421e-05	9.71072e-10	R.K[UNIMOD:56]K[UNIMOD:56]VEAQLQELQVK[UNIMOD:56]FNEGER.V	sp|P35579|MYH9_HUMAN
U87MG_100ug_NHS_Rep1_5Frac_Frac-5_SII_13805_1_13805_3_1	2.25719	4.41421e-05	9.78671e-10	D.[UNIMOD:27]EHSVNYK[UNIMOD:56]PPAQK[UNIMOD:56]SIQEIQELDK[UNIMOD:56]DDESLR.K	sp|P52565|GDIR1_HUMAN
U87MG_100ug_NHS_Rep1_5Frac_Frac-4_SII_18362_1_18362_4_1	2.25657	4.41421e-05	9.83913e-10	R.[UNIMOD:56]GFGFVTFDDHDPVDK[UNIMOD:56]IVLQK[UNIMOD:56]YHTINGHNAEVR.K	sp|P22626|ROA2_HUMAN
U87MG_100ug_NHS_Rep1_5Frac_Frac-4_SII_23209_1_23209_2_1	2.2562	4.41421e-05	9.86987e-10	-.[UNIMOD:1]DDDIAALVVDNGSGMC[UNIMOD:4]K[UNIMOD:56]AGFAGDDAPR.A	sp|P60709|ACTB_HUMAN
U87MG_100ug_NHS_Rep1_5Frac_Frac-3_SII_17031_1_17031_2_1	2.25611	4.41421e-05	9.87731e-10	R.IDNDGDGFVTTEELK[UNIMOD:56]TWIK[UNIMOD:56]R.V	sp|Q15293|RCN1_HUMAN
U87MG_100ug_NHS_Rep1_5Frac_Frac-3_SII_10120_1_10120_2_1	2.25585	4.41421e-05	9.89951e-10	R.LAK[UNIMOD:56]VDATEESDLAQQYGVR.G	sp|P07237|PDIA1_HUMAN
U87MG_100ug_NHS_Rep1_5Frac_Frac-3_SII_11433_1_11433_2_1	2.25466	4.41421e-05	1.00008e-09	R.EMEENFAVEAANYQDTIGR.L	sp|P08670|VIME_HUMAN
U87MG_100ug_NHS_Rep1_5Frac_Frac-3_SII_21667_1_21667_4_1	2.25407	4.41421e-05	1.00508e-09	-.[UNIMOD:1]ALHVPK[UNIMOD:56]APGFAQMLK[UNIMOD:56]EGAK[UNIMOD:56]HFSGLEEAVYR.N	sp|P50990|TCPQ_HUMAN
U87MG_100ug_NHS_Rep1_5Frac_Frac-1_SII_15518_1_15518_3_1	2.2536	4.41421e-05	1.00909e-09	K.[UNIMOD:27]EK[UNIMOD:56]ISK[UNIMOD:56]LEEK[UNIMOD:56]K[UNIMOD:56]DK[UNIMOD:56]EK[UNIMOD:56]K[UNIMOD:56]EIK[UNIMOD:56]K[UNIMOD:56]ER.K	sp|P78559|MAP1A_HUMAN
U87MG_100ug_NHS_Rep1_5Frac_Frac-1_SII_11332_1_11332_3_1	2.25347	4.41421e-05	1.01021e-09	R.K[UNIMOD:56]GEITGEVHMPSGK[UNIMOD:56]TATPEIVDNK[UNIMOD:56]DGTVTVR.Y	sp|O75369|FLNB_HUMAN
U87MG_100ug_NHS_Rep1_5Frac_Frac-3_SII_11916_1_11916_2_1	2.25242	4.41421e-05	1.01934e-09	R.IDINMSGFNETDDLK[UNIMOD:56]R.A	sp|P13797|PLST_HUMAN
U87MG_100ug_NHS_Rep1_5Frac_Frac-5_SII_2319_1_2319_2_1	2.25173	4.41421e-05	1.02532e-09	R.K[UNIMOD:56]HK[UNIMOD:56]K[UNIMOD:56]GQSEEIQK[UNIMOD:56]K[UNIMOD:56]R.T	sp|P83731|RL24_HUMAN
U87MG_100ug_NHS_Rep1_5Frac_Frac-5_SII_13965_1_13965_3_1	2.25167	4.41421e-05	1.02589e-09	N.[UNIMOD:27]EEDEHSVNYK[UNIMOD:56]PPAQK[UNIMOD:56]SIQEIQELDK[UNIMOD:56]DDESLR.K	sp|P52565|GDIR1_HUMAN
U87MG_100ug_NHS_Rep1_5Frac_Frac-1_SII_12527_1_12527_3_1	2.25156	4.41421e-05	1.02683e-09	R.QDLADVVQVC[UNIMOD:4]EGK[UNIMOD:56]K[UNIMOD:56]K[UNIMOD:56]QTNYLR.T	sp|Q14204|DYHC1_HUMAN
U87MG_100ug_NHS_Rep1_5Frac_Frac-5_SII_22048_1_22048_3_1	2.25125	4.41421e-05	1.02954e-09	-.[UNIMOD:1]ASGVAVSDGVIK[UNIMOD:56]VFNDMK[UNIMOD:56]VR.K	sp|P23528|COF1_HUMAN
U87MG_100ug_NHS_Rep1_5Frac_Frac-4_SII_20104_1_20104_3_1	2.251	4.41421e-05	1.03174e-09	R.FHVEEEGK[UNIMOD:56]GK[UNIMOD:56]DASGNK[UNIMOD:56]VK[UNIMOD:56]AEPAK[UNIMOD:56]IEAFR.A	sp|P00558|PGK1_HUMAN
U87MG_100ug_NHS_Rep1_5Frac_Frac-1_SII_10802_1_10802_2_1	2.25045	4.41421e-05	1.03661e-09	R.[UNIMOD:1]MFSVAHPAAK[UNIMOD:56]VPQPER.L	sp|Q6ZS17|RIPR1_HUMAN
U87MG_100ug_NHS_Rep1_5Frac_Frac-4_SII_8528_1_8528_3_1	2.25026	4.41421e-05	1.03827e-09	R.THMQDLK[UNIMOD:56]DVTNNVHYENYR.S	sp|Q16181|SEPT7_HUMAN
U87MG_100ug_NHS_Rep1_5Frac_Frac-5_SII_11020_1_11020_3_1	2.2493	4.41421e-05	1.04679e-09	R.AK[UNIMOD:56]C[UNIMOD:4]FEK[UNIMOD:56]NEAIQAAHDAVAQEGQC[UNIMOD:4]R.V	sp|P09936|UCHL1_HUMAN
U87MG_100ug_NHS_Rep1_5Frac_Frac-4_SII_19736_1_19736_3_1	2.24656	4.41421e-05	1.07151e-09	R.[UNIMOD:56]GFGFVTYATVEEVDAAMNARPHK[UNIMOD:56]VDGR.V	sp|P09651|ROA1_HUMAN
U87MG_100ug_NHS_Rep1_5Frac_Frac-1_SII_18431_1_18431_3_1	2.24542	4.41421e-05	1.08198e-09	R.[UNIMOD:28][UNIMOD:56]QK[UNIMOD:56]LSLSTK[UNIMOD:56]LK[UNIMOD:56]QVEDEK[UNIMOD:56]NSFR.E	sp|P35579|MYH9_HUMAN
U87MG_100ug_NHS_Rep1_5Frac_Frac-1_SII_10406_1_10406_2_1	2.24515	4.41421e-05	1.08445e-09	R.LGIEK[UNIMOD:56]TDPTTLTDEEINR.F	sp|P11586|C1TC_HUMAN
U87MG_100ug_NHS_Rep1_5Frac_Frac-3_SII_22371_1_22371_3_1	2.24502	4.41421e-05	1.08568e-09	R.[UNIMOD:56]GLK[UNIMOD:56]MSATFIGNSTAIQELFK[UNIMOD:56]R.I	sp|P68371|TBB4B_HUMAN
U87MG_100ug_NHS_Rep1_5Frac_Frac-4_SII_10358_1_10358_2_1	2.24431	4.41421e-05	1.09223e-09	R.AHQVVEDGYEFFAK[UNIMOD:56]R.Q	sp|P62140|PP1B_HUMAN
U87MG_100ug_NHS_Rep1_5Frac_Frac-2_SII_17891_1_17891_3_1	2.24353	4.41421e-05	1.09953e-09	R.[UNIMOD:56]SIGAAAK[UNIMOD:56]SQVISNAK[UNIMOD:56]NTVQGFK[UNIMOD:56]R.F	sp|P34932|HSP74_HUMAN
U87MG_100ug_NHS_Rep1_5Frac_Frac-4_SII_11940_1_11940_3_1	2.24347	4.41421e-05	1.10007e-09	R.FHVEEEGK[UNIMOD:56]GK[UNIMOD:56]DASGNK[UNIMOD:56]VK[UNIMOD:56]AEPAK[UNIMOD:56]IEAFR.A	sp|P00558|PGK1_HUMAN
U87MG_100ug_NHS_Rep1_5Frac_Frac-5_SII_19924_1_19924_3_1	2.24288	4.41421e-05	1.10566e-09	-.[UNIMOD:1]ASGVAVSDGVIK[UNIMOD:56]VFNDMK[UNIMOD:56]VR.K	sp|P23528|COF1_HUMAN
U87MG_100ug_NHS_Rep1_5Frac_Frac-5_SII_7461_1_7461_2_1	2.24272	4.41421e-05	1.10714e-09	R.EK[UNIMOD:56]IVAPISDSPK[UNIMOD:56]PPPQR.V	sp|O95336|6PGL_HUMAN
U87MG_100ug_NHS_Rep1_5Frac_Frac-1_SII_14327_1_14327_3_1	2.24202	4.41421e-05	1.11382e-09	R.YASIC[UNIMOD:4]QQNGIVPIVEPEILPDGDHDLK[UNIMOD:56]R.C	sp|P09972|ALDOC_HUMAN
U87MG_100ug_NHS_Rep1_5Frac_Frac-2_SII_20286_1_20286_3_1	2.24196	4.41421e-05	1.11432e-09	R.[UNIMOD:56]VK[UNIMOD:56]EVVK[UNIMOD:56]K[UNIMOD:56]HSQFIGYPITLYLEK[UNIMOD:56]ER.E	sp|P08238|HS90B_HUMAN
U87MG_100ug_NHS_Rep1_5Frac_Frac-1_SII_12318_1_12318_2_1	2.24123	4.41421e-05	1.12132e-09	R.PFPDGLAEDIDK[UNIMOD:56]GEVSAR.Q	sp|P13639|EF2_HUMAN
U87MG_100ug_NHS_Rep1_5Frac_Frac-3_SII_21764_1_21764_3_1	2.24098	4.41421e-05	1.12365e-09	R.[UNIMOD:56]GLK[UNIMOD:56]MSATFIGNSTAIQELFK[UNIMOD:56]R.I	sp|P68371|TBB4B_HUMAN
U87MG_100ug_NHS_Rep1_5Frac_Frac-1_SII_14446_1_14446_3_1	2.24087	4.41421e-05	1.12476e-09	R.[UNIMOD:28]QAQQERDELADEIANSSGK[UNIMOD:56]GALALEEK[UNIMOD:56]R.R	sp|P35579|MYH9_HUMAN
U87MG_100ug_NHS_Rep1_5Frac_Frac-4_SII_2309_1_2309_3_1	2.24	4.41421e-05	1.13309e-09	R.DTPAK[UNIMOD:56]NAQK[UNIMOD:56]SNQNGK[UNIMOD:56]DSK[UNIMOD:56]PSSTPR.S	sp|P06748|NPM_HUMAN
U87MG_100ug_NHS_Rep1_5Frac_Frac-1_SII_5108_1_5108_2_1	2.2396	4.41421e-05	1.13703e-09	R.[UNIMOD:28][UNIMOD:56]QLAEAHAQAK[UNIMOD:56]AQAER.E	sp|Q15149|PLEC_HUMAN
U87MG_100ug_NHS_Rep1_5Frac_Frac-3_SII_13179_1_13179_3_1	2.23906	4.41421e-05	1.14224e-09	R.NALLSLAK[UNIMOD:56]GDRSEDFGVNEDLADSDAR.A	sp|P04083|ANXA1_HUMAN
U87MG_100ug_NHS_Rep1_5Frac_Frac-5_SII_12403_1_12403_3_1	2.23847	4.41421e-05	1.14797e-09	R.K[UNIMOD:56]QMVIDVLHPGK[UNIMOD:56]ATVPK[UNIMOD:56]TEIR.E	sp|P62847|RS24_HUMAN
U87MG_100ug_NHS_Rep1_5Frac_Frac-3_SII_1633_1_1633_3_1	2.23803	4.41421e-05	1.15228e-09	R.EDGNEEDK[UNIMOD:56]ENQGDETQGQQPPQRR.Y	sp|P67809|YBOX1_HUMAN
U87MG_100ug_NHS_Rep1_5Frac_Frac-1_SII_13312_1_13312_3_1	2.23794	4.41421e-05	1.15319e-09	R.TEM[UNIMOD:35]EDLMSSK[UNIMOD:56]DDVGK[UNIMOD:56]SVHELEK[UNIMOD:56]SK[UNIMOD:56]R.A	sp|P35579|MYH9_HUMAN
U87MG_100ug_NHS_Rep1_5Frac_Frac-4_SII_9530_1_9530_2_1	2.23751	4.41421e-05	1.15743e-09	R.FGEVVDC[UNIMOD:4]TIK[UNIMOD:56]TDPVTGR.S	sp|O14979|HNRDL_HUMAN
U87MG_100ug_NHS_Rep1_5Frac_Frac-5_SII_11591_1_11591_2_1	2.23745	4.41421e-05	1.15799e-09	R.DK[UNIMOD:56]VVGK[UNIMOD:56]DYLLC[UNIMOD:4]DYNR.D	sp|P47756|CAPZB_HUMAN
U87MG_100ug_NHS_Rep1_5Frac_Frac-1_SII_14886_1_14886_3_1	2.23712	4.41421e-05	1.16127e-09	R.[UNIMOD:28][UNIMOD:56]QK[UNIMOD:56]ASIHEAWTDGK[UNIMOD:56]EAMLK[UNIMOD:56]HR.D	sp|O43707|ACTN4_HUMAN
U87MG_100ug_NHS_Rep1_5Frac_Frac-5_SII_11791_1_11791_3_1	2.23701	4.41421e-05	1.16233e-09	R.EK[UNIMOD:56]LQEEMLQREEAENTLQSFR.Q	sp|P08670|VIME_HUMAN
U87MG_100ug_NHS_Rep1_5Frac_Frac-4_SII_18460_1_18460_4_1	2.23655	4.41421e-05	1.16696e-09	R.[UNIMOD:56]ALQASALK[UNIMOD:56]AWGGK[UNIMOD:56]K[UNIMOD:56]ENLK[UNIMOD:56]AAQEEYVK[UNIMOD:56]R.A	sp|P04075|ALDOA_HUMAN
U87MG_100ug_NHS_Rep1_5Frac_Frac-4_SII_22853_1_22853_3_1	2.23466	4.41421e-05	1.18592e-09	R.[UNIMOD:56]GLK[UNIMOD:56]MAVTFIGNSTAIQELFK[UNIMOD:56]R.I	sp|P07437|TBB5_HUMAN
U87MG_100ug_NHS_Rep1_5Frac_Frac-3_SII_20023_1_20023_4_1	2.23445	4.41421e-05	1.18798e-09	R.VK[UNIMOD:56]EK[UNIMOD:56]EAELK[UNIMOD:56]EAEK[UNIMOD:56]ELHEK[UNIMOD:56]FDLLK[UNIMOD:56]R.T	sp|Q9NVA2|SEP11_HUMAN
U87MG_100ug_NHS_Rep1_5Frac_Frac-2_SII_10972_1_10972_3_1	2.23347	4.41421e-05	1.19796e-09	-.[UNIMOD:56]PDPAK[UNIMOD:56]SAPAPK[UNIMOD:56]K[UNIMOD:56]GSK[UNIMOD:56]K[UNIMOD:56]AVTK[UNIMOD:56]VQK[UNIMOD:56]K[UNIMOD:56]DGK[UNIMOD:56]K[UNIMOD:56]R.K	sp|Q5QNW6|H2B2F_HUMAN
U87MG_100ug_NHS_Rep1_5Frac_Frac-5_SII_9241_1_9241_3_1	2.23293	4.41421e-05	1.20347e-09	L.[UNIMOD:56]AK[UNIMOD:56]SAPAPK[UNIMOD:56]K[UNIMOD:56]GSK[UNIMOD:56]K[UNIMOD:56]AVTK[UNIMOD:56]AQK[UNIMOD:56]K[UNIMOD:56]DGK[UNIMOD:56]K[UNIMOD:56]R.K	sp|P62807|H2B1C_HUMAN
U87MG_100ug_NHS_Rep1_5Frac_Frac-5_SII_17394_1_17394_3_1	2.23292	4.41421e-05	1.20356e-09	-.[UNIMOD:1]SDAAVDTSSEITTK[UNIMOD:56]DLK[UNIMOD:56]EK[UNIMOD:56]K[UNIMOD:56]EVVEEAENGR.D	sp|P06454|PTMA_HUMAN
U87MG_100ug_NHS_Rep1_5Frac_Frac-1_SII_19161_1_19161_3_1	2.23184	4.41421e-05	1.2147e-09	R.K[UNIMOD:56]DGNASGTTLLEALDC[UNIMOD:4]ILPPTRPTDK[UNIMOD:56]PLR.L	sp|P68104|EF1A1_HUMAN
U87MG_100ug_NHS_Rep1_5Frac_Frac-2_SII_14737_1_14737_3_1	2.23035	4.41421e-05	1.23024e-09	R.[UNIMOD:56]YESLTDPSK[UNIMOD:56]LDSGK[UNIMOD:56]ELHINLIPNK[UNIMOD:56]QDR.T	sp|P07900|HS90A_HUMAN
U87MG_100ug_NHS_Rep1_5Frac_Frac-3_SII_11638_1_11638_2_1	2.22863	4.41421e-05	1.24838e-09	R.EMEENFAVEAANYQDTIGR.L	sp|P08670|VIME_HUMAN
U87MG_100ug_NHS_Rep1_5Frac_Frac-2_SII_7920_1_7920_2_1	2.22797	4.41421e-05	1.25544e-09	R.LEGLGSSEADQDGLASTVR.S	sp|Q07065|CKAP4_HUMAN
U87MG_100ug_NHS_Rep1_5Frac_Frac-2_SII_13810_1_13810_4_1	2.22788	4.41421e-05	1.25647e-09	-.[UNIMOD:1]SK[UNIMOD:56]PHSEAGTAFIQTQQLHAAMADTFLEHM[UNIMOD:35]C[UNIMOD:4]R.L	sp|P14618|KPYM_HUMAN
U87MG_100ug_NHS_Rep1_5Frac_Frac-5_SII_12951_1_12951_3_1	2.22737	4.41421e-05	1.26192e-09	-.[UNIMOD:1]M[UNIMOD:35]EGVEEK[UNIMOD:56]K[UNIMOD:56]K[UNIMOD:56]EVPAVPETLK[UNIMOD:56]K[UNIMOD:56]K[UNIMOD:56]R.R	sp|P18124|RL7_HUMAN
U87MG_100ug_NHS_Rep1_5Frac_Frac-5_SII_17350_1_17350_2_1	2.22731	4.41421e-05	1.26254e-09	-.[UNIMOD:1]ASGVAVSDGVIK[UNIMOD:56]VFNDMK[UNIMOD:56]VR.K	sp|P23528|COF1_HUMAN
U87MG_100ug_NHS_Rep1_5Frac_Frac-2_SII_17141_1_17141_3_1	2.22729	4.41421e-05	1.26276e-09	R.EQEVNILK[UNIMOD:56]K[UNIMOD:56]TLEEEAK[UNIMOD:56]THEAQIQEMR.Q	sp|P35579|MYH9_HUMAN
U87MG_100ug_NHS_Rep1_5Frac_Frac-5_SII_18345_1_18345_2_1	2.22677	4.41421e-05	1.26834e-09	R.NDFQLIGIQDGYLSLLQDSGEVR.E	sp|P63241|IF5A1_HUMAN
U87MG_100ug_NHS_Rep1_5Frac_Frac-2_SII_8827_1_8827_2_1	2.22628	4.41421e-05	1.27371e-09	R.YHTSQSGDEMTSLSEYVSR.M	sp|P08238|HS90B_HUMAN
U87MG_100ug_NHS_Rep1_5Frac_Frac-4_SII_6862_1_6862_3_1	2.22586	4.41421e-05	1.2782e-09	R.HQGVMVGMGQK[UNIMOD:56]DSYVGDEAQSK[UNIMOD:56]R.G	sp|P60709|ACTB_HUMAN
U87MG_100ug_NHS_Rep1_5Frac_Frac-5_SII_11379_1_11379_2_1	2.22538	4.41421e-05	1.28347e-09	R.EMEENFAVEAANYQDTIGR.L	sp|P08670|VIME_HUMAN
U87MG_100ug_NHS_Rep1_5Frac_Frac-4_SII_5901_1_5901_2_1	2.22441	4.41421e-05	1.29415e-09	R.[UNIMOD:56]HAHGDQYK[UNIMOD:56]ATDFVADR.A	sp|P48735|IDHP_HUMAN
U87MG_100ug_NHS_Rep1_5Frac_Frac-4_SII_14447_1_14447_3_1	2.22414	4.41421e-05	1.29717e-09	-.[UNIMOD:1]SLSNK[UNIMOD:56]LTLDK[UNIMOD:56]LDVK[UNIMOD:56]GK[UNIMOD:56]R.V	sp|P00558|PGK1_HUMAN
U87MG_100ug_NHS_Rep1_5Frac_Frac-3_SII_18315_1_18315_3_1	2.22368	4.41421e-05	1.30221e-09	R.[UNIMOD:56]SVTLLIK[UNIMOD:56]GPNK[UNIMOD:56]HTLTQIK[UNIMOD:56]DAVR.D	sp|P40227|TCPZ_HUMAN
U87MG_100ug_NHS_Rep1_5Frac_Frac-5_SII_11124_1_11124_3_1	2.22292	4.41421e-05	1.3107e-09	R.NHIQLVK[UNIMOD:56]LQVEEVHQLSR.K	sp|Q9NR28|DBLOH_HUMAN
U87MG_100ug_NHS_Rep1_5Frac_Frac-1_SII_13490_1_13490_3_1	2.22263	4.41421e-05	1.31389e-09	R.[UNIMOD:28]QTATQLLK[UNIMOD:56]LAHK[UNIMOD:56]YRPETK[UNIMOD:56]QEK[UNIMOD:56]K[UNIMOD:56]QR.L	sp|P62424|RL7A_HUMAN
U87MG_100ug_NHS_Rep1_5Frac_Frac-5_SII_18494_1_18494_3_1	2.22199	4.41421e-05	1.32108e-09	-.[UNIMOD:56]MK[UNIMOD:56]TILSNQTVDIPENVDITLK[UNIMOD:56]GR.T	sp|P32969|RL9_HUMAN
U87MG_100ug_NHS_Rep1_5Frac_Frac-3_SII_21586_1_21586_3_1	2.22189	4.41421e-05	1.32226e-09	R.TATQLAVNK[UNIMOD:56]IK[UNIMOD:56]EIAVTVK[UNIMOD:56]K[UNIMOD:56]ADK[UNIMOD:56]VEQR.K	sp|Q99832|TCPH_HUMAN
U87MG_100ug_NHS_Rep1_5Frac_Frac-4_SII_12251_1_12251_3_1	2.22157	4.41421e-05	1.32588e-09	R.FHVEEEGK[UNIMOD:56]GK[UNIMOD:56]DASGNK[UNIMOD:56]VK[UNIMOD:56]AEPAK[UNIMOD:56]IEAFR.A	sp|P00558|PGK1_HUMAN
U87MG_100ug_NHS_Rep1_5Frac_Frac-4_SII_16542_1_16542_3_1	2.22033	4.41421e-05	1.33996e-09	R.FHVEEEGK[UNIMOD:56]GK[UNIMOD:56]DASGNK[UNIMOD:56]VK[UNIMOD:56]AEPAK[UNIMOD:56]IEAFR.A	sp|P00558|PGK1_HUMAN
U87MG_100ug_NHS_Rep1_5Frac_Frac-1_SII_7205_1_7205_3_1	2.22027	4.41421e-05	1.34067e-09	R.MPSGK[UNIMOD:56]TARPNITDNK[UNIMOD:56]DGTITVR.Y	sp|Q14315|FLNC_HUMAN
U87MG_100ug_NHS_Rep1_5Frac_Frac-2_SII_9246_1_9246_2_1	2.22009	4.41421e-05	1.34265e-09	R.[UNIMOD:56]YHTSQSGDEMTSLSEYVSR.M	sp|P08238|HS90B_HUMAN
U87MG_100ug_NHS_Rep1_5Frac_Frac-4_SII_16665_1_16665_2_1	2.21994	4.41421e-05	1.34443e-09	-.[UNIMOD:1]DDDIAALVVDNGSGMC[UNIMOD:4]K[UNIMOD:56]AGFAGDDAPR.A	sp|P60709|ACTB_HUMAN
U87MG_100ug_NHS_Rep1_5Frac_Frac-1_SII_10375_1_10375_3_1	2.21987	4.41421e-05	1.34523e-09	R.VELK[UNIMOD:56]GTVRPANDFNPDADAK[UNIMOD:56]ALR.K	sp|P08133|ANXA6_HUMAN
U87MG_100ug_NHS_Rep1_5Frac_Frac-1_SII_18601_1_18601_3_1	2.21878	4.41421e-05	1.35778e-09	R.VEPLRNELQK[UNIMOD:56]LEDDAK[UNIMOD:56]DNQQK[UNIMOD:56]ANEVEQMIR.D	sp|Q14204|DYHC1_HUMAN
U87MG_100ug_NHS_Rep1_5Frac_Frac-5_SII_11466_1_11466_4_1	2.21868	4.41421e-05	1.35895e-09	-.[UNIMOD:1]PPK[UNIMOD:56]DDK[UNIMOD:56]K[UNIMOD:56]K[UNIMOD:56]K[UNIMOD:56]DAGK[UNIMOD:56]SAK[UNIMOD:56]K[UNIMOD:56]DK[UNIMOD:56]DPVNK[UNIMOD:56]SGGK[UNIMOD:56]AK[UNIMOD:56]K[UNIMOD:56]K[UNIMOD:56]K[UNIMOD:56]WSK[UNIMOD:56]GK[UNIMOD:56]VR.D	sp|P62851|RS25_HUMAN
U87MG_100ug_NHS_Rep1_5Frac_Frac-4_SII_14676_1_14676_2_1	2.21823	4.41421e-05	1.36415e-09	R.[UNIMOD:28]QLFHPEQLITGK[UNIMOD:56]EDAANNYAR.G	sp|P68363|TBA1B_HUMAN
U87MG_100ug_NHS_Rep1_5Frac_Frac-4_SII_8862_1_8862_4_1	2.21822	4.41421e-05	1.36423e-09	R.[UNIMOD:56]HQGVMVGMGQK[UNIMOD:56]DSYVGDEAQSK[UNIMOD:56]R.G	sp|P60709|ACTB_HUMAN
U87MG_100ug_NHS_Rep1_5Frac_Frac-3_SII_1809_1_1809_2_1	2.21801	4.41421e-05	1.36665e-09	R.K[UNIMOD:56]HEAK[UNIMOD:56]K[UNIMOD:56]AAK[UNIMOD:56]QEAR.S	sp|Q9BY44|EIF2A_HUMAN
U87MG_100ug_NHS_Rep1_5Frac_Frac-5_SII_8174_1_8174_3_1	2.21777	4.41421e-05	1.36954e-09	E.LAK[UNIMOD:56]SAPAPK[UNIMOD:56]K[UNIMOD:56]GSK[UNIMOD:56]K[UNIMOD:56]AVTK[UNIMOD:56]AQK[UNIMOD:56]K[UNIMOD:56]DGK[UNIMOD:56]K[UNIMOD:56]R.K	sp|Q99880|H2B1L_HUMAN
U87MG_100ug_NHS_Rep1_5Frac_Frac-5_SII_18302_1_18302_4_1	2.21749	4.41421e-05	1.37279e-09	-.[UNIMOD:1]ASNK[UNIMOD:56]TTLQK[UNIMOD:56]MGK[UNIMOD:56]K[UNIMOD:56]QNGK[UNIMOD:56]SK[UNIMOD:56]K[UNIMOD:56]VEEAEPEEFVVEK[UNIMOD:56]VLDRR.V	sp|Q13185|CBX3_HUMAN
U87MG_100ug_NHS_Rep1_5Frac_Frac-4_SII_19498_1_19498_3_1	2.21746	4.41421e-05	1.37315e-09	R.[UNIMOD:56]K[UNIMOD:56]DGNASGTTLLEALDC[UNIMOD:4]ILPPTRPTDK[UNIMOD:56]PLR.L	sp|P68104|EF1A1_HUMAN
U87MG_100ug_NHS_Rep1_5Frac_Frac-3_SII_22389_1_22389_3_1	2.21711	4.41421e-05	1.37723e-09	R.DASLMVTNDGATILK[UNIMOD:56]NIGVDNPAAK[UNIMOD:56]VLVDMSR.V	sp|P78371|TCPB_HUMAN
U87MG_100ug_NHS_Rep1_5Frac_Frac-5_SII_22091_1_22091_3_1	2.21595	4.41421e-05	1.39095e-09	-.[UNIMOD:1]ASGVAVSDGVIK[UNIMOD:56]VFNDMK[UNIMOD:56]VR.K	sp|P23528|COF1_HUMAN
U87MG_100ug_NHS_Rep1_5Frac_Frac-4_SII_13053_1_13053_3_1	2.21579	4.41421e-05	1.39284e-09	R.FHVEEEGK[UNIMOD:56]GK[UNIMOD:56]DASGNK[UNIMOD:56]VK[UNIMOD:56]AEPAK[UNIMOD:56]IEAFR.A	sp|P00558|PGK1_HUMAN
U87MG_100ug_NHS_Rep1_5Frac_Frac-1_SII_12778_1_12778_2_1	2.21557	4.41421e-05	1.39544e-09	R.APLQVAVLGPTGVAEPVEVR.D	sp|Q14315|FLNC_HUMAN
U87MG_100ug_NHS_Rep1_5Frac_Frac-4_SII_10056_1_10056_3_1	2.21501	4.41421e-05	1.40213e-09	-.[UNIMOD:1]SK[UNIMOD:56]K[UNIMOD:56]ISGGSVVEMQGDEMTR.I	sp|O75874|IDHC_HUMAN
U87MG_100ug_NHS_Rep1_5Frac_Frac-3_SII_13227_1_13227_3_1	2.21491	4.41421e-05	1.40325e-09	R.EGQVEVLK[UNIMOD:56]ATEMVEVGADDDEGGAERGEAGDLR.R	sp|Q6NZI2|CAVN1_HUMAN
U87MG_100ug_NHS_Rep1_5Frac_Frac-2_SII_9282_1_9282_4_1	2.21474	4.41421e-05	1.40532e-09	R.NK[UNIMOD:56]TK[UNIMOD:56]EK[UNIMOD:56]GK[UNIMOD:56]NENSEC[UNIMOD:4]PK[UNIMOD:56]K[UNIMOD:56]EPK[UNIMOD:56]AK[UNIMOD:56]K[UNIMOD:56]AK[UNIMOD:56]VADK[UNIMOD:56]K[UNIMOD:56]AR.L	sp|Q9NW13|RBM28_HUMAN
U87MG_100ug_NHS_Rep1_5Frac_Frac-5_SII_9050_1_9050_2_1	2.21414	4.41421e-05	1.41254e-09	-.[UNIMOD:1]MM[UNIMOD:35]C[UNIMOD:4]GAPSATQPATAETQHIADQVR.S	sp|P04080|CYTB_HUMAN
U87MG_100ug_NHS_Rep1_5Frac_Frac-3_SII_15891_1_15891_3_1	2.21382	4.41421e-05	1.41637e-09	R.EQIC[UNIMOD:4]EVEEGDK[UNIMOD:56]PDVDK[UNIMOD:56]AVEAAQVAFQR.G	sp|P47895|AL1A3_HUMAN
U87MG_100ug_NHS_Rep1_5Frac_Frac-2_SII_9296_1_9296_2_1	2.21235	4.41421e-05	1.43418e-09	R.[UNIMOD:56]YHTSQSGDEMTSLSEYVSR.M	sp|P08238|HS90B_HUMAN
U87MG_100ug_NHS_Rep1_5Frac_Frac-1_SII_3521_1_3521_2_1	2.21227	4.41421e-05	1.43517e-09	-.[UNIMOD:1]AATGANAEK[UNIMOD:56]AESHNDC[UNIMOD:4]PVR.L	sp|Q16831|UPP1_HUMAN
U87MG_100ug_NHS_Rep1_5Frac_Frac-5_SII_9718_1_9718_2_1	2.21195	4.41421e-05	1.43908e-09	F.[UNIMOD:27]EK[UNIMOD:56]NEAIQAAHDAVAQEGQC[UNIMOD:4]R.V	sp|P09936|UCHL1_HUMAN
U87MG_100ug_NHS_Rep1_5Frac_Frac-2_SII_15199_1_15199_3_1	2.21189	4.41421e-05	1.43989e-09	E.[UNIMOD:27]EK[UNIMOD:56]SK[UNIMOD:56]SLAK[UNIMOD:56]LK[UNIMOD:56]NK[UNIMOD:56]HEAMITDLEER.L	sp|P35579|MYH9_HUMAN
U87MG_100ug_NHS_Rep1_5Frac_Frac-5_SII_10635_1_10635_3_1	2.2111	4.41421e-05	1.44965e-09	-.[UNIMOD:56]PEPAK[UNIMOD:56]SAPAPK[UNIMOD:56]K[UNIMOD:56]GSK[UNIMOD:56]K[UNIMOD:56]AVTK[UNIMOD:56]AQK[UNIMOD:56]K[UNIMOD:56]DGK[UNIMOD:56]K[UNIMOD:56]R.K	sp|P62807|H2B1C_HUMAN
U87MG_100ug_NHS_Rep1_5Frac_Frac-1_SII_15043_1_15043_3_1	2.21087	4.41421e-05	1.45245e-09	R.TEMEDLMSSK[UNIMOD:56]DDVGK[UNIMOD:56]SVHELEK[UNIMOD:56]SK[UNIMOD:56]R.A	sp|P35579|MYH9_HUMAN
U87MG_100ug_NHS_Rep1_5Frac_Frac-5_SII_24745_1_24745_3_1	2.21024	4.41421e-05	1.46028e-09	-.[UNIMOD:1]ASGVAVSDGVIK[UNIMOD:56]VFNDMK[UNIMOD:56]VR.K	sp|P23528|COF1_HUMAN
U87MG_100ug_NHS_Rep1_5Frac_Frac-5_SII_14789_1_14789_2_1	2.20703	4.41421e-05	1.50082e-09	-.[UNIMOD:56]MK[UNIMOD:56]FVYK[UNIMOD:56]EEHPFEK[UNIMOD:56]R.R	sp|O95166|GBRAP_HUMAN
U87MG_100ug_NHS_Rep1_5Frac_Frac-2_SII_18065_1_18065_3_1	2.20688	4.41421e-05	1.50267e-09	-.[UNIMOD:1]MLK[UNIMOD:56]K[UNIMOD:56]FDK[UNIMOD:56]K[UNIMOD:56]DEESGGGSNPFQHLEK[UNIMOD:56]SAVLQEAR.V	sp|Q9Y678|COPG1_HUMAN
U87MG_100ug_NHS_Rep1_5Frac_Frac-5_SII_10244_1_10244_3_1	2.20684	4.41421e-05	1.50315e-09	R.K[UNIMOD:56]AK[UNIMOD:56]K[UNIMOD:56]EAPPMEK[UNIMOD:56]PEVVK[UNIMOD:56]THLR.D	sp|P62841|RS15_HUMAN
U87MG_100ug_NHS_Rep1_5Frac_Frac-5_SII_11231_1_11231_3_1	2.20653	4.41421e-05	1.50711e-09	-.[UNIMOD:56]PGVTVK[UNIMOD:56]DVNQQEFVR.A	sp|P39019|RS19_HUMAN
U87MG_100ug_NHS_Rep1_5Frac_Frac-2_SII_14528_1_14528_2_1	2.20618	4.41421e-05	1.51168e-09	R.IEIESFYEGEDFSETLTR.A	sp|P11021|BIP_HUMAN
U87MG_100ug_NHS_Rep1_5Frac_Frac-1_SII_15810_1_15810_3_1	2.20581	4.41421e-05	1.51639e-09	E.[UNIMOD:27]EEEK[UNIMOD:56]SK[UNIMOD:56]SLAK[UNIMOD:56]LK[UNIMOD:56]NK[UNIMOD:56]HEAMITDLEER.L	sp|P35579|MYH9_HUMAN
U87MG_100ug_NHS_Rep1_5Frac_Frac-1_SII_14865_1_14865_2_1	2.20408	4.41421e-05	1.53899e-09	R.[UNIMOD:28]QLFHPEQLITGK[UNIMOD:56]EDAANNYAR.G	sp|P68363|TBA1B_HUMAN
U87MG_100ug_NHS_Rep1_5Frac_Frac-1_SII_13177_1_13177_2_1	2.204	4.41421e-05	1.54006e-09	R.VC[UNIMOD:4]ENIPIVLC[UNIMOD:4]GNK[UNIMOD:56]VDIK[UNIMOD:56]DR.K	sp|P62826|RAN_HUMAN
U87MG_100ug_NHS_Rep1_5Frac_Frac-4_SII_12341_1_12341_3_1	2.20363	4.41421e-05	1.54494e-09	R.FHVEEEGK[UNIMOD:56]GK[UNIMOD:56]DASGNK[UNIMOD:56]VK[UNIMOD:56]AEPAK[UNIMOD:56]IEAFR.A	sp|P00558|PGK1_HUMAN
U87MG_100ug_NHS_Rep1_5Frac_Frac-4_SII_18471_1_18471_3_1	2.20347	4.41421e-05	1.54704e-09	R.[UNIMOD:56]ALQASALK[UNIMOD:56]AWGGK[UNIMOD:56]K[UNIMOD:56]ENLK[UNIMOD:56]AAQEEYVK[UNIMOD:56]R.A	sp|P04075|ALDOA_HUMAN
U87MG_100ug_NHS_Rep1_5Frac_Frac-4_SII_13204_1_13204_2_1	2.20279	4.41421e-05	1.55598e-09	V.[UNIMOD:27]ESTGVFTTMEK[UNIMOD:56]AGAHLQGGAK[UNIMOD:56]R.V	sp|P04406|G3P_HUMAN
U87MG_100ug_NHS_Rep1_5Frac_Frac-1_SII_16410_1_16410_4_1	2.20271	4.41421e-05	1.55698e-09	-.[UNIMOD:1]SK[UNIMOD:56]PHSEAGTAFIQTQQLHAAMADTFLEHMC[UNIMOD:4]R.L	sp|P14618|KPYM_HUMAN
U87MG_100ug_NHS_Rep1_5Frac_Frac-1_SII_10004_1_10004_3_1	2.20238	4.41421e-05	1.56142e-09	R.[UNIMOD:27]ENPVYEK[UNIMOD:56]K[UNIMOD:56]PK[UNIMOD:56]K[UNIMOD:56]EVK[UNIMOD:56]K[UNIMOD:56]K[UNIMOD:56]R.W	sp|P46777|RL5_HUMAN
U87MG_100ug_NHS_Rep1_5Frac_Frac-3_SII_19767_1_19767_3_1	2.20184	4.41421e-05	1.56868e-09	R.AEGSDVANAVLDGADC[UNIMOD:4]IMLSGETAK[UNIMOD:56]GDYPLEAVR.M	sp|P14618|KPYM_HUMAN
U87MG_100ug_NHS_Rep1_5Frac_Frac-2_SII_21694_1_21694_3_1	2.20158	4.41421e-05	1.57207e-09	R.[UNIMOD:56]SGVSLAALK[UNIMOD:56]K[UNIMOD:56]ALAAAGYDVEK[UNIMOD:56]NNSR.I	sp|P16403|H12_HUMAN
U87MG_100ug_NHS_Rep1_5Frac_Frac-1_SII_7216_1_7216_3_1	2.20088	4.41421e-05	1.58148e-09	R.MPSGK[UNIMOD:56]TARPNITDNK[UNIMOD:56]DGTITVR.Y	sp|Q14315|FLNC_HUMAN
U87MG_100ug_NHS_Rep1_5Frac_Frac-5_SII_10222_1_10222_3_1	2.19917	4.41421e-05	1.60478e-09	R.K[UNIMOD:56]AK[UNIMOD:56]K[UNIMOD:56]EAPPMEK[UNIMOD:56]PEVVK[UNIMOD:56]THLR.D	sp|P62841|RS15_HUMAN
U87MG_100ug_NHS_Rep1_5Frac_Frac-3_SII_22781_1_22781_3_1	2.19861	4.41421e-05	1.6124e-09	R.[UNIMOD:56]GLK[UNIMOD:56]M[UNIMOD:35]AVTFIGNSTAIQELFK[UNIMOD:56]R.I	sp|P07437|TBB5_HUMAN
U87MG_100ug_NHS_Rep1_5Frac_Frac-4_SII_15919_1_15919_3_1	2.19853	4.41421e-05	1.61352e-09	-.[UNIMOD:1]DDDIAALVVDNGSGMC[UNIMOD:4]K[UNIMOD:56]AGFAGDDAPR.A	sp|P60709|ACTB_HUMAN
U87MG_100ug_NHS_Rep1_5Frac_Frac-2_SII_20792_1_20792_3_1	2.19827	4.41421e-05	1.61707e-09	R.[UNIMOD:27]EEK[UNIMOD:56]QK[UNIMOD:56]K[UNIMOD:56]LIELQAGK[UNIMOD:56]K[UNIMOD:56]SLEDQVEMLR.T	sp|P14314|GLU2B_HUMAN
U87MG_100ug_NHS_Rep1_5Frac_Frac-1_SII_23172_1_23172_3_1	2.19797	4.41421e-05	1.62123e-09	R.[UNIMOD:56]SSIAGLLLK[UNIMOD:56]ATNEK[UNIMOD:56]LSVYAALQR.Q	sp|Q15149|PLEC_HUMAN
U87MG_100ug_NHS_Rep1_5Frac_Frac-2_SII_9966_1_9966_4_1	2.19715	4.41421e-05	1.63266e-09	R.DTHK[UNIMOD:56]K[UNIMOD:56]LEEEK[UNIMOD:56]GK[UNIMOD:56]K[UNIMOD:56]EK[UNIMOD:56]ERQEIEK[UNIMOD:56]ER.R	sp|P49756|RBM25_HUMAN
U87MG_100ug_NHS_Rep1_5Frac_Frac-4_SII_11863_1_11863_3_1	2.19689	4.41421e-05	1.63629e-09	R.FHVEEEGK[UNIMOD:56]GK[UNIMOD:56]DASGNK[UNIMOD:56]VK[UNIMOD:56]AEPAK[UNIMOD:56]IEAFR.A	sp|P00558|PGK1_HUMAN
U87MG_100ug_NHS_Rep1_5Frac_Frac-5_SII_23044_1_23044_3_1	2.19649	4.41421e-05	1.64181e-09	-.[UNIMOD:1]ASGVAVSDGVIK[UNIMOD:56]VFNDMK[UNIMOD:56]VR.K	sp|P23528|COF1_HUMAN
U87MG_100ug_NHS_Rep1_5Frac_Frac-4_SII_16420_1_16420_2_1	2.19607	4.41421e-05	1.64765e-09	-.[UNIMOD:1]DDDIAALVVDNGSGMC[UNIMOD:4]K[UNIMOD:56]AGFAGDDAPR.A	sp|P60709|ACTB_HUMAN
U87MG_100ug_NHS_Rep1_5Frac_Frac-5_SII_13005_1_13005_3_1	2.1952	4.41421e-05	1.66e-09	-.[UNIMOD:1]M[UNIMOD:35]EGVEEK[UNIMOD:56]K[UNIMOD:56]K[UNIMOD:56]EVPAVPETLK[UNIMOD:56]K[UNIMOD:56]K[UNIMOD:56]R.R	sp|P18124|RL7_HUMAN
U87MG_100ug_NHS_Rep1_5Frac_Frac-5_SII_19481_1_19481_3_1	2.19504	4.41421e-05	1.66222e-09	-.[UNIMOD:1]MIK[UNIMOD:56]LFSLK[UNIMOD:56]QQK[UNIMOD:56]K[UNIMOD:56]EEESAGGTK[UNIMOD:56]GSSK[UNIMOD:56]K[UNIMOD:56]ASAAQLR.I	sp|P61081|UBC12_HUMAN
U87MG_100ug_NHS_Rep1_5Frac_Frac-2_SII_8527_1_8527_3_1	2.19416	4.41421e-05	1.67467e-09	R.K[UNIMOD:56]K[UNIMOD:56]K[UNIMOD:56]ETDQK[UNIMOD:56]K[UNIMOD:56]EAVAPVQEESDLEK[UNIMOD:56]K[UNIMOD:56]RR.E	sp|Q13409|DC1I2_HUMAN
U87MG_100ug_NHS_Rep1_5Frac_Frac-1_SII_17566_1_17566_2_1	2.19415	4.41421e-05	1.67482e-09	R.EDLVVAPAGITLK[UNIMOD:56]EANEILQR.S	sp|P12268|IMDH2_HUMAN
U87MG_100ug_NHS_Rep1_5Frac_Frac-2_SII_14876_1_14876_2_1	2.19341	4.41421e-05	1.68545e-09	R.[UNIMOD:56]SDK[UNIMOD:56]VPDNK[UNIMOD:56]NTHTLLLAGVFR.G	sp|Q9Y678|COPG1_HUMAN
U87MG_100ug_NHS_Rep1_5Frac_Frac-3_SII_14861_1_14861_2_1	2.19329	4.41421e-05	1.68726e-09	R.[UNIMOD:56]QLFHPEQLITGK[UNIMOD:56]EDAANNYAR.G	sp|P68363|TBA1B_HUMAN
U87MG_100ug_NHS_Rep1_5Frac_Frac-1_SII_14419_1_14419_3_1	2.19296	4.41421e-05	1.69191e-09	R.YESLTDPSK[UNIMOD:56]LDSGK[UNIMOD:56]ELHINLIPNK[UNIMOD:56]QDR.T	sp|P07900|HS90A_HUMAN
U87MG_100ug_NHS_Rep1_5Frac_Frac-3_SII_10369_1_10369_2_1	2.19242	4.41421e-05	1.69977e-09	R.EM[UNIMOD:35]EENFAVEAANYQDTIGR.L	sp|P08670|VIME_HUMAN
U87MG_100ug_NHS_Rep1_5Frac_Frac-3_SII_14303_1_14303_3_1	2.19219	4.41421e-05	1.70308e-09	R.NTTIPTK[UNIMOD:56]QTQTFTTYSDNQPGVLIQVYEGER.A	sp|P11142|HSP7C_HUMAN
U87MG_100ug_NHS_Rep1_5Frac_Frac-4_SII_12008_1_12008_3_1	2.19215	4.41421e-05	1.70363e-09	R.FHVEEEGK[UNIMOD:56]GK[UNIMOD:56]DASGNK[UNIMOD:56]VK[UNIMOD:56]AEPAK[UNIMOD:56]IEAFR.A	sp|P00558|PGK1_HUMAN
U87MG_100ug_NHS_Rep1_5Frac_Frac-4_SII_13481_1_13481_3_1	2.19104	4.41421e-05	1.71983e-09	R.FHVEEEGK[UNIMOD:56]GK[UNIMOD:56]DASGNK[UNIMOD:56]VK[UNIMOD:56]AEPAK[UNIMOD:56]IEAFR.A	sp|P00558|PGK1_HUMAN
U87MG_100ug_NHS_Rep1_5Frac_Frac-4_SII_11765_1_11765_3_1	2.19087	4.41421e-05	1.72236e-09	R.FHVEEEGK[UNIMOD:56]GK[UNIMOD:56]DASGNK[UNIMOD:56]VK[UNIMOD:56]AEPAK[UNIMOD:56]IEAFR.A	sp|P00558|PGK1_HUMAN
U87MG_100ug_NHS_Rep1_5Frac_Frac-5_SII_8645_1_8645_3_1	2.19057	4.41421e-05	1.72676e-09	R.EEHK[UNIMOD:56]K[UNIMOD:56]K[UNIMOD:56]HPDASVNFSEFSK[UNIMOD:56]K[UNIMOD:56]C[UNIMOD:4]SER.W	sp|P09429|HMGB1_HUMAN
U87MG_100ug_NHS_Rep1_5Frac_Frac-2_SII_2232_1_2232_2_1	2.19055	4.41421e-05	1.72702e-09	R.VSQGSK[UNIMOD:56]DPAEGDGAQPEETPR.D	sp|Q14697|GANAB_HUMAN
U87MG_100ug_NHS_Rep1_5Frac_Frac-2_SII_18791_1_18791_3_1	2.19038	4.41421e-05	1.72956e-09	-.[UNIMOD:1]ASMGTLAFDEYGRPFLIIK[UNIMOD:56]DQDR.K	sp|P48643|TCPE_HUMAN
U87MG_100ug_NHS_Rep1_5Frac_Frac-1_SII_15032_1_15032_3_1	2.18981	4.41421e-05	1.73799e-09	S.[UNIMOD:27]EAGTAFIQTQQLHAAMADTFLEHM[UNIMOD:35]C[UNIMOD:4]R.L	sp|P14618|KPYM_HUMAN
U87MG_100ug_NHS_Rep1_5Frac_Frac-3_SII_4526_1_4526_2_1	2.1897	4.41421e-05	1.73962e-09	D.PAAAPAEAEEQAVEAR.Q	sp|P84157|MXRA7_HUMAN
U87MG_100ug_NHS_Rep1_5Frac_Frac-3_SII_19636_1_19636_3_1	2.18904	4.41421e-05	1.74943e-09	R.[UNIMOD:56]K[UNIMOD:56]DGNASGTTLLEALDC[UNIMOD:4]ILPPTRPTDK[UNIMOD:56]PLR.L	sp|P68104|EF1A1_HUMAN
U87MG_100ug_NHS_Rep1_5Frac_Frac-3_SII_10673_1_10673_3_1	2.18855	4.41421e-05	1.75669e-09	R.ENENGEEEEEEAEFGEEDLFHQQGDPR.T	sp|Q03252|LMNB2_HUMAN
U87MG_100ug_NHS_Rep1_5Frac_Frac-4_SII_8778_1_8778_2_1	2.18835	4.41421e-05	1.75971e-09	R.[UNIMOD:1]HQGVM[UNIMOD:35]VGMGQK[UNIMOD:56]DSYVGDEAQSK[UNIMOD:56]R.G	sp|P60709|ACTB_HUMAN
U87MG_100ug_NHS_Rep1_5Frac_Frac-5_SII_7744_1_7744_3_1	2.18774	4.41421e-05	1.76894e-09	K.SAPAPK[UNIMOD:56]K[UNIMOD:56]GSK[UNIMOD:56]K[UNIMOD:56]AVTK[UNIMOD:56]AQK[UNIMOD:56]K[UNIMOD:56]DGK[UNIMOD:56]K[UNIMOD:56]R.K	sp|P62807|H2B1C_HUMAN
U87MG_100ug_NHS_Rep1_5Frac_Frac-4_SII_18521_1_18521_3_1	2.18756	4.41421e-05	1.77164e-09	R.K[UNIMOD:56]DGNASGTTLLEALDC[UNIMOD:4]ILPPTRPTDK[UNIMOD:56]PLR.L	sp|P68104|EF1A1_HUMAN
U87MG_100ug_NHS_Rep1_5Frac_Frac-5_SII_14777_1_14777_2_1	2.1874	4.41421e-05	1.77403e-09	R.[UNIMOD:28]QLFHPEQLITGK[UNIMOD:56]EDAANNYAR.G	sp|P68363|TBA1B_HUMAN
U87MG_100ug_NHS_Rep1_5Frac_Frac-4_SII_14406_1_14406_3_1	2.18684	4.41421e-05	1.78262e-09	R.NVASVC[UNIMOD:4]LQIGYPTVASVPHSIINGYK[UNIMOD:56]R.V	sp|P05388|RLA0_HUMAN
U87MG_100ug_NHS_Rep1_5Frac_Frac-2_SII_17706_1_17706_2_1	2.18646	4.41421e-05	1.78831e-09	R.[UNIMOD:56]IFHELTQTDK[UNIMOD:56]ALFNR.L	sp|P11586|C1TC_HUMAN
U87MG_100ug_NHS_Rep1_5Frac_Frac-1_SII_13798_1_13798_3_1	2.18599	4.41421e-05	1.79554e-09	R.TEK[UNIMOD:56]K[UNIMOD:56]LK[UNIMOD:56]DVLLQVDDERR.N	sp|P35579|MYH9_HUMAN
U87MG_100ug_NHS_Rep1_5Frac_Frac-1_SII_3412_1_3412_2_1	2.18564	4.41421e-05	1.80087e-09	-.[UNIMOD:1]AATGANAEK[UNIMOD:56]AESHNDC[UNIMOD:4]PVR.L	sp|Q16831|UPP1_HUMAN
U87MG_100ug_NHS_Rep1_5Frac_Frac-5_SII_16682_1_16682_3_1	2.18504	4.41421e-05	1.81018e-09	R.QK[UNIMOD:56]DVK[UNIMOD:56]DGK[UNIMOD:56]YSQVLANGLDNK[UNIMOD:56]LREDLER.L	sp|P62269|RS18_HUMAN
U87MG_100ug_NHS_Rep1_5Frac_Frac-5_SII_17128_1_17128_3_1	2.18377	4.41421e-05	1.82977e-09	-.ASGVAVSDGVIK[UNIMOD:56]VFNDMK[UNIMOD:56]VR.K	sp|P23528|COF1_HUMAN
U87MG_100ug_NHS_Rep1_5Frac_Frac-5_SII_9265_1_9265_3_1	2.1833	4.41421e-05	1.8372e-09	-.PEPTK[UNIMOD:56]SAPAPK[UNIMOD:56]K[UNIMOD:56]GSK[UNIMOD:56]K[UNIMOD:56]AVTK[UNIMOD:56]AQK[UNIMOD:56]K[UNIMOD:56]DGK[UNIMOD:56]K[UNIMOD:56]R.K	sp|P58876|H2B1D_HUMAN
U87MG_100ug_NHS_Rep1_5Frac_Frac-4_SII_7485_1_7485_4_1	2.1832	4.41421e-05	1.83869e-09	R.HQGVMVGMGQK[UNIMOD:56]DSYVGDEAQSK[UNIMOD:56]R.G	sp|P60709|ACTB_HUMAN
U87MG_100ug_NHS_Rep1_5Frac_Frac-1_SII_16504_1_16504_3_1	2.18298	4.41421e-05	1.84216e-09	R.K[UNIMOD:56]EEQEVQATLESEEVDLNAGLHGNWTLENAK[UNIMOD:56]AR.L	sp|Q08211|DHX9_HUMAN
U87MG_100ug_NHS_Rep1_5Frac_Frac-5_SII_14732_1_14732_2_1	2.18277	4.41421e-05	1.84552e-09	R.[UNIMOD:28]QLFHPEQLITGK[UNIMOD:56]EDAANNYAR.G	sp|P68363|TBA1B_HUMAN
U87MG_100ug_NHS_Rep1_5Frac_Frac-4_SII_13030_1_13030_3_1	2.18126	4.41421e-05	1.86937e-09	R.NALLSLAK[UNIMOD:56]GDRSEDFGVNEDLADSDAR.A	sp|P04083|ANXA1_HUMAN
U87MG_100ug_NHS_Rep1_5Frac_Frac-3_SII_22761_1_22761_3_1	2.18095	4.41421e-05	1.87433e-09	R.NLEALALDLMEPEQAVDLTLPK[UNIMOD:56]VEAMNK[UNIMOD:56]R.L	sp|P12956|XRCC6_HUMAN
U87MG_100ug_NHS_Rep1_5Frac_Frac-1_SII_18329_1_18329_4_1	2.18071	4.41421e-05	1.87811e-09	R.AGK[UNIMOD:56]PVIC[UNIMOD:4]ATQMLESMIK[UNIMOD:56]K[UNIMOD:56]PRPTR.A	sp|P14618|KPYM_HUMAN
U87MG_100ug_NHS_Rep1_5Frac_Frac-3_SII_6041_1_6041_3_1	2.18045	4.41421e-05	1.88229e-09	R.[UNIMOD:56]SHEVK[UNIMOD:56]AEGYEVAHGGR.C	sp|P53041|PPP5_HUMAN
U87MG_100ug_NHS_Rep1_5Frac_Frac-4_SII_11434_1_11434_2_1	2.18032	4.41421e-05	1.88433e-09	R.EMEENFAVEAANYQDTIGR.L	sp|P08670|VIME_HUMAN
U87MG_100ug_NHS_Rep1_5Frac_Frac-4_SII_10035_1_10035_2_1	2.17958	4.41421e-05	1.89632e-09	R.DGK[UNIMOD:56]YDLDFK[UNIMOD:56]SPTDPSR.Y	sp|P09104|ENOG_HUMAN
U87MG_100ug_NHS_Rep1_5Frac_Frac-2_SII_12073_1_12073_2_1	2.17944	4.41421e-05	1.89851e-09	R.PFPDGLAEDIDK[UNIMOD:56]GEVSAR.Q	sp|P13639|EF2_HUMAN
U87MG_100ug_NHS_Rep1_5Frac_Frac-1_SII_11126_1_11126_3_1	2.17881	4.41421e-05	1.90874e-09	R.SSLQSQC[UNIMOD:4]LNEVLK[UNIMOD:56]AERPDVDEK[UNIMOD:56]R.S	sp|Q14204|DYHC1_HUMAN
U87MG_100ug_NHS_Rep1_5Frac_Frac-5_SII_8818_1_8818_3_1	2.17782	4.41421e-05	1.92502e-09	-.[UNIMOD:1]PEPAK[UNIMOD:56]SAPAPK[UNIMOD:56]K[UNIMOD:56]GSK[UNIMOD:56]K[UNIMOD:56]AVTK[UNIMOD:56]AQK[UNIMOD:56]K[UNIMOD:56]DGK[UNIMOD:56]K[UNIMOD:56]R.K	sp|P62807|H2B1C_HUMAN
U87MG_100ug_NHS_Rep1_5Frac_Frac-3_SII_20005_1_20005_4_1	2.17776	4.41421e-05	1.92597e-09	R.VK[UNIMOD:56]EK[UNIMOD:56]EAELK[UNIMOD:56]EAEK[UNIMOD:56]ELHEK[UNIMOD:56]FDLLK[UNIMOD:56]R.T	sp|Q9NVA2|SEP11_HUMAN
U87MG_100ug_NHS_Rep1_5Frac_Frac-2_SII_16608_1_16608_2_1	2.17675	4.41421e-05	1.94265e-09	R.ETVVEVPQVTWEDIGGLEDVK[UNIMOD:56]R.E	sp|P55072|TERA_HUMAN
U87MG_100ug_NHS_Rep1_5Frac_Frac-5_SII_19158_1_19158_2_1	2.17624	4.41421e-05	1.95108e-09	R.K[UNIMOD:56]AMK[UNIMOD:56]GLGTDEESILTLLTSR.S	sp|P08758|ANXA5_HUMAN
U87MG_100ug_NHS_Rep1_5Frac_Frac-3_SII_12024_1_12024_3_1	2.17608	4.41421e-05	1.95379e-09	R.EK[UNIMOD:56]LQEEMLQREEAENTLQSFR.Q	sp|P08670|VIME_HUMAN
U87MG_100ug_NHS_Rep1_5Frac_Frac-3_SII_13258_1_13258_3_1	2.17584	4.41421e-05	1.95776e-09	R.EGQVEVLK[UNIMOD:56]ATEMVEVGADDDEGGAERGEAGDLR.R	sp|Q6NZI2|CAVN1_HUMAN
U87MG_100ug_NHS_Rep1_5Frac_Frac-1_SII_10368_1_10368_2_1	2.17568	4.41421e-05	1.96037e-09	R.LGIEK[UNIMOD:56]TDPTTLTDEEINR.F	sp|P11586|C1TC_HUMAN
U87MG_100ug_NHS_Rep1_5Frac_Frac-2_SII_17956_1_17956_3_1	2.17525	4.41421e-05	1.96763e-09	R.[UNIMOD:27][UNIMOD:56]ESC[UNIMOD:4]LEAYTGIVQGLK[UNIMOD:56]GDQENVHPDVMLVQPR.V	sp|Q14974|IMB1_HUMAN
U87MG_100ug_NHS_Rep1_5Frac_Frac-3_SII_21956_1_21956_3_1	2.17514	4.41421e-05	1.96945e-09	R.[UNIMOD:56]GLK[UNIMOD:56]MSATFIGNSTAIQELFK[UNIMOD:56]R.I	sp|P68371|TBB4B_HUMAN
U87MG_100ug_NHS_Rep1_5Frac_Frac-4_SII_1727_1_1727_3_1	2.17388	4.41421e-05	1.99067e-09	R.[UNIMOD:27]EDGNEEDK[UNIMOD:56]ENQGDETQGQQPPQRR.Y	sp|P67809|YBOX1_HUMAN
U87MG_100ug_NHS_Rep1_5Frac_Frac-5_SII_3283_1_3283_2_1	2.17312	4.41421e-05	2.00363e-09	-.[UNIMOD:1]AATGANAEK[UNIMOD:56]AESHNDC[UNIMOD:4]PVR.L	sp|Q16831|UPP1_HUMAN
U87MG_100ug_NHS_Rep1_5Frac_Frac-1_SII_13037_1_13037_2_1	2.17199	4.41421e-05	2.02312e-09	R.QVQSLTC[UNIMOD:4]EVDALK[UNIMOD:56]GTNESLER.Q	sp|P08670|VIME_HUMAN
U87MG_100ug_NHS_Rep1_5Frac_Frac-2_SII_22052_1_22052_3_1	2.17014	4.41421e-05	2.05524e-09	-.[UNIMOD:56]MLWFQGAIPAAIATAK[UNIMOD:56]R.S	sp|Q92575|UBXN4_HUMAN
U87MG_100ug_NHS_Rep1_5Frac_Frac-4_SII_16477_1_16477_3_1	2.16724	4.41421e-05	2.10665e-09	R.FHVEEEGK[UNIMOD:56]GK[UNIMOD:56]DASGNK[UNIMOD:56]VK[UNIMOD:56]AEPAK[UNIMOD:56]IEAFR.A	sp|P00558|PGK1_HUMAN
U87MG_100ug_NHS_Rep1_5Frac_Frac-5_SII_14295_1_14295_3_1	2.16723	4.41421e-05	2.10684e-09	R.[UNIMOD:56]YDDMAAAMK[UNIMOD:56]AVTEQGHELSNEER.N	sp|P31946|1433B_HUMAN
U87MG_100ug_NHS_Rep1_5Frac_Frac-4_SII_23454_1_23454_3_1	2.16671	4.41421e-05	2.11623e-09	-.[UNIMOD:1]DDDIAALVVDNGSGMC[UNIMOD:4]K[UNIMOD:56]AGFAGDDAPR.A	sp|P60709|ACTB_HUMAN
U87MG_100ug_NHS_Rep1_5Frac_Frac-1_SII_9678_1_9678_2_1	2.16626	4.41421e-05	2.12428e-09	R.SGK[UNIMOD:56]YDLDFK[UNIMOD:56]SPDDPSR.Y	sp|P06733|ENOA_HUMAN
U87MG_100ug_NHS_Rep1_5Frac_Frac-4_SII_9924_1_9924_2_1	2.16579	4.41421e-05	2.13275e-09	R.VAPEEHPVLLTEAPLNPK[UNIMOD:56]ANR.E	sp|P60709|ACTB_HUMAN
U87MG_100ug_NHS_Rep1_5Frac_Frac-5_SII_19316_1_19316_3_1	2.16544	4.41421e-05	2.13916e-09	-.[UNIMOD:1]ATNFLAHEK[UNIMOD:56]IWFDK[UNIMOD:56]FK[UNIMOD:56]YDDAERR.F	sp|P29692|EF1D_HUMAN
U87MG_100ug_NHS_Rep1_5Frac_Frac-3_SII_14846_1_14846_3_1	2.16513	4.41421e-05	2.14483e-09	S.[UNIMOD:27]EAGTAFIQTQQLHAAMADTFLEHMC[UNIMOD:4]R.L	sp|P14618|KPYM_HUMAN
U87MG_100ug_NHS_Rep1_5Frac_Frac-3_SII_22429_1_22429_3_1	2.16492	4.41421e-05	2.14871e-09	R.DASLMVTNDGATILK[UNIMOD:56]NIGVDNPAAK[UNIMOD:56]VLVDMSR.V	sp|P78371|TCPB_HUMAN
U87MG_100ug_NHS_Rep1_5Frac_Frac-2_SII_14871_1_14871_3_1	2.1645	4.41421e-05	2.15643e-09	R.[UNIMOD:27]EHGAFDAVK[UNIMOD:56]C[UNIMOD:4]THWAEGGK[UNIMOD:56]GALALAQAVQR.A	sp|P11586|C1TC_HUMAN
U87MG_100ug_NHS_Rep1_5Frac_Frac-5_SII_22803_1_22803_3_1	2.16331	4.41421e-05	2.17832e-09	-.[UNIMOD:1]ASGVAVSDGVIK[UNIMOD:56]VFNDMK[UNIMOD:56]VR.K	sp|P23528|COF1_HUMAN
U87MG_100ug_NHS_Rep1_5Frac_Frac-4_SII_5501_1_5501_2_1	2.16289	4.41421e-05	2.18622e-09	R.[UNIMOD:56]TLHSDDEGTVLDDSR.A	sp|O00170|AIP_HUMAN
U87MG_100ug_NHS_Rep1_5Frac_Frac-3_SII_8174_1_8174_2_1	2.16279	4.41421e-05	2.188e-09	R.ILGADTSVDLEETGR.V	sp|P25705|ATPA_HUMAN
U87MG_100ug_NHS_Rep1_5Frac_Frac-4_SII_8279_1_8279_3_1	2.16228	4.41421e-05	2.19756e-09	R.VVSSIEQK[UNIMOD:56]TEGAEK[UNIMOD:56]K[UNIMOD:56]QQMAR.E	sp|P63104|1433Z_HUMAN
U87MG_100ug_NHS_Rep1_5Frac_Frac-2_SII_17504_1_17504_3_1	2.16134	4.41421e-05	2.21518e-09	-.[UNIMOD:56]PVTEK[UNIMOD:56]DLAEDAPWK[UNIMOD:56]K[UNIMOD:56]IQQNTFTR.W	sp|O75369|FLNB_HUMAN
U87MG_100ug_NHS_Rep1_5Frac_Frac-1_SII_18760_1_18760_3_1	2.16096	4.41421e-05	2.22242e-09	Q.[UNIMOD:27]EVNILK[UNIMOD:56]K[UNIMOD:56]TLEEEAK[UNIMOD:56]THEAQIQEMR.Q	sp|P35579|MYH9_HUMAN
U87MG_100ug_NHS_Rep1_5Frac_Frac-5_SII_10846_1_10846_3_1	2.16037	4.41421e-05	2.23366e-09	-.[UNIMOD:56]PDPAK[UNIMOD:56]SAPAPK[UNIMOD:56]K[UNIMOD:56]GSK[UNIMOD:56]K[UNIMOD:56]AVTK[UNIMOD:56]AQK[UNIMOD:56]K[UNIMOD:56]DGK[UNIMOD:56]K[UNIMOD:56]R.K	sp|P23527|H2B1O_HUMAN
U87MG_100ug_NHS_Rep1_5Frac_Frac-3_SII_17321_1_17321_3_1	2.16006	4.41421e-05	2.23951e-09	S.[UNIMOD:27][UNIMOD:56]EAGTAFIQTQQLHAAMADTFLEHMC[UNIMOD:4]R.L	sp|P14618|KPYM_HUMAN
U87MG_100ug_NHS_Rep1_5Frac_Frac-4_SII_16381_1_16381_3_1	2.16	4.41421e-05	2.24061e-09	-.[UNIMOD:1]MDEAVGDLK[UNIMOD:56]QALPC[UNIMOD:4]VAESPTVHVEVHQR.G	sp|Q15645|PCH2_HUMAN
U87MG_100ug_NHS_Rep1_5Frac_Frac-4_SII_14014_1_14014_3_1	2.1596	4.41421e-05	2.24826e-09	R.FHVEEEGK[UNIMOD:56]GK[UNIMOD:56]DASGNK[UNIMOD:56]VK[UNIMOD:56]AEPAK[UNIMOD:56]IEAFR.A	sp|P00558|PGK1_HUMAN
U87MG_100ug_NHS_Rep1_5Frac_Frac-2_SII_18389_1_18389_3_1	2.15955	4.41421e-05	2.24928e-09	R.[UNIMOD:28][UNIMOD:56]QK[UNIMOD:56]K[UNIMOD:56]ESEAVEWQQK[UNIMOD:56]AQMVQEDLEK[UNIMOD:56]TR.A	sp|P26038|MOES_HUMAN
U87MG_100ug_NHS_Rep1_5Frac_Frac-3_SII_19485_1_19485_3_1	2.15919	4.41421e-05	2.25628e-09	R.[UNIMOD:56]GLK[UNIMOD:56]M[UNIMOD:35]SATFIGNSTAIQELFK[UNIMOD:56]R.I	sp|P68371|TBB4B_HUMAN
U87MG_100ug_NHS_Rep1_5Frac_Frac-4_SII_13639_1_13639_3_1	2.159	4.41421e-05	2.25998e-09	R.FHVEEEGK[UNIMOD:56]GK[UNIMOD:56]DASGNK[UNIMOD:56]VK[UNIMOD:56]AEPAK[UNIMOD:56]IEAFR.A	sp|P00558|PGK1_HUMAN
U87MG_100ug_NHS_Rep1_5Frac_Frac-3_SII_21852_1_21852_3_1	2.15898	4.41421e-05	2.26019e-09	R.[UNIMOD:56]GLK[UNIMOD:56]MSATFIGNSTAIQELFK[UNIMOD:56]R.I	sp|P68371|TBB4B_HUMAN
U87MG_100ug_NHS_Rep1_5Frac_Frac-1_SII_14933_1_14933_3_1	2.15882	4.41421e-05	2.26327e-09	S.[UNIMOD:27]EAGTAFIQTQQLHAAMADTFLEHMC[UNIMOD:4]R.L	sp|P14618|KPYM_HUMAN
U87MG_100ug_NHS_Rep1_5Frac_Frac-2_SII_15597_1_15597_3_1	2.15861	4.41421e-05	2.26737e-09	R.TDMDQIITSK[UNIMOD:56]EHLASK[UNIMOD:56]IR.A	sp|Q96TA1|NIBL1_HUMAN
U87MG_100ug_NHS_Rep1_5Frac_Frac-2_SII_4008_1_4008_2_1	2.15738	4.41421e-05	2.29128e-09	R.DHALLEEQSK[UNIMOD:56]QQSNEHLR.R	sp|O43707|ACTN4_HUMAN
U87MG_100ug_NHS_Rep1_5Frac_Frac-2_SII_17924_1_17924_3_1	2.15695	4.41421e-05	2.29978e-09	R.[UNIMOD:27][UNIMOD:56]ESC[UNIMOD:4]LEAYTGIVQGLK[UNIMOD:56]GDQENVHPDVMLVQPR.V	sp|Q14974|IMB1_HUMAN
U87MG_100ug_NHS_Rep1_5Frac_Frac-4_SII_16147_1_16147_2_1	2.15667	4.41421e-05	2.30529e-09	-.[UNIMOD:1]DDDIAALVVDNGSGMC[UNIMOD:4]K[UNIMOD:56]AGFAGDDAPR.A	sp|P60709|ACTB_HUMAN
U87MG_100ug_NHS_Rep1_5Frac_Frac-1_SII_17580_1_17580_4_1	2.1564	4.41421e-05	2.31054e-09	R.IAEFTTNLTEEEEK[UNIMOD:56]SK[UNIMOD:56]SLAK[UNIMOD:56]LK[UNIMOD:56]NK[UNIMOD:56]HEAMITDLEER.L	sp|P35579|MYH9_HUMAN
U87MG_100ug_NHS_Rep1_5Frac_Frac-4_SII_11318_1_11318_2_1	2.15637	4.41421e-05	2.31119e-09	R.[UNIMOD:56]SELHIENLNMEADPGQYR.C	sp|P35613|BASI_HUMAN
U87MG_100ug_NHS_Rep1_5Frac_Frac-1_SII_8846_1_8846_3_1	2.15527	4.41421e-05	2.33288e-09	-.[UNIMOD:1]AASAAAASAAAASAASGSPGPGEGSAGGEK[UNIMOD:56]R.S	sp|Q13263|TIF1B_HUMAN
U87MG_100ug_NHS_Rep1_5Frac_Frac-1_SII_18169_1_18169_3_1	2.15363	4.41421e-05	2.36566e-09	R.NTDQASM[UNIMOD:35]PDNTAAQK[UNIMOD:56]VSHLLGINVTDFTR.G	sp|P35579|MYH9_HUMAN
U87MG_100ug_NHS_Rep1_5Frac_Frac-1_SII_12768_1_12768_3_1	2.15358	4.41421e-05	2.36676e-09	R.[UNIMOD:56]GQHVTGSPFQFTVGPLGEGGAHK[UNIMOD:56]VR.A	sp|O75369|FLNB_HUMAN
U87MG_100ug_NHS_Rep1_5Frac_Frac-5_SII_21927_1_21927_3_1	2.15328	4.41421e-05	2.37287e-09	-.[UNIMOD:1]AAAAELSLLEK[UNIMOD:56]SLGLSK[UNIMOD:56]GNK[UNIMOD:56]YSAQGER.Q	sp|O43324|MCA3_HUMAN
U87MG_100ug_NHS_Rep1_5Frac_Frac-1_SII_18053_1_18053_3_1	2.15317	4.41421e-05	2.37505e-09	R.IDALEK[UNIMOD:56]AGQK[UNIMOD:56]LIDVNHYAK[UNIMOD:56]DEVAAR.M	sp|Q13813|SPTN1_HUMAN
U87MG_100ug_NHS_Rep1_5Frac_Frac-1_SII_16740_1_16740_2_1	2.15221	4.41421e-05	2.3946e-09	R.ETVVEVPQVTWEDIGGLEDVK[UNIMOD:56]R.E	sp|P55072|TERA_HUMAN
U87MG_100ug_NHS_Rep1_5Frac_Frac-3_SII_11517_1_11517_2_1	2.15206	4.41421e-05	2.39758e-09	R.EMEENFAVEAANYQDTIGR.L	sp|P08670|VIME_HUMAN
U87MG_100ug_NHS_Rep1_5Frac_Frac-5_SII_19737_1_19737_3_1	2.15188	4.41421e-05	2.40132e-09	-.[UNIMOD:1]ASGVAVSDGVIK[UNIMOD:56]VFNDMK[UNIMOD:56]VR.K	sp|P23528|COF1_HUMAN
U87MG_100ug_NHS_Rep1_5Frac_Frac-3_SII_2742_1_2742_2_1	2.15132	4.41421e-05	2.41274e-09	R.SHENK[UNIMOD:56]SVAQQASLTEQR.L	sp|P52306|GDS1_HUMAN
U87MG_100ug_NHS_Rep1_5Frac_Frac-3_SII_17023_1_17023_2_1	2.15103	4.41421e-05	2.41865e-09	R.IDNDGDGFVTTEELK[UNIMOD:56]TWIK[UNIMOD:56]R.V	sp|Q15293|RCN1_HUMAN
U87MG_100ug_NHS_Rep1_5Frac_Frac-1_SII_17533_1_17533_3_1	2.15046	4.41421e-05	2.43057e-09	R.LEGENTQDK[UNIMOD:56]NK[UNIMOD:56]K[UNIMOD:56]LRPLYDIPYMFEAR.E	sp|Q7KZF4|SND1_HUMAN
U87MG_100ug_NHS_Rep1_5Frac_Frac-4_SII_23640_1_23640_3_1	2.15012	4.41421e-05	2.43759e-09	-.[UNIMOD:1]DDDIAALVVDNGSGMC[UNIMOD:4]K[UNIMOD:56]AGFAGDDAPR.A	sp|P60709|ACTB_HUMAN
U87MG_100ug_NHS_Rep1_5Frac_Frac-4_SII_17250_1_17250_3_1	2.14984	4.41421e-05	2.44341e-09	-.[UNIMOD:1]EEEIAALVIDNGSGMC[UNIMOD:4]K[UNIMOD:56]AGFAGDDAPR.A	sp|P63261|ACTG_HUMAN
U87MG_100ug_NHS_Rep1_5Frac_Frac-4_SII_12733_1_12733_3_1	2.14965	4.41421e-05	2.44742e-09	R.FHVEEEGK[UNIMOD:56]GK[UNIMOD:56]DASGNK[UNIMOD:56]VK[UNIMOD:56]AEPAK[UNIMOD:56]IEAFR.A	sp|P00558|PGK1_HUMAN
U87MG_100ug_NHS_Rep1_5Frac_Frac-1_SII_12412_1_12412_3_1	2.14924	4.41421e-05	2.45593e-09	R.[UNIMOD:28]QK[UNIMOD:56]QAADAEMEK[UNIMOD:56]HK[UNIMOD:56]K[UNIMOD:56]FAEQTLR.Q	sp|Q15149|PLEC_HUMAN
U87MG_100ug_NHS_Rep1_5Frac_Frac-3_SII_11765_1_11765_2_1	2.14921	4.41421e-05	2.45657e-09	R.EMEENFAVEAANYQDTIGR.L	sp|P08670|VIME_HUMAN
U87MG_100ug_NHS_Rep1_5Frac_Frac-5_SII_11103_1_11103_3_1	2.14906	4.41421e-05	2.45972e-09	R.FHVEEEGK[UNIMOD:56]GK[UNIMOD:56]DASGNK[UNIMOD:56]VK[UNIMOD:56]AEPAK[UNIMOD:56]IEAFR.A	sp|P00558|PGK1_HUMAN
U87MG_100ug_NHS_Rep1_5Frac_Frac-5_SII_15047_1_15047_2_1	2.14836	4.41421e-05	2.47437e-09	R.DDGLFSGDPNWFPK[UNIMOD:56]K[UNIMOD:56]SK[UNIMOD:56]ENPR.N	sp|P37802|TAGL2_HUMAN
U87MG_100ug_NHS_Rep1_5Frac_Frac-5_SII_14818_1_14818_2_1	2.14822	4.41421e-05	2.47728e-09	R.NAFAC[UNIMOD:4]FDEEATGTIQEDYLR.E	sp|O14950|ML12B_HUMAN
U87MG_100ug_NHS_Rep1_5Frac_Frac-4_SII_17310_1_17310_2_1	2.14745	4.41421e-05	2.49372e-09	R.EDLVVAPAGITLK[UNIMOD:56]EANEILQR.S	sp|P12268|IMDH2_HUMAN
U87MG_100ug_NHS_Rep1_5Frac_Frac-1_SII_5095_1_5095_2_1	2.14734	4.41421e-05	2.49608e-09	R.[UNIMOD:28][UNIMOD:56]QLAEAHAQAK[UNIMOD:56]AQAER.E	sp|Q15149|PLEC_HUMAN
U87MG_100ug_NHS_Rep1_5Frac_Frac-2_SII_16647_1_16647_3_1	2.14711	4.41421e-05	2.50091e-09	S.[UNIMOD:27]EAGTAFIQTQQLHAAMADTFLEHMC[UNIMOD:4]R.L	sp|P14618|KPYM_HUMAN
U87MG_100ug_NHS_Rep1_5Frac_Frac-3_SII_11368_1_11368_3_1	2.14707	4.41421e-05	2.50168e-09	R.FHVEEEGK[UNIMOD:56]GK[UNIMOD:56]DASGNK[UNIMOD:56]VK[UNIMOD:56]AEPAK[UNIMOD:56]IEAFR.A	sp|P00558|PGK1_HUMAN
U87MG_100ug_NHS_Rep1_5Frac_Frac-2_SII_16824_1_16824_3_1	2.14703	4.41421e-05	2.50261e-09	M.[UNIMOD:56]PATEK[UNIMOD:56]DLAEDAPWK[UNIMOD:56]K[UNIMOD:56]IQQNTFTR.W	sp|P21333|FLNA_HUMAN
U87MG_100ug_NHS_Rep1_5Frac_Frac-5_SII_15166_1_15166_3_1	2.1462	4.41421e-05	2.52032e-09	R.[UNIMOD:56]SSFYVNGLTLGGQK[UNIMOD:56]C[UNIMOD:4]SVIR.D	sp|P07737|PROF1_HUMAN
U87MG_100ug_NHS_Rep1_5Frac_Frac-2_SII_20039_1_20039_2_1	2.14561	4.41421e-05	2.53304e-09	R.[UNIMOD:56]SLHDALC[UNIMOD:4]VLAQTVK[UNIMOD:56]DSR.T	sp|P78371|TCPB_HUMAN
U87MG_100ug_NHS_Rep1_5Frac_Frac-1_SII_8619_1_8619_3_1	2.14547	4.41421e-05	2.53602e-09	R.ENPVYEK[UNIMOD:56]K[UNIMOD:56]PK[UNIMOD:56]K[UNIMOD:56]EVK[UNIMOD:56]K[UNIMOD:56]K[UNIMOD:56]R.W	sp|P46777|RL5_HUMAN
U87MG_100ug_NHS_Rep1_5Frac_Frac-5_SII_3731_1_3731_2_1	2.14393	4.41421e-05	2.56953e-09	R.[UNIMOD:56]K[UNIMOD:56]SAPATGGVK[UNIMOD:56]K[UNIMOD:56]PHR.Y	sp|Q16695|H31T_HUMAN
U87MG_100ug_NHS_Rep1_5Frac_Frac-5_SII_11647_1_11647_4_1	2.14352	4.41421e-05	2.57866e-09	-.[UNIMOD:56]PPK[UNIMOD:56]DDK[UNIMOD:56]K[UNIMOD:56]K[UNIMOD:56]K[UNIMOD:56]DAGK[UNIMOD:56]SAK[UNIMOD:56]K[UNIMOD:56]DK[UNIMOD:56]DPVNK[UNIMOD:56]SGGK[UNIMOD:56]AK[UNIMOD:56]K[UNIMOD:56]K[UNIMOD:56]K[UNIMOD:56]WSK[UNIMOD:56]GK[UNIMOD:56]VR.D	sp|P62851|RS25_HUMAN
U87MG_100ug_NHS_Rep1_5Frac_Frac-5_SII_12928_1_12928_3_1	2.14336	4.41421e-05	2.58204e-09	-.[UNIMOD:1]M[UNIMOD:35]EGVEEK[UNIMOD:56]K[UNIMOD:56]K[UNIMOD:56]EVPAVPETLK[UNIMOD:56]K[UNIMOD:56]K[UNIMOD:56]R.R	sp|P18124|RL7_HUMAN
U87MG_100ug_NHS_Rep1_5Frac_Frac-3_SII_21360_1_21360_3_1	2.14332	4.41421e-05	2.58309e-09	R.QQYESVAAK[UNIMOD:56]NLQEAEEWYK[UNIMOD:56]SK[UNIMOD:56]FADLSEAANR.N	sp|P08670|VIME_HUMAN
U87MG_100ug_NHS_Rep1_5Frac_Frac-1_SII_18287_1_18287_3_1	2.14319	4.41421e-05	2.58589e-09	R.LEDLLQDAQDEK[UNIMOD:56]EQLNEYK[UNIMOD:56]GHLSGLAK[UNIMOD:56]R.A	sp|Q15149|PLEC_HUMAN
U87MG_100ug_NHS_Rep1_5Frac_Frac-5_SII_10921_1_10921_3_1	2.14315	4.41421e-05	2.58664e-09	-.[UNIMOD:56]PDPAK[UNIMOD:56]SAPAPK[UNIMOD:56]K[UNIMOD:56]GSK[UNIMOD:56]K[UNIMOD:56]AVTK[UNIMOD:56]AQK[UNIMOD:56]K[UNIMOD:56]DGK[UNIMOD:56]K[UNIMOD:56]R.K	sp|P23527|H2B1O_HUMAN
U87MG_100ug_NHS_Rep1_5Frac_Frac-4_SII_12680_1_12680_3_1	2.14212	4.41421e-05	2.60958e-09	R.FHVEEEGK[UNIMOD:56]GK[UNIMOD:56]DASGNK[UNIMOD:56]VK[UNIMOD:56]AEPAK[UNIMOD:56]IEAFR.A	sp|P00558|PGK1_HUMAN
U87MG_100ug_NHS_Rep1_5Frac_Frac-5_SII_11452_1_11452_2_1	2.14121	4.41421e-05	2.62987e-09	R.EMEENFAVEAANYQDTIGR.L	sp|P08670|VIME_HUMAN
U87MG_100ug_NHS_Rep1_5Frac_Frac-5_SII_17039_1_17039_2_1	2.14098	4.41421e-05	2.6351e-09	R.[UNIMOD:56]SGLAAK[UNIMOD:56]HFIDVGAGVIDEDYR.G	sp|P33316|DUT_HUMAN
U87MG_100ug_NHS_Rep1_5Frac_Frac-2_SII_12944_1_12944_3_1	2.14047	4.41421e-05	2.64648e-09	-.[UNIMOD:1]M[UNIMOD:35]EGVEEK[UNIMOD:56]K[UNIMOD:56]K[UNIMOD:56]EVPAVPETLK[UNIMOD:56]K[UNIMOD:56]K[UNIMOD:56]R.R	sp|P18124|RL7_HUMAN
U87MG_100ug_NHS_Rep1_5Frac_Frac-1_SII_14773_1_14773_3_1	2.13977	4.41421e-05	2.66237e-09	S.[UNIMOD:27]EAGTAFIQTQQLHAAM[UNIMOD:35]ADTFLEHMC[UNIMOD:4]R.L	sp|P14618|KPYM_HUMAN
U87MG_100ug_NHS_Rep1_5Frac_Frac-4_SII_14386_1_14386_2_1	2.13853	4.41421e-05	2.69055e-09	-.[UNIMOD:1]DDDIAALVVDNGSGM[UNIMOD:35]C[UNIMOD:4]K[UNIMOD:56]AGFAGDDAPR.A	sp|P60709|ACTB_HUMAN
U87MG_100ug_NHS_Rep1_5Frac_Frac-4_SII_8773_1_8773_4_1	2.13663	4.41421e-05	2.7345e-09	R.[UNIMOD:1]HQGVM[UNIMOD:35]VGMGQK[UNIMOD:56]DSYVGDEAQSK[UNIMOD:56]R.G	sp|P60709|ACTB_HUMAN
U87MG_100ug_NHS_Rep1_5Frac_Frac-4_SII_14716_1_14716_2_1	2.13631	4.41421e-05	2.7421e-09	R.[UNIMOD:56]QLFHPEQLITGK[UNIMOD:56]EDAANNYAR.G	sp|P68363|TBA1B_HUMAN
U87MG_100ug_NHS_Rep1_5Frac_Frac-3_SII_14730_1_14730_2_1	2.13573	4.41421e-05	2.75567e-09	R.[UNIMOD:28]QLFHPEQLITGK[UNIMOD:56]EDAANNYAR.G	sp|P68363|TBA1B_HUMAN
U87MG_100ug_NHS_Rep1_5Frac_Frac-3_SII_20816_1_20816_3_1	2.13567	4.41421e-05	2.75695e-09	R.[UNIMOD:56]TLK[UNIMOD:56]LTTPTYGDLNHLVSATMSGVTTC[UNIMOD:4]LR.F	sp|P07437|TBB5_HUMAN
U87MG_100ug_NHS_Rep1_5Frac_Frac-2_SII_12087_1_12087_3_1	2.13447	4.41421e-05	2.78537e-09	R.VHLLNAHGLDEAGIDGGGIFR.E	sp|Q15386|UBE3C_HUMAN
U87MG_100ug_NHS_Rep1_5Frac_Frac-4_SII_14528_1_14528_3_1	2.13421	4.41421e-05	2.79158e-09	R.FHVEEEGK[UNIMOD:56]GK[UNIMOD:56]DASGNK[UNIMOD:56]VK[UNIMOD:56]AEPAK[UNIMOD:56]IEAFR.A	sp|P00558|PGK1_HUMAN
U87MG_100ug_NHS_Rep1_5Frac_Frac-5_SII_18079_1_18079_3_1	2.13284	4.41421e-05	2.82425e-09	-.[UNIMOD:1]MFHGIPATPGIGAPGNK[UNIMOD:56]PELYEEVK[UNIMOD:56]LYK[UNIMOD:56]NAR.E	sp|Q9UK41|VPS28_HUMAN
U87MG_100ug_NHS_Rep1_5Frac_Frac-2_SII_21780_1_21780_3_1	2.13236	4.41421e-05	2.83586e-09	-.[UNIMOD:56]PTTQQSPQDEQEK[UNIMOD:56]LLDEAIQAVK[UNIMOD:56]VQSFQMK[UNIMOD:56]R.C	sp|Q96QK1|VPS35_HUMAN
U87MG_100ug_NHS_Rep1_5Frac_Frac-2_SII_14823_1_14823_3_1	2.13226	4.41421e-05	2.83839e-09	-.[UNIMOD:1]AAAAASAPQQLSDEELFSQLR.R	sp|Q9Y2U8|MAN1_HUMAN
U87MG_100ug_NHS_Rep1_5Frac_Frac-1_SII_14292_1_14292_3_1	2.13209	4.41421e-05	2.84235e-09	R.K[UNIMOD:56]VLGEK[UNIMOD:56]GK[UNIMOD:56]NIK[UNIMOD:56]IISK[UNIMOD:56]IENHEGVR.R	sp|P14618|KPYM_HUMAN
U87MG_100ug_NHS_Rep1_5Frac_Frac-3_SII_9091_1_9091_3_1	2.13186	4.41421e-05	2.84806e-09	-.[UNIMOD:56]PEPAK[UNIMOD:56]SAPAPK[UNIMOD:56]K[UNIMOD:56]GSK[UNIMOD:56]K[UNIMOD:56]AVTK[UNIMOD:56]AQK[UNIMOD:56]K[UNIMOD:56]DGK[UNIMOD:56]K[UNIMOD:56]R.K	sp|P62807|H2B1C_HUMAN
U87MG_100ug_NHS_Rep1_5Frac_Frac-4_SII_14569_1_14569_2_1	2.13135	4.41421e-05	2.86043e-09	R.[UNIMOD:28]QLFHPEQLITGK[UNIMOD:56]EDAANNYAR.G	sp|P68363|TBA1B_HUMAN
U87MG_100ug_NHS_Rep1_5Frac_Frac-2_SII_12093_1_12093_3_1	2.13058	4.41421e-05	2.87934e-09	R.MVNDAEK[UNIMOD:56]FAEEDK[UNIMOD:56]K[UNIMOD:56]LK[UNIMOD:56]ER.I	sp|P11021|BIP_HUMAN
U87MG_100ug_NHS_Rep1_5Frac_Frac-5_SII_17802_1_17802_3_1	2.12959	4.41421e-05	2.9036e-09	-.[UNIMOD:56]M[UNIMOD:35]K[UNIMOD:56]PLVVFVLGGPGAGK[UNIMOD:56]GTQC[UNIMOD:4]AR.I	sp|P30085|KCY_HUMAN
U87MG_100ug_NHS_Rep1_5Frac_Frac-4_SII_13570_1_13570_3_1	2.12856	4.41421e-05	2.92927e-09	R.FHVEEEGK[UNIMOD:56]GK[UNIMOD:56]DASGNK[UNIMOD:56]VK[UNIMOD:56]AEPAK[UNIMOD:56]IEAFR.A	sp|P00558|PGK1_HUMAN
U87MG_100ug_NHS_Rep1_5Frac_Frac-4_SII_13820_1_13820_2_1	2.12823	4.41421e-05	2.93739e-09	Q.[UNIMOD:27]EQHVQIDVDVSK[UNIMOD:56]PDLTAALR.D	sp|P08670|VIME_HUMAN
U87MG_100ug_NHS_Rep1_5Frac_Frac-2_SII_14215_1_14215_3_1	2.12799	4.41421e-05	2.94341e-09	R.[UNIMOD:28]QAQQERDELADEIANSSGK[UNIMOD:56]GALALEEK[UNIMOD:56]R.R	sp|P35579|MYH9_HUMAN
U87MG_100ug_NHS_Rep1_5Frac_Frac-3_SII_16219_1_16219_3_1	2.12791	4.41421e-05	2.94544e-09	-.[UNIMOD:1]MDLSGVK[UNIMOD:56]K[UNIMOD:56]K[UNIMOD:56]SLLGVK[UNIMOD:56]ENNK[UNIMOD:56]K[UNIMOD:56]SSTR.A	sp|Q15287|RNPS1_HUMAN
U87MG_100ug_NHS_Rep1_5Frac_Frac-2_SII_9236_1_9236_2_1	2.12769	4.41421e-05	2.95109e-09	R.[UNIMOD:56]YHTSQSGDEMTSLSEYVSR.M	sp|P08238|HS90B_HUMAN
U87MG_100ug_NHS_Rep1_5Frac_Frac-1_SII_10235_1_10235_3_1	2.1264	4.41421e-05	2.98359e-09	R.[UNIMOD:56]ENPVYEK[UNIMOD:56]K[UNIMOD:56]PK[UNIMOD:56]K[UNIMOD:56]EVK[UNIMOD:56]K[UNIMOD:56]K[UNIMOD:56]R.W	sp|P46777|RL5_HUMAN
U87MG_100ug_NHS_Rep1_5Frac_Frac-5_SII_18114_1_18114_3_1	2.12594	4.41421e-05	2.99528e-09	Q.[UNIMOD:27]EIQLK[UNIMOD:56]EAK[UNIMOD:56]HIAEEADRK[UNIMOD:56]YEEVAR.K	sp|P06753|TPM3_HUMAN
U87MG_100ug_NHS_Rep1_5Frac_Frac-2_SII_17383_1_17383_3_1	2.12592	4.41421e-05	2.99576e-09	N.[UNIMOD:27]EELTVK[UNIMOD:56]IK[UNIMOD:56]C[UNIMOD:4]DK[UNIMOD:56]EK[UNIMOD:56]NLLHVTDTGVGMTR.E	sp|P14625|ENPL_HUMAN
U87MG_100ug_NHS_Rep1_5Frac_Frac-4_SII_14259_1_14259_2_1	2.12541	4.41421e-05	3.00897e-09	R.K[UNIMOD:56]GTDVNVFNTILTTR.S	sp|P04083|ANXA1_HUMAN
U87MG_100ug_NHS_Rep1_5Frac_Frac-4_SII_22706_1_22706_3_1	2.12498	4.41421e-05	3.01997e-09	R.[UNIMOD:56]GLK[UNIMOD:56]MASTFIGNSTAIQELFK[UNIMOD:56]R.I	sp|Q9BUF5|TBB6_HUMAN
U87MG_100ug_NHS_Rep1_5Frac_Frac-5_SII_18971_1_18971_2_1	2.12369	4.41421e-05	3.0534e-09	R.NDFQLIGIQDGYLSLLQDSGEVR.E	sp|P63241|IF5A1_HUMAN
U87MG_100ug_NHS_Rep1_5Frac_Frac-3_SII_19426_1_19426_3_1	2.12328	4.41421e-05	3.06408e-09	R.[UNIMOD:56]GSYGDLGGPIITTQVTIPK[UNIMOD:56]DLAGSIIGK[UNIMOD:56]GGQR.I	sp|P61978|HNRPK_HUMAN
U87MG_100ug_NHS_Rep1_5Frac_Frac-2_SII_14677_1_14677_3_1	2.12291	4.41421e-05	3.07362e-09	R.EALEK[UNIMOD:56]TEK[UNIMOD:56]QLEAIDQLHLEYAK[UNIMOD:56]R.A	sp|O43707|ACTN4_HUMAN
U87MG_100ug_NHS_Rep1_5Frac_Frac-1_SII_1870_1_1870_2_1	2.12291	4.41421e-05	3.07386e-09	R.DAQDVQASQAEADQQQTR.L	sp|Q9P2E9|RRBP1_HUMAN
U87MG_100ug_NHS_Rep1_5Frac_Frac-3_SII_22124_1_22124_3_1	2.12173	4.41421e-05	3.1047e-09	R.[UNIMOD:56]GLK[UNIMOD:56]MSATFIGNSTAIQELFK[UNIMOD:56]R.I	sp|P68371|TBB4B_HUMAN
U87MG_100ug_NHS_Rep1_5Frac_Frac-2_SII_20013_1_20013_3_1	2.12079	4.41421e-05	3.12987e-09	R.DHSGTLGPEEFK[UNIMOD:56]AC[UNIMOD:4]LISLGYDIGNDPQGEAEFAR.I	sp|P12814|ACTN1_HUMAN
U87MG_100ug_NHS_Rep1_5Frac_Frac-2_SII_8796_1_8796_2_1	2.12076	4.41421e-05	3.13051e-09	R.[UNIMOD:28]QGK[UNIMOD:56]LEAAHTLEDC[UNIMOD:4]ASR.N	sp|Q9H0B6|KLC2_HUMAN
U87MG_100ug_NHS_Rep1_5Frac_Frac-4_SII_14687_1_14687_3_1	2.1202	4.41421e-05	3.1456e-09	R.FHVEEEGK[UNIMOD:56]GK[UNIMOD:56]DASGNK[UNIMOD:56]VK[UNIMOD:56]AEPAK[UNIMOD:56]IEAFR.A	sp|P00558|PGK1_HUMAN
U87MG_100ug_NHS_Rep1_5Frac_Frac-4_SII_22709_1_22709_3_1	2.12013	4.41421e-05	3.14744e-09	R.DALNIETAIK[UNIMOD:56]TK[UNIMOD:56]GVDEVTIVNILTNR.S	sp|P07355|ANXA2_HUMAN
U87MG_100ug_NHS_Rep1_5Frac_Frac-5_SII_11908_1_11908_2_1	2.12013	4.41421e-05	3.14746e-09	R.[UNIMOD:56]SHPFIK[UNIMOD:56]EYQAK[UNIMOD:56]ENDFDR.L	sp|O14579|COPE_HUMAN
U87MG_100ug_NHS_Rep1_5Frac_Frac-1_SII_15865_1_15865_4_1	2.11924	4.41421e-05	3.17133e-09	-.[UNIMOD:1]SK[UNIMOD:56]PHSEAGTAFIQTQQLHAAMADTFLEHMC[UNIMOD:4]R.L	sp|P14618|KPYM_HUMAN
U87MG_100ug_NHS_Rep1_5Frac_Frac-5_SII_21798_1_21798_3_1	2.11822	4.41421e-05	3.19902e-09	R.DFVAEPMGEK[UNIMOD:56]PVGSLAGIGEVLGK[UNIMOD:56]K[UNIMOD:56]LEER.G	sp|O75531|BAF_HUMAN
U87MG_100ug_NHS_Rep1_5Frac_Frac-1_SII_13105_1_13105_3_1	2.11821	4.41421e-05	3.19938e-09	R.[UNIMOD:56]GQHVPGSPFQFTVGPLGEGGAHK[UNIMOD:56]VR.A	sp|P21333|FLNA_HUMAN
U87MG_100ug_NHS_Rep1_5Frac_Frac-5_SII_21223_1_21223_3_1	2.11804	4.41421e-05	3.20412e-09	-.[UNIMOD:1]C[UNIMOD:4]DFTEDQTAEFK[UNIMOD:56]EAFQLFDR.T	sp|P60660|MYL6_HUMAN
U87MG_100ug_NHS_Rep1_5Frac_Frac-1_SII_5497_1_5497_2_1	2.11775	4.41421e-05	3.21186e-09	R.LK[UNIMOD:56]SEDGVEGDLGETQSR.T	sp|Q09666|AHNK_HUMAN
U87MG_100ug_NHS_Rep1_5Frac_Frac-1_SII_17712_1_17712_3_1	2.11751	4.41421e-05	3.21858e-09	-.[UNIMOD:56]PVTEK[UNIMOD:56]DLAEDAPWK[UNIMOD:56]K[UNIMOD:56]IQQNTFTR.W	sp|O75369|FLNB_HUMAN
U87MG_100ug_NHS_Rep1_5Frac_Frac-5_SII_21845_1_21845_2_1	2.11707	4.41421e-05	3.23061e-09	-.[UNIMOD:56]MK[UNIMOD:56]PLVVFVLGGPGAGK[UNIMOD:56]GTQC[UNIMOD:4]AR.I	sp|P30085|KCY_HUMAN
U87MG_100ug_NHS_Rep1_5Frac_Frac-3_SII_10903_1_10903_3_1	2.11648	4.41421e-05	3.24699e-09	K.[UNIMOD:27]EIGGDVQK[UNIMOD:56]HAEMVHTGLK[UNIMOD:56]LER.A	sp|Q01518|CAP1_HUMAN
U87MG_100ug_NHS_Rep1_5Frac_Frac-5_SII_24533_1_24533_3_1	2.11564	4.41421e-05	3.27019e-09	-.[UNIMOD:1]ASGVAVSDGVIK[UNIMOD:56]VFNDMK[UNIMOD:56]VR.K	sp|P23528|COF1_HUMAN
U87MG_100ug_NHS_Rep1_5Frac_Frac-5_SII_22938_1_22938_3_1	2.11545	4.41421e-05	3.27549e-09	-.[UNIMOD:1]SESLVVC[UNIMOD:4]DVAEDLVEK[UNIMOD:56]LR.K	sp|P60983|GMFB_HUMAN
U87MG_100ug_NHS_Rep1_5Frac_Frac-5_SII_21848_1_21848_3_1	2.1152	4.41421e-05	3.28253e-09	-.[UNIMOD:1]ASGVAVSDGVIK[UNIMOD:56]VFNDMK[UNIMOD:56]VR.K	sp|P23528|COF1_HUMAN
U87MG_100ug_NHS_Rep1_5Frac_Frac-3_SII_22858_1_22858_3_1	2.11365	4.41421e-05	3.32611e-09	R.[UNIMOD:27]EVAAFAQFGSDLDAATQQLLSR.G	sp|P25705|ATPA_HUMAN
U87MG_100ug_NHS_Rep1_5Frac_Frac-5_SII_8959_1_8959_2_1	2.11365	4.41421e-05	3.32618e-09	-.[UNIMOD:1]MM[UNIMOD:35]C[UNIMOD:4]GAPSATQPATAETQHIADQVR.S	sp|P04080|CYTB_HUMAN
U87MG_100ug_NHS_Rep1_5Frac_Frac-3_SII_15500_1_15500_3_1	2.1131	4.41421e-05	3.3417e-09	R.VDSTAK[UNIMOD:56]VAEIEHAEK[UNIMOD:56]EK[UNIMOD:56]MK[UNIMOD:56]EK[UNIMOD:56]VER.I	sp|P78371|TCPB_HUMAN
U87MG_100ug_NHS_Rep1_5Frac_Frac-1_SII_13874_1_13874_3_1	2.11179	4.41421e-05	3.37919e-09	R.TEK[UNIMOD:56]K[UNIMOD:56]LK[UNIMOD:56]DVLLQVDDERR.N	sp|P35579|MYH9_HUMAN
U87MG_100ug_NHS_Rep1_5Frac_Frac-4_SII_13078_1_13078_3_1	2.11017	4.41421e-05	3.42629e-09	R.FHVEEEGK[UNIMOD:56]GK[UNIMOD:56]DASGNK[UNIMOD:56]VK[UNIMOD:56]AEPAK[UNIMOD:56]IEAFR.A	sp|P00558|PGK1_HUMAN
U87MG_100ug_NHS_Rep1_5Frac_Frac-4_SII_22026_1_22026_3_1	2.10998	4.41421e-05	3.43174e-09	-.[UNIMOD:1]DDDIAALVVDNGSGMC[UNIMOD:4]K[UNIMOD:56]AGFAGDDAPR.A	sp|P60709|ACTB_HUMAN
U87MG_100ug_NHS_Rep1_5Frac_Frac-1_SII_10599_1_10599_3_1	2.10969	4.41421e-05	3.44029e-09	-.[UNIMOD:1]SLK[UNIMOD:56]LQASNVTNK[UNIMOD:56]NDPK[UNIMOD:56]SINSR.V	sp|Q9UKM9|RALY_HUMAN
U87MG_100ug_NHS_Rep1_5Frac_Frac-2_SII_20798_1_20798_3_1	2.10967	4.41421e-05	3.44088e-09	-.[UNIMOD:1]MFAK[UNIMOD:56]LK[UNIMOD:56]K[UNIMOD:56]K[UNIMOD:56]IAEETAVAQRPGGATR.I	sp|Q92805|GOGA1_HUMAN
U87MG_100ug_NHS_Rep1_5Frac_Frac-3_SII_15339_1_15339_2_1	2.10921	4.41421e-05	3.45445e-09	R.GDVVPK[UNIMOD:56]DVNAAIATIK[UNIMOD:56]TK[UNIMOD:56]R.T	sp|P68363|TBA1B_HUMAN
U87MG_100ug_NHS_Rep1_5Frac_Frac-2_SII_11357_1_11357_2_1	2.10859	4.41421e-05	3.47263e-09	R.EMEENFAVEAANYQDTIGR.L	sp|P08670|VIME_HUMAN
U87MG_100ug_NHS_Rep1_5Frac_Frac-3_SII_11805_1_11805_2_1	2.10796	4.41421e-05	3.49155e-09	R.EMEENFAVEAANYQDTIGR.L	sp|P08670|VIME_HUMAN
U87MG_100ug_NHS_Rep1_5Frac_Frac-2_SII_15194_1_15194_3_1	2.10781	4.41421e-05	3.49594e-09	R.[UNIMOD:56]GTK[UNIMOD:56]VILHLK[UNIMOD:56]EDQTEYLEERR.V	sp|P07900|HS90A_HUMAN
U87MG_100ug_NHS_Rep1_5Frac_Frac-3_SII_14949_1_14949_3_1	2.10725	4.41421e-05	3.51258e-09	-.[UNIMOD:56]VK[UNIMOD:56]IVTVK[UNIMOD:56]TQAYQDQK[UNIMOD:56]PGTSGLR.K	sp|P36871|PGM1_HUMAN
U87MG_100ug_NHS_Rep1_5Frac_Frac-2_SII_15133_1_15133_3_1	2.10674	4.41421e-05	3.52798e-09	R.NQDGK[UNIMOD:56]ITVDELK[UNIMOD:56]LK[UNIMOD:56]SDEDEERVHEEL.-	sp|Q96AY3|FKB10_HUMAN
U87MG_100ug_NHS_Rep1_5Frac_Frac-1_SII_18750_1_18750_3_1	2.10505	4.41421e-05	3.57904e-09	Q.[UNIMOD:27]EVNILK[UNIMOD:56]K[UNIMOD:56]TLEEEAK[UNIMOD:56]THEAQIQEMR.Q	sp|P35579|MYH9_HUMAN
U87MG_100ug_NHS_Rep1_5Frac_Frac-5_SII_18066_1_18066_4_1	2.10465	4.41421e-05	3.59145e-09	R.EHEK[UNIMOD:56]EVLQK[UNIMOD:56]AIEENNNFSK[UNIMOD:56]M[UNIMOD:35]AEEK[UNIMOD:56]LTHK[UNIMOD:56]MEANK[UNIMOD:56]ENR.E	sp|P16949|STMN1_HUMAN
U87MG_100ug_NHS_Rep1_5Frac_Frac-1_SII_18848_1_18848_3_1	2.10425	4.41421e-05	3.60359e-09	R.[UNIMOD:28]QK[UNIMOD:56]LSLSTK[UNIMOD:56]LK[UNIMOD:56]QVEDEK[UNIMOD:56]NSFR.E	sp|P35579|MYH9_HUMAN
U87MG_100ug_NHS_Rep1_5Frac_Frac-4_SII_13611_1_13611_3_1	2.10319	4.41421e-05	3.63623e-09	R.FHVEEEGK[UNIMOD:56]GK[UNIMOD:56]DASGNK[UNIMOD:56]VK[UNIMOD:56]AEPAK[UNIMOD:56]IEAFR.A	sp|P00558|PGK1_HUMAN
U87MG_100ug_NHS_Rep1_5Frac_Frac-4_SII_15380_1_15380_3_1	2.10316	4.41421e-05	3.63733e-09	-.[UNIMOD:1]DDDIAALVVDNGSGMC[UNIMOD:4]K[UNIMOD:56]AGFAGDDAPR.A	sp|P60709|ACTB_HUMAN
U87MG_100ug_NHS_Rep1_5Frac_Frac-4_SII_12549_1_12549_3_1	2.10258	4.41421e-05	3.65522e-09	R.QHIVNDMNPGNLHLFINAYNSR.R	sp|Q92597|NDRG1_HUMAN
U87MG_100ug_NHS_Rep1_5Frac_Frac-1_SII_15163_1_15163_2_1	2.10234	4.41421e-05	3.66275e-09	R.AEEYEFLTPVEEAPK[UNIMOD:56]GMLAR.G	sp|P52565|GDIR1_HUMAN
U87MG_100ug_NHS_Rep1_5Frac_Frac-1_SII_12328_1_12328_2_1	2.10198	4.41421e-05	3.67388e-09	R.PFPDGLAEDIDK[UNIMOD:56]GEVSAR.Q	sp|P13639|EF2_HUMAN
U87MG_100ug_NHS_Rep1_5Frac_Frac-4_SII_11310_1_11310_2_1	2.10092	4.41421e-05	3.7072e-09	R.EMEENFAVEAANYQDTIGR.L	sp|P08670|VIME_HUMAN
U87MG_100ug_NHS_Rep1_5Frac_Frac-5_SII_19656_1_19656_3_1	2.10061	4.41421e-05	3.71726e-09	R.SGVSLAALK[UNIMOD:56]K[UNIMOD:56]ALAAAGYDVEK[UNIMOD:56]NNSR.I	sp|P16403|H12_HUMAN
U87MG_100ug_NHS_Rep1_5Frac_Frac-5_SII_19925_1_19925_4_1	2.09998	4.41421e-05	3.73697e-09	R.[UNIMOD:27]EHEK[UNIMOD:56]EVLQK[UNIMOD:56]AIEENNNFSK[UNIMOD:56]MAEEK[UNIMOD:56]LTHK[UNIMOD:56]MEANK[UNIMOD:56]ENR.E	sp|P16949|STMN1_HUMAN
U87MG_100ug_NHS_Rep1_5Frac_Frac-2_SII_16245_1_16245_3_1	2.09949	4.41421e-05	3.75277e-09	R.[UNIMOD:56]MAQEVLTHLK[UNIMOD:56]EHPDAWTR.V	sp|O14980|XPO1_HUMAN
U87MG_100ug_NHS_Rep1_5Frac_Frac-2_SII_21772_1_21772_3_1	2.09924	4.41421e-05	3.76062e-09	R.[UNIMOD:56]SQAASILTK[UNIMOD:56]FQELK[UNIMOD:56]DVQDELR.I	sp|O95347|SMC2_HUMAN
U87MG_100ug_NHS_Rep1_5Frac_Frac-1_SII_12838_1_12838_2_1	2.09895	4.41421e-05	3.77013e-09	R.TK[UNIMOD:56]K[UNIMOD:56]NK[UNIMOD:56]EEAAEYAK[UNIMOD:56]LLAK[UNIMOD:56]R.M	sp|P62753|RS6_HUMAN
U87MG_100ug_NHS_Rep1_5Frac_Frac-2_SII_20022_1_20022_3_1	2.09811	4.41421e-05	3.79708e-09	R.DHSGTLGPEEFK[UNIMOD:56]AC[UNIMOD:4]LISLGYDIGNDPQGEAEFAR.I	sp|P12814|ACTN1_HUMAN
U87MG_100ug_NHS_Rep1_5Frac_Frac-5_SII_22806_1_22806_3_1	2.09785	4.41421e-05	3.80551e-09	-.[UNIMOD:1]ASGVAVSDGVIK[UNIMOD:56]VFNDMK[UNIMOD:56]VR.K	sp|P23528|COF1_HUMAN
U87MG_100ug_NHS_Rep1_5Frac_Frac-3_SII_14363_1_14363_3_1	2.09752	4.41421e-05	3.81628e-09	R.LEDK[UNIMOD:56]C[UNIMOD:4]LELVEHFGPNELR.K	sp|Q969Z0|FAKD4_HUMAN
U87MG_100ug_NHS_Rep1_5Frac_Frac-2_SII_9807_1_9807_2_1	2.09672	4.41421e-05	3.84249e-09	R.QTNPSAMEVEEDDPVPEIR.R	sp|P55072|TERA_HUMAN
U87MG_100ug_NHS_Rep1_5Frac_Frac-1_SII_18966_1_18966_3_1	2.09651	4.41421e-05	3.84939e-09	R.[UNIMOD:27]EQEVNILK[UNIMOD:56]K[UNIMOD:56]TLEEEAK[UNIMOD:56]THEAQIQEMR.Q	sp|P35579|MYH9_HUMAN
U87MG_100ug_NHS_Rep1_5Frac_Frac-5_SII_8518_1_8518_3_1	2.09607	4.41421e-05	3.86363e-09	-.[UNIMOD:1]PEPSK[UNIMOD:56]SAPAPK[UNIMOD:56]K[UNIMOD:56]GSK[UNIMOD:56]K[UNIMOD:56]AITK[UNIMOD:56]AQK[UNIMOD:56]K[UNIMOD:56]DGK[UNIMOD:56]K[UNIMOD:56]R.K	sp|P33778|H2B1B_HUMAN
U87MG_100ug_NHS_Rep1_5Frac_Frac-1_SII_19551_1_19551_3_1	2.09604	4.41421e-05	3.8649e-09	R.[UNIMOD:56]STGEAFVQFASQEIAEK[UNIMOD:56]ALK[UNIMOD:56]K[UNIMOD:56]HK[UNIMOD:56]ER.I	sp|P55795|HNRH2_HUMAN
U87MG_100ug_NHS_Rep1_5Frac_Frac-3_SII_2713_1_2713_3_1	2.09574	4.41421e-05	3.87468e-09	R.SHEVK[UNIMOD:56]AEGYEVAHGGR.C	sp|P53041|PPP5_HUMAN
U87MG_100ug_NHS_Rep1_5Frac_Frac-4_SII_22634_1_22634_3_1	2.09539	4.41421e-05	3.88605e-09	R.SNTPILVDGK[UNIMOD:56]DVMPEVNK[UNIMOD:56]VLDK[UNIMOD:56]MK[UNIMOD:56]SFC[UNIMOD:4]QR.V	sp|P06744|G6PI_HUMAN
U87MG_100ug_NHS_Rep1_5Frac_Frac-1_SII_15141_1_15141_4_1	2.09509	4.41421e-05	3.89633e-09	R.TEMEDLMSSK[UNIMOD:56]DDVGK[UNIMOD:56]SVHELEK[UNIMOD:56]SK[UNIMOD:56]R.A	sp|P35579|MYH9_HUMAN
U87MG_100ug_NHS_Rep1_5Frac_Frac-1_SII_22256_1_22256_3_1	2.09497	4.41421e-05	3.90016e-09	R.TNISDEESEQATEMLVHNAQNLMQSVK[UNIMOD:56]ETVR.E	sp|P18206|VINC_HUMAN
U87MG_100ug_NHS_Rep1_5Frac_Frac-3_SII_14561_1_14561_2_1	2.09296	4.41421e-05	3.9675e-09	R.IEIESFYEGEDFSETLTR.A	sp|P11021|BIP_HUMAN
U87MG_100ug_NHS_Rep1_5Frac_Frac-1_SII_15741_1_15741_3_1	2.09294	4.41421e-05	3.96836e-09	R.YSVDIPLDK[UNIMOD:56]TVVNK[UNIMOD:56]DVFRDPALK[UNIMOD:56]R.K	sp|P61353|RL27_HUMAN
U87MG_100ug_NHS_Rep1_5Frac_Frac-1_SII_14712_1_14712_3_1	2.09283	4.41421e-05	3.97188e-09	S.[UNIMOD:27]EAGTAFIQTQQLHAAM[UNIMOD:35]ADTFLEHMC[UNIMOD:4]R.L	sp|P14618|KPYM_HUMAN
U87MG_100ug_NHS_Rep1_5Frac_Frac-3_SII_4201_1_4201_3_1	2.09211	4.41421e-05	3.99629e-09	R.NEC[UNIMOD:4]NQC[UNIMOD:4]K[UNIMOD:56]APK[UNIMOD:56]PDGPGGGPGGSHMGGNYGDDR.R	sp|P35637|FUS_HUMAN
U87MG_100ug_NHS_Rep1_5Frac_Frac-4_SII_14893_1_14893_3_1	2.09187	4.41421e-05	4.0046e-09	R.FHVEEEGK[UNIMOD:56]GK[UNIMOD:56]DASGNK[UNIMOD:56]VK[UNIMOD:56]AEPAK[UNIMOD:56]IEAFR.A	sp|P00558|PGK1_HUMAN
U87MG_100ug_NHS_Rep1_5Frac_Frac-2_SII_17659_1_17659_2_1	2.09153	4.41421e-05	4.01626e-09	R.[UNIMOD:56]IFHELTQTDK[UNIMOD:56]ALFNR.L	sp|P11586|C1TC_HUMAN
U87MG_100ug_NHS_Rep1_5Frac_Frac-3_SII_14092_1_14092_3_1	2.09109	4.41421e-05	4.03141e-09	-.[UNIMOD:1]AAVQAAEVK[UNIMOD:56]VDGSEPK[UNIMOD:56]LSK[UNIMOD:56]NELK[UNIMOD:56]R.R	sp|Q15046|SYK_HUMAN
U87MG_100ug_NHS_Rep1_5Frac_Frac-5_SII_18947_1_18947_2_1	2.09071	4.41421e-05	4.04449e-09	S.[UNIMOD:56]LHTDGDK[UNIMOD:56]AFVDFLSDEIK[UNIMOD:56]EER.K	sp|Q07021|C1QBP_HUMAN
U87MG_100ug_NHS_Rep1_5Frac_Frac-5_SII_18791_1_18791_3_1	2.09045	4.41421e-05	4.05322e-09	-.[UNIMOD:1]AGVLK[UNIMOD:56]K[UNIMOD:56]TTGLVGLAVC[UNIMOD:4]NTPHER.L	sp|Q16718|NDUA5_HUMAN
U87MG_100ug_NHS_Rep1_5Frac_Frac-2_SII_21744_1_21744_3_1	2.09037	4.41421e-05	4.05622e-09	R.[UNIMOD:28][UNIMOD:56]QK[UNIMOD:56]DYETATLSEIK[UNIMOD:56]ALLK[UNIMOD:56]K[UNIMOD:56]HEAFESDLAAHQDR.V	sp|P12814|ACTN1_HUMAN
U87MG_100ug_NHS_Rep1_5Frac_Frac-3_SII_16194_1_16194_4_1	2.09032	4.41421e-05	4.05788e-09	-.MSK[UNIMOD:56]PHSEAGTAFIQTQQLHAAMADTFLEHMC[UNIMOD:4]R.L	sp|P14618|KPYM_HUMAN
U87MG_100ug_NHS_Rep1_5Frac_Frac-2_SII_6869_1_6869_2_1	2.09016	4.41421e-05	4.06344e-09	R.K[UNIMOD:56]GEFETGFEK[UNIMOD:56]GGQTR.E	sp|P15170|ERF3A_HUMAN
U87MG_100ug_NHS_Rep1_5Frac_Frac-3_SII_19298_1_19298_2_1	2.08979	4.41421e-05	4.07623e-09	R.NK[UNIMOD:56]NPAPPIDAVEQILPTLVR.L	sp|P52292|IMA1_HUMAN
U87MG_100ug_NHS_Rep1_5Frac_Frac-3_SII_16441_1_16441_4_1	2.08967	4.41421e-05	4.0802e-09	-.[UNIMOD:1]SK[UNIMOD:56]PHSEAGTAFIQTQQLHAAMADTFLEHMC[UNIMOD:4]R.L	sp|P14618|KPYM_HUMAN
U87MG_100ug_NHS_Rep1_5Frac_Frac-5_SII_18385_1_18385_3_1	2.08887	4.41421e-05	4.10836e-09	R.[UNIMOD:56]K[UNIMOD:56]FK[UNIMOD:56]LITEDVQGK[UNIMOD:56]NC[UNIMOD:4]LTNFHGMDLTR.D	sp|P61247|RS3A_HUMAN
U87MG_100ug_NHS_Rep1_5Frac_Frac-5_SII_15670_1_15670_2_1	2.08832	4.41421e-05	4.12743e-09	-.[UNIMOD:1]ASGVAVSDGVIK[UNIMOD:56]VFNDM[UNIMOD:35]K[UNIMOD:56]VR.K	sp|P23528|COF1_HUMAN
U87MG_100ug_NHS_Rep1_5Frac_Frac-5_SII_15560_1_15560_3_1	2.08815	4.41421e-05	4.13363e-09	R.[UNIMOD:28]QK[UNIMOD:56]DVK[UNIMOD:56]DGK[UNIMOD:56]YSQVLANGLDNK[UNIMOD:56]LR.E	sp|P62269|RS18_HUMAN
U87MG_100ug_NHS_Rep1_5Frac_Frac-4_SII_14745_1_14745_2_1	2.08808	4.41421e-05	4.13589e-09	R.[UNIMOD:56]K[UNIMOD:56]DLYANTVLSGGTTMYPGIADR.M	sp|P60709|ACTB_HUMAN
U87MG_100ug_NHS_Rep1_5Frac_Frac-4_SII_16532_1_16532_2_1	2.08699	4.41421e-05	4.17466e-09	-.[UNIMOD:1]DDDIAALVVDNGSGMC[UNIMOD:4]K[UNIMOD:56]AGFAGDDAPR.A	sp|P60709|ACTB_HUMAN
U87MG_100ug_NHS_Rep1_5Frac_Frac-2_SII_10107_1_10107_2_1	2.08549	4.41421e-05	4.2285e-09	R.LGIEK[UNIMOD:56]TDPTTLTDEEINR.F	sp|P11586|C1TC_HUMAN
U87MG_100ug_NHS_Rep1_5Frac_Frac-1_SII_12886_1_12886_3_1	2.08524	4.41421e-05	4.2375e-09	R.QAQQERDELADEIANSSGK[UNIMOD:56]GALALEEK[UNIMOD:56]R.R	sp|P35579|MYH9_HUMAN
U87MG_100ug_NHS_Rep1_5Frac_Frac-4_SII_17719_1_17719_3_1	2.08447	4.41421e-05	4.26514e-09	Q.[UNIMOD:27]EMQLK[UNIMOD:56]EAK[UNIMOD:56]HIAEEADRK[UNIMOD:56]YEEVAR.K	sp|P67936|TPM4_HUMAN
U87MG_100ug_NHS_Rep1_5Frac_Frac-2_SII_15144_1_15144_3_1	2.08394	4.41421e-05	4.28467e-09	R.NQDGK[UNIMOD:56]ITVDELK[UNIMOD:56]LK[UNIMOD:56]SDEDEERVHEEL.-	sp|Q96AY3|FKB10_HUMAN
U87MG_100ug_NHS_Rep1_5Frac_Frac-1_SII_18790_1_18790_3_1	2.0839	4.41421e-05	4.28604e-09	R.NTDQASMPDNTAAQK[UNIMOD:56]VSHLLGINVTDFTR.G	sp|P35579|MYH9_HUMAN
U87MG_100ug_NHS_Rep1_5Frac_Frac-3_SII_11777_1_11777_2_1	2.08365	4.41421e-05	4.29503e-09	R.EMEENFAVEAANYQDTIGR.L	sp|P08670|VIME_HUMAN
U87MG_100ug_NHS_Rep1_5Frac_Frac-5_SII_17072_1_17072_3_1	2.08325	4.41421e-05	4.30977e-09	-.[UNIMOD:1]SIGVPIK[UNIMOD:56]VLHEAEGHIVTC[UNIMOD:4]ETNTGEVYR.G	sp|P62318|SMD3_HUMAN
U87MG_100ug_NHS_Rep1_5Frac_Frac-4_SII_4412_1_4412_2_1	2.08303	4.41421e-05	4.31796e-09	D.PAAAPAEAEEQAVEAR.Q	sp|P84157|MXRA7_HUMAN
U87MG_100ug_NHS_Rep1_5Frac_Frac-5_SII_16530_1_16530_2_1	2.08283	4.41421e-05	4.32542e-09	-.[UNIMOD:1]SAPLDAALHALQEEQAR.L	sp|P80217|IN35_HUMAN
U87MG_100ug_NHS_Rep1_5Frac_Frac-2_SII_2465_1_2465_3_1	2.08068	4.41421e-05	4.40539e-09	R.DTPAK[UNIMOD:56]NAQK[UNIMOD:56]SNQNGK[UNIMOD:56]DSK[UNIMOD:56]PSSTPR.S	sp|P06748|NPM_HUMAN
U87MG_100ug_NHS_Rep1_5Frac_Frac-1_SII_10697_1_10697_2_1	2.08046	4.41421e-05	4.41354e-09	-.[UNIMOD:1]MMC[UNIMOD:4]GAPSATQPATAETQHIADQVR.S	sp|P04080|CYTB_HUMAN
U87MG_100ug_NHS_Rep1_5Frac_Frac-3_SII_14624_1_14624_2_1	2.07948	4.41421e-05	4.45059e-09	R.[UNIMOD:28][UNIMOD:56]QLFHPEQLITGK[UNIMOD:56]EDAANNYAR.G	sp|P68363|TBA1B_HUMAN
U87MG_100ug_NHS_Rep1_5Frac_Frac-4_SII_15389_1_15389_2_1	2.07735	4.41421e-05	4.53209e-09	-.[UNIMOD:1]DDDIAALVVDNGSGMC[UNIMOD:4]K[UNIMOD:56]AGFAGDDAPR.A	sp|P60709|ACTB_HUMAN
U87MG_100ug_NHS_Rep1_5Frac_Frac-5_SII_11631_1_11631_2_1	2.07686	4.41421e-05	4.55113e-09	R.LQDEIQNMK[UNIMOD:56]EEMAR.H	sp|P08670|VIME_HUMAN
U87MG_100ug_NHS_Rep1_5Frac_Frac-5_SII_13438_1_13438_3_1	2.07615	4.41421e-05	4.57878e-09	F.[UNIMOD:56]K[UNIMOD:56]VGINYQPPTVVPGGDLAK[UNIMOD:56]VQR.A	sp|P68363|TBA1B_HUMAN
U87MG_100ug_NHS_Rep1_5Frac_Frac-3_SII_14014_1_14014_2_1	2.07521	4.41421e-05	4.61565e-09	Q.[UNIMOD:27]EQHVQIDVDVSK[UNIMOD:56]PDLTAALR.D	sp|P08670|VIME_HUMAN
U87MG_100ug_NHS_Rep1_5Frac_Frac-3_SII_14817_1_14817_2_1	2.07511	4.41421e-05	4.61942e-09	R.[UNIMOD:28]QLFHPEQLITGK[UNIMOD:56]EDAANNYAR.G	sp|P68363|TBA1B_HUMAN
U87MG_100ug_NHS_Rep1_5Frac_Frac-5_SII_11389_1_11389_2_1	2.07464	4.41421e-05	4.63789e-09	R.LTVEDPVTVEYITR.Y	sp|Q8TAA3|PSMA8_HUMAN
U87MG_100ug_NHS_Rep1_5Frac_Frac-3_SII_20262_1_20262_3_1	2.07384	4.41421e-05	4.66977e-09	R.[UNIMOD:28]QIIQQNPSLLPALLQQIGR.E	sp|P54727|RD23B_HUMAN
U87MG_100ug_NHS_Rep1_5Frac_Frac-1_SII_18099_1_18099_3_1	2.07383	4.41421e-05	4.6702e-09	R.[UNIMOD:56]SIGAAAK[UNIMOD:56]SQVISNAK[UNIMOD:56]NTVQGFK[UNIMOD:56]R.F	sp|P34932|HSP74_HUMAN
U87MG_100ug_NHS_Rep1_5Frac_Frac-5_SII_5890_1_5890_2_1	2.07369	4.41421e-05	4.67568e-09	R.EGPNK[UNIMOD:56]TGTSC[UNIMOD:4]ALDC[UNIMOD:4]GAGIGR.I	sp|Q9BV86|NTM1A_HUMAN
U87MG_100ug_NHS_Rep1_5Frac_Frac-4_SII_1627_1_1627_3_1	2.07368	4.41421e-05	4.67592e-09	R.EDGNEEDK[UNIMOD:56]ENQGDETQGQQPPQRR.Y	sp|P67809|YBOX1_HUMAN
U87MG_100ug_NHS_Rep1_5Frac_Frac-2_SII_22753_1_22753_2_1	2.07315	4.41421e-05	4.69723e-09	R.[UNIMOD:28]QDLK[UNIMOD:56]GLEETVAK[UNIMOD:56]ELQTLHNLR.K	sp|P33176|KINH_HUMAN
U87MG_100ug_NHS_Rep1_5Frac_Frac-4_SII_13156_1_13156_3_1	2.07183	4.41421e-05	4.75021e-09	R.FHVEEEGK[UNIMOD:56]GK[UNIMOD:56]DASGNK[UNIMOD:56]VK[UNIMOD:56]AEPAK[UNIMOD:56]IEAFR.A	sp|P00558|PGK1_HUMAN
U87MG_100ug_NHS_Rep1_5Frac_Frac-5_SII_8183_1_8183_2_1	2.07136	4.41421e-05	4.76926e-09	-.[UNIMOD:1]MMC[UNIMOD:4]GAPSATQPATAETQHIADQVR.S	sp|P04080|CYTB_HUMAN
U87MG_100ug_NHS_Rep1_5Frac_Frac-1_SII_11631_1_11631_2_1	2.07122	4.41421e-05	4.77496e-09	R.EMEENFAVEAANYQDTIGR.L	sp|P08670|VIME_HUMAN
U87MG_100ug_NHS_Rep1_5Frac_Frac-4_SII_18189_1_18189_3_1	2.07038	4.41421e-05	4.80959e-09	S.[UNIMOD:27]EK[UNIMOD:56]GESSGK[UNIMOD:56]NVTLPAVFK[UNIMOD:56]APIRPDIVNFVHTNLR.K	sp|P36578|RL4_HUMAN
U87MG_100ug_NHS_Rep1_5Frac_Frac-3_SII_10816_1_10816_2_1	2.06972	4.41421e-05	4.83649e-09	R.VSK[UNIMOD:56]SSWLEEDDDPVVAR.V	sp|O15460|P4HA2_HUMAN
U87MG_100ug_NHS_Rep1_5Frac_Frac-1_SII_7370_1_7370_2_1	2.06921	4.41421e-05	4.8578e-09	-.[UNIMOD:1]MHPAGLAAAAAGTPR.L	sp|Q5BJH7|YIF1B_HUMAN
U87MG_100ug_NHS_Rep1_5Frac_Frac-4_SII_7273_1_7273_2_1	2.06771	4.41421e-05	4.91995e-09	R.SEDFGVNEDLADSDAR.A	sp|P04083|ANXA1_HUMAN
U87MG_100ug_NHS_Rep1_5Frac_Frac-5_SII_20407_1_20407_3_1	2.06769	4.41421e-05	4.9209e-09	-.[UNIMOD:1]ASGVAVSDGVIK[UNIMOD:56]VFNDMK[UNIMOD:56]VR.K	sp|P23528|COF1_HUMAN
U87MG_100ug_NHS_Rep1_5Frac_Frac-4_SII_16247_1_16247_3_1	2.06689	4.41421e-05	4.95486e-09	-.[UNIMOD:1]SLSNK[UNIMOD:56]LTLDK[UNIMOD:56]LDVK[UNIMOD:56]GK[UNIMOD:56]R.V	sp|P00558|PGK1_HUMAN
U87MG_100ug_NHS_Rep1_5Frac_Frac-2_SII_17941_1_17941_2_1	2.06642	4.41421e-05	4.97436e-09	-.[UNIMOD:56]PAIMTMLADHAAR.Q	sp|O14980|XPO1_HUMAN
U87MG_100ug_NHS_Rep1_5Frac_Frac-3_SII_18100_1_18100_2_1	2.06622	4.41421e-05	4.98309e-09	-.[UNIMOD:1]EEEIAALVIDNGSGMC[UNIMOD:4]K[UNIMOD:56]AGFAGDDAPR.A	sp|P63261|ACTG_HUMAN
U87MG_100ug_NHS_Rep1_5Frac_Frac-3_SII_11787_1_11787_2_1	2.06594	4.41421e-05	4.99506e-09	R.EMEENFAVEAANYQDTIGR.L	sp|P08670|VIME_HUMAN
U87MG_100ug_NHS_Rep1_5Frac_Frac-5_SII_10359_1_10359_2_1	2.06574	4.41421e-05	5.00356e-09	R.ILENEK[UNIMOD:56]DLEEAEEYK[UNIMOD:56]EAR.L	sp|O75347|TBCA_HUMAN
U87MG_100ug_NHS_Rep1_5Frac_Frac-1_SII_1902_1_1902_2_1	2.06565	4.41421e-05	5.00728e-09	R.K[UNIMOD:56]HEAK[UNIMOD:56]K[UNIMOD:56]AAK[UNIMOD:56]QEAR.S	sp|Q9BY44|EIF2A_HUMAN
U87MG_100ug_NHS_Rep1_5Frac_Frac-5_SII_12983_1_12983_3_1	2.06551	4.41421e-05	5.01329e-09	-.[UNIMOD:1]M[UNIMOD:35]EGVEEK[UNIMOD:56]K[UNIMOD:56]K[UNIMOD:56]EVPAVPETLK[UNIMOD:56]K[UNIMOD:56]K[UNIMOD:56]R.R	sp|P18124|RL7_HUMAN
U87MG_100ug_NHS_Rep1_5Frac_Frac-1_SII_10686_1_10686_3_1	2.0646	4.41421e-05	5.05213e-09	-.[UNIMOD:56]PEPSK[UNIMOD:56]SAPAPK[UNIMOD:56]K[UNIMOD:56]GSK[UNIMOD:56]K[UNIMOD:56]AITK[UNIMOD:56]AQK[UNIMOD:56]K[UNIMOD:56]DGK[UNIMOD:56]K[UNIMOD:56]R.K	sp|P33778|H2B1B_HUMAN
U87MG_100ug_NHS_Rep1_5Frac_Frac-5_SII_17493_1_17493_3_1	2.06225	4.41421e-05	5.15432e-09	R.GEVAPDAK[UNIMOD:56]SFVLNLGK[UNIMOD:56]DSNNLC[UNIMOD:4]LHFNPR.F	sp|P09382|LEG1_HUMAN
U87MG_100ug_NHS_Rep1_5Frac_Frac-5_SII_22354_1_22354_3_1	2.06188	4.41421e-05	5.17061e-09	-.[UNIMOD:1]ASGVAVSDGVIK[UNIMOD:56]VFNDMK[UNIMOD:56]VR.K	sp|P23528|COF1_HUMAN
U87MG_100ug_NHS_Rep1_5Frac_Frac-4_SII_14067_1_14067_3_1	2.06142	4.41421e-05	5.19102e-09	R.FHVEEEGK[UNIMOD:56]GK[UNIMOD:56]DASGNK[UNIMOD:56]VK[UNIMOD:56]AEPAK[UNIMOD:56]IEAFR.A	sp|P00558|PGK1_HUMAN
U87MG_100ug_NHS_Rep1_5Frac_Frac-1_SII_12387_1_12387_2_1	2.06135	4.41421e-05	5.19426e-09	R.PFPDGLAEDIDK[UNIMOD:56]GEVSAR.Q	sp|P13639|EF2_HUMAN
U87MG_100ug_NHS_Rep1_5Frac_Frac-2_SII_16418_1_16418_3_1	2.06067	4.41421e-05	5.22442e-09	R.[UNIMOD:56]TATESFASDPILYRPVAVALDTK[UNIMOD:56]GPEIR.T	sp|P14618|KPYM_HUMAN
U87MG_100ug_NHS_Rep1_5Frac_Frac-5_SII_19671_1_19671_3_1	2.05964	4.41421e-05	5.27024e-09	R.SGVSLAALK[UNIMOD:56]K[UNIMOD:56]ALAAAGYDVEK[UNIMOD:56]NNSR.I	sp|P16403|H12_HUMAN
U87MG_100ug_NHS_Rep1_5Frac_Frac-1_SII_12274_1_12274_2_1	2.05809	4.41421e-05	5.3406e-09	R.PFPDGLAEDIDK[UNIMOD:56]GEVSAR.Q	sp|P13639|EF2_HUMAN
U87MG_100ug_NHS_Rep1_5Frac_Frac-3_SII_21833_1_21833_2_1	2.05787	4.41421e-05	5.35062e-09	R.LK[UNIMOD:56]DLEALLNSK[UNIMOD:56]EAALSTALSEK[UNIMOD:56]R.T	sp|P02545|LMNA_HUMAN
U87MG_100ug_NHS_Rep1_5Frac_Frac-4_SII_5608_1_5608_2_1	2.05625	4.41421e-05	5.42488e-09	R.NSNLVGAAHEELQQSR.I	sp|P02545|LMNA_HUMAN
U87MG_100ug_NHS_Rep1_5Frac_Frac-5_SII_22893_1_22893_3_1	2.05624	4.41421e-05	5.42519e-09	R.DALNIETAIK[UNIMOD:56]TK[UNIMOD:56]GVDEVTIVNILTNR.S	sp|P07355|ANXA2_HUMAN
U87MG_100ug_NHS_Rep1_5Frac_Frac-1_SII_21608_1_21608_3_1	2.0562	4.41421e-05	5.42718e-09	R.ASREEILAQAK[UNIMOD:56]ENEK[UNIMOD:56]K[UNIMOD:56]LK[UNIMOD:56]SMEAEMIQLQEELAAAER.A	sp|P35579|MYH9_HUMAN
U87MG_100ug_NHS_Rep1_5Frac_Frac-4_SII_24489_1_24489_3_1	2.05581	4.41421e-05	5.44533e-09	-.[UNIMOD:1]DDDIAALVVDNGSGMC[UNIMOD:4]K[UNIMOD:56]AGFAGDDAPR.A	sp|P60709|ACTB_HUMAN
U87MG_100ug_NHS_Rep1_5Frac_Frac-5_SII_18649_1_18649_3_1	2.05579	4.41421e-05	5.44645e-09	-.[UNIMOD:56]MK[UNIMOD:56]TILSNQTVDIPENVDITLK[UNIMOD:56]GR.T	sp|P32969|RL9_HUMAN
U87MG_100ug_NHS_Rep1_5Frac_Frac-5_SII_9744_1_9744_4_1	2.05505	4.41421e-05	5.48059e-09	D.PAK[UNIMOD:56]SAPAPK[UNIMOD:56]K[UNIMOD:56]GSK[UNIMOD:56]K[UNIMOD:56]AVTK[UNIMOD:56]AQK[UNIMOD:56]K[UNIMOD:56]DGK[UNIMOD:56]K[UNIMOD:56]R.K	sp|P62807|H2B1C_HUMAN
U87MG_100ug_NHS_Rep1_5Frac_Frac-3_SII_19651_1_19651_3_1	2.05498	4.41421e-05	5.48409e-09	R.[UNIMOD:28][UNIMOD:56]QTVAVGVIK[UNIMOD:56]AVDK[UNIMOD:56]K[UNIMOD:56]AAGAGK[UNIMOD:56]VTK[UNIMOD:56]SAQK[UNIMOD:56]AQK[UNIMOD:56]AK[UNIMOD:56].-	sp|P68104|EF1A1_HUMAN
U87MG_100ug_NHS_Rep1_5Frac_Frac-4_SII_12570_1_12570_3_1	2.05253	4.41421e-05	5.59975e-09	R.FHVEEEGK[UNIMOD:56]GK[UNIMOD:56]DASGNK[UNIMOD:56]VK[UNIMOD:56]AEPAK[UNIMOD:56]IEAFR.A	sp|P00558|PGK1_HUMAN
U87MG_100ug_NHS_Rep1_5Frac_Frac-3_SII_22822_1_22822_3_1	2.05201	4.41421e-05	5.62445e-09	R.NPPIDDLIK[UNIMOD:56]SGILPILVHC[UNIMOD:4]LER.D	sp|O00629|IMA3_HUMAN
U87MG_100ug_NHS_Rep1_5Frac_Frac-2_SII_15107_1_15107_3_1	2.05183	4.41421e-05	5.63321e-09	-.[UNIMOD:56]PALPLDQLQITHK[UNIMOD:56]DPK[UNIMOD:56]TGK[UNIMOD:56]LR.T	sp|Q9H1I8|ASCC2_HUMAN
U87MG_100ug_NHS_Rep1_5Frac_Frac-4_SII_20971_1_20971_3_1	2.05178	4.41421e-05	5.63547e-09	R.GALQNIIPASTGAAK[UNIMOD:56]AVGK[UNIMOD:56]VIPELNGK[UNIMOD:56]LTGM[UNIMOD:35]AFR.V	sp|P04406|G3P_HUMAN
U87MG_100ug_NHS_Rep1_5Frac_Frac-5_SII_14050_1_14050_3_1	2.05176	4.41421e-05	5.63668e-09	-.[UNIMOD:1]M[UNIMOD:35]DK[UNIMOD:56]NELVQK[UNIMOD:56]AK[UNIMOD:56]LAEQAER.Y	sp|P63104|1433Z_HUMAN
U87MG_100ug_NHS_Rep1_5Frac_Frac-5_SII_19569_1_19569_3_1	2.05152	4.41421e-05	5.64796e-09	A.[UNIMOD:27]EGEAEAAK[UNIMOD:56]MLGEALSK[UNIMOD:56]NPGYIK[UNIMOD:56]LR.K	sp|Q99623|PHB2_HUMAN
U87MG_100ug_NHS_Rep1_5Frac_Frac-5_SII_8793_1_8793_4_1	2.05054	4.41421e-05	5.69568e-09	-.[UNIMOD:1]PDPSK[UNIMOD:56]SAPAPK[UNIMOD:56]K[UNIMOD:56]GSK[UNIMOD:56]K[UNIMOD:56]AVTK[UNIMOD:56]AQK[UNIMOD:56]K[UNIMOD:56]DGK[UNIMOD:56]K[UNIMOD:56]R.K	sp|Q8N257|H2B3B_HUMAN
U87MG_100ug_NHS_Rep1_5Frac_Frac-3_SII_14999_1_14999_3_1	2.05049	4.41421e-05	5.698e-09	R.EK[UNIMOD:56]QGTK[UNIMOD:56]VADSSK[UNIMOD:56]GPDEAK[UNIMOD:56]IK[UNIMOD:56]ALLER.T	sp|O60506|HNRPQ_HUMAN
U87MG_100ug_NHS_Rep1_5Frac_Frac-3_SII_16068_1_16068_3_1	2.05041	4.41421e-05	5.70195e-09	G.[UNIMOD:27]EVIVTK[UNIMOD:56]DDAMLLK[UNIMOD:56]GK[UNIMOD:56]GDK[UNIMOD:56]AQIEK[UNIMOD:56]R.I	sp|P10809|CH60_HUMAN
U87MG_100ug_NHS_Rep1_5Frac_Frac-3_SII_14073_1_14073_3_1	2.05032	4.41421e-05	5.70594e-09	-.[UNIMOD:1]AAVQAAEVK[UNIMOD:56]VDGSEPK[UNIMOD:56]LSK[UNIMOD:56]NELK[UNIMOD:56]R.R	sp|Q15046|SYK_HUMAN
U87MG_100ug_NHS_Rep1_5Frac_Frac-1_SII_14320_1_14320_3_1	2.04945	4.41421e-05	5.74851e-09	R.YASIC[UNIMOD:4]QQNGIVPIVEPEILPDGDHDLK[UNIMOD:56]R.C	sp|P09972|ALDOC_HUMAN
U87MG_100ug_NHS_Rep1_5Frac_Frac-2_SII_5480_1_5480_2_1	2.04917	4.41421e-05	5.76232e-09	R.THFK[UNIMOD:56]K[UNIMOD:56]SLDDGK[UNIMOD:56]VSR.V	sp|Q9Y6Y8|S23IP_HUMAN
U87MG_100ug_NHS_Rep1_5Frac_Frac-5_SII_11177_1_11177_3_1	2.04867	4.41421e-05	5.78689e-09	R.NHIQLVK[UNIMOD:56]LQVEEVHQLSR.K	sp|Q9NR28|DBLOH_HUMAN
U87MG_100ug_NHS_Rep1_5Frac_Frac-1_SII_22272_1_22272_3_1	2.04862	4.41421e-05	5.78933e-09	R.[UNIMOD:56]LLEMNLMHAPQVADAILGNQMFTHYDR.A	sp|Q00610|CLH1_HUMAN
U87MG_100ug_NHS_Rep1_5Frac_Frac-5_SII_9740_1_9740_2_1	2.04801	4.41421e-05	5.81943e-09	F.[UNIMOD:27]EK[UNIMOD:56]NEAIQAAHDAVAQEGQC[UNIMOD:4]R.V	sp|P09936|UCHL1_HUMAN
U87MG_100ug_NHS_Rep1_5Frac_Frac-5_SII_18714_1_18714_3_1	2.0472	4.41421e-05	5.86015e-09	R.[UNIMOD:56]GEALSALDSK[UNIMOD:56]ANNLSSLSK[UNIMOD:56]K[UNIMOD:56]YR.Q	sp|O75396|SC22B_HUMAN
U87MG_100ug_NHS_Rep1_5Frac_Frac-5_SII_9266_1_9266_3_1	2.04702	4.41421e-05	5.8691e-09	-.[UNIMOD:1]AWK[UNIMOD:56]SGGASHSELIHNLR.K	sp|P22061|PIMT_HUMAN
U87MG_100ug_NHS_Rep1_5Frac_Frac-3_SII_16051_1_16051_3_1	2.047	4.41421e-05	5.86984e-09	R.AQHEDQVEQYK[UNIMOD:56]K[UNIMOD:56]ELEK[UNIMOD:56]TYSAK[UNIMOD:56]LDNAR.Q	sp|P02545|LMNA_HUMAN
U87MG_100ug_NHS_Rep1_5Frac_Frac-5_SII_7825_1_7825_3_1	2.04657	4.41421e-05	5.89165e-09	R.FNAHGDANTIVC[UNIMOD:4]NSK[UNIMOD:56]DGGAWGTEQR.E	sp|P09382|LEG1_HUMAN
U87MG_100ug_NHS_Rep1_5Frac_Frac-5_SII_19323_1_19323_3_1	2.04637	4.41421e-05	5.90172e-09	-.[UNIMOD:1]ATNFLAHEK[UNIMOD:56]IWFDK[UNIMOD:56]FK[UNIMOD:56]YDDAERR.F	sp|P29692|EF1D_HUMAN
U87MG_100ug_NHS_Rep1_5Frac_Frac-5_SII_5904_1_5904_3_1	2.04597	4.41421e-05	5.92152e-09	R.K[UNIMOD:56]K[UNIMOD:56]QVAPEK[UNIMOD:56]PVK[UNIMOD:56]K[UNIMOD:56]QK[UNIMOD:56]TGETSR.A	sp|P53999|TCP4_HUMAN
U87MG_100ug_NHS_Rep1_5Frac_Frac-3_SII_6524_1_6524_2_1	2.04576	4.41421e-05	5.93233e-09	-.[UNIMOD:56]AAAGAAATHLEVAR.G	sp|Q96S52|PIGS_HUMAN
U87MG_100ug_NHS_Rep1_5Frac_Frac-1_SII_9998_1_9998_3_1	2.04576	4.41421e-05	5.93246e-09	R.[UNIMOD:56]GGMK[UNIMOD:56]K[UNIMOD:56]K[UNIMOD:56]TTHFVEGGDAGNREDQINR.L	sp|P18124|RL7_HUMAN
U87MG_100ug_NHS_Rep1_5Frac_Frac-3_SII_10924_1_10924_3_1	2.04503	4.41421e-05	5.9694e-09	K.[UNIMOD:27]EIGGDVQK[UNIMOD:56]HAEMVHTGLK[UNIMOD:56]LER.A	sp|Q01518|CAP1_HUMAN
U87MG_100ug_NHS_Rep1_5Frac_Frac-5_SII_3344_1_3344_2_1	2.04494	4.41421e-05	5.97377e-09	-.[UNIMOD:1]AATGANAEK[UNIMOD:56]AESHNDC[UNIMOD:4]PVR.L	sp|Q16831|UPP1_HUMAN
U87MG_100ug_NHS_Rep1_5Frac_Frac-4_SII_16301_1_16301_2_1	2.04483	4.41421e-05	5.97939e-09	R.K[UNIMOD:56]GTDVPK[UNIMOD:56]WISIMTER.S	sp|A6NMY6|AXA2L_HUMAN
U87MG_100ug_NHS_Rep1_5Frac_Frac-1_SII_16794_1_16794_4_1	2.04461	4.41421e-05	5.99058e-09	-.[UNIMOD:1]SK[UNIMOD:56]PHSEAGTAFIQTQQLHAAMADTFLEHMC[UNIMOD:4]R.L	sp|P14618|KPYM_HUMAN
U87MG_100ug_NHS_Rep1_5Frac_Frac-3_SII_15840_1_15840_3_1	2.04443	4.41421e-05	5.99977e-09	R.NNGVVDK[UNIMOD:56]SLFSNVVTK[UNIMOD:56]NK[UNIMOD:56]DLPESALR.D	sp|P31939|PUR9_HUMAN
U87MG_100ug_NHS_Rep1_5Frac_Frac-1_SII_5317_1_5317_2_1	2.04396	4.41421e-05	6.02419e-09	R.IVEDEPNK[UNIMOD:56]IC[UNIMOD:4]EADR.V	sp|P55060|XPO2_HUMAN
U87MG_100ug_NHS_Rep1_5Frac_Frac-5_SII_16486_1_16486_2_1	2.04387	4.41421e-05	6.02847e-09	-.[UNIMOD:1]SAPLDAALHALQEEQAR.L	sp|P80217|IN35_HUMAN
U87MG_100ug_NHS_Rep1_5Frac_Frac-3_SII_4816_1_4816_2_1	2.04346	4.41421e-05	6.04985e-09	R.NPLTK[UNIMOD:56]EDK[UNIMOD:56]EAETAR.L	sp|Q15813|TBCE_HUMAN
U87MG_100ug_NHS_Rep1_5Frac_Frac-5_SII_14926_1_14926_3_1	2.04303	4.41421e-05	6.0717e-09	R.LVK[UNIMOD:56]EK[UNIMOD:56]VMYEK[UNIMOD:56]EAK[UNIMOD:56]QQEEK[UNIMOD:56]IEK[UNIMOD:56]MR.A	sp|O75347|TBCA_HUMAN
U87MG_100ug_NHS_Rep1_5Frac_Frac-3_SII_18255_1_18255_2_1	2.04279	4.41421e-05	6.08424e-09	R.FLEQQNK[UNIMOD:56]ILLAELEQLK[UNIMOD:56]GQGK[UNIMOD:56]SR.L	sp|P08670|VIME_HUMAN
U87MG_100ug_NHS_Rep1_5Frac_Frac-3_SII_12294_1_12294_3_1	2.04259	4.41421e-05	6.09501e-09	R.SIAK[UNIMOD:56]EGFEK[UNIMOD:56]ISK[UNIMOD:56]GANPVEIRR.G	sp|P10809|CH60_HUMAN
U87MG_100ug_NHS_Rep1_5Frac_Frac-5_SII_17505_1_17505_2_1	2.04252	4.41421e-05	6.09851e-09	R.SGTVDPQELQK[UNIMOD:56]ALTTMGFR.L	sp|P30626|SORCN_HUMAN
U87MG_100ug_NHS_Rep1_5Frac_Frac-4_SII_16443_1_16443_3_1	2.04204	4.41421e-05	6.12324e-09	R.FHVEEEGK[UNIMOD:56]GK[UNIMOD:56]DASGNK[UNIMOD:56]VK[UNIMOD:56]AEPAK[UNIMOD:56]IEAFR.A	sp|P00558|PGK1_HUMAN
U87MG_100ug_NHS_Rep1_5Frac_Frac-3_SII_12668_1_12668_3_1	2.04163	4.41421e-05	6.14456e-09	N.[UNIMOD:27]ETWGVTK[UNIMOD:56]AAEK[UNIMOD:56]QMK[UNIMOD:56]DK[UNIMOD:56]QDEEQR.L	sp|P27797|CALR_HUMAN
U87MG_100ug_NHS_Rep1_5Frac_Frac-2_SII_7125_1_7125_3_1	2.04134	4.41421e-05	6.16012e-09	G.[UNIMOD:27]EEK[UNIMOD:56]PIGAGEEK[UNIMOD:56]QK[UNIMOD:56]EGGK[UNIMOD:56]K[UNIMOD:56]K[UNIMOD:56]NK[UNIMOD:56]EGSGDGGR.A	sp|P26639|SYTC_HUMAN
U87MG_100ug_NHS_Rep1_5Frac_Frac-2_SII_20925_1_20925_2_1	2.04113	4.41421e-05	6.17084e-09	R.[UNIMOD:56]SLVEIIEHGLVDEQQK[UNIMOD:56]VR.T	sp|O75533|SF3B1_HUMAN
U87MG_100ug_NHS_Rep1_5Frac_Frac-4_SII_20427_1_20427_3_1	2.04111	4.41421e-05	6.17214e-09	R.FHVEEEGK[UNIMOD:56]GK[UNIMOD:56]DASGNK[UNIMOD:56]VK[UNIMOD:56]AEPAK[UNIMOD:56]IEAFR.A	sp|P00558|PGK1_HUMAN
U87MG_100ug_NHS_Rep1_5Frac_Frac-3_SII_10649_1_10649_3_1	2.0411	4.41421e-05	6.17249e-09	R.ENENGEEEEEEAEFGEEDLFHQQGDPR.T	sp|Q03252|LMNB2_HUMAN
U87MG_100ug_NHS_Rep1_5Frac_Frac-3_SII_21884_1_21884_3_1	2.04106	4.41421e-05	6.17449e-09	R.[UNIMOD:56]GLK[UNIMOD:56]MSATFIGNSTAIQELFK[UNIMOD:56]R.I	sp|P68371|TBB4B_HUMAN
U87MG_100ug_NHS_Rep1_5Frac_Frac-3_SII_6855_1_6855_2_1	2.04106	4.41421e-05	6.17466e-09	F.[UNIMOD:27]EVK[UNIMOD:56]STAGDTHLGGEDFDNR.M	sp|P54652|HSP72_HUMAN
U87MG_100ug_NHS_Rep1_5Frac_Frac-5_SII_18338_1_18338_2_1	2.04054	4.41421e-05	6.20197e-09	R.NDFQLIGIQDGYLSLLQDSGEVR.E	sp|P63241|IF5A1_HUMAN
U87MG_100ug_NHS_Rep1_5Frac_Frac-4_SII_18693_1_18693_3_1	2.04007	4.41421e-05	6.22731e-09	C.[UNIMOD:27]EQALAAEPK[UNIMOD:56]AK[UNIMOD:56]DPFAHLPK[UNIMOD:56]STFVLDEFK[UNIMOD:56]R.K	sp|P26641|EF1G_HUMAN
U87MG_100ug_NHS_Rep1_5Frac_Frac-2_SII_22739_1_22739_3_1	2.03923	4.41421e-05	6.27163e-09	R.[UNIMOD:56]IK[UNIMOD:56]EIVK[UNIMOD:56]K[UNIMOD:56]HSQFIGYPITLFVEK[UNIMOD:56]ER.D	sp|P07900|HS90A_HUMAN
U87MG_100ug_NHS_Rep1_5Frac_Frac-5_SII_17631_1_17631_3_1	2.03897	4.41421e-05	6.28571e-09	-.[UNIMOD:56]PK[UNIMOD:56]GK[UNIMOD:56]K[UNIMOD:56]AK[UNIMOD:56]GK[UNIMOD:56]K[UNIMOD:56]VAPAPAVVK[UNIMOD:56]K[UNIMOD:56]QEAK[UNIMOD:56]K[UNIMOD:56]VVNPLFEK[UNIMOD:56]R.P	sp|P62424|RL7A_HUMAN
U87MG_100ug_NHS_Rep1_5Frac_Frac-4_SII_22146_1_22146_3_1	2.03773	4.41421e-05	6.35264e-09	A.[UNIMOD:56]GPAVIEC[UNIMOD:4]WFVEDASGK[UNIMOD:56]GLAK[UNIMOD:56]RPGALLLR.Q	sp|O15533|TPSN_HUMAN
U87MG_100ug_NHS_Rep1_5Frac_Frac-2_SII_15903_1_15903_2_1	2.03761	4.41421e-05	6.35926e-09	-.[UNIMOD:1]TAVHAGNINFK[UNIMOD:56]WDPK[UNIMOD:56]SLEIR.T	sp|P35221|CTNA1_HUMAN
U87MG_100ug_NHS_Rep1_5Frac_Frac-2_SII_13606_1_13606_4_1	2.03605	4.41421e-05	6.44431e-09	-.[UNIMOD:1]SK[UNIMOD:56]PHSEAGTAFIQTQQLHAAM[UNIMOD:35]ADTFLEHMC[UNIMOD:4]R.L	sp|P14618|KPYM_HUMAN
U87MG_100ug_NHS_Rep1_5Frac_Frac-3_SII_20076_1_20076_3_1	2.03568	4.41421e-05	6.46467e-09	R.[UNIMOD:56]GLK[UNIMOD:56]M[UNIMOD:35]ASTFIGNSTAIQELFK[UNIMOD:56]R.I	sp|Q9BUF5|TBB6_HUMAN
U87MG_100ug_NHS_Rep1_5Frac_Frac-5_SII_23432_1_23432_2_1	2.03542	4.41421e-05	6.47886e-09	-.[UNIMOD:1]ASGVAVSDGVIK[UNIMOD:56]VFNDMK[UNIMOD:56]VR.K	sp|P23528|COF1_HUMAN
U87MG_100ug_NHS_Rep1_5Frac_Frac-5_SII_22596_1_22596_3_1	2.03518	4.41421e-05	6.49223e-09	-.[UNIMOD:1]ASGVAVSDGVIK[UNIMOD:56]VFNDMK[UNIMOD:56]VR.K	sp|P23528|COF1_HUMAN
U87MG_100ug_NHS_Rep1_5Frac_Frac-5_SII_18408_1_18408_2_1	2.03408	4.41421e-05	6.55337e-09	R.YSDESGNMDFDNFISC[UNIMOD:4]LVR.L	sp|P04632|CPNS1_HUMAN
U87MG_100ug_NHS_Rep1_5Frac_Frac-4_SII_16178_1_16178_3_1	2.03407	4.41421e-05	6.55388e-09	-.[UNIMOD:1]SLSNK[UNIMOD:56]LTLDK[UNIMOD:56]LDVK[UNIMOD:56]GK[UNIMOD:56]R.V	sp|P00558|PGK1_HUMAN
U87MG_100ug_NHS_Rep1_5Frac_Frac-5_SII_4424_1_4424_3_1	2.03406	4.41421e-05	6.55451e-09	-.[UNIMOD:1]SSK[UNIMOD:56]K[UNIMOD:56]AK[UNIMOD:56]TK[UNIMOD:56]TTK[UNIMOD:56]K[UNIMOD:56]RPQR.A	sp|O14950|ML12B_HUMAN
U87MG_100ug_NHS_Rep1_5Frac_Frac-5_SII_16382_1_16382_3_1	2.03397	4.41421e-05	6.5596e-09	R.VSFELFADK[UNIMOD:56]VPK[UNIMOD:56]TAENFR.A	sp|P62937|PPIA_HUMAN
U87MG_100ug_NHS_Rep1_5Frac_Frac-4_SII_12778_1_12778_2_1	2.03371	4.41421e-05	6.57396e-09	R.QVQSLTC[UNIMOD:4]EVDALK[UNIMOD:56]GTNESLER.Q	sp|P08670|VIME_HUMAN
U87MG_100ug_NHS_Rep1_5Frac_Frac-3_SII_1820_1_1820_2_1	2.0336	4.41421e-05	6.57991e-09	R.K[UNIMOD:56]HEAK[UNIMOD:56]K[UNIMOD:56]AAK[UNIMOD:56]QEAR.S	sp|Q9BY44|EIF2A_HUMAN
U87MG_100ug_NHS_Rep1_5Frac_Frac-4_SII_14299_1_14299_3_1	2.03347	4.41421e-05	6.58761e-09	R.FHVEEEGK[UNIMOD:56]GK[UNIMOD:56]DASGNK[UNIMOD:56]VK[UNIMOD:56]AEPAK[UNIMOD:56]IEAFR.A	sp|P00558|PGK1_HUMAN
U87MG_100ug_NHS_Rep1_5Frac_Frac-3_SII_21720_1_21720_3_1	2.03342	4.41421e-05	6.59028e-09	-.[UNIMOD:1]ALHVPK[UNIMOD:56]APGFAQMLK[UNIMOD:56]EGAK[UNIMOD:56]HFSGLEEAVYR.N	sp|P50990|TCPQ_HUMAN
U87MG_100ug_NHS_Rep1_5Frac_Frac-4_SII_10236_1_10236_2_1	2.0334	4.41421e-05	6.59144e-09	-.[UNIMOD:1]SLK[UNIMOD:56]LQASNVTNK[UNIMOD:56]NDPK[UNIMOD:56]SINSR.V	sp|Q9UKM9|RALY_HUMAN
U87MG_100ug_NHS_Rep1_5Frac_Frac-4_SII_12488_1_12488_3_1	2.03334	4.41421e-05	6.59446e-09	R.QHIVNDMNPGNLHLFINAYNSR.R	sp|Q92597|NDRG1_HUMAN
U87MG_100ug_NHS_Rep1_5Frac_Frac-5_SII_18364_1_18364_2_1	2.0331	4.41421e-05	6.60841e-09	R.NDFQLIGIQDGYLSLLQDSGEVR.E	sp|P63241|IF5A1_HUMAN
U87MG_100ug_NHS_Rep1_5Frac_Frac-1_SII_19498_1_19498_3_1	2.03307	4.41421e-05	6.60965e-09	R.[UNIMOD:56]K[UNIMOD:56]DGNASGTTLLEALDC[UNIMOD:4]ILPPTRPTDK[UNIMOD:56]PLR.L	sp|P68104|EF1A1_HUMAN
U87MG_100ug_NHS_Rep1_5Frac_Frac-4_SII_16102_1_16102_2_1	2.03277	4.41421e-05	6.62657e-09	R.DHQPC[UNIMOD:4]IIFMDEIDAIGGR.R	sp|P62333|PRS10_HUMAN
U87MG_100ug_NHS_Rep1_5Frac_Frac-1_SII_7135_1_7135_2_1	2.03269	4.41421e-05	6.63118e-09	R.K[UNIMOD:56]GEFETGFEK[UNIMOD:56]GGQTR.E	sp|P15170|ERF3A_HUMAN
U87MG_100ug_NHS_Rep1_5Frac_Frac-5_SII_15091_1_15091_3_1	2.03236	4.41421e-05	6.65024e-09	R.[UNIMOD:56]SSFYVNGLTLGGQK[UNIMOD:56]C[UNIMOD:4]SVIR.D	sp|P07737|PROF1_HUMAN
U87MG_100ug_NHS_Rep1_5Frac_Frac-5_SII_23866_1_23866_3_1	2.03175	4.41421e-05	6.68457e-09	-.[UNIMOD:1]ASGVAVSDGVIK[UNIMOD:56]VFNDMK[UNIMOD:56]VR.K	sp|P23528|COF1_HUMAN
U87MG_100ug_NHS_Rep1_5Frac_Frac-1_SII_16815_1_16815_4_1	2.0315	4.41421e-05	6.69876e-09	-.[UNIMOD:1]SK[UNIMOD:56]PHSEAGTAFIQTQQLHAAMADTFLEHMC[UNIMOD:4]R.L	sp|P14618|KPYM_HUMAN
U87MG_100ug_NHS_Rep1_5Frac_Frac-3_SII_10751_1_10751_2_1	2.03114	4.41421e-05	6.71968e-09	R.VSK[UNIMOD:56]SSWLEEDDDPVVAR.V	sp|O15460|P4HA2_HUMAN
U87MG_100ug_NHS_Rep1_5Frac_Frac-4_SII_11371_1_11371_2_1	2.03113	4.41421e-05	6.71988e-09	R.[UNIMOD:56]SELHIENLNMEADPGQYR.C	sp|P35613|BASI_HUMAN
U87MG_100ug_NHS_Rep1_5Frac_Frac-1_SII_5950_1_5950_2_1	2.03091	4.41421e-05	6.73267e-09	R.NSNLVGAAHEELQQSR.I	sp|P02545|LMNA_HUMAN
U87MG_100ug_NHS_Rep1_5Frac_Frac-2_SII_17341_1_17341_4_1	2.03035	4.41421e-05	6.76487e-09	R.IAEFTTNLTEEEEK[UNIMOD:56]SK[UNIMOD:56]SLAK[UNIMOD:56]LK[UNIMOD:56]NK[UNIMOD:56]HEAMITDLEER.L	sp|P35579|MYH9_HUMAN
U87MG_100ug_NHS_Rep1_5Frac_Frac-4_SII_9292_1_9292_2_1	2.03029	4.41421e-05	6.76848e-09	-.[UNIMOD:1]TSK[UNIMOD:56]GPEEEHPSVTLFR.Q	sp|Q03154|ACY1_HUMAN
U87MG_100ug_NHS_Rep1_5Frac_Frac-5_SII_10983_1_10983_2_1	2.02981	4.41421e-05	6.79584e-09	R.GWLK[UNIMOD:56]SNVSDAVAQSTR.I	sp|P60174|TPIS_HUMAN
U87MG_100ug_NHS_Rep1_5Frac_Frac-1_SII_7576_1_7576_3_1	2.02926	4.41421e-05	6.828e-09	R.[UNIMOD:28]QK[UNIMOD:56]NVHEVK[UNIMOD:56]DHK[UNIMOD:56]FIAR.F	sp|P17252|KPCA_HUMAN
U87MG_100ug_NHS_Rep1_5Frac_Frac-5_SII_13075_1_13075_2_1	2.02854	4.41421e-05	6.86981e-09	R.YDDMATC[UNIMOD:4]MK[UNIMOD:56]AVTEQGAELSNEER.N	sp|P27348|1433T_HUMAN
U87MG_100ug_NHS_Rep1_5Frac_Frac-3_SII_11793_1_11793_3_1	2.0285	4.41421e-05	6.87222e-09	R.EEAENTLQSFRQDVDNASLAR.L	sp|P08670|VIME_HUMAN
U87MG_100ug_NHS_Rep1_5Frac_Frac-4_SII_19937_1_19937_3_1	2.02835	4.41421e-05	6.88112e-09	R.VK[UNIMOD:56]EK[UNIMOD:56]EAELK[UNIMOD:56]EAEK[UNIMOD:56]ELHEK[UNIMOD:56]FDLLK[UNIMOD:56]R.T	sp|Q9NVA2|SEP11_HUMAN
U87MG_100ug_NHS_Rep1_5Frac_Frac-5_SII_15559_1_15559_2_1	2.02821	4.41421e-05	6.88919e-09	-.[UNIMOD:1]ASGVAVSDGVIK[UNIMOD:56]VFNDM[UNIMOD:35]K[UNIMOD:56]VR.K	sp|P23528|COF1_HUMAN
U87MG_100ug_NHS_Rep1_5Frac_Frac-1_SII_20040_1_20040_4_1	2.02744	4.41421e-05	6.9348e-09	R.VK[UNIMOD:56]EK[UNIMOD:56]EAELK[UNIMOD:56]EAEK[UNIMOD:56]ELHEK[UNIMOD:56]FDLLK[UNIMOD:56]R.T	sp|Q9NVA2|SEP11_HUMAN
U87MG_100ug_NHS_Rep1_5Frac_Frac-4_SII_22715_1_22715_3_1	2.02684	4.41421e-05	6.97054e-09	-.[UNIMOD:1]DDDIAALVVDNGSGMC[UNIMOD:4]K[UNIMOD:56]AGFAGDDAPR.A	sp|P60709|ACTB_HUMAN
U87MG_100ug_NHS_Rep1_5Frac_Frac-3_SII_6177_1_6177_2_1	2.02675	4.41421e-05	6.97566e-09	R.NQEQMK[UNIMOD:56]PLEEK[UNIMOD:56]QEEER.S	sp|P62191|PRS4_HUMAN
U87MG_100ug_NHS_Rep1_5Frac_Frac-4_SII_14802_1_14802_3_1	2.02571	4.41421e-05	7.03773e-09	R.[UNIMOD:56]YASIC[UNIMOD:4]QQNGIVPIVEPEILPDGDHDLK[UNIMOD:56]R.C	sp|P09972|ALDOC_HUMAN
U87MG_100ug_NHS_Rep1_5Frac_Frac-2_SII_15207_1_15207_3_1	2.02555	4.41421e-05	7.04727e-09	E.[UNIMOD:27]EK[UNIMOD:56]SK[UNIMOD:56]SLAK[UNIMOD:56]LK[UNIMOD:56]NK[UNIMOD:56]HEAMITDLEER.L	sp|P35579|MYH9_HUMAN
U87MG_100ug_NHS_Rep1_5Frac_Frac-5_SII_21849_1_21849_3_1	2.02535	4.41421e-05	7.05952e-09	-.[UNIMOD:1]AAAAELSLLEK[UNIMOD:56]SLGLSK[UNIMOD:56]GNK[UNIMOD:56]YSAQGER.Q	sp|O43324|MCA3_HUMAN
U87MG_100ug_NHS_Rep1_5Frac_Frac-3_SII_9199_1_9199_4_1	2.02452	4.41421e-05	7.10956e-09	R.[UNIMOD:56]HQGVMVGMGQK[UNIMOD:56]DSYVGDEAQSK[UNIMOD:56]R.G	sp|P60709|ACTB_HUMAN
U87MG_100ug_NHS_Rep1_5Frac_Frac-5_SII_5863_1_5863_3_1	2.02376	4.41421e-05	7.15595e-09	R.K[UNIMOD:56]K[UNIMOD:56]QVAPEK[UNIMOD:56]PVK[UNIMOD:56]K[UNIMOD:56]QK[UNIMOD:56]TGETSR.A	sp|P53999|TCP4_HUMAN
U87MG_100ug_NHS_Rep1_5Frac_Frac-2_SII_11785_1_11785_2_1	2.02368	4.41421e-05	7.1607e-09	R.[UNIMOD:56]ANHLNK[UNIMOD:56]LAEK[UNIMOD:56]EETGMAMR.I	sp|P21980|TGM2_HUMAN
U87MG_100ug_NHS_Rep1_5Frac_Frac-5_SII_10165_1_10165_3_1	2.02286	4.41421e-05	7.21093e-09	R.K[UNIMOD:56]AK[UNIMOD:56]K[UNIMOD:56]EAPPMEK[UNIMOD:56]PEVVK[UNIMOD:56]THLR.D	sp|P62841|RS15_HUMAN
U87MG_100ug_NHS_Rep1_5Frac_Frac-4_SII_19068_1_19068_3_1	2.02257	4.41421e-05	7.22886e-09	-.[UNIMOD:1]SGEDEQQEQTIAEDLVVTK[UNIMOD:56]YK[UNIMOD:56]MGGDIANR.V	sp|Q9UQ80|PA2G4_HUMAN
U87MG_100ug_NHS_Rep1_5Frac_Frac-5_SII_18827_1_18827_2_1	2.0225	4.41421e-05	7.23288e-09	R.NDFQLIGIQDGYLSLLQDSGEVR.E	sp|P63241|IF5A1_HUMAN
U87MG_100ug_NHS_Rep1_5Frac_Frac-3_SII_13743_1_13743_2_1	2.02224	4.41421e-05	7.24904e-09	R.[UNIMOD:56]TADGIVSHLK[UNIMOD:56]K[UNIMOD:56]QAGPASVPLR.T	sp|P30101|PDIA3_HUMAN
U87MG_100ug_NHS_Rep1_5Frac_Frac-3_SII_22874_1_22874_3_1	2.02195	4.41421e-05	7.2669e-09	R.[UNIMOD:56]GLK[UNIMOD:56]MASTFIGNSTAIQELFK[UNIMOD:56]R.I	sp|Q9BUF5|TBB6_HUMAN
U87MG_100ug_NHS_Rep1_5Frac_Frac-3_SII_18445_1_18445_4_1	2.02124	4.41421e-05	7.31092e-09	R.AGK[UNIMOD:56]PVIC[UNIMOD:4]ATQMLESMIK[UNIMOD:56]K[UNIMOD:56]PRPTR.A	sp|P14618|KPYM_HUMAN
U87MG_100ug_NHS_Rep1_5Frac_Frac-2_SII_20507_1_20507_3_1	2.02122	4.41421e-05	7.31228e-09	R.DAGDK[UNIMOD:56]DK[UNIMOD:56]EQELSEEDK[UNIMOD:56]QLQDELEMLVER.L	sp|Q13200|PSMD2_HUMAN
U87MG_100ug_NHS_Rep1_5Frac_Frac-5_SII_15084_1_15084_4_1	2.02093	4.41421e-05	7.33039e-09	R.THFGGGK[UNIMOD:56]TTGFGMIYDSLDYAK[UNIMOD:56]K[UNIMOD:56]NEPK[UNIMOD:56]HR.L	sp|P62847|RS24_HUMAN
U87MG_100ug_NHS_Rep1_5Frac_Frac-4_SII_14723_1_14723_2_1	2.02072	4.41421e-05	7.34322e-09	R.[UNIMOD:56]QLFHPEQLITGK[UNIMOD:56]EDAANNYAR.G	sp|P68363|TBA1B_HUMAN
U87MG_100ug_NHS_Rep1_5Frac_Frac-3_SII_18326_1_18326_2_1	2.02072	4.41421e-05	7.34382e-09	R.[UNIMOD:56]SVTLLIK[UNIMOD:56]GPNK[UNIMOD:56]HTLTQIK[UNIMOD:56]DAVR.D	sp|P40227|TCPZ_HUMAN
U87MG_100ug_NHS_Rep1_5Frac_Frac-1_SII_6721_1_6721_2_1	2.0206	4.41421e-05	7.35092e-09	R.K[UNIMOD:56]AVVVC[UNIMOD:4]PK[UNIMOD:56]DEDYK[UNIMOD:56]QR.T	sp|Q00839|HNRPU_HUMAN
U87MG_100ug_NHS_Rep1_5Frac_Frac-4_SII_8769_1_8769_3_1	2.02014	4.41421e-05	7.37983e-09	R.[UNIMOD:1]HQGVM[UNIMOD:35]VGMGQK[UNIMOD:56]DSYVGDEAQSK[UNIMOD:56]R.G	sp|P60709|ACTB_HUMAN
U87MG_100ug_NHS_Rep1_5Frac_Frac-4_SII_17960_1_17960_3_1	2.02013	4.41421e-05	7.38035e-09	R.FHVEEEGK[UNIMOD:56]GK[UNIMOD:56]DASGNK[UNIMOD:56]VK[UNIMOD:56]AEPAK[UNIMOD:56]IEAFR.A	sp|P00558|PGK1_HUMAN
U87MG_100ug_NHS_Rep1_5Frac_Frac-2_SII_20289_1_20289_2_1	2.01997	4.41421e-05	7.39053e-09	R.[UNIMOD:56]IYDDDFFQNLDGVANALDNVDAR.M	sp|P22314|UBA1_HUMAN
U87MG_100ug_NHS_Rep1_5Frac_Frac-4_SII_17593_1_17593_3_1	2.01988	4.41421e-05	7.39653e-09	-.[UNIMOD:56]PHIDNDVK[UNIMOD:56]LDFK[UNIMOD:56]DVLLRPK[UNIMOD:56]R.S	sp|Q9P2T1|GMPR2_HUMAN
U87MG_100ug_NHS_Rep1_5Frac_Frac-4_SII_17932_1_17932_3_1	2.01986	4.41421e-05	7.39727e-09	-.[UNIMOD:1]EEEIAALVIDNGSGMC[UNIMOD:4]K[UNIMOD:56]AGFAGDDAPR.A	sp|P63261|ACTG_HUMAN
U87MG_100ug_NHS_Rep1_5Frac_Frac-3_SII_13544_1_13544_2_1	2.01878	4.41421e-05	7.46616e-09	-.[UNIMOD:1]AVAGAVSGEPLVHWC[UNIMOD:4]TQQLR.K	sp|Q15650|TRIP4_HUMAN
U87MG_100ug_NHS_Rep1_5Frac_Frac-1_SII_19494_1_19494_3_1	2.01839	4.41421e-05	7.4908e-09	-.[UNIMOD:1]SSSPVNVK[UNIMOD:56]K[UNIMOD:56]LK[UNIMOD:56]VSELK[UNIMOD:56]EELK[UNIMOD:56]K[UNIMOD:56]R.R	sp|Q00839|HNRPU_HUMAN
U87MG_100ug_NHS_Rep1_5Frac_Frac-3_SII_9860_1_9860_3_1	2.0182	4.41421e-05	7.50279e-09	-.[UNIMOD:56]PEPTK[UNIMOD:56]SAPAPK[UNIMOD:56]K[UNIMOD:56]GSK[UNIMOD:56]K[UNIMOD:56]AVTK[UNIMOD:56]AQK[UNIMOD:56]K[UNIMOD:56]DGK[UNIMOD:56]K[UNIMOD:56]R.K	sp|P58876|H2B1D_HUMAN
U87MG_100ug_NHS_Rep1_5Frac_Frac-5_SII_16522_1_16522_2_1	2.01804	4.41421e-05	7.51286e-09	-.[UNIMOD:1]SAPLDAALHALQEEQAR.L	sp|P80217|IN35_HUMAN
U87MG_100ug_NHS_Rep1_5Frac_Frac-1_SII_10305_1_10305_2_1	2.01756	4.41421e-05	7.54406e-09	R.VAPEEHPVLLTEAPLNPK[UNIMOD:56]ANR.E	sp|P60709|ACTB_HUMAN
U87MG_100ug_NHS_Rep1_5Frac_Frac-2_SII_6118_1_6118_2_1	2.01727	4.41421e-05	7.56258e-09	-.[UNIMOD:56]AGGK[UNIMOD:56]AGK[UNIMOD:56]DSGK[UNIMOD:56]AK[UNIMOD:56]TK[UNIMOD:56]AVSR.S	sp|P0C0S5|H2AZ_HUMAN
U87MG_100ug_NHS_Rep1_5Frac_Frac-1_SII_15447_1_15447_3_1	2.01692	4.41421e-05	7.58493e-09	R.GDVVPK[UNIMOD:56]DVNAAIATIK[UNIMOD:56]TK[UNIMOD:56]R.T	sp|P68363|TBA1B_HUMAN
U87MG_100ug_NHS_Rep1_5Frac_Frac-4_SII_6176_1_6176_2_1	2.01676	4.41421e-05	7.59538e-09	-.[UNIMOD:56]AGGK[UNIMOD:56]AGK[UNIMOD:56]DSGK[UNIMOD:56]AK[UNIMOD:56]TK[UNIMOD:56]AVSR.S	sp|P0C0S5|H2AZ_HUMAN
U87MG_100ug_NHS_Rep1_5Frac_Frac-5_SII_18981_1_18981_2_1	2.01629	4.41421e-05	7.62605e-09	S.[UNIMOD:27]EAYLVGLFEDTNLC[UNIMOD:4]AIHAK[UNIMOD:56]R.V	sp|Q71DI3|H32_HUMAN
U87MG_100ug_NHS_Rep1_5Frac_Frac-5_SII_3641_1_3641_2_1	2.01618	4.41421e-05	7.63353e-09	R.[UNIMOD:56]K[UNIMOD:56]SAPATGGVK[UNIMOD:56]K[UNIMOD:56]PHR.Y	sp|Q16695|H31T_HUMAN
U87MG_100ug_NHS_Rep1_5Frac_Frac-4_SII_16920_1_16920_3_1	2.01555	4.41421e-05	7.67403e-09	-.[UNIMOD:1]DDDIAALVVDNGSGMC[UNIMOD:4]K[UNIMOD:56]AGFAGDDAPR.A	sp|P60709|ACTB_HUMAN
U87MG_100ug_NHS_Rep1_5Frac_Frac-4_SII_8815_1_8815_2_1	2.01529	4.41421e-05	7.69117e-09	R.[UNIMOD:1]HQGVM[UNIMOD:35]VGMGQK[UNIMOD:56]DSYVGDEAQSK[UNIMOD:56]R.G	sp|P60709|ACTB_HUMAN
U87MG_100ug_NHS_Rep1_5Frac_Frac-3_SII_10665_1_10665_2_1	2.015	4.41421e-05	7.71065e-09	R.[UNIMOD:27]EIQVQHPAAK[UNIMOD:56]SMIEISR.T	sp|P49368|TCPG_HUMAN
U87MG_100ug_NHS_Rep1_5Frac_Frac-3_SII_13619_1_13619_4_1	2.01467	4.41421e-05	7.73179e-09	-.[UNIMOD:1]SK[UNIMOD:56]PHSEAGTAFIQTQQLHAAM[UNIMOD:35]ADTFLEHMC[UNIMOD:4]R.L	sp|P14618|KPYM_HUMAN
U87MG_100ug_NHS_Rep1_5Frac_Frac-5_SII_2619_1_2619_3_1	2.01405	4.41421e-05	7.77311e-09	R.[UNIMOD:56]K[UNIMOD:56]SAPATGGVK[UNIMOD:56]K[UNIMOD:56]PHR.Y	sp|Q16695|H31T_HUMAN
U87MG_100ug_NHS_Rep1_5Frac_Frac-1_SII_15697_1_15697_3_1	2.01321	4.41421e-05	7.82872e-09	N.[UNIMOD:27]ERGELANEVK[UNIMOD:56]VLLQGK[UNIMOD:56]GDSEHK[UNIMOD:56]R.K	sp|P35579|MYH9_HUMAN
U87MG_100ug_NHS_Rep1_5Frac_Frac-5_SII_18400_1_18400_2_1	2.01309	4.41421e-05	7.83664e-09	R.YSDESGNMDFDNFISC[UNIMOD:4]LVR.L	sp|P04632|CPNS1_HUMAN
U87MG_100ug_NHS_Rep1_5Frac_Frac-1_SII_14165_1_14165_2_1	2.01294	4.41421e-05	7.84697e-09	R.EAGAGGLSIAVEGPSK[UNIMOD:56]AEIAFEDR.K	sp|Q14315|FLNC_HUMAN
U87MG_100ug_NHS_Rep1_5Frac_Frac-5_SII_18901_1_18901_2_1	2.01279	4.41421e-05	7.8571e-09	R.NDFQLIGIQDGYLSLLQDSGEVR.E	sp|P63241|IF5A1_HUMAN
U87MG_100ug_NHS_Rep1_5Frac_Frac-2_SII_5729_1_5729_2_1	2.01233	4.41421e-05	7.88815e-09	R.NSNLVGAAHEELQQSR.I	sp|P02545|LMNA_HUMAN
U87MG_100ug_NHS_Rep1_5Frac_Frac-3_SII_17809_1_17809_3_1	2.01217	4.41421e-05	7.89857e-09	L.[UNIMOD:27]EQQNK[UNIMOD:56]ILLAELEQLK[UNIMOD:56]GQGK[UNIMOD:56]SR.L	sp|P08670|VIME_HUMAN
U87MG_100ug_NHS_Rep1_5Frac_Frac-1_SII_10790_1_10790_2_1	2.01199	4.41421e-05	7.91102e-09	-.[UNIMOD:1]AK[UNIMOD:56]IAK[UNIMOD:56]THEDIEAQIR.E	sp|O75533|SF3B1_HUMAN
U87MG_100ug_NHS_Rep1_5Frac_Frac-4_SII_16658_1_16658_3_1	2.01187	4.41421e-05	7.91898e-09	R.FHVEEEGK[UNIMOD:56]GK[UNIMOD:56]DASGNK[UNIMOD:56]VK[UNIMOD:56]AEPAK[UNIMOD:56]IEAFR.A	sp|P00558|PGK1_HUMAN
U87MG_100ug_NHS_Rep1_5Frac_Frac-5_SII_21628_1_21628_3_1	2.01141	4.41421e-05	7.9497e-09	-.[UNIMOD:1]ASGVAVSDGVIK[UNIMOD:56]VFNDMK[UNIMOD:56]VR.K	sp|P23528|COF1_HUMAN
U87MG_100ug_NHS_Rep1_5Frac_Frac-5_SII_3969_1_3969_2_1	2.01105	4.41421e-05	7.97436e-09	R.K[UNIMOD:56]HNLC[UNIMOD:4]GETEEEK[UNIMOD:56]IR.V	sp|P46439|GSTM5_HUMAN
U87MG_100ug_NHS_Rep1_5Frac_Frac-3_SII_7783_1_7783_3_1	2.01031	4.41421e-05	8.02489e-09	R.TGDDK[UNIMOD:56]GESNDGK[UNIMOD:56]SK[UNIMOD:56]VTHVMIR.C	sp|Q06124|PTN11_HUMAN
U87MG_100ug_NHS_Rep1_5Frac_Frac-1_SII_10698_1_10698_2_1	2.01005	4.41421e-05	8.04243e-09	-.[UNIMOD:1]AK[UNIMOD:56]IAK[UNIMOD:56]THEDIEAQIR.E	sp|O75533|SF3B1_HUMAN
U87MG_100ug_NHS_Rep1_5Frac_Frac-2_SII_12869_1_12869_2_1	2.00888	4.41421e-05	8.12335e-09	R.QVQSLTC[UNIMOD:4]EVDALK[UNIMOD:56]GTNESLER.Q	sp|P08670|VIME_HUMAN
U87MG_100ug_NHS_Rep1_5Frac_Frac-1_SII_17795_1_17795_3_1	2.0086	4.41421e-05	8.1426e-09	-.[UNIMOD:56]PK[UNIMOD:56]GK[UNIMOD:56]K[UNIMOD:56]AK[UNIMOD:56]GK[UNIMOD:56]K[UNIMOD:56]VAPAPAVVK[UNIMOD:56]K[UNIMOD:56]QEAK[UNIMOD:56]K[UNIMOD:56]VVNPLFEK[UNIMOD:56]R.P	sp|P62424|RL7A_HUMAN
U87MG_100ug_NHS_Rep1_5Frac_Frac-3_SII_10217_1_10217_2_1	2.00775	4.41421e-05	8.20205e-09	R.LAK[UNIMOD:56]VDATEESDLAQQYGVR.G	sp|P07237|PDIA1_HUMAN
U87MG_100ug_NHS_Rep1_5Frac_Frac-5_SII_10519_1_10519_2_1	2.00743	4.41421e-05	8.22391e-09	-.[UNIMOD:1]MMC[UNIMOD:4]GAPSATQPATAETQHIADQVR.S	sp|P04080|CYTB_HUMAN
U87MG_100ug_NHS_Rep1_5Frac_Frac-2_SII_18516_1_18516_2_1	2.00741	4.41421e-05	8.22578e-09	-.[UNIMOD:56]PAIMTMLADHAAR.Q	sp|O14980|XPO1_HUMAN
U87MG_100ug_NHS_Rep1_5Frac_Frac-2_SII_4062_1_4062_3_1	2.00711	4.41421e-05	8.24653e-09	R.NDIASHPPVEGSYAPR.R	sp|Q7KZF4|SND1_HUMAN
U87MG_100ug_NHS_Rep1_5Frac_Frac-4_SII_13385_1_13385_3_1	2.00618	4.41421e-05	8.31229e-09	R.DEQGAC[UNIMOD:4]AVLAVHLNTLLGERPVQHR.E	sp|P40121|CAPG_HUMAN
U87MG_100ug_NHS_Rep1_5Frac_Frac-5_SII_23289_1_23289_3_1	2.00542	4.41421e-05	8.36659e-09	-.[UNIMOD:1]ASGVAVSDGVIK[UNIMOD:56]VFNDMK[UNIMOD:56]VR.K	sp|P23528|COF1_HUMAN
U87MG_100ug_NHS_Rep1_5Frac_Frac-3_SII_11198_1_11198_2_1	2.00493	4.41421e-05	8.40149e-09	R.[UNIMOD:27]ETNLDSLPLVDTHSK[UNIMOD:56]R.T	sp|P08670|VIME_HUMAN
U87MG_100ug_NHS_Rep1_5Frac_Frac-3_SII_19701_1_19701_3_1	2.00476	4.41421e-05	8.41342e-09	R.IDSLSAQLSQLQK[UNIMOD:56]QLAAK[UNIMOD:56]EAK[UNIMOD:56]LR.D	sp|P02545|LMNA_HUMAN
U87MG_100ug_NHS_Rep1_5Frac_Frac-1_SII_14733_1_14733_3_1	2.00376	4.41421e-05	8.48566e-09	S.[UNIMOD:27]EAGTAFIQTQQLHAAM[UNIMOD:35]ADTFLEHMC[UNIMOD:4]R.L	sp|P14618|KPYM_HUMAN
U87MG_100ug_NHS_Rep1_5Frac_Frac-3_SII_22220_1_22220_2_1	2.00323	4.41421e-05	8.5242e-09	R.[UNIMOD:56]GHYTIGK[UNIMOD:56]EIIDLVLDR.I	sp|P68363|TBA1B_HUMAN
U87MG_100ug_NHS_Rep1_5Frac_Frac-5_SII_21265_1_21265_3_1	2.00311	4.41421e-05	8.53231e-09	R.DFVAEPMGEK[UNIMOD:56]PVGSLAGIGEVLGK[UNIMOD:56]K[UNIMOD:56]LEER.G	sp|O75531|BAF_HUMAN
U87MG_100ug_NHS_Rep1_5Frac_Frac-4_SII_23114_1_23114_3_1	2.0027	4.41421e-05	8.56229e-09	-.[UNIMOD:1]EEEIAALVIDNGSGMC[UNIMOD:4]K[UNIMOD:56]AGFAGDDAPR.A	sp|P63261|ACTG_HUMAN
U87MG_100ug_NHS_Rep1_5Frac_Frac-3_SII_5849_1_5849_2_1	2.00257	4.41421e-05	8.57184e-09	R.NSNLVGAAHEELQQSR.I	sp|P02545|LMNA_HUMAN
U87MG_100ug_NHS_Rep1_5Frac_Frac-5_SII_4550_1_4550_2_1	2.0024	4.41421e-05	8.58469e-09	R.[UNIMOD:56]K[UNIMOD:56]K[UNIMOD:56]TATAVAHC[UNIMOD:4]K[UNIMOD:56]R.G	sp|P62249|RS16_HUMAN
U87MG_100ug_NHS_Rep1_5Frac_Frac-5_SII_11235_1_11235_3_1	2.00185	4.41421e-05	8.62508e-09	-.[UNIMOD:56]PGVTVK[UNIMOD:56]DVNQQEFVR.A	sp|P39019|RS19_HUMAN
U87MG_100ug_NHS_Rep1_5Frac_Frac-5_SII_13467_1_13467_2_1	2.00167	4.41421e-05	8.63792e-09	R.[UNIMOD:56]K[UNIMOD:56]LEVEANNAFDQYR.D	sp|P47756|CAPZB_HUMAN
U87MG_100ug_NHS_Rep1_5Frac_Frac-4_SII_14837_1_14837_3_1	2.00137	4.41421e-05	8.66043e-09	R.FHVEEEGK[UNIMOD:56]GK[UNIMOD:56]DASGNK[UNIMOD:56]VK[UNIMOD:56]AEPAK[UNIMOD:56]IEAFR.A	sp|P00558|PGK1_HUMAN
U87MG_100ug_NHS_Rep1_5Frac_Frac-5_SII_15128_1_15128_3_1	2.00098	4.41421e-05	8.68862e-09	R.[UNIMOD:56]SSFYVNGLTLGGQK[UNIMOD:56]C[UNIMOD:4]SVIR.D	sp|P07737|PROF1_HUMAN
U87MG_100ug_NHS_Rep1_5Frac_Frac-3_SII_21032_1_21032_3_1	2.00085	4.41421e-05	8.69851e-09	R.[UNIMOD:56]SATK[UNIMOD:56]VTADVINAAEK[UNIMOD:56]LQVVGR.A	sp|O43175|SERA_HUMAN
U87MG_100ug_NHS_Rep1_5Frac_Frac-2_SII_10555_1_10555_2_1	1.99998	4.41421e-05	8.76312e-09	-.[UNIMOD:1]AK[UNIMOD:56]IAK[UNIMOD:56]THEDIEAQIR.E	sp|O75533|SF3B1_HUMAN
U87MG_100ug_NHS_Rep1_5Frac_Frac-1_SII_14294_1_14294_3_1	1.9992	4.41421e-05	8.82211e-09	R.DDPSTIEK[UNIMOD:56]LAK[UNIMOD:56]NK[UNIMOD:56]QK[UNIMOD:56]PITPETAEK[UNIMOD:56]LAR.D	sp|P60953|CDC42_HUMAN
U87MG_100ug_NHS_Rep1_5Frac_Frac-2_SII_13627_1_13627_3_1	1.99917	4.41421e-05	8.82412e-09	R.[UNIMOD:28][UNIMOD:56]QILDEAGK[UNIMOD:56]VGELC[UNIMOD:4]AGK[UNIMOD:56]ER.R	sp|P18206|VINC_HUMAN
U87MG_100ug_NHS_Rep1_5Frac_Frac-4_SII_11069_1_11069_4_1	1.9991	4.41421e-05	8.82953e-09	R.FHVEEEGK[UNIMOD:56]GK[UNIMOD:56]DASGNK[UNIMOD:56]VK[UNIMOD:56]AEPAK[UNIMOD:56]IEAFR.A	sp|P00558|PGK1_HUMAN
U87MG_100ug_NHS_Rep1_5Frac_Frac-5_SII_16701_1_16701_3_1	1.99889	4.41421e-05	8.8455e-09	R.QK[UNIMOD:56]DVK[UNIMOD:56]DGK[UNIMOD:56]YSQVLANGLDNK[UNIMOD:56]LREDLER.L	sp|P62269|RS18_HUMAN
U87MG_100ug_NHS_Rep1_5Frac_Frac-5_SII_24398_1_24398_3_1	1.99883	4.41421e-05	8.84991e-09	-.[UNIMOD:1]ASGVAVSDGVIK[UNIMOD:56]VFNDMK[UNIMOD:56]VR.K	sp|P23528|COF1_HUMAN
U87MG_100ug_NHS_Rep1_5Frac_Frac-5_SII_13687_1_13687_3_1	1.99748	4.41421e-05	8.95231e-09	-.[UNIMOD:1]M[UNIMOD:35]DK[UNIMOD:56]NELVQK[UNIMOD:56]AK[UNIMOD:56]LAEQAER.Y	sp|P63104|1433Z_HUMAN
U87MG_100ug_NHS_Rep1_5Frac_Frac-1_SII_18538_1_18538_2_1	1.99708	4.41421e-05	8.98256e-09	R.GIFPVLC[UNIMOD:4]K[UNIMOD:56]DPVQEAWAEDVDLR.V	sp|P14618|KPYM_HUMAN
U87MG_100ug_NHS_Rep1_5Frac_Frac-5_SII_21502_1_21502_3_1	1.99682	4.41421e-05	9.00271e-09	-.[UNIMOD:1]AGK[UNIMOD:56]SSLFK[UNIMOD:56]VILLGDGGVGK[UNIMOD:56]SSLMNR.Y	sp|P51151|RAB9A_HUMAN
U87MG_100ug_NHS_Rep1_5Frac_Frac-5_SII_18377_1_18377_3_1	1.99679	4.41421e-05	9.00509e-09	R.[UNIMOD:56]K[UNIMOD:56]FK[UNIMOD:56]LITEDVQGK[UNIMOD:56]NC[UNIMOD:4]LTNFHGMDLTR.D	sp|P61247|RS3A_HUMAN
U87MG_100ug_NHS_Rep1_5Frac_Frac-5_SII_8879_1_8879_3_1	1.99399	4.41421e-05	9.22257e-09	K.[UNIMOD:56]SAPAPK[UNIMOD:56]K[UNIMOD:56]GSK[UNIMOD:56]K[UNIMOD:56]AVTK[UNIMOD:56]AQK[UNIMOD:56]K[UNIMOD:56]DGK[UNIMOD:56]K[UNIMOD:56]R.K	sp|P62807|H2B1C_HUMAN
U87MG_100ug_NHS_Rep1_5Frac_Frac-4_SII_21003_1_21003_3_1	1.99347	4.41421e-05	9.26354e-09	R.FHVEEEGK[UNIMOD:56]GK[UNIMOD:56]DASGNK[UNIMOD:56]VK[UNIMOD:56]AEPAK[UNIMOD:56]IEAFR.A	sp|P00558|PGK1_HUMAN
U87MG_100ug_NHS_Rep1_5Frac_Frac-2_SII_22392_1_22392_3_1	1.99211	4.41421e-05	9.37118e-09	R.TNISDEESEQATEMLVHNAQNLMQSVK[UNIMOD:56]ETVR.E	sp|P18206|VINC_HUMAN
U87MG_100ug_NHS_Rep1_5Frac_Frac-2_SII_3648_1_3648_2_1	1.99199	4.41421e-05	9.38091e-09	R.[UNIMOD:56]K[UNIMOD:56]SAPATGGVK[UNIMOD:56]K[UNIMOD:56]PHR.Y	sp|Q16695|H31T_HUMAN
U87MG_100ug_NHS_Rep1_5Frac_Frac-3_SII_11550_1_11550_2_1	1.99197	4.41421e-05	9.38253e-09	R.[UNIMOD:56]SELHIENLNMEADPGQYR.C	sp|P35613|BASI_HUMAN
U87MG_100ug_NHS_Rep1_5Frac_Frac-4_SII_16452_1_16452_3_1	1.9916	4.41421e-05	9.41226e-09	R.FHVEEEGK[UNIMOD:56]GK[UNIMOD:56]DASGNK[UNIMOD:56]VK[UNIMOD:56]AEPAK[UNIMOD:56]IEAFR.A	sp|P00558|PGK1_HUMAN
U87MG_100ug_NHS_Rep1_5Frac_Frac-5_SII_16734_1_16734_3_1	1.99106	4.41421e-05	9.45574e-09	-.[UNIMOD:1]MTMDK[UNIMOD:56]SELVQK[UNIMOD:56]AK[UNIMOD:56]LAEQAER.Y	sp|P31946|1433B_HUMAN
U87MG_100ug_NHS_Rep1_5Frac_Frac-4_SII_8959_1_8959_4_1	1.99076	4.41421e-05	9.48004e-09	R.[UNIMOD:56]HQGVMVGMGQK[UNIMOD:56]DSYVGDEAQSK[UNIMOD:56]R.G	sp|P60709|ACTB_HUMAN
U87MG_100ug_NHS_Rep1_5Frac_Frac-1_SII_16286_1_16286_3_1	1.99048	4.41421e-05	9.50226e-09	-.[UNIMOD:56]SK[UNIMOD:56]PHSEAGTAFIQTQQLHAAMADTFLEHMC[UNIMOD:4]R.L	sp|P14618|KPYM_HUMAN
U87MG_100ug_NHS_Rep1_5Frac_Frac-3_SII_15599_1_15599_3_1	1.98892	4.41421e-05	9.62914e-09	-.[UNIMOD:1]AELVQGQSAPVGM[UNIMOD:35]K[UNIMOD:56]AEGFVDALHR.V	sp|Q96I24|FUBP3_HUMAN
U87MG_100ug_NHS_Rep1_5Frac_Frac-4_SII_10664_1_10664_2_1	1.98883	4.41421e-05	9.63732e-09	R.[UNIMOD:27]ETNLDSLPLVDTHSK[UNIMOD:56]R.T	sp|P08670|VIME_HUMAN
U87MG_100ug_NHS_Rep1_5Frac_Frac-5_SII_18585_1_18585_3_1	1.98879	4.41421e-05	9.64043e-09	R.NGLSLAALK[UNIMOD:56]K[UNIMOD:56]ALAAGGYDVEK[UNIMOD:56]NNSR.I	sp|P16401|H15_HUMAN
U87MG_100ug_NHS_Rep1_5Frac_Frac-4_SII_23984_1_23984_3_1	1.98827	4.41421e-05	9.68332e-09	-.[UNIMOD:1]EEEIAALVIDNGSGMC[UNIMOD:4]K[UNIMOD:56]AGFAGDDAPR.A	sp|P63261|ACTG_HUMAN
U87MG_100ug_NHS_Rep1_5Frac_Frac-5_SII_24607_1_24607_3_1	1.98816	4.41421e-05	9.69252e-09	-.[UNIMOD:1]ASGVAVSDGVIK[UNIMOD:56]VFNDMK[UNIMOD:56]VR.K	sp|P23528|COF1_HUMAN
U87MG_100ug_NHS_Rep1_5Frac_Frac-5_SII_10552_1_10552_2_1	1.98795	4.41421e-05	9.70961e-09	-.[UNIMOD:1]AFK[UNIMOD:56]DTGK[UNIMOD:56]TPVEPEVAIHR.I	sp|P60866|RS20_HUMAN
U87MG_100ug_NHS_Rep1_5Frac_Frac-2_SII_11990_1_11990_2_1	1.98754	4.41421e-05	9.74307e-09	R.LIGDAAK[UNIMOD:56]NQLTSNPENTVFDAK[UNIMOD:56]R.L	sp|P11021|BIP_HUMAN
U87MG_100ug_NHS_Rep1_5Frac_Frac-2_SII_19463_1_19463_3_1	1.98687	4.41421e-05	9.79932e-09	R.[UNIMOD:56]STGEAFVQFASQEIAEK[UNIMOD:56]ALK[UNIMOD:56]K[UNIMOD:56]HK[UNIMOD:56]ER.I	sp|P55795|HNRH2_HUMAN
U87MG_100ug_NHS_Rep1_5Frac_Frac-5_SII_16525_1_16525_2_1	1.98676	4.41421e-05	9.80819e-09	R.[UNIMOD:56]AEEYEFLTPVEEAPK[UNIMOD:56]GMLAR.G	sp|P52565|GDIR1_HUMAN
U87MG_100ug_NHS_Rep1_5Frac_Frac-2_SII_22895_1_22895_3_1	1.986	4.41421e-05	9.87202e-09	R.[UNIMOD:56]SIATLAITTLLK[UNIMOD:56]TGSESSIDR.L	sp|Q9Y678|COPG1_HUMAN
U87MG_100ug_NHS_Rep1_5Frac_Frac-1_SII_9285_1_9285_2_1	1.98572	4.41421e-05	9.8954e-09	R.VPTANVSVVDLTC[UNIMOD:4]R.L	sp|P04406|G3P_HUMAN
U87MG_100ug_NHS_Rep1_5Frac_Frac-1_SII_11364_1_11364_2_1	1.98542	4.41421e-05	9.92134e-09	R.C[UNIMOD:4]K[UNIMOD:56]TAK[UNIMOD:56]K[UNIMOD:56]SEEEIDFLR.S	sp|Q9Y262|EIF3L_HUMAN
U87MG_100ug_NHS_Rep1_5Frac_Frac-5_SII_10699_1_10699_2_1	1.98526	4.41421e-05	9.93457e-09	R.LSEDYGVLK[UNIMOD:56]TDEGIAYR.G	sp|P32119|PRDX2_HUMAN
U87MG_100ug_NHS_Rep1_5Frac_Frac-1_SII_15394_1_15394_2_1	1.98519	4.41421e-05	9.94087e-09	R.[UNIMOD:56]DDYK[UNIMOD:56]TLINAEDPPMVVVR.K	sp|P46940|IQGA1_HUMAN
U87MG_100ug_NHS_Rep1_5Frac_Frac-2_SII_12158_1_12158_2_1	1.98464	4.41421e-05	9.98759e-09	R.PFPDGLAEDIDK[UNIMOD:56]GEVSAR.Q	sp|P13639|EF2_HUMAN
U87MG_100ug_NHS_Rep1_5Frac_Frac-4_SII_21581_1_21581_3_1	1.98461	4.41421e-05	9.99018e-09	R.ILDAAGANLK[UNIMOD:56]VISTMSVGIDHLALDEIK[UNIMOD:56]K[UNIMOD:56]R.G	sp|Q9UBQ7|GRHPR_HUMAN
U87MG_100ug_NHS_Rep1_5Frac_Frac-1_SII_17779_1_17779_3_1	1.98416	4.41421e-05	1.00287e-08	R.[UNIMOD:27]EQEVNILK[UNIMOD:56]K[UNIMOD:56]TLEEEAK[UNIMOD:56]THEAQIQEM[UNIMOD:35]R.Q	sp|P35579|MYH9_HUMAN
U87MG_100ug_NHS_Rep1_5Frac_Frac-5_SII_8944_1_8944_2_1	1.98364	4.41421e-05	1.00729e-08	R.HPHDIIDDINSGAVEC[UNIMOD:4]PAS.-	sp|P30050|RL12_HUMAN
U87MG_100ug_NHS_Rep1_5Frac_Frac-3_SII_16006_1_16006_3_1	1.98332	4.41421e-05	1.00999e-08	G.[UNIMOD:27]EVIVTK[UNIMOD:56]DDAMLLK[UNIMOD:56]GK[UNIMOD:56]GDK[UNIMOD:56]AQIEK[UNIMOD:56]R.I	sp|P10809|CH60_HUMAN
U87MG_100ug_NHS_Rep1_5Frac_Frac-5_SII_17533_1_17533_3_1	1.98305	4.41421e-05	1.01235e-08	-.[UNIMOD:1]SDAAVDTSSEITTK[UNIMOD:56]DLK[UNIMOD:56]EK[UNIMOD:56]K[UNIMOD:56]EVVEEAENGR.D	sp|P06454|PTMA_HUMAN
U87MG_100ug_NHS_Rep1_5Frac_Frac-4_SII_16509_1_16509_3_1	1.98226	4.41421e-05	1.0192e-08	R.FHVEEEGK[UNIMOD:56]GK[UNIMOD:56]DASGNK[UNIMOD:56]VK[UNIMOD:56]AEPAK[UNIMOD:56]IEAFR.A	sp|P00558|PGK1_HUMAN
U87MG_100ug_NHS_Rep1_5Frac_Frac-3_SII_18615_1_18615_3_1	1.98225	4.41421e-05	1.01931e-08	R.[UNIMOD:56]ALQASALK[UNIMOD:56]AWGGK[UNIMOD:56]K[UNIMOD:56]ENLK[UNIMOD:56]AAQEEYVK[UNIMOD:56]R.A	sp|P04075|ALDOA_HUMAN
U87MG_100ug_NHS_Rep1_5Frac_Frac-2_SII_14897_1_14897_3_1	1.9818	4.41421e-05	1.02319e-08	-.[UNIMOD:1]MEGVEEK[UNIMOD:56]K[UNIMOD:56]K[UNIMOD:56]EVPAVPETLK[UNIMOD:56]K[UNIMOD:56]K[UNIMOD:56]R.R	sp|P18124|RL7_HUMAN
U87MG_100ug_NHS_Rep1_5Frac_Frac-5_SII_8738_1_8738_4_1	1.98178	4.41421e-05	1.02336e-08	-.[UNIMOD:1]PEPAK[UNIMOD:56]SAPAPK[UNIMOD:56]K[UNIMOD:56]GSK[UNIMOD:56]K[UNIMOD:56]AVTK[UNIMOD:56]AQK[UNIMOD:56]K[UNIMOD:56]DGK[UNIMOD:56]K[UNIMOD:56]R.K	sp|P62807|H2B1C_HUMAN
U87MG_100ug_NHS_Rep1_5Frac_Frac-5_SII_22761_1_22761_3_1	1.98128	4.41421e-05	1.02777e-08	-.[UNIMOD:1]ASGVAVSDGVIK[UNIMOD:56]VFNDMK[UNIMOD:56]VR.K	sp|P23528|COF1_HUMAN
U87MG_100ug_NHS_Rep1_5Frac_Frac-3_SII_10220_1_10220_3_1	1.97965	4.41421e-05	1.04208e-08	R.VELK[UNIMOD:56]GTVRPANDFNPDADAK[UNIMOD:56]ALR.K	sp|P08133|ANXA6_HUMAN
U87MG_100ug_NHS_Rep1_5Frac_Frac-1_SII_22761_1_22761_3_1	1.97965	4.41421e-05	1.04209e-08	R.EEILAQAK[UNIMOD:56]ENEK[UNIMOD:56]K[UNIMOD:56]LK[UNIMOD:56]SMEAEMIQLQEELAAAER.A	sp|P35579|MYH9_HUMAN
U87MG_100ug_NHS_Rep1_5Frac_Frac-4_SII_23972_1_23972_3_1	1.97959	4.41421e-05	1.04263e-08	-.[UNIMOD:1]DDDIAALVVDNGSGMC[UNIMOD:4]K[UNIMOD:56]AGFAGDDAPR.A	sp|P60709|ACTB_HUMAN
U87MG_100ug_NHS_Rep1_5Frac_Frac-5_SII_8797_1_8797_3_1	1.97957	4.41421e-05	1.04282e-08	-.[UNIMOD:1]PEPAK[UNIMOD:56]SAPAPK[UNIMOD:56]K[UNIMOD:56]GSK[UNIMOD:56]K[UNIMOD:56]AVTK[UNIMOD:56]AQK[UNIMOD:56]K[UNIMOD:56]DGK[UNIMOD:56]K[UNIMOD:56]R.K	sp|P62807|H2B1C_HUMAN
U87MG_100ug_NHS_Rep1_5Frac_Frac-3_SII_14169_1_14169_3_1	1.97925	4.41421e-05	1.04567e-08	-.[UNIMOD:1]AAVQAAEVK[UNIMOD:56]VDGSEPK[UNIMOD:56]LSK[UNIMOD:56]NELK[UNIMOD:56]R.R	sp|Q15046|SYK_HUMAN
U87MG_100ug_NHS_Rep1_5Frac_Frac-1_SII_17168_1_17168_3_1	1.97902	4.41421e-05	1.04774e-08	H.[UNIMOD:56]SEAGTAFIQTQQLHAAMADTFLEHMC[UNIMOD:4]R.L	sp|P14618|KPYM_HUMAN
U87MG_100ug_NHS_Rep1_5Frac_Frac-2_SII_11780_1_11780_3_1	1.97893	4.41421e-05	1.0485e-08	R.EK[UNIMOD:56]LQEEMLQREEAENTLQSFR.Q	sp|P08670|VIME_HUMAN
U87MG_100ug_NHS_Rep1_5Frac_Frac-1_SII_16251_1_16251_3_1	1.97889	4.41421e-05	1.04887e-08	T.[UNIMOD:27]EEEEK[UNIMOD:56]SK[UNIMOD:56]SLAK[UNIMOD:56]LK[UNIMOD:56]NK[UNIMOD:56]HEAMITDLEER.L	sp|P35579|MYH9_HUMAN
U87MG_100ug_NHS_Rep1_5Frac_Frac-3_SII_15313_1_15313_3_1	1.97731	4.41421e-05	1.0631e-08	R.GDVVPK[UNIMOD:56]DVNAAIATIK[UNIMOD:56]TK[UNIMOD:56]R.T	sp|P68363|TBA1B_HUMAN
U87MG_100ug_NHS_Rep1_5Frac_Frac-1_SII_15408_1_15408_3_1	1.9765	4.41421e-05	1.07048e-08	R.GELANEVK[UNIMOD:56]VLLQGK[UNIMOD:56]GDSEHK[UNIMOD:56]R.K	sp|P35579|MYH9_HUMAN
U87MG_100ug_NHS_Rep1_5Frac_Frac-5_SII_15544_1_15544_2_1	1.97612	4.41421e-05	1.07396e-08	R.LATALQK[UNIMOD:56]LEEAEK[UNIMOD:56]AADESER.G	sp|P07951|TPM2_HUMAN
U87MG_100ug_NHS_Rep1_5Frac_Frac-5_SII_15691_1_15691_3_1	1.97595	4.41421e-05	1.07548e-08	R.[UNIMOD:56]TQK[UNIMOD:56]EIEQEAAVELSQLRDPQHDLDR.V	sp|P47985|UCRI_HUMAN
U87MG_100ug_NHS_Rep1_5Frac_Frac-5_SII_11373_1_11373_3_1	1.97589	4.41421e-05	1.07605e-08	R.NFSDNQLQEGK[UNIMOD:56]NVIGLQMGTNR.G	sp|P37802|TAGL2_HUMAN
U87MG_100ug_NHS_Rep1_5Frac_Frac-5_SII_12228_1_12228_3_1	1.97578	4.41421e-05	1.0771e-08	R.NFSDNQLQEGK[UNIMOD:56]NVIGLQMGTNR.G	sp|P37802|TAGL2_HUMAN
U87MG_100ug_NHS_Rep1_5Frac_Frac-3_SII_7763_1_7763_3_1	1.97554	4.41421e-05	1.07927e-08	R.TGDDK[UNIMOD:56]GESNDGK[UNIMOD:56]SK[UNIMOD:56]VTHVMIR.C	sp|Q06124|PTN11_HUMAN
U87MG_100ug_NHS_Rep1_5Frac_Frac-3_SII_14850_1_14850_3_1	1.97518	4.41421e-05	1.08255e-08	R.[UNIMOD:28]QLFHPEQLITGK[UNIMOD:56]EDAANNYAR.G	sp|P68363|TBA1B_HUMAN
U87MG_100ug_NHS_Rep1_5Frac_Frac-2_SII_14007_1_14007_3_1	1.97517	4.41421e-05	1.08267e-08	-.[UNIMOD:1]AAVQAAEVK[UNIMOD:56]VDGSEPK[UNIMOD:56]LSK[UNIMOD:56]NELK[UNIMOD:56]R.R	sp|Q15046|SYK_HUMAN
U87MG_100ug_NHS_Rep1_5Frac_Frac-3_SII_21792_1_21792_3_1	1.97438	4.41421e-05	1.08996e-08	R.LK[UNIMOD:56]DLEALLNSK[UNIMOD:56]EAALSTALSEK[UNIMOD:56]R.T	sp|P02545|LMNA_HUMAN
U87MG_100ug_NHS_Rep1_5Frac_Frac-5_SII_7937_1_7937_4_1	1.97414	4.41421e-05	1.09218e-08	-.[UNIMOD:1]PEPAK[UNIMOD:56]SAPAPK[UNIMOD:56]K[UNIMOD:56]GSK[UNIMOD:56]K[UNIMOD:56]AVTK[UNIMOD:56]AQK[UNIMOD:56]K[UNIMOD:56]DGK[UNIMOD:56]K[UNIMOD:56]R.K	sp|P62807|H2B1C_HUMAN
U87MG_100ug_NHS_Rep1_5Frac_Frac-4_SII_10417_1_10417_2_1	1.97408	4.41421e-05	1.09278e-08	-.[UNIMOD:1]AFK[UNIMOD:56]DTGK[UNIMOD:56]TPVEPEVAIHR.I	sp|P60866|RS20_HUMAN
U87MG_100ug_NHS_Rep1_5Frac_Frac-4_SII_18086_1_18086_3_1	1.97404	4.41421e-05	1.09317e-08	-.[UNIMOD:1]EEEIAALVIDNGSGMC[UNIMOD:4]K[UNIMOD:56]AGFAGDDAPR.A	sp|P63261|ACTG_HUMAN
U87MG_100ug_NHS_Rep1_5Frac_Frac-4_SII_18204_1_18204_3_1	1.97331	4.41421e-05	1.1e-08	R.FHVEEEGK[UNIMOD:56]GK[UNIMOD:56]DASGNK[UNIMOD:56]VK[UNIMOD:56]AEPAK[UNIMOD:56]IEAFR.A	sp|P00558|PGK1_HUMAN
U87MG_100ug_NHS_Rep1_5Frac_Frac-4_SII_10183_1_10183_2_1	1.97283	4.41421e-05	1.10447e-08	R.EM[UNIMOD:35]EENFAVEAANYQDTIGR.L	sp|P08670|VIME_HUMAN
U87MG_100ug_NHS_Rep1_5Frac_Frac-3_SII_14625_1_14625_3_1	1.97283	4.41421e-05	1.10448e-08	S.[UNIMOD:27]EAGTAFIQTQQLHAAM[UNIMOD:35]ADTFLEHMC[UNIMOD:4]R.L	sp|P14618|KPYM_HUMAN
U87MG_100ug_NHS_Rep1_5Frac_Frac-5_SII_17560_1_17560_3_1	1.97265	4.41421e-05	1.10619e-08	R.GEVAPDAK[UNIMOD:56]SFVLNLGK[UNIMOD:56]DSNNLC[UNIMOD:4]LHFNPR.F	sp|P09382|LEG1_HUMAN
U87MG_100ug_NHS_Rep1_5Frac_Frac-4_SII_12833_1_12833_3_1	1.97254	4.41421e-05	1.10719e-08	R.FHVEEEGK[UNIMOD:56]GK[UNIMOD:56]DASGNK[UNIMOD:56]VK[UNIMOD:56]AEPAK[UNIMOD:56]IEAFR.A	sp|P00558|PGK1_HUMAN
U87MG_100ug_NHS_Rep1_5Frac_Frac-2_SII_16401_1_16401_3_1	1.97242	4.41421e-05	1.10836e-08	R.[UNIMOD:56]TATESFASDPILYRPVAVALDTK[UNIMOD:56]GPEIR.T	sp|P14618|KPYM_HUMAN
U87MG_100ug_NHS_Rep1_5Frac_Frac-1_SII_18582_1_18582_3_1	1.97235	4.41421e-05	1.10905e-08	R.VEPLRNELQK[UNIMOD:56]LEDDAK[UNIMOD:56]DNQQK[UNIMOD:56]ANEVEQMIR.D	sp|Q14204|DYHC1_HUMAN
U87MG_100ug_NHS_Rep1_5Frac_Frac-2_SII_8951_1_8951_3_1	1.97177	4.41421e-05	1.11454e-08	-.[UNIMOD:1]PDPSK[UNIMOD:56]SAPAPK[UNIMOD:56]K[UNIMOD:56]GSK[UNIMOD:56]K[UNIMOD:56]AVTK[UNIMOD:56]AQK[UNIMOD:56]K[UNIMOD:56]DGK[UNIMOD:56]K[UNIMOD:56]R.K	sp|Q8N257|H2B3B_HUMAN
U87MG_100ug_NHS_Rep1_5Frac_Frac-5_SII_16472_1_16472_2_1	1.97142	4.41421e-05	1.11786e-08	R.[UNIMOD:56]DLISHDEMFSDIYK[UNIMOD:56]IR.E	sp|P13693|TCTP_HUMAN
U87MG_100ug_NHS_Rep1_5Frac_Frac-1_SII_11230_1_11230_3_1	1.97108	4.41421e-05	1.12104e-08	-.[UNIMOD:56]PDPAK[UNIMOD:56]SAPAPK[UNIMOD:56]K[UNIMOD:56]GSK[UNIMOD:56]K[UNIMOD:56]AVTK[UNIMOD:56]VQK[UNIMOD:56]K[UNIMOD:56]DGK[UNIMOD:56]K[UNIMOD:56]R.K	sp|Q5QNW6|H2B2F_HUMAN
U87MG_100ug_NHS_Rep1_5Frac_Frac-1_SII_9764_1_9764_3_1	1.97054	4.41421e-05	1.12629e-08	R.LQAALDDEEAGGRPAMEPGNGSLDLGGDSAGR.S	sp|Q00839|HNRPU_HUMAN
U87MG_100ug_NHS_Rep1_5Frac_Frac-1_SII_13045_1_13045_3_1	1.97031	4.41421e-05	1.12847e-08	R.[UNIMOD:56]GQHVPGSPFQFTVGPLGEGGAHK[UNIMOD:56]VR.A	sp|P21333|FLNA_HUMAN
U87MG_100ug_NHS_Rep1_5Frac_Frac-4_SII_18116_1_18116_3_1	1.97024	4.41421e-05	1.12917e-08	M.[UNIMOD:27]EIQEMQLK[UNIMOD:56]EAK[UNIMOD:56]HIAEEADRK[UNIMOD:56]YEEVAR.K	sp|P67936|TPM4_HUMAN
U87MG_100ug_NHS_Rep1_5Frac_Frac-2_SII_7917_1_7917_3_1	1.97023	4.41421e-05	1.12922e-08	R.[UNIMOD:56]SSK[UNIMOD:56]K[UNIMOD:56]TK[UNIMOD:56]K[UNIMOD:56]K[UNIMOD:56]K[UNIMOD:56]K[UNIMOD:56]VRPLSR.E	sp|Q5VZE5|NAA35_HUMAN
U87MG_100ug_NHS_Rep1_5Frac_Frac-5_SII_11482_1_11482_4_1	1.97023	4.41421e-05	1.12926e-08	-.[UNIMOD:1]PPK[UNIMOD:56]DDK[UNIMOD:56]K[UNIMOD:56]K[UNIMOD:56]K[UNIMOD:56]DAGK[UNIMOD:56]SAK[UNIMOD:56]K[UNIMOD:56]DK[UNIMOD:56]DPVNK[UNIMOD:56]SGGK[UNIMOD:56]AK[UNIMOD:56]K[UNIMOD:56]K[UNIMOD:56]K[UNIMOD:56]WSK[UNIMOD:56]GK[UNIMOD:56]VR.D	sp|P62851|RS25_HUMAN
U87MG_100ug_NHS_Rep1_5Frac_Frac-1_SII_2599_1_2599_3_1	1.96852	4.41421e-05	1.14576e-08	R.DTPAK[UNIMOD:56]NAQK[UNIMOD:56]SNQNGK[UNIMOD:56]DSK[UNIMOD:56]PSSTPR.S	sp|P06748|NPM_HUMAN
U87MG_100ug_NHS_Rep1_5Frac_Frac-5_SII_14403_1_14403_2_1	1.96851	4.41421e-05	1.14589e-08	R.K[UNIMOD:56]GTDVNVFNTILTTR.S	sp|P04083|ANXA1_HUMAN
U87MG_100ug_NHS_Rep1_5Frac_Frac-1_SII_5174_1_5174_2_1	1.96774	4.41421e-05	1.15347e-08	-.[UNIMOD:56]GGK[UNIMOD:56]NK[UNIMOD:56]K[UNIMOD:56]HK[UNIMOD:56]APAAAVVR.A	sp|Q7Z478|DHX29_HUMAN
U87MG_100ug_NHS_Rep1_5Frac_Frac-4_SII_17807_1_17807_3_1	1.96761	4.41421e-05	1.15471e-08	R.FHVEEEGK[UNIMOD:56]GK[UNIMOD:56]DASGNK[UNIMOD:56]VK[UNIMOD:56]AEPAK[UNIMOD:56]IEAFR.A	sp|P00558|PGK1_HUMAN
U87MG_100ug_NHS_Rep1_5Frac_Frac-3_SII_10664_1_10664_3_1	1.96572	4.41421e-05	1.17344e-08	-.[UNIMOD:1]MEVK[UNIMOD:56]GK[UNIMOD:56]K[UNIMOD:56]QFTGK[UNIMOD:56]STK[UNIMOD:56]TAQEK[UNIMOD:56]NR.F	sp|Q15397|PUM3_HUMAN
U87MG_100ug_NHS_Rep1_5Frac_Frac-5_SII_12052_1_12052_3_1	1.96564	4.41421e-05	1.17423e-08	-.[UNIMOD:56]PDPAK[UNIMOD:56]SAPAPK[UNIMOD:56]K[UNIMOD:56]GSK[UNIMOD:56]K[UNIMOD:56]AVTK[UNIMOD:56]VQK[UNIMOD:56]K[UNIMOD:56]DGK[UNIMOD:56]K[UNIMOD:56]R.K	sp|Q5QNW6|H2B2F_HUMAN
U87MG_100ug_NHS_Rep1_5Frac_Frac-3_SII_14258_1_14258_3_1	1.96475	4.41421e-05	1.1832e-08	R.K[UNIMOD:56]VLGEK[UNIMOD:56]GK[UNIMOD:56]NIK[UNIMOD:56]IISK[UNIMOD:56]IENHEGVR.R	sp|P14618|KPYM_HUMAN
U87MG_100ug_NHS_Rep1_5Frac_Frac-2_SII_3659_1_3659_2_1	1.96465	4.41421e-05	1.18425e-08	R.[UNIMOD:56]K[UNIMOD:56]SAPATGGVK[UNIMOD:56]K[UNIMOD:56]PHR.Y	sp|Q16695|H31T_HUMAN
U87MG_100ug_NHS_Rep1_5Frac_Frac-3_SII_11202_1_11202_2_1	1.96448	4.41421e-05	1.18595e-08	R.LQDEIQNMK[UNIMOD:56]EEMAR.H	sp|P08670|VIME_HUMAN
U87MG_100ug_NHS_Rep1_5Frac_Frac-4_SII_8135_1_8135_3_1	1.96438	4.41421e-05	1.18697e-08	R.THLTEDTPK[UNIMOD:56]VNADIEK[UNIMOD:56]VNQNQAK[UNIMOD:56]R.C	sp|Q15738|NSDHL_HUMAN
U87MG_100ug_NHS_Rep1_5Frac_Frac-2_SII_17429_1_17429_2_1	1.96428	4.41421e-05	1.18793e-08	R.EDLVVAPAGITLK[UNIMOD:56]EANEILQR.S	sp|P12268|IMDH2_HUMAN
U87MG_100ug_NHS_Rep1_5Frac_Frac-5_SII_4276_1_4276_2_1	1.96273	4.41421e-05	1.20376e-08	R.LNK[UNIMOD:56]HEENLK[UNIMOD:56]TK[UNIMOD:56]K[UNIMOD:56]QQR.K	sp|P42766|RL35_HUMAN
U87MG_100ug_NHS_Rep1_5Frac_Frac-4_SII_15710_1_15710_3_1	1.96264	4.41421e-05	1.20467e-08	-.[UNIMOD:1]SLSNK[UNIMOD:56]LTLDK[UNIMOD:56]LDVK[UNIMOD:56]GK[UNIMOD:56]R.V	sp|P00558|PGK1_HUMAN
U87MG_100ug_NHS_Rep1_5Frac_Frac-5_SII_6929_1_6929_2_1	1.96239	4.41421e-05	1.20725e-08	-.[UNIMOD:1]SQGDSNPAAIPHAAEDIQGDDR.W	sp|P68402|PA1B2_HUMAN
U87MG_100ug_NHS_Rep1_5Frac_Frac-1_SII_7215_1_7215_2_1	1.96224	4.41421e-05	1.20881e-08	R.TAAANAAAGAAENAFR.A	sp|O14828|SCAM3_HUMAN
U87MG_100ug_NHS_Rep1_5Frac_Frac-3_SII_2748_1_2748_2_1	1.96209	4.41421e-05	1.21033e-08	R.K[UNIMOD:56]QEESVQK[UNIMOD:56]QEAMR.R	sp|Q9NVI7|ATD3A_HUMAN
U87MG_100ug_NHS_Rep1_5Frac_Frac-4_SII_16874_1_16874_3_1	1.96193	4.41421e-05	1.21195e-08	R.FHVEEEGK[UNIMOD:56]GK[UNIMOD:56]DASGNK[UNIMOD:56]VK[UNIMOD:56]AEPAK[UNIMOD:56]IEAFR.A	sp|P00558|PGK1_HUMAN
U87MG_100ug_NHS_Rep1_5Frac_Frac-4_SII_10817_1_10817_3_1	1.96168	4.41421e-05	1.2146e-08	R.IVAPGK[UNIMOD:56]GILAADESTGSIAK[UNIMOD:56]R.L	sp|P04075|ALDOA_HUMAN
U87MG_100ug_NHS_Rep1_5Frac_Frac-5_SII_24030_1_24030_3_1	1.9616	4.41421e-05	1.2154e-08	-.[UNIMOD:1]ASGVAVSDGVIK[UNIMOD:56]VFNDMK[UNIMOD:56]VR.K	sp|P23528|COF1_HUMAN
U87MG_100ug_NHS_Rep1_5Frac_Frac-4_SII_14331_1_14331_3_1	1.96137	4.41421e-05	1.2178e-08	R.FHVEEEGK[UNIMOD:56]GK[UNIMOD:56]DASGNK[UNIMOD:56]VK[UNIMOD:56]AEPAK[UNIMOD:56]IEAFR.A	sp|P00558|PGK1_HUMAN
U87MG_100ug_NHS_Rep1_5Frac_Frac-5_SII_9795_1_9795_2_1	1.96131	4.41421e-05	1.21846e-08	R.NIELIC[UNIMOD:4]QENEGENDPVLQR.I	sp|Q15691|MARE1_HUMAN
U87MG_100ug_NHS_Rep1_5Frac_Frac-3_SII_19681_1_19681_3_1	1.96103	4.41421e-05	1.22129e-08	R.[UNIMOD:56]K[UNIMOD:56]DGNASGTTLLEALDC[UNIMOD:4]ILPPTRPTDK[UNIMOD:56]PLR.L	sp|P68104|EF1A1_HUMAN
U87MG_100ug_NHS_Rep1_5Frac_Frac-5_SII_23336_1_23336_2_1	1.96098	4.41421e-05	1.2219e-08	-.[UNIMOD:1]ASGVAVSDGVIK[UNIMOD:56]VFNDMK[UNIMOD:56]VR.K	sp|P23528|COF1_HUMAN
U87MG_100ug_NHS_Rep1_5Frac_Frac-2_SII_16584_1_16584_2_1	1.96079	4.41421e-05	1.22384e-08	R.ETVVEVPQVTWEDIGGLEDVK[UNIMOD:56]R.E	sp|P55072|TERA_HUMAN
U87MG_100ug_NHS_Rep1_5Frac_Frac-1_SII_14968_1_14968_3_1	1.96059	4.41421e-05	1.22595e-08	-.[UNIMOD:1]SK[UNIMOD:56]PHSEAGTAFIQTQQLHAAMADTFLEH.M	sp|P14618|KPYM_HUMAN
U87MG_100ug_NHS_Rep1_5Frac_Frac-4_SII_9724_1_9724_2_1	1.9602	4.41421e-05	1.23004e-08	R.NIELIC[UNIMOD:4]QENEGENDPVLQR.I	sp|Q15691|MARE1_HUMAN
U87MG_100ug_NHS_Rep1_5Frac_Frac-2_SII_13720_1_13720_3_1	1.96005	4.41421e-05	1.23158e-08	R.TEK[UNIMOD:56]K[UNIMOD:56]LK[UNIMOD:56]DVLLQVDDERR.N	sp|P35579|MYH9_HUMAN
U87MG_100ug_NHS_Rep1_5Frac_Frac-5_SII_18915_1_18915_4_1	1.9595	4.41421e-05	1.23735e-08	R.EHEK[UNIMOD:56]EVLQK[UNIMOD:56]AIEENNNFSK[UNIMOD:56]MAEEK[UNIMOD:56]LTHK[UNIMOD:56]MEANK[UNIMOD:56]ENR.E	sp|P16949|STMN1_HUMAN
U87MG_100ug_NHS_Rep1_5Frac_Frac-4_SII_16566_1_16566_3_1	1.95928	4.41421e-05	1.23972e-08	S.[UNIMOD:27]EAGTAFIQTQQLHAAMADTFLEHMC[UNIMOD:4]R.L	sp|P14618|KPYM_HUMAN
U87MG_100ug_NHS_Rep1_5Frac_Frac-4_SII_13881_1_13881_2_1	1.95915	4.41421e-05	1.24111e-08	Q.[UNIMOD:27]EQHVQIDVDVSK[UNIMOD:56]PDLTAALR.D	sp|P08670|VIME_HUMAN
U87MG_100ug_NHS_Rep1_5Frac_Frac-3_SII_17512_1_17512_3_1	1.95852	4.41421e-05	1.24777e-08	R.[UNIMOD:56]GFPTIYFSPANK[UNIMOD:56]K[UNIMOD:56]LNPK[UNIMOD:56]K[UNIMOD:56]YEGGR.E	sp|P30101|PDIA3_HUMAN
U87MG_100ug_NHS_Rep1_5Frac_Frac-3_SII_21660_1_21660_3_1	1.95839	4.41421e-05	1.24915e-08	R.TATQLAVNK[UNIMOD:56]IK[UNIMOD:56]EIAVTVK[UNIMOD:56]K[UNIMOD:56]ADK[UNIMOD:56]VEQR.K	sp|Q99832|TCPH_HUMAN
U87MG_100ug_NHS_Rep1_5Frac_Frac-3_SII_13269_1_13269_3_1	1.9582	4.41421e-05	1.25118e-08	R.EGQVEVLK[UNIMOD:56]ATEMVEVGADDDEGGAERGEAGDLR.R	sp|Q6NZI2|CAVN1_HUMAN
U87MG_100ug_NHS_Rep1_5Frac_Frac-1_SII_17375_1_17375_3_1	1.95816	4.41421e-05	1.25158e-08	S.[UNIMOD:27][UNIMOD:56]EAGTAFIQTQQLHAAMADTFLEHMC[UNIMOD:4]R.L	sp|P14618|KPYM_HUMAN
U87MG_100ug_NHS_Rep1_5Frac_Frac-4_SII_2709_1_2709_2_1	1.95776	4.41421e-05	1.25585e-08	R.K[UNIMOD:56]EGDGEAK[UNIMOD:56]SAK[UNIMOD:56]PGDDVR.E	sp|P55809|SCOT1_HUMAN
U87MG_100ug_NHS_Rep1_5Frac_Frac-3_SII_16997_1_16997_4_1	1.95722	4.41421e-05	1.26168e-08	R.[UNIMOD:56]AQHEDQVEQYK[UNIMOD:56]K[UNIMOD:56]ELEK[UNIMOD:56]TYSAK[UNIMOD:56]LDNAR.Q	sp|P02545|LMNA_HUMAN
U87MG_100ug_NHS_Rep1_5Frac_Frac-4_SII_14284_1_14284_3_1	1.95626	4.41421e-05	1.27196e-08	R.[UNIMOD:28]QHIVNDMNPGNLHLFINAYNSR.R	sp|Q92597|NDRG1_HUMAN
U87MG_100ug_NHS_Rep1_5Frac_Frac-1_SII_16697_1_16697_4_1	1.95575	4.41421e-05	1.27759e-08	-.[UNIMOD:1]SK[UNIMOD:56]PHSEAGTAFIQTQQLHAAMADTFLEHMC[UNIMOD:4]R.L	sp|P14618|KPYM_HUMAN
U87MG_100ug_NHS_Rep1_5Frac_Frac-2_SII_12045_1_12045_2_1	1.95557	4.41421e-05	1.27956e-08	R.PFPDGLAEDIDK[UNIMOD:56]GEVSAR.Q	sp|P13639|EF2_HUMAN
U87MG_100ug_NHS_Rep1_5Frac_Frac-4_SII_16439_1_16439_2_1	1.95507	4.41421e-05	1.28499e-08	-.[UNIMOD:1]DDDIAALVVDNGSGMC[UNIMOD:4]K[UNIMOD:56]AGFAGDDAPR.A	sp|P60709|ACTB_HUMAN
U87MG_100ug_NHS_Rep1_5Frac_Frac-1_SII_4377_1_4377_2_1	1.95467	4.41421e-05	1.28937e-08	R.[UNIMOD:56]ALTQTGGPHVK[UNIMOD:56]AR.V	sp|P21333|FLNA_HUMAN
U87MG_100ug_NHS_Rep1_5Frac_Frac-1_SII_16876_1_16876_3_1	1.95456	4.41421e-05	1.29052e-08	S.[UNIMOD:27]EAGTAFIQTQQLHAAMADTFLEHMC[UNIMOD:4]R.L	sp|P14618|KPYM_HUMAN
U87MG_100ug_NHS_Rep1_5Frac_Frac-2_SII_12180_1_12180_3_1	1.95447	4.41421e-05	1.29155e-08	R.[UNIMOD:28]QK[UNIMOD:56]TLEHLQLSHDQLLEVK[UNIMOD:56]R.R	sp|P52789|HXK2_HUMAN
U87MG_100ug_NHS_Rep1_5Frac_Frac-1_SII_14178_1_14178_3_1	1.95361	4.41421e-05	1.30106e-08	-.[UNIMOD:1]M[UNIMOD:35]EDLDQSPLVSSSDSPPRPQPAFK[UNIMOD:56]YQFVR.E	sp|Q9NQC3|RTN4_HUMAN
U87MG_100ug_NHS_Rep1_5Frac_Frac-5_SII_4261_1_4261_2_1	1.95337	4.41421e-05	1.30369e-08	R.TK[UNIMOD:56]SQGGEPTYNVAVGR.A	sp|P35080|PROF2_HUMAN
U87MG_100ug_NHS_Rep1_5Frac_Frac-4_SII_19197_1_19197_3_1	1.95181	4.41421e-05	1.3212e-08	R.[UNIMOD:56]K[UNIMOD:56]ASGPPVSELITK[UNIMOD:56]AVAASK[UNIMOD:56]ER.S	sp|P16403|H12_HUMAN
U87MG_100ug_NHS_Rep1_5Frac_Frac-2_SII_18507_1_18507_3_1	1.95167	4.41421e-05	1.32276e-08	Y.[UNIMOD:27]ETATLSEIK[UNIMOD:56]ALLK[UNIMOD:56]K[UNIMOD:56]HEAFESDLAAHQDR.V	sp|P12814|ACTN1_HUMAN
U87MG_100ug_NHS_Rep1_5Frac_Frac-4_SII_14821_1_14821_3_1	1.95113	4.41421e-05	1.32883e-08	R.FHVEEEGK[UNIMOD:56]GK[UNIMOD:56]DASGNK[UNIMOD:56]VK[UNIMOD:56]AEPAK[UNIMOD:56]IEAFR.A	sp|P00558|PGK1_HUMAN
U87MG_100ug_NHS_Rep1_5Frac_Frac-4_SII_23822_1_23822_3_1	1.95083	4.41421e-05	1.33221e-08	-.[UNIMOD:1]DDDIAALVVDNGSGMC[UNIMOD:4]K[UNIMOD:56]AGFAGDDAPR.A	sp|P60709|ACTB_HUMAN
U87MG_100ug_NHS_Rep1_5Frac_Frac-4_SII_7374_1_7374_2_1	1.9508	4.41421e-05	1.33258e-08	R.SEDFGVNEDLADSDAR.A	sp|P04083|ANXA1_HUMAN
U87MG_100ug_NHS_Rep1_5Frac_Frac-3_SII_15947_1_15947_2_1	1.95063	4.41421e-05	1.33458e-08	R.[UNIMOD:28]QVQSLTC[UNIMOD:4]EVDALK[UNIMOD:56]GTNESLER.Q	sp|P08670|VIME_HUMAN
U87MG_100ug_NHS_Rep1_5Frac_Frac-5_SII_8378_1_8378_2_1	1.95059	4.41421e-05	1.33504e-08	-.PGVTVK[UNIMOD:56]DVNQQEFVR.A	sp|P39019|RS19_HUMAN
U87MG_100ug_NHS_Rep1_5Frac_Frac-5_SII_10689_1_10689_2_1	1.95051	4.41421e-05	1.33585e-08	R.LSEDYGVLK[UNIMOD:56]TDEGIAYR.G	sp|P32119|PRDX2_HUMAN
U87MG_100ug_NHS_Rep1_5Frac_Frac-4_SII_9589_1_9589_2_1	1.95032	4.41421e-05	1.3381e-08	R.FGEVVDC[UNIMOD:4]TIK[UNIMOD:56]TDPVTGR.S	sp|O14979|HNRDL_HUMAN
U87MG_100ug_NHS_Rep1_5Frac_Frac-4_SII_13697_1_13697_3_1	1.9502	4.41421e-05	1.33944e-08	-.[UNIMOD:1]M[UNIMOD:35]DK[UNIMOD:56]NELVQK[UNIMOD:56]AK[UNIMOD:56]LAEQAER.Y	sp|P63104|1433Z_HUMAN
U87MG_100ug_NHS_Rep1_5Frac_Frac-4_SII_3807_1_3807_2_1	1.94982	4.41421e-05	1.34373e-08	R.[UNIMOD:56]AAHSEGNTTAGLDMR.E	sp|P78371|TCPB_HUMAN
U87MG_100ug_NHS_Rep1_5Frac_Frac-4_SII_8132_1_8132_3_1	1.94919	4.41421e-05	1.35104e-08	R.[UNIMOD:1]HQGVM[UNIMOD:35]VGMGQK[UNIMOD:56]DSYVGDEAQSK[UNIMOD:56]R.G	sp|P60709|ACTB_HUMAN
U87MG_100ug_NHS_Rep1_5Frac_Frac-2_SII_10358_1_10358_3_1	1.94874	4.41421e-05	1.35619e-08	-.[UNIMOD:1]SLK[UNIMOD:56]LQASNVTNK[UNIMOD:56]NDPK[UNIMOD:56]SINSR.V	sp|Q9UKM9|RALY_HUMAN
U87MG_100ug_NHS_Rep1_5Frac_Frac-4_SII_24434_1_24434_3_1	1.94805	4.41421e-05	1.36423e-08	-.[UNIMOD:1]EEEIAALVIDNGSGMC[UNIMOD:4]K[UNIMOD:56]AGFAGDDAPR.A	sp|P63261|ACTG_HUMAN
U87MG_100ug_NHS_Rep1_5Frac_Frac-5_SII_8372_1_8372_2_1	1.94731	4.41421e-05	1.37282e-08	R.VVSSIEQK[UNIMOD:56]TEGAEK[UNIMOD:56]K[UNIMOD:56]QQMAR.E	sp|P63104|1433Z_HUMAN
U87MG_100ug_NHS_Rep1_5Frac_Frac-1_SII_12724_1_12724_2_1	1.94717	4.41421e-05	1.37445e-08	R.[UNIMOD:56]AHIAQLC[UNIMOD:4]EK[UNIMOD:56]AGLLQR.A	sp|Q00610|CLH1_HUMAN
U87MG_100ug_NHS_Rep1_5Frac_Frac-3_SII_17487_1_17487_2_1	1.94707	4.41421e-05	1.37562e-08	R.[UNIMOD:27]EAESLIAK[UNIMOD:56]K[UNIMOD:56]IHPQTIIAGWR.E	sp|P78371|TCPB_HUMAN
U87MG_100ug_NHS_Rep1_5Frac_Frac-1_SII_14369_1_14369_3_1	1.94624	4.41421e-05	1.38546e-08	R.[UNIMOD:28]QAQQERDELADEIANSSGK[UNIMOD:56]GALALEEK[UNIMOD:56]R.R	sp|P35579|MYH9_HUMAN
U87MG_100ug_NHS_Rep1_5Frac_Frac-1_SII_19258_1_19258_2_1	1.94619	4.41421e-05	1.38605e-08	R.[UNIMOD:56]VEESTQVGGDPFPAVFGDFLGR.E	sp|Q14315|FLNC_HUMAN
U87MG_100ug_NHS_Rep1_5Frac_Frac-5_SII_10454_1_10454_2_1	1.94608	4.41421e-05	1.38729e-08	-.[UNIMOD:1]AFK[UNIMOD:56]DTGK[UNIMOD:56]TPVEPEVAIHR.I	sp|P60866|RS20_HUMAN
U87MG_100ug_NHS_Rep1_5Frac_Frac-3_SII_14205_1_14205_3_1	1.94574	4.41421e-05	1.39134e-08	R.EHNFFHLDPANVVMFEQR.L	sp|Q3KQV9|UAP1L_HUMAN
U87MG_100ug_NHS_Rep1_5Frac_Frac-2_SII_14930_1_14930_3_1	1.94477	4.41421e-05	1.40291e-08	-.[UNIMOD:1]MEGVEEK[UNIMOD:56]K[UNIMOD:56]K[UNIMOD:56]EVPAVPETLK[UNIMOD:56]K[UNIMOD:56]K[UNIMOD:56]R.R	sp|P18124|RL7_HUMAN
U87MG_100ug_NHS_Rep1_5Frac_Frac-3_SII_14900_1_14900_2_1	1.94437	4.41421e-05	1.40766e-08	R.[UNIMOD:28]QLFHPEQLITGK[UNIMOD:56]EDAANNYAR.G	sp|P68363|TBA1B_HUMAN
U87MG_100ug_NHS_Rep1_5Frac_Frac-3_SII_13939_1_13939_2_1	1.94387	4.41421e-05	1.4137e-08	N.[UNIMOD:27]EFK[UNIMOD:56]HGK[UNIMOD:56]APILIATDVASR.G	sp|P17844|DDX5_HUMAN
U87MG_100ug_NHS_Rep1_5Frac_Frac-4_SII_3263_1_3263_2_1	1.94371	4.41421e-05	1.41561e-08	-.[UNIMOD:1]AATGANAEK[UNIMOD:56]AESHNDC[UNIMOD:4]PVR.L	sp|Q16831|UPP1_HUMAN
U87MG_100ug_NHS_Rep1_5Frac_Frac-4_SII_8329_1_8329_3_1	1.9437	4.41421e-05	1.41573e-08	R.IK[UNIMOD:56]AIAAK[UNIMOD:56]HNK[UNIMOD:56]TTAQVLIR.F	sp|P15121|ALDR_HUMAN
U87MG_100ug_NHS_Rep1_5Frac_Frac-4_SII_17119_1_17119_3_1	1.94346	4.41421e-05	1.41866e-08	-.[UNIMOD:1]DDDIAALVVDNGSGMC[UNIMOD:4]K[UNIMOD:56]AGFAGDDAPR.A	sp|P60709|ACTB_HUMAN
U87MG_100ug_NHS_Rep1_5Frac_Frac-2_SII_6385_1_6385_2_1	1.94323	4.41421e-05	1.42138e-08	-.[UNIMOD:56]AAAGAAATHLEVAR.G	sp|Q96S52|PIGS_HUMAN
U87MG_100ug_NHS_Rep1_5Frac_Frac-4_SII_13859_1_13859_3_1	1.94269	4.41421e-05	1.42791e-08	R.FHVEEEGK[UNIMOD:56]GK[UNIMOD:56]DASGNK[UNIMOD:56]VK[UNIMOD:56]AEPAK[UNIMOD:56]IEAFR.A	sp|P00558|PGK1_HUMAN
U87MG_100ug_NHS_Rep1_5Frac_Frac-2_SII_7158_1_7158_3_1	1.94151	4.41421e-05	1.44239e-08	R.K[UNIMOD:56]ELK[UNIMOD:56]K[UNIMOD:56]DEGRK[UNIMOD:56]EEK[UNIMOD:56]K[UNIMOD:56]DAK[UNIMOD:56]K[UNIMOD:56]EEK[UNIMOD:56]R.K	sp|P78559|MAP1A_HUMAN
U87MG_100ug_NHS_Rep1_5Frac_Frac-1_SII_13404_1_13404_3_1	1.94111	4.41421e-05	1.44733e-08	R.[UNIMOD:56]HIGISFTPK[UNIMOD:56]EVGEHVVSVR.K	sp|Q14315|FLNC_HUMAN
U87MG_100ug_NHS_Rep1_5Frac_Frac-5_SII_14917_1_14917_3_1	1.9406	4.41421e-05	1.45366e-08	R.LVK[UNIMOD:56]EK[UNIMOD:56]VMYEK[UNIMOD:56]EAK[UNIMOD:56]QQEEK[UNIMOD:56]IEK[UNIMOD:56]MR.A	sp|O75347|TBCA_HUMAN
U87MG_100ug_NHS_Rep1_5Frac_Frac-4_SII_14747_1_14747_2_1	1.94022	4.41421e-05	1.45831e-08	R.[UNIMOD:56]QLFHPEQLITGK[UNIMOD:56]EDAANNYAR.G	sp|P68363|TBA1B_HUMAN
U87MG_100ug_NHS_Rep1_5Frac_Frac-4_SII_2598_1_2598_3_1	1.94019	4.41421e-05	1.45866e-08	R.DTPAK[UNIMOD:56]NAQK[UNIMOD:56]SNQNGK[UNIMOD:56]DSK[UNIMOD:56]PSSTPR.S	sp|P06748|NPM_HUMAN
U87MG_100ug_NHS_Rep1_5Frac_Frac-2_SII_15913_1_15913_2_1	1.93995	4.41421e-05	1.46168e-08	-.[UNIMOD:1]TAVHAGNINFK[UNIMOD:56]WDPK[UNIMOD:56]SLEIR.T	sp|P35221|CTNA1_HUMAN
U87MG_100ug_NHS_Rep1_5Frac_Frac-2_SII_10863_1_10863_2_1	1.9398	4.41421e-05	1.46355e-08	R.[UNIMOD:56]TGAVYLC[UNIMOD:4]PLTAHK[UNIMOD:56]DDC[UNIMOD:4]ER.M	sp|P26006|ITA3_HUMAN
U87MG_100ug_NHS_Rep1_5Frac_Frac-5_SII_10187_1_10187_2_1	1.93977	4.41421e-05	1.46395e-08	-.[UNIMOD:1]AFK[UNIMOD:56]DTGK[UNIMOD:56]TPVEPEVAIHR.I	sp|P60866|RS20_HUMAN
U87MG_100ug_NHS_Rep1_5Frac_Frac-4_SII_16552_1_16552_3_1	1.9396	4.41421e-05	1.4661e-08	R.FHVEEEGK[UNIMOD:56]GK[UNIMOD:56]DASGNK[UNIMOD:56]VK[UNIMOD:56]AEPAK[UNIMOD:56]IEAFR.A	sp|P00558|PGK1_HUMAN
U87MG_100ug_NHS_Rep1_5Frac_Frac-1_SII_17036_1_17036_3_1	1.9391	4.41421e-05	1.4723e-08	S.[UNIMOD:27]EAGTAFIQTQQLHAAMADTFLEHMC[UNIMOD:4]R.L	sp|P14618|KPYM_HUMAN
U87MG_100ug_NHS_Rep1_5Frac_Frac-1_SII_16651_1_16651_4_1	1.93874	4.41421e-05	1.4768e-08	-.[UNIMOD:1]SK[UNIMOD:56]PHSEAGTAFIQTQQLHAAMADTFLEHMC[UNIMOD:4]R.L	sp|P14618|KPYM_HUMAN
U87MG_100ug_NHS_Rep1_5Frac_Frac-4_SII_8726_1_8726_3_1	1.93846	4.41421e-05	1.48041e-08	R.[UNIMOD:56]THLTEDTPK[UNIMOD:56]VNADIEK[UNIMOD:56]VNQNQAK[UNIMOD:56]R.C	sp|Q15738|NSDHL_HUMAN
U87MG_100ug_NHS_Rep1_5Frac_Frac-1_SII_14399_1_14399_2_1	1.9384	4.41421e-05	1.48109e-08	R.[UNIMOD:28]QAQQERDELADEIANSSGK[UNIMOD:56]GALALEEK[UNIMOD:56]R.R	sp|P35579|MYH9_HUMAN
U87MG_100ug_NHS_Rep1_5Frac_Frac-1_SII_2431_1_2431_2_1	1.93796	4.41421e-05	1.48676e-08	R.VSQGSK[UNIMOD:56]DPAEGDGAQPEETPR.D	sp|Q14697|GANAB_HUMAN
U87MG_100ug_NHS_Rep1_5Frac_Frac-1_SII_2002_1_2002_3_1	1.93686	4.41421e-05	1.50074e-08	R.K[UNIMOD:56]TEAEERDQK[UNIMOD:56]GEK[UNIMOD:56]K[UNIMOD:56]NQK[UNIMOD:56]R.N	sp|Q14690|RRP5_HUMAN
U87MG_100ug_NHS_Rep1_5Frac_Frac-2_SII_12006_1_12006_3_1	1.93644	4.41421e-05	1.50605e-08	R.LEQYTSAIEGTK[UNIMOD:56]SAK[UNIMOD:56]PTK[UNIMOD:56]PAASDLPVPAEGVR.N	sp|Q05682|CALD1_HUMAN
U87MG_100ug_NHS_Rep1_5Frac_Frac-4_SII_7416_1_7416_3_1	1.93643	4.41421e-05	1.50617e-08	R.SHTSEGAHLDITPNSGAAGNSAGPK[UNIMOD:56]SMEVSC[UNIMOD:4].-	sp|Q92597|NDRG1_HUMAN
U87MG_100ug_NHS_Rep1_5Frac_Frac-5_SII_16538_1_16538_2_1	1.93596	4.41421e-05	1.5122e-08	R.[UNIMOD:56]AEEYEFLTPVEEAPK[UNIMOD:56]GMLAR.G	sp|P52565|GDIR1_HUMAN
U87MG_100ug_NHS_Rep1_5Frac_Frac-2_SII_4084_1_4084_3_1	1.93594	4.41421e-05	1.51252e-08	R.DHALLEEQSK[UNIMOD:56]QQSNEHLR.R	sp|O43707|ACTN4_HUMAN
U87MG_100ug_NHS_Rep1_5Frac_Frac-4_SII_18793_1_18793_2_1	1.93591	4.41421e-05	1.51287e-08	S.[UNIMOD:56]LHTDGDK[UNIMOD:56]AFVDFLSDEIK[UNIMOD:56]EER.K	sp|Q07021|C1QBP_HUMAN
U87MG_100ug_NHS_Rep1_5Frac_Frac-5_SII_12767_1_12767_2_1	1.93558	4.41421e-05	1.51718e-08	R.AEEYEFLTPVEEAPK[UNIMOD:56]GM[UNIMOD:35]LAR.G	sp|P52565|GDIR1_HUMAN
U87MG_100ug_NHS_Rep1_5Frac_Frac-3_SII_12321_1_12321_2_1	1.93522	4.41421e-05	1.52183e-08	R.[UNIMOD:56]IFHTVTTTDDPVIR.K	sp|O15371|EIF3D_HUMAN
U87MG_100ug_NHS_Rep1_5Frac_Frac-1_SII_10026_1_10026_3_1	1.93516	4.41421e-05	1.52255e-08	R.[UNIMOD:27]ENPVYEK[UNIMOD:56]K[UNIMOD:56]PK[UNIMOD:56]K[UNIMOD:56]EVK[UNIMOD:56]K[UNIMOD:56]K[UNIMOD:56]R.W	sp|P46777|RL5_HUMAN
U87MG_100ug_NHS_Rep1_5Frac_Frac-5_SII_17730_1_17730_4_1	1.93515	4.41421e-05	1.52278e-08	R.YLAEVAAGDDK[UNIMOD:56]K[UNIMOD:56]GIVDQSQQAYQEAFEISK[UNIMOD:56]K[UNIMOD:56]EMQPTHPIR.L	sp|P63104|1433Z_HUMAN
U87MG_100ug_NHS_Rep1_5Frac_Frac-4_SII_8170_1_8170_2_1	1.93487	4.41421e-05	1.52638e-08	R.K[UNIMOD:56]GVAINMVTEEDK[UNIMOD:56]R.T	sp|P60842|IF4A1_HUMAN
U87MG_100ug_NHS_Rep1_5Frac_Frac-3_SII_14800_1_14800_3_1	1.93473	4.41421e-05	1.52821e-08	-.[UNIMOD:1]AFPHRPDAPELPDFSMLK[UNIMOD:56]R.L	sp|Q9H267|VP33B_HUMAN
U87MG_100ug_NHS_Rep1_5Frac_Frac-5_SII_20477_1_20477_3_1	1.93442	4.41421e-05	1.53225e-08	N.[UNIMOD:27]ELTLADC[UNIMOD:4]NLLPK[UNIMOD:56]LHIVQVVC[UNIMOD:4]K[UNIMOD:56]K[UNIMOD:56]YR.G	sp|O00299|CLIC1_HUMAN
U87MG_100ug_NHS_Rep1_5Frac_Frac-2_SII_9617_1_9617_3_1	1.93438	4.41421e-05	1.53271e-08	R.[UNIMOD:27]ETVSEESNVLC[UNIMOD:4]LSK[UNIMOD:56]SPNK[UNIMOD:56]HNR.L	sp|P13639|EF2_HUMAN
U87MG_100ug_NHS_Rep1_5Frac_Frac-5_SII_21254_1_21254_3_1	1.93383	4.41421e-05	1.54002e-08	-.[UNIMOD:1]ASGVAVSDGVIK[UNIMOD:56]VFNDMK[UNIMOD:56]VR.K	sp|P23528|COF1_HUMAN
U87MG_100ug_NHS_Rep1_5Frac_Frac-1_SII_3750_1_3750_3_1	1.93374	4.41421e-05	1.54116e-08	R.LEEQAAQHK[UNIMOD:56]ADIEER.L	sp|Q15149|PLEC_HUMAN
U87MG_100ug_NHS_Rep1_5Frac_Frac-2_SII_8811_1_8811_2_1	1.93373	4.41421e-05	1.54125e-08	R.[UNIMOD:28]QGK[UNIMOD:56]LEAAHTLEDC[UNIMOD:4]ASR.N	sp|Q9H0B6|KLC2_HUMAN
U87MG_100ug_NHS_Rep1_5Frac_Frac-2_SII_13803_1_13803_4_1	1.93301	4.41421e-05	1.55082e-08	-.[UNIMOD:1]SK[UNIMOD:56]PHSEAGTAFIQTQQLHAAMADTFLEHM[UNIMOD:35]C[UNIMOD:4]R.L	sp|P14618|KPYM_HUMAN
U87MG_100ug_NHS_Rep1_5Frac_Frac-5_SII_10146_1_10146_3_1	1.93296	4.41421e-05	1.55146e-08	-.[UNIMOD:56]PEPAK[UNIMOD:56]FAPAPK[UNIMOD:56]K[UNIMOD:56]GSK[UNIMOD:56]K[UNIMOD:56]AVTK[UNIMOD:56]AQK[UNIMOD:56]K[UNIMOD:56]DGK[UNIMOD:56]K[UNIMOD:56]R.K	sp|Q6DN03|H2B2C_HUMAN
U87MG_100ug_NHS_Rep1_5Frac_Frac-5_SII_10295_1_10295_2_1	1.93261	4.41421e-05	1.55603e-08	R.ILENEK[UNIMOD:56]DLEEAEEYK[UNIMOD:56]EAR.L	sp|O75347|TBCA_HUMAN
U87MG_100ug_NHS_Rep1_5Frac_Frac-2_SII_19114_1_19114_2_1	1.93186	4.41421e-05	1.56601e-08	R.IYDDDFFQNLDGVANALDNVDAR.M	sp|P22314|UBA1_HUMAN
U87MG_100ug_NHS_Rep1_5Frac_Frac-4_SII_19561_1_19561_3_1	1.93167	4.41421e-05	1.56855e-08	R.[UNIMOD:28][UNIMOD:56]QTVAVGVIK[UNIMOD:56]AVDK[UNIMOD:56]K[UNIMOD:56]AAGAGK[UNIMOD:56]VTK[UNIMOD:56]SAQK[UNIMOD:56]AQK[UNIMOD:56]AK[UNIMOD:56].-	sp|P68104|EF1A1_HUMAN
U87MG_100ug_NHS_Rep1_5Frac_Frac-3_SII_14831_1_14831_3_1	1.93128	4.41421e-05	1.57375e-08	-.[UNIMOD:1]AFPHRPDAPELPDFSMLK[UNIMOD:56]R.L	sp|Q9H267|VP33B_HUMAN
U87MG_100ug_NHS_Rep1_5Frac_Frac-1_SII_14953_1_14953_2_1	1.93121	4.41421e-05	1.5748e-08	-.[UNIMOD:56]MK[UNIMOD:56]FVYK[UNIMOD:56]EEHPFEK[UNIMOD:56]R.R	sp|O95166|GBRAP_HUMAN
U87MG_100ug_NHS_Rep1_5Frac_Frac-5_SII_16510_1_16510_2_1	1.93115	4.41421e-05	1.5755e-08	R.[UNIMOD:56]DLISHDEMFSDIYK[UNIMOD:56]IR.E	sp|P13693|TCTP_HUMAN
U87MG_100ug_NHS_Rep1_5Frac_Frac-5_SII_19850_1_19850_3_1	1.93039	4.41421e-05	1.58582e-08	R.[UNIMOD:56]GFGFVTYATVEEVDAAMNARPHK[UNIMOD:56]VDGR.V	sp|P09651|ROA1_HUMAN
U87MG_100ug_NHS_Rep1_5Frac_Frac-3_SII_22092_1_22092_3_1	1.92953	4.41421e-05	1.5974e-08	-.[UNIMOD:56]MLWFQGAIPAAIATAK[UNIMOD:56]R.S	sp|Q92575|UBXN4_HUMAN
U87MG_100ug_NHS_Rep1_5Frac_Frac-1_SII_10315_1_10315_2_1	1.92943	4.41421e-05	1.59877e-08	R.VAPEEHPVLLTEAPLNPK[UNIMOD:56]ANR.E	sp|P60709|ACTB_HUMAN
U87MG_100ug_NHS_Rep1_5Frac_Frac-3_SII_2730_1_2730_2_1	1.92836	4.41421e-05	1.6135e-08	R.SHEVK[UNIMOD:56]AEGYEVAHGGR.C	sp|P53041|PPP5_HUMAN
U87MG_100ug_NHS_Rep1_5Frac_Frac-1_SII_23023_1_23023_3_1	1.92835	4.41421e-05	1.61359e-08	-.[UNIMOD:56]PELAVQK[UNIMOD:56]VVVHPLVLLSVVDHFNR.I	sp|P51665|PSMD7_HUMAN
U87MG_100ug_NHS_Rep1_5Frac_Frac-3_SII_11387_1_11387_3_1	1.92743	4.41421e-05	1.62632e-08	A.[UNIMOD:27]EITNAC[UNIMOD:4]FEPANQMVK[UNIMOD:56]C[UNIMOD:4]DPR.H	sp|P68363|TBA1B_HUMAN
U87MG_100ug_NHS_Rep1_5Frac_Frac-5_SII_12543_1_12543_2_1	1.92692	4.41421e-05	1.63342e-08	R.NFSDNQLQEGK[UNIMOD:56]NVIGLQMGTNR.G	sp|P37802|TAGL2_HUMAN
U87MG_100ug_NHS_Rep1_5Frac_Frac-1_SII_17664_1_17664_3_1	1.92586	4.41421e-05	1.6482e-08	D.[UNIMOD:27]EK[UNIMOD:56]K[UNIMOD:56]MEK[UNIMOD:56]LK[UNIMOD:56]QK[UNIMOD:56]LHTDDELNWLDHGR.T	sp|Q9Y490|TLN1_HUMAN
U87MG_100ug_NHS_Rep1_5Frac_Frac-3_SII_17084_1_17084_3_1	1.92583	4.41421e-05	1.64859e-08	R.[UNIMOD:56]AQHEDQVEQYK[UNIMOD:56]K[UNIMOD:56]ELEK[UNIMOD:56]TYSAK[UNIMOD:56]LDNAR.Q	sp|P02545|LMNA_HUMAN
U87MG_100ug_NHS_Rep1_5Frac_Frac-5_SII_13855_1_13855_2_1	1.9257	4.41421e-05	1.65051e-08	R.[UNIMOD:56]YADLTEDQLPSC[UNIMOD:4]ESLK[UNIMOD:56]DTIAR.A	sp|P18669|PGAM1_HUMAN
U87MG_100ug_NHS_Rep1_5Frac_Frac-1_SII_17096_1_17096_3_1	1.92542	4.41421e-05	1.65445e-08	M.[UNIMOD:56]PATEK[UNIMOD:56]DLAEDAPWK[UNIMOD:56]K[UNIMOD:56]IQQNTFTR.W	sp|P21333|FLNA_HUMAN
U87MG_100ug_NHS_Rep1_5Frac_Frac-4_SII_23135_1_23135_3_1	1.92534	4.41421e-05	1.65552e-08	-.[UNIMOD:1]DDDIAALVVDNGSGMC[UNIMOD:4]K[UNIMOD:56]AGFAGDDAPR.A	sp|P60709|ACTB_HUMAN
U87MG_100ug_NHS_Rep1_5Frac_Frac-5_SII_14730_1_14730_3_1	1.9253	4.41421e-05	1.65612e-08	-.[UNIMOD:1]ADDLDFETGDAGASATFPMQC[UNIMOD:4]SALR.K	sp|P63241|IF5A1_HUMAN
U87MG_100ug_NHS_Rep1_5Frac_Frac-1_SII_12866_1_12866_2_1	1.92491	4.41421e-05	1.66155e-08	R.TK[UNIMOD:56]K[UNIMOD:56]NK[UNIMOD:56]EEAAEYAK[UNIMOD:56]LLAK[UNIMOD:56]R.M	sp|P62753|RS6_HUMAN
U87MG_100ug_NHS_Rep1_5Frac_Frac-5_SII_18311_1_18311_4_1	1.92435	4.41421e-05	1.66953e-08	-.[UNIMOD:1]ASNK[UNIMOD:56]TTLQK[UNIMOD:56]MGK[UNIMOD:56]K[UNIMOD:56]QNGK[UNIMOD:56]SK[UNIMOD:56]K[UNIMOD:56]VEEAEPEEFVVEK[UNIMOD:56]VLDRR.V	sp|Q13185|CBX3_HUMAN
U87MG_100ug_NHS_Rep1_5Frac_Frac-2_SII_10530_1_10530_2_1	1.9242	4.41421e-05	1.6717e-08	-.[UNIMOD:1]AFK[UNIMOD:56]DTGK[UNIMOD:56]TPVEPEVAIHR.I	sp|P60866|RS20_HUMAN
U87MG_100ug_NHS_Rep1_5Frac_Frac-5_SII_21820_1_21820_2_1	1.92401	4.41421e-05	1.67439e-08	-.[UNIMOD:1]ASGVAVSDGVIK[UNIMOD:56]VFNDMK[UNIMOD:56]VR.K	sp|P23528|COF1_HUMAN
U87MG_100ug_NHS_Rep1_5Frac_Frac-4_SII_6143_1_6143_2_1	1.92383	4.41421e-05	1.67698e-08	-.[UNIMOD:56]AGGK[UNIMOD:56]AGK[UNIMOD:56]DSGK[UNIMOD:56]AK[UNIMOD:56]TK[UNIMOD:56]AVSR.S	sp|P0C0S5|H2AZ_HUMAN
U87MG_100ug_NHS_Rep1_5Frac_Frac-3_SII_21836_1_21836_3_1	1.9236	4.41421e-05	1.68032e-08	R.LK[UNIMOD:56]DLEALLNSK[UNIMOD:56]EAALSTALSEK[UNIMOD:56]R.T	sp|P02545|LMNA_HUMAN
U87MG_100ug_NHS_Rep1_5Frac_Frac-5_SII_9412_1_9412_3_1	1.9235	4.41421e-05	1.68172e-08	-.[UNIMOD:1]PELAK[UNIMOD:56]SAPAPK[UNIMOD:56]K[UNIMOD:56]GSK[UNIMOD:56]K[UNIMOD:56]AVTK[UNIMOD:56]AQK[UNIMOD:56]K[UNIMOD:56]DGK[UNIMOD:56]K[UNIMOD:56]R.K	sp|Q99880|H2B1L_HUMAN
U87MG_100ug_NHS_Rep1_5Frac_Frac-4_SII_4323_1_4323_2_1	1.92339	4.41421e-05	1.68321e-08	R.[UNIMOD:56]SK[UNIMOD:56]VGSTENIK[UNIMOD:56]HQPGGGR.A	sp|P27816|MAP4_HUMAN
U87MG_100ug_NHS_Rep1_5Frac_Frac-4_SII_8363_1_8363_3_1	1.92269	4.41421e-05	1.69336e-08	R.[UNIMOD:56]HQGVMVGMGQK[UNIMOD:56]DSYVGDEAQSK[UNIMOD:56]R.G	sp|P60709|ACTB_HUMAN
U87MG_100ug_NHS_Rep1_5Frac_Frac-5_SII_12661_1_12661_2_1	1.92266	4.41421e-05	1.69379e-08	R.TK[UNIMOD:56]K[UNIMOD:56]NK[UNIMOD:56]EEAAEYAK[UNIMOD:56]LLAK[UNIMOD:56]R.M	sp|P62753|RS6_HUMAN
U87MG_100ug_NHS_Rep1_5Frac_Frac-2_SII_2648_1_2648_3_1	1.92251	4.41421e-05	1.69592e-08	R.DHWK[UNIMOD:56]ESDRK[UNIMOD:56]DGK[UNIMOD:56]K[UNIMOD:56]DQDSR.S	sp|P23588|IF4B_HUMAN
U87MG_100ug_NHS_Rep1_5Frac_Frac-2_SII_18276_1_18276_3_1	1.92202	4.41421e-05	1.70301e-08	R.[UNIMOD:56]SVTLLIK[UNIMOD:56]GPNK[UNIMOD:56]HTLTQIK[UNIMOD:56]DAVR.D	sp|P40227|TCPZ_HUMAN
U87MG_100ug_NHS_Rep1_5Frac_Frac-2_SII_14193_1_14193_3_1	1.92161	4.41421e-05	1.70899e-08	R.[UNIMOD:28]QAQQERDELADEIANSSGK[UNIMOD:56]GALALEEK[UNIMOD:56]R.R	sp|P35579|MYH9_HUMAN
U87MG_100ug_NHS_Rep1_5Frac_Frac-1_SII_2654_1_2654_3_1	1.9216	4.41421e-05	1.70907e-08	R.DTPAK[UNIMOD:56]NAQK[UNIMOD:56]SNQNGK[UNIMOD:56]DSK[UNIMOD:56]PSSTPR.S	sp|P06748|NPM_HUMAN
U87MG_100ug_NHS_Rep1_5Frac_Frac-1_SII_7874_1_7874_3_1	1.9203	4.41421e-05	1.72823e-08	R.NK[UNIMOD:56]EPPAPAQQLQPQPVAVQGPEPAR.V	sp|Q9HC07|TM165_HUMAN
U87MG_100ug_NHS_Rep1_5Frac_Frac-4_SII_15820_1_15820_3_1	1.92022	4.41421e-05	1.7294e-08	-.[UNIMOD:1]SLSNK[UNIMOD:56]LTLDK[UNIMOD:56]LDVK[UNIMOD:56]GK[UNIMOD:56]R.V	sp|P00558|PGK1_HUMAN
U87MG_100ug_NHS_Rep1_5Frac_Frac-2_SII_21674_1_21674_2_1	1.92014	4.41421e-05	1.73061e-08	-.[UNIMOD:1]AAAAVVVPAEWIK[UNIMOD:56]NWEK[UNIMOD:56]SGR.G	sp|Q8NI27|THOC2_HUMAN
U87MG_100ug_NHS_Rep1_5Frac_Frac-3_SII_13974_1_13974_2_1	1.92011	4.41421e-05	1.73092e-08	N.[UNIMOD:27]EFK[UNIMOD:56]HGK[UNIMOD:56]APILIATDVASR.G	sp|P17844|DDX5_HUMAN
U87MG_100ug_NHS_Rep1_5Frac_Frac-1_SII_4388_1_4388_2_1	1.91973	4.41421e-05	1.73658e-08	R.[UNIMOD:56]ALTQTGGPHVK[UNIMOD:56]AR.V	sp|P21333|FLNA_HUMAN
U87MG_100ug_NHS_Rep1_5Frac_Frac-5_SII_14757_1_14757_2_1	1.91972	4.41421e-05	1.73673e-08	-.[UNIMOD:1]ADDLDFETGDAGASATFPMQC[UNIMOD:4]SALR.K	sp|P63241|IF5A1_HUMAN
U87MG_100ug_NHS_Rep1_5Frac_Frac-1_SII_11218_1_11218_3_1	1.91932	4.41421e-05	1.74266e-08	R.LQLEETDHQK[UNIMOD:56]NLLDEELQR.L	sp|Q15149|PLEC_HUMAN
U87MG_100ug_NHS_Rep1_5Frac_Frac-5_SII_12534_1_12534_2_1	1.91902	4.41421e-05	1.74719e-08	R.ENK[UNIMOD:56]TAVVVGTITDDVR.V	sp|Q07020|RL18_HUMAN
U87MG_100ug_NHS_Rep1_5Frac_Frac-5_SII_21234_1_21234_3_1	1.91888	4.41421e-05	1.7493e-08	-.[UNIMOD:1]C[UNIMOD:4]DFTEDQTAEFK[UNIMOD:56]EAFQLFDR.T	sp|P60660|MYL6_HUMAN
U87MG_100ug_NHS_Rep1_5Frac_Frac-4_SII_8683_1_8683_3_1	1.91884	4.41421e-05	1.7498e-08	R.[UNIMOD:56]THLTEDTPK[UNIMOD:56]VNADIEK[UNIMOD:56]VNQNQAK[UNIMOD:56]R.C	sp|Q15738|NSDHL_HUMAN
U87MG_100ug_NHS_Rep1_5Frac_Frac-2_SII_10116_1_10116_2_1	1.91842	4.41421e-05	1.75604e-08	R.VAPEEHPVLLTEAPLNPK[UNIMOD:56]ANR.E	sp|P60709|ACTB_HUMAN
U87MG_100ug_NHS_Rep1_5Frac_Frac-1_SII_12816_1_12816_2_1	1.91821	4.41421e-05	1.75925e-08	R.APLQVAVLGPTGVAEPVEVR.D	sp|Q14315|FLNC_HUMAN
U87MG_100ug_NHS_Rep1_5Frac_Frac-3_SII_7808_1_7808_2_1	1.91733	4.41421e-05	1.7725e-08	R.LEGLGSSEADQDGLASTVR.S	sp|Q07065|CKAP4_HUMAN
U87MG_100ug_NHS_Rep1_5Frac_Frac-4_SII_17613_1_17613_3_1	1.91709	4.41421e-05	1.77611e-08	L.[UNIMOD:27]EQQNK[UNIMOD:56]ILLAELEQLK[UNIMOD:56]GQGK[UNIMOD:56]SR.L	sp|P08670|VIME_HUMAN
U87MG_100ug_NHS_Rep1_5Frac_Frac-2_SII_8478_1_8478_2_1	1.9166	4.41421e-05	1.78352e-08	R.EDEEESLNEVGYDDIGGC[UNIMOD:4]R.K	sp|P55072|TERA_HUMAN
U87MG_100ug_NHS_Rep1_5Frac_Frac-4_SII_23229_1_23229_2_1	1.91646	4.41421e-05	1.78567e-08	-.[UNIMOD:1]DDDIAALVVDNGSGMC[UNIMOD:4]K[UNIMOD:56]AGFAGDDAPR.A	sp|P60709|ACTB_HUMAN
U87MG_100ug_NHS_Rep1_5Frac_Frac-1_SII_13776_1_13776_2_1	1.91539	4.41421e-05	1.802e-08	-.[UNIMOD:56]PLAK[UNIMOD:56]DLLHPSPEEEK[UNIMOD:56]R.K	sp|P42677|RS27_HUMAN
U87MG_100ug_NHS_Rep1_5Frac_Frac-3_SII_10334_1_10334_3_1	1.91488	4.41421e-05	1.80989e-08	R.HEDAQK[UNIMOD:56]AVDEMNGK[UNIMOD:56]ELNGK[UNIMOD:56]QIYVGR.A	sp|P11940|PABP1_HUMAN
U87MG_100ug_NHS_Rep1_5Frac_Frac-3_SII_17523_1_17523_3_1	1.91446	4.41421e-05	1.81636e-08	R.EDLVVAPAGITLK[UNIMOD:56]EANEILQR.S	sp|P12268|IMDH2_HUMAN
U87MG_100ug_NHS_Rep1_5Frac_Frac-1_SII_8268_1_8268_2_1	1.91405	4.41421e-05	1.82276e-08	R.K[UNIMOD:56]HIMGQNVADYMR.Y	sp|P46777|RL5_HUMAN
U87MG_100ug_NHS_Rep1_5Frac_Frac-5_SII_18226_1_18226_3_1	1.91393	4.41421e-05	1.82454e-08	R.VK[UNIMOD:56]ELK[UNIMOD:56]K[UNIMOD:56]ILDDWGETC[UNIMOD:4]K[UNIMOD:56]GC[UNIMOD:4]AEK[UNIMOD:56]SDYIR.K	sp|P55145|MANF_HUMAN
U87MG_100ug_NHS_Rep1_5Frac_Frac-3_SII_15963_1_15963_3_1	1.91323	4.41421e-05	1.83546e-08	G.[UNIMOD:27]EVIVTK[UNIMOD:56]DDAMLLK[UNIMOD:56]GK[UNIMOD:56]GDK[UNIMOD:56]AQIEK[UNIMOD:56]R.I	sp|P10809|CH60_HUMAN
U87MG_100ug_NHS_Rep1_5Frac_Frac-4_SII_5847_1_5847_3_1	1.9131	4.41421e-05	1.83755e-08	A.[UNIMOD:56]TSLGRPEEEEDELAHR.C	sp|P36551|HEM6_HUMAN
U87MG_100ug_NHS_Rep1_5Frac_Frac-3_SII_22679_1_22679_3_1	1.91295	4.41421e-05	1.83994e-08	R.[UNIMOD:56]GLK[UNIMOD:56]MSATFIGNSTAIQELFK[UNIMOD:56]R.I	sp|P68371|TBB4B_HUMAN
U87MG_100ug_NHS_Rep1_5Frac_Frac-5_SII_5775_1_5775_3_1	1.91253	4.41421e-05	1.84649e-08	-.[UNIMOD:1]SESSSK[UNIMOD:56]SSQPLASK[UNIMOD:56]QEK[UNIMOD:56]DGTEK[UNIMOD:56]R.G	sp|P17096|HMGA1_HUMAN
U87MG_100ug_NHS_Rep1_5Frac_Frac-2_SII_14273_1_14273_2_1	1.91228	4.41421e-05	1.85039e-08	R.[UNIMOD:28]QK[UNIMOD:56]ASIHEAWTDGK[UNIMOD:56]EAMLR.Q	sp|P12814|ACTN1_HUMAN
U87MG_100ug_NHS_Rep1_5Frac_Frac-4_SII_18366_1_18366_3_1	1.91224	4.41421e-05	1.851e-08	R.FHVEEEGK[UNIMOD:56]GK[UNIMOD:56]DASGNK[UNIMOD:56]VK[UNIMOD:56]AEPAK[UNIMOD:56]IEAFR.A	sp|P00558|PGK1_HUMAN
U87MG_100ug_NHS_Rep1_5Frac_Frac-1_SII_11006_1_11006_3_1	1.9114	4.41421e-05	1.86434e-08	K.[UNIMOD:27]EIGGDVQK[UNIMOD:56]HAEMVHTGLK[UNIMOD:56]LER.A	sp|Q01518|CAP1_HUMAN
U87MG_100ug_NHS_Rep1_5Frac_Frac-3_SII_15402_1_15402_3_1	1.91132	4.41421e-05	1.8656e-08	R.[UNIMOD:56]SDK[UNIMOD:56]GNEFVVIHNGIITNYK[UNIMOD:56]DLR.K	sp|O94808|GFPT2_HUMAN
U87MG_100ug_NHS_Rep1_5Frac_Frac-1_SII_18310_1_18310_3_1	1.91084	4.41421e-05	1.87335e-08	R.LEDLLQDAQDEK[UNIMOD:56]EQLNEYK[UNIMOD:56]GHLSGLAK[UNIMOD:56]R.A	sp|Q15149|PLEC_HUMAN
U87MG_100ug_NHS_Rep1_5Frac_Frac-3_SII_17743_1_17743_3_1	1.91071	4.41421e-05	1.87532e-08	L.[UNIMOD:27]EQQNK[UNIMOD:56]ILLAELEQLK[UNIMOD:56]GQGK[UNIMOD:56]SR.L	sp|P08670|VIME_HUMAN
U87MG_100ug_NHS_Rep1_5Frac_Frac-3_SII_7249_1_7249_2_1	1.91054	4.41421e-05	1.87813e-08	R.LQDEIQNMK[UNIMOD:56]EEM[UNIMOD:35]AR.H	sp|P08670|VIME_HUMAN
U87MG_100ug_NHS_Rep1_5Frac_Frac-4_SII_13614_1_13614_2_1	1.91051	4.41421e-05	1.87853e-08	T.[UNIMOD:27]ESLQAC[UNIMOD:4]K[UNIMOD:56]LAQANGWGVMVSHR.S	sp|P06733|ENOA_HUMAN
U87MG_100ug_NHS_Rep1_5Frac_Frac-1_SII_11873_1_11873_2_1	1.91032	4.41421e-05	1.88164e-08	R.LQDEIQNMK[UNIMOD:56]EEMAR.H	sp|P08670|VIME_HUMAN
U87MG_100ug_NHS_Rep1_5Frac_Frac-1_SII_12705_1_12705_2_1	1.90992	4.41421e-05	1.88807e-08	R.[UNIMOD:56]AHIAQLC[UNIMOD:4]EK[UNIMOD:56]AGLLQR.A	sp|Q00610|CLH1_HUMAN
U87MG_100ug_NHS_Rep1_5Frac_Frac-1_SII_16308_1_16308_3_1	1.90965	4.41421e-05	1.89242e-08	-.[UNIMOD:1]SK[UNIMOD:56]PHSEAGTAFIQTQQLHAAMADTFLEHMC[UNIMOD:4]R.L	sp|P14618|KPYM_HUMAN
U87MG_100ug_NHS_Rep1_5Frac_Frac-4_SII_11464_1_11464_2_1	1.90921	4.41421e-05	1.89947e-08	R.LQDEIQNMK[UNIMOD:56]EEMAR.H	sp|P08670|VIME_HUMAN
U87MG_100ug_NHS_Rep1_5Frac_Frac-2_SII_10164_1_10164_3_1	1.90921	4.41421e-05	1.89957e-08	-.[UNIMOD:1]SAADEVDGLGVARPHYGSVLDNER.L	sp|P46940|IQGA1_HUMAN
U87MG_100ug_NHS_Rep1_5Frac_Frac-5_SII_14397_1_14397_2_1	1.90896	4.41421e-05	1.90348e-08	R.K[UNIMOD:56]GTDVNVFNTILTTR.S	sp|P04083|ANXA1_HUMAN
U87MG_100ug_NHS_Rep1_5Frac_Frac-5_SII_15383_1_15383_3_1	1.90879	4.41421e-05	1.90631e-08	R.[UNIMOD:56]SHTEEDC[UNIMOD:4]TEELFDFLHAR.D	sp|P07919|QCR6_HUMAN
U87MG_100ug_NHS_Rep1_5Frac_Frac-2_SII_9785_1_9785_2_1	1.90803	4.41421e-05	1.91872e-08	R.QTNPSAMEVEEDDPVPEIR.R	sp|P55072|TERA_HUMAN
U87MG_100ug_NHS_Rep1_5Frac_Frac-4_SII_11042_1_11042_3_1	1.90781	4.41421e-05	1.92222e-08	R.AEVQK[UNIMOD:56]LQMEAPHIIVGTPGR.V	sp|P60842|IF4A1_HUMAN
U87MG_100ug_NHS_Rep1_5Frac_Frac-4_SII_22531_1_22531_3_1	1.90759	4.41421e-05	1.92589e-08	R.FHVEEEGK[UNIMOD:56]GK[UNIMOD:56]DASGNK[UNIMOD:56]VK[UNIMOD:56]AEPAK[UNIMOD:56]IEAFR.A	sp|P00558|PGK1_HUMAN
U87MG_100ug_NHS_Rep1_5Frac_Frac-4_SII_23066_1_23066_3_1	1.90662	4.41421e-05	1.94187e-08	R.FHVEEEGK[UNIMOD:56]GK[UNIMOD:56]DASGNK[UNIMOD:56]VK[UNIMOD:56]AEPAK[UNIMOD:56]IEAFR.A	sp|P00558|PGK1_HUMAN
U87MG_100ug_NHS_Rep1_5Frac_Frac-1_SII_15898_1_15898_3_1	1.90645	4.41421e-05	1.94476e-08	-.[UNIMOD:1]MEDLDQSPLVSSSDSPPRPQPAFK[UNIMOD:56]YQFVR.E	sp|Q9NQC3|RTN4_HUMAN
U87MG_100ug_NHS_Rep1_5Frac_Frac-5_SII_23037_1_23037_3_1	1.90642	4.41421e-05	1.94517e-08	R.[UNIMOD:56]GMGTALK[UNIMOD:56]LLLGAGAVAYGVR.E	sp|Q99623|PHB2_HUMAN
U87MG_100ug_NHS_Rep1_5Frac_Frac-1_SII_4425_1_4425_2_1	1.90615	4.41421e-05	1.94973e-08	R.[UNIMOD:56]ALTQTGGPHVK[UNIMOD:56]AR.V	sp|P21333|FLNA_HUMAN
U87MG_100ug_NHS_Rep1_5Frac_Frac-1_SII_8132_1_8132_2_1	1.90608	4.41421e-05	1.95082e-08	R.K[UNIMOD:56]PDTIEVQQMK[UNIMOD:56]AQAR.E	sp|P26038|MOES_HUMAN
U87MG_100ug_NHS_Rep1_5Frac_Frac-2_SII_9316_1_9316_3_1	1.90535	4.41421e-05	1.96308e-08	R.K[UNIMOD:56]K[UNIMOD:56]K[UNIMOD:56]ETDQK[UNIMOD:56]K[UNIMOD:56]EAVAPVQEESDLEK[UNIMOD:56]K[UNIMOD:56]R.R	sp|Q13409|DC1I2_HUMAN
U87MG_100ug_NHS_Rep1_5Frac_Frac-5_SII_9701_1_9701_2_1	1.90515	4.41421e-05	1.96634e-08	-.[UNIMOD:56]PEPAK[UNIMOD:56]SAPAPK[UNIMOD:56]K[UNIMOD:56]GSK[UNIMOD:56]K[UNIMOD:56]AVTK[UNIMOD:56]AQK[UNIMOD:56]K[UNIMOD:56]DGK[UNIMOD:56]K[UNIMOD:56]R.K	sp|P62807|H2B1C_HUMAN
U87MG_100ug_NHS_Rep1_5Frac_Frac-2_SII_15722_1_15722_3_1	1.90456	4.41421e-05	1.97632e-08	-.[UNIMOD:1]SLSNK[UNIMOD:56]LTLDK[UNIMOD:56]LDVK[UNIMOD:56]GK[UNIMOD:56]R.V	sp|P00558|PGK1_HUMAN
U87MG_100ug_NHS_Rep1_5Frac_Frac-5_SII_19667_1_19667_3_1	1.90397	4.41421e-05	1.98619e-08	-.[UNIMOD:1]ASGVAVSDGVIK[UNIMOD:56]VFNDMK[UNIMOD:56]VR.K	sp|P23528|COF1_HUMAN
U87MG_100ug_NHS_Rep1_5Frac_Frac-2_SII_14210_1_14210_3_1	1.90361	4.41421e-05	1.9924e-08	R.YESLTDPSK[UNIMOD:56]LDSGK[UNIMOD:56]ELHINLIPNK[UNIMOD:56]QDR.T	sp|P07900|HS90A_HUMAN
U87MG_100ug_NHS_Rep1_5Frac_Frac-4_SII_17686_1_17686_3_1	1.90348	4.41421e-05	1.99453e-08	-.[UNIMOD:56]PHIDNDVK[UNIMOD:56]LDFK[UNIMOD:56]DVLLRPK[UNIMOD:56]R.S	sp|Q9P2T1|GMPR2_HUMAN
U87MG_100ug_NHS_Rep1_5Frac_Frac-4_SII_12766_1_12766_3_1	1.90313	4.41421e-05	2.00051e-08	R.NALLSLAK[UNIMOD:56]GDRSEDFGVNEDLADSDAR.A	sp|P04083|ANXA1_HUMAN
U87MG_100ug_NHS_Rep1_5Frac_Frac-1_SII_13321_1_13321_3_1	1.90296	4.41421e-05	2.00334e-08	R.TEM[UNIMOD:35]EDLMSSK[UNIMOD:56]DDVGK[UNIMOD:56]SVHELEK[UNIMOD:56]SK[UNIMOD:56]R.A	sp|P35579|MYH9_HUMAN
U87MG_100ug_NHS_Rep1_5Frac_Frac-1_SII_8432_1_8432_4_1	1.9011	4.41421e-05	2.03539e-08	D.PAK[UNIMOD:56]SAPAPK[UNIMOD:56]K[UNIMOD:56]GSK[UNIMOD:56]K[UNIMOD:56]AVTK[UNIMOD:56]AQK[UNIMOD:56]K[UNIMOD:56]DGK[UNIMOD:56]K[UNIMOD:56]R.K	sp|P62807|H2B1C_HUMAN
U87MG_100ug_NHS_Rep1_5Frac_Frac-4_SII_14978_1_14978_2_1	1.90062	4.41421e-05	2.04369e-08	-.[UNIMOD:1]DDDIAALVVDNGSGMC[UNIMOD:4]K[UNIMOD:56]AGFAGDDAPR.A	sp|P60709|ACTB_HUMAN
U87MG_100ug_NHS_Rep1_5Frac_Frac-4_SII_13320_1_13320_3_1	1.90005	4.41421e-05	2.05379e-08	R.[UNIMOD:56]FHVEEEGK[UNIMOD:56]GK[UNIMOD:56]DASGNK[UNIMOD:56]VK[UNIMOD:56]AEPAK[UNIMOD:56]IEAFR.A	sp|P00558|PGK1_HUMAN
U87MG_100ug_NHS_Rep1_5Frac_Frac-5_SII_12647_1_12647_2_1	1.89973	4.41421e-05	2.05938e-08	R.NFSDNQLQEGK[UNIMOD:56]NVIGLQMGTNR.G	sp|P37802|TAGL2_HUMAN
U87MG_100ug_NHS_Rep1_5Frac_Frac-4_SII_2843_1_2843_3_1	1.89969	4.41421e-05	2.06009e-08	R.DTPAK[UNIMOD:56]NAQK[UNIMOD:56]SNQNGK[UNIMOD:56]DSK[UNIMOD:56]PSSTPR.S	sp|P06748|NPM_HUMAN
U87MG_100ug_NHS_Rep1_5Frac_Frac-2_SII_10280_1_10280_3_1	1.89881	4.41421e-05	2.07561e-08	R.HEDAQK[UNIMOD:56]AVDEMNGK[UNIMOD:56]ELNGK[UNIMOD:56]QIYVGR.A	sp|P11940|PABP1_HUMAN
U87MG_100ug_NHS_Rep1_5Frac_Frac-3_SII_8564_1_8564_2_1	1.89873	4.41421e-05	2.07695e-08	R.SSPVEFEC[UNIMOD:4]INEK[UNIMOD:56]K[UNIMOD:56]R.Q	sp|O75131|CPNE3_HUMAN
U87MG_100ug_NHS_Rep1_5Frac_Frac-3_SII_11682_1_11682_2_1	1.89841	4.41421e-05	2.08262e-08	R.LQDEIQNMK[UNIMOD:56]EEMAR.H	sp|P08670|VIME_HUMAN
U87MG_100ug_NHS_Rep1_5Frac_Frac-2_SII_12052_1_12052_2_1	1.89828	4.41421e-05	2.08501e-08	R.PFPDGLAEDIDK[UNIMOD:56]GEVSAR.Q	sp|P13639|EF2_HUMAN
U87MG_100ug_NHS_Rep1_5Frac_Frac-2_SII_16987_1_16987_4_1	1.89764	4.41421e-05	2.09642e-08	R.[UNIMOD:56]AQHEDQVEQYK[UNIMOD:56]K[UNIMOD:56]ELEK[UNIMOD:56]TYSAK[UNIMOD:56]LDNAR.Q	sp|P02545|LMNA_HUMAN
U87MG_100ug_NHS_Rep1_5Frac_Frac-5_SII_22978_1_22978_3_1	1.89758	4.41421e-05	2.09747e-08	-.[UNIMOD:1]ASGVAVSDGVIK[UNIMOD:56]VFNDMK[UNIMOD:56]VR.K	sp|P23528|COF1_HUMAN
U87MG_100ug_NHS_Rep1_5Frac_Frac-5_SII_22016_1_22016_2_1	1.89686	4.41421e-05	2.11035e-08	-.[UNIMOD:56]MK[UNIMOD:56]PLVVFVLGGPGAGK[UNIMOD:56]GTQC[UNIMOD:4]AR.I	sp|P30085|KCY_HUMAN
U87MG_100ug_NHS_Rep1_5Frac_Frac-2_SII_19307_1_19307_2_1	1.89668	4.41421e-05	2.11363e-08	R.[UNIMOD:56]SK[UNIMOD:56]TNK[UNIMOD:56]AK[UNIMOD:56]TLATWATK[UNIMOD:56]ELR.K	sp|Q14974|IMB1_HUMAN
U87MG_100ug_NHS_Rep1_5Frac_Frac-1_SII_14177_1_14177_2_1	1.89622	4.41421e-05	2.12194e-08	R.EAGAGGLSIAVEGPSK[UNIMOD:56]AEIAFEDR.K	sp|Q14315|FLNC_HUMAN
U87MG_100ug_NHS_Rep1_5Frac_Frac-1_SII_15360_1_15360_2_1	1.89525	4.41421e-05	2.13942e-08	R.LQQELDDLLVDLDHQR.Q	sp|P35579|MYH9_HUMAN
U87MG_100ug_NHS_Rep1_5Frac_Frac-4_SII_15499_1_15499_3_1	1.8952	4.41421e-05	2.14037e-08	-.[UNIMOD:1]SLSNK[UNIMOD:56]LTLDK[UNIMOD:56]LDVK[UNIMOD:56]GK[UNIMOD:56]R.V	sp|P00558|PGK1_HUMAN
U87MG_100ug_NHS_Rep1_5Frac_Frac-1_SII_16417_1_16417_2_1	1.89508	4.41421e-05	2.14267e-08	R.IIGLDQVAGMSETALPGAFK[UNIMOD:56]TR.K	sp|P35579|MYH9_HUMAN
U87MG_100ug_NHS_Rep1_5Frac_Frac-3_SII_14664_1_14664_3_1	1.89493	4.41421e-05	2.14524e-08	S.[UNIMOD:27]EAGTAFIQTQQLHAAM[UNIMOD:35]ADTFLEHMC[UNIMOD:4]R.L	sp|P14618|KPYM_HUMAN
U87MG_100ug_NHS_Rep1_5Frac_Frac-5_SII_7804_1_7804_2_1	1.89491	4.41421e-05	2.14569e-08	R.[UNIMOD:56]ASGNYATVISHNPETK[UNIMOD:56]K[UNIMOD:56]TR.V	sp|P62917|RL8_HUMAN
U87MG_100ug_NHS_Rep1_5Frac_Frac-3_SII_11125_1_11125_3_1	1.89487	4.41421e-05	2.14634e-08	-.[UNIMOD:56]PDPAK[UNIMOD:56]SAPAPK[UNIMOD:56]K[UNIMOD:56]GSK[UNIMOD:56]K[UNIMOD:56]AVTK[UNIMOD:56]VQK[UNIMOD:56]K[UNIMOD:56]DGK[UNIMOD:56]K[UNIMOD:56]R.K	sp|Q5QNW6|H2B2F_HUMAN
U87MG_100ug_NHS_Rep1_5Frac_Frac-5_SII_13373_1_13373_3_1	1.89401	4.41421e-05	2.16227e-08	R.YDDMAAAMK[UNIMOD:56]AVTEQGHELSNEER.N	sp|P31946|1433B_HUMAN
U87MG_100ug_NHS_Rep1_5Frac_Frac-4_SII_23909_1_23909_3_1	1.89372	4.41421e-05	2.16759e-08	-.[UNIMOD:1]EEEIAALVIDNGSGMC[UNIMOD:4]K[UNIMOD:56]AGFAGDDAPR.A	sp|P63261|ACTG_HUMAN
U87MG_100ug_NHS_Rep1_5Frac_Frac-1_SII_14224_1_14224_2_1	1.89331	4.41421e-05	2.17524e-08	R.EAGAGGLSIAVEGPSK[UNIMOD:56]AEIAFEDR.K	sp|Q14315|FLNC_HUMAN
U87MG_100ug_NHS_Rep1_5Frac_Frac-5_SII_6234_1_6234_2_1	1.89282	4.41421e-05	2.18423e-08	-.[UNIMOD:56]AGGK[UNIMOD:56]AGK[UNIMOD:56]DSGK[UNIMOD:56]AK[UNIMOD:56]TK[UNIMOD:56]AVSR.S	sp|P0C0S5|H2AZ_HUMAN
U87MG_100ug_NHS_Rep1_5Frac_Frac-4_SII_10380_1_10380_2_1	1.89215	4.41421e-05	2.19671e-08	-.[UNIMOD:1]AFK[UNIMOD:56]DTGK[UNIMOD:56]TPVEPEVAIHR.I	sp|P60866|RS20_HUMAN
U87MG_100ug_NHS_Rep1_5Frac_Frac-4_SII_11216_1_11216_2_1	1.89042	4.41421e-05	2.22931e-08	R.EMEENFAVEAANYQDTIGR.L	sp|P08670|VIME_HUMAN
U87MG_100ug_NHS_Rep1_5Frac_Frac-4_SII_16619_1_16619_3_1	1.89012	4.41421e-05	2.23518e-08	R.FHVEEEGK[UNIMOD:56]GK[UNIMOD:56]DASGNK[UNIMOD:56]VK[UNIMOD:56]AEPAK[UNIMOD:56]IEAFR.A	sp|P00558|PGK1_HUMAN
U87MG_100ug_NHS_Rep1_5Frac_Frac-3_SII_14283_1_14283_3_1	1.88994	4.41421e-05	2.2386e-08	R.[UNIMOD:28]QAQQERDELADEIANSSGK[UNIMOD:56]GALALEEK[UNIMOD:56]R.R	sp|P35579|MYH9_HUMAN
U87MG_100ug_NHS_Rep1_5Frac_Frac-2_SII_20970_1_20970_3_1	1.88977	4.41421e-05	2.24168e-08	R.[UNIMOD:56]SNGAIQK[UNIMOD:56]IVAFENAFER.L	sp|O60763|USO1_HUMAN
U87MG_100ug_NHS_Rep1_5Frac_Frac-5_SII_6075_1_6075_3_1	1.88968	4.41421e-05	2.24358e-08	R.TQK[UNIMOD:56]TGGADQSLQQGEGSK[UNIMOD:56]K[UNIMOD:56]GK[UNIMOD:56]GK[UNIMOD:56]K[UNIMOD:56]K[UNIMOD:56]K[UNIMOD:56].-	sp|P09132|SRP19_HUMAN
U87MG_100ug_NHS_Rep1_5Frac_Frac-4_SII_17646_1_17646_3_1	1.88956	4.41421e-05	2.24584e-08	L.[UNIMOD:27]EQQNK[UNIMOD:56]ILLAELEQLK[UNIMOD:56]GQGK[UNIMOD:56]SR.L	sp|P08670|VIME_HUMAN
U87MG_100ug_NHS_Rep1_5Frac_Frac-5_SII_18948_1_18948_4_1	1.88875	4.41421e-05	2.26132e-08	R.EHEK[UNIMOD:56]EVLQK[UNIMOD:56]AIEENNNFSK[UNIMOD:56]MAEEK[UNIMOD:56]LTHK[UNIMOD:56]MEANK[UNIMOD:56]ENR.E	sp|P16949|STMN1_HUMAN
U87MG_100ug_NHS_Rep1_5Frac_Frac-4_SII_10171_1_10171_2_1	1.88864	4.41421e-05	2.26338e-08	R.C[UNIMOD:4]AQYK[UNIMOD:56]K[UNIMOD:56]DGADFAK[UNIMOD:56]WR.C	sp|P09972|ALDOC_HUMAN
U87MG_100ug_NHS_Rep1_5Frac_Frac-5_SII_5193_1_5193_3_1	1.88793	4.41421e-05	2.27714e-08	K.GSK[UNIMOD:56]K[UNIMOD:56]AVTK[UNIMOD:56]AQK[UNIMOD:56]K[UNIMOD:56]DGK[UNIMOD:56]K[UNIMOD:56]R.K	sp|P62807|H2B1C_HUMAN
U87MG_100ug_NHS_Rep1_5Frac_Frac-5_SII_5721_1_5721_3_1	1.88769	4.41421e-05	2.28192e-08	-.[UNIMOD:1]SESSSK[UNIMOD:56]SSQPLASK[UNIMOD:56]QEK[UNIMOD:56]DGTEK[UNIMOD:56]R.G	sp|P17096|HMGA1_HUMAN
U87MG_100ug_NHS_Rep1_5Frac_Frac-4_SII_19437_1_19437_3_1	1.88749	4.41421e-05	2.28582e-08	R.TLK[UNIMOD:56]LATPTYGDLNHLVSATMSGVTTSLR.F	sp|Q13509|TBB3_HUMAN
U87MG_100ug_NHS_Rep1_5Frac_Frac-2_SII_9307_1_9307_4_1	1.88738	4.41421e-05	2.28787e-08	R.NK[UNIMOD:56]TK[UNIMOD:56]EK[UNIMOD:56]GK[UNIMOD:56]NENSEC[UNIMOD:4]PK[UNIMOD:56]K[UNIMOD:56]EPK[UNIMOD:56]AK[UNIMOD:56]K[UNIMOD:56]AK[UNIMOD:56]VADK[UNIMOD:56]K[UNIMOD:56]AR.L	sp|Q9NW13|RBM28_HUMAN
U87MG_100ug_NHS_Rep1_5Frac_Frac-4_SII_20506_1_20506_3_1	1.88735	4.41421e-05	2.28851e-08	H.[UNIMOD:56]GIVTNWDDMEK[UNIMOD:56]IWHHTFYNELR.V	sp|P60709|ACTB_HUMAN
U87MG_100ug_NHS_Rep1_5Frac_Frac-3_SII_19850_1_19850_3_1	1.88671	4.41421e-05	2.301e-08	-.[UNIMOD:1]ASGVAVSDGVIK[UNIMOD:56]VFNDMK[UNIMOD:56]VR.K	sp|P23528|COF1_HUMAN
U87MG_100ug_NHS_Rep1_5Frac_Frac-5_SII_11252_1_11252_2_1	1.88637	4.41421e-05	2.30759e-08	R.[UNIMOD:56]NGYELSPTAAANFTR.R	sp|P49721|PSB2_HUMAN
U87MG_100ug_NHS_Rep1_5Frac_Frac-4_SII_18604_1_18604_3_1	1.88593	4.41421e-05	2.31641e-08	-.[UNIMOD:1]DDDIAALVVDNGSGMC[UNIMOD:4]K[UNIMOD:56]AGFAGDDAPR.A	sp|P60709|ACTB_HUMAN
U87MG_100ug_NHS_Rep1_5Frac_Frac-3_SII_10958_1_10958_3_1	1.88589	4.41421e-05	2.31705e-08	K.[UNIMOD:27]EIGGDVQK[UNIMOD:56]HAEMVHTGLK[UNIMOD:56]LER.A	sp|Q01518|CAP1_HUMAN
U87MG_100ug_NHS_Rep1_5Frac_Frac-3_SII_3703_1_3703_2_1	1.8858	4.41421e-05	2.31897e-08	R.[UNIMOD:28][UNIMOD:56]QAGEVTYADAHK[UNIMOD:56]ER.T	sp|Q13247|SRSF6_HUMAN
U87MG_100ug_NHS_Rep1_5Frac_Frac-3_SII_14787_1_14787_3_1	1.88562	4.41421e-05	2.32256e-08	-.[UNIMOD:1]AFPHRPDAPELPDFSMLK[UNIMOD:56]R.L	sp|Q9H267|VP33B_HUMAN
U87MG_100ug_NHS_Rep1_5Frac_Frac-3_SII_16017_1_16017_3_1	1.88503	4.41421e-05	2.33417e-08	R.AQHEDQVEQYK[UNIMOD:56]K[UNIMOD:56]ELEK[UNIMOD:56]TYSAK[UNIMOD:56]LDNAR.Q	sp|P02545|LMNA_HUMAN
U87MG_100ug_NHS_Rep1_5Frac_Frac-2_SII_13049_1_13049_3_1	1.88502	4.41421e-05	2.33435e-08	R.[UNIMOD:56]AAVGRPLDK[UNIMOD:56]HEGALETLLR.Y	sp|Q8WUM4|PDC6I_HUMAN
U87MG_100ug_NHS_Rep1_5Frac_Frac-3_SII_13967_1_13967_4_1	1.88463	4.41421e-05	2.34213e-08	-.[UNIMOD:1]SK[UNIMOD:56]PHSEAGTAFIQTQQLHAAMADTFLEHM[UNIMOD:35]C[UNIMOD:4]R.L	sp|P14618|KPYM_HUMAN
U87MG_100ug_NHS_Rep1_5Frac_Frac-5_SII_10168_1_10168_3_1	1.8845	4.41421e-05	2.34474e-08	-.[UNIMOD:56]PEPAK[UNIMOD:56]FAPAPK[UNIMOD:56]K[UNIMOD:56]GSK[UNIMOD:56]K[UNIMOD:56]AVTK[UNIMOD:56]AQK[UNIMOD:56]K[UNIMOD:56]DGK[UNIMOD:56]K[UNIMOD:56]R.K	sp|Q6DN03|H2B2C_HUMAN
U87MG_100ug_NHS_Rep1_5Frac_Frac-1_SII_16703_1_16703_3_1	1.88414	4.41421e-05	2.35206e-08	A.[UNIMOD:27]EAK[UNIMOD:56]AK[UNIMOD:56]ALK[UNIMOD:56]AK[UNIMOD:56]K[UNIMOD:56]AVLK[UNIMOD:56]GVHSHK[UNIMOD:56]K[UNIMOD:56]K[UNIMOD:56]K[UNIMOD:56]IR.T	sp|P62750|RL23A_HUMAN
U87MG_100ug_NHS_Rep1_5Frac_Frac-4_SII_10381_1_10381_2_1	1.88397	4.41421e-05	2.35547e-08	R.AHQVVEDGYEFFAK[UNIMOD:56]R.Q	sp|P62140|PP1B_HUMAN
U87MG_100ug_NHS_Rep1_5Frac_Frac-3_SII_20348_1_20348_2_1	1.88394	4.41421e-05	2.35607e-08	R.GHYTIGK[UNIMOD:56]EIIDLVLDR.I	sp|P68363|TBA1B_HUMAN
U87MG_100ug_NHS_Rep1_5Frac_Frac-1_SII_15439_1_15439_2_1	1.88348	4.41421e-05	2.36515e-08	R.GDVVPK[UNIMOD:56]DVNAAIATIK[UNIMOD:56]TK[UNIMOD:56]R.T	sp|P68363|TBA1B_HUMAN
U87MG_100ug_NHS_Rep1_5Frac_Frac-1_SII_5139_1_5139_2_1	1.88347	4.41421e-05	2.36545e-08	R.[UNIMOD:28][UNIMOD:56]QLAEAHAQAK[UNIMOD:56]AQAER.E	sp|Q15149|PLEC_HUMAN
U87MG_100ug_NHS_Rep1_5Frac_Frac-5_SII_19473_1_19473_2_1	1.88317	4.41421e-05	2.37146e-08	-.[UNIMOD:56]MIK[UNIMOD:56]AILIFNNHGK[UNIMOD:56]PR.L	sp|Q92572|AP3S1_HUMAN
U87MG_100ug_NHS_Rep1_5Frac_Frac-5_SII_19518_1_19518_3_1	1.88311	4.41421e-05	2.37262e-08	R.[UNIMOD:56]STGEAFVQFASQEIAEK[UNIMOD:56]ALK[UNIMOD:56]K[UNIMOD:56]HK[UNIMOD:56]ER.I	sp|P55795|HNRH2_HUMAN
U87MG_100ug_NHS_Rep1_5Frac_Frac-5_SII_20256_1_20256_3_1	1.88286	4.41421e-05	2.37766e-08	-.[UNIMOD:1]VEADRPGK[UNIMOD:56]LFIGGLNTETNEK[UNIMOD:56]ALEAVFGK[UNIMOD:56]YGR.I	sp|P38159|RBMX_HUMAN
U87MG_100ug_NHS_Rep1_5Frac_Frac-4_SII_12305_1_12305_3_1	1.88233	4.41421e-05	2.38854e-08	R.FHVEEEGK[UNIMOD:56]GK[UNIMOD:56]DASGNK[UNIMOD:56]VK[UNIMOD:56]AEPAK[UNIMOD:56]IEAFR.A	sp|P00558|PGK1_HUMAN
U87MG_100ug_NHS_Rep1_5Frac_Frac-5_SII_13707_1_13707_2_1	1.88229	4.41421e-05	2.38932e-08	R.[UNIMOD:56]YDDMAAC[UNIMOD:4]MK[UNIMOD:56]SVTEQGAELSNEER.N	sp|P63104|1433Z_HUMAN
U87MG_100ug_NHS_Rep1_5Frac_Frac-1_SII_5279_1_5279_2_1	1.8822	4.41421e-05	2.39109e-08	R.IVEDEPNK[UNIMOD:56]IC[UNIMOD:4]EADR.V	sp|P55060|XPO2_HUMAN
U87MG_100ug_NHS_Rep1_5Frac_Frac-1_SII_22183_1_22183_3_1	1.8822	4.41421e-05	2.3911e-08	R.LTEMETLQSQLMAEK[UNIMOD:56]LQLQEQLQAETELC[UNIMOD:4]AEAEELR.A	sp|P35579|MYH9_HUMAN
U87MG_100ug_NHS_Rep1_5Frac_Frac-4_SII_22752_1_22752_3_1	1.88196	4.41421e-05	2.39611e-08	-.[UNIMOD:1]AAGAAEAAVAAVEEVGSAGQFEELLR.L	sp|O76003|GLRX3_HUMAN
U87MG_100ug_NHS_Rep1_5Frac_Frac-2_SII_18085_1_18085_2_1	1.88184	4.41421e-05	2.39848e-08	-.[UNIMOD:56]PAIMTMLADHAAR.Q	sp|O14980|XPO1_HUMAN
U87MG_100ug_NHS_Rep1_5Frac_Frac-5_SII_12709_1_12709_2_1	1.88077	4.41421e-05	2.42039e-08	R.YADLTEDQLPSC[UNIMOD:4]ESLK[UNIMOD:56]DTIAR.A	sp|P18669|PGAM1_HUMAN
U87MG_100ug_NHS_Rep1_5Frac_Frac-2_SII_10260_1_10260_3_1	1.88067	4.41421e-05	2.4226e-08	S.[UNIMOD:27]EC[UNIMOD:4]EEQAK[UNIMOD:56]AAK[UNIMOD:56]K[UNIMOD:56]GMWSEGNGSHTIR.D	sp|Q7KZF4|SND1_HUMAN
U87MG_100ug_NHS_Rep1_5Frac_Frac-2_SII_2288_1_2288_2_1	1.88063	4.41421e-05	2.42345e-08	R.VSQGSK[UNIMOD:56]DPAEGDGAQPEETPR.D	sp|Q14697|GANAB_HUMAN
U87MG_100ug_NHS_Rep1_5Frac_Frac-5_SII_10269_1_10269_3_1	1.88048	4.41421e-05	2.42645e-08	R.K[UNIMOD:56]AK[UNIMOD:56]K[UNIMOD:56]EAPPMEK[UNIMOD:56]PEVVK[UNIMOD:56]THLR.D	sp|P62841|RS15_HUMAN
U87MG_100ug_NHS_Rep1_5Frac_Frac-5_SII_3309_1_3309_2_1	1.88046	4.41421e-05	2.42692e-08	-.[UNIMOD:1]AATGANAEK[UNIMOD:56]AESHNDC[UNIMOD:4]PVR.L	sp|Q16831|UPP1_HUMAN
U87MG_100ug_NHS_Rep1_5Frac_Frac-5_SII_24435_1_24435_2_1	1.8804	4.41421e-05	2.42809e-08	-.[UNIMOD:1]ASGVAVSDGVIK[UNIMOD:56]VFNDMK[UNIMOD:56]VR.K	sp|P23528|COF1_HUMAN
U87MG_100ug_NHS_Rep1_5Frac_Frac-5_SII_12152_1_12152_2_1	1.88003	4.41421e-05	2.43588e-08	-.[UNIMOD:1]MHSLATAAPVPTTLAQVDR.E	sp|Q92600|CNOT9_HUMAN
U87MG_100ug_NHS_Rep1_5Frac_Frac-4_SII_3577_1_3577_2_1	1.87983	4.41421e-05	2.43996e-08	R.[UNIMOD:28][UNIMOD:56]QAGEVTYADAHK[UNIMOD:56]ER.T	sp|Q13247|SRSF6_HUMAN
U87MG_100ug_NHS_Rep1_5Frac_Frac-1_SII_8709_1_8709_2_1	1.87758	4.41421e-05	2.48727e-08	R.SHK[UNIMOD:56]DEVVK[UNIMOD:56]IQSLAR.M	sp|P46940|IQGA1_HUMAN
U87MG_100ug_NHS_Rep1_5Frac_Frac-4_SII_21699_1_21699_3_1	1.87727	4.41421e-05	2.49388e-08	R.[UNIMOD:56]SGVSLAALK[UNIMOD:56]K[UNIMOD:56]ALAAAGYDVEK[UNIMOD:56]NNSR.I	sp|P16403|H12_HUMAN
U87MG_100ug_NHS_Rep1_5Frac_Frac-1_SII_10311_1_10311_2_1	1.87614	4.41421e-05	2.51799e-08	R.LGLPGDEVDNK[UNIMOD:56]VK[UNIMOD:56]GAAGR.T	sp|P78527|PRKDC_HUMAN
U87MG_100ug_NHS_Rep1_5Frac_Frac-2_SII_7759_1_7759_2_1	1.87576	4.41421e-05	2.52619e-08	R.NK[UNIMOD:56]SNEDQSMGNWQIK[UNIMOD:56]R.Q	sp|P02545|LMNA_HUMAN
U87MG_100ug_NHS_Rep1_5Frac_Frac-4_SII_22195_1_22195_3_1	1.87501	4.41421e-05	2.54218e-08	A.[UNIMOD:56]GPAVIEC[UNIMOD:4]WFVEDASGK[UNIMOD:56]GLAK[UNIMOD:56]RPGALLLR.Q	sp|O15533|TPSN_HUMAN
U87MG_100ug_NHS_Rep1_5Frac_Frac-3_SII_16258_1_16258_4_1	1.87496	4.41421e-05	2.54341e-08	-.MSK[UNIMOD:56]PHSEAGTAFIQTQQLHAAMADTFLEHMC[UNIMOD:4]R.L	sp|P14618|KPYM_HUMAN
U87MG_100ug_NHS_Rep1_5Frac_Frac-1_SII_19571_1_19571_3_1	1.87489	4.41421e-05	2.54487e-08	R.[UNIMOD:56]K[UNIMOD:56]DGNASGTTLLEALDC[UNIMOD:4]ILPPTRPTDK[UNIMOD:56]PLR.L	sp|P68104|EF1A1_HUMAN
U87MG_100ug_NHS_Rep1_5Frac_Frac-5_SII_2550_1_2550_2_1	1.8747	4.41421e-05	2.5489e-08	R.THYSNIEANESEEVR.Q	sp|P04632|CPNS1_HUMAN
U87MG_100ug_NHS_Rep1_5Frac_Frac-1_SII_15348_1_15348_3_1	1.87466	4.41421e-05	2.54997e-08	E.[UNIMOD:27]EK[UNIMOD:56]SK[UNIMOD:56]SLAK[UNIMOD:56]LK[UNIMOD:56]NK[UNIMOD:56]HEAMITDLEER.L	sp|P35579|MYH9_HUMAN
U87MG_100ug_NHS_Rep1_5Frac_Frac-1_SII_19645_1_19645_3_1	1.87377	4.41421e-05	2.56938e-08	N.[UNIMOD:27]EFITWNDIQAC[UNIMOD:4]VDHVNLVVQEEHER.I	sp|P46940|IQGA1_HUMAN
U87MG_100ug_NHS_Rep1_5Frac_Frac-1_SII_13156_1_13156_2_1	1.8732	4.41421e-05	2.58177e-08	R.VC[UNIMOD:4]ENIPIVLC[UNIMOD:4]GNK[UNIMOD:56]VDIK[UNIMOD:56]DR.K	sp|P62826|RAN_HUMAN
U87MG_100ug_NHS_Rep1_5Frac_Frac-2_SII_16267_1_16267_3_1	1.87297	4.41421e-05	2.58684e-08	R.[UNIMOD:56]MAQEVLTHLK[UNIMOD:56]EHPDAWTR.V	sp|O14980|XPO1_HUMAN
U87MG_100ug_NHS_Rep1_5Frac_Frac-1_SII_4351_1_4351_2_1	1.87192	4.41421e-05	2.61014e-08	R.[UNIMOD:56]SMSGHPEAAQMVR.R	sp|Q14008|CKAP5_HUMAN
U87MG_100ug_NHS_Rep1_5Frac_Frac-2_SII_19285_1_19285_2_1	1.87186	4.41421e-05	2.6115e-08	R.[UNIMOD:56]SK[UNIMOD:56]TNK[UNIMOD:56]AK[UNIMOD:56]TLATWATK[UNIMOD:56]ELR.K	sp|Q14974|IMB1_HUMAN
U87MG_100ug_NHS_Rep1_5Frac_Frac-3_SII_19419_1_19419_2_1	1.87149	4.41421e-05	2.61977e-08	R.[UNIMOD:56]IINEPTAAAIAYGLDK[UNIMOD:56]K[UNIMOD:56]VGAER.N	sp|P11142|HSP7C_HUMAN
U87MG_100ug_NHS_Rep1_5Frac_Frac-5_SII_7342_1_7342_2_1	1.87145	4.41421e-05	2.62058e-08	R.SEDFGVNEDLADSDAR.A	sp|P04083|ANXA1_HUMAN
U87MG_100ug_NHS_Rep1_5Frac_Frac-4_SII_22675_1_22675_3_1	1.87083	4.41421e-05	2.63443e-08	R.[UNIMOD:56]GLK[UNIMOD:56]M[UNIMOD:35]AVTFIGNSTAIQELFK[UNIMOD:56]R.I	sp|P07437|TBB5_HUMAN
U87MG_100ug_NHS_Rep1_5Frac_Frac-1_SII_19868_1_19868_3_1	1.87036	4.41421e-05	2.64503e-08	R.[UNIMOD:56]K[UNIMOD:56]K[UNIMOD:56]LEMDLK[UNIMOD:56]DLEAHIDSANK[UNIMOD:56]NRDEAIK[UNIMOD:56]QLR.K	sp|P35579|MYH9_HUMAN
U87MG_100ug_NHS_Rep1_5Frac_Frac-5_SII_16426_1_16426_2_1	1.87027	4.41421e-05	2.64706e-08	-.[UNIMOD:1]ADEIAK[UNIMOD:56]AQVARPGGDTIFGK[UNIMOD:56]IIR.K	sp|P49773|HINT1_HUMAN
U87MG_100ug_NHS_Rep1_5Frac_Frac-3_SII_9568_1_9568_2_1	1.8702	4.41421e-05	2.64856e-08	R.SGK[UNIMOD:56]YDLDFK[UNIMOD:56]SPDDPSR.Y	sp|P06733|ENOA_HUMAN
U87MG_100ug_NHS_Rep1_5Frac_Frac-4_SII_22799_1_22799_3_1	1.87019	4.41421e-05	2.64878e-08	-.[UNIMOD:1]DDDIAALVVDNGSGMC[UNIMOD:4]K[UNIMOD:56]AGFAGDDAPR.A	sp|P60709|ACTB_HUMAN
U87MG_100ug_NHS_Rep1_5Frac_Frac-3_SII_22394_1_22394_3_1	1.86987	4.41421e-05	2.65609e-08	R.[UNIMOD:56]GLK[UNIMOD:56]MSATFIGNSTAIQELFK[UNIMOD:56]R.I	sp|P68371|TBB4B_HUMAN
U87MG_100ug_NHS_Rep1_5Frac_Frac-2_SII_19250_1_19250_3_1	1.86972	4.41421e-05	2.65958e-08	-.[UNIMOD:1]SSSPVNVK[UNIMOD:56]K[UNIMOD:56]LK[UNIMOD:56]VSELK[UNIMOD:56]EELK[UNIMOD:56]K[UNIMOD:56]R.R	sp|Q00839|HNRPU_HUMAN
U87MG_100ug_NHS_Rep1_5Frac_Frac-3_SII_22826_1_22826_2_1	1.86884	4.41421e-05	2.67962e-08	R.DQEGQDVLLFIDNIFR.F	sp|P06576|ATPB_HUMAN
U87MG_100ug_NHS_Rep1_5Frac_Frac-2_SII_18692_1_18692_3_1	1.86816	4.41421e-05	2.69503e-08	Q.[UNIMOD:27]EVNILK[UNIMOD:56]K[UNIMOD:56]TLEEEAK[UNIMOD:56]THEAQIQEMR.Q	sp|P35579|MYH9_HUMAN
U87MG_100ug_NHS_Rep1_5Frac_Frac-1_SII_21398_1_21398_4_1	1.86761	4.41421e-05	2.70788e-08	R.VLMEK[UNIMOD:56]EFPGFLENQK[UNIMOD:56]DPLAVDK[UNIMOD:56]IMK[UNIMOD:56]DLDQC[UNIMOD:4]R.D	sp|P60903|S10AA_HUMAN
U87MG_100ug_NHS_Rep1_5Frac_Frac-1_SII_8172_1_8172_2_1	1.86732	4.41421e-05	2.71445e-08	R.LEGLGSSEADQDGLASTVR.S	sp|Q07065|CKAP4_HUMAN
U87MG_100ug_NHS_Rep1_5Frac_Frac-4_SII_15413_1_15413_2_1	1.86659	4.41421e-05	2.73142e-08	-.[UNIMOD:1]DDDIAALVVDNGSGMC[UNIMOD:4]K[UNIMOD:56]AGFAGDDAPR.A	sp|P60709|ACTB_HUMAN
U87MG_100ug_NHS_Rep1_5Frac_Frac-3_SII_6480_1_6480_2_1	1.86653	4.41421e-05	2.73285e-08	R.LQDEIQNM[UNIMOD:35]K[UNIMOD:56]EEMAR.H	sp|P08670|VIME_HUMAN
U87MG_100ug_NHS_Rep1_5Frac_Frac-5_SII_8419_1_8419_2_1	1.86602	4.41421e-05	2.74464e-08	R.VVSSIEQK[UNIMOD:56]TEGAEK[UNIMOD:56]K[UNIMOD:56]QQMAR.E	sp|P63104|1433Z_HUMAN
U87MG_100ug_NHS_Rep1_5Frac_Frac-5_SII_14897_1_14897_3_1	1.866	4.41421e-05	2.74517e-08	-.[UNIMOD:27]EK[UNIMOD:56]TELIQK[UNIMOD:56]AK[UNIMOD:56]LAEQAER.Y	sp|P27348|1433T_HUMAN
U87MG_100ug_NHS_Rep1_5Frac_Frac-4_SII_9783_1_9783_2_1	1.86584	4.41421e-05	2.74899e-08	R.VAPEEHPVLLTEAPLNPK[UNIMOD:56]ANR.E	sp|P60709|ACTB_HUMAN
U87MG_100ug_NHS_Rep1_5Frac_Frac-5_SII_15034_1_15034_2_1	1.86571	4.41421e-05	2.75195e-08	R.DDGLFSGDPNWFPK[UNIMOD:56]K[UNIMOD:56]SK[UNIMOD:56]ENPR.N	sp|P37802|TAGL2_HUMAN
U87MG_100ug_NHS_Rep1_5Frac_Frac-4_SII_15325_1_15325_2_1	1.86551	4.41421e-05	2.75661e-08	R.[UNIMOD:28][UNIMOD:56]QVQSLTC[UNIMOD:4]EVDALK[UNIMOD:56]GTNESLER.Q	sp|P08670|VIME_HUMAN
U87MG_100ug_NHS_Rep1_5Frac_Frac-3_SII_12960_1_12960_3_1	1.86483	4.41421e-05	2.77263e-08	R.[UNIMOD:56]TYEEGLK[UNIMOD:56]HEANNPQLK[UNIMOD:56]EGLQNMEAR.L	sp|P31948|STIP1_HUMAN
U87MG_100ug_NHS_Rep1_5Frac_Frac-3_SII_21760_1_21760_3_1	1.86429	4.41421e-05	2.78549e-08	R.LK[UNIMOD:56]DLEALLNSK[UNIMOD:56]EAALSTALSEK[UNIMOD:56]R.T	sp|P02545|LMNA_HUMAN
U87MG_100ug_NHS_Rep1_5Frac_Frac-4_SII_18148_1_18148_3_1	1.86421	4.41421e-05	2.78732e-08	R.FHVEEEGK[UNIMOD:56]GK[UNIMOD:56]DASGNK[UNIMOD:56]VK[UNIMOD:56]AEPAK[UNIMOD:56]IEAFR.A	sp|P00558|PGK1_HUMAN
U87MG_100ug_NHS_Rep1_5Frac_Frac-4_SII_16268_1_16268_2_1	1.86378	4.41421e-05	2.79765e-08	-.[UNIMOD:1]DDDIAALVVDNGSGMC[UNIMOD:4]K[UNIMOD:56]AGFAGDDAPR.A	sp|P60709|ACTB_HUMAN
U87MG_100ug_NHS_Rep1_5Frac_Frac-1_SII_9928_1_9928_3_1	1.86348	4.41421e-05	2.8048e-08	R.[UNIMOD:27]ENPVYEK[UNIMOD:56]K[UNIMOD:56]PK[UNIMOD:56]K[UNIMOD:56]EVK[UNIMOD:56]K[UNIMOD:56]K[UNIMOD:56]R.W	sp|P46777|RL5_HUMAN
U87MG_100ug_NHS_Rep1_5Frac_Frac-4_SII_16639_1_16639_3_1	1.8631	4.41421e-05	2.81397e-08	R.FHVEEEGK[UNIMOD:56]GK[UNIMOD:56]DASGNK[UNIMOD:56]VK[UNIMOD:56]AEPAK[UNIMOD:56]IEAFR.A	sp|P00558|PGK1_HUMAN
U87MG_100ug_NHS_Rep1_5Frac_Frac-5_SII_8433_1_8433_3_1	1.86276	4.41421e-05	2.82195e-08	-.[UNIMOD:1]PEPTK[UNIMOD:56]SAPAPK[UNIMOD:56]K[UNIMOD:56]GSK[UNIMOD:56]K[UNIMOD:56]AVTK[UNIMOD:56]AQK[UNIMOD:56]K[UNIMOD:56]DGK[UNIMOD:56]K[UNIMOD:56]R.K	sp|P58876|H2B1D_HUMAN
U87MG_100ug_NHS_Rep1_5Frac_Frac-1_SII_20716_1_20716_3_1	1.86248	4.41421e-05	2.82886e-08	T.[UNIMOD:27]EAK[UNIMOD:56]LK[UNIMOD:56]K[UNIMOD:56]LEEEQIILEDQNC[UNIMOD:4]K[UNIMOD:56]LAK[UNIMOD:56]EK[UNIMOD:56]K[UNIMOD:56]LLEDR.I	sp|P35579|MYH9_HUMAN
U87MG_100ug_NHS_Rep1_5Frac_Frac-5_SII_19684_1_19684_3_1	1.86231	4.41421e-05	2.83301e-08	R.SGVSLAALK[UNIMOD:56]K[UNIMOD:56]ALAAAGYDVEK[UNIMOD:56]NNSR.I	sp|P16403|H12_HUMAN
U87MG_100ug_NHS_Rep1_5Frac_Frac-4_SII_16234_1_16234_2_1	1.86217	4.41421e-05	2.83617e-08	-.[UNIMOD:1]DDDIAALVVDNGSGMC[UNIMOD:4]K[UNIMOD:56]AGFAGDDAPR.A	sp|P60709|ACTB_HUMAN
U87MG_100ug_NHS_Rep1_5Frac_Frac-2_SII_13969_1_13969_2_1	1.86173	4.41421e-05	2.84693e-08	R.ELESQISELQEDLESER.A	sp|P35579|MYH9_HUMAN
U87MG_100ug_NHS_Rep1_5Frac_Frac-2_SII_7874_1_7874_3_1	1.86063	4.41421e-05	2.87366e-08	R.ETVSEESNVLC[UNIMOD:4]LSK[UNIMOD:56]SPNK[UNIMOD:56]HNR.L	sp|P13639|EF2_HUMAN
U87MG_100ug_NHS_Rep1_5Frac_Frac-3_SII_2686_1_2686_2_1	1.86037	4.41421e-05	2.88019e-08	R.SHEVK[UNIMOD:56]AEGYEVAHGGR.C	sp|P53041|PPP5_HUMAN
U87MG_100ug_NHS_Rep1_5Frac_Frac-2_SII_18510_1_18510_3_1	1.86034	4.41421e-05	2.88084e-08	R.[UNIMOD:56]SNTGGQAFPQC[UNIMOD:4]VFDHWQILPGDPFDNSSRPSQVVAETR.K	sp|P13639|EF2_HUMAN
U87MG_100ug_NHS_Rep1_5Frac_Frac-5_SII_16882_1_16882_3_1	1.86002	4.41421e-05	2.88861e-08	-.[UNIMOD:1]SNPFLK[UNIMOD:56]QVFNK[UNIMOD:56]DK[UNIMOD:56]TFRPK[UNIMOD:56]R.K	sp|Q96BX8|MOB3A_HUMAN
U87MG_100ug_NHS_Rep1_5Frac_Frac-1_SII_13586_1_13586_3_1	1.8599	4.41421e-05	2.89164e-08	R.TEMEDLM[UNIMOD:35]SSK[UNIMOD:56]DDVGK[UNIMOD:56]SVHELEK[UNIMOD:56]SK[UNIMOD:56]R.A	sp|P35579|MYH9_HUMAN
U87MG_100ug_NHS_Rep1_5Frac_Frac-1_SII_2316_1_2316_2_1	1.85987	4.41421e-05	2.89247e-08	R.ELEDATETADAM[UNIMOD:35]NR.E	sp|P35579|MYH9_HUMAN
U87MG_100ug_NHS_Rep1_5Frac_Frac-5_SII_9753_1_9753_2_1	1.8598	4.41421e-05	2.89423e-08	-.[UNIMOD:56]PEPAK[UNIMOD:56]SAPAPK[UNIMOD:56]K[UNIMOD:56]GSK[UNIMOD:56]K[UNIMOD:56]AVTK[UNIMOD:56]AQK[UNIMOD:56]K[UNIMOD:56]DGK[UNIMOD:56]K[UNIMOD:56]R.K	sp|P62807|H2B1C_HUMAN
U87MG_100ug_NHS_Rep1_5Frac_Frac-4_SII_6877_1_6877_3_1	1.85943	4.41421e-05	2.90334e-08	R.[UNIMOD:56]HQGVMVGM[UNIMOD:35]GQK[UNIMOD:56]DSYVGDEAQSK[UNIMOD:56]R.G	sp|P60709|ACTB_HUMAN
U87MG_100ug_NHS_Rep1_5Frac_Frac-1_SII_17294_1_17294_4_1	1.85933	4.41421e-05	2.90588e-08	R.EQEVNILK[UNIMOD:56]K[UNIMOD:56]TLEEEAK[UNIMOD:56]THEAQIQEMR.Q	sp|P35579|MYH9_HUMAN
U87MG_100ug_NHS_Rep1_5Frac_Frac-1_SII_11290_1_11290_4_1	1.85898	4.41421e-05	2.91455e-08	R.FHVEEEGK[UNIMOD:56]GK[UNIMOD:56]DASGNK[UNIMOD:56]VK[UNIMOD:56]AEPAK[UNIMOD:56]IEAFR.A	sp|P00558|PGK1_HUMAN
U87MG_100ug_NHS_Rep1_5Frac_Frac-5_SII_14044_1_14044_2_1	1.85881	4.41421e-05	2.91877e-08	-.[UNIMOD:1]M[UNIMOD:35]DK[UNIMOD:56]NELVQK[UNIMOD:56]AK[UNIMOD:56]LAEQAER.Y	sp|P63104|1433Z_HUMAN
U87MG_100ug_NHS_Rep1_5Frac_Frac-1_SII_18342_1_18342_4_1	1.85841	4.41421e-05	2.92856e-08	R.AGK[UNIMOD:56]PVIC[UNIMOD:4]ATQMLESMIK[UNIMOD:56]K[UNIMOD:56]PRPTR.A	sp|P14618|KPYM_HUMAN
U87MG_100ug_NHS_Rep1_5Frac_Frac-1_SII_18427_1_18427_3_1	1.85825	4.41421e-05	2.93269e-08	G.[UNIMOD:27]ESSGK[UNIMOD:56]NVTLPAVFK[UNIMOD:56]APIRPDIVNFVHTNLR.K	sp|P36578|RL4_HUMAN
U87MG_100ug_NHS_Rep1_5Frac_Frac-1_SII_9974_1_9974_2_1	1.85779	4.41421e-05	2.94427e-08	R.[UNIMOD:27]ENPVYEK[UNIMOD:56]K[UNIMOD:56]PK[UNIMOD:56]K[UNIMOD:56]EVK[UNIMOD:56]K[UNIMOD:56]K[UNIMOD:56]R.W	sp|P46777|RL5_HUMAN
U87MG_100ug_NHS_Rep1_5Frac_Frac-4_SII_16939_1_16939_3_1	1.85776	4.41421e-05	2.94497e-08	R.ADLK[UNIMOD:56]QLMVHAFIK[UNIMOD:56]R.S	sp|Q02750|MP2K1_HUMAN
U87MG_100ug_NHS_Rep1_5Frac_Frac-5_SII_5740_1_5740_3_1	1.85736	4.41421e-05	2.95484e-08	-.[UNIMOD:1]SESSSK[UNIMOD:56]SSQPLASK[UNIMOD:56]QEK[UNIMOD:56]DGTEK[UNIMOD:56]R.G	sp|P17096|HMGA1_HUMAN
U87MG_100ug_NHS_Rep1_5Frac_Frac-1_SII_18879_1_18879_3_1	1.85686	4.41421e-05	2.96758e-08	-.[UNIMOD:1]ASMGTLAFDEYGRPFLIIK[UNIMOD:56]DQDR.K	sp|P48643|TCPE_HUMAN
U87MG_100ug_NHS_Rep1_5Frac_Frac-4_SII_8155_1_8155_3_1	1.85631	4.41421e-05	2.98163e-08	R.THLTEDTPK[UNIMOD:56]VNADIEK[UNIMOD:56]VNQNQAK[UNIMOD:56]R.C	sp|Q15738|NSDHL_HUMAN
U87MG_100ug_NHS_Rep1_5Frac_Frac-5_SII_6863_1_6863_3_1	1.85578	4.41421e-05	2.99508e-08	-.[UNIMOD:1]SETAPAAPAAPAPAEK[UNIMOD:56]TPVK[UNIMOD:56]K[UNIMOD:56]K[UNIMOD:56]AR.K	sp|P10412|H14_HUMAN
U87MG_100ug_NHS_Rep1_5Frac_Frac-1_SII_9969_1_9969_2_1	1.85544	4.41421e-05	3.00372e-08	R.RDTVEVALEDK[UNIMOD:56]GDSTFR.C	sp|Q14315|FLNC_HUMAN
U87MG_100ug_NHS_Rep1_5Frac_Frac-3_SII_15495_1_15495_3_1	1.855	4.41421e-05	3.01501e-08	R.IGPEPTTDSFIAVMHGPTEGVVPGNALVVDPR.R	sp|Q9H4M9|EHD1_HUMAN
U87MG_100ug_NHS_Rep1_5Frac_Frac-4_SII_12881_1_12881_3_1	1.85497	4.41421e-05	3.01566e-08	R.FHVEEEGK[UNIMOD:56]GK[UNIMOD:56]DASGNK[UNIMOD:56]VK[UNIMOD:56]AEPAK[UNIMOD:56]IEAFR.A	sp|P00558|PGK1_HUMAN
U87MG_100ug_NHS_Rep1_5Frac_Frac-4_SII_24171_1_24171_3_1	1.8546	4.41421e-05	3.02517e-08	-.[UNIMOD:1]EEEIAALVIDNGSGMC[UNIMOD:4]K[UNIMOD:56]AGFAGDDAPR.A	sp|P63261|ACTG_HUMAN
U87MG_100ug_NHS_Rep1_5Frac_Frac-4_SII_22851_1_22851_3_1	1.85456	4.41421e-05	3.02625e-08	R.[UNIMOD:56]GMGTALK[UNIMOD:56]LLLGAGAVAYGVR.E	sp|Q99623|PHB2_HUMAN
U87MG_100ug_NHS_Rep1_5Frac_Frac-5_SII_16273_1_16273_3_1	1.85434	4.41421e-05	3.03194e-08	-.[UNIMOD:1]AEEQPQVELFVK[UNIMOD:56]AGSDGAK[UNIMOD:56]IGNC[UNIMOD:4]PFSQR.L	sp|O00299|CLIC1_HUMAN
U87MG_100ug_NHS_Rep1_5Frac_Frac-1_SII_8704_1_8704_3_1	1.85388	4.41421e-05	3.044e-08	R.NDTK[UNIMOD:56]EDVFVHQTAIK[UNIMOD:56]K[UNIMOD:56]NNPR.K	sp|P67809|YBOX1_HUMAN
U87MG_100ug_NHS_Rep1_5Frac_Frac-2_SII_4414_1_4414_2_1	1.85304	4.41421e-05	3.0657e-08	R.ELEDATETADAMNR.E	sp|P35579|MYH9_HUMAN
U87MG_100ug_NHS_Rep1_5Frac_Frac-4_SII_10105_1_10105_2_1	1.85297	4.41421e-05	3.06758e-08	R.LVLEVAQHLGESTVR.T	sp|P06576|ATPB_HUMAN
U87MG_100ug_NHS_Rep1_5Frac_Frac-4_SII_19689_1_19689_3_1	1.85243	4.41421e-05	3.08178e-08	R.[UNIMOD:56]GFGFVTYATVEEVDAAMNARPHK[UNIMOD:56]VDGR.V	sp|P09651|ROA1_HUMAN
U87MG_100ug_NHS_Rep1_5Frac_Frac-1_SII_17428_1_17428_4_1	1.85231	4.41421e-05	3.08481e-08	-.[UNIMOD:1]SK[UNIMOD:56]PHSEAGTAFIQTQQLHAAMADTFLEHMC[UNIMOD:4]R.L	sp|P14618|KPYM_HUMAN
U87MG_100ug_NHS_Rep1_5Frac_Frac-5_SII_21970_1_21970_2_1	1.85181	4.41421e-05	3.09821e-08	-.[UNIMOD:56]MK[UNIMOD:56]PLVVFVLGGPGAGK[UNIMOD:56]GTQC[UNIMOD:4]AR.I	sp|P30085|KCY_HUMAN
U87MG_100ug_NHS_Rep1_5Frac_Frac-3_SII_21786_1_21786_3_1	1.85168	4.41421e-05	3.10144e-08	R.[UNIMOD:56]GLK[UNIMOD:56]MSATFIGNSTAIQELFK[UNIMOD:56]R.I	sp|P68371|TBB4B_HUMAN
U87MG_100ug_NHS_Rep1_5Frac_Frac-4_SII_11368_1_11368_2_1	1.85153	4.41421e-05	3.10539e-08	R.EMEENFAVEAANYQDTIGR.L	sp|P08670|VIME_HUMAN
U87MG_100ug_NHS_Rep1_5Frac_Frac-2_SII_18016_1_18016_2_1	1.85148	4.41421e-05	3.10687e-08	-.[UNIMOD:56]PAIMTMLADHAAR.Q	sp|O14980|XPO1_HUMAN
U87MG_100ug_NHS_Rep1_5Frac_Frac-3_SII_15810_1_15810_3_1	1.85121	4.41421e-05	3.11399e-08	R.[UNIMOD:28]QVQSLTC[UNIMOD:4]EVDALK[UNIMOD:56]GTNESLER.Q	sp|P08670|VIME_HUMAN
U87MG_100ug_NHS_Rep1_5Frac_Frac-4_SII_9735_1_9735_2_1	1.8512	4.41421e-05	3.1143e-08	R.NIELIC[UNIMOD:4]QENEGENDPVLQR.I	sp|Q15691|MARE1_HUMAN
U87MG_100ug_NHS_Rep1_5Frac_Frac-2_SII_12126_1_12126_2_1	1.85077	4.41421e-05	3.12576e-08	R.PFPDGLAEDIDK[UNIMOD:56]GEVSAR.Q	sp|P13639|EF2_HUMAN
U87MG_100ug_NHS_Rep1_5Frac_Frac-4_SII_13000_1_13000_2_1	1.85062	4.41421e-05	3.12976e-08	M.[UNIMOD:27]ESC[UNIMOD:4]GIHETTFNSIMK[UNIMOD:56]C[UNIMOD:4]DVDIR.K	sp|P60709|ACTB_HUMAN
U87MG_100ug_NHS_Rep1_5Frac_Frac-4_SII_10831_1_10831_4_1	1.85047	4.41421e-05	3.13363e-08	R.FHVEEEGK[UNIMOD:56]GK[UNIMOD:56]DASGNK[UNIMOD:56]VK[UNIMOD:56]AEPAK[UNIMOD:56]IEAFR.A	sp|P00558|PGK1_HUMAN
U87MG_100ug_NHS_Rep1_5Frac_Frac-2_SII_7744_1_7744_2_1	1.85047	4.41421e-05	3.13381e-08	R.NK[UNIMOD:56]SNEDQSMGNWQIK[UNIMOD:56]R.Q	sp|P02545|LMNA_HUMAN
U87MG_100ug_NHS_Rep1_5Frac_Frac-1_SII_19978_1_19978_3_1	1.85027	4.41421e-05	3.13907e-08	-.[UNIMOD:1]ASGVAVSDGVIK[UNIMOD:56]VFNDMK[UNIMOD:56]VR.K	sp|P23528|COF1_HUMAN
U87MG_100ug_NHS_Rep1_5Frac_Frac-4_SII_18082_1_18082_3_1	1.84993	4.41421e-05	3.14814e-08	R.FHVEEEGK[UNIMOD:56]GK[UNIMOD:56]DASGNK[UNIMOD:56]VK[UNIMOD:56]AEPAK[UNIMOD:56]IEAFR.A	sp|P00558|PGK1_HUMAN
U87MG_100ug_NHS_Rep1_5Frac_Frac-1_SII_12504_1_12504_2_1	1.84917	4.41421e-05	3.1686e-08	R.[UNIMOD:56]TNVLGHLQQGGAPTPFDR.N	sp|P17858|PFKAL_HUMAN
U87MG_100ug_NHS_Rep1_5Frac_Frac-2_SII_1894_1_1894_2_1	1.84907	4.41421e-05	3.17117e-08	R.THNDIIHNENMR.Q	sp|P15311|EZRI_HUMAN
U87MG_100ug_NHS_Rep1_5Frac_Frac-5_SII_8722_1_8722_3_1	1.84852	4.41421e-05	3.18612e-08	R.VVSSIEQK[UNIMOD:56]TEGAEK[UNIMOD:56]K[UNIMOD:56]QQMAR.E	sp|P63104|1433Z_HUMAN
U87MG_100ug_NHS_Rep1_5Frac_Frac-3_SII_10076_1_10076_2_1	1.8481	4.41421e-05	3.19754e-08	R.[UNIMOD:27]ETNLDSLPLVDTHSK[UNIMOD:56]R.T	sp|P08670|VIME_HUMAN
U87MG_100ug_NHS_Rep1_5Frac_Frac-5_SII_9191_1_9191_2_1	1.84782	4.41421e-05	3.20525e-08	R.VADGLPLAASMQEDEQSGR.D	sp|O75396|SC22B_HUMAN
U87MG_100ug_NHS_Rep1_5Frac_Frac-4_SII_10850_1_10850_2_1	1.84742	4.41421e-05	3.21625e-08	R.[UNIMOD:27]ETNLDSLPLVDTHSK[UNIMOD:56]R.T	sp|P08670|VIME_HUMAN
U87MG_100ug_NHS_Rep1_5Frac_Frac-5_SII_13952_1_13952_3_1	1.84674	4.41421e-05	3.23499e-08	R.NPPGFAFVEFEDPRDAADAVR.E	sp|P84103|SRSF3_HUMAN
U87MG_100ug_NHS_Rep1_5Frac_Frac-5_SII_21476_1_21476_3_1	1.84663	4.41421e-05	3.23779e-08	R.EGDK[UNIMOD:56]HTLSK[UNIMOD:56]K[UNIMOD:56]ELK[UNIMOD:56]ELIQK[UNIMOD:56]ELTIGSK[UNIMOD:56]LQDAEIAR.L	sp|P06703|S10A6_HUMAN
U87MG_100ug_NHS_Rep1_5Frac_Frac-4_SII_17552_1_17552_3_1	1.84658	4.41421e-05	3.23942e-08	R.FHVEEEGK[UNIMOD:56]GK[UNIMOD:56]DASGNK[UNIMOD:56]VK[UNIMOD:56]AEPAK[UNIMOD:56]IEAFR.A	sp|P00558|PGK1_HUMAN
U87MG_100ug_NHS_Rep1_5Frac_Frac-4_SII_5837_1_5837_3_1	1.84627	4.41421e-05	3.24774e-08	A.[UNIMOD:56]TSLGRPEEEEDELAHR.C	sp|P36551|HEM6_HUMAN
U87MG_100ug_NHS_Rep1_5Frac_Frac-5_SII_14274_1_14274_3_1	1.84608	4.41421e-05	3.25315e-08	E.[UNIMOD:27]EEVAQK[UNIMOD:56]K[UNIMOD:56]K[UNIMOD:56]ISQK[UNIMOD:56]K[UNIMOD:56]LK[UNIMOD:56]K[UNIMOD:56]QK[UNIMOD:56]LMAR.E	sp|P18621|RL17_HUMAN
U87MG_100ug_NHS_Rep1_5Frac_Frac-4_SII_18925_1_18925_3_1	1.84592	4.41421e-05	3.25748e-08	-.[UNIMOD:1]DDDIAALVVDNGSGMC[UNIMOD:4]K[UNIMOD:56]AGFAGDDAPR.A	sp|P60709|ACTB_HUMAN
U87MG_100ug_NHS_Rep1_5Frac_Frac-5_SII_13819_1_13819_3_1	1.84586	4.41421e-05	3.25911e-08	-.[UNIMOD:1]M[UNIMOD:35]DK[UNIMOD:56]NELVQK[UNIMOD:56]AK[UNIMOD:56]LAEQAER.Y	sp|P63104|1433Z_HUMAN
U87MG_100ug_NHS_Rep1_5Frac_Frac-2_SII_16477_1_16477_2_1	1.84552	4.41421e-05	3.26869e-08	R.[UNIMOD:56]GTK[UNIMOD:56]VILHLK[UNIMOD:56]EDQTEYLEER.R	sp|P07900|HS90A_HUMAN
U87MG_100ug_NHS_Rep1_5Frac_Frac-2_SII_11972_1_11972_2_1	1.8455	4.41421e-05	3.26919e-08	R.IAQLEEELEEEQGNTELINDR.L	sp|P35579|MYH9_HUMAN
U87MG_100ug_NHS_Rep1_5Frac_Frac-1_SII_13378_1_13378_3_1	1.84513	4.41421e-05	3.27945e-08	R.[UNIMOD:56]HIGISFTPK[UNIMOD:56]EVGEHVVSVR.K	sp|Q14315|FLNC_HUMAN
U87MG_100ug_NHS_Rep1_5Frac_Frac-4_SII_11729_1_11729_2_1	1.84452	4.41421e-05	3.29661e-08	R.DLAK[UNIMOD:56]DITSDTSGDFR.N	sp|P04083|ANXA1_HUMAN
U87MG_100ug_NHS_Rep1_5Frac_Frac-2_SII_19954_1_19954_3_1	1.84395	4.41421e-05	3.31283e-08	R.[UNIMOD:56]K[UNIMOD:56]K[UNIMOD:56]LEMDLK[UNIMOD:56]DLEAHIDSANK[UNIMOD:56]NRDEAIK[UNIMOD:56]QLR.K	sp|P35579|MYH9_HUMAN
U87MG_100ug_NHS_Rep1_5Frac_Frac-4_SII_22742_1_22742_3_1	1.84376	4.41421e-05	3.31823e-08	R.[UNIMOD:27]EVAAFAQFGSDLDAATQQLLSR.G	sp|P25705|ATPA_HUMAN
U87MG_100ug_NHS_Rep1_5Frac_Frac-4_SII_14175_1_14175_3_1	1.84375	4.41421e-05	3.31847e-08	R.YASIC[UNIMOD:4]QQNGIVPIVEPEILPDGDHDLK[UNIMOD:56]R.C	sp|P09972|ALDOC_HUMAN
U87MG_100ug_NHS_Rep1_5Frac_Frac-5_SII_23882_1_23882_2_1	1.84361	4.41421e-05	3.3223e-08	-.[UNIMOD:1]ASGVAVSDGVIK[UNIMOD:56]VFNDMK[UNIMOD:56]VR.K	sp|P23528|COF1_HUMAN
U87MG_100ug_NHS_Rep1_5Frac_Frac-1_SII_12526_1_12526_2_1	1.84332	4.41421e-05	3.33062e-08	R.SAC[UNIMOD:4]DTVDTWLDDTAK[UNIMOD:56]GR.Q	sp|Q14204|DYHC1_HUMAN
U87MG_100ug_NHS_Rep1_5Frac_Frac-5_SII_15185_1_15185_3_1	1.84324	4.41421e-05	3.33298e-08	R.VK[UNIMOD:56]EDENVPFLLVGNK[UNIMOD:56]SDLEDK[UNIMOD:56]R.Q	sp|P11233|RALA_HUMAN
U87MG_100ug_NHS_Rep1_5Frac_Frac-2_SII_12963_1_12963_3_1	1.84306	4.41421e-05	3.33807e-08	R.VAAGLQIK[UNIMOD:56]NSLTSK[UNIMOD:56]DPDIK[UNIMOD:56]AQYQQR.W	sp|Q14974|IMB1_HUMAN
U87MG_100ug_NHS_Rep1_5Frac_Frac-4_SII_18938_1_18938_3_1	1.84273	4.41421e-05	3.34744e-08	R.[UNIMOD:56]K[UNIMOD:56]GTDVPK[UNIMOD:56]WISIMTER.S	sp|A6NMY6|AXA2L_HUMAN
U87MG_100ug_NHS_Rep1_5Frac_Frac-1_SII_14908_1_14908_3_1	1.84262	4.41421e-05	3.35043e-08	R.LTAK[UNIMOD:56]K[UNIMOD:56]QELEEIC[UNIMOD:4]HDLEAR.V	sp|P35579|MYH9_HUMAN
U87MG_100ug_NHS_Rep1_5Frac_Frac-5_SII_15425_1_15425_3_1	1.84249	4.41421e-05	3.35429e-08	-.[UNIMOD:1]M[UNIMOD:35]EK[UNIMOD:56]TELIQK[UNIMOD:56]AK[UNIMOD:56]LAEQAER.Y	sp|P27348|1433T_HUMAN
U87MG_100ug_NHS_Rep1_5Frac_Frac-2_SII_18258_1_18258_3_1	1.84209	4.41421e-05	3.36579e-08	R.[UNIMOD:56]SNTGGQAFPQC[UNIMOD:4]VFDHWQILPGDPFDNSSRPSQVVAETR.K	sp|P13639|EF2_HUMAN
U87MG_100ug_NHS_Rep1_5Frac_Frac-5_SII_6951_1_6951_2_1	1.84207	4.41421e-05	3.36628e-08	R.DLEAEHVEVEDTTLNR.C	sp|Q9H3K6|BOLA2_HUMAN
U87MG_100ug_NHS_Rep1_5Frac_Frac-3_SII_9901_1_9901_3_1	1.84193	4.41421e-05	3.37029e-08	-.[UNIMOD:1]PDPSK[UNIMOD:56]SAPAPK[UNIMOD:56]K[UNIMOD:56]GSK[UNIMOD:56]K[UNIMOD:56]AVTK[UNIMOD:56]AQK[UNIMOD:56]K[UNIMOD:56]DGK[UNIMOD:56]K[UNIMOD:56]R.K	sp|Q8N257|H2B3B_HUMAN
U87MG_100ug_NHS_Rep1_5Frac_Frac-5_SII_16514_1_16514_3_1	1.84184	4.41421e-05	3.37282e-08	-.[UNIMOD:1]ASGVAVSDGVIK[UNIMOD:56]VFNDMK[UNIMOD:56]VR.K	sp|P23528|COF1_HUMAN
U87MG_100ug_NHS_Rep1_5Frac_Frac-1_SII_2753_1_2753_2_1	1.84178	4.41421e-05	3.37444e-08	R.[UNIMOD:56]SLTATGGNHVTAR.V	sp|Q14315|FLNC_HUMAN
U87MG_100ug_NHS_Rep1_5Frac_Frac-1_SII_23157_1_23157_3_1	1.84146	4.41421e-05	3.38386e-08	N.[UNIMOD:27]ELLGAAAAIEAAAK[UNIMOD:56]K[UNIMOD:56]LEQLK[UNIMOD:56]PR.A	sp|Q9Y490|TLN1_HUMAN
U87MG_100ug_NHS_Rep1_5Frac_Frac-5_SII_5067_1_5067_2_1	1.84145	4.41421e-05	3.38411e-08	G.SK[UNIMOD:56]K[UNIMOD:56]AVTK[UNIMOD:56]AQK[UNIMOD:56]K[UNIMOD:56]DGK[UNIMOD:56]K[UNIMOD:56]R.K	sp|P62807|H2B1C_HUMAN
U87MG_100ug_NHS_Rep1_5Frac_Frac-2_SII_12037_1_12037_3_1	1.8414	4.41421e-05	3.38544e-08	R.MVNDAEK[UNIMOD:56]FAEEDK[UNIMOD:56]K[UNIMOD:56]LK[UNIMOD:56]ER.I	sp|P11021|BIP_HUMAN
U87MG_100ug_NHS_Rep1_5Frac_Frac-4_SII_7649_1_7649_2_1	1.84068	4.41421e-05	3.40639e-08	R.ESTGAQVQVAGDMLPNSTER.A	sp|Q15365|PCBP1_HUMAN
U87MG_100ug_NHS_Rep1_5Frac_Frac-4_SII_16971_1_16971_2_1	1.84027	4.41421e-05	3.41826e-08	-.[UNIMOD:1]DDDIAALVVDNGSGMC[UNIMOD:4]K[UNIMOD:56]AGFAGDDAPR.A	sp|P60709|ACTB_HUMAN
U87MG_100ug_NHS_Rep1_5Frac_Frac-1_SII_14074_1_14074_2_1	1.84015	4.41421e-05	3.42184e-08	-.[UNIMOD:56]MK[UNIMOD:56]HYEVEILDAK[UNIMOD:56]TR.E	sp|Q9NZ01|TECR_HUMAN
U87MG_100ug_NHS_Rep1_5Frac_Frac-5_SII_23608_1_23608_3_1	1.84014	4.41421e-05	3.422e-08	-.[UNIMOD:1]ASGVAVSDGVIK[UNIMOD:56]VFNDMK[UNIMOD:56]VR.K	sp|P23528|COF1_HUMAN
U87MG_100ug_NHS_Rep1_5Frac_Frac-4_SII_9469_1_9469_3_1	1.84013	4.41421e-05	3.42231e-08	R.[UNIMOD:56]SK[UNIMOD:56]MIDK[UNIMOD:56]NLREDGEK[UNIMOD:56]AAR.E	sp|P04899|GNAI2_HUMAN
U87MG_100ug_NHS_Rep1_5Frac_Frac-5_SII_10343_1_10343_2_1	1.83992	4.41421e-05	3.4284e-08	R.DLAK[UNIMOD:56]DITSDTSGDFR.N	sp|P04083|ANXA1_HUMAN
U87MG_100ug_NHS_Rep1_5Frac_Frac-4_SII_12400_1_12400_3_1	1.83974	4.41421e-05	3.4338e-08	R.FHVEEEGK[UNIMOD:56]GK[UNIMOD:56]DASGNK[UNIMOD:56]VK[UNIMOD:56]AEPAK[UNIMOD:56]IEAFR.A	sp|P00558|PGK1_HUMAN
U87MG_100ug_NHS_Rep1_5Frac_Frac-4_SII_6515_1_6515_1_1	1.83934	4.41421e-05	3.4455e-08	-.[UNIMOD:1]AAAAAAGAGPEMVR.G	sp|P28482|MK01_HUMAN
U87MG_100ug_NHS_Rep1_5Frac_Frac-4_SII_15129_1_15129_3_1	1.8393	4.41421e-05	3.4468e-08	R.GDVVPK[UNIMOD:56]DVNAAIATIK[UNIMOD:56]TK[UNIMOD:56]R.T	sp|P68363|TBA1B_HUMAN
U87MG_100ug_NHS_Rep1_5Frac_Frac-1_SII_12325_1_12325_2_1	1.83872	4.41421e-05	3.46372e-08	R.[UNIMOD:28]QISRPSAAGINLMIGSTR.Y	sp|Q08211|DHX9_HUMAN
U87MG_100ug_NHS_Rep1_5Frac_Frac-2_SII_8446_1_8446_2_1	1.83806	4.41421e-05	3.48333e-08	R.EDEEESLNEVGYDDIGGC[UNIMOD:4]R.K	sp|P55072|TERA_HUMAN
U87MG_100ug_NHS_Rep1_5Frac_Frac-5_SII_24265_1_24265_2_1	1.83787	4.41421e-05	3.48895e-08	-.[UNIMOD:1]ASGVAVSDGVIK[UNIMOD:56]VFNDMK[UNIMOD:56]VR.K	sp|P23528|COF1_HUMAN
U87MG_100ug_NHS_Rep1_5Frac_Frac-3_SII_19525_1_19525_4_1	1.83777	4.41421e-05	3.49194e-08	R.[UNIMOD:56]STGEAFVQFASQEIAEK[UNIMOD:56]ALK[UNIMOD:56]K[UNIMOD:56]HK[UNIMOD:56]ER.I	sp|P55795|HNRH2_HUMAN
U87MG_100ug_NHS_Rep1_5Frac_Frac-5_SII_9303_1_9303_3_1	1.83754	4.41421e-05	3.4988e-08	-.PEPTK[UNIMOD:56]SAPAPK[UNIMOD:56]K[UNIMOD:56]GSK[UNIMOD:56]K[UNIMOD:56]AVTK[UNIMOD:56]AQK[UNIMOD:56]K[UNIMOD:56]DGK[UNIMOD:56]K[UNIMOD:56]R.K	sp|P58876|H2B1D_HUMAN
U87MG_100ug_NHS_Rep1_5Frac_Frac-1_SII_13852_1_13852_2_1	1.83743	4.41421e-05	3.50203e-08	-.[UNIMOD:56]PLAK[UNIMOD:56]DLLHPSPEEEK[UNIMOD:56]R.K	sp|P42677|RS27_HUMAN
U87MG_100ug_NHS_Rep1_5Frac_Frac-5_SII_20122_1_20122_2_1	1.83712	4.41421e-05	3.51122e-08	-.[UNIMOD:1]ASGVAVSDGVIK[UNIMOD:56]VFNDMK[UNIMOD:56]VR.K	sp|P23528|COF1_HUMAN
U87MG_100ug_NHS_Rep1_5Frac_Frac-1_SII_3899_1_3899_4_1	1.8369	4.41421e-05	3.51774e-08	R.QGQQQAGGK[UNIMOD:56]K[UNIMOD:56]K[UNIMOD:56]AEGGGGGGRPGAPAAGDGK[UNIMOD:56]TEQK[UNIMOD:56]GGDK[UNIMOD:56]K[UNIMOD:56]R.G	sp|Q00839|HNRPU_HUMAN
U87MG_100ug_NHS_Rep1_5Frac_Frac-5_SII_22415_1_22415_3_1	1.83651	4.41421e-05	3.52947e-08	R.GALQNIIPASTGAAK[UNIMOD:56]AVGK[UNIMOD:56]VIPELNGK[UNIMOD:56]LTGMAFR.V	sp|P04406|G3P_HUMAN
U87MG_100ug_NHS_Rep1_5Frac_Frac-2_SII_11613_1_11613_2_1	1.83646	4.41421e-05	3.53124e-08	-.[UNIMOD:1]AAAAASHLNLDALR.E	sp|Q13049|TRI32_HUMAN
U87MG_100ug_NHS_Rep1_5Frac_Frac-1_SII_7207_1_7207_2_1	1.83598	4.41421e-05	3.54555e-08	R.TAAANAAAGAAENAFR.A	sp|O14828|SCAM3_HUMAN
U87MG_100ug_NHS_Rep1_5Frac_Frac-5_SII_11850_1_11850_3_1	1.83553	4.41421e-05	3.55922e-08	R.[UNIMOD:56]GTGDVK[UNIMOD:56]LLK[UNIMOD:56]HK[UNIMOD:56]EK[UNIMOD:56]GAIR.L	sp|P43487|RANG_HUMAN
U87MG_100ug_NHS_Rep1_5Frac_Frac-3_SII_13640_1_13640_2_1	1.83503	4.41421e-05	3.57453e-08	R.[UNIMOD:27]EMEENFAVEAANYQDTIGR.L	sp|P08670|VIME_HUMAN
U87MG_100ug_NHS_Rep1_5Frac_Frac-5_SII_14869_1_14869_2_1	1.83433	4.41421e-05	3.59578e-08	-.[UNIMOD:56]MK[UNIMOD:56]FVYK[UNIMOD:56]EEHPFEK[UNIMOD:56]R.R	sp|O95166|GBRAP_HUMAN
U87MG_100ug_NHS_Rep1_5Frac_Frac-3_SII_19280_1_19280_3_1	1.834	4.41421e-05	3.60594e-08	R.K[UNIMOD:56]DGNASGTTLLEALDC[UNIMOD:4]ILPPTRPTDK[UNIMOD:56]PLR.L	sp|P68104|EF1A1_HUMAN
U87MG_100ug_NHS_Rep1_5Frac_Frac-5_SII_10652_1_10652_2_1	1.83361	4.41421e-05	3.61798e-08	R.K[UNIMOD:56]SHEAEVLK[UNIMOD:56]QLAEK[UNIMOD:56]R.E	sp|P16949|STMN1_HUMAN
U87MG_100ug_NHS_Rep1_5Frac_Frac-4_SII_19052_1_19052_2_1	1.83357	4.41421e-05	3.61905e-08	S.[UNIMOD:56]LHTDGDK[UNIMOD:56]AFVDFLSDEIK[UNIMOD:56]EER.K	sp|Q07021|C1QBP_HUMAN
U87MG_100ug_NHS_Rep1_5Frac_Frac-2_SII_8422_1_8422_3_1	1.83338	4.41421e-05	3.62511e-08	R.TESTPITAVK[UNIMOD:56]QPEK[UNIMOD:56]VAATR.Q	sp|Q9Y678|COPG1_HUMAN
U87MG_100ug_NHS_Rep1_5Frac_Frac-2_SII_14915_1_14915_3_1	1.83319	4.41421e-05	3.63092e-08	R.EENAEQQALAAK[UNIMOD:56]REDLEK[UNIMOD:56]K[UNIMOD:56]QQLLR.A	sp|Q9UQE7|SMC3_HUMAN
U87MG_100ug_NHS_Rep1_5Frac_Frac-5_SII_11325_1_11325_2_1	1.83302	4.41421e-05	3.63622e-08	C.[UNIMOD:56]AVPIAQK[UNIMOD:56]SEPHSLSSEALMR.R	sp|Q9NR28|DBLOH_HUMAN
U87MG_100ug_NHS_Rep1_5Frac_Frac-1_SII_22244_1_22244_3_1	1.833	4.41421e-05	3.63677e-08	R.[UNIMOD:56]GFFK[UNIMOD:56]K[UNIMOD:56]GDVVIVLTGWRPGSGFTNTMR.V	sp|P14618|KPYM_HUMAN
U87MG_100ug_NHS_Rep1_5Frac_Frac-4_SII_21546_1_21546_3_1	1.83282	4.41421e-05	3.64243e-08	R.TATQLAVNK[UNIMOD:56]IK[UNIMOD:56]EIAVTVK[UNIMOD:56]K[UNIMOD:56]ADK[UNIMOD:56]VEQR.K	sp|Q99832|TCPH_HUMAN
U87MG_100ug_NHS_Rep1_5Frac_Frac-2_SII_21164_1_21164_3_1	1.83277	4.41421e-05	3.64385e-08	R.[UNIMOD:56]GK[UNIMOD:56]DNK[UNIMOD:56]AIIASNIMYIVGQYPR.F	sp|O14980|XPO1_HUMAN
U87MG_100ug_NHS_Rep1_5Frac_Frac-4_SII_18301_1_18301_3_1	1.83264	4.41421e-05	3.64797e-08	R.FHVEEEGK[UNIMOD:56]GK[UNIMOD:56]DASGNK[UNIMOD:56]VK[UNIMOD:56]AEPAK[UNIMOD:56]IEAFR.A	sp|P00558|PGK1_HUMAN
U87MG_100ug_NHS_Rep1_5Frac_Frac-4_SII_21696_1_21696_3_1	1.83256	4.41421e-05	3.65044e-08	-.[UNIMOD:1]EEEIAALVIDNGSGMC[UNIMOD:4]K[UNIMOD:56]AGFAGDDAPR.A	sp|P63261|ACTG_HUMAN
U87MG_100ug_NHS_Rep1_5Frac_Frac-4_SII_4335_1_4335_2_1	1.83195	4.41421e-05	3.66942e-08	R.[UNIMOD:56]SK[UNIMOD:56]VGSTENIK[UNIMOD:56]HQPGGGR.A	sp|P27816|MAP4_HUMAN
U87MG_100ug_NHS_Rep1_5Frac_Frac-1_SII_14855_1_14855_3_1	1.83189	4.41421e-05	3.67141e-08	-.[UNIMOD:1]AFPHRPDAPELPDFSMLK[UNIMOD:56]R.L	sp|Q9H267|VP33B_HUMAN
U87MG_100ug_NHS_Rep1_5Frac_Frac-5_SII_17838_1_17838_3_1	1.83164	4.41421e-05	3.67932e-08	R.TDITYPAGFMDVISIDK[UNIMOD:56]TGENFR.L	sp|P62701|RS4X_HUMAN
U87MG_100ug_NHS_Rep1_5Frac_Frac-1_SII_15525_1_15525_3_1	1.83127	4.41421e-05	3.69077e-08	E.[UNIMOD:27]EEK[UNIMOD:56]SK[UNIMOD:56]SLAK[UNIMOD:56]LK[UNIMOD:56]NK[UNIMOD:56]HEAMITDLEER.L	sp|P35579|MYH9_HUMAN
U87MG_100ug_NHS_Rep1_5Frac_Frac-1_SII_6004_1_6004_2_1	1.83127	4.41421e-05	3.69082e-08	R.NSNLVGAAHEELQQSR.I	sp|P02545|LMNA_HUMAN
U87MG_100ug_NHS_Rep1_5Frac_Frac-3_SII_22022_1_22022_3_1	1.83123	4.41421e-05	3.69191e-08	Y.[UNIMOD:27]ESVAAK[UNIMOD:56]NLQEAEEWYK[UNIMOD:56]SK[UNIMOD:56]FADLSEAANR.N	sp|P08670|VIME_HUMAN
U87MG_100ug_NHS_Rep1_5Frac_Frac-3_SII_6052_1_6052_2_1	1.83105	4.41421e-05	3.69776e-08	R.AGTGVDNVDLEAATR.K	sp|O43175|SERA_HUMAN
U87MG_100ug_NHS_Rep1_5Frac_Frac-3_SII_10170_1_10170_2_1	1.83043	4.41421e-05	3.71735e-08	R.VAPEEHPVLLTEAPLNPK[UNIMOD:56]ANR.E	sp|P60709|ACTB_HUMAN
U87MG_100ug_NHS_Rep1_5Frac_Frac-1_SII_10407_1_10407_2_1	1.83031	4.41421e-05	3.72105e-08	R.IQGLTVEQAEAVVR.L	sp|Q14204|DYHC1_HUMAN
U87MG_100ug_NHS_Rep1_5Frac_Frac-4_SII_16353_1_16353_3_1	1.83018	4.41421e-05	3.72527e-08	R.FHVEEEGK[UNIMOD:56]GK[UNIMOD:56]DASGNK[UNIMOD:56]VK[UNIMOD:56]AEPAK[UNIMOD:56]IEAFR.A	sp|P00558|PGK1_HUMAN
U87MG_100ug_NHS_Rep1_5Frac_Frac-3_SII_22177_1_22177_3_1	1.82993	4.41421e-05	3.73334e-08	R.[UNIMOD:56]GFFK[UNIMOD:56]K[UNIMOD:56]GDVVIVLTGWRPGSGFTNTMR.V	sp|P14618|KPYM_HUMAN
U87MG_100ug_NHS_Rep1_5Frac_Frac-2_SII_13977_1_13977_3_1	1.82991	4.41421e-05	3.73377e-08	R.EHGAFDAVK[UNIMOD:56]C[UNIMOD:4]THWAEGGK[UNIMOD:56]GALALAQAVQR.A	sp|P11586|C1TC_HUMAN
U87MG_100ug_NHS_Rep1_5Frac_Frac-5_SII_15767_1_15767_3_1	1.82978	4.41421e-05	3.73811e-08	-.[UNIMOD:1]SLSNK[UNIMOD:56]LTLDK[UNIMOD:56]LDVK[UNIMOD:56]GK[UNIMOD:56]R.V	sp|P00558|PGK1_HUMAN
U87MG_100ug_NHS_Rep1_5Frac_Frac-5_SII_7919_1_7919_3_1	1.82955	4.41421e-05	3.74544e-08	-.[UNIMOD:1]PEPAK[UNIMOD:56]SAPAPK[UNIMOD:56]K[UNIMOD:56]GSK[UNIMOD:56]K[UNIMOD:56]AVTK[UNIMOD:56]AQK[UNIMOD:56]K[UNIMOD:56]DGK[UNIMOD:56]K[UNIMOD:56]R.K	sp|P62807|H2B1C_HUMAN
U87MG_100ug_NHS_Rep1_5Frac_Frac-2_SII_16259_1_16259_3_1	1.8289	4.41421e-05	3.76613e-08	R.VEQIAAIAQELNELDYYDSHNVNTR.C	sp|O43707|ACTN4_HUMAN
U87MG_100ug_NHS_Rep1_5Frac_Frac-1_SII_11809_1_11809_2_1	1.82858	4.41421e-05	3.77635e-08	R.LQDEIQNMK[UNIMOD:56]EEMAR.H	sp|P08670|VIME_HUMAN
U87MG_100ug_NHS_Rep1_5Frac_Frac-4_SII_9454_1_9454_3_1	1.82856	4.41421e-05	3.77705e-08	R.[UNIMOD:56]SK[UNIMOD:56]MIDK[UNIMOD:56]NLREDGEK[UNIMOD:56]AAR.E	sp|P04899|GNAI2_HUMAN
U87MG_100ug_NHS_Rep1_5Frac_Frac-1_SII_10394_1_10394_3_1	1.82852	4.41421e-05	3.77842e-08	R.FQNVAK[UNIMOD:56]EGVK[UNIMOD:56]FDESEK[UNIMOD:56]TK[UNIMOD:56]ESR.E	sp|P14625|ENPL_HUMAN
U87MG_100ug_NHS_Rep1_5Frac_Frac-1_SII_20852_1_20852_3_1	1.82838	4.41421e-05	3.78279e-08	R.[UNIMOD:56]SVAGK[UNIMOD:56]IQK[UNIMOD:56]LSK[UNIMOD:56]AVATWHANTER.E	sp|P51531|SMCA2_HUMAN
U87MG_100ug_NHS_Rep1_5Frac_Frac-5_SII_15005_1_15005_3_1	1.82808	4.41421e-05	3.79256e-08	R.AMK[UNIMOD:56]DEEK[UNIMOD:56]MEIQEMQLK[UNIMOD:56]EAK[UNIMOD:56]HIAEEADR.K	sp|P67936|TPM4_HUMAN
U87MG_100ug_NHS_Rep1_5Frac_Frac-3_SII_13739_1_13739_3_1	1.82805	4.41421e-05	3.79356e-08	R.[UNIMOD:56]TADGIVSHLK[UNIMOD:56]K[UNIMOD:56]QAGPASVPLR.T	sp|P30101|PDIA3_HUMAN
U87MG_100ug_NHS_Rep1_5Frac_Frac-4_SII_13591_1_13591_2_1	1.82742	4.41421e-05	3.81381e-08	T.[UNIMOD:27]ESLQAC[UNIMOD:4]K[UNIMOD:56]LAQANGWGVMVSHR.S	sp|P06733|ENOA_HUMAN
U87MG_100ug_NHS_Rep1_5Frac_Frac-4_SII_16379_1_16379_3_1	1.8272	4.41421e-05	3.82092e-08	-.[UNIMOD:1]MDEAVGDLK[UNIMOD:56]QALPC[UNIMOD:4]VAESPTVHVEVHQR.G	sp|Q15645|PCH2_HUMAN
U87MG_100ug_NHS_Rep1_5Frac_Frac-2_SII_7772_1_7772_2_1	1.8265	4.41421e-05	3.84401e-08	R.NK[UNIMOD:56]SNEDQSMGNWQIK[UNIMOD:56]R.Q	sp|P02545|LMNA_HUMAN
U87MG_100ug_NHS_Rep1_5Frac_Frac-4_SII_19308_1_19308_3_1	1.8261	4.41421e-05	3.85706e-08	R.[UNIMOD:28]QTVAVGVIK[UNIMOD:56]AVDK[UNIMOD:56]K[UNIMOD:56]AAGAGK[UNIMOD:56]VTK[UNIMOD:56]SAQK[UNIMOD:56]AQK[UNIMOD:56]AK[UNIMOD:56].-	sp|P68104|EF1A1_HUMAN
U87MG_100ug_NHS_Rep1_5Frac_Frac-4_SII_17642_1_17642_3_1	1.82599	4.41421e-05	3.8608e-08	R.FHVEEEGK[UNIMOD:56]GK[UNIMOD:56]DASGNK[UNIMOD:56]VK[UNIMOD:56]AEPAK[UNIMOD:56]IEAFR.A	sp|P00558|PGK1_HUMAN
U87MG_100ug_NHS_Rep1_5Frac_Frac-4_SII_10969_1_10969_2_1	1.82577	4.41421e-05	3.86802e-08	R.[UNIMOD:56]SGK[UNIMOD:56]YDLDFK[UNIMOD:56]SPDDPSR.Y	sp|P06733|ENOA_HUMAN
U87MG_100ug_NHS_Rep1_5Frac_Frac-3_SII_13990_1_13990_2_1	1.82519	4.41421e-05	3.88714e-08	-.[UNIMOD:56]PYQYPALTPEQK[UNIMOD:56]K[UNIMOD:56]ELSDIAHR.I	sp|P04075|ALDOA_HUMAN
U87MG_100ug_NHS_Rep1_5Frac_Frac-2_SII_6092_1_6092_2_1	1.82506	4.41421e-05	3.89153e-08	R.LGAGPDGVEEIK[UNIMOD:56]R.H	sp|P51812|KS6A3_HUMAN
U87MG_100ug_NHS_Rep1_5Frac_Frac-4_SII_16221_1_16221_2_1	1.82471	4.41421e-05	3.9029e-08	-.[UNIMOD:1]DDDIAALVVDNGSGMC[UNIMOD:4]K[UNIMOD:56]AGFAGDDAPR.A	sp|P60709|ACTB_HUMAN
U87MG_100ug_NHS_Rep1_5Frac_Frac-3_SII_11529_1_11529_2_1	1.8244	4.41421e-05	3.91332e-08	-.[UNIMOD:56]MK[UNIMOD:56]IEEVK[UNIMOD:56]STTK[UNIMOD:56]TQR.I	sp|Q9Y265|RUVB1_HUMAN
U87MG_100ug_NHS_Rep1_5Frac_Frac-1_SII_10779_1_10779_2_1	1.82435	4.41421e-05	3.9149e-08	-.[UNIMOD:1]AK[UNIMOD:56]IAK[UNIMOD:56]THEDIEAQIR.E	sp|O75533|SF3B1_HUMAN
U87MG_100ug_NHS_Rep1_5Frac_Frac-5_SII_4392_1_4392_2_1	1.82427	4.41421e-05	3.91767e-08	R.[UNIMOD:1]K[UNIMOD:56]SAPATGGVK[UNIMOD:56]K[UNIMOD:56]PHR.Y	sp|Q16695|H31T_HUMAN
U87MG_100ug_NHS_Rep1_5Frac_Frac-5_SII_9937_1_9937_3_1	1.82415	4.41421e-05	3.92168e-08	-.[UNIMOD:1]PDPSK[UNIMOD:56]SAPAPK[UNIMOD:56]K[UNIMOD:56]GSK[UNIMOD:56]K[UNIMOD:56]AVTK[UNIMOD:56]AQK[UNIMOD:56]K[UNIMOD:56]DGK[UNIMOD:56]K[UNIMOD:56]R.K	sp|Q8N257|H2B3B_HUMAN
U87MG_100ug_NHS_Rep1_5Frac_Frac-1_SII_8494_1_8494_3_1	1.82388	4.41421e-05	3.9306e-08	D.PAK[UNIMOD:56]SAPAPK[UNIMOD:56]K[UNIMOD:56]GSK[UNIMOD:56]K[UNIMOD:56]AVTK[UNIMOD:56]AQK[UNIMOD:56]K[UNIMOD:56]DGK[UNIMOD:56]K[UNIMOD:56]R.K	sp|P62807|H2B1C_HUMAN
U87MG_100ug_NHS_Rep1_5Frac_Frac-1_SII_19466_1_19466_3_1	1.82344	4.41421e-05	3.94553e-08	N.[UNIMOD:27]EQK[UNIMOD:56]HK[UNIMOD:56]AGFLDLK[UNIMOD:56]DFLPK[UNIMOD:56]EYVK[UNIMOD:56]QK[UNIMOD:56]GER.K	sp|Q9Y490|TLN1_HUMAN
U87MG_100ug_NHS_Rep1_5Frac_Frac-4_SII_13626_1_13626_3_1	1.8232	4.41421e-05	3.95363e-08	-.[UNIMOD:1]M[UNIMOD:35]DK[UNIMOD:56]NELVQK[UNIMOD:56]AK[UNIMOD:56]LAEQAER.Y	sp|P63104|1433Z_HUMAN
U87MG_100ug_NHS_Rep1_5Frac_Frac-5_SII_12255_1_12255_2_1	1.8231	4.41421e-05	3.95677e-08	R.NFSDNQLQEGK[UNIMOD:56]NVIGLQMGTNR.G	sp|P37802|TAGL2_HUMAN
U87MG_100ug_NHS_Rep1_5Frac_Frac-4_SII_8879_1_8879_3_1	1.82304	4.41421e-05	3.9591e-08	R.[UNIMOD:56]HQGVMVGMGQK[UNIMOD:56]DSYVGDEAQSK[UNIMOD:56]R.G	sp|P60709|ACTB_HUMAN
U87MG_100ug_NHS_Rep1_5Frac_Frac-3_SII_14318_1_14318_2_1	1.82286	4.41421e-05	3.96499e-08	R.[UNIMOD:56]EMAAMC[UNIMOD:4]LGLAHSLSR.Y	sp|Q9Y2X3|NOP58_HUMAN
U87MG_100ug_NHS_Rep1_5Frac_Frac-4_SII_23124_1_23124_3_1	1.82265	4.41421e-05	3.972e-08	-.[UNIMOD:1]DDDIAALVVDNGSGM[UNIMOD:35]C[UNIMOD:4]K[UNIMOD:56]AGFAGDDAPR.A	sp|P60709|ACTB_HUMAN
U87MG_100ug_NHS_Rep1_5Frac_Frac-5_SII_17738_1_17738_3_1	1.82234	4.41421e-05	3.98251e-08	F.[UNIMOD:27]EHFLPMLQTVAK[UNIMOD:56]NK[UNIMOD:56]DQGTYEDYVEGLR.V	sp|P60660|MYL6_HUMAN
U87MG_100ug_NHS_Rep1_5Frac_Frac-1_SII_7181_1_7181_3_1	1.82203	4.41421e-05	3.99313e-08	R.MPSGK[UNIMOD:56]TARPNITDNK[UNIMOD:56]DGTITVR.Y	sp|Q14315|FLNC_HUMAN
U87MG_100ug_NHS_Rep1_5Frac_Frac-5_SII_17485_1_17485_2_1	1.822	4.41421e-05	3.99425e-08	R.SGTVDPQELQK[UNIMOD:56]ALTTMGFR.L	sp|P30626|SORCN_HUMAN
U87MG_100ug_NHS_Rep1_5Frac_Frac-5_SII_10110_1_10110_3_1	1.82149	4.41421e-05	4.01167e-08	-.[UNIMOD:56]PEPAK[UNIMOD:56]FAPAPK[UNIMOD:56]K[UNIMOD:56]GSK[UNIMOD:56]K[UNIMOD:56]AVTK[UNIMOD:56]AQK[UNIMOD:56]K[UNIMOD:56]DGK[UNIMOD:56]K[UNIMOD:56]R.K	sp|Q6DN03|H2B2C_HUMAN
U87MG_100ug_NHS_Rep1_5Frac_Frac-1_SII_12602_1_12602_2_1	1.82122	4.41421e-05	4.02074e-08	E.[UNIMOD:27]EHIPDSPFVVPVASPSGDAR.R	sp|P21333|FLNA_HUMAN
U87MG_100ug_NHS_Rep1_5Frac_Frac-5_SII_18756_1_18756_3_1	1.82118	4.41421e-05	4.02226e-08	-.[UNIMOD:1]ASGVAVSDGVIK[UNIMOD:56]VFNDMK[UNIMOD:56]VR.K	sp|P23528|COF1_HUMAN
U87MG_100ug_NHS_Rep1_5Frac_Frac-5_SII_13512_1_13512_3_1	1.82074	4.41421e-05	4.03726e-08	-.[UNIMOD:1]MDIRPNHTIYINNMNDK[UNIMOD:56]IK[UNIMOD:56]K[UNIMOD:56]EELK[UNIMOD:56]R.S	sp|P08579|RU2B_HUMAN
U87MG_100ug_NHS_Rep1_5Frac_Frac-3_SII_22316_1_22316_3_1	1.82029	4.41421e-05	4.05273e-08	R.[UNIMOD:56]GLK[UNIMOD:56]MSATFIGNSTAIQELFK[UNIMOD:56]R.I	sp|P68371|TBB4B_HUMAN
U87MG_100ug_NHS_Rep1_5Frac_Frac-1_SII_4387_1_4387_2_1	1.82003	4.41421e-05	4.06195e-08	R.[UNIMOD:56]SMSGHPEAAQMVR.R	sp|Q14008|CKAP5_HUMAN
U87MG_100ug_NHS_Rep1_5Frac_Frac-3_SII_15882_1_15882_3_1	1.82	4.41421e-05	4.06289e-08	-.[UNIMOD:1]SLSNK[UNIMOD:56]LTLDK[UNIMOD:56]LDVK[UNIMOD:56]GK[UNIMOD:56]R.V	sp|P00558|PGK1_HUMAN
U87MG_100ug_NHS_Rep1_5Frac_Frac-4_SII_6954_1_6954_2_1	1.81994	4.41421e-05	4.06487e-08	R.LQDEIQNMK[UNIMOD:56]EEM[UNIMOD:35]AR.H	sp|P08670|VIME_HUMAN
U87MG_100ug_NHS_Rep1_5Frac_Frac-1_SII_11546_1_11546_3_1	1.81978	4.41421e-05	4.07039e-08	-.[UNIMOD:56]PEPVK[UNIMOD:56]SAPVPK[UNIMOD:56]K[UNIMOD:56]GSK[UNIMOD:56]K[UNIMOD:56]AINK[UNIMOD:56]AQK[UNIMOD:56]K[UNIMOD:56]DGK[UNIMOD:56]K[UNIMOD:56]R.K	sp|Q99879|H2B1M_HUMAN
U87MG_100ug_NHS_Rep1_5Frac_Frac-3_SII_4861_1_4861_2_1	1.81967	4.41421e-05	4.07416e-08	R.NPLTK[UNIMOD:56]EDK[UNIMOD:56]EAETAR.L	sp|Q15813|TBCE_HUMAN
U87MG_100ug_NHS_Rep1_5Frac_Frac-1_SII_12858_1_12858_2_1	1.81957	4.41421e-05	4.07772e-08	R.[UNIMOD:56]VAPEEHPVLLTEAPLNPK[UNIMOD:56]ANR.E	sp|P60709|ACTB_HUMAN
U87MG_100ug_NHS_Rep1_5Frac_Frac-4_SII_15909_1_15909_3_1	1.81946	4.41421e-05	4.08168e-08	-.[UNIMOD:1]SLSNK[UNIMOD:56]LTLDK[UNIMOD:56]LDVK[UNIMOD:56]GK[UNIMOD:56]R.V	sp|P00558|PGK1_HUMAN
U87MG_100ug_NHS_Rep1_5Frac_Frac-3_SII_17365_1_17365_2_1	1.81914	4.41421e-05	4.0928e-08	R.FDGALNVDLTEFQTNLVPYPR.I	sp|P68363|TBA1B_HUMAN
U87MG_100ug_NHS_Rep1_5Frac_Frac-3_SII_7318_1_7318_2_1	1.81864	4.41421e-05	4.11035e-08	R.[UNIMOD:56]NSNLVGAAHEELQQSR.I	sp|P02545|LMNA_HUMAN
U87MG_100ug_NHS_Rep1_5Frac_Frac-5_SII_9890_1_9890_2_1	1.81852	4.41421e-05	4.11429e-08	R.VAEELALEQAK[UNIMOD:56]K[UNIMOD:56]ESEDQK[UNIMOD:56]R.L	sp|Q9NX63|MIC19_HUMAN
U87MG_100ug_NHS_Rep1_5Frac_Frac-4_SII_16078_1_16078_2_1	1.81837	4.41421e-05	4.11975e-08	-.[UNIMOD:1]DDDIAALVVDNGSGMC[UNIMOD:4]K[UNIMOD:56]AGFAGDDAPR.A	sp|P60709|ACTB_HUMAN
U87MG_100ug_NHS_Rep1_5Frac_Frac-4_SII_14615_1_14615_3_1	1.81837	4.41421e-05	4.11978e-08	-.[UNIMOD:1]DDDIAALVVDNGSGM[UNIMOD:35]C[UNIMOD:4]K[UNIMOD:56]AGFAGDDAPR.A	sp|P60709|ACTB_HUMAN
U87MG_100ug_NHS_Rep1_5Frac_Frac-3_SII_11869_1_11869_2_1	1.81814	4.41421e-05	4.12791e-08	R.LQDEIQNMK[UNIMOD:56]EEMAR.H	sp|P08670|VIME_HUMAN
U87MG_100ug_NHS_Rep1_5Frac_Frac-1_SII_15021_1_15021_2_1	1.81777	4.41421e-05	4.14086e-08	R.[UNIMOD:56]QLFHPEQLITGK[UNIMOD:56]EDAANNYAR.G	sp|P68363|TBA1B_HUMAN
U87MG_100ug_NHS_Rep1_5Frac_Frac-3_SII_13734_1_13734_2_1	1.81762	4.41421e-05	4.14605e-08	R.[UNIMOD:56]TADGIVSHLK[UNIMOD:56]K[UNIMOD:56]QAGPASVPLR.T	sp|P30101|PDIA3_HUMAN
U87MG_100ug_NHS_Rep1_5Frac_Frac-5_SII_12019_1_12019_2_1	1.81713	4.41421e-05	4.16354e-08	R.LQQTQNQVDEVVDIMR.V	sp|Q15836|VAMP3_HUMAN
U87MG_100ug_NHS_Rep1_5Frac_Frac-4_SII_8686_1_8686_2_1	1.81712	4.41421e-05	4.16387e-08	R.SGK[UNIMOD:56]YDLDFK[UNIMOD:56]SPDDPSR.Y	sp|P06733|ENOA_HUMAN
U87MG_100ug_NHS_Rep1_5Frac_Frac-5_SII_18819_1_18819_2_1	1.81697	4.41421e-05	4.16913e-08	R.NDFQLIGIQDGYLSLLQDSGEVR.E	sp|P63241|IF5A1_HUMAN
U87MG_100ug_NHS_Rep1_5Frac_Frac-2_SII_15355_1_15355_3_1	1.81621	4.41421e-05	4.19621e-08	R.[UNIMOD:56]GTK[UNIMOD:56]VILHLK[UNIMOD:56]EDQTEYLEERR.V	sp|P07900|HS90A_HUMAN
U87MG_100ug_NHS_Rep1_5Frac_Frac-2_SII_8940_1_8940_2_1	1.81601	4.41421e-05	4.20323e-08	R.K[UNIMOD:56]DEPDAFK[UNIMOD:56]ELGTGNR.I	sp|P13674|P4HA1_HUMAN
U87MG_100ug_NHS_Rep1_5Frac_Frac-1_SII_18604_1_18604_2_1	1.81597	4.41421e-05	4.20487e-08	R.GIFPVLC[UNIMOD:4]K[UNIMOD:56]DPVQEAWAEDVDLR.V	sp|P14618|KPYM_HUMAN
U87MG_100ug_NHS_Rep1_5Frac_Frac-2_SII_15807_1_15807_3_1	1.81575	4.41421e-05	4.21267e-08	-.[UNIMOD:1]SLSNK[UNIMOD:56]LTLDK[UNIMOD:56]LDVK[UNIMOD:56]GK[UNIMOD:56]R.V	sp|P00558|PGK1_HUMAN
U87MG_100ug_NHS_Rep1_5Frac_Frac-1_SII_14832_1_14832_2_1	1.8155	4.41421e-05	4.22171e-08	R.DQK[UNIMOD:56]K[UNIMOD:56]TQEQLALEMAELTAR.I	sp|P26038|MOES_HUMAN
U87MG_100ug_NHS_Rep1_5Frac_Frac-1_SII_4410_1_4410_2_1	1.81537	4.41421e-05	4.22645e-08	R.[UNIMOD:56]ALTQTGGPHVK[UNIMOD:56]AR.V	sp|P21333|FLNA_HUMAN
U87MG_100ug_NHS_Rep1_5Frac_Frac-3_SII_12172_1_12172_3_1	1.81407	4.41421e-05	4.27333e-08	R.EK[UNIMOD:56]LQEEMLQREEAENTLQSFR.Q	sp|P08670|VIME_HUMAN
U87MG_100ug_NHS_Rep1_5Frac_Frac-5_SII_10838_1_10838_3_1	1.81405	4.41421e-05	4.27411e-08	R.VISSIEQK[UNIMOD:56]TSADGNEK[UNIMOD:56]K[UNIMOD:56]IEMVR.A	sp|P61981|1433G_HUMAN
U87MG_100ug_NHS_Rep1_5Frac_Frac-5_SII_20109_1_20109_3_1	1.81391	4.41421e-05	4.27918e-08	R.SK[UNIMOD:56]ESVPEFPLSPPK[UNIMOD:56]K[UNIMOD:56]K[UNIMOD:56]DLSLEEIQK[UNIMOD:56]K[UNIMOD:56]LEAAEER.R	sp|P16949|STMN1_HUMAN
U87MG_100ug_NHS_Rep1_5Frac_Frac-5_SII_14888_1_14888_3_1	1.81375	4.41421e-05	4.28504e-08	-.[UNIMOD:1]MEGVEEK[UNIMOD:56]K[UNIMOD:56]K[UNIMOD:56]EVPAVPETLK[UNIMOD:56]K[UNIMOD:56]K[UNIMOD:56]R.R	sp|P18124|RL7_HUMAN
U87MG_100ug_NHS_Rep1_5Frac_Frac-1_SII_12142_1_12142_2_1	1.81367	4.41421e-05	4.28802e-08	R.IAQLEEELEEEQGNTELINDR.L	sp|P35579|MYH9_HUMAN
[truncated: 68,401 more rows]
