# Supplementary material for: An SDS-PAGE based proteomic approach for N-terminome profiling
Source: Royal Society of Chemistry journal article supplement (doi:10.1039/c9an01616c), 2019-01-01
Supplement: c9an01616c4.xlsx [file c9an01616c4.xlsx]

## Sheet: Table-S3
Checked	Confidence	Annotated Sequence	Modifications	Modifications in Master Proteins	Contaminant	Marked as	Qvality PEP	Qvality q-value	# Protein Groups	# Proteins	# PSMs	Master Protein Accessions	Positions in Master Proteins	# Missed Cleavages	Theo. MH+ [Da]	# Razor Quan Results	Abundance Ratio: (OE) / (Mock)	Abundance Ratio (log2): (OE) / (Mock)	Abundance Ratio Adj. P-Value: (OE) / (Mock)	Abundance Ratio Variability [%]: (OE) / (Mock)	Abundance Ratios (by Bio. Rep.): (OE,Rep-1) / (Mock,Rep-1)	Abundance Ratios (by Bio. Rep.): (OE,Rep-2) / (Mock,Rep-2)	Abundance Ratios (by Bio. Rep.): (OE,Rep-3) / (Mock,Rep-3)	Abundance Ratios (log2) (by Bio. Rep.): (OE,Rep-1) / (Mock,Rep-1)	Abundance Ratios (log2) (by Bio. Rep.): (OE,Rep-2) / (Mock,Rep-2)	Abundance Ratios (log2) (by Bio. Rep.): (OE,Rep-3) / (Mock,Rep-3)	Abundances (Grouped): Mock	Abundances (Grouped): OE	Abundances (Grouped) CV [%]: Mock	Abundances (Grouped) CV [%]: OE	Abundances (Grouped) Count: Mock	Abundances (Grouped) Count: OE	Abundances (by Bio. Rep.): Mock,Rep-1	Abundances (by Bio. Rep.): Mock,Rep-2	Abundances (by Bio. Rep.): Mock,Rep-3	Abundances (by Bio. Rep.): OE,Rep-1	Abundances (by Bio. Rep.): OE,Rep-2	Abundances (by Bio. Rep.): OE,Rep-3	Abundances (by Bio. Rep.) Count: Mock,Rep-1	Abundances (by Bio. Rep.) Count: Mock,Rep-2	Abundances (by Bio. Rep.) Count: Mock,Rep-3	Abundances (by Bio. Rep.) Count: OE,Rep-1	Abundances (by Bio. Rep.) Count: OE,Rep-2	Abundances (by Bio. Rep.) Count: OE,Rep-3	Abundances (Scaled): F1: Sample, Mock, Rep-1	Abundances (Scaled): F3: Sample, Mock, Rep-2	Abundances (Scaled): F5: Sample, Mock, Rep-3	Abundances (Scaled): F2: Sample, OE, Rep-1	Abundances (Scaled): F4: Sample, OE, Rep-2
FALSE	High	[M].AAAAAAAAAAGAAGGR.[G]	1xAcetyl [N-Term]	Q86U42 1xAcetyl [N-Term]	FALSE		0.000185944	0	1	1	33	Q86U42	Q86U42 [2-17]	0	1240.64	0	2.075	1.05	0.370309	9.68	2.075	4.862	1.939	1.05	2.28	0.96	49.1	150.9	41.25	24.4	3	3	79.5	33.8	53.5	165	164.4	103.7	1	1	1	1	1	1	79.5	33.8	53.5	165	164.4
FALSE	High	[R].KLFIGGLSFETTDESLR.[S]	1xAcetyl [N-Term]; 1xAcetyl:2H(3) [K1]	P09651 1xAcetyl [N-Term]; 1xAcetyl:2H(3) [K15]	FALSE		0.00141892	0	1	2	7	P09651	P09651 [15-31]	0	2000.04	0	1.926	0.95	0.80897	67.06	3.75	1.055	1.926	1.91	0.08	0.95	72.6	127.4	86.67	85.98	3	3	22.3	47.7	135.4	83.6	50.3	260.7	1	1	1	1	1	1	22.3	47.7	135.4	83.6	50.3
FALSE	High	[R].KLFIGGLSFETTDESLR.[S]	1xAcetyl:2H(3) [K1]; 1xAcetyl:2H(3) [N-Term]	P09651 1xAcetyl:2H(3) [K15]; 1xAcetyl:2H(3) [N-Term]	FALSE		4.85699e-05	0	1	2	14	P09651	P09651 [15-31]	0	2003.06	0	2.814	1.49	0.645634	41.16	2.033	2.814	4.854	1.02	1.49	2.28	60.4	139.6	18.29	48.02	3	3	55.5	38.3	48.8	112.8	107.7	237	1	1	1	1	1	1	55.5	38.3	48.8	112.8	107.7
FALSE	High	[R].KLFIGGLSFETTEESLR.[N]	1xAcetyl:2H(3) [K1]	P22626 1xAcetyl:2H(3) [K22]	FALSE		9.77282e-07	0	1	1	3	P22626	P22626 [22-38]	0	1972.05	0	2.449	1.29	0.784018	20.04	1.152	2.78	2.449	0.2	1.47	1.29	64.8	135.2	60.52	28.11	3	3	118.1	32	65.2	136.1	88.9	159.7	1	1	1	1	1	1	118.1	32	65.2	136.1	88.9
FALSE	High	[R].KLFIGGLSFETTEESLR.[N]	1xAcetyl [N-Term]; 1xAcetyl:2H(3) [K1]	P22626 1xAcetyl [N-Term]; 1xAcetyl:2H(3) [K22]	FALSE		0.00116513	0	1	1	2	P22626	P22626 [22-38]	0	2014.06	0	2.272	1.18	0.803978	44.83	100	1.585	2.272	6.64	0.66	1.18	103	97	87.82	104.03	2	3		32.4	138.5	63	51.3	314.7		1	1	1	1	1		32.4	138.5	63	51.3
FALSE	High	[R].KLFIGGLSFETTEESLR.[N]	1xAcetyl:2H(3) [K1]; 1xAcetyl:2H(3) [N-Term]	P22626 1xAcetyl:2H(3) [K22]; 1xAcetyl:2H(3) [N-Term]	FALSE		0.000134198	0	1	1	9	P22626	P22626 [22-38]	0	2017.08	0	3.115	1.64	0.562237	22.65	3.115	2.039	3.59	1.64	1.03	1.84	53.5	146.5	14.96	20.9	3	3	44.7	60.1	50.8	139.2	122.6	182.5	1	1	1	1	1	1	44.7	60.1	50.8	139.2	122.6
FALSE	High	[E].KLGEYGFQNALIVR.[Y]	1xAcetyl:2H(3) [K1]	P02769 1xAcetyl:2H(3) [K420]	TRUE	FBS	0.000267602	0	1	1	1	P02769	P02769 [420-433]	0	1652.92	0	0.073	-3.77	0.000431907	2.84		0.534	0.01		-0.9	-6.64	108.8	91.2	59.78		2	1		309.3	125.5		165.2			1	1		1			309.3	125.5		165.2
FALSE	High	[R].KLKDGKLVVECVMNNVTCTR.[I]	2xCarbamidomethyl [C11; C18]; 3xAcetyl:2H(3) [K1; K3; K6]; 1xAcetyl:2H(3) [N-Term]	Q01469 2xCarbamidomethyl [C120; C127]; 3xAcetyl:2H(3) [K110; K112; K115]; 1xAcetyl:2H(3) [N-Term]	FALSE		0.0016263	0	1	1	5	Q01469	Q01469 [110-129]	0	2544.34	0	100	6.64	1.64805e-16	0	100	5.724	100	6.64	2.52	6.64	45.9	154.1		37.02	1	3		46		154.1	263	136.9		1		1	1	1		46		154.1	263
FALSE	High	[R].KLMNTNDLEESR.[Q]	1xAcetyl:2H(3) [K1]; 1xAcetyl:2H(3) [N-Term]	Q99538 1xAcetyl:2H(3) [K318]; 1xAcetyl:2H(3) [N-Term]	FALSE		0.00316752	0	1	1	6	Q99538	Q99538 [318-329]	0	1539.76	0	0.551	-0.86	0.784205	12.55	1.851	0.551	0.397	0.89	-0.86	-1.33	125.1	74.9	57.97	14.18	3	3	49.1	125.7	189.8	90.8	69.2	75.3	1	1	1	1	1	1	49.1	125.7	189.8	90.8	69.2
FALSE	High	[R].KLNFNGEGEPEELMVDNWRPAQPLKNR.[Q]	2xAcetyl:2H(3) [K1; K25]	P00918 2xAcetyl:2H(3) [K227; K251]	FALSE		3.9277e-05	0	1	1	20	P00918	P00918 [227-253]	0	3271.64	0	0.585	-0.77	0.816172	9.61	1.603	0.474	0.585	0.68	-1.08	-0.77	113.9	86.1	63.44	20.43	3	3	50.8	201.6	107.7	81.4	95.6	63	1	1	1	1	1	1	50.8	201.6	107.7	81.4	95.6
FALSE	High	[R].KLNFNGEGEPEELMVDNWRPAQPLKNR.[Q]	1xOxidation [M14]; 2xAcetyl:2H(3) [K1; K25]	P00918 1xOxidation [M240]; 2xAcetyl:2H(3) [K227; K251]	FALSE		1.60495e-05	0	1	1	19	P00918	P00918 [227-253]	0	3287.64	0	0.313	-1.68	0.325218	2.31	0.628	0.313	0.263	-0.67	-1.68	-1.93	141.1	58.9	44.65	16.54	3	3	89.5	134.7	219.6	56.2	42.2	57.8	1	1	1	1	1	1	89.5	134.7	219.6	56.2	42.2
FALSE	High	[R].KLSSAMSAAKAICDHVR.[D]	1xCarbamidomethyl [C13]; 2xAcetyl:2H(3) [K1; K10]	P40925 1xCarbamidomethyl [C251]; 2xAcetyl:2H(3) [K239; K248]	FALSE		0.00233962	0	1	1	3	P40925	P40925 [239-255]	0	1935.01	0	0.706	-0.5	0.914729	19.07	0.706	0.888	0.46	-0.5	-0.17	-1.12	117.1	82.9	20.79	46.31	3	3	131	130.7	88.8	92.5	116.1	40.8	1	1	1	1	1	1	131	130.7	88.8	92.5	116.1
FALSE	High	[R].KLSSAMSAAKAICDHVR.[D]	1xCarbamidomethyl [C13]; 2xAcetyl:2H(3) [K1; K10]; 1xAcetyl:2H(3) [N-Term]	P40925 1xCarbamidomethyl [C251]; 2xAcetyl:2H(3) [K239; K248]; 1xAcetyl:2H(3) [N-Term]	FALSE		1.20308e-05	0	1	1	14	P40925	P40925 [239-255]	0	1980.04	0	1.487	0.57	0.939152	42.89	1.487	2.11	1.057	0.57	1.08	0.08	78.2	121.8	2.98	32.97	3	3	81.1	76.8	77.5	120.7	162	81.9	1	1	1	1	1	1	81.1	76.8	77.5	120.7	162
FALSE	High	[GA].KLYKELPDPQESIQR.[A]	2xAcetyl:2H(3) [K1; K4]	G3X6N3 2xAcetyl:2H(3) [K152; K155]; Q29443 2xAcetyl:2H(3) [K152; K155]	TRUE	FBS	0.00088685	0	2	2	2	G3X6N3; Q29443	G3X6N3 [152-166]; Q29443 [152-166]	0	1934.05	0	0.073	-3.77	0.000746648	2.88		0.539	0.01		-0.89	-6.64	102.4	97.6	72.84		2	1		322.8	103.3		173.9			1	1		1			322.8	103.3		173.9
FALSE	High	[R].KLFIGGLSFETTDESLR.[S]	1xAcetyl:2H(3) [K1]	P09651 1xAcetyl:2H(3) [K15]	FALSE		1.48314e-06	0	1	2	13	P09651	P09651 [15-31]	0	1958.03	0	2.058	1.04	0.857343	20.4	0.551	2.058	2.342	-0.86	1.04	1.23	67.4	132.6	91.52	26.86	3	3	196.9	36	55.2	108.6	74	129.3	1	1	1	1	1	1	196.9	36	55.2	108.6	74
FALSE	High	[R].KNEALAPPLLDAEPAR.[G]	1xAcetyl:2H(3) [K1]	Q10469 1xAcetyl:2H(3) [K33]	FALSE		0.00228705	0	1	1	3	Q10469	Q10469 [33-48]	0	1749.96	0	1.823	0.87	0.951946	103.5	0.55	1.823	100	-0.86	0.87	6.64	91.3	108.7	131.5	87.64	2	3	319.1	11.6		175.6	21.2	72.5	1	1		1	1	1	319.1	11.6		175.6	21.2
FALSE	High	[D].KNELVQKAKLAEQAER.[Y]	3xAcetyl:2H(3) [K1; K7; K9]; 1xAcetyl:2H(3) [N-Term]	P63104 3xAcetyl:2H(3) [K3; K9; K11]; 1xAcetyl:2H(3) [N-Term]	FALSE		6.72982e-05	0	1	1	2	P63104	P63104 [3-18]	0	2035.16	0	1.55	0.63	0.983626	5.06	1.497	2.635	1.55	0.58	1.4	0.63	77.3	122.7	23.88	6.1	3	3	83.8	52.1	79	125.5	137.2	122.4	1	1	1	1	1	1	83.8	52.1	79	125.5	137.2
FALSE	High	[R].KNGFVVLKGR.[P]	2xAcetyl:2H(3) [K1; K8]	P63241 2xAcetyl:2H(3) [K27; K34]	FALSE		0.00388601	0	1	2	22	P63241	P63241 [27-36]	0	1207.74	0	1.338	0.42	0.900599	17.46	1.087	1.338	1.495	0.12	0.42	0.58	80.1	119.9	10.14	21.7	3	3	78.3	95.7	85.3	85.1	128.1	127.5	1	1	1	1	1	1	78.3	95.7	85.3	85.1	128.1
FALSE	High	[R].KNGGLGHMNIALLSDLTKQISR.[D]	2xAcetyl:2H(3) [K1; K18]; 1xAcetyl:2H(3) [N-Term]	P30048 2xAcetyl:2H(3) [K149; K166]; 1xAcetyl:2H(3) [N-Term]	FALSE		0.00438638	0	1	1	7	P30048	P30048 [149-170]	0	2501.39	0	1.567	0.65	0.940817	66.92	100	0.86	1.567	6.64	-0.22	0.65	98.7	101.3	24.84	49.07	2	3		149.4	104.7	53.3	128.4	164.2		1	1	1	1	1		149.4	104.7	53.3	128.4
FALSE	High	[R].KNPAVQAGSIVVLQGGEETQR.[Y]	1xAcetyl:2H(3) [K1]	P12955 1xAcetyl:2H(3) [K36]	FALSE		0.000717219	0	1	1	2	P12955	P12955 [36-56]	0	2226.19	0	1.069	0.1	0.999983	0	1.069			0.1			96.7	103.3			1	1	290			310			1			1			290			310
FALSE	High	[R].KNYELLCGDNTR.[K]	1xCarbamidomethyl [C7]; 1xAcetyl:2H(3) [K1]	G3X6N3 1xCarbamidomethyl [C250]; 1xAcetyl:2H(3) [K244]; Q29443 1xCarbamidomethyl [C250]; 1xAcetyl:2H(3) [K244]	TRUE	FBS	0.00112179	0	2	2	10	G3X6N3; Q29443	G3X6N3 [244-255]; Q29443 [244-255]	0	1527.73	0	2.211	1.14	0.297247	88.62	2.211	0.457	3.532	1.14	-1.13	1.82	71.1	128.9	90.69	20.86	3	3	59.1	187.5	30.3	130.5	85.6	107	1	1	1	1	1	1	59.1	187.5	30.3	130.5	85.6
FALSE	High	[R].KNYELLCGDNTR.[K]	1xAcetyl [N-Term]; 1xCarbamidomethyl [C7]; 1xAcetyl:2H(3) [K1]	G3X6N3 1xAcetyl [N-Term]; 1xCarbamidomethyl [C250]; 1xAcetyl:2H(3) [K244]; Q29443 1xAcetyl [N-Term]; 1xCarbamidomethyl [C250]; 1xAcetyl:2H(3) [K244]	TRUE	FBS	0.00141892	0	2	2	19	G3X6N3; Q29443	G3X6N3 [244-255]; Q29443 [244-255]	0	1569.74	0	1.293	0.37	0.914729	130.21	1.293	0.157	3.939	0.37	-2.67	1.98	120.7	79.3	93.54	113.33	3	3	30.6	200.8	60.2	39.5	31.6	237.2	1	1	1	1	1	1	30.6	200.8	60.2	39.5	31.6
FALSE	High	[R].KNYELLCGDNTR.[K]	1xCarbamidomethyl [C7]; 1xAcetyl:2H(3) [K1]; 1xAcetyl:2H(3) [N-Term]	G3X6N3 1xCarbamidomethyl [C250]; 1xAcetyl:2H(3) [K244]; 1xAcetyl:2H(3) [N-Term]; Q29443 1xCarbamidomethyl [C250]; 1xAcetyl:2H(3) [K244]; 1xAcetyl:2H(3) [N-Term]	TRUE	FBS	0.000690537	0	2	2	21	G3X6N3; Q29443	G3X6N3 [244-255]; Q29443 [244-255]	0	1572.76	0	0.978	-0.03	0.988733	54	3.791	0.978	0.606	1.92	-0.03	-0.72	101.1	98.9	45.43	41.72	3	3	43.1	101.8	119.7	163.4	99.5	72.5	1	1	1	1	1	1	43.1	101.8	119.7	163.4	99.5
FALSE	High	[R].KPDTIEVQQMKAQAR.[E]	2xAcetyl:2H(3) [K1; K11]	P35241 2xAcetyl:2H(3) [K296; K306]; P26038 2xAcetyl:2H(3) [K296; K306]; P15311 2xAcetyl:2H(3) [K296; K306]	FALSE		7.12879e-06	0	3	3	13	P35241; P26038; P15311	P35241 [296-310]; P26038 [296-310]; P15311 [296-310]	0	1832.98	0	1.317	0.4	0.959736	98.52	0.442	1.317	3.827	-1.18	0.4	1.94	83.4	116.6	14.88	96.03	3	3	56.3	75.5	71.2	24.9	99.5	272.5	1	1	1	1	1	1	56.3	75.5	71.2	24.9	99.5
FALSE	High	[R].KPLVLCGDLNVAHEEIDLR.[N]	1xCarbamidomethyl [C6]; 1xAcetyl:2H(3) [K1]	P27695 1xCarbamidomethyl [C208]; 1xAcetyl:2H(3) [K203]	FALSE		0.000244322	0	1	1	9	P27695	P27695 [203-221]	0	2236.18	0	0.286	-1.8	0.172537	5.06	0.167	0.286	1.34	-2.58	-1.8	0.42	155.5	44.5	57.02	48.66	3	3	229.3	142.1	63.9	38.3	40.7	85.7	1	1	1	1	1	1	229.3	142.1	63.9	38.3	40.7
FALSE	High	[R].KPLVLCGDLNVAHEEIDLR.[N]	1xCarbamidomethyl [C6]; 1xAcetyl:2H(3) [K1]; 1xAcetyl:2H(3) [N-Term]	P27695 1xCarbamidomethyl [C208]; 1xAcetyl:2H(3) [K203]; 1xAcetyl:2H(3) [N-Term]	FALSE		0.000566975	0	1	1	3	P27695	P27695 [203-221]	0	2281.21	0	11.624	3.54	0.00165496	629.1		100	1.351		6.64	0.43	90.4	109.6		15.23	1	2			174.4		189.9	235.7			1		1	1			174.4		189.9
FALSE	High	[R].KPVTDAENCHLAR.[G]	1xCarbamidomethyl [C9]; 1xAcetyl:2H(3) [K1]	G3X6N3 1xCarbamidomethyl [C603]; 1xAcetyl:2H(3) [K595]; Q29443 1xCarbamidomethyl [C603]; 1xAcetyl:2H(3) [K595]	TRUE	FBS	0.000455044	0	2	2	37	G3X6N3; Q29443	G3X6N3 [595-607]; Q29443 [595-607]	0	1555.77	0	0.644	-0.63	0.915605	15.1	0.644	0.486	1.366	-0.63	-1.04	0.45	114.5	85.5	29.84	26.96	3	3	143.1	123.4	76.7	92.2	60	104.7	1	1	1	1	1	1	143.1	123.4	76.7	92.2	60
FALSE	High	[R].KPVTDAENCHLAR.[G]	1xCarbamidomethyl [C9]; 1xAcetyl:2H(3) [K1]; 1xAcetyl:2H(3) [N-Term]	G3X6N3 1xCarbamidomethyl [C603]; 1xAcetyl:2H(3) [K595]; 1xAcetyl:2H(3) [N-Term]; Q29443 1xCarbamidomethyl [C603]; 1xAcetyl:2H(3) [K595]; 1xAcetyl:2H(3) [N-Term]	TRUE	FBS	0.00379875	0	2	2	22	G3X6N3; Q29443	G3X6N3 [595-607]; Q29443 [595-607]	0	1600.8	0	0.919	-0.12	0.998323	51.49	1.338	0.542	0.919	0.42	-0.88	-0.12	104.2	95.8	16.77	28.03	3	3	90.1	125.1	102.4	120.5	67.7	94.2	1	1	1	1	1	1	90.1	125.1	102.4	120.5	67.7
FALSE	High	[R].KQHPYTFPGGSGTVFAR.[N]	1xAcetyl:2H(3) [K1]; 1xAcetyl:2H(3) [N-Term]	Q10471 1xAcetyl:2H(3) [K363]; 1xAcetyl:2H(3) [N-Term]	FALSE		0.00379875	0	1	1	2	Q10471	Q10471 [363-379]	0	1939.99	0	0.418	-1.26	0.645176	0	0.418			-1.26			141	59			1	1	423.1			176.9			1			1			423.1			176.9
FALSE	High	[D].KNELVQKAKLAEQAER.[Y]	3xAcetyl:2H(3) [K1; K7; K9]	P63104 3xAcetyl:2H(3) [K3; K9; K11]	FALSE		4.35425e-06	0	1	1	4	P63104	P63104 [3-18]	0	1990.13	0	1.064	0.09	0.986008	69.55	1.064	4.565	0.565	0.09	2.19	-0.82	96.9	103.1	29.48	123.36	3	3	55.9	75.4	41.5	59.5	344.1	23.5	1	1	1	1	1	1	55.9	75.4	41.5	59.5	344.1
FALSE	High	[R].KLEVEANNAFDQYR.[D]	1xAcetyl:2H(3) [K1]; 1xAcetyl:2H(3) [N-Term]	P47756 1xAcetyl:2H(3) [K95]; 1xAcetyl:2H(3) [N-Term]	FALSE		0.000102911	0	1	1	14	P47756	P47756 [95-108]	0	1786.89	0	1.399	0.48	0.947183	38.11	1.04	1.924	1.399	0.06	0.94	0.48	76	124	16.76	24.27	3	3	81.4	69.1	96.7	84.7	132.9	135.2	1	1	1	1	1	1	81.4	69.1	96.7	84.7	132.9
FALSE	High	[R].KLDPGSEETQTLVR.[E]	1xAcetyl:2H(3) [K1]	P26641 1xAcetyl:2H(3) [K401]	FALSE		6.72982e-05	0	1	1	23	P26641	P26641 [401-414]	0	1617.85	0	2.762	1.47	0.151192	43.41	1.954	2.762	6.112	0.97	1.47	2.61	46.8	153.2	62.85	16.7	3	3	88.5	44.7	24	172.8	123.6	146.5	1	1	1	1	1	1	88.5	44.7	24	172.8	123.6
FALSE	High	[R].KICLDQQNPLYKKIIKR.[L]	1xCarbamidomethyl [C3]; 4xAcetyl:2H(3) [K1; K12; K13; K16]; 1xAcetyl:2H(3) [N-Term]	F1MD83 1xCarbamidomethyl [C100]; 4xAcetyl:2H(3) [K98; K109; K110; K113]; 1xAcetyl:2H(3) [N-Term]	TRUE	FBS	0.000333435	0	1	1	9	F1MD83	F1MD83 [98-114]	0	2383.4	0	1.534	0.62	0.984287	49.64	1.02	1.534	4.595	0.03	0.62	2.2	60.8	139.2	65.38	30.65	3	3	127	56.6	35.8	129.6	86.7	164.4	1	1	1	1	1	1	127	56.6	35.8	129.6	86.7
FALSE	High	[R].KHKKDISENKR.[A]	4xAcetyl:2H(3) [K1; K3; K4; K10]	P11142 4xAcetyl:2H(3) [K248; K250; K251; K257]	FALSE		0.00180832	0	1	1	102	P11142	P11142 [248-258]	0	1562.9	0	0.296	-1.76	0.124321	1.22	0.268	1.152	0.296	-1.9	0.2	-1.76	150.7	49.3	30.69	51.84	3	3	151.6	88.6	167.5	40.6	102.1	49.6	1	1	1	1	1	1	151.6	88.6	167.5	40.6	102.1
FALSE	High	[R].KHKKDISENKR.[A]	4xAcetyl:2H(3) [K1; K3; K4; K10]; 1xAcetyl:2H(3) [N-Term]	P11142 4xAcetyl:2H(3) [K248; K250; K251; K257]; 1xAcetyl:2H(3) [N-Term]	FALSE		0.00280605	0	1	1	36	P11142	P11142 [248-258]	0	1607.93	0	1.145	0.2	0.949786	35.83	0.591	1.145	1.422	-0.76	0.2	0.51	114.8	85.2	29.68	41.87	3	3	126.3	67.8	104.7	74.6	77.6	148.9	1	1	1	1	1	1	126.3	67.8	104.7	74.6	77.6
FALSE	High	[R].KHKKDISQNKR.[A]	4xAcetyl:2H(3) [K1; K3; K4; K10]	P0DMV9 4xAcetyl:2H(3) [K248; K250; K251; K257]	FALSE		0.00184989	0	1	2	49	P0DMV9	P0DMV9 [248-258]	0	1561.92	0	2.007	1.01	0.408149	54.51	1.031	2.007	2.746	0.04	1.01	1.46	77.5	122.5	45.8	44.54	3	3	106.8	40.7	69.6	110.1	81.6	191.2	1	1	1	1	1	1	106.8	40.7	69.6	110.1	81.6
FALSE	High	[R].KHKKDISQNKR.[A]	4xAcetyl:2H(3) [K1; K3; K4; K10]; 1xAcetyl:2H(3) [N-Term]	P0DMV9 4xAcetyl:2H(3) [K248; K250; K251; K257]; 1xAcetyl:2H(3) [N-Term]	FALSE		0.00198044	0	1	2	32	P0DMV9	P0DMV9 [248-258]	0	1606.95	0	1.913	0.94	0.47123	52.34	1.237	1.913	2.893	0.31	0.94	1.53	72	128	25.48	30.79	3	3	88.5	55.7	61.6	109.5	106.6	178.1	1	1	1	1	1	1	88.5	55.7	61.6	109.5	106.6
FALSE	High	[R].KHLFVQDPQTCKCSCKNTDSR.[C]	3xCarbamidomethyl [C11; C13; C15]; 3xAcetyl:2H(3) [K1; K12; K16]	P15692 3xCarbamidomethyl [C202; C204; C206]; 3xAcetyl:2H(3) [K192; K203; K207]	FALSE		0.00193593	0	1	1	6	P15692	P15692 [192-212]	0	2744.29	0	0.784	-0.35	0.939152	3.6	0.784	0.815	0.01	-0.35	-0.3	-6.64	110.9	89.1	55.12	3.48	3	2	154.1	155.7	42.7	120.7	126.8		1	1	1	1	1		154.1	155.7	42.7	120.7	126.8
FALSE	High	[R].KHIMGQNVADYMR.[Y]	1xAcetyl:2H(3) [K1]	P46777 1xAcetyl:2H(3) [K197]	FALSE		0.00026558	0	1	1	18	P46777	P46777 [197-209]	0	1607.79	0	1.402	0.49	0.857343	59.69	1.402	4.07	0.838	0.49	2.02	-0.26	86.2	113.8	36.58	76.57	3	3	47.7	60.9	96	66.9	248	80.4	1	1	1	1	1	1	47.7	60.9	96	66.9	248
FALSE	High	[R].KHIMGQNVADYMR.[Y]	1xOxidation [M]; 1xAcetyl:2H(3) [K1]	P46777 1xOxidation [M]; 1xAcetyl:2H(3) [K197]	FALSE		0.000739305	0	1	1	58	P46777	P46777 [197-209]	0	1623.78	0	1.155	0.21	0.956462	122.77	0.198	5.747	1.155	-2.33	2.52	0.21	92.8	107.2	66.48	73.17	3	3	155.7	32.7	89.5	30.9	187.9	103.3	1	1	1	1	1	1	155.7	32.7	89.5	30.9	187.9
FALSE	High	[R].KHIMGQNVADYMR.[Y]	1xAcetyl:2H(3) [K1]; 1xAcetyl:2H(3) [N-Term]	P46777 1xAcetyl:2H(3) [K197]; 1xAcetyl:2H(3) [N-Term]	FALSE		0.000388049	0	1	1	9	P46777	P46777 [197-209]	0	1652.82	0	0.837	-0.26	0.984472	29.24	0.837	1.072	0.581	-0.26	0.1	-0.78	96.5	103.5	29.68	43.96	3	3	141.9	104.1	78.2	118.8	111.6	45.5	1	1	1	1	1	1	141.9	104.1	78.2	118.8	111.6
FALSE	High	[R].KHIMGQNVADYMR.[Y]	1xOxidation [M]; 1xAcetyl:2H(3) [K1]; 1xAcetyl:2H(3) [N-Term]	P46777 1xOxidation [M]; 1xAcetyl:2H(3) [K197]; 1xAcetyl:2H(3) [N-Term]	FALSE		0.000448194	0	1	1	12	P46777	P46777 [197-209]	0	1668.81	0	1.141	0.19	0.99381	99.74	0.374	4.317	1.141	-1.42	2.11	0.19	116.8	83.2	82.3	31.24	3	3	195.6	18.1	109.8	73	78.2	125.3	1	1	1	1	1	1	195.6	18.1	109.8	73	78.2
FALSE	High	[R].KHNLCGESEKEQIR.[E]	1xCarbamidomethyl [C5]; 2xAcetyl:2H(3) [K1; K10]	P28161 1xCarbamidomethyl [C87]; 2xAcetyl:2H(3) [K83; K92]	FALSE		0.0013456	0	1	1	9	P28161	P28161 [83-96]	0	1817.91	0	1.689	0.76	0.991057	33.46	0.92	2.07	1.689	-0.12	1.05	0.76	103.1	96.9	102.89	126.88	3	3	37.2	154.1	20.7	34.2	318.9	35	1	1	1	1	1	1	37.2	154.1	20.7	34.2	318.9
FALSE	High	[R].KHNMCGETEEEKIR.[V]	1xCarbamidomethyl [C5]; 2xAcetyl:2H(3) [K1; K12]	P21266 1xCarbamidomethyl [C91]; 2xAcetyl:2H(3) [K87; K98]	FALSE		3.53203e-05	0	1	1	23	P21266	P21266 [87-100]	0	1850.86	0	0.956	-0.07	0.99284	23.97	0.956	1.428	0.786	-0.07	0.51	-0.35	102.3	97.7	93.96	117.99	3	3	44.6	184.4	36.5	42.6	263.2	28.7	1	1	1	1	1	1	44.6	184.4	36.5	42.6	263.2
FALSE	High	[R].KHNMCGETEEEKIR.[V]	1xCarbamidomethyl [C5]; 1xOxidation [M4]; 2xAcetyl:2H(3) [K1; K12]	P21266 1xCarbamidomethyl [C91]; 1xOxidation [M90]; 2xAcetyl:2H(3) [K87; K98]	FALSE		0.00346882	0	1	1	14	P21266	P21266 [87-100]	0	1866.86	0	1.468	0.55	0.992688	18.75	0.249	1.653	1.468	-2.01	0.73	0.55	119.5	80.5	50.7	102.32	3	3	97	139.1	44.5	24.1	230	65.3	1	1	1	1	1	1	97	139.1	44.5	24.1	230
FALSE	High	[R].KHTQAEGKKLGLVGWVQNTDR.[G]	3xAcetyl:2H(3) [K1; K8; K9]	P07311 3xAcetyl:2H(3) [K25; K32; K33]	FALSE		2.87799e-05	0	1	1	37	P07311	P07311 [25-45]	0	2500.36	0	1.37	0.45	0.879819	32.06	1.666	0.544	1.37	0.74	-0.88	0.45	129.5	70.5	71.83	88.95	3	3	17.3	133.1	147	28.8	72.4	201.4	1	1	1	1	1	1	17.3	133.1	147	28.8	72.4
FALSE	High	[R].KHVVKEVLGEHIVPSDQQQIVR.[V]	2xAcetyl:2H(3) [K1; K5]	Q8N9N8 2xAcetyl:2H(3) [K8; K12]	FALSE		0.000487186	0	1	1	5	Q8N9N8	Q8N9N8 [8-29]	0	2628.47	0	5.25	2.39	0.195081	137.13	5.25	19.763	0.394	2.39	4.3	-1.34	32	168	87.43	92.48	3	3	24	16.3	80.9	125.8	321.3	31.9	1	1	1	1	1	1	24	16.3	80.9	125.8	321.3
FALSE	High	[D].KKAQGPKGGGNAVKVR.[H]	4xAcetyl:2H(3) [K1; K2; K7; K14]; 1xAcetyl:2H(3) [N-Term]	Q9Y237 4xAcetyl:2H(3) [K26; K27; K32; K39]; 1xAcetyl:2H(3) [N-Term]	FALSE		0.000127259	0	1	1	33	Q9Y237	Q9Y237 [26-41]	0	1820.1	0	0.802	-0.32	0.972143	21.38	0.622	2.745	0.802	-0.69	1.46	-0.32	110.6	89.4	29.84	49.08	3	3	108.3	60.8	109.2	67.3	166.9	87.5	1	1	1	1	1	1	108.3	60.8	109.2	67.3	166.9
FALSE	High	[R].KKETILCSSDKTDMNR.[H]	1xCarbamidomethyl [C7]; 3xAcetyl:2H(3) [K1; K2; K11]	O94985 1xCarbamidomethyl [C406]; 3xAcetyl:2H(3) [K400; K401; K410]	FALSE		0.00128578	0	1	1	2	O94985	O94985 [400-415]	0	2061.03	0	0.721	-0.47	0.947183	55.28	0.204	0.721	1.909	-2.3	-0.47	0.93	116.2	83.8	44.15	53.12	3	3	157.5	138.7	59	32.1	100	112.7	1	1	1	1	1	1	157.5	138.7	59	32.1	100
FALSE	High	[R].KKETILCSSDKTDMNR.[H]	1xCarbamidomethyl [C7]; 1xOxidation [M14]; 3xAcetyl:2H(3) [K1; K2; K11]	O94985 1xCarbamidomethyl [C406]; 1xOxidation [M413]; 3xAcetyl:2H(3) [K400; K401; K410]	FALSE		0.00270177	0	1	1	8	O94985	O94985 [400-415]	0	2077.03	0	0.543	-0.88	0.764718	33.03	0.132	0.543	1.623	-2.92	-0.88	0.7	154.3	45.7	35.89	117	3	3	147.3	68.3	125	19.5	37.1	202.8	1	1	1	1	1	1	147.3	68.3	125	19.5	37.1
FALSE	High	[R].KKETILCSSDKTDMNR.[H]	1xCarbamidomethyl [C7]; 3xAcetyl:2H(3) [K1; K2; K11]; 1xAcetyl:2H(3) [N-Term]	O94985 1xCarbamidomethyl [C406]; 3xAcetyl:2H(3) [K400; K401; K410]; 1xAcetyl:2H(3) [N-Term]	FALSE		1.77126e-05	0	1	1	8	O94985	O94985 [400-415]	0	2106.06	0	0.977	-0.03	0.999983	7.61	0.462	0.977	1.029	-1.11	-0.03	0.04	101.2	98.8	54.7	5.59	3	3	190.9	82.8	77.4	88.2	80.9	79.7	1	1	1	1	1	1	190.9	82.8	77.4	88.2	80.9
FALSE	High	[R].KKETILCSSDKTDMNR.[H]	1xCarbamidomethyl [C7]; 1xOxidation [M14]; 3xAcetyl:2H(3) [K1; K2; K11]; 1xAcetyl:2H(3) [N-Term]	O94985 1xCarbamidomethyl [C406]; 1xOxidation [M413]; 3xAcetyl:2H(3) [K400; K401; K410]; 1xAcetyl:2H(3) [N-Term]	FALSE		0.000168486	0	1	1	3	O94985	O94985 [400-415]	0	2122.05	0	0.963	-0.06	0.979216	92.12	0.317	0.963	3.463	-1.66	-0.06	1.79	101.9	98.1	40.11	74.09	3	3	130.5	89.1	56.8	41.4	85.7	196.6	1	1	1	1	1	1	130.5	89.1	56.8	41.4	85.7
FALSE	High	[A].KKKDKVKKGGPGSECAEWAWGPCTPSSKDCGVGFR.[E]	3xCarbamidomethyl [C15; C23; C30]; 7xAcetyl:2H(3) [K1; K2; K3; K5; K7; K8; K28]; 1xAcetyl:2H(3) [N-Term]	P21741 3xCarbamidomethyl [C37; C45; C52]; 7xAcetyl:2H(3) [K23; K24; K25; K27; K29; K30; K50]; 1xAcetyl:2H(3) [N-Term]	FALSE		0.000521598	0	1	1	7	P21741	P21741 [23-57]	0	4255.12	0	47.411	5.57	1.17101e-08	141.2	47.411	2.256	100	5.57	1.17	6.64	20.6	179.4	123.72	82.03	2	3	6	90		284.9	203.1	16.1	1	1		1	1	1	6	90		284.9	203.1
FALSE	High	[RK].KKKNNIKLYVR.[R]	4xAcetyl:2H(3) [K1; K2; K3; K7]; 1xAcetyl:2H(3) [N-Term]	P08238 4xAcetyl:2H(3) [K348; K349; K350; K354]; 1xAcetyl:2H(3) [N-Term]; Q76LV2 4xAcetyl:2H(3) [K357; K358; K359; K363]; 1xAcetyl:2H(3) [N-Term]	TRUE	FBS	0.00341669	0	2	4	5	P08238; Q76LV2	P08238 [348-358]; Q76LV2 [357-367]	0	1629.03	0	2.6	1.38	0.590369	75.07	0.659	3.917	2.6	-0.6	1.97	1.38	63.4	136.6	82.35	17.05	3	3	153.8	30.1	54.7	101.3	117.9	142.2	1	1	1	1	1	1	153.8	30.1	54.7	101.3	117.9
FALSE	High	[R].KKQKNIKHSGNITFDEIVNIAR.[Q]	4xAcetyl:2H(3) [K1; K2; K4; K7]	P30050 4xAcetyl:2H(3) [K93; K94; K96; K99]	FALSE		0.000263573	0	1	1	2	P30050	P30050 [93-114]	0	2733.54	0	27.062	4.76	0.00328985	253.87	7.323		100	2.87		6.64	49	151		98.85	1	2	62.4			456.7		80.9	1			1		1	62.4			456.7
FALSE	High	[A].KKQLLCGAAIGTHEDDKYR.[L]	1xCarbamidomethyl [C6]; 3xAcetyl:2H(3) [K1; K2; K17]; 1xAcetyl:2H(3) [N-Term]	P12268 1xCarbamidomethyl [C246]; 3xAcetyl:2H(3) [K241; K242; K257]; 1xAcetyl:2H(3) [N-Term]	FALSE		0.000133184	0	1	1	5	P12268	P12268 [241-259]	0	2383.25	0	0.307	-1.7	0.359866	1.23	0.712	0.28	0.307	-0.49	-1.84	-1.7	116.8	83.2	94.88	64.56	3	3	68.5	310.3	65.4	48.8	86.9	20.1	1	1	1	1	1	1	68.5	310.3	65.4	48.8	86.9
FALSE	High	[R].KKQVAPEKPVKKQKTGETSR.[A]	6xAcetyl:2H(3) [K1; K2; K8; K11; K12; K14]	P53999 6xAcetyl:2H(3) [K28; K29; K35; K38; K39; K41]	FALSE		0.000434802	0	1	1	6	P53999	P53999 [28-47]	0	2537.5	0	1.741	0.8	0.950014	25.13	4.924	1.741	1.446	2.3	0.8	0.53	62.7	137.3	28.52	42.52	3	3	41.7	75.3	59.9	205.3	131.1	86.6	1	1	1	1	1	1	41.7	75.3	59.9	205.3	131.1
FALSE	High	[K].KKTVPQKVTIAKIPR.[A]	4xAcetyl:2H(3) [K1; K2; K7; K12]; 1xAcetyl:2H(3) [N-Term]	O43583 4xAcetyl:2H(3) [K108; K109; K114; K119]; 1xAcetyl:2H(3) [N-Term]	FALSE		0.00248579	0	1	1	7	O43583	O43583 [108-122]	0	1932.25	0	1.793	0.84	0.947183	54.58	1.133	6.268	1.793	0.18	2.65	0.84	68.5	131.5	104.09	46.6	3	3	167.1	14.9	48.5	189.4	93.2	87	1	1	1	1	1	1	167.1	14.9	48.5	189.4	93.2
FALSE	High	[R].KLAQQYYLVYQEPIPTAQLVQR.[V]	1xAcetyl:2H(3) [K1]	P25787 1xAcetyl:2H(3) [K92]	FALSE		0.00202597	0	1	1	1	P25787	P25787 [92-113]	0	2694.47	0	0.975	-0.04	0.972143	72.09	0.338	1.474	0.975	-1.57	0.56	-0.04	89.8	110.2	32.11	68.5	3	3	66.1	103.2	129.8	22.3	152	126.6	1	1	1	1	1	1	66.1	103.2	129.8	22.3	152
FALSE	High	[R].KLAQQYYLVYQEPIPTAQLVQR.[V]	1xAcetyl:2H(3) [K1]; 1xAcetyl:2H(3) [N-Term]	P25787 1xAcetyl:2H(3) [K92]; 1xAcetyl:2H(3) [N-Term]	FALSE		0.000669907	0	1	1	18	P25787	P25787 [92-113]	0	2739.5	0	1.514	0.6	0.93455	35.94	2.162	1.514	1.147	1.11	0.6	0.2	73.5	126.5	43.42	42.06	3	3	52.3	116.7	65.8	113.1	176.7	75.4	1	1	1	1	1	1	52.3	116.7	65.8	113.1	176.7
FALSE	High	[R].KICALDDNVCMAFAGLTADAR.[I]	2xCarbamidomethyl [C3; C10]; 1xAcetyl:2H(3) [K1]; 1xAcetyl:2H(3) [N-Term]	O14818 2xCarbamidomethyl [C63; C70]; 1xAcetyl:2H(3) [K61]; 1xAcetyl:2H(3) [N-Term]	FALSE		0.00128578	0	1	1	10	O14818	O14818 [61-81]	0	2402.14	0	1.144	0.19	0.998323	48.74	2.406	1.144	0.768	1.27	0.19	-0.38	58.7	141.3	55.12	54.15	3	3	59	139.2	57	141.9	159.2	43.8	1	1	1	1	1	1	59	139.2	57	141.9	159.2
FALSE	High	[R].KICLDQQNPLYKKIIKR.[L]	1xCarbamidomethyl [C3]; 4xAcetyl:2H(3) [K1; K12; K13; K16]	F1MD83 1xCarbamidomethyl [C100]; 4xAcetyl:2H(3) [K98; K109; K110; K113]	TRUE	FBS	0.00124738	0	1	1	3	F1MD83	F1MD83 [98-114]	0	2338.37	0	1.816	0.86	0.96318	49.77	1.816	1.206	3.116	0.86	0.27	1.64	67.8	132.2	6.11	43.3	3	3	70.5	65.6	62.4	127.9	79.1	194.5	1	1	1	1	1	1	70.5	65.6	62.4	127.9	79.1
FALSE	High	[R].KQIVAGVNYFLDVELGR.[T]	1xAcetyl:2H(3) [K1]; 1xAcetyl:2H(3) [N-Term]	P01034 1xAcetyl:2H(3) [K80]; 1xAcetyl:2H(3) [N-Term]	FALSE		0.00119192	0	1	1	1	P01034	P01034 [80-96]	0	2011.11	0
FALSE	High	[R].KQSLGELIGTLNAAKVPADTEVVCAPPTAYIDFAR.[Q]	1xCarbamidomethyl [C24]; 2xAcetyl:2H(3) [K1; K15]	P60174 1xCarbamidomethyl [C79]; 2xAcetyl:2H(3) [K56; K70]	FALSE		5.60984e-05	0	1	1	36	P60174	P60174 [56-90]	0	3806	0	2.288	1.19	0.25468	117.04	6.238	0.482	2.288	2.64	-1.05	1.19	41.1	158.9	144.54	48.51	3	3	13.7	288.7	22.1	85.6	139.1	50.7	1	1	1	1	1	1	13.7	288.7	22.1	85.6	139.1
FALSE	High	[R].KQTIDNSQGAYQEAFDISKKEMQPTHPIR.[L]	3xAcetyl:2H(3) [K1; K19; K20]	P27348 3xAcetyl:2H(3) [K139; K157; K158]	FALSE		0.00042181	0	1	1	5	P27348	P27348 [139-167]	0	3495.75	0	0.773	-0.37	0.954878	28.28	0.527	0.773	2.16	-0.93	-0.37	1.11	63.3	136.7	75.69	62.46	3	3	54.5	187.6	58.3	28.7	145.1	125.9	1	1	1	1	1	1	54.5	187.6	58.3	28.7	145.1
FALSE	High	[R].KQTQKEVTVLLEHQKKVSKTR.[H]	5xAcetyl:2H(3) [K1; K5; K15; K16; K19]	Q14574 5xAcetyl:2H(3) [K103; K107; K117; K118; K121]	FALSE		4.96877e-05	0	1	1	24	Q14574	Q14574 [103-123]	0	2733.61	0	0.352	-1.51	0.535535	1.51	0.381	0.286	0.352	-1.39	-1.81	-1.51	147.9	52.1	25.99	12.76	3	3	111.5	189.6	149.6	42.5	54.1	52.6	1	1	1	1	1	1	111.5	189.6	149.6	42.5	54.1
FALSE	High	[R].LAEEKAQASSIPVGSR.[C]	1xAcetyl:2H(3) [K5]	Q99426 1xAcetyl:2H(3) [K153]	FALSE		0.00130542	0	1	1	14	Q99426	Q99426 [149-164]	0	1687.91	0	1.311	0.39	0.967863	15.27	1.311	1.176	2.127	0.39	0.23	1.09	84.1	115.9	28.21	13.01	3	3	101.4	87	56.4	133	102.3	119.9	1	1	1	1	1	1	101.4	87	56.4	133	102.3
FALSE	High	[R].LAELQAKHGDPGDAAQQEAKHR.[E]	2xAcetyl:2H(3) [K7; K20]	O14737 2xAcetyl:2H(3) [K20; K33]	FALSE		0.000728178	0	1	1	6	O14737	O14737 [14-35]	0	2460.25	0	3.436	1.78	0.784018	5.32	100	3.313	3.436	6.64	1.73	1.78	49.2	150.8	16.15	45.82	2	3		66.5	52.9	78.4	220.4	181.7		1	1	1	1	1		66.5	52.9	78.4	220.4
FALSE	High	[R].IAFSCPQKELPDLEDLMKR.[E]	1xCarbamidomethyl [C5]; 2xAcetyl:2H(3) [K8; K18]	Q9HC38 1xCarbamidomethyl [C221]; 2xAcetyl:2H(3) [K224; K234]	FALSE		5.87102e-05	0	1	1	20	Q9HC38	Q9HC38 [217-235]	0	2380.22	0	2.563	1.36	0.513637	2.75	2.61	0.531	2.563	1.38	-0.91	1.36	58.7	141.3	92.16	6.99	3	3	44.4	190	41.8	115.9	100.9	107	1	1	1	1	1	1	44.4	190	41.8	115.9	100.9
FALSE	High	[R].LAGTQPLEVLEAVQR.[S]			FALSE		0.000120679	0	1	1	17	P22314	P22314 [679-693]	0	1623.91	0	0.919	-0.12	0.999636	94.09	0.228	0.919	2.106	-2.13	-0.12	1.07	123.3	76.7	40.66	92.02	3	3	146.8	64.5	95.3	33.5	59.3	200.7	1	1	1	1	1	1	146.8	64.5	95.3	33.5	59.3
FALSE	High	[R].LAKEAKSETSGPQIKELTDEEAER.[L]	3xAcetyl:2H(3) [K3; K6; K15]	Q9Y266 3xAcetyl:2H(3) [K93; K96; K105]	FALSE		3.53203e-05	0	1	1	14	Q9Y266	Q9Y266 [91-114]	0	2794.43	0	2.295	1.2	0.559778	78.76	0.949	3.514	2.295	-0.08	1.81	1.2	72	128	53.25	20.99	3	3	110.8	34.8	68.9	105.1	122.3	158	1	1	1	1	1	1	110.8	34.8	68.9	105.1	122.3
FALSE	High	[R].LAKEVAKQCTDKR.[I]	1xCarbamidomethyl [C9]; 3xAcetyl:2H(3) [K3; K7; K12]	P18206 1xCarbamidomethyl [C1040]; 3xAcetyl:2H(3) [K1034; K1038; K1043]	FALSE		0.00167635	0	1	1	9	P18206	P18206 [1032-1044]	0	1681.93	0	1.374	0.46	0.939152	79.16	0.281	1.374	2.107	-1.83	0.46	1.08	84.3	115.7	15.62	65.15	3	3	108	90.9	79.2	30.3	124.9	166.8	1	1	1	1	1	1	108	90.9	79.2	30.3	124.9
FALSE	High	[R].LAKVDATEESDLAQQYGVR.[G]	1xAcetyl:2H(3) [K3]	P07237 1xAcetyl:2H(3) [K81]	FALSE		2.13447e-06	0	1	1	15	P07237	P07237 [79-97]	0	2138.08	0	0.704	-0.51	0.93455	11.13	0.597	0.704	1.181	-0.74	-0.51	0.24	105.9	94.1	27.8	22.49	3	3	109.3	144.4	82.3	65.3	101.6	97.1	1	1	1	1	1	1	109.3	144.4	82.3	65.3	101.6
FALSE	High	[R].LALGDDSPALKEKR.[V]	2xAcetyl:2H(3) [K11; K13]	P17174 2xAcetyl:2H(3) [K97; K99]	FALSE		0.000448194	0	1	1	11	P17174	P17174 [87-100]	0	1602.9	0	0.657	-0.61	0.91385	14.82	0.657	0.504	0.882	-0.61	-0.99	-0.18	119.8	80.2	21.22	21.5	3	3	99.8	148.8	112	65.5	75.1	98.8	1	1	1	1	1	1	99.8	148.8	112	65.5	75.1
FALSE	High	[R].IASLEVENQSLR.[G]			FALSE		0.00230444	0	1	1	4	P29692	P29692 [84-95]	0	1358.73	0	3.284	1.72	0.531578	92.81	1.228	3.284	10.89	0.3	1.72	3.44	44.2	155.8	86.85	26	3	3	105.3	36.7	17.5	129.4	120.5	190.6	1	1	1	1	1	1	105.3	36.7	17.5	129.4	120.5
FALSE	High	[R].LATALQKLEEAEKAADESER.[G]	2xAcetyl:2H(3) [K7; K13]	P67936 2xAcetyl:2H(3) [K76; K82]; P07951 2xAcetyl:2H(3) [K112; K118]; P06753 2xAcetyl:2H(3) [K113; K119]	FALSE		0.000978707	0	3	4	20	P67936; P07951; P06753	P67936 [70-89]; P07951 [106-125]; P06753 [107-126]	0	2292.18	0	1.993	1	0.443372	41.3	2.548	0.811	1.993	1.35	-0.3	1	81.4	118.6	30.59	44.21	3	3	73.2	99.5	53.5	186.4	80.7	106.7	1	1	1	1	1	1	73.2	99.5	53.5	186.4	80.7
FALSE	High	[R].IAVIADLDTESR.[A]			FALSE		0.000379319	0	1	1	25	Q8WVQ1	Q8WVQ1 [107-118]	0	1302.69	0	0.643	-0.64	0.914729	25.85	0.236	0.643	0.914	-2.08	-0.64	-0.13	119.9	80.1	66	19.29	3	3	241.5	85.5	84.2	57	54.9	76.9	1	1	1	1	1	1	241.5	85.5	84.2	57	54.9
FALSE	High	[R].LAYAIIQFLHDQLR.[H]			FALSE		0.00357549	0	1	1	2	O43765	O43765 [7-20]	0	1700.95	0	100	6.64	1.64805e-16	0		100	100		6.64	6.64		200		61.39		2					430.2	169.8					1	1					430.2
FALSE	High	[R].LCAAAASILGKPADR.[V]	1xCarbamidomethyl [C2]; 1xAcetyl:2H(3) [K11]	A6NHG4 1xCarbamidomethyl [C24]; 1xAcetyl:2H(3) [K33]	FALSE		0.000153828	0	1	2	24	A6NHG4	A6NHG4 [23-37]	0	1558.84	0	0.981	-0.03	0.999983	12.01	0.981	1.64	0.898	-0.03	0.71	-0.16	105.4	94.6	19.1	49.92	3	3	71.3	104.6	96.2	69.9	171.6	86.4	1	1	1	1	1	1	71.3	104.6	96.2	69.9	171.6
FALSE	High	[R].ICKTIVEAASDEER.[L]	1xCarbamidomethyl [C2]; 1xAcetyl:2H(3) [K3]	Q9NWY4 1xCarbamidomethyl [C252]; 1xAcetyl:2H(3) [K253]	FALSE		0.00151908	0	1	1	3	Q9NWY4	Q9NWY4 [251-264]	0	1665.82	0	0.484	-1.05	0.669196	4.98	3.55	0.414	0.484	1.83	-1.27	-1.05	117.3	82.7	66.76	47.39	3	3	38	186.9	109.8	134.8	77.4	53.1	1	1	1	1	1	1	38	186.9	109.8	134.8	77.4
FALSE	High	[R].ICSQYAAYGKEKSR.[L]	1xCarbamidomethyl [C2]; 2xAcetyl:2H(3) [K10; K12]; 1xAcetyl:2H(3) [N-Term]	F1N5M2 1xCarbamidomethyl [C220]; 2xAcetyl:2H(3) [K228; K230]; 1xAcetyl:2H(3) [N-Term]	TRUE	FBS	0.000773715	0	1	1	4	F1N5M2	F1N5M2 [219-232]	0	1795.9	0
FALSE	High	[G].LCTGQIKTGAPCR.[S]	2xCarbamidomethyl [C2; C12]; 1xAcetyl:2H(3) [K7]	P06733 2xCarbamidomethyl [C389; C399]; 1xAcetyl:2H(3) [K394]	FALSE		0.00175433	0	1	3	10	P06733	P06733 [388-400]	0	1506.76	0	0.274	-1.87	0.337228	10.71	0.01	1.115	0.274	-6.64	0.16	-1.87	94.1	105.9	122.44	125.61	3	2	4.7	245.8	59.3		274.1	16.2	1	1	1		1	1	4.7	245.8	59.3		274.1
FALSE	High	[R].LCVLHEKTPVSEKVTK.[C]	1xCarbamidomethyl [C2]; 3xAcetyl:2H(3) [K7; K13; K16]	P02769 1xCarbamidomethyl [C484]; 3xAcetyl:2H(3) [K489; K495; K498]	TRUE	FBS	0.000963979	0	1	1	5	P02769	P02769 [483-498]	0	2003.12	0	0.23	-2.12	0.138997	7.51	0.01	0.23	0.454	-6.64	-2.12	-1.14	124.7	75.3	117.62	39.3	3	2	4.7	361.5	103.6		83.2	47	1	1	1		1	1	4.7	361.5	103.6		83.2
FALSE	High	[R].LCVLHEKTPVSEKVTKCCT.[E]	3xCarbamidomethyl [C2; C17; C18]; 3xAcetyl:2H(3) [K7; K13; K16]	P02769 3xCarbamidomethyl [C484; C499; C500]; 3xAcetyl:2H(3) [K489; K495; K498]	TRUE	FBS	0.00244841	0	1	1	12	P02769	P02769 [483-501]	0	2424.23	0	0.842	-0.25	0.992688	32.72	1.835	0.58	0.842	0.88	-0.79	-0.25	108.6	91.4	17.11	44.23	3	3	82.5	116.5	98.9	151.4	67.5	83.3	1	1	1	1	1	1	82.5	116.5	98.9	151.4	67.5
FALSE	High	[R].LCVLHEKTPVSEKVTKCCTESLVNR.[R]	3xCarbamidomethyl [C2; C17; C18]; 3xAcetyl:2H(3) [K7; K13; K16]	P02769 3xCarbamidomethyl [C484; C499; C500]; 3xAcetyl:2H(3) [K489; K495; K498]	TRUE	FBS	3.19054e-06	0	1	1	104	P02769	P02769 [483-507]	0	3122.6	0	1.112	0.15	0.961721	44.05	1.442	0.573	1.112	0.53	-0.8	0.15	104.4	95.6	19.53	37.51	3	3	98.4	120	81	141.8	68.7	90.1	1	1	1	1	1	1	98.4	120	81	141.8	68.7
FALSE	High	[R].LCVLHEKTPVSEKVTKCCTESLVNR.[R]	1xAcetyl [N-Term]; 3xCarbamidomethyl [C2; C17; C18]; 3xAcetyl:2H(3) [K7; K13; K16]	P02769 1xAcetyl [N-Term]; 3xCarbamidomethyl [C484; C499; C500]; 3xAcetyl:2H(3) [K489; K495; K498]	TRUE	FBS	0.000156179	0	1	1	21	P02769	P02769 [483-507]	0	3164.61	0	1.354	0.44	0.865747	10.27	1.448	0.237	1.354	0.53	-2.08	0.44	118.4	81.6	36.99	74.75	3	3	59.6	125.1	127.2	86.3	29.6	172.2	1	1	1	1	1	1	59.6	125.1	127.2	86.3	29.6
FALSE	High	[R].LCVLHEKTPVSEKVTKCCTESLVNR.[R]	3xCarbamidomethyl [C2; C17; C18]; 3xAcetyl:2H(3) [K7; K13; K16]; 1xAcetyl:2H(3) [N-Term]	P02769 3xCarbamidomethyl [C484; C499; C500]; 3xAcetyl:2H(3) [K489; K495; K498]; 1xAcetyl:2H(3) [N-Term]	TRUE	FBS	5.78264e-05	0	1	1	58	P02769	P02769 [483-507]	0	3167.63	0	0.649	-0.62	0.919045	23	2.379	0.409	0.649	1.25	-1.29	-0.62	110.2	89.8	17.26	81.06	3	3	83.1	91.7	115.3	197.6	37.5	74.8	1	1	1	1	1	1	83.1	91.7	115.3	197.6	37.5
FALSE	High	[R].IDALEKAGQKLIDVNHYAKDEVAAR.[M]	3xAcetyl:2H(3) [K6; K10; K19]	Q13813 3xAcetyl:2H(3) [K633; K637; K646]	FALSE		0.000733721	0	1	1	6	Q13813	Q13813 [628-652]	0	2902.56	0	2.911	1.54	0.34659	137.59	0.21	2.911	8.672	-2.25	1.54	3.12	51.1	148.9	87.06	72.71	3	3	142.8	47.9	24.8	29.9	139.3	215.3	1	1	1	1	1	1	142.8	47.9	24.8	29.9	139.3
FALSE	High	[R].LDALVAEEHLTVDAR.[V]			FALSE		0.000388049	0	1	1	31	Q9UKK9	Q9UKK9 [182-196]	0	1651.86	0	0.65	-0.62	0.91379	4.22	0.65	1.313	0.606	-0.62	0.39	-0.72	121.2	78.8	41.03	72.14	3	3	128.9	129.3	54.9	83.8	169.7	33.3	1	1	1	1	1	1	128.9	129.3	54.9	83.8	169.7
FALSE	High	[R].LDDLVSTGKLNLSQVR.[F]	1xAcetyl:2H(3) [K9]	Q92499 1xAcetyl:2H(3) [K358]	FALSE		0.00129556	0	1	1	1	Q92499	Q92499 [350-365]	0	1803	0	6.074	2.6	0.270191	1215.97	0.369	100		-1.44	6.64		89.9	110.1		117.89	1	2	110.4			40.7	448.9		1			1	1		110.4			40.7	448.9
FALSE	High	[R].LDGAHAPELTKKVQR.[H]	2xAcetyl:2H(3) [K11; K12]	O76003 2xAcetyl:2H(3) [K110; K111]	FALSE		0.00448712	0	1	1	15	O76003	O76003 [100-114]	0	1752.99	0	1.293	0.37	0.961721	74.72	0.641	1.293	3.749	-0.64	0.37	1.91	96.8	103.2	55.81	37.08	3	3	109.2	119.2	31.1	70	154.1	116.4	1	1	1	1	1	1	109.2	119.2	31.1	70	154.1
FALSE	High	[R].LDGKVIILTAAAQGIGQAAALAFAR.[E]	1xAcetyl:2H(3) [K4]	Q9BUT1 1xAcetyl:2H(3) [K7]	FALSE		0.000130188	0	1	1	4	Q9BUT1	Q9BUT1 [4-28]	0	2484.44	0
FALSE	High	[R].LDGLVETPTGYIESLPR.[V]			FALSE		0.000566975	0	1	1	9	P55209	P55209 [56-72]	0	1859.97	0	1.673	0.74	0.840334	62.2	0.971	2.695	1.673	-0.04	1.43	0.74	79.2	120.8	49.18	6.44	3	3	120.8	42.3	76.9	117.3	114	128.7	1	1	1	1	1	1	120.8	42.3	76.9	117.3	114
FALSE	High	[R].LDGMGCLEFDEER.[A]	1xCarbamidomethyl [C6]	Q13951 1xCarbamidomethyl [C124]	FALSE		0.000393979	0	1	1	7	Q13951	Q13951 [119-131]	0	1570.65	0	1.84	0.88	0.840056	95.62	1.84	3.816	0.653	0.88	1.93	-0.61	43.4	156.6	51.55	70.57	3	3	101.2	51.6	38.8	186.1	196.9	25.4	1	1	1	1	1	1	101.2	51.6	38.8	186.1	196.9
FALSE	High	[R].LDHKFDLMYAKR.[A]	2xAcetyl:2H(3) [K4; K11]; 1xAcetyl:2H(3) [N-Term]	P68363 2xAcetyl:2H(3) [K394; K401]; 1xAcetyl:2H(3) [N-Term]	FALSE		0.00123796	0	1	7	6	P68363	P68363 [391-402]	0	1671.89	0	1.658	0.73	0.93455	28.48	1.156	1.658	1.977	0.21	0.73	0.98	67.2	132.8	82.42	57.27	3	3	160.7	31.4	57	185.9	52.1	112.8	1	1	1	1	1	1	160.7	31.4	57	185.9	52.1
FALSE	High	[R].IADISQVYTQNAEMR.[P]			FALSE		0.000343705	0	1	1	2	P60900	P60900 [118-132]	0	1738.84	0	2.326	1.22	0.939152	16.65	2.587	2.326	1.095	1.37	1.22	0.13	92.2	107.8	39.53	47.53	3	3	37.8	86.9	83.7	97.8	202.1	91.7	1	1	1	1	1	1	37.8	86.9	83.7	97.8	202.1
FALSE	High	[R].KHEAKKAAKQEAR.[S]	4xAcetyl:2H(3) [K1; K5; K6; K9]	Q9BY44 4xAcetyl:2H(3) [K490; K494; K495; K498]	FALSE		4.60585e-05	0	1	1	4	Q9BY44	Q9BY44 [490-502]	0	1674.97	0	7.243	2.86	0.069209	1018.07	0.525		100	-0.93		6.64	118.7	81.3		36.92	1	2	247.9			130.1		222	1			1		1	247.9			130.1
FALSE	High	[R].LAAIAESGVER.[Q]			FALSE		0.00151908	0	1	1	23	P28072	P28072 [210-220]	0	1115.61	0	1.158	0.21	0.955854	56.35	2.281	0.718	1.158	1.19	-0.48	0.21	85.9	114.1	42.96	29.14	3	3	63.6	135.6	73.3	145.2	97.3	84.9	1	1	1	1	1	1	63.6	135.6	73.3	145.2	97.3
FALSE	High	[R].IAAKFITHAPPGEFNEVFNDVR.[L]	1xAcetyl:2H(3) [K4]	P52907 1xAcetyl:2H(3) [K19]	FALSE		0.00052957	0	1	1	1	P52907	P52907 [16-37]	0	2517.3	0	1.47	0.56	0.98859	42.36	0.01	1.47	1.89	-6.64	0.56	0.92	73.8	126.2	42.89	21.2	3	2	42.2	101.2	106.5		148.8	201.3	1	1	1		1	1	42.2	101.2	106.5		148.8
FALSE	High	[R].KSDGIYIINLKR.[T]	2xAcetyl:2H(3) [K1; K11]; 1xAcetyl:2H(3) [N-Term]	P08865 2xAcetyl:2H(3) [K42; K52]; 1xAcetyl:2H(3) [N-Term]	FALSE		0.00228705	0	1	1	1	P08865	P08865 [42-53]	0	1554.92	0	0.766	-0.38	0.914729	25.53	0.542	1.695	0.766	-0.88	0.76	-0.38	101.2	98.8	32.33	66.78	3	3	65.3	100.9	128.7	35.4	171.1	98.6	1	1	1	1	1	1	65.3	100.9	128.7	35.4	171.1
FALSE	High	[R].KSHEAEVLKQLAEKR.[E]	3xAcetyl:2H(3) [K1; K9; K14]	P16949 3xAcetyl:2H(3) [K62; K70; K75]	FALSE		6.86351e-06	0	1	1	37	P16949	P16949 [62-76]	0	1901.08	0	1.547	0.63	0.768903	12.55	1.547	6.223	1.416	0.63	2.64	0.5	74.2	125.8	27.36	60.33	3	3	58.1	39.3	69.5	89.9	244.8	98.4	1	1	1	1	1	1	58.1	39.3	69.5	89.9	244.8
FALSE	High	[R].KSLSDSESDDSKSKKKR.[D]	5xAcetyl:2H(3) [K1; K12; K14; K15; K16]	Q13185 5xAcetyl:2H(3) [K92; K103; K105; K106; K107]	FALSE		3.49455e-06	0	1	1	65	Q13185	Q13185 [92-108]	0	2150.14	0	1.701	0.77	0.699789	14.05	1.862	1.044	1.701	0.9	0.06	0.77	80.3	119.7	35.56	22.75	3	3	78.5	112	54.2	146.1	117	92.3	1	1	1	1	1	1	78.5	112	54.2	146.1	117
FALSE	High	[R].KSSTPEEVKKR.[K]	3xAcetyl:2H(3) [K1; K9; K10]	P23528 3xAcetyl:2H(3) [K22; K30; K31]	FALSE		0.00268139	0	1	1	54	P23528	P23528 [22-32]	0	1423.81	0	1.426	0.51	0.819366	41.88	1.829	0.957	1.426	0.87	-0.06	0.51	96.5	103.5	19.16	33.31	3	3	87.9	97.5	66.1	160.8	93.3	94.3	1	1	1	1	1	1	87.9	97.5	66.1	160.8	93.3
FALSE	High	[R].KSSTPEEVKKR.[K]	3xAcetyl:2H(3) [K1; K9; K10]; 1xAcetyl:2H(3) [N-Term]	P23528 3xAcetyl:2H(3) [K22; K30; K31]; 1xAcetyl:2H(3) [N-Term]	FALSE		0.00235741	0	1	1	85	P23528	P23528 [22-32]	0	1468.84	0	1.364	0.45	0.8929	1.11	1.354	1.364	1.375	0.44	0.45	0.46	84.2	115.8	18.01	17.62	3	3	99.4	69	85.4	134.6	94.1	117.4	1	1	1	1	1	1	99.4	69	85.4	134.6	94.1
FALSE	High	[R].KSVDDYQECYLAMVPSHAVVAR.[T]	1xCarbamidomethyl [C9]; 1xAcetyl:2H(3) [K1]	Q29443 1xCarbamidomethyl [C264]; 1xAcetyl:2H(3) [K256]	TRUE	FBS	2.76237e-06	0	1	1	8	Q29443	Q29443 [256-277]	0	2583.24	0	0.678	-0.56	0.920749	36.39	1.709	0.316	0.678	0.77	-1.66	-0.56	113.9	86.1	62.58	39.52	3	3	68	206.3	86.1	116.1	65.1	58.4	1	1	1	1	1	1	68	206.3	86.1	116.1	65.1
FALSE	High	[R].KSVDDYQECYLAMVPSHAVVAR.[T]	1xCarbamidomethyl [C9]; 1xOxidation [M13]; 1xAcetyl:2H(3) [K1]	Q29443 1xCarbamidomethyl [C264]; 1xOxidation [M268]; 1xAcetyl:2H(3) [K256]	TRUE	FBS	0.000194602	0	1	1	4	Q29443	Q29443 [256-277]	0	2599.24	0	0.491	-1.03	0.822624	15.17	0.491	0.282	1.28	-1.03	-1.83	0.36	138	62	33.07	67.32	3	3	93.6	169.8	106.5	45.9	47.9	136.3	1	1	1	1	1	1	93.6	169.8	106.5	45.9	47.9
FALSE	High	[R].KSVDDYQECYLAMVPSHAVVAR.[T]	1xCarbamidomethyl [C9]; 1xAcetyl:2H(3) [K1]; 1xAcetyl:2H(3) [N-Term]	Q29443 1xCarbamidomethyl [C264]; 1xAcetyl:2H(3) [K256]; 1xAcetyl:2H(3) [N-Term]	TRUE	FBS	0.000136249	0	1	1	10	Q29443	Q29443 [256-277]	0	2628.27	0	0.448	-1.16	0.518639	17.15	1.945	0.448	0.19	0.96	-1.16	-2.39	138.1	61.9	44.41	60.85	3	3	61.8	154.4	163.2	120.2	69.2	31.1	1	1	1	1	1	1	61.8	154.4	163.2	120.2	69.2
FALSE	High	[R].KSVDDYQECYLAMVPSHAVVAR.[T]	1xCarbamidomethyl [C9]; 1xOxidation [M13]; 1xAcetyl:2H(3) [K1]; 1xAcetyl:2H(3) [N-Term]	Q29443 1xCarbamidomethyl [C264]; 1xOxidation [M268]; 1xAcetyl:2H(3) [K256]; 1xAcetyl:2H(3) [N-Term]	TRUE	FBS	0.00428789	0	1	1	2	Q29443	Q29443 [256-277]	0	2644.27	0	2.244	1.17	0.877109	60.06	1.335	7.174	2.244	0.42	2.84	1.17	57.5	142.5	98.73	84.59	3	3	38.6	13.3	123.6	51.5	95.6	277.3	1	1	1	1	1	1	38.6	13.3	123.6	51.5	95.6
FALSE	High	[R].KSVDNYQECYLAMVPSHAVVAR.[T]	1xCarbamidomethyl [C9]; 1xAcetyl:2H(3) [K1]; 1xAcetyl:2H(3) [N-Term]	G3X6N3 1xCarbamidomethyl [C264]; 1xAcetyl:2H(3) [K256]; 1xAcetyl:2H(3) [N-Term]	TRUE	FBS	0.0013456	0	1	1	6	G3X6N3	G3X6N3 [256-277]	0	2627.29	0	0.572	-0.81	0.829452	19.67	1.779	0.572	0.34	0.83	-0.81	-1.56	127.2	72.8	18.75	67.8	3	3	88.6	114.3	129.8	157.7	65.4	44.1	1	1	1	1	1	1	88.6	114.3	129.8	157.7	65.4
FALSE	High	[M].KSVTEQGAELSNEER.[N]	1xAcetyl:2H(3) [K1]	P63104 1xAcetyl:2H(3) [K27]	FALSE		8.13487e-05	0	1	1	10	P63104	P63104 [27-41]	0	1721.84	0	0.632	-0.66	0.86773	5.02	0.01	0.686	0.632	-6.64	-0.54	-0.66	106.7	93.3	78.16	44.39	3	2	26.6	219.7	124.5		150.6	78.7	1	1	1		1	1	26.6	219.7	124.5		150.6
FALSE	High	[G].KTFVNITPAEVGVLVGKDR.[S]	2xAcetyl:2H(3) [K1; K17]	P07737 2xAcetyl:2H(3) [K38; K54]	FALSE		5.91572e-05	0	1	1	9	P07737	P07737 [38-56]	0	2133.22	0	1.4	0.49	0.968478	46		1.901	1.032		0.93	0.04	83.3	116.7	62.16	92.07	2	2		162.5	63.3		308.9	65.3		1	1		1	1		162.5	63.3		308.9
FALSE	High	[R].KTLNAGAYSKVVQER.[L]	2xAcetyl:2H(3) [K1; K10]; 1xAcetyl:2H(3) [N-Term]	P50897 2xAcetyl:2H(3) [K165; K174]; 1xAcetyl:2H(3) [N-Term]	FALSE		2.68809e-05	0	1	1	9	P50897	P50897 [165-179]	0	1799	0	0.286	-1.8	0.29917	0.07	0.252	0.288	0.286	-1.99	-1.8	-1.8	155.3	44.7	39.11	31.03	3	3	227.2	134.8	110.4	57.2	38.8	31.6	1	1	1	1	1	1	227.2	134.8	110.4	57.2	38.8
FALSE	High	[R].KTQKKKKKKASKTAENATSGETLEENEAGD.[-]	8xAcetyl:2H(3) [K1; K4; K5; K6; K7; K8; K9; K12]	Q9UQ80 8xAcetyl:2H(3) [K365; K368; K369; K370; K371; K372; K373; K376]	FALSE		7.37106e-05	0	1	1	19	Q9UQ80	Q9UQ80 [365-394]	0	3609.93	0	1.436	0.52	0.814578	29.18	1.718	0.986	1.436	0.78	-0.02	0.52	87	113	22.74	9.46	3	3	65.9	105	87.1	113.3	103.6	125.1	1	1	1	1	1	1	65.9	105	87.1	113.3	103.6
FALSE	High	[R].KTQTVCNFTDGALVQHQEWDGKESTITR.[K]	1xCarbamidomethyl [C6]; 2xAcetyl:2H(3) [K1; K22]	Q01469 1xCarbamidomethyl [C87]; 2xAcetyl:2H(3) [K82; K103]	FALSE		0.000130188	0	1	1	6	Q01469	Q01469 [82-109]	0	3339.62	0	3.147	1.65	0.723229	84.2	9.76	1.36	3.147	3.29	0.44	1.65	48.2	151.8	69.19	23.82	3	3	19.4	88.5	44.1	189.1	120.4	138.6	1	1	1	1	1	1	19.4	88.5	44.1	189.1	120.4
FALSE	High	[R].KTSLEDFYLDEER.[T]	1xAcetyl:2H(3) [K1]	P36955 1xAcetyl:2H(3) [K225]	TRUE	FBS	0.000255697	0	1	2	13	P36955	P36955 [225-237]	0	1689.8	0	1.419	0.51	0.851006	77.16	0.681	1.419	3.136	-0.56	0.51	1.65	82.7	117.3	49.62	22.91	3	3	129.1	81.8	44.8	87.9	116	140.4	1	1	1	1	1	1	129.1	81.8	44.8	87.9	116
FALSE	High	[R].KVESTKTDSR.[D]	2xAcetyl:2H(3) [K1; K6]	P23284 2xAcetyl:2H(3) [K181; K186]	FALSE		0.00455557	0	1	1	7	P23284	P23284 [181-190]	0	1240.67	0	0.433	-1.21	0.619977	19.17	0.134	0.433	0.739	-2.9	-1.21	-0.44	136.4	63.6	53.46	84.64	3	3	50.6	178.1	165.3	6.8	77.1	122.1	1	1	1	1	1	1	50.6	178.1	165.3	6.8	77.1
FALSE	High	[R].KVKAKSIVFHR.[K]	3xAcetyl:2H(3) [K1; K3; K5]	P62826 3xAcetyl:2H(3) [K130; K132; K134]	FALSE		0.00400549	0	1	1	15	P62826	P62826 [130-140]	0	1447.91	0	1.038	0.05	0.999636	37.38	0.545	1.299	1.038	-0.87	0.38	0.05	100.3	99.7	39.52	7.87	3	3	154.8	72.7	95	84.4	94.4	98.6	1	1	1	1	1	1	154.8	72.7	95	84.4	94.4
FALSE	High	[R].KVKAKSIVFHR.[K]	3xAcetyl:2H(3) [K1; K3; K5]; 1xAcetyl:2H(3) [N-Term]	P62826 3xAcetyl:2H(3) [K130; K132; K134]; 1xAcetyl:2H(3) [N-Term]	FALSE		0.00192132	0	1	1	10	P62826	P62826 [130-140]	0	1492.94	0	0.835	-0.26	0.967863	49.52	0.835	3.537	0.436	-0.26	1.82	-1.2	109	91	52.78	51.12	3	3	96.9	46	148.6	80.9	162.8	64.7	1	1	1	1	1	1	96.9	46	148.6	80.9	162.8
FALSE	High	[R].KVLGEKGKNIKIISKIENHEGVR.[R]	5xAcetyl:2H(3) [K1; K6; K8; K11; K15]	P14618 5xAcetyl:2H(3) [K256; K261; K263; K266; K270]	FALSE		4.17339e-05	0	1	1	2	P14618	P14618 [256-278]	0	2814.67	0	9.229	3.21	0.0334388	138.94	0.58	9.229	100	-0.79	3.21	6.64	57.6	142.4	126.65	13.15	2	3	213.9	11.8		124	108.8	141.6	1	1		1	1	1	213.9	11.8		124	108.8
FALSE	High	[R].KVNLGVGAYR.[T]	1xAcetyl:2H(3) [K1]; 1xAcetyl:2H(3) [N-Term]	P17174 1xAcetyl:2H(3) [K33]; 1xAcetyl:2H(3) [N-Term]	FALSE		0.0029365	0	1	1	12	P17174	P17174 [33-42]	0	1166.68	0	0.522	-0.94	0.651814	22.43	0.522	0.94	0.232	-0.94	-0.09	-2.11	131.4	68.6	21.53	43.84	3	3	144.4	99.5	152.1	75.3	93.5	35.2	1	1	1	1	1	1	144.4	99.5	152.1	75.3	93.5
FALSE	High	[RK].KVPQVSTPTLVEVSR.[SN]	1xAcetyl:2H(3) [K1]	P02769 1xAcetyl:2H(3) [K437]; P02768 1xAcetyl:2H(3) [K438]	TRUE	FBS	2.98923e-05	0	2	2	61	P02769; P02768	P02769 [437-451]; P02768 [438-452]	0	1684.97	0	0.634	-0.66	0.91293	25.74	3.75	0.36	0.634	1.91	-1.48	-0.66	122.4	77.6	62.06	37.28	3	3	33.4	164.8	132.9	125.4	59.2	84.2	1	1	1	1	1	1	33.4	164.8	132.9	125.4	59.2
FALSE	High	[RK].KVPQVSTPTLVEVSR.[SN]	1xAcetyl [N-Term]; 1xAcetyl:2H(3) [K1]	P02769 1xAcetyl [N-Term]; 1xAcetyl:2H(3) [K437]; P02768 1xAcetyl [N-Term]; 1xAcetyl:2H(3) [K438]	TRUE	FBS	0.00210419	0	2	2	24	P02769; P02768	P02769 [437-451]; P02768 [438-452]	0	1726.98	0	1.11	0.15	0.962407	112.81	1.954	0.244	1.11	0.97	-2.04	0.15	131.5	68.5	68.61	94.79	3	3	30.1	113.2	175.5	58.9	27.6	194.7	1	1	1	1	1	1	30.1	113.2	175.5	58.9	27.6
FALSE	High	[RK].KVPQVSTPTLVEVSR.[SN]	1xAcetyl:2H(3) [K1]; 1xAcetyl:2H(3) [N-Term]	P02769 1xAcetyl:2H(3) [K437]; 1xAcetyl:2H(3) [N-Term]; P02768 1xAcetyl:2H(3) [K438]; 1xAcetyl:2H(3) [N-Term]	TRUE	FBS	0.000483505	0	2	2	36	P02769; P02768	P02769 [437-451]; P02768 [438-452]	0	1730	0	0.855	-0.23	0.997817	23.6	1.893	0.668	0.855	0.92	-0.58	-0.23	102.3	97.7	29.68	25.93	3	3	66	109.3	122.2	125	73.1	104.4	1	1	1	1	1	1	66	109.3	122.2	125	73.1
FALSE	High	[L].KVSYGIGDEEHDQEGR.[V]	1xAcetyl:2H(3) [K1]; 1xAcetyl:2H(3) [N-Term]	P27695 1xAcetyl:2H(3) [K141]; 1xAcetyl:2H(3) [N-Term]	FALSE		0.000942303	0	1	1	4	P27695	P27695 [141-156]	0	1908.88	0	1.154	0.21	0.981356	77.54		1.906	0.699		0.93	-0.52	92.9	107.1	55.71	12.02	2	2		88.1	202.6		167.8	141.5		1	1		1	1		88.1	202.6		167.8
FALSE	High	[E].KVTKCCTESLVNR.[R]	2xCarbamidomethyl [C5; C6]; 2xAcetyl:2H(3) [K1; K4]	P02769 2xCarbamidomethyl [C499; C500]; 2xAcetyl:2H(3) [K495; K498]	TRUE	FBS	0.00107191	0	1	1	5	P02769	P02769 [495-507]	0	1684.86	0	0.74	-0.43	0.947181	59.72	1.671	0.74	0.195	0.74	-0.43	-2.36	167.3	32.7	93.05	123.76	3	3	11.4	244.7	120.2	19.1	181	23.5	1	1	1	1	1	1	11.4	244.7	120.2	19.1	181
FALSE	High	[T].KWSSKGNDIIAAAKR.[M]	3xAcetyl:2H(3) [K1; K5; K14]; 1xAcetyl:2H(3) [N-Term]	P18206 3xAcetyl:2H(3) [K979; K983; K992]; 1xAcetyl:2H(3) [N-Term]	FALSE		0.00365763	0	1	1	8	P18206	P18206 [979-993]	0	1825.04	0	1.794	0.84	0.92424	68.9	0.96	2.731	1.794	-0.06	1.45	0.84	56	144	73.85	38.22	3	3	147.6	55.2	37.5	141.7	150.7	67.2	1	1	1	1	1	1	147.6	55.2	37.5	141.7	150.7
FALSE	High	[G].KYDLDFKSPDDPSR.[Y]	2xAcetyl:2H(3) [K1; K7]	P06733 2xAcetyl:2H(3) [K256; K262]	FALSE		9.11504e-05	0	1	1	9	P06733	P06733 [256-269]	0	1772.86	0	0.417	-1.26	0.598741	25.22	0.01	0.961	0.417	-6.64	-0.06	-1.26	102.2	97.8	98.84	96.26	3	2	7.9	229.5	100.3		220.4	41.9	1	1	1		1	1	7.9	229.5	100.3		220.4
FALSE	High	[R].LAACGPPPVAPPAAVAAVAGGAR.[M]	1xCarbamidomethyl [C4]	P18065 1xCarbamidomethyl [C53]	FALSE		0.00145155	0	1	1	5	P18065	P18065 [50-72]	0	2041.1	0	0.756	-0.4	0.927269	11.69	0.756	0.652	1.802	-0.4	-0.62	0.85	121.1	78.9	80.54	62.58	3	3	204.8	96.1	29.2	154.8	62.6	52.6	1	1	1	1	1	1	204.8	96.1	29.2	154.8	62.6
FALSE	High	[R].IAAKFITHAPPGEFNEVFNDVR.[L]	1xAcetyl:2H(3) [K4]; 1xAcetyl:2H(3) [N-Term]	P52907 1xAcetyl:2H(3) [K19]; 1xAcetyl:2H(3) [N-Term]	FALSE		0.000659824	0	1	1	1	P52907	P52907 [16-37]	0	2562.33	0	1.125	0.17	0.993103	7.57		1.069	1.184		0.1	0.24	94.1	105.9	22.51	15.43	2	2		164.2	119.1		175.6	141.1		1	1		1	1		164.2	119.1		175.6
FALSE	High	[R].LDKACEPGVDYVYKTR.[L]	1xCarbamidomethyl [C5]; 2xAcetyl:2H(3) [K3; K14]	G3X7A5 1xCarbamidomethyl [C1535]; 2xAcetyl:2H(3) [K1533; K1544]	TRUE	FBS	0.000616296	0	1	3	3	G3X7A5	G3X7A5 [1531-1546]	0	2004	0	0.998	0	0.975159	24.2	6.808	0.835	0.998	2.77	-0.26	0	52	148	101.38	48.91	3	3	21.1	182.1	50.5	143.8	152.1	50.4	1	1	1	1	1	1	21.1	182.1	50.5	143.8	152.1
FALSE	High	[KR].KHEAFESDLAAHQDR.[V]	1xAcetyl:2H(3) [K1]	P12814 1xAcetyl:2H(3) [K436]; O43707 1xAcetyl:2H(3) [K455]	FALSE		1.25909e-05	0	2	3	19	P12814; O43707	P12814 [436-450]; O43707 [455-469]	0	1798.85	0	1.346	0.43	0.890756	8.76	1.346	2.214	1.266	0.43	1.15	0.34	85.3	114.7	38.14	13.44	3	3	87.1	47.2	107.7	117.3	104.4	136.3	1	1	1	1	1	1	87.1	47.2	107.7	117.3	104.4
FALSE	High	[R].KHAKGLHIVPR.[L]	2xAcetyl:2H(3) [K1; K4]; 1xAcetyl:2H(3) [N-Term]	Q9BWS9 2xAcetyl:2H(3) [K139; K142]; 1xAcetyl:2H(3) [N-Term]	FALSE		0.000847411	0	1	1	7	Q9BWS9	Q9BWS9 [139-149]	0	1390.86	0	0.165	-2.6	0.0900476	0.8	0.165	0.662	0.133	-2.6	-0.59	-2.91	151	49	75.13	47.22	3	3	301	62.7	128	49.8	41.5	17	1	1	1	1	1	1	301	62.7	128	49.8	41.5
FALSE	High	[L].HTLFGDELCKVASLR.[E]	1xCarbamidomethyl [C9]; 1xAcetyl:2H(3) [K10]; 1xAcetyl:2H(3) [N-Term]	P02769 1xCarbamidomethyl [C99]; 1xAcetyl:2H(3) [K100]; 1xAcetyl:2H(3) [N-Term]	TRUE	FBS	8.81545e-06	0	1	1	35	P02769	P02769 [91-105]	0	1835.96	0	0.743	-0.43	0.968478	10.26	2.071	0.65	0.743	1.05	-0.62	-0.43	108.1	91.9	18.57	55.76	3	3	82.6	116	88.8	171	75.5	66	1	1	1	1	1	1	82.6	116	88.8	171	75.5
FALSE	High	[K].HTLNQIDSVKVWPR.[R]	1xAcetyl:2H(3) [K10]; 1xAcetyl:2H(3) [N-Term]	P12763 1xAcetyl:2H(3) [K67]; 1xAcetyl:2H(3) [N-Term]	TRUE	FBS	4.93122e-05	0	1	1	15	P12763	P12763 [58-71]	0	1782.98	0	1.517	0.6	0.76168	33.95	3.382	1.17	1.517	1.76	0.23	0.6	91.8	108.2	19.49	69.8	3	3	72.1	72.6	50.4	243.7	84.9	76.4	1	1	1	1	1	1	72.1	72.6	50.4	243.7	84.9
FALSE	High	[R].HTPLSKLMKAYCER.[Q]	1xCarbamidomethyl [C12]; 2xAcetyl:2H(3) [K6; K9]	P61956 1xCarbamidomethyl [C48]; 2xAcetyl:2H(3) [K42; K45]	FALSE		0.00154228	0	1	2	6	P61956	P61956 [37-50]	0	1823.94	0	2.141	1.1	0.911352	9.56	2.707	2.003	2.141	1.44	1	1.1	53.9	146.1	25.63	18.41	3	3	53.6	79.8	51.5	145	159.9	110.2	1	1	1	1	1	1	53.6	79.8	51.5	145	159.9
FALSE	High	[R].HTPLSKLMKAYCER.[Q]	1xCarbamidomethyl [C12]; 2xAcetyl:2H(3) [K6; K9]; 1xAcetyl:2H(3) [N-Term]	P61956 1xCarbamidomethyl [C48]; 2xAcetyl:2H(3) [K42; K45]; 1xAcetyl:2H(3) [N-Term]	FALSE		6.43043e-05	0	1	2	22	P61956	P61956 [37-50]	0	1868.97	0	1.404	0.49	0.992688	18.6	1.404	0.883	1.58	0.49	-0.18	0.66	77.5	122.5	87.25	55.51	3	3	42.7	192.1	52.6	59.9	169.7	83	1	1	1	1	1	1	42.7	192.1	52.6	59.9	169.7
FALSE	High	[R].HVFGESDELIGQKVAH.[A]	1xAcetyl:2H(3) [K13]; 1xAcetyl:2H(3) [N-Term]	P60174 1xAcetyl:2H(3) [K150]; 1xAcetyl:2H(3) [N-Term]	FALSE		9.95283e-06	0	1	1	19	P60174	P60174 [138-153]	0	1855.95	0	0.721	-0.47	0.92452	32.18	0.721	1.183	0.42	-0.47	0.24	-1.25	140.9	59.1	52.07	90.16	3	3	45.4	154.7	129.8	32.7	182.9	54.5	1	1	1	1	1	1	45.4	154.7	129.8	32.7	182.9
FALSE	High	[R].HVGDLGNVTADKDGVADVSIEDSVISLSGDHCIIGR.[T]	1xCarbamidomethyl [C32]; 1xAcetyl:2H(3) [K12]	P00441 1xCarbamidomethyl [C112]; 1xAcetyl:2H(3) [K92]	FALSE		0.00216893	0	1	1	10	P00441	P00441 [81-116]	0	3765.84	0	0.904	-0.15	0.988196	28.9	100	0.904	0.689	6.64	-0.15	-0.54	119.8	80.2	3.92	26.12	2	3		148.1	140.2	81.2	134	96.5		1	1	1	1	1		148.1	140.2	81.2	134
FALSE	High	[R].HVGDLGNVTADKDGVADVSIEDSVISLSGDHCIIGR.[T]	1xCarbamidomethyl [C32]; 1xAcetyl:2H(3) [K12]; 1xAcetyl:2H(3) [N-Term]	P00441 1xCarbamidomethyl [C112]; 1xAcetyl:2H(3) [K92]; 1xAcetyl:2H(3) [N-Term]	FALSE		0.00196549	0	1	1	1	P00441	P00441 [81-116]	0	3810.87	0	0.01	-6.64	1.64805e-16	0		0.01			-6.64		200				1			600						1						600
FALSE	High	[F].HVGKTPIVGQPSIPGGPVR.[L]	1xAcetyl:2H(3) [K4]; 1xAcetyl:2H(3) [N-Term]	P12763 1xAcetyl:2H(3) [K333]; 1xAcetyl:2H(3) [N-Term]	TRUE	FBS	1.25521e-06	0	1	1	12	P12763	P12763 [330-348]	0	1986.14	0	2.097	1.07	0.97316	12.78	2.097	0.961	2.277	1.07	-0.06	1.19	86.9	113.1	150.46	157.12	3	3	180.1	11	6.3	377.6	10.6	14.3	1	1	1	1	1	1	180.1	11	6.3	377.6	10.6
FALSE	High	[R].HVGMAVAGLLADAR.[S]			FALSE		0.000304428	0	1	1	1	P25788	P25788 [73-86]	0	1380.74	0	0.697	-0.52	0.91293	9.75	0.603	14.542	0.697	-0.73	3.86	-0.52	68	132	105.16	64.27	3	3	188	12.8	58.4	113.3	186.7	40.7	1	1	1	1	1	1	188	12.8	58.4	113.3	186.7
FALSE	High	[K].HVVFGKVKEGMNIVEAMER.[F]	2xAcetyl:2H(3) [K6; K8]	P62937 2xAcetyl:2H(3) [K131; K133]	FALSE		0.000169768	0	1	1	16	P62937	P62937 [126-144]	0	2263.18	0	1.795	0.84	0.96164	23.96	4.635	1.505	1.795	2.21	0.59	0.84	79.8	120.2	108.25	97.26	3	3	10.6	43.6	154.2	49.1	65.7	276.8	1	1	1	1	1	1	10.6	43.6	154.2	49.1	65.7
FALSE	High	[K].HVVFGKVKEGMNIVEAMER.[F]	1xOxidation [M]; 2xAcetyl:2H(3) [K6; K8]	P62937 1xOxidation [M]; 2xAcetyl:2H(3) [K131; K133]	FALSE		0.000664846	0	1	1	4	P62937	P62937 [126-144]	0	2279.18	0	0.092	-3.44	0.0127547	5.72		0.01	0.848		-6.64	-0.24	39.5	160.5	129.62		2	1		13.8	317.2			269		1	1			1		13.8	317.2
FALSE	High	[K].HVVFGKVKEGMNIVEAMER.[F]	2xAcetyl:2H(3) [K6; K8]; 1xAcetyl:2H(3) [N-Term]	P62937 2xAcetyl:2H(3) [K131; K133]; 1xAcetyl:2H(3) [N-Term]	FALSE		0.00346882	0	1	1	12	P62937	P62937 [126-144]	0	2308.21	0	4.822	2.27	0.535506	19.07	4.201	10.291	4.822	2.07	3.36	2.27	31.7	168.3	20.11	34.06	3	3	34.5	23.2	27.3	144.7	238.8	131.6	1	1	1	1	1	1	34.5	23.2	27.3	144.7	238.8
FALSE	High	[R].HYGGLTGLNKAETAAKHGEAQVKIWR.[R]	3xAcetyl:2H(3) [K10; K16; K23]	P18669 3xAcetyl:2H(3) [K100; K106; K113]	FALSE		0.000739305	0	1	2	4	P18669	P18669 [91-116]	0	2970.59	0	0.69	-0.54	0.888262	38.63	0.312	1.683	0.69	-1.68	0.75	-0.54	78	122	105.64	41.82	3	3	289.3	49	52.7	90.2	82.5	36.3	1	1	1	1	1	1	289.3	49	52.7	90.2	82.5
FALSE	High	[K].HTGPNSPDTANDGFVR.[L]	1xAcetyl:2H(3) [N-Term]	P31943 1xAcetyl:2H(3) [N-Term]	FALSE		0.000168486	0	1	2	5	P31943	P31943 [99-114]	0	1729.8	0	7.475	2.9	0.281502	104.64	2.199	7.475	100	1.14	2.9	6.64	43	157	87	67.95	2	3	108	25.7		237.6	192.4	36.3	1	1		1	1	1	108	25.7		237.6	192.4
FALSE	High	[R].HYGGLTGLNKAETAAKHGEAQVKIWR.[R]	3xAcetyl:2H(3) [K10; K16; K23]; 1xAcetyl:2H(3) [N-Term]	P18669 3xAcetyl:2H(3) [K100; K106; K113]; 1xAcetyl:2H(3) [N-Term]	FALSE		6.3622e-06	0	1	2	2	P18669	P18669 [91-116]	0	3015.62	0	1.907	0.93	0.93455	70.95	100	1.907	0.994	6.64	0.93	-0.01	85.2	114.8	4.21	29.6	2	3		93.6	99.3	129.8	178.5	98.8		1	1	1	1	1		93.6	99.3	129.8	178.5
FALSE	High	[R].KADSDSEDKGEESKPKKKKEESEKPR.[G]	8xAcetyl:2H(3) [K1; K9; K14; K16; K17; K18; K19; K24]	P83916 8xAcetyl:2H(3) [K86; K94; K99; K101; K102; K103; K104; K109]	FALSE		0.000841011	0	1	1	18	P83916	P83916 [86-111]	0	3349.74	0	2.26	1.18	0.715554	10.83	2.426	1.705	2.26	1.28	0.77	1.18	61.3	138.7	14.75	4.47	3	3	58.1	75.6	60.3	140.9	128.9	136.2	1	1	1	1	1	1	58.1	75.6	60.3	140.9	128.9
FALSE	High	[R].KADVIKAAHLCAEAALR.[L]	1xCarbamidomethyl [C11]; 2xAcetyl:2H(3) [K1; K6]	Q9UQ80 1xCarbamidomethyl [C149]; 2xAcetyl:2H(3) [K139; K144]	FALSE		2.52984e-05	0	1	1	13	Q9UQ80	Q9UQ80 [139-155]	0	1927.07	0	1.11	0.15	0.995286	50.6	0.479	1.11	1.489	-1.06	0.15	0.57	94.8	105.2	58.76	3.44	3	3	182.4	82.4	62.8	87.4	91.5	93.5	1	1	1	1	1	1	182.4	82.4	62.8	87.4	91.5
FALSE	High	[R].KAEGDAKGDKAKVKDEPQR.[R]	5xAcetyl:2H(3) [K1; K7; K10; K12; K14]	P05204 5xAcetyl:2H(3) [K5; K11; K14; K16; K18]	FALSE		2.38091e-05	0	1	1	23	P05204	P05204 [5-23]	0	2295.24	0	0.633	-0.66	0.914729	33.32	2.866	0.278	0.633	1.52	-1.84	-0.66	119.4	80.6	63.52	45.9	3	3	33.5	142.6	176.3	96.2	39.7	111.7	1	1	1	1	1	1	33.5	142.6	176.3	96.2	39.7
FALSE	High	[R].KAEGDAKGDKAKVKDEPQRR.[S]	5xAcetyl:2H(3) [K1; K7; K10; K12; K14]	P05204 5xAcetyl:2H(3) [K5; K11; K14; K16; K18]	FALSE		0.000179025	0	1	1	46	P05204	P05204 [5-24]	1	2451.34	1	0.716	-0.48	0.939152	45.55	1.145	0.237	0.716	0.2	-2.08	-0.48	121.1	78.9	31.98	51.63	3	3	78.3	137.6	152.6	89.7	32.6	109.3	1	1	1	1	1	1	78.3	137.6	152.6	89.7	32.6
FALSE	High	[R].KAETKLAEAQIEELR.[Q]	2xAcetyl:2H(3) [K1; K5]	Q9NR28 2xAcetyl:2H(3) [K203; K207]	FALSE		3.81033e-05	0	1	1	1	Q9NR28	Q9NR28 [203-217]	0	1819.01	0	13.313	3.73	0.0150345	546.98	1.772	100		0.83	6.64		71.3	128.7		2.59	1	2	130.1			230.6	239.2		1			1	1		130.1			230.6	239.2
FALSE	High	[R].KAKDDATLSGKR.[M]	3xAcetyl:2H(3) [K1; K3; K11]	Q13442 3xAcetyl:2H(3) [K162; K164; K172]	FALSE		0.00346882	0	1	1	2	Q13442	Q13442 [162-173]	0	1424.81	0	2.538	1.34	0.92452	62.88	3.694	1.461	2.538	1.89	0.55	1.34	58.2	141.8	8.18	50.63	3	3	60.5	54	51.8	223.5	78.9	131.4	1	1	1	1	1	1	60.5	54	51.8	223.5	78.9
FALSE	High	[N].KAKNEQEHHAGGDSQKDIMQR.[Q]	3xAcetyl:2H(3) [K1; K3; K16]; 1xAcetyl:2H(3) [N-Term]	Q86SF2 3xAcetyl:2H(3) [K90; K92; K105]; 1xAcetyl:2H(3) [N-Term]	FALSE		0.000146985	0	1	1	2	Q86SF2	Q86SF2 [90-110]	0	2587.27	0	0.429	-1.22	0.571664	5.07		0.356	0.516		-1.49	-0.96	140	60	45.92	21.34	2	2		281.8	143.7		100.4	74.1		1	1		1	1		281.8	143.7		100.4
FALSE	High	[R].KALDIAENEMPGLMR.[M]	1xAcetyl:2H(3) [K1]	P23526 1xAcetyl:2H(3) [K20]	FALSE		1.79833e-05	0	1	1	16	P23526	P23526 [20-34]	0	1732.88	0	0.9	-0.15	0.998323	15.41	0.9	1.027	0.784	-0.15	0.04	-0.35	105.3	94.7	18.39	31.31	3	3	105.1	123	84.7	94.5	126.3	66.4	1	1	1	1	1	1	105.1	123	84.7	94.5	126.3
FALSE	High	[R].KALDIAENEMPGLMR.[M]	1xOxidation [M14]; 1xAcetyl:2H(3) [K1]	P23526 1xOxidation [M33]; 1xAcetyl:2H(3) [K20]	FALSE		0.000118862	0	1	1	7	P23526	P23526 [20-34]	0	1748.87	1	0.01	-6.64	1.64805e-16	0	0.01			-6.64			200				1		600						1						600
FALSE	High	[R].KAMEAVAAQGKAKK.[-]	4xAcetyl:2H(3) [K1; K11; K13; K14]	P18669 4xAcetyl:2H(3) [K241; K251; K253; K254]	FALSE		0.000978707	0	1	1	22	P18669	P18669 [241-254]	0	1610.93	0	0.729	-0.46	0.947183	1.84	0.796	0.729	0.712	-0.33	-0.46	-0.49	111.4	88.6	23.5	25.31	3	3	119.4	138.5	85.4	95	100.9	60.8	1	1	1	1	1	1	119.4	138.5	85.4	95	100.9
FALSE	High	[R].KAMEAVAAQGKAKK.[-]	1xOxidation [M3]; 4xAcetyl:2H(3) [K1; K11; K13; K14]	P18669 1xOxidation [M243]; 4xAcetyl:2H(3) [K241; K251; K253; K254]	FALSE		0.000200596	0	1	1	32	P18669	P18669 [241-254]	0	1626.93	0	0.685	-0.55	0.927269	16.71	0.521	1.13	0.685	-0.94	0.18	-0.55	118.7	81.3	20.08	19.27	3	3	129.6	88.4	127.3	67.5	100	87.2	1	1	1	1	1	1	129.6	88.4	127.3	67.5	100
FALSE	High	[R].KAMKGLGTDEESILTLLTSR.[S]	2xAcetyl:2H(3) [K1; K4]	P08758 2xAcetyl:2H(3) [K26; K29]	FALSE		1.37906e-05	0	1	1	38	P08758	P08758 [26-45]	0	2253.23	0	1.086	0.12	0.972143	30.49	1.086	0.409	1.309	0.12	-1.29	0.39	91.1	108.9	70.39	5.54	3	3	72.1	210.8	66	78.3	86.3	86.4	1	1	1	1	1	1	72.1	210.8	66	78.3	86.3
FALSE	High	[R].KAMKGLGTDEESILTLLTSR.[S]	1xOxidation [M3]; 2xAcetyl:2H(3) [K1; K4]	P08758 1xOxidation [M28]; 2xAcetyl:2H(3) [K26; K29]	FALSE		0.000860359	0	1	1	19	P08758	P08758 [26-45]	0	2269.22	0	0.334	-1.58	0.472026	8.12	0.334	0.17	1.085	-1.58	-2.56	0.12	151.2	48.8	34.33	79.53	3	3	107.8	191	111.6	36	32.4	121.2	1	1	1	1	1	1	107.8	191	111.6	36	32.4
FALSE	High	[Y].KAASDIAMTELPPTHPIR.[L]	1xAcetyl:2H(3) [K1]	P62258 1xAcetyl:2H(3) [K153]	FALSE		0.00326493	0	1	1	2	P62258	P62258 [153-170]	0	1993.06	0	1.368	0.45	0.994905	147.18	1.368	100	0.01	0.45	6.64	-6.64	51.1	148.9	13.43	81.78	2	2	72.2		59.6	98.7	369.5		1		1	1	1		72.2		59.6	98.7	369.5
FALSE	High	[L].HSIGKIGGAQNR.[S]	1xAcetyl:2H(3) [K5]; 1xAcetyl:2H(3) [N-Term]	P14174 1xAcetyl:2H(3) [K67]; 1xAcetyl:2H(3) [N-Term]	FALSE		0.0024116	0	1	1	4	P14174	P14174 [63-74]	0	1327.73	0	1.261	0.33	0.987065	80.05	0.58	1.261	3.446	-0.79	0.33	1.79	53.4	146.6	62.49	73.39	3	3	37.7	125.5	57.7	21.9	158.3	198.9	1	1	1	1	1	1	37.7	125.5	57.7	21.9	158.3
FALSE	High	[C].HRSPVEDVCTAKPR.[D]	1xCarbamidomethyl [C9]; 1xAcetyl:2H(3) [K12]	F1MSZ6 1xCarbamidomethyl [C41]; 1xAcetyl:2H(3) [K44]	TRUE	FBS	0.00119192	0	1	1	4	F1MSZ6	F1MSZ6 [33-46]	1	1696.86	0	0.645	-0.63	0.927269	2.53	0.645	0.591	0.672	-0.63	-0.76	-0.57	121.6	78.4	29.46	23.75	3	3	126.7	156.9	84.9	81.7	92.8	57	1	1	1	1	1	1	126.7	156.9	84.9	81.7	92.8
FALSE	High	[R].HRPELIEYDKLR.[K]	1xAcetyl:2H(3) [K10]; 1xAcetyl:2H(3) [N-Term]	O43707 1xAcetyl:2H(3) [K214]; 1xAcetyl:2H(3) [N-Term]	FALSE		0.00178112	0	1	1	10	O43707	O43707 [205-216]	0	1658.91	0	1.136	0.18	0.998039	12.19	1.136	1.042	2.212	0.18	0.06	1.15	84.7	115.3	16.29	36.54	3	3	74.4	98	75.1	84.4	102.1	166.1	1	1	1	1	1	1	74.4	98	75.1	84.4	102.1
FALSE	High	[R].HEENPINPGVDQCCTSSYSNR.[R]	2xCarbamidomethyl [C13; C14]	Q3SZ57 2xCarbamidomethyl [C501; C502]	TRUE	FBS	2.06138e-05	0	1	1	15	Q3SZ57	Q3SZ57 [489-509]	0	2464.03	0	0.777	-0.36	0.970975	5.04	3.454	0.733	0.777	1.79	-0.45	-0.36	105.5	94.5	44.4	39.36	3	3	46	124	101.5	158.8	90.9	78.8	1	1	1	1	1	1	46	124	101.5	158.8	90.9
FALSE	High	[L].HEKTPVSEKVTKCCTESLVNR.[R]	2xCarbamidomethyl [C13; C14]; 3xAcetyl:2H(3) [K3; K9; K12]; 1xAcetyl:2H(3) [N-Term]	P02769 2xCarbamidomethyl [C499; C500]; 3xAcetyl:2H(3) [K489; K495; K498]; 1xAcetyl:2H(3) [N-Term]	TRUE	FBS	6.57842e-05	0	1	1	12	P02769	P02769 [487-507]	0	2682.36	0	0.664	-0.59	0.924334	0.72	2.732	0.664	0.657	1.45	-0.59	-0.61	117.9	82.1	23.35	61.99	3	3	67.6	107.2	102.3	184.7	71.1	67.1	1	1	1	1	1	1	67.6	107.2	102.3	184.7	71.1
FALSE	High	[R].HEIAVMLLEGGANPDAKDHYEATAMHR.[A]	1xAcetyl:2H(3) [K17]	O75832 1xAcetyl:2H(3) [K135]	FALSE		6.72982e-05	0	1	1	4	O75832	O75832 [119-145]	0	3021.44	0	1.822	0.87	0.963859	34.18	1.822	2.241	0.266	0.87	1.16	-1.91	61.7	138.3	48.29	82.66	3	3	117.2	65	46.3	213.5	145.7	12.3	1	1	1	1	1	1	117.2	65	46.3	213.5	145.7
FALSE	High	[R].HGDLLLLPALR.[D]	1xAcetyl:2H(3) [N-Term]	Q96L58 1xAcetyl:2H(3) [N-Term]	FALSE		0.0019955	0	1	1	1	Q96L58	Q96L58 [116-126]	0	1262.77	0	0.678	-0.56	0.92452	0.02		0.677	0.678		-0.56	-0.56	119.2	80.8	9.05	9	2	2		190.3	167.4		128.9	113.5		1	1		1	1		190.3	167.4		128.9
FALSE	High	[R].HGESAWNLENR.[F]			FALSE		0.00363004	0	1	1	23	P18669	P18669 [11-21]	0	1312.6	0	0.686	-0.54	0.91293	22.28	1.116	0.686	0.467	0.16	-0.54	-1.1	102.8	97.2	25.23	45.82	3	3	105.5	145.3	89.7	117.8	99.7	41.9	1	1	1	1	1	1	105.5	145.3	89.7	117.8	99.7
FALSE	High	[R].HGESAWNLENR.[F]	1xAcetyl:2H(3) [N-Term]	P18669 1xAcetyl:2H(3) [N-Term]	FALSE		0.00321586	0	1	1	15	P18669	P18669 [11-21]	0	1357.63	0	1.119	0.16	0.994285	21.34	1.28	1.119	0.733	0.36	0.16	-0.45	93.9	106.1	8.03	23.49	3	3	89.3	104.3	101.2	114.4	116.7	74.2	1	1	1	1	1	1	89.3	104.3	101.2	114.4	116.7
FALSE	High	[R].HGGYKPSDEHKTDLNPDNLQGGDDLDPNYVLSSR.[V]	2xAcetyl:2H(3) [K5; K11]; 1xAcetyl:2H(3) [N-Term]	P12277 2xAcetyl:2H(3) [K101; K107]; 1xAcetyl:2H(3) [N-Term]	FALSE		0.000949474	0	1	1	17	P12277	P12277 [97-130]	0	3888.83	0	0.33	-1.6	0.190006	7.56	0.33	0.551	0.175	-1.6	-0.86	-2.51	150.4	49.6	28.09	70.19	3	3	164	172	98	54.1	94.8	17.1	1	1	1	1	1	1	164	172	98	54.1	94.8
FALSE	High	[Q].HGKVEIIANDQGNR.[T]	1xAcetyl:2H(3) [K3]; 1xAcetyl:2H(3) [N-Term]	P54652 1xAcetyl:2H(3) [K26]; 1xAcetyl:2H(3) [N-Term]; P11142 1xAcetyl:2H(3) [K25]; 1xAcetyl:2H(3) [N-Term]; P0DMV9 1xAcetyl:2H(3) [K25]; 1xAcetyl:2H(3) [N-Term]	FALSE		5.96076e-05	0	3	4	17	P54652; P11142; P0DMV9	P54652 [24-37]; P11142 [23-36]; P0DMV9 [23-36]	0	1640.86	0	2.242	1.16	0.290453	59.28	1.346	3.76	2.242	0.43	1.91	1.16	65.8	134.2	35.43	18.16	3	3	81.2	38.1	70.3	109.3	143.4	157.6	1	1	1	1	1	1	81.2	38.1	70.3	109.3	143.4
FALSE	High	[G].HGVEGGNVAKPDPEVTER.[C]	1xAcetyl:2H(3) [K10]; 1xAcetyl:2H(3) [N-Term]	Q3SZV7 1xAcetyl:2H(3) [K43]; 1xAcetyl:2H(3) [N-Term]	TRUE	FBS	8.27094e-07	0	1	1	6	Q3SZV7	Q3SZV7 [34-51]	0	1980.99	0	0.9	-0.15	0.984287	58.48	1.845	0.461	0.9	0.88	-1.12	-0.15	105.3	94.7	14.1	52.36	3	3	84.4	112	103.3	155.7	51.6	92.9	1	1	1	1	1	1	84.4	112	103.3	155.7	51.6
FALSE	High	[R].HGVIVAADSR.[A]	1xAcetyl:2H(3) [N-Term]	P28074 1xAcetyl:2H(3) [N-Term]	FALSE		0.00256226	0	1	1	9	P28074	P28074 [69-78]	0	1069.58	0	1.279	0.36	0.971933	26.32	1.279	1.052	100	0.36	0.07	6.64	93.8	106.2	10.32	22.07	2	3	109.4	126.7		140	133.3	90.6	1	1		1	1	1	109.4	126.7		140	133.3
FALSE	High	[Y].HKPDQQKLQALKDTANR.[L]	3xAcetyl:2H(3) [K2; K7; K12]; 1xAcetyl:2H(3) [N-Term]	P29401 3xAcetyl:2H(3) [K6; K11; K16]; 1xAcetyl:2H(3) [N-Term]	FALSE		0.0016891	0	1	1	2	P29401	P29401 [5-21]	0	2171.2	0	1.069	0.1	0.999983	80.66	0.242	1.651	1.069	-2.04	0.72	0.1	75.5	124.5	81.53	84.29	3	3	17.1	89.8	164.6	4.1	148.3	176	1	1	1	1	1	1	17.1	89.8	164.6	4.1	148.3
FALSE	High	[R].HIDCAHVYQNENEVGVAIQEKLR.[E]	1xCarbamidomethyl [C4]; 1xAcetyl:2H(3) [K21]	P15121 1xCarbamidomethyl [C45]; 1xAcetyl:2H(3) [K62]	FALSE		0.00130542	0	1	1	3	P15121	P15121 [42-64]	0	2767.37	0	0.212	-2.24	0.230351	4.16	0.212	0.344	0.01	-2.24	-1.54	-6.64	156	44	41.55	39.24	3	2	192.5	209.5	85.1	40.8	72.1		1	1	1	1	1		192.5	209.5	85.1	40.8	72.1
FALSE	High	[R].HIDCAHVYQNENEVGVAIQEKLR.[E]	1xCarbamidomethyl [C4]; 1xAcetyl:2H(3) [K21]; 1xAcetyl:2H(3) [N-Term]	P15121 1xCarbamidomethyl [C45]; 1xAcetyl:2H(3) [K62]; 1xAcetyl:2H(3) [N-Term]	FALSE		9.29612e-06	0	1	1	7	P15121	P15121 [42-64]	0	2812.4	0	0.514	-0.96	0.805518	0.93	0.502	0.514	0.631	-0.99	-0.96	-0.66	122.6	77.4	41.83	37.92	3	3	89.9	191.3	107.4	45.2	98.4	67.8	1	1	1	1	1	1	89.9	191.3	107.4	45.2	98.4
FALSE	High	[E].HIDEVQNEIDR.[L]	1xAcetyl:2H(3) [N-Term]	Q01105 1xAcetyl:2H(3) [N-Term]	FALSE		0.0039453	0	1	2	7	Q01105	Q01105 [47-57]	0	1412.68	0	1.702	0.77	0.963074	2.49	0.133	1.702	1.73	-2.91	0.77	0.79	73.2	126.8	15.07	79.31	3	3	74.3	100.8	89.2	9.9	171.5	154.4	1	1	1	1	1	1	74.3	100.8	89.2	9.9	171.5
FALSE	High	[T].HLGGEDFDNR.[LM]	1xAcetyl:2H(3) [N-Term]	P17066 1xAcetyl:2H(3) [N-Term]; P54652 1xAcetyl:2H(3) [N-Term]; P11142 1xAcetyl:2H(3) [N-Term]; P0DMV9 1xAcetyl:2H(3) [N-Term]	FALSE		0.00228705	0	4	6	7	P17066; P54652; P11142; P0DMV9	P17066 [229-238]; P54652 [230-239]; P11142 [227-236]; P0DMV9 [227-236]	0	1204.54	0	1.797	0.85	0.795259	7.16	1.71	1.797	2.408	0.77	0.85	1.27	66.6	133.4	13.85	8.77	3	3	78	66.7	59.3	133.4	119.8	142.8	1	1	1	1	1	1	78	66.7	59.3	133.4	119.8
FALSE	High	[G].HILLHDFLLVPR.[E]	1xAcetyl:2H(3) [N-Term]	P10253 1xAcetyl:2H(3) [N-Term]	FALSE		0.000620987	0	1	1	6	P10253	P10253 [29-40]	0	1517.9	0	0.075	-3.73	0.00567811	0	0.075			-3.73			186	14			1	1	558.1			41.9			1			1			558.1			41.9
FALSE	High	[R].HLNFLTSEQALADFAELIKHLKR.[T]	2xAcetyl:2H(3) [K19; K22]	P42785 2xAcetyl:2H(3) [K159; K162]	FALSE		9.69898e-07	0	1	1	3	P42785	P42785 [141-163]	0	2784.53	0
FALSE	High	[R].HITIFSPEGR.[L]	1xAcetyl:2H(3) [N-Term]	P60900 1xAcetyl:2H(3) [N-Term]	FALSE		0.00287054	0	1	1	9	P60900	P60900 [12-21]	0	1201.64	0	1.325	0.41	0.992781	56.48	1.325	5.213	0.82	0.41	2.38	-0.29	86	114	12.91	92.79	3	3	55.6	55.5	69	73.7	289.6	56.6	1	1	1	1	1	1	55.6	55.5	69	73.7	289.6
FALSE	High	[R].HLYPNTPYAYTFWTYMMNAR.[S]			FALSE		0.00100884	0	1	1	4	P27695	P27695 [255-274]	0	2540.15	0	0.387	-1.37	0.507363	0		0.387			-1.37		144.2	55.8			1	1		432.7			167.3			1			1			432.7			167.3
FALSE	High	[R].HLYVLVNLCEKPYPLHR.[I]	1xCarbamidomethyl [C9]; 1xAcetyl:2H(3) [K11]	Q99538 1xCarbamidomethyl [C412]; 1xAcetyl:2H(3) [K414]	FALSE		5.3034e-06	0	1	1	1	Q99538	Q99538 [404-420]	0	2196.18	0	0.242	-2.05	0.125703	2.1		0.307	0.19		-1.7	-2.4	161.1	38.9	21.78	53.18	2	2		275.3	201.8		84.6	38.3		1	1		1	1		275.3	201.8		84.6
FALSE	High	[N].HMAKVLTPELYAELR.[A]	1xAcetyl:2H(3) [K4]; 1xAcetyl:2H(3) [N-Term]	P12277 1xAcetyl:2H(3) [K32]; 1xAcetyl:2H(3) [N-Term]	FALSE		5.04471e-05	0	1	1	9	P12277	P12277 [29-43]	0	1861.02	0	0.965	-0.05	0.992688	53.37	1.745	0.965	0.592	0.8	-0.05	-0.76	101.8	98.2	21.08	33.21	3	3	78.7	97.7	120.4	137.4	94.3	71.3	1	1	1	1	1	1	78.7	97.7	120.4	137.4	94.3
FALSE	High	[R].HNGTGGKSIYGEKF.[E]	2xAcetyl:2H(3) [K7; K13]; 1xAcetyl:2H(3) [N-Term]	P62937 2xAcetyl:2H(3) [K76; K82]; 1xAcetyl:2H(3) [N-Term]	FALSE		0.00377009	0	1	1	15	P62937	P62937 [70-83]	0	1629.82	0	0.925	-0.11	0.987505	17.82	0.925	1.568	0.795	-0.11	0.65	-0.33	106.1	93.9	9.47	36.64	3	3	87.3	94.6	105.3	80.7	148.4	83.7	1	1	1	1	1	1	87.3	94.6	105.3	80.7	148.4
FALSE	High	[R].HNGTGGKSIYGEKFEDENFILKH.[T]	3xAcetyl:2H(3) [K7; K13; K22]; 1xAcetyl:2H(3) [N-Term]	P62937 3xAcetyl:2H(3) [K76; K82; K91]; 1xAcetyl:2H(3) [N-Term]	FALSE		0.000341108	0	1	1	9	P62937	P62937 [70-92]	0	2800.4	0	1.22	0.29	0.997817	0.53	100	1.22	1.216	6.64	0.29	0.28	101.9	98.1	32.95	35.16	2	3		88.2	141.8	90	107.6	172.4		1	1	1	1	1		88.2	141.8	90	107.6
FALSE	High	[R].HPEYAVSVLLR.[L]	1xAcetyl:2H(3) [N-Term]	P02769 1xAcetyl:2H(3) [N-Term]	TRUE	FBS	0.00452122	0	1	1	17	P02769	P02769 [361-371]	0	1328.74	0	0.571	-0.81	0.830796	26.21	3.166	0.261	0.571	1.66	-1.94	-0.81	127.3	72.7	58.87	58.31	3	3	44.8	179.3	119.1	141.9	46.9	68	1	1	1	1	1	1	44.8	179.3	119.1	141.9	46.9
FALSE	High	[R].HPHDIIDDINSGAVECPAS.[-]	1xCarbamidomethyl [C16]	P30050 1xCarbamidomethyl [C162]	FALSE		0.00178112	0	1	1	8	P30050	P30050 [147-165]	0	2046.92	0	8.579	3.1	0.0447605	99.77	2.806	100	8.579	1.49	6.64	3.1	15.7	184.3	126.23	67.86	2	3	79.3		4.5	222.4	255.3	38.6	1		1	1	1	1	79.3		4.5	222.4	255.3
FALSE	High	[R].HQGVMVGMGQKDSYVGDEAQSKR.[G]	2xAcetyl:2H(3) [K11; K22]	P60712 2xAcetyl:2H(3) [K50; K61]; P63261 2xAcetyl:2H(3) [K50; K61]	TRUE	FBS	0.00262115	0	2	6	4	P60712; P63261	P60712 [40-62]; P63261 [40-62]	0	2597.24	0	100	6.64	1.64805e-16	0	4.066	100	100	2.02	6.64	6.64	43.5	156.5		33.44	1	3	56.2			228.5	202.3	112.9	1			1	1	1	56.2			228.5	202.3
FALSE	High	[R].HQGVMVGMGQKDSYVGDEAQSKR.[G]	2xAcetyl:2H(3) [K11; K22]; 1xAcetyl:2H(3) [N-Term]	P60712 2xAcetyl:2H(3) [K50; K61]; 1xAcetyl:2H(3) [N-Term]; P63261 2xAcetyl:2H(3) [K50; K61]; 1xAcetyl:2H(3) [N-Term]	TRUE	FBS	0.000828354	0	2	6	2	P60712; P63261	P60712 [40-62]; P63261 [40-62]	0	2642.26	0	15.659	3.97	0.00216883	119.15	15.659	3.074	100	3.97	1.62	6.64	34	166	61.26	79.03	2	3	20.6	52		322	159.9	45.5	1	1		1	1	1	20.6	52		322	159.9
FALSE	High	[S].HQNLKEFALTNPEKSSTKETER.[K]	3xAcetyl:2H(3) [K5; K14; K18]; 1xAcetyl:2H(3) [N-Term]	Q9H173 3xAcetyl:2H(3) [K36; K45; K49]; 1xAcetyl:2H(3) [N-Term]	FALSE		1.56884e-05	0	1	1	5	Q9H173	Q9H173 [32-53]	0	2767.43	0	0.692	-0.53	0.92452	27.51	0.424	1.378	0.692	-1.24	0.46	-0.53	114	86	89.16	38.67	3	3	253.4	43.7	79.9	107.4	60.3	55.3	1	1	1	1	1	1	253.4	43.7	79.9	107.4	60.3
FALSE	High	[R].HQQTITIPAR.[S]	1xAcetyl:2H(3) [N-Term]	G3X7A5 1xAcetyl:2H(3) [N-Term]	TRUE	FBS	0.00331475	0	1	2	3	G3X7A5	G3X7A5 [881-890]	0	1209.68	0	1.343	0.43	0.99381	18.22	2.041	1.178	1.343	1.03	0.24	0.43	87.1	112.9	63.37	92.37	3	3	127.8	47.6	45.9	260.8	56.1	61.7	1	1	1	1	1	1	127.8	47.6	45.9	260.8	56.1
FALSE	High	[R].KAMKGLGTDEESILTLLTSR.[S]	2xAcetyl:2H(3) [K1; K4]; 1xAcetyl:2H(3) [N-Term]	P08758 2xAcetyl:2H(3) [K26; K29]; 1xAcetyl:2H(3) [N-Term]	FALSE		0.00121013	0	1	1	22	P08758	P08758 [26-45]	0	2298.26	0	0.881	-0.18	0.986008	2.99	1.3	0.858	0.881	0.38	-0.22	-0.18	106.3	93.7	37.21	19.34	3	3	61.8	137.3	107.8	80.3	117.8	94.9	1	1	1	1	1	1	61.8	137.3	107.8	80.3	117.8
FALSE	High	[R].KAMSKLGLR.[Q]	2xAcetyl:2H(3) [K1; K5]; 1xAcetyl:2H(3) [N-Term]	E9PAV3 2xAcetyl:2H(3) [K1941; K1945]; 1xAcetyl:2H(3) [N-Term]	FALSE		0.0040975	0	1	3	14	E9PAV3	E9PAV3 [1941-1949]	0	1138.7	0	1.009	0.01	0.999636	62.09	1.009	3.821	0.587	0.01	1.93	-0.77	59.9	140.1	66.32	58.7	3	3	148	41.8	63.8	149.4	159.6	37.4	1	1	1	1	1	1	148	41.8	63.8	149.4	159.6
FALSE	High	[G].KANKITITNDKGR.[L]	3xAcetyl:2H(3) [K1; K4; K11]	P17066 3xAcetyl:2H(3) [K499; K502; K509]; P0DMV9 3xAcetyl:2H(3) [K497; K500; K507]	FALSE		0.000479853	0	2	2	1	P17066; P0DMV9	P17066 [499-511]; P0DMV9 [497-509]	0	1593.93	0	3.012	1.59	0.760218	66.38		4.649	1.952		2.22	0.96	49.8	150.2	38.67	86.76	2	2		81.8	46.7		380.4	91.1		1	1		1	1		81.8	46.7		380.4
FALSE	High	[R].KANKSSELVSANR.[L]	2xAcetyl:2H(3) [K1; K4]	F1MSZ6 2xAcetyl:2H(3) [K166; K169]	TRUE	FBS	0.000949474	0	1	1	1	F1MSZ6	F1MSZ6 [166-178]	0	1493.82	0	0.49	-1.03	0.570166	12.38	0.49	0.66	0.01	-1.03	-0.6	-6.64	67.2	132.8	142.53	112.99	3	2	357.3	29.6	18.3	175.1	19.6		1	1	1	1	1		357.3	29.6	18.3	175.1	19.6
FALSE	High	[K].KENFEVLCKDGTR.[K]	1xCarbamidomethyl [C8]; 2xAcetyl:2H(3) [K1; K9]	G3X6N3 1xCarbamidomethyl [C589]; 2xAcetyl:2H(3) [K582; K590]; Q29443 1xCarbamidomethyl [C589]; 2xAcetyl:2H(3) [K582; K590]	TRUE	FBS	0.000640111	0	2	2	3	G3X6N3; Q29443	G3X6N3 [582-594]; Q29443 [582-594]	0	1685.84	0	0.226	-2.14	0.135065	7.26	0.01	0.226	1.004	-6.64	-2.14	0.01	115.7	84.3	97.25	43.97	3	2	13.7	281.2	120.5		63.6	121	1	1	1		1	1	13.7	281.2	120.5		63.6
FALSE	High	[K].KENLKAAQEEYVKR.[A]	3xAcetyl:2H(3) [K1; K5; K13]	P04075 3xAcetyl:2H(3) [K318; K322; K330]	FALSE		7.89178e-05	0	1	1	7	P04075	P04075 [318-331]	0	1841.01	0	0.748	-0.42	0.927269	43.87		0.451	1.242		-1.15	0.31	114.4	85.6	49.9	99.56	2	2		97.8	204.4		44.1	253.8		1	1		1	1		97.8	204.4		44.1
FALSE	High	[R].KEPDKKEGKKEVESKR.[K]	6xAcetyl:2H(3) [K1; K5; K6; K9; K10; K15]	O75475 6xAcetyl:2H(3) [K246; K250; K251; K254; K255; K260]	FALSE		0.000406114	0	1	1	1	O75475	O75475 [246-261]	0	2185.24	0	4.486	2.17	0.656513	319.9		0.989	20.349		-0.02	4.35	36.5	163.5	61.54	110.33	2	2		57.7	22.7		57.1	462.4		1	1		1	1		57.7	22.7		57.1
FALSE	High	[R].KEQTADGVAVIPVLQR.[T]	1xAcetyl:2H(3) [K1]	Q9UKK9 1xAcetyl:2H(3) [K55]	FALSE		2.60777e-05	0	1	1	42	Q9UKK9	Q9UKK9 [55-70]	0	1769	0	0.517	-0.95	0.727968	1.97	0.491	0.617	0.517	-1.03	-0.7	-0.95	124.5	75.5	29.22	29.21	3	3	165.6	133.9	90	81.3	82.7	46.5	1	1	1	1	1	1	165.6	133.9	90	81.3	82.7
FALSE	High	[R].KEQTKLKWMQSELNVEEVVNDR.[S]	3xAcetyl:2H(3) [K1; K5; K7]	Q4VC31 3xAcetyl:2H(3) [K104; K108; K110]	FALSE		0.00379875	0	1	1	3	Q4VC31	Q4VC31 [104-125]	0	2838.47	0	100	6.64	1.64805e-16	0	100	100	4.192	6.64	6.64	2.07	38.5	161.5		26.84	1	3			38.6	154.8	245	161.6			1	1	1	1			38.6	154.8	245
FALSE	High	[R].KETNNAAIIMKIDKDKR.[L]	4xAcetyl:2H(3) [K1; K11; K14; K16]	P60983 4xAcetyl:2H(3) [K25; K35; K38; K40]	FALSE		0.000148104	0	1	1	7	P60983	P60983 [25-41]	0	2168.21	0	2.402	1.26	0.886119	13.55	2.402	2.622	1.919	1.26	1.39	0.94	68.5	131.5	29.68	29.83	3	3	77.7	41.7	63.3	186.5	109.4	121.4	1	1	1	1	1	1	77.7	41.7	63.3	186.5	109.4
FALSE	High	[R].KFAADAVKLER.[M]	2xAcetyl:2H(3) [K1; K8]	P37837 2xAcetyl:2H(3) [K314; K321]	FALSE		0.00295882	0	1	1	10	P37837	P37837 [314-324]	0	1337.77	0	0.777	-0.36	0.967863	14.15	0.956	0.654	0.777	-0.06	-0.61	-0.36	113.4	86.6	36.71	22.25	3	3	67.1	147.6	126.4	64.1	96.6	98.2	1	1	1	1	1	1	67.1	147.6	126.4	64.1	96.6
FALSE	High	[R].KFFVGGNWKMNGR.[K]	2xAcetyl:2H(3) [K1; K9]	P60174 2xAcetyl:2H(3) [K43; K51]	FALSE		0.000479853	0	1	1	12	P60174	P60174 [43-55]	0	1630.84	0	0.454	-1.14	0.497806	9.32	0.316	1.22	0.454	-1.66	0.29	-1.14	126.2	73.8	52.27	28.94	3	3	207.1	74.1	112.1	65.5	90.4	50.9	1	1	1	1	1	1	207.1	74.1	112.1	65.5	90.4
FALSE	High	[R].KFFVGGNWKMNGR.[K]	1xOxidation [M10]; 2xAcetyl:2H(3) [K1; K9]	P60174 1xOxidation [M52]; 2xAcetyl:2H(3) [K43; K51]	FALSE		0.000406114	0	1	1	11	P60174	P60174 [43-55]	0	1646.84	0	0.435	-1.2	0.48986	21.69	0.099	1.337	0.435	-3.34	0.42	-1.2	153.7	46.3	76.69	43.42	3	3	269.7	34.9	154.8	26.6	46.6	67.4	1	1	1	1	1	1	269.7	34.9	154.8	26.6	46.6
FALSE	High	[R].KFFVGGNWKMNGR.[K]	1xOxidation [M10]; 2xAcetyl:2H(3) [K1; K9]; 1xAcetyl:2H(3) [N-Term]	P60174 1xOxidation [M52]; 2xAcetyl:2H(3) [K43; K51]; 1xAcetyl:2H(3) [N-Term]	FALSE		0.00252373	0	1	1	18	P60174	P60174 [43-55]	0	1691.87	0	0.886	-0.17	0.988196	26.99	0.681	1.511	0.886	-0.55	0.6	-0.17	99.3	100.7	88.13	80.38	3	3	61.4	41.2	208.6	41.8	62.2	184.9	1	1	1	1	1	1	61.4	41.2	208.6	41.8	62.2
FALSE	High	[R].KFGVTDFPSCYLLFR.[N]	1xCarbamidomethyl [C10]; 1xAcetyl:2H(3) [K1]; 1xAcetyl:2H(3) [N-Term]	O00391 1xCarbamidomethyl [C237]; 1xAcetyl:2H(3) [K228]; 1xAcetyl:2H(3) [N-Term]	FALSE		8.32208e-05	0	1	1	3	O00391	O00391 [228-242]	0	1939.99	0	1.205	0.27	0.989618	26.27	0.096	1.205	1.419	-3.38	0.27	0.5	98.9	101.1	18.55	77.25	3	3	117.6	120.8	84.7	11.3	145.5	120.1	1	1	1	1	1	1	117.6	120.8	84.7	11.3	145.5
FALSE	High	[R].KFKLICSELNGR.[Y]	1xCarbamidomethyl [C6]; 2xAcetyl:2H(3) [K1; K3]	O94985 1xCarbamidomethyl [C794]; 2xAcetyl:2H(3) [K789; K791]	FALSE		0.000767871	0	1	1	3	O94985	O94985 [789-800]	0	1554.86	0	1.048	0.07	0.999636	30.88	0.829	1.048	100	-0.27	0.07	6.64	104.9	95.1	61.79	35.13	2	3	187.6	73.5		155.5	77	106.4	1	1		1	1	1	187.6	73.5		155.5	77
FALSE	High	[R].KFKLICSELNGR.[Y]	1xCarbamidomethyl [C6]; 2xAcetyl:2H(3) [K1; K3]; 1xAcetyl:2H(3) [N-Term]	O94985 1xCarbamidomethyl [C794]; 2xAcetyl:2H(3) [K789; K791]; 1xAcetyl:2H(3) [N-Term]	FALSE		0.00041546	0	1	1	4	O94985	O94985 [789-800]	0	1599.89	0	1.063	0.09	0.993103	17.17	0.371	1.063	1.187	-1.43	0.09	0.25	101.1	98.9	43.15	25.01	3	3	171.1	82.3	89.5	63.4	87.5	106.2	1	1	1	1	1	1	171.1	82.3	89.5	63.4	87.5
FALSE	High	[R].KFLDGNELTLADCNLLPKLHIVQVVCKKYR.[G]	2xCarbamidomethyl [C13; C26]; 4xAcetyl:2H(3) [K1; K18; K27; K28]	O00299 2xCarbamidomethyl [C178; C191]; 4xAcetyl:2H(3) [K166; K183; K192; K193]	FALSE		0.000106081	0	1	1	2	O00299	O00299 [166-195]	0	3765.06	0	0.027	-5.23	7.38429e-06	0.12		0.071	0.01		-3.82	-6.64	154.3	45.7	126.25		2	1		532.3	30.2		37.6			1	1		1			532.3	30.2		37.6
FALSE	High	[K].KFWGKYLYEIAR.[R]	2xAcetyl:2H(3) [K1; K5]	P02769 2xAcetyl:2H(3) [K156; K160]	TRUE	FBS	0.00133544	0	1	1	3	P02769	P02769 [156-167]	0	1663.91	0	0.368	-1.44	0.609224	15.62		0.18	0.753		-2.48	-0.41	146.2	53.8	109.43	42.97	2	2		427.5	54.5		76.9	41		1	1		1	1		427.5	54.5		76.9
FALSE	High	[K].KFWGKYLYEIAR.[R]	2xAcetyl:2H(3) [K1; K5]; 1xAcetyl:2H(3) [N-Term]	P02769 2xAcetyl:2H(3) [K156; K160]; 1xAcetyl:2H(3) [N-Term]	TRUE	FBS	0.00132536	0	1	1	2	P02769	P02769 [156-167]	0	1708.94	0	0.325	-1.62	0.330248	11.91		0.161	0.656		-2.64	-0.61	151	49	86.93	2.03	2	2		385.6	92		62.1	60.3		1	1		1	1		385.6	92		62.1
FALSE	High	[D].KGACLLPKIETMR.[E]	1xCarbamidomethyl [C4]; 2xAcetyl:2H(3) [K1; K8]	P02769 1xCarbamidomethyl [C200]; 2xAcetyl:2H(3) [K197; K204]	TRUE	FBS	0.000330915	0	1	1	6	P02769	P02769 [197-209]	0	1606.89	0	0.573	-0.8	0.84071	15.02	100	0.573	0.396	6.64	-0.8	-1.34	89.4	110.6	106.4	74.78	2	3		268.4	37.9	124.9	153.8	15		1	1	1	1	1		268.4	37.9	124.9	153.8
FALSE	High	[R].KGANEATKTLNR.[G]	2xAcetyl:2H(3) [K1; K8]	P55769 2xAcetyl:2H(3) [K37; K44]	FALSE		0.000978707	0	1	1	13	P55769	P55769 [37-48]	0	1392.77	0	1.616	0.69	0.986492	20.42	1.393	1.616	2.172	0.48	0.69	1.12	68	132	52.29	33.6	3	3	122.3	56.4	50.4	170.4	91.1	109.4	1	1	1	1	1	1	122.3	56.4	50.4	170.4	91.1
FALSE	High	[R].KGEFETGFEKGGQTR.[E]	2xAcetyl:2H(3) [K1; K10]	Q8IYD1 2xAcetyl:2H(3) [K316; K325]	FALSE		5.12182e-05	0	1	2	14	Q8IYD1	Q8IYD1 [316-330]	0	1760.87	0	4.364	2.13	0.146689	86.64	1.814	4.364	7.221	0.86	2.13	2.85	37.3	162.7	21.22	42.81	3	3	47.1	40.4	30.5	85.4	176.3	220.3	1	1	1	1	1	1	47.1	40.4	30.5	85.4	176.3
FALSE	High	[G].KGGNEESTKTGNAGSR.[L]	2xAcetyl:2H(3) [K1; K9]	P00441 2xAcetyl:2H(3) [K129; K137]	FALSE		0.000412321	0	1	1	1	P00441	P00441 [129-144]	0	1682.82	0	0.298	-1.75	0.405096	0		0.298			-1.75		154.1	45.9			1	1		462.3			137.7			1			1			462.3			137.7
FALSE	High	[G].KGKDASGNKVKAEPAKIEAFR.[A]	5xAcetyl:2H(3) [K1; K3; K9; K11; K16]	P00558 5xAcetyl:2H(3) [K131; K133; K139; K141; K146]	FALSE		0.00412863	0	1	1	2	P00558	P00558 [131-151]	0	2469.39	0	0.723	-0.47	0.92452	28.89		1.041	0.502		0.06	-1	116.1	83.9	74.98	104.97	2	2		239.8	73.6		249.6	36.9		1	1		1	1		239.8	73.6		249.6
FALSE	High	[R].KGKVFQEPLFYEAPR.[S]	2xAcetyl:2H(3) [K1; K3]	P07711 2xAcetyl:2H(3) [K102; K104]	FALSE		0.000102911	0	1	1	1	P07711	P07711 [102-116]	0	1899.03	0	0.408	-1.29	0.58139	3.8	0.408	0.471	0.147	-1.29	-1.09	-2.77	169.5	30.5	39.87	67.78	3	3	81.3	186.5	184.1	33.2	87.8	27.1	1	1	1	1	1	1	81.3	186.5	184.1	33.2	87.8
FALSE	High	[R].KGKVFQEPLFYEAPR.[S]	2xAcetyl:2H(3) [K1; K3]; 1xAcetyl:2H(3) [N-Term]	P07711 2xAcetyl:2H(3) [K102; K104]; 1xAcetyl:2H(3) [N-Term]	FALSE		0.000341108	0	1	1	10	P07711	P07711 [102-116]	0	1944.06	0	0.376	-1.41	0.426738	0.4	0.405	0.376	0.368	-1.3	-1.41	-1.44	146.1	53.9	5.62	10.48	3	3	153.5	137.7	142.4	62.2	51.7	52.5	1	1	1	1	1	1	153.5	137.7	142.4	62.2	51.7
FALSE	High	[R].KGLHHKILLANFLAQTEALMR.[G]	2xAcetyl:2H(3) [K1; K6]	P06744 2xAcetyl:2H(3) [K418; K423]	FALSE		7.37106e-05	0	1	1	23	P06744	P06744 [418-438]	0	2494.42	0	0.395	-1.34	0.376681	4.44	0.395	0.739	0.319	-1.34	-0.44	-1.65	143.4	56.6	62.7	104.79	3	3	82.6	218.6	79.2	32.6	161.6	25.3	1	1	1	1	1	1	82.6	218.6	79.2	32.6	161.6
FALSE	High	[R].KGLHHKILLANFLAQTEALMR.[G]	2xAcetyl:2H(3) [K1; K6]; 1xAcetyl:2H(3) [N-Term]	P06744 2xAcetyl:2H(3) [K418; K423]; 1xAcetyl:2H(3) [N-Term]	FALSE		0.000148104	0	1	1	31	P06744	P06744 [418-438]	0	2539.45	0	1.161	0.22	0.955854	2.74	1.161	1.9	1.14	0.22	0.93	0.19	92.7	107.3	18.85	42.51	3	3	64.6	90.8	92.2	75	172.5	105	1	1	1	1	1	1	64.6	90.8	92.2	75	172.5
FALSE	High	[R].KGLKEGIPALDNFLDKL.[-]	3xAcetyl:2H(3) [K1; K4; K16]	P13639 3xAcetyl:2H(3) [K842; K845; K857]	FALSE		2.60777e-05	0	1	1	6	P13639	P13639 [842-858]	0	2006.15	0	4.874	2.29	0.0451536	4.36	0.085	5.018	4.874	-3.56	2.33	2.29	36.2	163.8	83.96	78.54	3	3	143	35.5	39.4	12.1	178.2	191.8	1	1	1	1	1	1	143	35.5	39.4	12.1	178.2
FALSE	High	[R].KGTEVQVDDIKR.[V]	2xAcetyl:2H(3) [K1; K11]	Q9Y230 2xAcetyl:2H(3) [K417; K427]	FALSE		0.00428789	0	1	1	5	Q9Y230	Q9Y230 [417-428]	0	1477.81	0	1.24	0.31	0.999636	20.87	1.24	6.336	1.065	0.31	2.66	0.09	60.4	139.6	134.88	106.86	3	3	210.6	9.9	27	261.2	62.5	28.8	1	1	1	1	1	1	210.6	9.9	27	261.2	62.5
FALSE	High	[R].KHAEEKFIEFEDSQEQEKKDLQTR.[V]	4xAcetyl:2H(3) [K1; K6; K18; K19]	O60271 4xAcetyl:2H(3) [K97; K102; K114; K115]	FALSE		9.11504e-05	0	1	1	4	O60271	O60271 [97-120]	0	3172.58	0	1.695	0.76	0.930712	0	1.695			0.76			74.2	125.8			1	1	222.7			377.3			1			1			222.7			377.3
FALSE	High	[R].KHAKGLHIVPR.[L]	2xAcetyl:2H(3) [K1; K4]	Q9BWS9 2xAcetyl:2H(3) [K139; K142]	FALSE		0.00106382	0	1	1	32	Q9BWS9	Q9BWS9 [139-149]	0	1345.83	0	0.256	-1.97	0.0347056	4.27	0.143	0.855	0.256	-2.8	-0.23	-1.97	151.7	48.3	51.46	70.46	3	3	238	107.3	102.7	34.1	91.7	26.3	1	1	1	1	1	1	238	107.3	102.7	34.1	91.7
FALSE	High	[R].KELQAAGKSPEDLER.[L]	2xAcetyl:2H(3) [K1; K8]	P06744 2xAcetyl:2H(3) [K447; K454]	FALSE		1.05754e-05	0	1	1	31	P06744	P06744 [447-461]	0	1760.93	0	1.016	0.02	0.982054	44.13	0.714	1.016	2.571	-0.49	0.02	1.36	94.7	105.3	32.7	32.88	3	3	101.7	111.3	56.4	72.6	113.2	144.9	1	1	1	1	1	1	101.7	111.3	56.4	72.6	113.2
FALSE	High	[R].KHDSGAADLER.[V]	1xAcetyl:2H(3) [K1]	Q9NX55 1xAcetyl:2H(3) [K35]	FALSE		0.00250469	0	1	1	6	Q9NX55	Q9NX55 [35-45]	0	1243.61	0	1.981	0.99	0.939152	44.81	1.383	1.981	4.578	0.47	0.99	2.19	37.2	162.8	63.2	55.43	3	3	38.3	102.1	36.7	53	202.2	167.8	1	1	1	1	1	1	38.3	102.1	36.7	53	202.2
FALSE	High	[R].KEIPAKIIFEDDR.[C]	2xAcetyl:2H(3) [K1; K6]	P49773 2xAcetyl:2H(3) [K25; K30]	FALSE		0.000302128	0	1	1	16	P49773	P49773 [25-37]	0	1663.92	0	3.322	1.73	0.179632	59.96	1.979	3.322	5.566	0.98	1.73	2.48	41.7	158.3	50.3	11.37	3	3	76.9	40.1	30.1	152.2	133.2	167.5	1	1	1	1	1	1	76.9	40.1	30.1	152.2	133.2
FALSE	High	[R].KELEEDFIKSELKKAGGANYDAQTE.[-]	4xAcetyl:2H(3) [K1; K9; K13; K14]	Q14019 4xAcetyl:2H(3) [K118; K126; K130; K131]	FALSE		0.00377009	0	1	1	10	Q14019	Q14019 [118-142]	0	2993.5	0	3.532	1.82	0.476599	41.45	4.52	3.532	1.731	2.18	1.82	0.79	57.3	142.7	48.42	25.11	3	3	26.4	53.7	77.2	119.6	189.6	133.6	1	1	1	1	1	1	26.4	53.7	77.2	119.6	189.6
FALSE	High	[K].KAPEDCKLSPTPEQTR.[R]	1xCarbamidomethyl [C6]; 2xAcetyl:2H(3) [K1; K7]; 1xAcetyl:2H(3) [N-Term]	P28800 1xCarbamidomethyl [C71]; 2xAcetyl:2H(3) [K66; K72]; 1xAcetyl:2H(3) [N-Term]	TRUE	FBS	0.00266115	0	1	1	3	P28800	P28800 [66-81]	0	1992.01	0	1.391	0.48	0.986001	0	1.391			0.48			83.7	116.3			1	1	251			349			1			1			251			349
FALSE	High	[R].KAQPAQPADEPAEKADEPM.[E]	2xAcetyl:2H(3) [K1; K14]	P25786 2xAcetyl:2H(3) [K243; K256]	FALSE		0.00432047	0	1	1	2	P25786	P25786 [243-261]	0	2113	0	1.924	0.94	0.972143	5.99	1.924	2.359	1.846	0.94	1.24	0.88	59.5	140.5	44.05	41.67	3	3	98.1	57.8	41.7	188.8	136.4	77.1	1	1	1	1	1	1	98.1	57.8	41.7	188.8	136.4
FALSE	High	[R].KAQPAQPADEPAEKADEPMEH.[-]	2xAcetyl:2H(3) [K1; K14]	P25786 2xAcetyl:2H(3) [K243; K256]	FALSE		6.72982e-05	0	1	1	27	P25786	P25786 [243-263]	0	2379.1	0	1.553	0.64	0.903163	3.33	1.588	0.812	1.553	0.67	-0.3	0.64	77.3	122.7	60.07	24.15	3	3	73	156.4	50.1	115.9	127	77.8	1	1	1	1	1	1	73	156.4	50.1	115.9	127
FALSE	High	[R].KAQPAQPADEPAEKADEPMEH.[-]	1xOxidation [M19]; 2xAcetyl:2H(3) [K1; K14]	P25786 1xOxidation [M261]; 2xAcetyl:2H(3) [K243; K256]	FALSE		0.00382762	0	1	1	21	P25786	P25786 [243-263]	0	2395.1	0	0.772	-0.37	0.967382	9.44	0.772	0.69	1.445	-0.37	-0.54	0.53	113.2	86.8	2.49	45.5	3	3	99.4	100.2	104.1	76.8	69.1	150.5	1	1	1	1	1	1	99.4	100.2	104.1	76.8	69.1
FALSE	High	[K].KATEGQGSEQKIPGATNR.[R]	2xAcetyl:2H(3) [K1; K11]; 1xAcetyl:2H(3) [N-Term]	F1MSZ6 2xAcetyl:2H(3) [K62; K72]; 1xAcetyl:2H(3) [N-Term]	TRUE	FBS	0.000406114	0	1	1	10	F1MSZ6	F1MSZ6 [62-79]	0	2007.05	0	1.475	0.56	0.775921	77.71	0.702	17.744	1.475	-0.51	4.15	0.56	10.7	189.3	164.96	96.38	3	3	286.4	5.5	3.9	201.1	97.4	5.8	1	1	1	1	1	1	286.4	5.5	3.9	201.1	97.4
FALSE	High	[M].KAVTELNEPLSNEDR.[N]	1xAcetyl:2H(3) [K1]	Q04917 1xAcetyl:2H(3) [K28]	FALSE		0.000490895	0	1	1	5	Q04917	Q04917 [28-42]	0	1759.89	0	1.435	0.52	0.998323	24.63	100	1.196	1.435	6.64	0.26	0.52	96.9	103.1	41.14	42.65	2	3		148.9	81.8	73.7	178.2	117.4		1	1	1	1	1		148.9	81.8	73.7	178.2
FALSE	High	[M].KAVTEQGAELSNEER.[N]	1xAcetyl:2H(3) [K1]	P27348 1xAcetyl:2H(3) [K27]	FALSE		9.39581e-05	0	1	1	9	P27348	P27348 [27-41]	0	1705.84	0	1.252	0.32	0.982054	1.88	1.236	1.252	1.335	0.31	0.32	0.42	89.4	110.6	24.6	21.64	3	3	92.9	107.3	64.6	114.8	134.3	86.2	1	1	1	1	1	1	92.9	107.3	64.6	114.8	134.3
FALSE	High	[R].KAYGQALAKLGHASDR.[I]	2xAcetyl:2H(3) [K1; K9]; 1xAcetyl:2H(3) [N-Term]	P29401 2xAcetyl:2H(3) [K319; K327]; 1xAcetyl:2H(3) [N-Term]	FALSE		3.97546e-06	0	1	1	3	P29401	P29401 [319-334]	0	1821	0	0.578	-0.79	0.851789	39.6	0.01	1.04	0.578	-6.64	0.06	-0.79	104.9	95.1	82.8	59.71	3	2	8.8	185.1	135.3		192.5	78.2	1	1	1		1	1	8.8	185.1	135.3		192.5
FALSE	High	[R].KDDEVQVVR.[G]	1xAcetyl:2H(3) [K1]	P61254 1xAcetyl:2H(3) [K51]	FALSE		0.00441971	0	1	2	16	P61254	P61254 [51-59]	0	1132.6	0	0.762	-0.39	0.948542	8.1	0.504	0.762	0.834	-0.99	-0.39	-0.26	113.5	86.5	60.8	31.99	3	3	207.7	92.6	67.9	104.7	70.6	56.6	1	1	1	1	1	1	207.7	92.6	67.9	104.7	70.6
FALSE	High	[R].KDDGELPKSR.[Y]	2xAcetyl:2H(3) [K1; K8]	Q9Y6N7 2xAcetyl:2H(3) [K297; K304]	FALSE		0.00452122	0	1	1	3	Q9Y6N7	Q9Y6N7 [297-306]	0	1234.65	0	1.617	0.69	0.92424	57.04	0.995	1.617	2.8	-0.01	0.69	1.49	76.4	123.6	24.45	72.25	3	3	51.9	66.3	84.9	51.7	107.3	237.8	1	1	1	1	1	1	51.9	66.3	84.9	51.7	107.3
FALSE	High	[R].KDDPTLLSSGR.[V]	1xAcetyl:2H(3) [K1]	P22061 1xAcetyl:2H(3) [K125]	FALSE		0.00223566	0	1	1	9	P22061	P22061 [125-135]	0	1233.65	0	1.726	0.79	0.596495	27.97	3.098	1.4	1.726	1.63	0.49	0.79	73.4	126.6	19.22	22.34	3	3	53.7	79.4	69.5	166.3	111.2	120	1	1	1	1	1	1	53.7	79.4	69.5	166.3	111.2
FALSE	High	[R].KDENSINGTPDITVEIR.[E]	1xAcetyl:2H(3) [K1]	P35573 1xAcetyl:2H(3) [K791]	FALSE		0.00220204	0	1	1	1	P35573	P35573 [791-807]	0	1945.99	0	1.081	0.11	0.999983	50.74	0.219	1.081	1.451	-2.19	0.11	0.54	96.1	103.9	16.51	62.65	3	3	128.7	99.1	96.7	28.2	107.1	140.2	1	1	1	1	1	1	128.7	99.1	96.7	28.2	107.1
FALSE	High	[R].KDGNASGTTLLEALDCILPPTRPTDKPLR.[L]	1xCarbamidomethyl [C16]; 2xAcetyl:2H(3) [K1; K26]	P68104 1xCarbamidomethyl [C234]; 2xAcetyl:2H(3) [K219; K244]	FALSE		2.81325e-05	0	1	2	28	P68104	P68104 [219-247]	0	3239.72	0	2.218	1.15	0.328973	79.69	1.026	2.218	5.088	0.04	1.15	2.35	49.4	150.6	87.8	19.78	3	3	144.2	44.9	26.9	147.9	99.5	136.6	1	1	1	1	1	1	144.2	44.9	26.9	147.9	99.5
FALSE	High	[R].KDGVLVSTQDSR.[I]	1xAcetyl:2H(3) [K1]	Q9Y6N7 1xAcetyl:2H(3) [K490]	FALSE		0.0013456	0	1	1	10	Q9Y6N7	Q9Y6N7 [490-501]	0	1349.71	0	2.541	1.35	0.562237	117.72	0.523	2.541	4.85	-0.93	1.35	2.28	60.1	139.9	16.59	80.86	3	3	68.3	50	54.5	35.8	126.9	264.5	1	1	1	1	1	1	68.3	50	54.5	35.8	126.9
FALSE	High	[R].KDGYVLSLNR.[V]	1xAcetyl:2H(3) [K1]; 1xAcetyl:2H(3) [N-Term]	Q58D62 1xAcetyl:2H(3) [K57]; 1xAcetyl:2H(3) [N-Term]	TRUE	FBS	0.00316752	0	1	1	11	Q58D62	Q58D62 [57-66]	0	1254.7	0	0.651	-0.62	0.916225	30.04	2.432	0.651	0.34	1.28	-0.62	-1.55	121.1	78.9	7.73	92.32	3	3	87.9	97.5	102.5	213.7	63.5	34.9	1	1	1	1	1	1	87.9	97.5	102.5	213.7	63.5
FALSE	High	[R].KDPVPDLAAWVTSFAAR.[R]	1xAcetyl:2H(3) [K1]	P54802 1xAcetyl:2H(3) [K465]	FALSE		0.00192132	0	1	1	6	P54802	P54802 [465-481]	0	1889	0	0.444	-1.17	0.743814	18.32	0.166	0.444	1.581	-2.59	-1.17	0.66	124.2	75.8	34	73.71	3	3	122.2	167.8	83.3	20.3	74.6	131.7	1	1	1	1	1	1	122.2	167.8	83.3	20.3	74.6
FALSE	High	[R].KEAAENSLVAYKAASDIAMTELPPTHPIR.[L]	2xAcetyl:2H(3) [K1; K12]	P62258 2xAcetyl:2H(3) [K142; K153]	FALSE		8.66831e-09	0	1	1	149	P62258	P62258 [142-170]	0	3213.67	0	0.814	-0.3	0.987505	4.23	1.188	0.779	0.814	0.25	-0.36	-0.3	92.6	107.4	62.22	47.97	3	3	67.6	183.5	69.3	80.3	143	56.4	1	1	1	1	1	1	67.6	183.5	69.3	80.3	143
FALSE	High	[R].KEAAENSLVAYKAASDIAMTELPPTHPIR.[L]	1xOxidation [M19]; 2xAcetyl:2H(3) [K1; K12]	P62258 1xOxidation [M160]; 2xAcetyl:2H(3) [K142; K153]	FALSE		2.62762e-05	0	1	1	56	P62258	P62258 [142-170]	0	3229.67	0	0.031	-5.01	5.54925e-07	0.1	0.01	0.031	1.133	-6.64	-5.01	0.18	166.3	33.7	29.6	128.38	3	2	142.4	204.6	115.7		6.3	131	1	1	1		1	1	142.4	204.6	115.7		6.3
FALSE	High	[R].KEAAENSLVAYKAASDIAMTELPPTHPIR.[L]	2xAcetyl:2H(3) [K1; K12]; 1xAcetyl:2H(3) [N-Term]	P62258 2xAcetyl:2H(3) [K142; K153]; 1xAcetyl:2H(3) [N-Term]	FALSE		0.000847411	0	1	1	74	P62258	P62258 [142-170]	0	3258.7	0	0.649	-0.62	0.865747	1.38	1.329	0.649	0.635	0.41	-0.62	-0.66	93.4	106.6	51.33	35.57	3	3	72.7	177.3	84.7	96.6	115.1	53.7	1	1	1	1	1	1	72.7	177.3	84.7	96.6	115.1
FALSE	High	[R].KEASDPQPEEADGGLKSWR.[E]	2xAcetyl:2H(3) [K1; K16]	P52907 2xAcetyl:2H(3) [K103; K118]	FALSE		5.36789e-07	0	1	1	33	P52907	P52907 [103-121]	0	2190.06	0	1.215	0.28	0.972143	9.4	1.078	1.292	1.215	0.11	0.37	0.28	90.3	109.7	36.4	29.65	3	3	120.5	55.1	100.9	129.9	71.2	122.5	1	1	1	1	1	1	120.5	55.1	100.9	129.9	71.2
FALSE	High	[R].KEASDPQPEEADGGLKSWR.[E]	2xAcetyl:2H(3) [K1; K16]; 1xAcetyl:2H(3) [N-Term]	P52907 2xAcetyl:2H(3) [K103; K118]; 1xAcetyl:2H(3) [N-Term]	FALSE		0.00119192	0	1	1	4	P52907	P52907 [103-121]	0	2235.09	0	1.185	0.24	0.999636	62.69	0.65	1.686	1.185	-0.62	0.75	0.24	91.5	108.5	31.41	20.74	3	3	131.2	75.4	82.8	85.2	127.1	98.1	1	1	1	1	1	1	131.2	75.4	82.8	85.2	127.1
FALSE	High	[R].KEAYVHKSVMEELKR.[I]	3xAcetyl:2H(3) [K1; K7; K14]	P61326 3xAcetyl:2H(3) [K48; K54; K61]; Q96A72 3xAcetyl:2H(3) [K50; K56; K63]	FALSE		0.000286506	0	2	2	4	P61326; Q96A72	P61326 [48-62]; Q96A72 [50-64]	0	1982.07	0	0.19	-2.4	0.0429799	50.49	3.6	0.01		1.85	-6.64		30.4	169.6	58.43		2	1	119.6	49.7		430.7			1	1		1			119.6	49.7		430.7
FALSE	High	[R].KEFGDTGEGWETVEMHPAYTEEELR.[R]	1xAcetyl:2H(3) [K1]	Q02818 1xAcetyl:2H(3) [K324]	FALSE		0.000248056	0	1	1	1	Q02818	Q02818 [324-348]	0	2985.33	0	1.027	0.04	0.999636	0	1.027			0.04			98.7	101.3			1	1	296			304			1			1			296			304
FALSE	High	[R].KEFGDTGEGWETVEMHPAYTEEELRR.[F]	1xAcetyl:2H(3) [K1]	Q02818 1xAcetyl:2H(3) [K324]	FALSE		0.000376453	0	1	1	4	Q02818	Q02818 [324-349]	1	3141.43	0	0.919	-0.12	0.991666	123.94	0.01	0.919	2.366	-6.64	-0.12	1.24	65.1	134.9	94.64	18.67	3	2	5	164.1	83.2		150.9	196.8	1	1	1		1	1	5	164.1	83.2		150.9
FALSE	High	[R].KEGGLGPLNIPLLADVTR.[R]	1xAcetyl:2H(3) [K1]	P32119 1xAcetyl:2H(3) [K92]	FALSE		3.32881e-07	0	1	1	67	P32119	P32119 [92-109]	0	1908.1	0	1.291	0.37	0.906812	31.95	1.57	0.941	1.291	0.65	-0.09	0.37	94.8	105.2	12.75	22.96	3	3	89.6	99.6	77	140.6	93.7	99.5	1	1	1	1	1	1	89.6	99.6	77	140.6	93.7
FALSE	High	[R].KEGGLGPLNIPLLADVTR.[R]	1xAcetyl [N-Term]; 1xAcetyl:2H(3) [K1]	P32119 1xAcetyl [N-Term]; 1xAcetyl:2H(3) [K92]	FALSE		0.00365763	0	1	1	20	P32119	P32119 [92-109]	0	1950.11	0	1.097	0.13	0.99444	21.98	1.097	0.934	1.75	0.13	-0.1	0.81	103.4	96.6	87.95	116.04	3	3	35.9	42.7	160.8	39.4	39.9	281.2	1	1	1	1	1	1	35.9	42.7	160.8	39.4	39.9
FALSE	High	[R].KEGGLGPLNIPLLADVTR.[R]	1xAcetyl:2H(3) [K1]; 1xAcetyl:2H(3) [N-Term]	P32119 1xAcetyl:2H(3) [K92]; 1xAcetyl:2H(3) [N-Term]	FALSE		0.00106382	0	1	1	7	P32119	P32119 [92-109]	0	1953.13	0	1.544	0.63	0.960875	46.86	1.056	2.122	1.544	0.08	1.09	0.63	74.9	125.1	47.99	13.67	3	3	127.9	53.1	67.4	135.1	112.6	104	1	1	1	1	1	1	127.9	53.1	67.4	135.1	112.6
FALSE	High	[R].KEKGSREEKQKPQAER.[K]	4xAcetyl:2H(3) [K1; K3; K9; K11]	P26641 4xAcetyl:2H(3) [K233; K235; K241; K243]	FALSE		0.000323471	0	1	1	21	P26641	P26641 [233-248]	1	2108.15	0	1.955	0.97	0.493087	89.98	0.769	1.955	4.292	-0.38	0.97	2.1	49.2	150.8	94.84	24.34	3	3	172.5	43.3	31.6	132.5	84.6	135.6	1	1	1	1	1	1	172.5	43.3	31.6	132.5	84.6
FALSE	High	[R].KEKLDSVIEFSIPDSLLIR.[R]	2xAcetyl:2H(3) [K1; K3]	P54819 2xAcetyl:2H(3) [K119; K121]	FALSE		0.00122862	0	1	1	6	P54819	P54819 [119-137]	0	2292.3	0	2.797	1.48	0.551586	130.41	100	0.337	2.797	6.64	-1.57	1.48	105.7	94.3	106.17	51.42	2	3		300.5	42.8	35.9	101.2	119.7		1	1	1	1	1		300.5	42.8	35.9	101.2
FALSE	High	[R].KELGLDEGVDSLKAAIQSR.[Q]	2xAcetyl:2H(3) [K1; K13]	Q8WXX5 2xAcetyl:2H(3) [K205; K217]	FALSE		2.19033e-05	0	1	1	8	Q8WXX5	Q8WXX5 [205-223]	0	2119.15	0	1.634	0.71	0.914729	41	1.634	1.182	3.935	0.71	0.24	1.98	61.5	138.5	38.37	34.35	3	3	93.6	67.9	41.6	152.9	80.2	163.8	1	1	1	1	1	1	93.6	67.9	41.6	152.9	80.2
FALSE	High	[R].LDIDSPPITAR.[N]			FALSE		0.00268139	0	1	1	12	P14618	P14618 [33-43]	0	1197.65	0	2.089	1.06	0.353616	76.2	1.015	2.089	6.111	0.02	1.06	2.61	64.4	135.6	71.86	12.47	3	3	121	58.4	24.7	122.9	122	150.9	1	1	1	1	1	1	121	58.4	24.7	122.9	122
FALSE	High	[R].IDINMSGFNETDDLKR.[A]	1xAcetyl:2H(3) [K15]	P13797 1xAcetyl:2H(3) [K335]	FALSE		4.26944e-05	0	1	1	9	P13797	P13797 [321-336]	0	1912.91	0	4.052	2.02	0.0936707	4.1	1.683	4.052	4.164	0.75	2.02	2.06	38.7	161.3	73.67	20.21	3	3	102.1	28.1	35.7	171.9	113.7	148.5	1	1	1	1	1	1	102.1	28.1	35.7	171.9	113.7
FALSE	High	[R].IDLSNNQISELAPDAFQGLR.[S]			FALSE		0.000461998	0	1	1	1	O94813	O94813 [329-348]	0	2201.12	0	1.212	0.28	0.998323	94.58	0.213	1.212	1.985	-2.23	0.28	0.99	112	88	63.33	74.14	3	3	186.1	54.9	84.7	39.6	66.5	168.2	1	1	1	1	1	1	186.1	54.9	84.7	39.6	66.5
FALSE	High	[R].IVAPGKGILAADESTGSIAKR.[L]	2xAcetyl:2H(3) [K6; K20]; 1xAcetyl:2H(3) [N-Term]	P04075 2xAcetyl:2H(3) [K28; K42]; 1xAcetyl:2H(3) [N-Term]	FALSE		0.000158567	0	1	1	17	P04075	P04075 [23-43]	0	2189.25	0	1.36	0.44	0.861719	5.02	0.546	1.36	1.406	-0.87	0.44	0.49	95.6	104.4	13.92	45.26	3	3	100.4	80.6	105.9	54.8	109.6	148.8	1	1	1	1	1	1	100.4	80.6	105.9	54.8	109.6
FALSE	High	[H].LVDEPQNLIKQNCDQFEKLGEYGFQNALIVR.[Y]	1xCarbamidomethyl [C13]; 2xAcetyl:2H(3) [K10; K18]	P02769 1xCarbamidomethyl [C415]; 2xAcetyl:2H(3) [K412; K420]	TRUE	FBS	0.00068532	0	1	1	5	P02769	P02769 [403-433]	0	3768.92	0	0.868	-0.2	0.976058	11.78		0.781	0.964		-0.36	-0.05	107.1	92.9	9.11	23.79	2	2		149.4	170		116.7	163.9		1	1		1	1		149.4	170		116.7
FALSE	High	[R].LVDSKGFDEYMKELGVGIALR.[K]	2xAcetyl:2H(3) [K5; K12]	Q01469 2xAcetyl:2H(3) [K17; K24]	FALSE		0.00266115	0	1	1	2	Q01469	Q01469 [13-33]	0	2430.29	0	100	6.64	1.64805e-16	0		100	100		6.64	6.64		200		78.84		2					467.2	132.8					1	1					467.2
FALSE	High	[R].LVEPGSPAEKAGLLAGDR.[L]	1xAcetyl:2H(3) [K10]	O14745 1xAcetyl:2H(3) [K50]	FALSE		0.00291435	0	1	1	1	O14745	O14745 [41-58]	0	1824.99	0	19.491	4.28	0.00597461	365.89		100	3.799		6.64	1.93	56.3	143.7		53.36	1	2			92.1		158.1	349.8			1		1	1			92.1		158.1
FALSE	High	[R].LVGGPMDASVEEEGVR.[R]			FALSE		0.0002931	0	1	1	64	P01034	P01034 [35-50]	0	1644.79	0	1.218	0.28	0.927269	8.26	1.218	0.67	1.286	0.28	-0.58	0.36	100.7	99.3	26.73	16.77	3	3	97.3	127.9	74.6	118.5	85.7	96	1	1	1	1	1	1	97.3	127.9	74.6	118.5	85.7
FALSE	High	[R].LVGGPMDASVEEEGVR.[R]	1xOxidation [M6]	P01034 1xOxidation [M40]	FALSE		4.01809e-05	0	1	1	147	P01034	P01034 [35-50]	0	1660.78	0	0.657	-0.61	0.908591	9.26	0.657	0.562	0.931	-0.61	-0.83	-0.1	112.4	87.6	18.68	33.5	3	3	137.8	94.4	116.1	90.5	53.1	108.1	1	1	1	1	1	1	137.8	94.4	116.1	90.5	53.1
FALSE	High	[R].LVGGPMDASVEEEGVR.[R]	1xAcetyl:2H(3) [N-Term]	P01034 1xAcetyl:2H(3) [N-Term]	FALSE		0.000140446	0	1	1	13	P01034	P01034 [35-50]	0	1689.82	0	0.927	-0.11	0.99381	26.62	1.388	0.733	0.927	0.47	-0.45	-0.11	87.6	112.4	43.3	20.73	3	3	74.3	154.5	80.4	103.2	113.2	74.5	1	1	1	1	1	1	74.3	154.5	80.4	103.2	113.2
FALSE	High	[R].LVGIFENQER.[K]	1xAcetyl:2H(3) [N-Term]	O95989 1xAcetyl:2H(3) [N-Term]	FALSE		0.00448712	0	1	1	7	O95989	O95989 [80-89]	0	1249.66	0	1.734	0.79	0.954559	4.22	1.685	1.734	1.813	0.75	0.79	0.86	74.5	125.5	24.42	28.07	3	3	64.6	60.3	93	108.9	104.6	168.5	1	1	1	1	1	1	64.6	60.3	93	108.9	104.6
FALSE	High	[R].LVKDVFISAAER.[D]	1xAcetyl:2H(3) [K3]	P20618 1xAcetyl:2H(3) [K204]	FALSE		0.00163867	0	1	1	12	P20618	P20618 [202-213]	0	1392.79	0	0.805	-0.31	0.96318	56.04	0.805	100	0.336	-0.31	6.64	-1.57	126.1	73.9	71.52	43.14	2	3	78.2		238.2	63	140.6	80	1		1	1	1	1	78.2		238.2	63	140.6
FALSE	High	[R].LVKDVFISAAER.[D]	1xAcetyl:2H(3) [K3]; 1xAcetyl:2H(3) [N-Term]	P20618 1xAcetyl:2H(3) [K204]; 1xAcetyl:2H(3) [N-Term]	FALSE		0.00107191	0	1	1	18	P20618	P20618 [202-213]	0	1437.82	0	1.018	0.03	0.999636	44.12	1.018	1.321	0.615	0.03	0.4	-0.7	100.2	99.8	18.42	24	3	3	90.9	92.8	124.6	92.5	122.6	76.6	1	1	1	1	1	1	90.9	92.8	124.6	92.5	122.6
FALSE	High	[R].LVKEKVMYEKEAKQQEEKIEKMR.[A]	6xAcetyl:2H(3) [K3; K5; K10; K13; K18; K21]	O75347 6xAcetyl:2H(3) [K21; K23; K28; K31; K36; K39]	FALSE		6.07917e-06	0	1	1	21	O75347	O75347 [19-41]	0	3164.72	0	4.546	2.18	0.104675	32.54	19.35	4.546	3.548	4.27	2.18	1.83	44	156	68.07	26.35	3	3	7.2	48.2	40.9	139.7	218.9	145.1	1	1	1	1	1	1	7.2	48.2	40.9	139.7	218.9
FALSE	High	[R].LVKEKVMYEKEAKQQEEKIEKMR.[A]	1xOxidation [M]; 6xAcetyl:2H(3) [K3; K5; K10; K13; K18; K21]	O75347 1xOxidation [M]; 6xAcetyl:2H(3) [K21; K23; K28; K31; K36; K39]	FALSE		2.79199e-05	0	1	1	13	O75347	O75347 [19-41]	0	3180.72	0	3.029	1.6	0.407548	52.51	8.011	3.029	1.956	3	1.6	0.97	49.6	150.4	78	33.35	3	3	11.4	53.9	94.6	91.6	163.3	185.1	1	1	1	1	1	1	11.4	53.9	94.6	91.6	163.3
FALSE	High	[R].LVKEKVMYEKEAKQQEEKIEKMR.[A]	6xAcetyl:2H(3) [K3; K5; K10; K13; K18; K21]; 1xAcetyl:2H(3) [N-Term]	O75347 6xAcetyl:2H(3) [K21; K23; K28; K31; K36; K39]; 1xAcetyl:2H(3) [N-Term]	FALSE		0.00371344	0	1	1	4	O75347	O75347 [19-41]	0	3209.75	0	100	6.64	1.64805e-16	0	100	100	3.23	6.64	6.64	1.69	51.6	148.4		19.45	1	3			64.7	140.6	185.9	208.8			1	1	1	1			64.7	140.6	185.9
FALSE	High	[R].IVAPGKGILAADESTGSIAKR.[L]	2xAcetyl:2H(3) [K6; K20]	P04075 2xAcetyl:2H(3) [K28; K42]	FALSE		2.88208e-07	0	1	1	61	P04075	P04075 [23-43]	0	2144.22	0	0.693	-0.53	0.944676	2.89	0.721	0.474	0.693	-0.47	-1.08	-0.53	116.2	83.8	32	10.44	3	3	108.7	170.4	95.5	78.4	80.8	66.2	1	1	1	1	1	1	108.7	170.4	95.5	78.4	80.8
FALSE	High	[R].LVIQDKNKYNTPKYR.[M]	3xAcetyl:2H(3) [K6; K8; K13]; 1xAcetyl:2H(3) [N-Term]	P46777 3xAcetyl:2H(3) [K41; K43; K48]; 1xAcetyl:2H(3) [N-Term]	FALSE		0.000584436	0	1	1	23	P46777	P46777 [36-50]	0	2060.16	0	0.573	-0.8	0.797852	1.46	0.573	2.232	0.556	-0.8	1.16	-0.85	107.5	92.5	37.78	52.2	3	3	145.5	68.1	97	83.4	152	53.9	1	1	1	1	1	1	145.5	68.1	97	83.4	152
FALSE	High	[R].LVSGWVKPIIIGR.[H]	1xAcetyl:2H(3) [K7]; 1xAcetyl:2H(3) [N-Term]	O75874 1xAcetyl:2H(3) [K126]; 1xAcetyl:2H(3) [N-Term]	FALSE		0.00158975	0	1	1	7	O75874	O75874 [120-132]	0	1527.95	0	0.831	-0.27	0.972678	7.08	0.773	0.831	1.419	-0.37	-0.27	0.5	109.3	90.7	16.83	16.35	3	3	115.2	107.3	82.4	89.1	89.1	116.9	1	1	1	1	1	1	115.2	107.3	82.4	89.1	89.1
FALSE	High	[R].LVSKDGKSKGIAYIEFKTEADAEKTFEEKQGTEIDGR.[S]	6xAcetyl:2H(3) [K4; K7; K9; K17; K24; K29]	P19338 6xAcetyl:2H(3) [K424; K427; K429; K437; K444; K449]	FALSE		0.00300398	0	1	1	19	P19338	P19338 [421-457]	0	4388.27	0	1.632	0.71	0.882865	23.11	0.01	1.632	1.886	-6.64	0.71	0.92	77.9	122.1	49.69	25.78	3	2	169.6	69	86.3		112.5	162.7	1	1	1		1	1	169.6	69	86.3		112.5
FALSE	High	[R].LVSLIGSKTQIPTQR.[Y]	1xAcetyl:2H(3) [K8]; 1xAcetyl:2H(3) [N-Term]	P25786 1xAcetyl:2H(3) [K115]; 1xAcetyl:2H(3) [N-Term]	FALSE		0.000756314	0	1	1	9	P25786	P25786 [108-122]	0	1731.03	0	1.243	0.31	0.971933	24.65	1.012	1.449	1.243	0.02	0.54	0.31	93.4	106.6	15.18	7.25	3	3	101.1	74.9	95	102.3	108.6	118.1	1	1	1	1	1	1	101.1	74.9	95	102.3	108.6
FALSE	High	[R].IVSQLLTLMDGLKQR.[A]	1xAcetyl:2H(3) [K13]	P55072 1xAcetyl:2H(3) [K336]	FALSE		0.000341108	0	1	1	12	P55072	P55072 [324-338]	0	1760.02	0	100	6.64	1.64805e-16	0	1.083	100	100	0.12	6.64	6.64	123.4	76.6		44.94	1	3	189.7			205.5	117.8	87	1			1	1	1	189.7			205.5	117.8
FALSE	High	[R].LVSSDPEINTKKINPENSKLSDLDSETR.[S]	3xAcetyl:2H(3) [K11; K12; K19]	Q9Y266 3xAcetyl:2H(3) [K267; K268; K275]	FALSE		0.000167213	0	1	1	8	Q9Y266	Q9Y266 [257-284]	0	3264.68	0	2.207	1.14	0.730036	40.77	1.6	2.207	25.958	0.68	1.14	4.7	52.9	147.1	82.15	30.86	3	3	87.6	50.4	7.8	140.2	111.3	202.7	1	1	1	1	1	1	87.6	50.4	7.8	140.2	111.3
FALSE	High	[K].LVTDLTKVHKECCHGDLLECADDR.[A]	3xCarbamidomethyl [C12; C13; C20]; 2xAcetyl:2H(3) [K7; K10]	P02769 3xCarbamidomethyl [C268; C269; C276]; 2xAcetyl:2H(3) [K263; K266]	TRUE	FBS	0.000822098	0	1	1	4	P02769	P02769 [257-280]	0	2974.4	0	0.868	-0.2	0.984472	42.94	1.202	0.283	0.868	0.27	-1.82	-0.2	123.1	76.9	79.06	34.34	3	3	39.1	241.4	109.3	46.9	68.3	95	1	1	1	1	1	1	39.1	241.4	109.3	46.9	68.3
FALSE	High	[K].LVTDLTKVHKECCHGDLLECADDR.[A]	3xCarbamidomethyl [C12; C13; C20]; 2xAcetyl:2H(3) [K7; K10]; 1xAcetyl:2H(3) [N-Term]	P02769 3xCarbamidomethyl [C268; C269; C276]; 2xAcetyl:2H(3) [K263; K266]; 1xAcetyl:2H(3) [N-Term]	TRUE	FBS	7.71424e-05	0	1	1	1	P02769	P02769 [257-280]	0	3019.43	0	0.261	-1.94	0.277093	0.53		0.248	0.275		-2.01	-1.86	158.6	41.4	51.37	57.63	2	2		150.9	323		37.4	88.7		1	1		1	1		150.9	323		37.4
FALSE	High	[D].LVVGLCTGQIKTGAPCR.[S]	2xCarbamidomethyl [C6; C16]; 1xAcetyl:2H(3) [K11]	P06733 2xCarbamidomethyl [C389; C399]; 1xAcetyl:2H(3) [K394]	FALSE		4.57105e-05	0	1	3	4	P06733	P06733 [384-400]	0	1875	0	11.112	3.47	0.00115326	658.88	100	1.235		6.64	0.3		148.4	51.6		120.66	1	2		257.2		25.2	317.6			1		1	1			257.2		25.2	317.6
FALSE	High	[R].LVVLDEELEGISPDELKDELPER.[Q]	1xAcetyl:2H(3) [K17]	P60983 1xAcetyl:2H(3) [K58]	FALSE		0.000773715	0	1	1	5	P60983	P60983 [42-64]	0	2682.38	0	4.841	2.28	0.384648	41.53	4.841	14.883	3.485	2.28	3.9	1.8	26.8	173.2	75.77	23.63	3	3	26.3	11.4	59.2	127.1	169.7	206.3	1	1	1	1	1	1	26.3	11.4	59.2	127.1	169.7
FALSE	High	[D].LVYQAKLAEQAER.[Y]	1xAcetyl:2H(3) [K6]	P62258 1xAcetyl:2H(3) [K12]	FALSE		0.000722678	0	1	1	10	P62258	P62258 [7-19]	0	1563.86	0	1.103	0.14	0.998323	0		1.103			0.14		95.1	104.9			1	1		285.3			314.7			1			1			285.3			314.7
FALSE	High	[A].LWPWPQNFQTSDQR.[Y]	1xAcetyl:2H(3) [N-Term]	P06865 1xAcetyl:2H(3) [N-Term]	FALSE		0.00291435	0	1	1	8	P06865	P06865 [23-36]	0	1847.89	0	0.452	-1.15	0.57757	0.84	0.439	0.452	0.655	-1.19	-1.15	-0.61	124.3	75.7	37.54	26.36	3	3	191.4	108.6	100.9	84	49	66.1	1	1	1	1	1	1	191.4	108.6	100.9	84	49
FALSE	High	[R].LYDAYELKHALKGAGTNEKVLTEIIASR.[T]	3xAcetyl:2H(3) [K8; K12; K19]	P08758 3xAcetyl:2H(3) [K97; K101; K108]	FALSE		0.00256226	0	1	1	4	P08758	P08758 [90-117]	0	3238.77	0	0.77	-0.38	0.963484	50.93	3.546	0.324	0.77	1.83	-1.63	-0.38	97.3	102.7	119.45	35.66	3	3	18.8	304.5	63	66.6	98.7	48.5	1	1	1	1	1	1	18.8	304.5	63	66.6	98.7
FALSE	High	[R].LYDAYELKHALKGAGTNEKVLTEIIASR.[T]	3xAcetyl:2H(3) [K8; K12; K19]; 1xAcetyl:2H(3) [N-Term]	P08758 3xAcetyl:2H(3) [K97; K101; K108]; 1xAcetyl:2H(3) [N-Term]	FALSE		0.00242994	0	1	1	2	P08758	P08758 [90-117]	0	3283.8	0	0.273	-1.87	0.32666	5.53		0.442	0.169		-1.18	-2.56	157.1	42.9	87.2	117.9	2	2		349	82.8		154.3	14		1	1		1	1		349	82.8		154.3
FALSE	High	[E].LVQKAKLAEQAER.[Y]	2xAcetyl:2H(3) [K4; K6]	P63104 2xAcetyl:2H(3) [K9; K11]; P31946 2xAcetyl:2H(3) [K11; K13]	FALSE		0.00403593	0	2	2	3	P63104; P31946	P63104 [6-18]; P31946 [8-20]	0	1573.92	0	0.819	-0.29	0.956525	52.9		1.363	0.492		0.45	-1.02	109.9	90.1	43.63	96.11	2	2		190.4	100.6		259.5	49.5		1	1		1	1		190.4	100.6		259.5
FALSE	High	[KR].LTVEDPVTVEYITR.[FY]			FALSE		0.000184539	0	1	2	17	O14818	O14818 [96-109]	0	1634.86	0	1.074	0.1	0.975159	7.37	1.074	1.128	0.465	0.1	0.17	-1.11	112.5	87.5	18.4	40.82	3	3	84.5	116.7	120.4	90.8	131.6	55.9	1	1	1	1	1	1	84.5	116.7	120.4	90.8	131.6
FALSE	High	[R].ITSGPFEPDLYKSEMEVQDAELKALLQSSASR.[K]	2xAcetyl:2H(3) [K12; K23]	Q9UQ80 2xAcetyl:2H(3) [K344; K355]	FALSE		0.00146259	0	1	1	23	Q9UQ80	Q9UQ80 [333-364]	0	3629.82	0	1.295	0.37	0.947181	55.29	1.295	0.812	2.362	0.37	-0.3	1.24	87.1	112.9	59.62	10.77	3	3	82.8	149.2	41.5	107.3	121.2	97.9	1	1	1	1	1	1	82.8	149.2	41.5	107.3	121.2
FALSE	High	[R].ISSIQATTAAGSGHPTSCCSAAEIMAVLFFHTMR.[Y]	2xCarbamidomethyl [C18; C19]	P29401 2xCarbamidomethyl [C41; C42]	FALSE		0.000458508	0	1	1	5	P29401	P29401 [24-57]	0	3610.69	0	0.062	-4.02	3.51902e-05	1.71		0.382	0.01		-1.39	-6.64	107.7	92.3	94.55		2	1		379.5	75.4		145.1			1	1		1			379.5	75.4		145.1
FALSE	High	[S].IPLDPVAGYKEPACDDPDTEQAALAAVDYINKHLPR.[G]	1xCarbamidomethyl [C14]; 2xAcetyl:2H(3) [K10; K32]; 1xAcetyl:2H(3) [N-Term]	P12763 1xCarbamidomethyl [C32]; 2xAcetyl:2H(3) [K28; K50]; 1xAcetyl:2H(3) [N-Term]	TRUE	FBS	9.75896e-05	0	1	1	98	P12763	P12763 [19-54]	0	4098.05	0	1.112	0.15	0.961721	45.7	1.851	0.769	1.112	0.89	-0.38	0.15	92.2	107.8	26.96	27.26	3	3	76.4	121	79.6	141.4	93.1	88.5	1	1	1	1	1	1	76.4	121	79.6	141.4	93.1
FALSE	High	[R].LPIQEAFLGAMR.[T]			TRUE	FBS	0.00272231	0	1	1	2	Q9N2I2	Q9N2I2 [135-146]	0	1345.73	0	0.296	-1.75	0.336513	0.05	0.734	0.296	0.295	-0.45	-1.75	-1.76	154.3	45.7	80	70.46	3	3	12.1	213.5	233.3	8.9	63.3	68.9	1	1	1	1	1	1	12.1	213.5	233.3	8.9	63.3
FALSE	High	[R].LQAIEHELHELGLLKDHSLEGR.[Y]	1xAcetyl:2H(3) [K15]	Q16769 1xAcetyl:2H(3) [K285]	FALSE		1.60723e-07	0	1	1	6	Q16769	Q16769 [271-292]	0	2582.38	0	0.085	-3.55	0.00109935	0.66	0.152	0.048		-2.72	-4.38		184.3	15.7	30.5	48.67	2	2	216.1	335		32.9	16		1	1		1	1		216.1	335		32.9	16
FALSE	High	[R].LQAYHTQTTPLIEYYR.[K]	1xAcetyl:2H(3) [N-Term]	P54819 1xAcetyl:2H(3) [N-Term]	FALSE		4.23718e-05	0	1	1	1	P54819	P54819 [187-202]	0	2042.04	0	0.811	-0.3	0.935736	29.78	0.811	3.703	0.563	-0.3	1.89	-0.83	56.8	143.2	84.89	60.99	3	3	182.7	38.4	56.5	148.1	142.4	31.8	1	1	1	1	1	1	182.7	38.4	56.5	148.1	142.4
FALSE	High	[R].LQDEIQNMKEEMAR.[H]	1xAcetyl:2H(3) [K9]	P08670 1xAcetyl:2H(3) [K373]	FALSE		0.000815888	0	1	1	23	P08670	P08670 [365-378]	0	1779.84	0	2.923	1.55	0.0825698	44.52	1.073	3.8	2.923	0.1	1.93	1.55	44.6	155.4	74.64	12.41	3	3	126.7	38.4	39	135.9	146	114	1	1	1	1	1	1	126.7	38.4	39	135.9	146
FALSE	High	[R].LQDTATATTEDPELLAFLSR.[Y]			FALSE		0.0024116	0	1	1	1	Q495W5	Q495W5 [254-273]	0	2192.11	0	0.01	-6.64	1.64805e-16	0	0.01	0.01	0.534	-6.64	-6.64	-0.91	128.9	71.1	22.04		3	1	184.2	124	190.2			101.6	1	1	1			1	184.2	124	190.2
FALSE	High	[R].LQDYEEKTKKAER.[E]	3xAcetyl:2H(3) [K7; K9; K10]	P15311 3xAcetyl:2H(3) [K357; K359; K360]	FALSE		0.000575639	0	1	1	26	P15311	P15311 [351-363]	0	1772.94	0	1.98	0.99	0.432921	94.17	0.722	1.98	4.771	-0.47	0.99	2.25	67.1	132.9	46.66	39.04	3	3	100.4	74.8	35.4	72.5	148.2	168.7	1	1	1	1	1	1	100.4	74.8	35.4	72.5	148.2
FALSE	High	[R].LQDYEEKTKKAER.[E]	3xAcetyl:2H(3) [K7; K9; K10]; 1xAcetyl:2H(3) [N-Term]	P15311 3xAcetyl:2H(3) [K357; K359; K360]; 1xAcetyl:2H(3) [N-Term]	FALSE		0.000461998	0	1	1	17	P15311	P15311 [351-363]	0	1817.97	0	2.018	1.01	0.698531	100.91	0.645	2.018	4.497	-0.63	1.01	2.17	80.3	119.7	51.16	75.18	3	3	106.2	40.6	55.1	68.4	82	247.6	1	1	1	1	1	1	106.2	40.6	55.1	68.4	82
FALSE	High	[R].IQEAGTEVVKAKAGAGSATLSMAYAGAR.[F]	2xAcetyl:2H(3) [K10; K12]	P40926 2xAcetyl:2H(3) [K239; K241]	FALSE		0.00131535	0	1	1	38	P40926	P40926 [230-257]	0	2798.46	0	0.756	-0.4	0.939152	2.79	0.781	0.255	0.756	-0.36	-1.97	-0.4	116.3	83.7	81.99	27.04	3	3	53.7	268.8	95.2	41.9	68.5	71.9	1	1	1	1	1	1	53.7	268.8	95.2	41.9	68.5
FALSE	High	[R].IQEAGTEVVKAKAGAGSATLSMAYAGAR.[F]	1xOxidation [M22]; 2xAcetyl:2H(3) [K10; K12]	P40926 1xOxidation [M251]; 2xAcetyl:2H(3) [K239; K241]	FALSE		0.000494632	0	1	1	6	P40926	P40926 [230-257]	0	2814.46	0	0.411	-1.28	0.591508	0.22	0.081	0.415	0.411	-3.62	-1.27	-1.28	149.8	50.2	35.34	50.49	3	3	222	140.3	114.4	18	58.2	47.1	1	1	1	1	1	1	222	140.3	114.4	18	58.2
FALSE	High	[R].LQEGYDHSYYFIATFITDHIR.[H]			FALSE		0.000116188	0	1	1	13	P10768	P10768 [254-274]	0	2589.24	0	0.553	-0.85	0.792007	8.23	1.261	0.453	0.553	0.34	-1.14	-0.85	128.8	71.2	135.43	114.65	3	3	17.8	341.7	40.8	22.4	154.7	22.6	1	1	1	1	1	1	17.8	341.7	40.8	22.4	154.7
FALSE	High	[R].LQEKEDLQELNDR.[L]	1xAcetyl:2H(3) [K4]	P02545 1xAcetyl:2H(3) [K32]	FALSE		0.00068532	0	1	1	6	P02545	P02545 [29-41]	0	1674.84	0	5.253	2.39	0.368082	117.96	0.854	9.432	5.253	-0.23	3.24	2.39	32	168	112.18	16.78	3	3	139.4	17.5	25.5	119	164.8	133.9	1	1	1	1	1	1	139.4	17.5	25.5	119	164.8
FALSE	High	[R].LQEVPHEGPMCDLLWSDPDDR.[G]	1xCarbamidomethyl [C11]	P62714 1xCarbamidomethyl [C196]; P67775 1xCarbamidomethyl [C196]	FALSE		0.00026558	0	2	2	2	P62714; P67775	P62714 [186-206]; P67775 [186-206]	0	2509.11	0	0.326	-1.62	0.372763	15.27	0.01	0.851	0.326	-6.64	-0.23	-1.62	116.7	83.3	83.24	92.55	3	2	20.6	225.1	122.8		191.6	40	1	1	1		1	1	20.6	225.1	122.8		191.6
FALSE	High	[R].LQEVTKTDQDLYR.[C]	1xAcetyl:2H(3) [K6]	Q15262 1xAcetyl:2H(3) [K262]	FALSE		0.000472629	0	1	1	5	Q15262	Q15262 [257-269]	0	1653.85	0	1.134	0.18	0.998323	126.48	0.167	1.134	2.626	-2.59	0.18	1.39	89.6	110.4	47.47	73.57	3	3	104.1	141.3	48.8	17.3	160.2	128.2	1	1	1	1	1	1	104.1	141.3	48.8	17.3	160.2
FALSE	High	[R].LQLKHFSLLTIMTNR.[I]	1xAcetyl:2H(3) [K4]	F1N5M2 1xAcetyl:2H(3) [K207]	TRUE	FBS	3.58601e-05	0	1	1	12	F1N5M2	F1N5M2 [204-218]	0	1860.06	0	0.308	-1.7	0.149434	10.43	1.332	0.308	0.08	0.41	-1.7	-3.64	179	21	107.48	125.87	3	3	10.5	341.6	119.1	14	105.3	9.5	1	1	1	1	1	1	10.5	341.6	119.1	14	105.3
FALSE	High	[R].IQQEIAVQNPLVSER.[L]			FALSE		0.00252373	0	1	1	5	Q96FW1	Q96FW1 [37-51]	0	1723.93	0	1.162	0.22	0.993103	20.84	0.769	1.162	1.325	-0.38	0.22	0.41	93.4	106.6	54.05	34.67	3	3	153.7	103.4	45	118.2	120.2	59.6	1	1	1	1	1	1	153.7	103.4	45	118.2	120.2
FALSE	High	[R].LQSLEVGTDWDPKER.[L]	1xAcetyl:2H(3) [K13]	Q9H1B5 1xAcetyl:2H(3) [K655]	FALSE		0.00391554	0	1	1	1	Q9H1B5	Q9H1B5 [643-657]	0	1817.91	0	1	0	0.975159	7412.26	0.01		100	-6.64		6.64	86.7	113.3			1	1	260					340	1					1	260
FALSE	High	[R].LRDPEVVASELGYVFQAITLTR.[Q]	1xAcetyl:2H(3) [N-Term]	P06132 1xAcetyl:2H(3) [N-Term]	FALSE		0.00237534	0	1	1	1	P06132	P06132 [121-142]	1	2522.37	0	0.495	-1.01	0.740678	35.63	0.01	0.495	100	-6.64	-1.01	6.64	105.9	94.1	113.82	68.35	2	2	36.5	337.9			167.3	58.3	1	1			1	1	36.5	337.9			167.3
FALSE	High	[A].LRPGDCEVCISYLGR.[F]	2xCarbamidomethyl [C6; C9]; 1xAcetyl:2H(3) [N-Term]	P55145 2xCarbamidomethyl [C30; C33]; 1xAcetyl:2H(3) [N-Term]	FALSE		0.000167213	0	1	1	37	P55145	P55145 [25-39]	0	1839.89	0	0.948	-0.08	0.998323	44.4	0.948	1.397	0.633	-0.08	0.48	-0.66	102.6	97.4	27.11	62.79	3	3	96.3	123.6	71	91.3	172.7	45	1	1	1	1	1	1	96.3	123.6	71	91.3	172.7
FALSE	High	[R].LSAEDLVLEGAGLR.[V]			FALSE		0.000448194	0	1	1	7	P11047	P11047 [590-603]	0	1442.78	0	0.769	-0.38	0.96164	3.48	0.222	0.769	0.8	-2.17	-0.38	-0.32	128.6	71.4	76.4	33.58	3	3	258.6	55.1	103.6	57.5	42.4	82.8	1	1	1	1	1	1	258.6	55.1	103.6	57.5	42.4
FALSE	High	[R].LSALAAGDGSGYTCR.[Y]	1xCarbamidomethyl [C14]; 1xAcetyl:2H(3) [N-Term]	Q2KJF1 1xCarbamidomethyl [C282]; 1xAcetyl:2H(3) [N-Term]	TRUE	FBS	0.000907252	0	1	1	8	Q2KJF1	Q2KJF1 [269-283]	0	1543.72	0	0.512	-0.97	0.768903	31.77	2.231	0.512	0.094	1.16	-0.97	-3.41	121.8	78.2	33.81	91.06	3	3	73.9	151.4	120.9	165	77.5	11.3	1	1	1	1	1	1	73.9	151.4	120.9	165	77.5
FALSE	High	[R].LSDKGLKAELMER.[L]	2xAcetyl:2H(3) [K4; K7]	Q00839 2xAcetyl:2H(3) [K28; K31]	FALSE		0.00289236	0	1	1	3	Q00839	Q00839 [25-37]	0	1579.86	0	3.201	1.68	0.634769	68.15	0.637	3.201	4.673	-0.65	1.68	2.22	47.6	152.4	61.85	44.04	3	3	112.8	44.2	40.5	71.8	141.4	189.4	1	1	1	1	1	1	112.8	44.2	40.5	71.8	141.4
FALSE	High	[R].LSEDYGVLKTDEGIAYR.[G]	1xAcetyl:2H(3) [K9]	P32119 1xAcetyl:2H(3) [K119]	FALSE		7.02147e-06	0	1	1	34	P32119	P32119 [111-127]	0	1973.99	0	1.538	0.62	0.770446	68.45	1.538	2.248	0.452	0.62	1.17	-1.14	78.8	121.2	14.92	54.9	3	3	83.9	74.5	99.9	129.1	167.4	45.2	1	1	1	1	1	1	83.9	74.5	99.9	129.1	167.4
FALSE	High	[R].LSEDYGVLKTDEGIAYR.[G]	1xAcetyl:2H(3) [K9]; 1xAcetyl:2H(3) [N-Term]	P32119 1xAcetyl:2H(3) [K119]; 1xAcetyl:2H(3) [N-Term]	FALSE		4.01809e-05	0	1	1	21	P32119	P32119 [111-127]	0	2019.02	0	1.442	0.53	0.956462	75.77	1.442	3.798	0.705	0.53	1.93	-0.5	101.1	98.9	76.73	73.04	3	3	148.6	20.8	80.6	214.2	78.9	56.8	1	1	1	1	1	1	148.6	20.8	80.6	214.2	78.9
FALSE	High	[R].ISELEKGQKDNRPGDKFQLTFPLR.[T]	3xAcetyl:2H(3) [K6; K9; K16]	Q15818 3xAcetyl:2H(3) [K217; K220; K227]	FALSE		5.63515e-06	0	1	1	23	Q15818	Q15818 [212-235]	0	2951.59	0	0.221	-2.18	0.0169494	3.34	0.221	0.119	0.863	-2.18	-3.07	-0.21	127.3	72.7	72.02	78.38	3	3	268.6	69.9	104	59.4	8.3	89.8	1	1	1	1	1	1	268.6	69.9	104	59.4	8.3
FALSE	High	[R].LSEMTEAEQQQLIDDHFLFDKPVSPLLTAAGMAR.[D]	1xAcetyl:2H(3) [K21]	P12532 1xAcetyl:2H(3) [K229]	FALSE		1.60495e-05	0	1	1	10	P12532	P12532 [209-242]	0	3846.91	0	0.374	-1.42	0.48986	8.1		0.548	0.256		-0.87	-1.97	145.5	54.5	96.83	118.7	2	2		336.6	63		184.3	16.1		1	1		1	1		336.6	63		184.3
FALSE	High	[R].LSLQNTAEIQHCLVNAGDVGCGVFECFENNSCEIR.[G]	4xCarbamidomethyl [C12; C21; C26; C32]	O76061 4xCarbamidomethyl [C56; C65; C70; C76]	FALSE		5.23969e-05	0	1	1	3	O76061	O76061 [45-79]	0	4040.8	0	0.945	-0.08	0.967382	8.24	1.004	0.308	0.945	0.01	-1.7	-0.08	125.2	74.8	56.02	32.37	3	3	104.4	200.6	66.1	104.8	61.7	62.4	1	1	1	1	1	1	104.4	200.6	66.1	104.8	61.7
FALSE	High	[R].LSLQNTAEIQHCLVNAGDVGCGVFECFENNSCEIR.[G]	4xCarbamidomethyl [C12; C21; C26; C32]; 1xAcetyl:2H(3) [N-Term]	O76061 4xCarbamidomethyl [C56; C65; C70; C76]; 1xAcetyl:2H(3) [N-Term]	FALSE		0.000680144	0	1	1	3	O76061	O76061 [45-79]	0	4085.83	0	0.222	-2.17	0.15117	2.45	100	0.222	0.147	6.64	-2.17	-2.77	149.6	50.4	56.07	66.2	2	3		292.1	126.2	98.4	64.7	18.5		1	1	1	1	1		292.1	126.2	98.4	64.7
FALSE	High	[R].LSQKFPKAEFVEVTKLVTDLTKVHKECCHGDLLECADDR.[A]	3xCarbamidomethyl [C27; C28; C35]; 5xAcetyl:2H(3) [K4; K7; K15; K22; K25]	P02769 3xCarbamidomethyl [C268; C269; C276]; 5xAcetyl:2H(3) [K245; K248; K256; K263; K266]	TRUE	FBS	1.34389e-06	0	1	1	40	P02769	P02769 [242-280]	0	4841.44	0	1.114	0.16	0.961288	7.15	1.114	1.06	1.415	0.16	0.08	0.5	88.1	111.9	12.36	19.95	3	3	102.7	80.2	90.1	114.4	85.1	127.6	1	1	1	1	1	1	102.7	80.2	90.1	114.4	85.1
FALSE	High	[R].IYDDDFFQNLDGVANALDNVDAR.[M]			FALSE		1.56884e-05	0	1	1	14	P22314	P22314 [559-581]	0	2600.19	0	1.536	0.62	0.914729	46.96	0.073	2.022	1.536	-3.78	1.02	0.62	78.9	121.1	29.51	79.47	3	3	133	79.1	86.1	9.7	160	132.2	1	1	1	1	1	1	133	79.1	86.1	9.7	160
FALSE	High	[R].IYDDDFFQNLDGVANALDNVDAR.[M]	1xAcetyl:2H(3) [N-Term]	P22314 1xAcetyl:2H(3) [N-Term]	FALSE		5.36028e-05	0	1	1	18	P22314	P22314 [559-581]	0	2645.22	0	1.745	0.8	0.850913	53.66	0.078	1.745	2.377	-3.67	0.8	1.25	88.7	111.3	50.08	88.56	3	3	152.1	58.6	81.5	11.9	102.2	193.7	1	1	1	1	1	1	152.1	58.6	81.5	11.9	102.2
FALSE	High	[R].LYIGLAGLATDVQTVAQR.[L]			FALSE		6.28577e-05	0	1	1	5	P49720	P49720 [49-66]	0	1889.05	0	0.84	-0.25	0.908591	79.04	0.418	1.687		-1.26	0.75		108.7	91.3	135.93	120.52	2	2	407.7	8.1		170.6	13.6		1	1		1	1		407.7	8.1		170.6	13.6
FALSE	High	[R].LYIGLAGLATDVQTVAQR.[L]	1xAcetyl:2H(3) [N-Term]	P49720 1xAcetyl:2H(3) [N-Term]	FALSE		4.43446e-05	0	1	1	27	P49720	P49720 [49-66]	0	1934.08	0	1.408	0.49	0.97316	1.56	1.393	1.408	1.869	0.48	0.49	0.9	73.9	126.1	41.02	45.16	3	3	42.4	104.4	86.2	59.1	147	161.1	1	1	1	1	1	1	42.4	104.4	86.2	59.1	147
FALSE	High	[P].MFIVNTNVPR.[A]			FALSE		0.0040975	0	1	1	3	P14174	P14174 [3-12]	0	1190.64	0	1.531	0.61	0.976077	7.64		1.454	1.612		0.54	0.69	79	121	39.91	33.12	2	2		153.2	85.8		222.8	138.2		1	1		1	1		153.2	85.8		222.8
FALSE	High	[R].MFNGEKINYTEGR.[A]	1xAcetyl:2H(3) [K6]	P06744 1xAcetyl:2H(3) [K89]	FALSE		0.0024116	0	1	1	8	P06744	P06744 [84-96]	0	1603.76	0	0.904	-0.15	0.986008	22.62	0.736	0.904	1.497	-0.44	-0.15	0.58	101	99	48.46	38.76	3	3	90.1	155.5	59.1	66.3	140.6	88.4	1	1	1	1	1	1	90.1	155.5	59.1	66.3	140.6
FALSE	High	[R].MGHGDEIVLADLNFPASSICQCGPMEIR.[A]	2xCarbamidomethyl [C20; C22]	A2VDF0 2xCarbamidomethyl [C41; C43]	FALSE		7.31537e-05	0	1	1	2	A2VDF0	A2VDF0 [22-49]	0	3117.43	0	100	6.64	1.64805e-16	0	100	6.608	100	6.64	2.72	6.64	41.5	158.5		41.75	1	3		41.5		158.3	274	126.2		1		1	1	1		41.5		158.3	274
FALSE	High	[-].MGKVKVGVNGFGR.[I]	2xAcetyl:2H(3) [K3; K5]; 1xAcetyl:2H(3) [N-Term]	P04406 2xAcetyl:2H(3) [K3; K5]; 1xAcetyl:2H(3) [N-Term]	FALSE		0.000479853	0	1	1	9	P04406	P04406 [1-13]	0	1483.84	0	0.849	-0.24	0.975159	76.09	0.849	2.196	0.245	-0.24	1.14	-2.03	108.1	91.9	18	75.51	3	3	107.5	80.6	115.3	91.3	177	28.3	1	1	1	1	1	1	107.5	80.6	115.3	91.3	177
FALSE	High	[Y].MHSGPVVAMVWEGLNVVKTGR.[V]	1xAcetyl:2H(3) [K18]	P15531 1xAcetyl:2H(3) [K85]	FALSE		0.000815888	0	1	1	25	P15531	P15531 [68-88]	0	2312.21	0	3.678	1.88	0.546793	25.15	5.499	3.054	3.678	2.46	1.61	1.88	49.3	150.7	51.26	39.72	3	3	18.7	47.2	61.4	102.7	144.2	225.8	1	1	1	1	1	1	18.7	47.2	61.4	102.7	144.2
FALSE	High	[Y].MHSGPVVAMVWEGLNVVKTGR.[V]	1xOxidation [M]; 1xAcetyl:2H(3) [K18]	P15531 1xOxidation [M]; 1xAcetyl:2H(3) [K85]	FALSE		0.0023934	0	1	1	9	P15531	P15531 [68-88]	0	2328.2	0	2.264	1.18	0.947304	21.48	2.592	1.219	2.264	1.37	0.29	1.18	67.5	132.5	50.48	65.53	3	3	40.4	53.3	103.1	104.7	65	233.4	1	1	1	1	1	1	40.4	53.3	103.1	104.7	65
FALSE	High	[C].MKAVTEQGAELSNEER.[N]	1xOxidation [M1]; 1xAcetyl:2H(3) [K2]	P27348 1xOxidation [M26]; 1xAcetyl:2H(3) [K27]	FALSE		4.17339e-05	0	1	1	16	P27348	P27348 [26-41]	0	1852.88	0
FALSE	High	[Q].MKETIMNQEKLAKLQAQVR.[I]	3xAcetyl:2H(3) [K2; K10; K13]; 1xAcetyl:2H(3) [N-Term]	P20290 3xAcetyl:2H(3) [K46; K54; K57]; 1xAcetyl:2H(3) [N-Term]	FALSE		0.00088685	0	1	1	4	P20290	P20290 [45-63]	0	2439.35	0	3.616	1.85	0.268816	14.82	3.255	3.616	4.138	1.7	1.85	2.05	43.3	156.7	76.03	65.99	3	3	83.3	32.4	18.6	271.2	117.3	77.2	1	1	1	1	1	1	83.3	32.4	18.6	271.2	117.3
FALSE	High	[Q].MKETIMNQEKLAKLQAQVR.[I]	1xOxidation [M6]; 3xAcetyl:2H(3) [K2; K10; K13]; 1xAcetyl:2H(3) [N-Term]	P20290 1xOxidation [M50]; 3xAcetyl:2H(3) [K46; K54; K57]; 1xAcetyl:2H(3) [N-Term]	FALSE		0.00397528	0	1	1	7	P20290	P20290 [45-63]	0	2455.34	0	23.737	4.57	0.00139622	139.65	1.378	100	23.737	0.46	6.64	4.57	41.5	158.5	134.28	59.23	2	3	171.9		4.4	236.8	81.3	105.6	1		1	1	1	1	171.9		4.4	236.8	81.3
FALSE	High	[-].MKFQYKEDHPFEYR.[K]	2xAcetyl:2H(3) [K2; K6]; 1xAcetyl:2H(3) [N-Term]	Q9H0R8 2xAcetyl:2H(3) [K2; K6]; 1xAcetyl:2H(3) [N-Term]	FALSE		0.000400001	0	1	1	4	Q9H0R8	Q9H0R8 [1-14]	0	2052.98	0	2.699	1.43	0.909743	42.24	2.699	1.93	100	1.43	0.95	6.64	84.1	115.9	45.92	76.13	2	3	102.7	52.4		277.2	101.1	66.7	1	1		1	1	1	102.7	52.4		277.2	101.1
FALSE	High	[-].MKFVYKEEHPFEKR.[R]	3xAcetyl:2H(3) [K2; K6; K13]; 1xAcetyl:2H(3) [N-Term]	O95166 3xAcetyl:2H(3) [K2; K6; K13]; 1xAcetyl:2H(3) [N-Term]	FALSE		9.90812e-05	0	1	1	25	O95166	O95166 [1-14]	0	2048.07	0	1.701	0.77	0.604349	30.68	3.623	1.349	1.701	1.86	0.43	0.77	51	149	50.75	32.48	3	3	46.2	107.4	49.6	167.5	144.9	84.4	1	1	1	1	1	1	46.2	107.4	49.6	167.5	144.9
FALSE	High	[-].MKGKEEKEGGAR.[L]	3xAcetyl:2H(3) [K2; K4; K7]; 1xAcetyl:2H(3) [N-Term]	Q9UNE7 3xAcetyl:2H(3) [K2; K4; K7]; 1xAcetyl:2H(3) [N-Term]	FALSE		0.000521598	0	1	1	16	Q9UNE7	Q9UNE7 [1-12]	0	1499.79	0	1.163	0.22	0.982054	0.15	1.172	1.162	1.163	0.23	0.22	0.22	92.5	107.5	31.93	32.37	3	3	123.1	89.4	64.4	144.3	103.9	74.9	1	1	1	1	1	1	123.1	89.4	64.4	144.3	103.9
FALSE	High	[-].MKIEEVKSTTKTQR.[I]	3xAcetyl:2H(3) [K2; K7; K11]; 1xAcetyl:2H(3) [N-Term]	Q9Y265 3xAcetyl:2H(3) [K2; K7; K11]; 1xAcetyl:2H(3) [N-Term]	FALSE		0.000620987	0	1	1	6	Q9Y265	Q9Y265 [1-14]	0	1859.03	0	2.717	1.44	0.503019	96.8	0.943	5.775	2.717	-0.08	2.53	1.44	46.8	153.2	117.6	37.12	3	3	183.7	18.2	32.2	173.2	105.3	87.4	1	1	1	1	1	1	183.7	18.2	32.2	173.2	105.3
FALSE	High	[-].MKLPIFIADAFTAR.[A]	1xAcetyl:2H(3) [K2]; 1xAcetyl:2H(3) [N-Term]	P30039 1xAcetyl:2H(3) [K2]; 1xAcetyl:2H(3) [N-Term]	FALSE		0.000203662	0	1	1	7	P30039	P30039 [1-14]	0	1683.94	0	1.287	0.36	0.995286	63.28	1.836	1.287	0.224	0.88	0.36	-2.16	70.5	129.5	51.89	79.69	3	3	78.1	139.3	49	143.4	179.2	11	1	1	1	1	1	1	78.1	139.3	49	143.4	179.2
FALSE	High	[-].MKPLVVFVLGGPGAGKGTQCAR.[I]	1xCarbamidomethyl [C20]; 2xAcetyl:2H(3) [K2; K16]; 1xAcetyl:2H(3) [N-Term]	P30085 1xCarbamidomethyl [C20]; 2xAcetyl:2H(3) [K2; K16]; 1xAcetyl:2H(3) [N-Term]	FALSE		2.01787e-07	0	1	1	58	P30085	P30085 [1-22]	0	2378.3	0	1.815	0.86	0.540054	45.59	2.374	1.016	1.815	1.25	0.02	0.86	59.3	140.7	77.17	33.49	3	3	47.2	156.4	44.5	112.1	158.9	80.9	1	1	1	1	1	1	47.2	156.4	44.5	112.1	158.9
FALSE	High	[C].MKSVTEQGAELSNEER.[N]	1xAcetyl:2H(3) [K2]	P63104 1xAcetyl:2H(3) [K27]	FALSE		1.58079e-05	0	1	1	19	P63104	P63104 [26-41]	0	1852.88	3	1.052	0.07	0.999983	5.1	1.43	1.016	1.052	0.52	0.02	0.07	97.5	102.5	55.98	43.51	3	3	53.3	155	77	76.2	157.5	81	1	1	1	1	1	1	53.3	155	77	76.2	157.5
FALSE	High	[-].MKWMFKEDHSLEHR.[C]	2xAcetyl:2H(3) [K2; K6]; 1xAcetyl:2H(3) [N-Term]	P60520 2xAcetyl:2H(3) [K2; K6]; 1xAcetyl:2H(3) [N-Term]	FALSE		0.0010399	0	1	1	11	P60520	P60520 [1-14]	0	2008.97	0	2.772	1.47	0.175473	67.34	9.866	2.772	1.513	3.3	1.47	0.6	37.9	162.1	68.55	54.04	3	3	17.7	80.7	41	174.9	223.7	62	1	1	1	1	1	1	17.7	80.7	41	174.9	223.7
FALSE	High	[R].MIAGQVLDINLAAEPKVNR.[G]	1xAcetyl:2H(3) [K16]	P07910 1xAcetyl:2H(3) [K89]	FALSE		0.0016263	0	1	1	16	P07910	P07910 [74-92]	0	2097.16	0	1.419	0.5	0.970975	14.89	1.419	1.561	1.074	0.5	0.64	0.1	86.5	113.5	42.99	39.06	3	3	45.3	96.3	117.6	64.3	150.3	126.3	1	1	1	1	1	1	45.3	96.3	117.6	64.3	150.3
FALSE	High	[R].MIAGQVLDINLAAEPKVNR.[G]	1xOxidation [M1]; 1xAcetyl:2H(3) [K16]	P07910 1xOxidation [M74]; 1xAcetyl:2H(3) [K89]	FALSE		3.02557e-06	0	1	1	25	P07910	P07910 [74-92]	0	2113.15	3	1.239	0.31	0.988196	4.11	1.858	1.239	1.204	0.89	0.31	0.27	70	130	59.44	48.31	3	3	64.6	46.8	140.9	120.1	57.9	169.7	1	1	1	1	1	1	64.6	46.8	140.9	120.1	57.9
FALSE	High	[-].MIEVVCNDR.[L]	1xCarbamidomethyl [C6]; 1xAcetyl:2H(3) [N-Term]	Q9BZL1 1xCarbamidomethyl [C6]; 1xAcetyl:2H(3) [N-Term]	FALSE		0.00379875	0	1	1	31	Q9BZL1	Q9BZL1 [1-9]	0	1180.55	0	0.56	-0.84	0.80478	1.31	0.56	1.655	0.544	-0.84	0.73	-0.88	126.4	73.6	4.63	67.68	3	3	100.8	102.8	110	56.5	170	59.9	1	1	1	1	1	1	100.8	102.8	110	56.5	170
FALSE	High	[M].MLGPEGGEGFVVKLR.[G]	1xAcetyl [N-Term]; 1xAcetyl:2H(3) [K13]	P52597 1xAcetyl [N-Term]; 1xAcetyl:2H(3) [K14]	FALSE		0.0016891	0	1	1	23	P52597	P52597 [2-16]	0	1675.89	1	2.091	1.06	0.34221	35.4	2.091	1.497	2.59	1.06	0.58	1.37	72.8	127.2	44.55	47.34	3	3	98.6	60	40.5	206.2	89.8	104.9	1	1	1	1	1	1	98.6	60	40.5	206.2	89.8
FALSE	High	[-].MLGSGFKAER.[L]	1xAcetyl [N-Term]; 1xAcetyl:2H(3) [K7]	P53990 1xAcetyl [N-Term]; 1xAcetyl:2H(3) [K7]	FALSE		0.00242994	0	1	1	12	P53990	P53990 [1-10]	0	1182.6	0	1.257	0.33	0.975159	18.92	1.257	5.359	1.097	0.33	2.42	0.13	47.9	152.1	109.99	73.32	3	3	173.9	21	35.4	218.6	112.3	38.8	1	1	1	1	1	1	173.9	21	35.4	218.6	112.3
FALSE	High	[R].MLKKKIEEEAAKYR.[N]	4xAcetyl:2H(3) [K3; K4; K5; K12]; 1xAcetyl:2H(3) [N-Term]	F1MY85 4xAcetyl:2H(3) [K680; K681; K682; K689]; 1xAcetyl:2H(3) [N-Term]	TRUE	FBS	0.000620987	0	1	1	1	F1MY85	F1MY85 [678-691]	0	1962.12	0	100	6.64	1.64805e-16	0	100			6.64				200				1				600						1						600
FALSE	High	[-].MIKLFSLKQQKKEEESAGGTKGSSKKASAAQLR.[I]	1xAcetyl [N-Term]; 7xAcetyl:2H(3) [K3; K8; K11; K12; K21; K25; K26]	P61081 1xAcetyl [N-Term]; 7xAcetyl:2H(3) [K3; K8; K11; K12; K21; K25; K26]	FALSE		0.00204138	0	1	1	7	P61081	P61081 [1-33]	0	3922.17	0	4.655	2.22	0.247969	33.35	5.727	3.608	4.655	2.52	1.85	2.22	35.4	164.6	45.9	26.36	3	3	19.9	54.3	38.1	114.2	196	177.4	1	1	1	1	1	1	19.9	54.3	38.1	114.2	196
FALSE	High	[-].MLKSKTFLKKTR.[A]	1xAcetyl [N-Term]; 4xAcetyl:2H(3) [K3; K5; K9; K10]	Q9Y2L1 1xAcetyl [N-Term]; 4xAcetyl:2H(3) [K3; K5; K9; K10]	FALSE		0.0016891	0	1	1	2	Q9Y2L1	Q9Y2L1 [1-12]	0	1703.03	0	100	6.64	1.64805e-16	0	1.071	100	100	0.1	6.64	6.64	141.8	58.2		64.72	1	3	211.2			226.2	86.7	75.8	1			1	1	1	211.2			226.2	86.7
FALSE	High	[R].MLLLKGFGKDGFR.[F]	2xAcetyl:2H(3) [K5; K9]; 1xAcetyl:2H(3) [N-Term]	Q9NVS9 2xAcetyl:2H(3) [K100; K104]; 1xAcetyl:2H(3) [N-Term]	FALSE		6.8847e-05	0	1	1	2	Q9NVS9	Q9NVS9 [96-108]	0	1616.92	0	1.303	0.38	0.998244	19.86	1.643	1.303	1.128	0.72	0.38	0.17	86.9	113.1	12.36	6.79	3	3	73.7	89.3	93.8	121	116.4	105.8	1	1	1	1	1	1	73.7	89.3	93.8	121	116.4
FALSE	High	[F].MILPVGAANFR.[E]			FALSE		0.00232197	0	1	1	5	P06733	P06733 [169-179]	0	1188.66	0	0.41	-1.29	0.661809	18.78	0.41	1.065	0.101	-1.29	0.09	-3.31	154.9	45.1	45.94	94.89	3	3	85.6	120.7	209.1	35.1	128.5	21.1	1	1	1	1	1	1	85.6	120.7	209.1	35.1	128.5
FALSE	High	[-].MLVLVLGDLHIPHR.[C]	1xAcetyl:2H(3) [N-Term]	Q9UBQ0 1xAcetyl:2H(3) [N-Term]	FALSE		0.000509866	0	1	1	43	Q9UBQ0	Q9UBQ0 [1-14]	0	1657.96	0	2.314	1.21	0.665313	27.19	2.738	0.613	2.314	1.45	-0.71	1.21	60.4	139.6	134.14	68.25	3	3	14.5	269.4	33.6	39.6	165	77.8	1	1	1	1	1	1	14.5	269.4	33.6	39.6	165
FALSE	High	[-].MMCGAPSATQPATAETQHIADQVR.[S]	1xAcetyl [N-Term]; 1xCarbamidomethyl [C3]	P04080 1xAcetyl [N-Term]; 1xCarbamidomethyl [C3]	FALSE		3.3494e-05	0	1	1	25	P04080	P04080 [1-24]	0	2613.19	0	1.714	0.78	0.608179	25.17	2.119	1.423	1.714	1.08	0.51	0.78	65.8	134.2	93.5	76.46	3	3	35.1	161.6	36.4	74.4	230	62.5	1	1	1	1	1	1	35.1	161.6	36.4	74.4	230
FALSE	High	[-].MEYLIGIQGPDYVLVASDR.[V]	1xAcetyl [N-Term]	P49721 1xAcetyl [N-Term]	FALSE		6.23828e-05	0	1	1	36	P49721	P49721 [1-19]	0	2181.09	0	6.52	2.7	0.00631324	40.12	6.52	0.57	8.284	2.7	-0.81	3.05	32.6	167.4	143.25	71.72	3	3	4.7	217.1	24.1	30.7	123.7	199.7	1	1	1	1	1	1	4.7	217.1	24.1	30.7	123.7
FALSE	High	[S].IPLDPVAGYKEPACDDPDTEQAALAAVDYINKHLPR.[G]	1xAcetyl [N-Term]; 1xCarbamidomethyl [C14]; 2xAcetyl:2H(3) [K10; K32]	P12763 1xAcetyl [N-Term]; 1xCarbamidomethyl [C32]; 2xAcetyl:2H(3) [K28; K50]	TRUE	FBS	0.00270177	0	1	1	6	P12763	P12763 [19-54]	0	4095.03	0	1.147	0.2	0.986492	11.31	58.259	1.147	1.059	5.86	0.2	0.08	86.8	113.2	77.2	89.53	3	3	5.4	71.5	62.9	311.8	81.9	66.6	1	1	1	1	1	1	5.4	71.5	62.9	311.8	81.9
FALSE	High	[-].METEQPEETFPNTETNGEFGKRPAEDMEEEQAFKR.[S]	1xAcetyl [N-Term]; 2xAcetyl:2H(3) [K21; K34]	P61978 1xAcetyl [N-Term]; 2xAcetyl:2H(3) [K21; K34]	FALSE		0.00412863	0	1	1	4	P61978	P61978 [1-35]	0	4263.89	0	100	6.64	1.64805e-16	0	0.913	100	100	-0.13	6.64	6.64	139.5	60.5		82.5	1	3	243.8			222.6	27.9	105.7	1			1	1	1	243.8			222.6	27.9
FALSE	High	[R].MEQFQKEKEELDR.[G]	2xAcetyl:2H(3) [K6; K8]	Q16543 2xAcetyl:2H(3) [K45; K47]	FALSE		0.000379319	0	1	1	6	Q16543	Q16543 [40-52]	0	1799.88	0	2.545	1.35	0.584869	58.87	1.534	2.545	3.76	0.62	1.35	1.91	66.9	133.1	53.08	28.98	3	3	90.5	69.8	25.9	138.8	177.5	97.6	1	1	1	1	1	1	90.5	69.8	25.9	138.8	177.5
FALSE	High	[D].MADCCEKQEPER.[N]	2xCarbamidomethyl [C4; C5]; 1xAcetyl:2H(3) [K7]	P02769 2xCarbamidomethyl [C114; C115]; 1xAcetyl:2H(3) [K117]	TRUE	FBS	0.00391554	0	1	1	4	P02769	P02769 [111-122]	0	1597.65	0	2.01	1.01	0.772052	134.87	4.546	0.889		2.18	-0.17		66.4	133.6	125.59	75.6	2	2	16	270.6		72.9	240.5		1	1		1	1		16	270.6		72.9	240.5
FALSE	High	[R].MALENYLAALQSDPPRPHR.[I]	1xAcetyl:2H(3) [N-Term]	Q06481 1xAcetyl:2H(3) [N-Term]	FALSE		0.00196549	0	1	1	5	Q06481	Q06481 [470-488]	0	2224.14	0	0.296	-1.76	0.32666	9.01	0.296	0.01	0.501	-1.76	-6.64	-1	152.7	47.3	29.53	6.56	3	2	172.9	207.8	112	51.1		56.1	1	1	1	1		1	172.9	207.8	112	51.1
FALSE	High	[-].MDDREDLVYQAKLAEQA.[E]	1xAcetyl [N-Term]; 1xAcetyl:2H(3) [K12]	P62258 1xAcetyl [N-Term]; 1xAcetyl:2H(3) [K12]	FALSE		0.00302682	0	1	1	9	P62258	P62258 [1-17]	1	2081.99	0	1.486	0.57	0.975159	33.52	1.15	1.888	1.486	0.2	0.92	0.57	69.3	130.7	55.22	33.31	3	3	136.3	60.4	53.3	156.8	114	79.2	1	1	1	1	1	1	136.3	60.4	53.3	156.8	114
FALSE	High	[-].MDDREDLVYQAKLAEQAER.[Y]	1xAcetyl [N-Term]; 1xAcetyl:2H(3) [K12]	P62258 1xAcetyl [N-Term]; 1xAcetyl:2H(3) [K12]	FALSE		3.47885e-05	0	1	1	1374	P62258	P62258 [1-19]	1	2367.13	0	0.741	-0.43	0.967863	22.56	0.741	1.269	0.535	-0.43	0.34	-0.9	114.9	85.1	12.39	57.38	3	3	100.7	121.5	97	74.6	154.2	52	1	1	1	1	1	1	100.7	121.5	97	74.6	154.2
FALSE	High	[-].MDFQHRPGGKTGSGGVASSSESNR.[D]	1xAcetyl [N-Term]; 1xAcetyl:2H(3) [K10]	Q15428 1xAcetyl [N-Term]; 1xAcetyl:2H(3) [K10]	FALSE		0.000750602	0	1	1	2	Q15428	Q15428 [1-24]	0	2536.17	0	100	6.64	1.64805e-16	0		100	100		6.64	6.64		200		39.73		2					384.3	215.7					1	1					384.3
FALSE	High	[-].MDKNELVQKAKLAEQAER.[Y]	3xAcetyl:2H(3) [K3; K9; K11]	P63104 3xAcetyl:2H(3) [K3; K9; K11]	FALSE		3.81033e-05	0	1	1	8	P63104	P63104 [1-18]	0	2236.2	1	0.95	-0.07	0.992688	55.87		1.426	0.633		0.51	-0.66	102.5	97.5	92.78	117.54	2	2		217	45.1		309.5	28.5		1	1		1	1		217	45.1		309.5
FALSE	High	[-].MDKNELVQKAKLAEQAER.[Y]	1xAcetyl [N-Term]; 3xAcetyl:2H(3) [K3; K9; K11]	P63104 1xAcetyl [N-Term]; 3xAcetyl:2H(3) [K3; K9; K11]	FALSE		1.54742e-07	0	1	1	253	P63104	P63104 [1-18]	0	2278.21	0	1.061	0.08	0.972143	15.47	1.171	1.061	0.897	0.23	0.08	-0.16	93.4	106.6	10.14	16.2	3	3	91	109.3	93.4	106.6	115.9	83.8	1	1	1	1	1	1	91	109.3	93.4	106.6	115.9
FALSE	High	[T].MDKSELVQKAKLAEQAER.[Y]	3xAcetyl:2H(3) [K3; K9; K11]	P31946 3xAcetyl:2H(3) [K5; K11; K13]	FALSE		0.0039453	0	1	1	3	P31946	P31946 [3-20]	0	2209.18	0	1.128	0.17	0.990634	78.39		1.872	0.679		0.9	-0.56	94	106	75.83	113.49	2	2		177.6	53.6		332.4	36.4		1	1		1	1		177.6	53.6		332.4
FALSE	High	[T].MDKSELVQKAKLAEQAER.[Y]	1xAcetyl [N-Term]; 3xAcetyl:2H(3) [K3; K9; K11]	P31946 1xAcetyl [N-Term]; 3xAcetyl:2H(3) [K5; K11; K13]	FALSE		3.60219e-06	0	1	1	106	P31946	P31946 [3-20]	0	2251.19	0	0.814	-0.3	0.987505	0.28	1.084	0.811	0.814	0.12	-0.3	-0.3	100.8	99.2	14.28	11.14	3	3	93.5	122.6	101	101.3	99.4	82.2	1	1	1	1	1	1	93.5	122.6	101	101.3	99.4
FALSE	High	[T].MDKSELVQKAKLAEQAERYDDMAAAMKAVTEQGHELSNEER.[N]	1xAcetyl [N-Term]; 4xAcetyl:2H(3) [K3; K9; K11; K27]	P31946 1xAcetyl [N-Term]; 4xAcetyl:2H(3) [K5; K11; K13; K29]	FALSE		0.000224766	0	1	1	9	P31946	P31946 [3-43]	1	4872.35	0	100	6.64	1.64805e-16	0	100	0.243	100	6.64	-2.04	6.64	138.5	61.5		72.25	1	3		219.5		229.5	53.4	97.5		1		1	1	1		219.5		229.5	53.4
FALSE	High	[-].MDLAAAAEPGAGSQHLEVR.[D]	1xAcetyl [N-Term]	Q14566 1xAcetyl [N-Term]	FALSE		3.81033e-05	0	1	1	2	Q14566	Q14566 [1-19]	0	1964.95	0	1.485	0.57	0.988196	0	1.485			0.57			80.5	119.5			1	1	241.5			358.5			1			1			241.5			358.5
FALSE	High	[-].MDIRPNHTIYINNMNDKIKKEELKR.[S]	1xAcetyl [N-Term]; 4xAcetyl:2H(3) [K17; K19; K20; K24]	P08579 1xAcetyl [N-Term]; 4xAcetyl:2H(3) [K17; K19; K20; K24]	FALSE		7.77297e-05	0	1	1	1	P08579	P08579 [1-25]	0	3335.76	0	100	6.64	1.64805e-16	0	100			6.64				200				1				600						1						600
FALSE	High	[-].MDPSGVKVLETAEDIQER.[R]	1xAcetyl [N-Term]; 1xAcetyl:2H(3) [K7]	Q13813 1xAcetyl [N-Term]; 1xAcetyl:2H(3) [K7]	FALSE		0.000290885	0	1	1	3	Q13813	Q13813 [1-18]	0	2104.03	0	6.722	2.75	0.096476	121.51	1.213	100	6.722	0.28	6.64	2.75	62.3	137.7	118.68	42.03	2	3	169.4		14.8	205.5	110.6	99.6	1		1	1	1	1	169.4		14.8	205.5	110.6
FALSE	High	[-].MDPVVLSYMDSLLR.[Q]	1xAcetyl [N-Term]	Q96LD8 1xAcetyl [N-Term]	FALSE		0.0031916	0	1	1	3	Q96LD8	Q96LD8 [1-14]	0	1680.83	0
FALSE	High	[-].MEADIITNLR.[C]	1xAcetyl [N-Term]	Q96EA4 1xAcetyl [N-Term]	FALSE		0.00425556	0	1	1	2	Q96EA4	Q96EA4 [1-10]	0	1217.62	0	1.741	0.8	0.966538	62.98	1.741	100	1.001	0.8	6.64	0	115.1	84.9	107.11	123.84	2	3	182.3		25.2	317.4	49.9	25.2	1		1	1	1	1	182.3		25.2	317.4	49.9
FALSE	High	[-].MEAIAKYDFKATADDELSFKR.[G]	1xAcetyl [N-Term]; 3xAcetyl:2H(3) [K6; K10; K20]	P62993 1xAcetyl [N-Term]; 3xAcetyl:2H(3) [K6; K10; K20]	FALSE		0.000237021	0	1	1	65	P62993	P62993 [1-21]	0	2626.31	0	7.873	2.98	0.0499202	116.2	7.873	1.703	28.668	2.98	0.77	4.84	13.2	186.8	136.26	31.98	3	3	12.6	112.6	6.2	99.1	191.8	177.7	1	1	1	1	1	1	12.6	112.6	6.2	99.1	191.8
FALSE	High	[-].MEANGLGPQGFPELKNDTFLR.[A]	1xAcetyl [N-Term]; 1xAcetyl:2H(3) [K15]	P06132 1xAcetyl [N-Term]; 1xAcetyl:2H(3) [K15]	FALSE		9.90812e-05	0	1	1	27	P06132	P06132 [1-21]	0	2421.19	0	1.21	0.28	0.946401	4.36	0.958	1.246	1.21	-0.06	0.32	0.28	92.3	107.7	9.63	17.53	3	3	91.5	85.7	103.3	87.7	106.7	125.1	1	1	1	1	1	1	91.5	85.7	103.3	87.7	106.7
FALSE	High	[R].MEDETQKELETMR.[K]	1xAcetyl:2H(3) [K7]	P48739 1xAcetyl:2H(3) [K252]	FALSE		0.000122524	0	1	1	14	P48739	P48739 [246-258]	0	1684.76	0	2.321	1.21	0.698531	32.72	1.037	2.833	2.321	0.05	1.5	1.21	60.2	139.8	40.98	14.04	3	3	104.3	50	59	108.2	141.7	136.8	1	1	1	1	1	1	104.3	50	59	108.2	141.7
FALSE	High	[R].MEDETQKELETMR.[K]	1xOxidation [M]; 1xAcetyl:2H(3) [K7]	P48739 1xOxidation [M]; 1xAcetyl:2H(3) [K252]	FALSE		0.00230444	0	1	1	3	P48739	P48739 [246-258]	0	1700.75	0	0.078	-3.68	0.00219396	3.45	0.608		0.01	-0.72		-6.64	48.2	151.8	131.25		2	1	364.7		13.6	221.7			1		1	1			364.7		13.6	221.7
FALSE	High	[I].MEEKALEVYDLIR.[T]	1xAcetyl [N-Term]; 1xAcetyl:2H(3) [K4]	Q9H5X1 1xAcetyl [N-Term]; 1xAcetyl:2H(3) [K36]	FALSE		0.0038567	0	1	1	3	Q9H5X1	Q9H5X1 [33-45]	0	1695.87	0	6.099	2.61	0.434259	94.3	2.22	6.099	100	1.15	2.61	6.64	44.4	155.6	16.81	38.88	2	3	50.3	39.7		111.8	241.8	156.4	1	1		1	1	1	50.3	39.7		111.8	241.8
FALSE	High	[-].MEEIYAKFVSQKISKTR.[W]	1xAcetyl [N-Term]; 3xAcetyl:2H(3) [K7; K12; K15]	Q8NFH3 1xAcetyl [N-Term]; 3xAcetyl:2H(3) [K7; K12; K15]	FALSE		0.000444808	0	1	1	25	Q8NFH3	Q8NFH3 [1-17]	0	2235.2	0	1.294	0.37	0.962407	16.55	1.149	1.953	1.294	0.2	0.97	0.37	79	121	34.99	39.51	3	3	109.8	82.3	52.7	126.2	160.8	68.2	1	1	1	1	1	1	109.8	82.3	52.7	126.2	160.8
FALSE	High	[-].MEGVEEKKKEVPAVPETLKKKR.[R]	1xAcetyl [N-Term]; 6xAcetyl:2H(3) [K7; K8; K9; K19; K20; K21]	P18124 1xAcetyl [N-Term]; 6xAcetyl:2H(3) [K7; K8; K9; K19; K20; K21]	FALSE		3.40059e-05	0	1	1	21	P18124	P18124 [1-22]	0	2865.63	0	0.368	-1.44	0.23973	2.91	0.368	0.314	0.52	-1.44	-1.67	-0.94	146.2	53.8	60.6	39.15	3	3	117.5	246.3	76	43.2	77.4	39.5	1	1	1	1	1	1	117.5	246.3	76	43.2	77.4
FALSE	High	[-].MEKTELIQKAKLAEQAER.[Y]	1xAcetyl [N-Term]; 3xAcetyl:2H(3) [K3; K9; K11]	P27348 1xAcetyl [N-Term]; 3xAcetyl:2H(3) [K3; K9; K11]	FALSE		4.79066e-07	0	1	1	344	P27348	P27348 [1-18]	0	2293.24	0	1.176	0.23	0.939742	3.23	1.202	1.176	0.729	0.27	0.23	-0.46	90.8	109.2	7.79	31.18	3	3	97.7	105.3	90.1	117.4	123.8	65.7	1	1	1	1	1	1	97.7	105.3	90.1	117.4	123.8
FALSE	High	[P].MEINPEMLNKVLSR.[L]	1xAcetyl [N-Term]; 1xAcetyl:2H(3) [K10]	P09936 1xAcetyl [N-Term]; 1xAcetyl:2H(3) [K15]	FALSE		0.00452122	0	1	1	6	P09936	P09936 [6-19]	0	1760.91	0	1.067	0.09	0.99056	6.84	1.593	1.067	1.018	0.67	0.09	0.03	81	119	19.97	21.53	3	3	79.4	111.5	81	126.5	119.1	82.5	1	1	1	1	1	1	79.4	111.5	81	126.5	119.1
FALSE	High	[-].MEMKKKINLELR.[N]	1xAcetyl [N-Term]; 3xAcetyl:2H(3) [K4; K5; K6]	Q9BTT0 1xAcetyl [N-Term]; 3xAcetyl:2H(3) [K4; K5; K6]	FALSE		0.000986154	0	1	1	60	Q9BTT0	Q9BTT0 [1-12]	0	1709.96	0	1.961	0.97	0.432334	55.94	7.712	1.221	1.961	2.95	0.29	0.97	67.5	132.5	66.56	10.72	3	3	19.9	104.1	66	153.5	127.1	129.4	1	1	1	1	1	1	19.9	104.1	66	153.5	127.1
FALSE	High	[-].MEMKKKINLELR.[N]	1xAcetyl [N-Term]; 1xOxidation [M3]; 3xAcetyl:2H(3) [K4; K5; K6]	Q9BTT0 1xAcetyl [N-Term]; 1xOxidation [M3]; 3xAcetyl:2H(3) [K4; K5; K6]	FALSE		0.00374166	0	1	1	5	Q9BTT0	Q9BTT0 [1-12]	0	1725.96	0	1.295	0.37	0.969073	28.06	1.295	1.05	1.758	0.37	0.07	0.81	93	107	52.04	77.8	3	3	53.2	59.8	128.9	68.8	62.8	226.6	1	1	1	1	1	1	53.2	59.8	128.9	68.8	62.8
FALSE	High	[-].MEPAAGSSMEPSADWLATAAAR.[G]	1xAcetyl [N-Term]	P42771 1xAcetyl [N-Term]	FALSE		7.71424e-05	0	1	1	16	P42771	P42771 [1-22]	0	2262.02	0	1.527	0.61	0.92968	47.27	5.086	1.04	1.527	2.35	0.06	0.61	79.1	120.9	70.44	10.32	3	3	21.7	130.6	79.6	110.6	135.8	121.6	1	1	1	1	1	1	21.7	130.6	79.6	110.6	135.8
FALSE	High	[R].MEPDETVKVLKEKIEAEKGR.[D]	4xAcetyl:2H(3) [K8; K11; K13; K18]	P54725 4xAcetyl:2H(3) [K26; K29; K31; K36]	FALSE		0.000275845	0	1	1	2	P54725	P54725 [19-38]	0	2509.36	0	1.451	0.54	0.926965	24.65	0.756	1.451	1.692	-0.4	0.54	0.76	81.6	118.4	37.24	7.51	3	3	130.8	77.5	67	98.9	112.4	113.4	1	1	1	1	1	1	130.8	77.5	67	98.9	112.4
FALSE	High	[-].MEPKASCPAAAPLMER.[K]	1xAcetyl [N-Term]; 1xCarbamidomethyl [C7]; 1xAcetyl:2H(3) [K4]	Q96CD2 1xAcetyl [N-Term]; 1xCarbamidomethyl [C7]; 1xAcetyl:2H(3) [K4]	FALSE		0.00309637	0	1	1	6	Q96CD2	Q96CD2 [1-16]	0	1845.87	0	1.739	0.8	0.92452	17.28	1.739	1.942	1.256	0.8	0.96	0.33	73	127	52.92	66.52	3	3	76.5	108.1	32.1	133.1	210	40.3	1	1	1	1	1	1	76.5	108.1	32.1	133.1	210
FALSE	High	[-].MESYHKPDQQKLQALKDTANR.[L]	1xAcetyl [N-Term]; 3xAcetyl:2H(3) [K6; K11; K16]	P29401 1xAcetyl [N-Term]; 3xAcetyl:2H(3) [K6; K11; K16]	FALSE		2.18359e-06	0	1	1	19	P29401	P29401 [1-21]	0	2678.36	0	0.62	-0.69	0.901205	7.55	0.756	0.538	0.62	-0.4	-0.89	-0.69	116.6	83.4	27.7	14.01	3	3	100.8	162.7	106.6	76.2	87.6	66.1	1	1	1	1	1	1	100.8	162.7	106.6	76.2	87.6
FALSE	High	[S].IPLDPVAGYKEPACDDPDTEQAALAAVDYINKHLPR.[G]	1xCarbamidomethyl [C14]; 2xAcetyl:2H(3) [K10; K32]	P12763 1xCarbamidomethyl [C32]; 2xAcetyl:2H(3) [K28; K50]	TRUE	FBS	4.76914e-06	0	1	1	20	P12763	P12763 [19-54]	0	4053.02	0	0.978	-0.03	0.996649	81.07	1.537	0.354	0.978	0.62	-1.5	-0.03	101.1	98.9	41.99	34.86	3	3	78.3	164.4	90.4	120.3	58.2	88.4	1	1	1	1	1	1	78.3	164.4	90.4	120.3	58.2
FALSE	High	[R].IPKVQKLLQDFFNGR.[D]	2xAcetyl:2H(3) [K3; K6]; 1xAcetyl:2H(3) [N-Term]	P0DMV9 2xAcetyl:2H(3) [K345; K348]; 1xAcetyl:2H(3) [N-Term]	FALSE		0.000448194	0	1	1	17	P0DMV9	P0DMV9 [343-357]	0	1938.12	0	3.076	1.62	0.0664897	25.95	2.538	4.526	3.076	1.34	2.18	1.62	36.2	163.8	38.66	44.37	3	3	29.8	42	64.4	75.5	190.2	198	1	1	1	1	1	1	29.8	42	64.4	75.5	190.2
FALSE	High	[R].IPKVQKLLQDFFNGR.[D]	2xAcetyl:2H(3) [K3; K6]	P0DMV9 2xAcetyl:2H(3) [K345; K348]	FALSE		9.25436e-05	0	1	1	63	P0DMV9	P0DMV9 [343-357]	0	1893.09	0	1.824	0.87	0.528176	41.93	0.79	1.824	2.34	-0.34	0.87	1.23	70.8	129.2	42.39	18.14	3	3	122.2	64.6	59.5	96.5	117.9	139.2	1	1	1	1	1	1	122.2	64.6	59.5	96.5	117.9
FALSE	High	[E].LFADKVPKTAENFR.[A]	2xAcetyl:2H(3) [K5; K8]	P62937 2xAcetyl:2H(3) [K28; K31]	FALSE		0.000664846	0	1	1	2	P62937	P62937 [24-37]	0	1725.94	0	1.31	0.39	0.998323	3.59	100	1.31	1.278	6.64	0.39	0.35	94.8	105.2	19.78	77.61	2	3		144.9	109.4	16.1	189.8	139.8		1	1	1	1	1		144.9	109.4	16.1	189.8
FALSE	High	[R].LFSLKPTSGPVLTVTLFGR.[L]	1xAcetyl:2H(3) [K5]	O95497 1xAcetyl:2H(3) [K464]	TRUE	FBS	0.00311991	0	1	2	1	O95497	O95497 [460-478]	0	2078.21	0	0.22	-2.19	0.139287	0.73		0.199	0.243		-2.33	-2.04	164	36	80.77	70.57	2	2		390.1	106.5		77.5	25.9		1	1		1	1		390.1	106.5		77.5
FALSE	High	[R].IFYPEIEEVQALDDTER.[G]			FALSE		1.29787e-05	0	1	1	17	P33316	P33316 [225-241]	0	2066.99	0	1.705	0.77	0.891085	60.46	2.401	1.705	0.529	1.26	0.77	-0.92	73.9	126.1	7.67	66.5	3	3	83.8	75.6	72.3	201.2	129	38.2	1	1	1	1	1	1	83.8	75.6	72.3	201.2	129
FALSE	High	[R].IFYPEIEEVQALDDTER.[G]	1xAcetyl:2H(3) [N-Term]	P33316 1xAcetyl:2H(3) [N-Term]	FALSE		0.000348958	0	1	1	12	P33316	P33316 [225-241]	0	2112.02	0	4.275	2.1	0.616766	91.58	4.275	10.245	1.634	2.1	3.36	0.71	75.9	124.1	75.37	83.83	3	3	71.7	7.2	53.2	306.7	74.2	86.9	1	1	1	1	1	1	71.7	7.2	53.2	306.7	74.2
FALSE	High	[R].LGAAPEEESAYVAGEKR.[Q]	1xAcetyl:2H(3) [K16]	Q9UNZ2 1xAcetyl:2H(3) [K172]	FALSE		0.000140446	0	1	1	7	Q9UNZ2	Q9UNZ2 [157-173]	0	1821.91	0	3.65	1.87	0.518243	19.5	0.86	4.131	3.65	-0.22	2.05	1.87	55.4	144.6	70	33.95	3	3	116.6	45.3	32.4	100.3	187.2	118.2	1	1	1	1	1	1	116.6	45.3	32.4	100.3	187.2
FALSE	High	[R].IGADEEIDDFKGR.[S]	1xAcetyl:2H(3) [K11]	Q8WUA2 1xAcetyl:2H(3) [K201]	FALSE		0.00357549	0	1	1	6	Q8WUA2	Q8WUA2 [191-203]	0	1509.73	0	2.443	1.29	0.750722	5.36	1.029	2.443	2.531	0.04	1.29	1.34	72	128	47.46	23.92	3	3	110.7	43.3	64.1	113.9	105.9	162.1	1	1	1	1	1	1	110.7	43.3	64.1	113.9	105.9
FALSE	High	[K].IGEHTPSALAIMENANVLAR.[Y]			FALSE		0.00258174	0	1	1	3	P04075	P04075 [154-173]	0	2107.1	0	0.626	-0.68	0.84071	57.18	0.01	0.626	1.746	-6.64	-0.68	0.8	87.9	112.1	60.02	86.51	3	2	35.1	98.9	147.2		61.9	257	1	1	1		1	1	35.1	98.9	147.2		61.9
FALSE	High	[K].LGEYGFQNALIVR.[Y]			TRUE	FBS	0.000779604	0	1	1	3	P02769	P02769 [421-433]	0	1479.8	0	0.991	-0.01	0.995695	104.66	1.703	0.212	0.991	0.77	-2.24	-0.01	140.5	59.5	96.9	94.73	3	3	5	265.7	132.8	8.6	56.3	131.6	1	1	1	1	1	1	5	265.7	132.8	8.6	56.3
FALSE	High	[R].LGFSEVELVQMVVDGVKLLIEMEQR.[L]	1xAcetyl:2H(3) [K17]	P12277 1xAcetyl:2H(3) [K358]	FALSE		0.000767871	0	1	1	1	P12277	P12277 [342-366]	0	2906.54	0
FALSE	High	[R].IGGNEGIDVPIPR.[F]			FALSE		0.000841011	0	1	1	8	Q96AE4	Q96AE4 [272-284]	0	1336.72	0	2.313	1.21	0.535535	77.72	2.313	1.101	4.521	1.21	0.14	2.18	47.4	152.6	39.78	70.17	3	3	73.3	31.5	52.7	169.6	34.7	238.1	1	1	1	1	1	1	73.3	31.5	52.7	169.6	34.7
FALSE	High	[R].LGGPEAGLGEYLFER.[L]	1xAcetyl:2H(3) [N-Term]	P02792 1xAcetyl:2H(3) [N-Term]	FALSE		0.00321586	0	1	1	3	P02792	P02792 [155-169]	0	1652.84	0	0.387	-1.37	0.408149	1.26	0.387	0.365	0.471	-1.37	-1.45	-1.09	144.1	55.9	31.43	36.28	3	3	90.7	172.4	162.4	35.1	62.9	76.5	1	1	1	1	1	1	90.7	172.4	162.4	35.1	62.9
FALSE	High	[R].LGHAEQKDEMVPR.[L]	1xAcetyl:2H(3) [K7]	Q9P258 1xAcetyl:2H(3) [K368]	FALSE		0.00282738	0	1	1	22	Q9P258	Q9P258 [362-374]	0	1554.78	0	2.529	1.34	0.235729	98.87	0.827	4.215	2.529	-0.27	2.08	1.34	56.7	143.3	55.82	27.87	3	3	111.6	39.1	54.5	92.2	164.8	137.8	1	1	1	1	1	1	111.6	39.1	54.5	92.2	164.8
FALSE	High	[R].LGHAEQKDEMVPR.[L]	1xAcetyl:2H(3) [K7]; 1xAcetyl:2H(3) [N-Term]	Q9P258 1xAcetyl:2H(3) [K368]; 1xAcetyl:2H(3) [N-Term]	FALSE		0.000444808	0	1	1	12	Q9P258	Q9P258 [362-374]	0	1599.81	0	1.51	0.59	0.957772	95.43	0.538	1.51	4.165	-0.89	0.59	2.06	79.7	120.3	43.96	47.2	3	3	109.3	87.6	41	58.8	132.3	170.9	1	1	1	1	1	1	109.3	87.6	41	58.8	132.3
FALSE	High	[R].LGLGEGAEEKSIPTLISR.[L]	1xAcetyl:2H(3) [K10]	P18754 1xAcetyl:2H(3) [K335]	FALSE		0.000273761	0	1	1	7	P18754	P18754 [326-343]	0	1915.06	0	0.83	-0.27	0.968601	17.87	0.83	2.91	0.685	-0.27	1.54	-0.55	59.4	140.6	72.16	53.85	3	3	169.1	48.7	59.4	140.5	141.7	40.7	1	1	1	1	1	1	169.1	48.7	59.4	140.5	141.7
FALSE	High	[R].IGNAKGDDALEKR.[F]	2xAcetyl:2H(3) [K5; K12]	Q9Y617 2xAcetyl:2H(3) [K311; K318]	FALSE		0.000873504	0	1	1	27	Q9Y617	Q9Y617 [307-319]	0	1476.79	0	0.672	-0.57	0.93455	2.05	0.672	0.651	1.302	-0.57	-0.62	0.38	115.7	84.3	26.74	11.49	3	3	132.5	122.1	76.9	89	79.5	100.1	1	1	1	1	1	1	132.5	122.1	76.9	89	79.5
FALSE	High	[R].LGQSDPAPLQHQMDIYQKR.[C]	1xAcetyl:2H(3) [K18]; 1xAcetyl:2H(3) [N-Term]	P29401 1xAcetyl:2H(3) [K204]; 1xAcetyl:2H(3) [N-Term]	FALSE		0.00357549	0	1	1	8	P29401	P29401 [187-205]	0	2315.17	0	0.655	-0.61	0.860309	3.86	0.615	0.655	1.04	-0.7	-0.61	0.06	120.8	79.2	10.7	39.87	3	3	99	114.8	122.6	60.9	75.2	127.5	1	1	1	1	1	1	99	114.8	122.6	60.9	75.2
FALSE	High	[A].LGRPSEEDEELVVPELER.[A]	1xAcetyl:2H(3) [N-Term]	Q9UHI8 1xAcetyl:2H(3) [N-Term]	FALSE		3.41594e-06	0	1	1	63	Q9UHI8	Q9UHI8 [50-67]	0	2141.08	0	0.753	-0.41	0.972143	0.32	0.756	0.753	0.492	-0.4	-0.41	-1.02	114.2	85.8	24.94	40.84	3	3	153.4	101.9	102	115.9	76.7	50.2	1	1	1	1	1	1	153.4	101.9	102	115.9	76.7
FALSE	High	[R].LHAFDQQLDLELRPDSSFLAPGFTLQNVGR.[K]			FALSE		4.85699e-05	0	1	1	23	Q9UHI8	Q9UHI8 [78-107]	0	3384.73	0	1.417	0.5	0.940297	38.85	13.77	1.045	1.417	3.78	0.06	0.5	82.8	117.2	115.01	69.29	3	3	4.1	195.5	57.9	56.2	204.3	82	1	1	1	1	1	1	4.1	195.5	57.9	56.2	204.3
FALSE	High	[R].IHDGEADIMINFGR.[W]			FALSE		0.000290885	0	1	1	9	P08253	P08253 [162-175]	0	1587.76	0	9.917	3.31	0.000607189	16.33	9.917	14.461	8.824	3.31	3.85	3.14	19.5	180.5	62.09	53.65	3	3	29.8	8.9	13.9	295.4	129	122.9	1	1	1	1	1	1	29.8	8.9	13.9	295.4	129
FALSE	High	[H].IHEECCKGNVLECLQDGER.[V]	3xCarbamidomethyl [C5; C6; C13]; 1xAcetyl:2H(3) [K7]	Q3SZ57 3xCarbamidomethyl [C269; C270; C277]; 1xAcetyl:2H(3) [K271]	TRUE	FBS	3.27405e-05	0	1	1	2	Q3SZ57	Q3SZ57 [265-283]	0	2391.06	0	1.308	0.39	0.983348	52.69	100	1.308	0.843	6.64	0.39	-0.25	114	86	70.86	72.6	2	3		72.1	217.1	33.4	94.4	183		1	1	1	1	1		72.1	217.1	33.4	94.4
FALSE	High	[R].LHFFMPGFAPLTSR.[G]			TRUE	FBS	0.00137655	0	1	9	13	P68371	P68371 [263-276]	0	1620.84	0	0.383	-1.38	0.501254	6.82	0.264	8.753	0.383	-1.92	3.13	-1.38	84.4	115.6	118.62	91.83	3	3	261.6	20.5	50.3	68.9	179.3	19.3	1	1	1	1	1	1	261.6	20.5	50.3	68.9	179.3
FALSE	High	[R].LHKPPKVQEKCQLEINFNTLQTKLR.[L]	1xCarbamidomethyl [C11]; 4xAcetyl:2H(3) [K3; K6; K10; K23]	P12814 1xCarbamidomethyl [C332]; 4xAcetyl:2H(3) [K324; K327; K331; K344]	FALSE		0.000197576	0	1	1	6	P12814	P12814 [322-346]	0	3242.81	0	1.845	0.88	0.956803	114.76	0.417	100	1.845	-1.26	6.64	0.88	107.4	92.6	87.83	26.31	2	3	256.6		60	106.9	65.9	110.6	1		1	1	1	1	256.6		60	106.9	65.9
FALSE	High	[H].LHIKEKGKPLMLNPR.[T]	3xAcetyl:2H(3) [K4; K6; K8]; 1xAcetyl:2H(3) [N-Term]	P23368 3xAcetyl:2H(3) [K22; K24; K26]; 1xAcetyl:2H(3) [N-Term]	FALSE		0.000169768	0	1	1	2	P23368	P23368 [19-33]	0	1954.17	0	0.844	-0.24	0.979216	46.15	0.01	1.213	0.844	-6.64	0.28	-0.24	87.4	112.6	82.55	8.53	3	2	13.5	112.7	182.8		136.7	154.3	1	1	1		1	1	13.5	112.7	182.8		136.7
FALSE	High	[R].IHIMPSLNPDGFEKAASQPGELKDWFVGR.[S]	2xAcetyl:2H(3) [K14; K23]	P16870 2xAcetyl:2H(3) [K164; K173]	FALSE		9.65541e-06	0	1	1	11	P16870	P16870 [151-179]	0	3329.69	0	100	6.64	1.64805e-16	0	0.786	100	100	-0.35	6.64	6.64	130.5	69.5		30.07	1	3	217.1			170.6	96.7	115.6	1			1	1	1	217.1			170.6	96.7
FALSE	High	[R].IHPFHILIALETYKTGHGLR.[G]	1xAcetyl:2H(3) [K14]	P10155 1xAcetyl:2H(3) [K332]	FALSE		0.000168486	0	1	1	1	P10155	P10155 [319-338]	0	2361.33	0	0.085	-3.56	0.00730402	4.49		0.722	0.01		-0.47	-6.64	93.6	106.4	60.11		2	1		282.2	113.9		203.9			1	1		1			282.2	113.9		203.9
FALSE	High	[R].IHQIEYAMEAVKQGSATVGLKSKTHAVLVALKR.[A]	4xAcetyl:2H(3) [K12; K21; K23; K32]	P25786 4xAcetyl:2H(3) [K30; K39; K41; K50]	FALSE		6.39091e-07	0	1	1	45	P25786	P25786 [19-51]	0	3757.12	0	4.667	2.22	0.258873	122.07	9.422	0.824	4.667	3.24	-0.28	2.22	35.3	164.7	161.96	112.98	3	3	2.4	282.7	10.4	22.7	233	48.8	1	1	1	1	1	1	2.4	282.7	10.4	22.7	233
FALSE	High	[R].IHQIEYAMEAVKQGSATVGLKSKTHAVLVALKR.[A]	1xOxidation [M8]; 4xAcetyl:2H(3) [K12; K21; K23; K32]	P25786 1xOxidation [M26]; 4xAcetyl:2H(3) [K30; K39; K41; K50]	FALSE		0.00382762	0	1	1	1	P25786	P25786 [19-51]	0	3773.12	0
FALSE	High	[R].IHQIEYAMEAVKQGSATVGLKSKTHAVLVALKR.[A]	4xAcetyl:2H(3) [K12; K21; K23; K32]; 1xAcetyl:2H(3) [N-Term]	P25786 4xAcetyl:2H(3) [K30; K39; K41; K50]; 1xAcetyl:2H(3) [N-Term]	FALSE		0.0019955	0	1	1	8	P25786	P25786 [19-51]	0	3802.15	0	0.126	-2.99	0.0166007	14.62		1.579	0.01		0.66	-6.64	23.8	176.2	129.16		2	1		228.6	10.4		361			1	1		1			228.6	10.4		361
FALSE	High	[S].LHTDGDKAFVDFLSDEIKEER.[K]	2xAcetyl:2H(3) [K7; K18]	Q07021 2xAcetyl:2H(3) [K80; K91]	FALSE		3.10476e-05	0	1	1	19	Q07021	Q07021 [74-94]	0	2554.26	0	0.619	-0.69	0.860309	17.21	1.049	0.619	0.431	0.07	-0.69	-1.21	139.8	60.2	47.39	32.21	3	3	57.3	168.1	147.1	60.1	104	63.4	1	1	1	1	1	1	57.3	168.1	147.1	60.1	104
FALSE	High	[A].LEVPTDGNAGLLAEPQIAMFCGR.[L]	1xCarbamidomethyl [C21]; 1xOxidation [M19]; 1xAcetyl:2H(3) [N-Term]	P05067 1xCarbamidomethyl [C38]; 1xOxidation [M36]; 1xAcetyl:2H(3) [N-Term]	FALSE		0.00184989	0	1	1	6	P05067	P05067 [18-40]	0	2520.23	0	0.618	-0.69	0.904506	35.36	0.232	0.618	1.303	-2.11	-0.69	0.38	86.8	113.2	111.7	46.45	3	3	323.5	44	56.5	75.1	27.2	73.7	1	1	1	1	1	1	323.5	44	56.5	75.1	27.2
FALSE	High	[S].LHTDGDKAFVDFLSDEIKEER.[K]	2xAcetyl:2H(3) [K7; K18]; 1xAcetyl:2H(3) [N-Term]	Q07021 2xAcetyl:2H(3) [K80; K91]; 1xAcetyl:2H(3) [N-Term]	FALSE		1.38528e-06	0	1	1	168	Q07021	Q07021 [74-94]	0	2599.29	0	0.649	-0.62	0.920402	13.95	0.91	0.504	0.649	-0.14	-0.99	-0.62	119.1	80.9	70.38	43.59	3	3	63.5	224.9	85.1	57.8	113.5	55.3	1	1	1	1	1	1	63.5	224.9	85.1	57.8	113.5
FALSE	High	[A].LEVPTDGNAGLLAEPQIAMFCGR.[L]	1xCarbamidomethyl [C21]; 1xAcetyl:2H(3) [N-Term]	P05067 1xCarbamidomethyl [C38]; 1xAcetyl:2H(3) [N-Term]	FALSE		5.52539e-05	0	1	1	23	P05067	P05067 [18-40]	0	2504.24	0	0.777	-0.36	0.976058	27.28	0.385	0.777	1.014	-1.38	-0.36	0.02	106.6	93.4	53.02	11.38	3	3	199	87.3	84.1	76.6	67.8	85.2	1	1	1	1	1	1	199	87.3	84.1	76.6	67.8
FALSE	High	[R].IEVAKLDGTQR.[R]	1xAcetyl:2H(3) [K5]	P14543 1xAcetyl:2H(3) [K1049]	FALSE		0.00462505	0	1	1	22	P14543	P14543 [1045-1055]	0	1274.71	0	0.756	-0.4	0.972143	46.55	0.34	0.756	3.947	-1.56	-0.4	1.98	113.9	86.1	45.01	92.36	3	3	134.9	76	57.8	45.9	57.4	228.1	1	1	1	1	1	1	134.9	76	57.8	45.9	57.4
FALSE	High	[R].LDQPMTEIVSR.[V]			FALSE		0.00291435	0	1	1	10	P22314	P22314 [1011-1021]	0	1288.66	0	3.508	1.81	0.0295453	135.68	0.298	100	3.508	-1.75	6.64	1.81	60.7	139.3	35.89	68.94	2	3	104.3		62.1	31.1	184.8	217.8	1		1	1	1	1	104.3		62.1	31.1	184.8
FALSE	High	[K].IDTIEIITDR.[Q]			FALSE		0.00438638	0	1	1	6	P22626	P22626 [138-147]	0	1188.65	0	1.013	0.02	0.999983	29.35	1.013	100	0.813	0.02	6.64	-0.3	103.8	96.2	18.53	53.2	2	3	88.4		115.1	89.6	213.3	93.5	1		1	1	1	1	88.4		115.1	89.6	213.3
FALSE	High	[R].LDYFLLSHSLLPALCDSKIR.[S]	1xCarbamidomethyl [C15]; 1xAcetyl:2H(3) [K18]	P27695 1xCarbamidomethyl [C296]; 1xAcetyl:2H(3) [K299]	FALSE		0.000335973	0	1	1	10	P27695	P27695 [282-301]	0	2406.29	0	0.546	-0.87	0.860309	1.59	0.526	0.546	0.617	-0.93	-0.87	-0.7	131	69	57.98	55.12	3	3	103.1	212.8	70.3	54.3	116.2	43.3	1	1	1	1	1	1	103.1	212.8	70.3	54.3	116.2
FALSE	High	[R].LEAAYLDLQR.[I]			FALSE		0.00160184	0	1	1	12	O75347	O75347 [71-80]	0	1191.64	0	1.176	0.23	0.99284	17.35	1.677	1.038	1.176	0.75	0.05	0.23	95.9	104.1	43.42	26.55	3	3	45.4	116.2	111	76.2	120.6	130.6	1	1	1	1	1	1	45.4	116.2	111	76.2	120.6
FALSE	High	[R].LEAAYLDLQR.[I]	1xAcetyl:2H(3) [N-Term]	O75347 1xAcetyl:2H(3) [N-Term]	FALSE		0.00302682	0	1	1	13	O75347	O75347 [71-80]	0	1236.67	0	1.797	0.85	0.860309	5.79	1.797	1.868	1.185	0.85	0.9	0.24	69.7	130.3	49.72	24.97	3	3	49.2	66	125	88.5	123.2	148.1	1	1	1	1	1	1	49.2	66	125	88.5	123.2
FALSE	High	[R].LEALKEGGGSLAEYHAKASEQLKALGEKAKPVLEDLR.[Q]	5xAcetyl:2H(3) [K5; K17; K23; K28; K30]	P15497 5xAcetyl:2H(3) [K205; K217; K223; K228; K230]	TRUE	FBS	0.00141892	0	1	1	7	P15497	P15497 [201-237]	0	4174.29	0	100	6.64	1.64805e-16	0	100	1.204	100	6.64	0.27	6.64	90.8	109.2		78.94	1	3		110.1		304.8	132.6	52.5		1		1	1	1		110.1		304.8	132.6
FALSE	High	[R].IEDSFSVKEQLQDMGLEDLFSPEKSR.[L]	2xAcetyl:2H(3) [K8; K24]	F1MSZ6 2xAcetyl:2H(3) [K365; K381]	TRUE	FBS	9.32482e-05	0	1	1	54	F1MSZ6	F1MSZ6 [358-383]	0	3117.52	0	0.829	-0.27	0.99056	12.44	0.93	0.717	0.829	-0.1	-0.48	-0.27	116.5	83.5	16.26	22.43	3	3	121.6	117.9	89.1	113.1	84.5	73.8	1	1	1	1	1	1	121.6	117.9	89.1	113.1	84.5
FALSE	High	[R].IEDSFSVKEQLQDMGLEDLFSPEKSR.[L]	1xOxidation [M14]; 2xAcetyl:2H(3) [K8; K24]	F1MSZ6 1xOxidation [M371]; 2xAcetyl:2H(3) [K365; K381]	TRUE	FBS	0.000971315	0	1	1	15	F1MSZ6	F1MSZ6 [358-383]	0	3133.52	0	0.621	-0.69	0.870739	21.83	0.212	0.621	0.858	-2.24	-0.69	-0.22	134.1	65.9	58.99	35.28	3	3	231	80.7	101.9	48.9	50.1	87.4	1	1	1	1	1	1	231	80.7	101.9	48.9	50.1
FALSE	High	[R].IEDSFSVKEQLQDMGLEDLFSPEKSR.[L]	2xAcetyl:2H(3) [K8; K24]; 1xAcetyl:2H(3) [N-Term]	F1MSZ6 2xAcetyl:2H(3) [K365; K381]; 1xAcetyl:2H(3) [N-Term]	TRUE	FBS	0.00252373	0	1	1	17	F1MSZ6	F1MSZ6 [358-383]	0	3162.55	0	0.548	-0.87	0.693684	6.17	0.548	0.472	0.643	-0.87	-1.08	-0.64	133.1	66.9	25.71	23.68	3	3	164.2	125.4	98.1	90	59.2	63.1	1	1	1	1	1	1	164.2	125.4	98.1	90	59.2
FALSE	High	[R].IEEDVVVTDSGIELLTCVPR.[T]	1xCarbamidomethyl [C17]	P12955 1xCarbamidomethyl [C467]	FALSE		3.7699e-06	0	1	1	23	P12955	P12955 [451-470]	0	2244.14	0	0.746	-0.42	0.939152	19.7	0.557	0.924	0.746	-0.84	-0.11	-0.42	121.5	78.5	8.77	28.42	3	3	119.1	121.9	103.2	66.3	112.6	77	1	1	1	1	1	1	119.1	121.9	103.2	66.3	112.6
FALSE	High	[R].IEEELGSKAKFAGR.[N]	2xAcetyl:2H(3) [K8; K10]	P06733 2xAcetyl:2H(3) [K420; K422]	FALSE		8.1968e-05	0	1	1	820	P06733	P06733 [413-426]	0	1624.88	0	0.736	-0.44	0.966146	3.76	0.736	0.774	0.701	-0.44	-0.37	-0.51	112.8	87.2	26.64	22.46	3	3	93.7	102.1	150.7	68.9	79	105.7	1	1	1	1	1	1	93.7	102.1	150.7	68.9	79
FALSE	High	[R].LEELELSGNR.[L]			FALSE		0.00304983	0	1	1	10	Q9NT99	Q9NT99 [231-240]	0	1159.6	0	1.392	0.48	0.97316	81.79	0.624	1.392	3.792	-0.68	0.48	1.92	67.4	132.6	33.78	59.79	3	3	71.2	100.7	50.8	44.4	140.1	192.7	1	1	1	1	1	1	71.2	100.7	50.8	44.4	140.1
FALSE	High	[R].IEEVTKKGNEAVASR.[D]	2xAcetyl:2H(3) [K6; K7]	Q8NBJ4 2xAcetyl:2H(3) [K179; K180]	FALSE		7.20524e-05	0	1	1	24	Q8NBJ4	Q8NBJ4 [174-188]	0	1720.93	0	0.845	-0.24	0.99381	52.14	0.336	0.845	1.261	-1.57	-0.24	0.33	108.4	91.6	16.75	44.14	3	3	129.5	118.2	92.4	43.6	99.8	116.6	1	1	1	1	1	1	129.5	118.2	92.4	43.6	99.8
FALSE	High	[R].LEGEACGVYTPR.[C]	1xCarbamidomethyl [C6]	P18065 1xCarbamidomethyl [C98]	FALSE		0.00117399	0	1	1	20	P18065	P18065 [93-104]	0	1351.63	0	1.212	0.28	0.97316	11.46	1.119	1.212	5.021	0.16	0.28	2.33	81.5	118.5	68.48	20	3	3	131.3	81.4	23.6	146.9	98.6	118.3	1	1	1	1	1	1	131.3	81.4	23.6	146.9	98.6
FALSE	High	[R].LEGEDQFLEVAEAPEATQATFPVHR.[A]			TRUE	FBS	4.64091e-05	0	1	1	11	Q2KJF1	Q2KJF1 [155-179]	0	2784.35	0	0.818	-0.29	0.988196	32.87	2.212	0.818	0.547	1.15	-0.29	-0.87	109.6	90.4	34.4	70.41	3	3	86.3	66.8	130.2	190.9	54.6	71.2	1	1	1	1	1	1	86.3	66.8	130.2	190.9	54.6
FALSE	High	[R].LEGENTQDKNKKLRPLYDIPYMFEAR.[E]	3xAcetyl:2H(3) [K9; K11; K12]	Q7KZF4 3xAcetyl:2H(3) [K386; K388; K389]	FALSE		8.32208e-05	0	1	1	4	Q7KZF4	Q7KZF4 [378-403]	0	3303.7	0	1.36	0.44	0.976445	140.21	0.074	1.36	100	-3.76	0.44	6.64	66.2	133.8	53.34	98.29	2	3	48.5	107.3		3.6	145.9	294.6	1	1		1	1	1	48.5	107.3		3.6	145.9
FALSE	High	[R].IEKAMKEYEEEER.[K]	2xAcetyl:2H(3) [K3; K6]	Q16543 2xAcetyl:2H(3) [K273; K276]	FALSE		0.000767871	0	1	1	14	Q16543	Q16543 [271-283]	0	1773.85	0	3.064	1.62	0.250418	49.24	2.047	3.064	13.802	1.03	1.62	3.79	65.6	134.4	68.91	25.9	3	3	64.1	65.2	9.4	131.1	199.8	130.4	1	1	1	1	1	1	64.1	65.2	9.4	131.1	199.8
FALSE	High	[R].LEKEEAKQIQNLQKAGTR.[T]	3xAcetyl:2H(3) [K3; K7; K14]	P10644 3xAcetyl:2H(3) [K59; K63; K70]	FALSE		0.000302128	0	1	1	8	P10644	P10644 [57-74]	0	2219.23	0	1.573	0.65	0.972143	28.56	100	1.27	1.573	6.64	0.35	0.65	92.5	107.5	12.65	43.68	2	3		98.4	117.7	73.6	125	185.3		1	1	1	1	1		98.4	117.7	73.6	125
FALSE	High	[R].LEKELENANDLLSATKR.[K]	2xAcetyl:2H(3) [K3; K16]	P12270 2xAcetyl:2H(3) [K351; K364]	FALSE		1.16713e-05	0	1	1	5	P12270	P12270 [349-365]	0	2034.1	0	100	6.64	1.64805e-16	0	0.797	100	100	-0.33	6.64	6.64	111.3	88.7		72.18	1	3	156.4			124.7	54.6	264.3	1			1	1	1	156.4			124.7	54.6
FALSE	High	[L].LEKKKVAQDQLR.[D]	3xAcetyl:2H(3) [K3; K4; K5]; 1xAcetyl:2H(3) [N-Term]	P33908 3xAcetyl:2H(3) [K154; K155; K156]; 1xAcetyl:2H(3) [N-Term]	FALSE		0.0023934	0	1	1	2	P33908	P33908 [152-163]	0	1635.98	0	0.074	-3.76	0.00138263	2.93	0.545		0.01	-0.87		-6.64	79.5	120.5	108.95		2	1	358.2		46.5	195.4			1		1	1			358.2		46.5	195.4
FALSE	High	[R].LEKTKVERFPDLAAEKECR.[D]	1xCarbamidomethyl [C18]; 3xAcetyl:2H(3) [K3; K5; K16]	Q86WR0 1xCarbamidomethyl [C150]; 3xAcetyl:2H(3) [K135; K137; K148]	FALSE		0.00068532	0	1	1	1	Q86WR0	Q86WR0 [133-151]	1	2454.3	0	2.696	1.43	0.798865	0	2.696			1.43			54.1	145.9			1	1	162.4			437.6			1			1			162.4			437.6
FALSE	High	[R].IEIESFYEGEDFSETLTR.[A]			FALSE		5.56745e-05	0	1	1	15	P11021	P11021 [307-324]	0	2164.99	0	1.042	0.06	0.999636	71.54	0.265	1.545	1.042	-1.92	0.63	0.06	97.9	102.1	63.51	34.22	3	3	204.5	71.4	78.2	54.2	110.3	81.4	1	1	1	1	1	1	204.5	71.4	78.2	54.2	110.3
FALSE	High	[R].IELGDVTPHNIKQLKR.[L]	2xAcetyl:2H(3) [K12; K15]	Q9GZZ1 2xAcetyl:2H(3) [K17; K20]	FALSE		0.0029365	0	1	1	2	Q9GZZ1	Q9GZZ1 [6-21]	0	1951.12	0	6.214	2.64	0.0952185	11.45	6.214	6.694	1.633	2.64	2.74	0.71	50.9	149.1	51.56	85.67	3	3	52.4	16.2	37	325.4	108.5	60.4	1	1	1	1	1	1	52.4	16.2	37	325.4	108.5
FALSE	High	[S].LELSRPHGDTAKKPIIGILMQKCR.[N]	1xCarbamidomethyl [C23]; 3xAcetyl:2H(3) [K12; K13; K22]	Q92820 1xCarbamidomethyl [C43]; 3xAcetyl:2H(3) [K32; K33; K42]	FALSE		0.00333995	0	1	1	11	Q92820	Q92820 [21-44]	0	2896.62	0	0.321	-1.64	0.248261	1.15	0.595	0.321	0.297	-0.75	-1.64	-1.75	154.2	45.8	68.92	54.93	3	3	30.8	212.4	208.4	18.3	68.2	61.9	1	1	1	1	1	1	30.8	212.4	208.4	18.3	68.2
FALSE	High	[S].LELSRPHGDTAKKPIIGILMQKCR.[N]	1xCarbamidomethyl [C23]; 3xAcetyl:2H(3) [K12; K13; K22]; 1xAcetyl:2H(3) [N-Term]	Q92820 1xCarbamidomethyl [C43]; 3xAcetyl:2H(3) [K32; K33; K42]; 1xAcetyl:2H(3) [N-Term]	FALSE		2.31304e-07	0	1	1	272	Q92820	Q92820 [21-44]	0	2941.65	0	0.629	-0.67	0.908591	20.49	0.629	0.375	0.849	-0.67	-1.41	-0.24	126.5	73.5	26.73	17.02	3	3	132.3	157.8	90.6	83.2	59.2	76.9	1	1	1	1	1	1	132.3	157.8	90.6	83.2	59.2
FALSE	High	[S].LELSRPHGDTAKKPIIGILMQKCR.[N]	1xCarbamidomethyl [C23]; 1xOxidation [M20]; 3xAcetyl:2H(3) [K12; K13; K22]; 1xAcetyl:2H(3) [N-Term]	Q92820 1xCarbamidomethyl [C43]; 1xOxidation [M40]; 3xAcetyl:2H(3) [K32; K33; K42]; 1xAcetyl:2H(3) [N-Term]	FALSE		1.26088e-07	0	1	1	249	Q92820	Q92820 [21-44]	0	2957.65	0	0.402	-1.31	0.408337	6.97	0.127	0.402	0.519	-2.98	-1.31	-0.95	145.2	54.8	70.77	19.32	3	3	288.5	90.8	97.1	36.7	36.5	50.4	1	1	1	1	1	1	288.5	90.8	97.1	36.7	36.5
FALSE	High	[R].LENNENKPVTNSR.[D]	1xAcetyl:2H(3) [K7]	Q9Y5A9 1xAcetyl:2H(3) [K521]	FALSE		0.00145155	0	1	1	2	Q9Y5A9	Q9Y5A9 [515-527]	0	1559.79	0	3.287	1.72	0.837414	24.98	2.733	100	3.287	1.45	6.64	1.72	54.5	145.5	29.07	13.87	2	3	68.8		45.3	187.9	149.1	148.9	1		1	1	1	1	68.8		45.3	187.9	149.1
FALSE	High	[R].LEQGQAIDDLMPAQK.[-]	1xOxidation [M11]; 1xAcetyl:2H(3) [K15]	P12277 1xOxidation [M377]; 1xAcetyl:2H(3) [K381]	FALSE		0.0023934	0	1	1	55	P12277	P12277 [367-381]	0	1717.85	0	0.648	-0.63	0.917515	31.87	0.235	0.98	0.648	-2.09	-0.03	-0.63	115.1	84.9	30.01	55.14	3	3	120.3	90.5	165.2	28.3	88.7	107	1	1	1	1	1	1	120.3	90.5	165.2	28.3	88.7
FALSE	High	[R].IESVLSSSGKR.[L]	1xAcetyl:2H(3) [K10]	P17900 1xAcetyl:2H(3) [K179]	FALSE		0.000928123	0	1	1	26	P17900	P17900 [170-180]	0	1207.67	0	1.372	0.46	0.908591	38.52	1.729	0.655	1.372	0.79	-0.61	0.46	102.4	97.6	37.15	37.5	3	3	88.8	129.3	60.6	153.5	84.7	83.2	1	1	1	1	1	1	88.8	129.3	60.6	153.5	84.7
FALSE	High	[R].IEVGKFSVLEGQR.[L]	1xAcetyl:2H(3) [K5]	F1MM32 1xAcetyl:2H(3) [K319]	TRUE	FBS	0.00189242	0	1	1	1	F1MM32	F1MM32 [315-327]	0	1506.84	0	2.019	1.01	0.780615	29.19	0.01	2.417	2.019	-6.64	1.27	1.01	53.9	146.1	81.2	16.1	3	2	8	74.4	111.9		179.8	225.9	1	1	1		1	1	8	74.4	111.9		179.8
FALSE	High	[C].HEEHDHGPEALHR.[Q]	1xAcetyl:2H(3) [N-Term]	Q9ULF5 1xAcetyl:2H(3) [N-Term]	FALSE		3.15221e-05	0	1	1	5	Q9ULF5	Q9ULF5 [26-38]	0	1608.73	0	11.828	3.56	0.00926621	617.95	1.399	100		0.48	6.64		75.6	124.4		22.64	1	2	138.5			193.8	267.7		1			1	1		138.5			193.8	267.7
FALSE	High	[R].LKAELGIPLEEVPPEEINYLTR.[I]	1xAcetyl:2H(3) [K2]	Q13907 1xAcetyl:2H(3) [K113]	FALSE		9.46734e-05	0	1	1	18	Q13907	Q13907 [112-133]	0	2568.4	0	1.027	0.04	0.998323	13.43	9.25	0.934	1.027	3.21	-0.1	0.04	94	106	90.07	33.88	3	3	10.3	167.5	84.3	95	156.4	86.5	1	1	1	1	1	1	10.3	167.5	84.3	95	156.4
FALSE	High	[R].IKATNNKGKEKIYSAER.[F]	4xAcetyl:2H(3) [K2; K7; K9; K11]	Q16881 4xAcetyl:2H(3) [K291; K296; K298; K300]	FALSE		2.56851e-05	0	1	1	12	Q16881	Q16881 [290-306]	0	2130.19	0	0.865	-0.21	0.986492	33.83	0.865	0.602	2.461	-0.21	-0.73	1.3	82.8	117.2	59.91	40.82	3	3	70.5	166	58.5	61	99.9	144	1	1	1	1	1	1	70.5	166	58.5	61	99.9
FALSE	High	[R].IIKDFMIQGGDPTGTGR.[G]	1xAcetyl:2H(3) [K3]	Q9Y3C6 1xAcetyl:2H(3) [K58]	FALSE		0.000690537	0	1	1	2	Q9Y3C6	Q9Y3C6 [56-72]	0	1850.95	0
FALSE	High	[R].LLLFSDGNSQGATPAAIEKAVQEAQR.[A]	1xAcetyl:2H(3) [K19]	P12109 1xAcetyl:2H(3) [K957]	TRUE	FBS	0.00127607	0	1	2	5	P12109	P12109 [939-964]	0	2759.44	0	0.377	-1.41	0.542303	0	0.377			-1.41			145.3	54.7			1	1	435.8			164.2			1			1			435.8			164.2
FALSE	High	[R].LLLFSDGNSQGATPAAIEKAVQEAQR.[A]	1xAcetyl:2H(3) [K19]; 1xAcetyl:2H(3) [N-Term]	P12109 1xAcetyl:2H(3) [K957]; 1xAcetyl:2H(3) [N-Term]	TRUE	FBS	7.98774e-06	0	1	2	11	P12109	P12109 [939-964]	0	2804.47	0	0.667	-0.58	0.917515	41.76	0.245	0.667	1.239	-2.03	-0.58	0.31	120	80	63.32	29.23	3	3	225.3	90.9	75	55.2	60.7	92.9	1	1	1	1	1	1	225.3	90.9	75	55.2	60.7
FALSE	High	[S].ILLGGPGSGFPR.[I]	1xAcetyl:2H(3) [N-Term]	P98173 1xAcetyl:2H(3) [N-Term]	FALSE		0.000675006	0	1	1	15	P98173	P98173 [25-36]	0	1215.69	0	1.187	0.25	0.983531	24.81	0.867	1.385	1.187	-0.21	0.47	0.25	91.5	108.5	51.79	27.75	3	3	152.9	54.7	84.2	132.6	75.8	99.9	1	1	1	1	1	1	152.9	54.7	84.2	132.6	75.8
FALSE	High	[H].ILLHDFLLVPR.[E]	1xAcetyl:2H(3) [N-Term]	P10253 1xAcetyl:2H(3) [N-Term]	FALSE		0.00260137	0	1	1	2	P10253	P10253 [30-40]	0	1380.84	0	0.088	-3.5	0.0169893	0	0.088			-3.5			183.8	16.2			1	1	551.4			48.6			1			1			551.4			48.6
FALSE	High	[R].IINEPTAAAIAYGLDKKVGAER.[N]	2xAcetyl:2H(3) [K16; K17]	P11142 2xAcetyl:2H(3) [K187; K188]	FALSE		1.33373e-06	0	1	1	40	P11142	P11142 [172-193]	0	2390.32	0	1.256	0.33	0.914729	46.56	0.389	1.256	1.65	-1.36	0.33	0.72	92.7	107.3	40.64	39.81	3	3	151.6	75.9	82.4	58.9	95.3	135.9	1	1	1	1	1	1	151.6	75.9	82.4	58.9	95.3
FALSE	High	[R].IINEPTAAAIAYGLDKKVGAER.[N]	2xAcetyl:2H(3) [K16; K17]; 1xAcetyl:2H(3) [N-Term]	P11142 2xAcetyl:2H(3) [K187; K188]; 1xAcetyl:2H(3) [N-Term]	FALSE		1.72608e-06	0	1	1	81	P11142	P11142 [172-193]	0	2435.35	0	1.112	0.15	0.961721	60.45	0.451	1.112	1.566	-1.15	0.15	0.65	99	101	43.75	31.83	3	3	158.4	75.4	82.2	71.4	83.9	128.7	1	1	1	1	1	1	158.4	75.4	82.2	71.4	83.9
FALSE	High	[R].IINEPTAAAIAYGLDKR.[E]	1xAcetyl:2H(3) [K16]	P11021 1xAcetyl:2H(3) [K213]	FALSE		5.14493e-06	0	1	1	25	P11021	P11021 [198-214]	0	1861.03	0	0.564	-0.83	0.768903	6.35	0.488	0.564	1.396	-1.03	-0.83	0.48	113.3	86.7	23.28	44.75	3	3	105.2	142.7	91.9	51.4	80.5	128.2	1	1	1	1	1	1	105.2	142.7	91.9	51.4	80.5
FALSE	High	[R].IINEPTAAAIAYGLDKR.[E]	1xAcetyl:2H(3) [K16]; 1xAcetyl:2H(3) [N-Term]	P11021 1xAcetyl:2H(3) [K213]; 1xAcetyl:2H(3) [N-Term]	FALSE		0.000451606	0	1	1	11	P11021	P11021 [198-214]	0	1906.06	0	0.817	-0.29	0.980687	5.38	0.524	0.817	0.862	-0.93	-0.29	-0.21	113	87	12.23	16.11	3	3	132.2	105	111.5	69.3	85.8	96.1	1	1	1	1	1	1	132.2	105	111.5	69.3	85.8
FALSE	High	[R].IINEPTAAAIAYGLDR.[RT]			FALSE		9.72892e-06	0	2	2	31	P17066; P0DMV9	P17066 [174-189]; P0DMV9 [172-187]	0	1687.9	0	2.268	1.18	0.270279	68.78	1.114	2.268	3.321	0.16	1.18	1.73	61.4	138.6	17.22	39.27	3	3	76.8	57.5	57.8	85.5	130.5	191.9	1	1	1	1	1	1	76.8	57.5	57.8	85.5	130.5
FALSE	High	[R].IINEPTAAAIAYGLDR.[RT]	1xAcetyl:2H(3) [N-Term]	P17066 1xAcetyl:2H(3) [N-Term]; P0DMV9 1xAcetyl:2H(3) [N-Term]	FALSE		4.20517e-05	0	2	2	27	P17066; P0DMV9	P17066 [174-189]; P0DMV9 [172-187]	0	1732.93	0	2.203	1.14	0.301398	3.05	1.288	2.203	2.248	0.37	1.14	1.17	62.4	137.6	11.98	18.7	3	3	79.3	65.3	64.5	102.2	143.8	144.9	1	1	1	1	1	1	79.3	65.3	64.5	102.2	143.8
FALSE	High	[R].ILNNGHAFNVEFDDSQDKAVLKGGPLDGTYR.[L]	2xAcetyl:2H(3) [K18; K22]	P00918 2xAcetyl:2H(3) [K76; K80]	FALSE		0.000165949	0	1	1	24	P00918	P00918 [59-89]	0	3480.73	0	0.557	-0.84	0.802864	9.37	0.557	0.443	0.863	-0.84	-1.17	-0.21	138.6	61.4	32.65	61.7	3	3	77.6	132	154.9	43.2	58.5	133.7	1	1	1	1	1	1	77.6	132	154.9	43.2	58.5
FALSE	High	[R].ILNNGHAFNVEFDDSQDKAVLKGGPLDGTYR.[L]	2xAcetyl:2H(3) [K18; K22]; 1xAcetyl:2H(3) [N-Term]	P00918 2xAcetyl:2H(3) [K76; K80]; 1xAcetyl:2H(3) [N-Term]	FALSE		0.000316194	0	1	1	20	P00918	P00918 [59-89]	0	3525.76	0	1.021	0.03	0.999983	61.34	1.916	0.599	1.021	0.94	-0.74	0.03	102.7	97.3	66.75	28.08	3	3	33.3	174.9	110.6	63.7	104.7	112.9	1	1	1	1	1	1	33.3	174.9	110.6	63.7	104.7
FALSE	High	[R].IIPGFMCQGGDFTR.[PH]	1xCarbamidomethyl [C7]	P62937 1xCarbamidomethyl [C62]	FALSE		0.00121934	0	1	5	23	P62937	P62937 [56-69]	0	1598.75	0	1.531	0.61	0.748456	15.62	1.531	1.174	1.693	0.61	0.23	0.76	78.6	121.4	19.45	9.26	3	3	69.9	100.2	76.2	107.1	117.6	129	1	1	1	1	1	1	69.9	100.2	76.2	107.1	117.6
FALSE	High	[R].IIPGFMCQGGDFTR.[PH]	1xCarbamidomethyl [C7]; 1xAcetyl:2H(3) [N-Term]	P62937 1xCarbamidomethyl [C62]; 1xAcetyl:2H(3) [N-Term]	FALSE		0.00244841	0	1	5	22	P62937	P62937 [56-69]	0	1643.77	0	1.415	0.5	0.828643	34.62	1.415	0.9	1.746	0.5	-0.15	0.8	82.8	117.2	62.11	26.74	3	3	70.3	156.3	48.5	99.5	140.6	84.8	1	1	1	1	1	1	70.3	156.3	48.5	99.5	140.6
FALSE	High	[R].IISSIEQKEENKGGEDKLKMIR.[E]	4xAcetyl:2H(3) [K8; K12; K17; K19]	P62258 4xAcetyl:2H(3) [K69; K73; K78; K80]	FALSE		2.35564e-06	0	1	1	75	P62258	P62258 [62-83]	0	2725.48	0	0.992	-0.01	0.987065	11.22	1.068	0.992	0.528	0.09	-0.01	-0.92	103.2	96.8	22.65	43.23	3	3	87.4	134.1	99.6	93.3	133	52.6	1	1	1	1	1	1	87.4	134.1	99.6	93.3	133
FALSE	High	[R].IISSIEQKEENKGGEDKLKMIR.[E]	1xOxidation [M20]; 4xAcetyl:2H(3) [K8; K12; K17; K19]	P62258 1xOxidation [M81]; 4xAcetyl:2H(3) [K69; K73; K78; K80]	FALSE		1.4344e-07	0	1	1	87	P62258	P62258 [62-83]	0	2741.48	0	0.403	-1.31	0.39537	6.79	0.537	0.289	0.403	-0.9	-1.79	-1.31	130.1	69.9	30.54	41.06	3	3	126	108.1	190.3	67.7	31.3	76.7	1	1	1	1	1	1	126	108.1	190.3	67.7	31.3
FALSE	High	[R].IISSIEQKEENKGGEDKLKMIR.[E]	4xAcetyl:2H(3) [K8; K12; K17; K19]; 1xAcetyl:2H(3) [N-Term]	P62258 4xAcetyl:2H(3) [K69; K73; K78; K80]; 1xAcetyl:2H(3) [N-Term]	FALSE		0.00130542	0	1	1	20	P62258	P62258 [62-83]	0	2770.51	0	1.371	0.46	0.882342	6.59	1.432	0.931	1.371	0.52	-0.1	0.46	84.3	115.7	40.46	15.01	3	3	65.2	134.7	76.5	93.3	125.3	104.9	1	1	1	1	1	1	65.2	134.7	76.5	93.3	125.3
FALSE	High	[R].IISSIEQKEENKGGEDKLKMIR.[E]	1xOxidation [M20]; 4xAcetyl:2H(3) [K8; K12; K17; K19]; 1xAcetyl:2H(3) [N-Term]	P62258 1xOxidation [M81]; 4xAcetyl:2H(3) [K69; K73; K78; K80]; 1xAcetyl:2H(3) [N-Term]	FALSE		0.00137655	0	1	1	8	P62258	P62258 [62-83]	0	2786.51	0	0.01	-6.64	1.64805e-16	0	0.01	0.01	0.01	-6.64	-6.64	-6.64	200		55.87		3		276.5	71.8	251.7				1	1	1				276.5	71.8	251.7
FALSE	High	[R].ILTEAEIDAHLVALAERD.[-]			FALSE		0.00100122	0	1	1	14	P60900	P60900 [229-246]	1	1979.04	0	0.894	-0.16	0.982054	4.44	0.894	0.733	0.927	-0.16	-0.45	-0.11	115.4	84.6	34.9	34.47	3	3	138.8	121	66.1	124.1	88.7	61.3	1	1	1	1	1	1	138.8	121	66.1	124.1	88.7
FALSE	High	[R].LMKELEEIR.[K]	1xAcetyl:2H(3) [K3]	P68036 1xAcetyl:2H(3) [K9]	FALSE		0.00466019	0	1	2	5	P68036	P68036 [7-15]	0	1205.66	1	1.706	0.77	0.96318	47.17	2.469	1.163	1.706	1.3	0.22	0.77	79.7	120.3	7.6	40.85	3	3	75.7	74	65.5	186.9	86.1	111.8	1	1	1	1	1	1	75.7	74	65.5	186.9	86.1
FALSE	High	[R].LNDMASTDDGTLQSR.[L]			FALSE		7.65596e-05	0	1	1	5	Q9H6Z4	Q9H6Z4 [428-442]	0	1623.73	0	2.634	1.4	0.704487	73.67	1.325	2.634	30.067	0.41	1.4	4.91	46	154	97.23	33.27	3	3	103.3	40.9	6.8	136.8	107.6	204.7	1	1	1	1	1	1	103.3	40.9	6.8	136.8	107.6
FALSE	High	[R].LNEAAAGLNQAATELVQASR.[G]			FALSE		6.33363e-05	0	1	1	2	Q9Y490	Q9Y490 [1242-1261]	0	2027.05	0	6.298	2.65	0.205535	1172.35	0.397		100	-1.33		6.64	124.3	75.7		57.23	1	2	257.2			102		240.7	1			1		1	257.2			102
FALSE	High	[R].LNEQASEEILKVEQKYNKLR.[Q]	3xAcetyl:2H(3) [K11; K15; K18]	Q01105 3xAcetyl:2H(3) [K68; K72; K75]	FALSE		2.00881e-06	0	1	1	31	Q01105	Q01105 [58-77]	0	2567.4	0	0.624	-0.68	0.906812	7.21	0.546	0.624	1.357	-0.87	-0.68	0.44	84.9	115.1	60.72	50.32	3	3	68.2	191.1	78.1	37.2	119.3	106	1	1	1	1	1	1	68.2	191.1	78.1	37.2	119.3
FALSE	High	[R].LNEQASEEILKVEQKYNKLR.[Q]	3xAcetyl:2H(3) [K11; K15; K18]; 1xAcetyl:2H(3) [N-Term]	Q01105 3xAcetyl:2H(3) [K68; K72; K75]; 1xAcetyl:2H(3) [N-Term]	FALSE		0.000767871	0	1	1	11	Q01105	Q01105 [58-77]	0	2612.43	0	1.158	0.21	0.980687	49.7	100	0.77	1.158	6.64	-0.38	0.21	109.2	90.8	10.78	80.37	2	3		163	139.9	9.6	125.5	162		1	1	1	1	1		163	139.9	9.6	125.5
FALSE	High	[R].INKELSDLAR.[D]	1xAcetyl:2H(3) [K3]	P61077 1xAcetyl:2H(3) [K8]	FALSE		0.00184989	0	1	1	26	P61077	P61077 [6-15]	0	1203.68	0	2.205	1.14	0.359948	18.02	2.473	1.596	2.205	1.31	0.67	1.14	62.4	137.6	13.66	9.39	3	3	59	75.8	61.9	146	120.9	136.4	1	1	1	1	1	1	59	75.8	61.9	146	120.9
FALSE	High	[R].INNVPAEGENEVNNELANR.[M]			FALSE		7.92739e-06	0	1	1	11	Q9NUQ9	Q9NUQ9 [168-186]	0	2096	0	1.933	0.95	0.880001	13.71	1.754	1.933	3.4	0.81	0.95	1.77	54.2	145.8	26.95	26.28	3	3	80.4	52.4	51.2	140.9	101.2	174	1	1	1	1	1	1	80.4	52.4	51.2	140.9	101.2
FALSE	High	[R].INPDGSQSVVEVPYAR.[S]			FALSE		0.000295331	0	1	1	9	Q9Y2B0	Q9Y2B0 [58-73]	0	1730.87	0	0.64	-0.64	0.873406	9.56	2.094	0.539	0.64	1.07	-0.89	-0.64	122	78	82.65	43.26	3	3	24.4	221.2	112.3	51.1	119.2	71.8	1	1	1	1	1	1	24.4	221.2	112.3	51.1	119.2
FALSE	High	[R].IPKIQQLVKEFFNGKEPSR.[G]	3xAcetyl:2H(3) [K3; K9; K15]	P11021 3xAcetyl:2H(3) [K370; K376; K382]	FALSE		0.000465515	0	1	1	16	P11021	P11021 [368-386]	0	2393.35	0	0.578	-0.79	0.854712	48.38	0.013	0.578	1.196	-6.22	-0.79	0.26	126.7	73.3	12.56	95.63	3	3	146.8	126.4	114.7	2	73	137.2	1	1	1	1	1	1	146.8	126.4	114.7	2	73
FALSE	High	[R].ILHCLGLAEEIQKYCCSR.[K]	3xCarbamidomethyl [C4; C15; C16]; 1xAcetyl:2H(3) [K13]; 1xAcetyl:2H(3) [N-Term]	P53004 3xCarbamidomethyl [C281; C292; C293]; 1xAcetyl:2H(3) [K290]; 1xAcetyl:2H(3) [N-Term]	FALSE		0.00151908	0	1	1	1	P53004	P53004 [278-295]	0	2340.14	0	8.621	3.11	0.0254704	853.45		0.743	100		-0.43	6.64	108	92		19.25	1	2		220.5			163.9	215.6		1			1	1		220.5			163.9
FALSE	High	[T].LKAPDGLPALGPGLELAPFER.[R]	1xAcetyl:2H(3) [K2]; 1xAcetyl:2H(3) [N-Term]	Q5VSG8 1xAcetyl:2H(3) [K30]; 1xAcetyl:2H(3) [N-Term]	FALSE		0.00328975	0	1	1	1	Q5VSG8	Q5VSG8 [29-49]	0	2251.26	0	0.383	-1.38	0.601174	21.19	0.383	1.62	0.01	-1.38	0.7	-6.64	93.4	106.6	133.44	98.58	3	2	366.9	15.5	52	140.5	25.1		1	1	1	1	1		366.9	15.5	52	140.5	25.1
FALSE	High	[R].IIGYTPDLDPETVDDAFAR.[A]			FALSE		0.000229939	0	1	1	6	P08253	P08253 [128-146]	0	2108.02	0	34.652	5.11	9.35148e-06	188.24		12.007	100		3.59	6.64	12.7	187.3		28.24	1	2		19.4			232.4	348.3		1			1	1		19.4			232.4
FALSE	High	[R].LIGDAAKNQVAMNPTNTVFDAKR.[L]	1xOxidation [M12]; 2xAcetyl:2H(3) [K7; K22]	P11142 1xOxidation [M61]; 2xAcetyl:2H(3) [K56; K71]	FALSE		0.000154999	0	1	1	19	P11142	P11142 [50-72]	0	2580.34	0	1.501	0.59	0.766804	124.32	0.236	1.501	2.759	-2.08	0.59	1.46	118.6	81.4	44.99	106.22	3	3	116.5	42.5	93	27.5	63.8	256.7	1	1	1	1	1	1	116.5	42.5	93	27.5	63.8
FALSE	High	[R].IKATNNKGKEKIYSAER.[F]	4xAcetyl:2H(3) [K2; K7; K9; K11]; 1xAcetyl:2H(3) [N-Term]	Q16881 4xAcetyl:2H(3) [K291; K296; K298; K300]; 1xAcetyl:2H(3) [N-Term]	FALSE		0.000379319	0	1	1	13	Q16881	Q16881 [290-306]	0	2175.22	0	0.663	-0.59	0.890756	12.32	0.663	0.789	0.516	-0.59	-0.34	-0.95	111.8	88.2	32.58	17	3	3	94.1	105.4	168.2	62.4	83.1	86.8	1	1	1	1	1	1	94.1	105.4	168.2	62.4	83.1
FALSE	High	[R].LKDLEALLNSKEAALSTALSEKR.[T]	3xAcetyl:2H(3) [K2; K11; K22]	P02545 3xAcetyl:2H(3) [K135; K144; K155]	FALSE		0.00264107	0	1	1	3	P02545	P02545 [134-156]	0	2635.49	0	10.788	3.43	0.0942248	10.83	10.788	10	100	3.43	3.32	6.64	22	178	43.72	33.8	2	3	13.7	26		147.8	259.6	152.9	1	1		1	1	1	13.7	26		147.8	259.6
FALSE	High	[R].IKGGLFADIASHPWQAAIFAKHR.[R]	2xAcetyl:2H(3) [K2; K21]; 1xAcetyl:2H(3) [N-Term]	P00750 2xAcetyl:2H(3) [K312; K331]; 1xAcetyl:2H(3) [N-Term]	FALSE		4.67625e-05	0	1	1	18	P00750	P00750 [311-333]	0	2669.47	0	2.608	1.38	0.513603	5.58	2.608	2.51	100	1.38	1.33	6.64	83	117	73.68	96.28	2	3	118.7	37.4		309.6	93.8	40.5	1	1		1	1	1	118.7	37.4		309.6	93.8
FALSE	High	[R].LKGKDMVVDIQR.[R]	2xAcetyl:2H(3) [K2; K4]	Q9Y266 2xAcetyl:2H(3) [K194; K196]	FALSE		0.00117399	0	1	1	7	Q9Y266	Q9Y266 [193-204]	0	1491.85	0	3.294	1.72	0.336883	12.6	3.574	2.499	3.294	1.84	1.32	1.72	47.4	152.6	4.02	20.25	3	3	50.6	47.9	46.8	180.8	119.6	154.2	1	1	1	1	1	1	50.6	47.9	46.8	180.8	119.6
FALSE	High	[D].IKKQAEILQESR.[M]	2xAcetyl:2H(3) [K2; K3]	O75347 2xAcetyl:2H(3) [K51; K52]	FALSE		0.00252373	0	1	1	2	O75347	O75347 [50-61]	0	1532.89	0	3.864	1.95	0.723296	0		3.864			1.95		41.1	158.9			1	1		123.4			476.6			1			1			123.4			476.6
FALSE	High	[R].IKIGDPLLEDTR.[M]	1xAcetyl:2H(3) [K2]	P49189 1xAcetyl:2H(3) [K316]	FALSE		0.0013456	0	1	1	16	P49189	P49189 [315-326]	0	1414.8	0	1.968	0.98	0.50066	24.4	0.794	1.968	2.292	-0.33	0.98	1.2	70.5	129.5	45.68	18.64	3	3	124.5	58	62.1	98.9	114.2	142.4	1	1	1	1	1	1	124.5	58	62.1	98.9	114.2
FALSE	High	[R].LKPYGALVDKVKSFTKR.[F]	4xAcetyl:2H(3) [K2; K10; K12; K16]	P12109 4xAcetyl:2H(3) [K53; K61; K63; K67]	TRUE	FBS	0.000521598	0	1	2	7	P12109	P12109 [52-68]	0	2130.27	0	0.471	-1.09	0.672506	12.12	0.471	0.297	0.721	-1.09	-1.75	-0.47	148.1	51.9	36.15	24.81	3	3	168	165.4	80.4	79.1	49.1	58	1	1	1	1	1	1	168	165.4	80.4	79.1	49.1
FALSE	High	[R].LKPYGALVDKVKSFTKR.[F]	4xAcetyl:2H(3) [K2; K10; K12; K16]; 1xAcetyl:2H(3) [N-Term]	P12109 4xAcetyl:2H(3) [K53; K61; K63; K67]; 1xAcetyl:2H(3) [N-Term]	TRUE	FBS	8.23378e-06	0	1	2	38	P12109	P12109 [52-68]	0	2175.3	0	0.712	-0.49	0.939152	24.17	0.162	0.712	0.941	-2.63	-0.49	-0.09	118.7	81.3	77.28	21	3	3	269.2	91.9	66.9	43.5	65.5	63	1	1	1	1	1	1	269.2	91.9	66.9	43.5	65.5
FALSE	High	[R].LKQIEEQTKKAQQELEEQTR.[R]	3xAcetyl:2H(3) [K2; K9; K10]	P26038 3xAcetyl:2H(3) [K352; K359; K360]	FALSE		3.33909e-06	0	1	1	14	P26038	P26038 [351-370]	0	2592.38	0	1.789	0.84	0.601384	48.49	0.491	1.789	2.375	-1.03	0.84	1.25	95.5	104.5	58.02	52.99	3	3	146.5	45.9	75.1	71.9	82.2	178.4	1	1	1	1	1	1	146.5	45.9	75.1	71.9	82.2
FALSE	High	[R].LKQIEEQTKKAQQELEEQTRR.[A]	3xAcetyl:2H(3) [K2; K9; K10]	P26038 3xAcetyl:2H(3) [K352; K359; K360]	FALSE		0.0010399	0	1	1	12	P26038	P26038 [351-371]	1	2748.48	0	3.191	1.67	0.0532191	1.38	0.352	3.22	3.191	-1.5	1.69	1.67	67.2	132.8	84.92	50.63	3	3	169.1	33.6	54.8	59.6	108.2	174.7	1	1	1	1	1	1	169.1	33.6	54.8	59.6	108.2
FALSE	High	[R].LKQIEEQTIKAQKELEEQTR.[K]	3xAcetyl:2H(3) [K2; K10; K13]	P35241 3xAcetyl:2H(3) [K352; K360; K363]	FALSE		0.00042181	0	1	1	11	P35241	P35241 [351-370]	0	2577.41	0	0.936	-0.1	0.991106	0	0.936			-0.1			103.3	96.7			1	1	309.9			290.1			1			1			309.9			290.1
FALSE	High	[W].LKSNVSDAVAQSTR.[I]	1xAcetyl:2H(3) [K2]	P60174 1xAcetyl:2H(3) [K231]	FALSE		0.000490895	0	1	1	6	P60174	P60174 [230-243]	0	1520.81	0	1.151	0.2	0.998323	1.03	1.049	1.151	1.159	0.07	0.2	0.21	92.6	107.4	60.44	62.59	3	3	28.8	133.3	117.7	30.2	153.5	136.4	1	1	1	1	1	1	28.8	133.3	117.7	30.2	153.5
FALSE	High	[R].IKVNGKAGNLGGGVVTIER.[S]	2xAcetyl:2H(3) [K2; K6]	P35268 2xAcetyl:2H(3) [K48; K52]	FALSE		4.50223e-05	0	1	1	2	P35268	P35268 [47-65]	0	1972.15	0	2.423	1.28	0.93455	103.17	0.737	100	2.423	-0.44	6.64	1.28	102.9	97.1	128.01	93.49	2	3	283.3		14.1	208.7	59.7	34.2	1		1	1	1	1	283.3		14.1	208.7	59.7
FALSE	High	[R].LIADLGSTSITNLGFR.[D]			FALSE		2.51073e-05	0	1	1	8	Q92520	Q92520 [164-179]	0	1677.92	0	0.305	-1.71	0.384234	3.22	0.376	0.305	0.168	-1.41	-1.71	-2.58	145.3	54.7	73.94	36.3	3	3	111.8	75.2	298.1	42.1	22.9	50	1	1	1	1	1	1	111.8	75.2	298.1	42.1	22.9
FALSE	High	[R].LIADLGSTSITNLGFR.[D]	1xAcetyl:2H(3) [N-Term]	Q92520 1xAcetyl:2H(3) [N-Term]	FALSE		2.72918e-05	0	1	1	26	Q92520	Q92520 [164-179]	0	1722.95	0	0.403	-1.31	0.474987	2.71	0.449	0.339	0.403	-1.16	-1.56	-1.31	149.4	50.6	75.73	78.17	3	3	64.5	98.3	267.1	29	33.3	107.8	1	1	1	1	1	1	64.5	98.3	267.1	29	33.3
FALSE	High	[R].LLAEPVPGIKAEPDESNAR.[Y]	1xAcetyl:2H(3) [K10]	P61088 1xAcetyl:2H(3) [K24]	FALSE		0.00017633	0	1	2	15	P61088	P61088 [15-33]	0	2051.08	0	4.303	2.11	0.109538	4.58	4.303	4.436	1.362	2.11	2.15	0.45	63.1	136.9	36.07	59.55	3	3	58.8	28.1	57.5	252.9	124.6	78.3	1	1	1	1	1	1	58.8	28.1	57.5	252.9	124.6
FALSE	High	[R].IIALDGDTKNSTFSEIFKKEHPDR.[F]	3xAcetyl:2H(3) [K9; K18; K19]	P29401 3xAcetyl:2H(3) [K343; K352; K353]	FALSE		0.000963979	0	1	1	10	P29401	P29401 [335-358]	0	2896.5	0	1.174	0.23	0.954878	75.51	0.271	1.174	1.772	-1.89	0.23	0.83	97	103	43.72	56.33	3	3	160	75.7	83.7	43.3	88.9	148.4	1	1	1	1	1	1	160	75.7	83.7	43.3	88.9
FALSE	High	[R].IIDDSEITKEDDALWPPPDR.[V]	1xAcetyl:2H(3) [K9]	P61326 1xAcetyl:2H(3) [K71]; Q96A72 1xAcetyl:2H(3) [K73]	FALSE		0.00428789	0	2	2	37	P61326; Q96A72	P61326 [63-82]; Q96A72 [65-84]	0	2370.15	0	1.825	0.87	0.52809	32.11	5.917	1.429	1.825	2.56	0.52	0.87	61.7	138.3	48.85	25.24	3	3	27.7	69.3	85.1	163.8	99	155.2	1	1	1	1	1	1	27.7	69.3	85.1	163.8	99
FALSE	High	[R].LLDEEEATDNDLR.[A]			FALSE		0.000584436	0	1	1	7	Q8WUM4	Q8WUM4 [457-469]	0	1532.71	0	2.711	1.44	0.795531	84.46	1.166	2.711	6.699	0.22	1.44	2.74	53.9	146.1	30.92	58.67	3	3	67	45.7	37.1	78.2	123.8	248.3	1	1	1	1	1	1	67	45.7	37.1	78.2	123.8
FALSE	High	[R].IIDKNGIHDLDNISFPKQGS.[-]	2xAcetyl:2H(3) [K4; K17]	P49721 2xAcetyl:2H(3) [K185; K198]	FALSE		0.00438638	0	1	1	12	P49721	P49721 [182-201]	0	2301.2	0	1.007	0.01	0.999983	76.26	4.436	1.007	0.489	2.15	0.01	-1.03	92.6	107.4	58.93	41.56	3	3	30.3	131.9	114.6	134.3	132.9	56	1	1	1	1	1	1	30.3	131.9	114.6	134.3	132.9
FALSE	High	[R].LLEELEEGQKGVGDGTVSWGLEDDEDMTLTR.[W]	1xAcetyl:2H(3) [K10]	Q13404 1xAcetyl:2H(3) [K26]; Q15819 1xAcetyl:2H(3) [K24]	FALSE		0.0043533	0	2	2	5	Q13404; Q15819	Q13404 [17-47]; Q15819 [15-45]	0	3466.62	0	100	6.64	1.64805e-16	0	100	100	9.569	6.64	6.64	3.26	18.9	181.1		102.38	1	3			15.9	20.4	412	151.7			1	1	1	1			15.9	20.4	412
FALSE	High	[R].ILENEKDLEEAEEYKEAR.[L]	2xAcetyl:2H(3) [K6; K15]	O75347 2xAcetyl:2H(3) [K86; K95]	FALSE		8.95019e-06	0	1	1	44	O75347	O75347 [81-98]	0	2298.13	0	1.946	0.96	0.448972	3.24	1.989	1.946	0.94	0.99	0.96	-0.09	103	97	47.85	55.37	3	3	35.5	101	101.2	70.5	196.7	95.1	1	1	1	1	1	1	35.5	101	101.2	70.5	196.7
FALSE	High	[R].ILENEKDLEEAEEYKEAR.[L]	2xAcetyl:2H(3) [K6; K15]; 1xAcetyl:2H(3) [N-Term]	O75347 2xAcetyl:2H(3) [K86; K95]; 1xAcetyl:2H(3) [N-Term]	FALSE		8.57843e-05	0	1	1	9	O75347	O75347 [81-98]	0	2343.15	0	1.432	0.52	0.972143	10.64	2.155	1.432	1.329	1.11	0.52	0.41	82.2	117.8	49.55	30.18	3	3	41.4	77.7	120.4	89.2	111.2	160.1	1	1	1	1	1	1	41.4	77.7	120.4	89.2	111.2
FALSE	High	[R].LIFAGKQLEDGR.[T]	1xAcetyl:2H(3) [K6]	P62979 1xAcetyl:2H(3) [K48]	FALSE		0.000866907	0	1	4	51	P62979	P62979 [43-54]	0	1391.77	0	1.064	0.09	0.972143	2.47	1.082	1.064	0.886	0.11	0.09	-0.17	96.9	103.1	67.92	56.03	3	3	52.7	72	181.1	57.1	76.6	160.5	1	1	1	1	1	1	52.7	72	181.1	57.1	76.6
FALSE	High	[R].LIGDAAKNQLTSNPENTVFDAKR.[L]	2xAcetyl:2H(3) [K7; K22]	P11021 2xAcetyl:2H(3) [K81; K96]	FALSE		2.79199e-05	0	1	1	21	P11021	P11021 [75-97]	0	2592.35	0	0.781	-0.36	0.977194	13.34	0.665	0.781	2.41	-0.59	-0.36	1.27	106.5	93.5	20.54	53.56	3	3	96.9	109	71.7	64.5	85.1	172.8	1	1	1	1	1	1	96.9	109	71.7	64.5	85.1
FALSE	High	[R].LIGDAAKNQVALNPQNTVFDAKR.[L]	2xAcetyl:2H(3) [K7; K22]	P0DMV9 2xAcetyl:2H(3) [K56; K71]	FALSE		2.19033e-05	0	1	1	51	P0DMV9	P0DMV9 [50-72]	0	2573.4	0	1.929	0.95	0.458226	32.72	1.503	1.929	4.32	0.59	0.95	2.11	67	133	13.54	43.57	3	3	61.6	63.3	48.9	92.6	122.1	211.4	1	1	1	1	1	1	61.6	63.3	48.9	92.6	122.1
FALSE	High	[R].LIGDAAKNQVALNPQNTVFDAKR.[L]	1xAcetyl [N-Term]; 2xAcetyl:2H(3) [K7; K22]	P0DMV9 1xAcetyl [N-Term]; 2xAcetyl:2H(3) [K56; K71]	FALSE		0.00182207	0	1	1	8	P0DMV9	P0DMV9 [50-72]	0	2615.41	0	2.327	1.22	0.23828	34.94	1.667	2.327	2.876	0.74	1.22	1.52	64.7	135.3	44.9	68.99	3	3	45.5	40.9	88.4	75.9	95.3	254.1	1	1	1	1	1	1	45.5	40.9	88.4	75.9	95.3
FALSE	High	[R].LIGDAAKNQVALNPQNTVFDAKR.[L]	2xAcetyl:2H(3) [K7; K22]; 1xAcetyl:2H(3) [N-Term]	P0DMV9 2xAcetyl:2H(3) [K56; K71]; 1xAcetyl:2H(3) [N-Term]	FALSE		0.00233962	0	1	1	3	P0DMV9	P0DMV9 [50-72]	0	2618.42	0	2.375	1.25	0.206948	34.74	1.176	2.931	2.375	0.23	1.55	1.25	77.7	122.3	41.14	25.76	3	3	94.5	38.6	71.9	111.1	113.1	170.8	1	1	1	1	1	1	94.5	38.6	71.9	111.1	113.1
FALSE	High	[R].LIGDAAKNQVAMNPTNTVFDAKR.[L]	2xAcetyl:2H(3) [K7; K22]	P11142 2xAcetyl:2H(3) [K56; K71]	FALSE		4.20517e-05	0	1	1	24	P11142	P11142 [50-72]	0	2564.34	0	0.998	0	0.986008	37.07	0.748	0.998	1.991	-0.42	0	0.99	99.8	100.2	13.55	37.7	3	3	98.3	98.9	77.1	73.5	98.7	153.5	1	1	1	1	1	1	98.3	98.9	77.1	73.5	98.7
FALSE	High	[RK].LLGNVLVVVLAR.[RN]			TRUE	FBS	0.00144059	0	1	2	5	P02081	P02081 [104-115]	0	1265.83	0	0.61	-0.71	0.805518	0.81	0.601	0.61	0.929	-0.73	-0.71	-0.11	103.7	96.3	65.74	62.52	3	3	38.9	191.9	118.6	23.4	117.1	110.2	1	1	1	1	1	1	38.9	191.9	118.6	23.4	117.1
FALSE	High	[R].HEDAQKAVDEMNGKELNGKQIYVGR.[A]	3xAcetyl:2H(3) [K6; K14; K19]	P11940 3xAcetyl:2H(3) [K246; K254; K259]	FALSE		2.63948e-06	0	1	2	10	P11940	P11940 [241-265]	0	2964.48	0	2.686	1.43	0.344353	56.39	1.664	2.686	3.755	0.73	1.43	1.91	45.1	154.9	45.36	16.85	3	3	88.8	42.9	43.1	147.9	115.4	161.9	1	1	1	1	1	1	88.8	42.9	43.1	147.9	115.4
FALSE	High	[G].HCIIHAENDDKPEGLSPNVNR.[F]	1xCarbamidomethyl [C2]; 1xAcetyl:2H(3) [K11]; 1xAcetyl:2H(3) [N-Term]	Q3SZ57 1xCarbamidomethyl [C314]; 1xAcetyl:2H(3) [K323]; 1xAcetyl:2H(3) [N-Term]	TRUE	FBS	0.000444808	0	1	1	5	Q3SZ57	Q3SZ57 [313-333]	0	2505.21	0	1.445	0.53	0.989068	120.51	3.764	0.27	1.445	1.91	-1.89	0.53	81.8	118.2	52.98	68.04	3	3	50.4	140.7	74.1	189.7	38	107	1	1	1	1	1	1	50.4	140.7	74.1	189.7	38
FALSE	High	[A].HALAEGLGVIACIGEKLDER.[E]	1xCarbamidomethyl [C12]; 1xAcetyl:2H(3) [K16]; 1xAcetyl:2H(3) [N-Term]	P60174 1xCarbamidomethyl [C164]; 1xAcetyl:2H(3) [K168]; 1xAcetyl:2H(3) [N-Term]	FALSE		1.7658e-06	0	1	1	10	P60174	P60174 [153-172]	0	2241.18	0	2.701	1.43	0.661956	30.93	2.701	0.841	3.265	1.43	-0.25	1.71	54	146	102.16	26.17	3	3	39.7	180.2	28.4	107.4	151.6	92.7	1	1	1	1	1	1	39.7	180.2	28.4	107.4	151.6
FALSE	High	[R].EQHPTKIPVIIER.[Y]	1xGlu->pyro-Glu [N-Term]; 1xAcetyl:2H(3) [K6]	A6NCE7 1xGlu->pyro-Glu [N-Term]; 1xAcetyl:2H(3) [K30]	FALSE		0.00406659	0	1	2	8	A6NCE7	A6NCE7 [25-37]	0	1586.91	0	1.218	0.28	0.986492	92.19	1.218	3.365	0.46	0.28	1.75	-1.12	88.4	111.6	40.52	50.29	3	3	109.5	46.5	105.7	133.3	156.4	48.7	1	1	1	1	1	1	109.5	46.5	105.7	133.3	156.4
FALSE	High	[Y].EQKAAKLKEKYEKDIAAYR.[A]	1xGlu->pyro-Glu [N-Term]; 5xAcetyl:2H(3) [K3; K6; K8; K10; K13]	P26583 1xGlu->pyro-Glu [N-Term]; 5xAcetyl:2H(3) [K147; K150; K152; K154; K157]	FALSE		6.19114e-05	0	1	1	14	P26583	P26583 [145-163]	0	2489.39	0	1.802	0.85	0.860309	9.36	1.916	1.802	1.352	0.94	0.85	0.43	68.7	131.3	15.43	30.35	3	3	77.6	82.4	60.8	148.7	148.4	82.1	1	1	1	1	1	1	77.6	82.4	60.8	148.7	148.4
FALSE	High	[I].EQKTEGAEKKQQMAR.[E]	1xGlu->pyro-Glu [N-Term]; 3xAcetyl:2H(3) [K3; K9; K10]	P63104 1xGlu->pyro-Glu [N-Term]; 3xAcetyl:2H(3) [K68; K74; K75]	FALSE		0.000119767	0	1	1	18	P63104	P63104 [66-80]	0	1878.97	0	1.45	0.54	0.947628	2.89	1.422	1.558	1.45	0.51	0.64	0.54	81.1	118.9	4.3	6.33	3	3	83.9	81.4	77	119.3	126.8	111.7	1	1	1	1	1	1	83.9	81.4	77	119.3	126.8
FALSE	High	[I].EQKTEGAEKKQQMAR.[E]	1xGlu->pyro-Glu [N-Term]; 1xOxidation [M13]; 3xAcetyl:2H(3) [K3; K9; K10]	P63104 1xGlu->pyro-Glu [N-Term]; 1xOxidation [M78]; 3xAcetyl:2H(3) [K68; K74; K75]	FALSE		0.000113575	0	1	1	6	P63104	P63104 [66-80]	0	1894.96	0	1.577	0.66	0.997389	119.88	0.302	3.206	1.577	-1.73	1.68	0.66	124.7	75.3	77.84	66.23	3	3	180.7	20.4	108.3	54.5	65.4	170.7	1	1	1	1	1	1	180.7	20.4	108.3	54.5	65.4
FALSE	High	[Q].EQLALEMAELTAR.[I]	1xGlu->pyro-Glu [N-Term]	P26038 1xGlu->pyro-Glu [N-Term]	FALSE		0.000963979	0	1	1	13	P26038	P26038 [415-427]	0	1456.75	0	1.013	0.02	0.999636	24.75	0.553	1.183	1.013	-0.85	0.24	0.02	106	94	46.74	16.79	3	3	164.9	62.7	102.9	91.2	74.1	104.2	1	1	1	1	1	1	164.9	62.7	102.9	91.2	74.1
FALSE	High	[N].EQLEKLQEQVTDLR.[S]	1xGlu->pyro-Glu [N-Term]; 1xAcetyl:2H(3) [K5]	P12270 1xGlu->pyro-Glu [N-Term]; 1xAcetyl:2H(3) [K699]	FALSE		0.00360266	0	1	1	3	P12270	P12270 [695-708]	0	1755.93	0	1.23	0.3	0.999636	0	1.23			0.3			89.7	110.3			1	1	269			331			1			1			269			331
FALSE	High	[R].EQLGPVTQEFWDNLEKETASLR.[Q]	1xAcetyl:2H(3) [K16]	P15497 1xAcetyl:2H(3) [K100]	TRUE	FBS	1.74459e-05	0	1	1	15	P15497	P15497 [85-106]	0	2635.31	0	1.603	0.68	0.939152	48.93	26.187	1.074	1.603	4.71	0.1	0.68	54.7	145.3	89.44	78.5	3	3	10.9	97	39.3	285.7	104.2	62.9	1	1	1	1	1	1	10.9	97	39.3	285.7	104.2
FALSE	High	[S].EQLKALGEKAKPVLEDLR.[Q]	1xGlu->pyro-Glu [N-Term]; 3xAcetyl:2H(3) [K4; K9; K11]	P15497 1xGlu->pyro-Glu [N-Term]; 3xAcetyl:2H(3) [K223; K228; K230]	TRUE	FBS	0.00148493	0	1	1	6	P15497	P15497 [220-237]	0	2154.25	0	1.653	0.72	0.939152	42.43	14.574	1.653	1.18	3.87	0.72	0.24	66	134	45.81	87.22	3	3	21.4	60.2	49	312.2	99.4	57.8	1	1	1	1	1	1	21.4	60.2	49	312.2	99.4
FALSE	High	[V].EQLIKKHEEEEAKAER.[E]	1xGlu->pyro-Glu [N-Term]; 3xAcetyl:2H(3) [K5; K6; K13]	P25789 1xGlu->pyro-Glu [N-Term]; 3xAcetyl:2H(3) [K238; K239; K246]	FALSE		9.25436e-05	0	1	1	5	P25789	P25789 [234-249]	0	2084.1	0	1.868	0.9	0.975159	48.18	1.261	2.48	1.868	0.33	1.31	0.9	69.7	130.3	13.82	45.29	3	3	59.2	78.1	67.8	74.7	193.6	126.7	1	1	1	1	1	1	59.2	78.1	67.8	74.7	193.6
FALSE	High	[L].EQLLLAVVKSIR.[S]	1xGlu->pyro-Glu [N-Term]; 1xAcetyl:2H(3) [K9]	P08758 1xGlu->pyro-Glu [N-Term]; 1xAcetyl:2H(3) [K242]	FALSE		0.00136616	0	1	1	33	P08758	P08758 [234-245]	0	1395.88	0	0.746	-0.42	0.947183	10.82	0.897	0.648	0.746	-0.16	-0.63	-0.42	114.6	85.4	45.88	33	3	3	59.2	164.7	123.9	53.1	106.7	92.4	1	1	1	1	1	1	59.2	164.7	123.9	53.1	106.7
FALSE	High	[Q].EQLLTLASILR.[E]	1xGlu->pyro-Glu [N-Term]	Q9Y5Z4 1xGlu->pyro-Glu [N-Term]	FALSE		0.00204138	0	1	1	18	Q9Y5Z4	Q9Y5Z4 [153-163]	0	1238.75	0	1.71	0.77	0.93455	24.67	1.425	2.407	1.71	0.51	1.27	0.77	73.8	126.2	9.44	17.3	3	3	76.9	63.7	72.5	109.6	153.4	123.9	1	1	1	1	1	1	76.9	63.7	72.5	109.6	153.4
FALSE	High	[K].EQLQDMGLEDLFSPEKSR.[L]	1xGlu->pyro-Glu [N-Term]; 1xAcetyl:2H(3) [K16]	F1MSZ6 1xGlu->pyro-Glu [N-Term]; 1xAcetyl:2H(3) [K381]	TRUE	FBS	0.00103205	0	1	1	15	F1MSZ6	F1MSZ6 [366-383]	0	2149.03	0	0.52	-0.94	0.683089	1.48	0.52	0.875	0.5	-0.94	-0.19	-1	116.8	83.2	57.6	43	3	3	209.4	75.8	93.1	108.8	66.3	46.6	1	1	1	1	1	1	209.4	75.8	93.1	108.8	66.3
FALSE	High	[M].EQISQFLQAAER.[Y]	1xGlu->pyro-Glu [N-Term]	P37802 1xGlu->pyro-Glu [N-Term]	FALSE		0.00080361	0	1	1	13	P37802	P37802 [91-102]	0	1401.71	0	1.999	1	0.890938	89.87	0.787	4.04	1.999	-0.34	2.01	1	66.7	133.3	95.88	18.77	3	3	177.7	25	52.2	139.9	100.8	104.4	1	1	1	1	1	1	177.7	25	52.2	139.9	100.8
FALSE	High	[R].EQHGVAASCLEDLR.[S]	1xCarbamidomethyl [C9]; 1xAcetyl:2H(3) [N-Term]	O00273 1xCarbamidomethyl [C38]; 1xAcetyl:2H(3) [N-Term]	FALSE		0.000971315	0	1	1	2	O00273	O00273 [30-43]	0	1629.77	0	0.942	-0.09	0.98859	67.97	0.942	1.627	0.455	-0.09	0.7	-1.14	103	97	40.66	23.48	3	3	97.3	70.2	155.9	91.6	114.2	70.9	1	1	1	1	1	1	97.3	70.2	155.9	91.6	114.2
FALSE	High	[R].EQMEAEIAHLKQENGILR.[D]	1xGlu->pyro-Glu [N-Term]; 1xAcetyl:2H(3) [K11]	Q86UP2 1xGlu->pyro-Glu [N-Term]; 1xAcetyl:2H(3) [K423]	FALSE		0.00215256	0	1	1	4	Q86UP2	Q86UP2 [413-430]	0	2136.09	0	1.33	0.41	0.999636	58.26	0.807	100	1.33	-0.31	6.64	0.41	91.4	108.6	15.8	21.22	2	3	122.1		97.6	98.5	152.1	129.7	1		1	1	1	1	122.1		97.6	98.5	152.1
FALSE	High	[S].EQNLVDCSRPQGNQGCNGGFMAR.[A]	2xCarbamidomethyl [C7; C16]; 1xGlu->pyro-Glu [N-Term]	O60911 2xCarbamidomethyl [C169; C178]; 1xGlu->pyro-Glu [N-Term]	FALSE		0.00100122	0	1	1	14	O60911	O60911 [163-185]	0	2577.11	0	0.46	-1.12	0.750449	5.93	0.837	0.46	0.373	-0.26	-1.12	-1.42	132	68	59.06	26.22	3	3	69.4	112.6	224.4	58	51.8	83.7	1	1	1	1	1	1	69.4	112.6	224.4	58	51.8
FALSE	High	[G].EQPSPKQEVWLANGAAESR.[G]	1xGlu->pyro-Glu [N-Term]; 1xAcetyl:2H(3) [K6]	O00584 1xGlu->pyro-Glu [N-Term]; 1xAcetyl:2H(3) [K223]	FALSE		7.83215e-05	0	1	1	15	O00584	O00584 [218-236]	0	2124.05	0	0.368	-1.44	0.562198	0.64	0.38	0.368	0.286	-1.4	-1.44	-1.81	147	53	16.59	2.37	3	3	130.1	140.7	177.3	49.4	51.8	50.7	1	1	1	1	1	1	130.1	140.7	177.3	49.4	51.8
FALSE	High	[K].EQQEAIEHIDEVQNEIDR.[L]	1xGlu->pyro-Glu [N-Term]	Q01105 1xGlu->pyro-Glu [N-Term]	FALSE		2.29231e-05	0	1	2	19	Q01105	Q01105 [40-57]	0	2177.01	0	0.376	-1.41	0.270279	0.43	0.376	0.826	0.369	-1.41	-0.28	-1.44	128.7	71.3	31.94	45.93	3	3	98.3	119.7	179.9	37	98.8	66.3	1	1	1	1	1	1	98.3	119.7	179.9	37	98.8
FALSE	High	[KA].EQQQLIDDHFLFDKPVSPLLLASGMAR.[D]	1xGlu->pyro-Glu [N-Term]; 1xAcetyl:2H(3) [K14]	P06732 1xGlu->pyro-Glu [N-Term]; 1xAcetyl:2H(3) [K196]; P12277 1xGlu->pyro-Glu [N-Term]; 1xAcetyl:2H(3) [K196]	FALSE		0.00186396	0	2	2	14	P06732; P12277	P06732 [183-209]; P12277 [183-209]	0	3095.61	0	0.698	-0.52	0.908591	10.52	0.698	0.905	0.596	-0.52	-0.14	-0.75	125.3	74.7	32.65	52.86	3	3	79.5	153.2	108.4	55.5	138.7	64.6	1	1	1	1	1	1	79.5	153.2	108.4	55.5	138.7
FALSE	High	[KA].EQQQLIDDHFLFDKPVSPLLLASGMAR.[D]	1xGlu->pyro-Glu [N-Term]; 1xOxidation [M25]; 1xAcetyl:2H(3) [K14]	P06732 1xGlu->pyro-Glu [N-Term]; 1xOxidation [M207]; 1xAcetyl:2H(3) [K196]; P12277 1xGlu->pyro-Glu [N-Term]; 1xOxidation [M207]; 1xAcetyl:2H(3) [K196]	FALSE		0.00354852	0	2	2	7	P06732; P12277	P06732 [183-209]; P12277 [183-209]	0	3111.6	0	0.366	-1.45	0.405096	1.42	0.366	0.88	0.34	-1.45	-0.19	-1.56	115.4	84.6	65.33	39.88	3	3	94.1	78.4	242	34.4	69	82.2	1	1	1	1	1	1	94.1	78.4	242	34.4	69
FALSE	High	[A].EQQVPLVLWSSDR.[D]	1xAcetyl:2H(3) [N-Term]	Q15904 1xAcetyl:2H(3) [N-Term]	FALSE		0.00131535	0	1	1	11	Q15904	Q15904 [42-54]	0	1601.84	0	1.115	0.16	0.998323	27.17	0.56	1.319	1.115	-0.84	0.4	0.16	94.6	105.4	16.17	51.77	3	3	85.8	116.2	93	48.1	153.3	103.6	1	1	1	1	1	1	85.8	116.2	93	48.1	153.3
FALSE	High	[Q].EQTIAEDLVVTKYKMGGDIANR.[V]	1xGlu->pyro-Glu [N-Term]; 2xAcetyl:2H(3) [K12; K14]	Q9UQ80 1xGlu->pyro-Glu [N-Term]; 2xAcetyl:2H(3) [K20; K22]	FALSE		8.35963e-06	0	1	1	26	Q9UQ80	Q9UQ80 [9-30]	0	2523.3	0	0.584	-0.78	0.879819	16.89	0.584	1.362	0.389	-0.78	0.45	-1.36	121.7	78.3	31.36	49.39	3	3	96.5	95.4	159.6	56.4	129.9	62.1	1	1	1	1	1	1	96.5	95.4	159.6	56.4	129.9
FALSE	High	[M].EQVENGLKEKTLKKWLR.[M]	1xGlu->pyro-Glu [N-Term]; 4xAcetyl:2H(3) [K8; K10; K13; K14]	Q9N2I2 1xGlu->pyro-Glu [N-Term]; 4xAcetyl:2H(3) [K279; K281; K284; K285]	TRUE	FBS	0.000255697	0	1	1	14	Q9N2I2	Q9N2I2 [272-288]	0	2261.3	0	0.459	-1.12	0.518491	15.4	0.685	0.459	0.158	-0.54	-1.12	-2.66	137	63	14.83	50.96	3	3	122.8	138.8	164.5	84.2	63.8	25.9	1	1	1	1	1	1	122.8	138.8	164.5	84.2	63.8
FALSE	High	[Y].EQWGKLTDCVVMR.[D]	1xCarbamidomethyl [C9]; 1xGlu->pyro-Glu [N-Term]; 1xAcetyl:2H(3) [K5]	P22626 1xCarbamidomethyl [C50]; 1xGlu->pyro-Glu [N-Term]; 1xAcetyl:2H(3) [K46]	FALSE		0.00432047	0	1	1	2	P22626	P22626 [42-54]	0	1648.8	0	2.64	1.4	0.787668	45.61	2.64	3.453	1.492	1.4	1.79	0.58	47	153	38.7	59.2	3	3	72.1	58.4	31.1	190.3	201.6	46.5	1	1	1	1	1	1	72.1	58.4	31.1	190.3	201.6
FALSE	High	[F].EQYGKIEVIEIMTDR.[G]	1xGlu->pyro-Glu [N-Term]; 1xAcetyl:2H(3) [K5]	P09651 1xGlu->pyro-Glu [N-Term]; 1xAcetyl:2H(3) [K130]	FALSE		0.000229939	0	1	2	8	P09651	P09651 [126-140]	0	1850.94	0	2.713	1.44	0.803978	3.44	2.65	2.952	2.713	1.41	1.56	1.44	50.6	149.4	42.97	39.56	3	3	79	46.1	34.9	209.3	136	94.7	1	1	1	1	1	1	79	46.1	34.9	209.3	136
FALSE	High	[R].EREDEIATMECINNGKSIFEAR.[L]	1xCarbamidomethyl [C11]; 1xAcetyl:2H(3) [K16]	P49189 1xCarbamidomethyl [C96]; 1xAcetyl:2H(3) [K101]	FALSE		0.000184539	0	1	1	8	P49189	P49189 [86-107]	1	2657.24	0	1.636	0.71	0.882342	29.89	0.982	1.636	1.966	-0.03	0.71	0.98	75.9	124.1	19.11	16.7	3	3	97.8	78.5	67.1	96	128.5	132	1	1	1	1	1	1	97.8	78.5	67.1	96	128.5
FALSE	High	[S].ERMPCTEDYLSLILNR.[L]	1xCarbamidomethyl [C5]; 1xGlu->pyro-Glu [N-Term]	P02769 1xCarbamidomethyl [C471]; 1xGlu->pyro-Glu [N-Term]	TRUE	FBS	0.00129556	0	1	1	26	P02769	P02769 [467-482]	1	1991.97	0	0.723	-0.47	0.961246	28.62	3.886	0.723	0.456	1.96	-0.47	-1.13	116.1	83.9	46.2	133.38	3	3	89.2	68.4	31.7	346.8	49.5	14.4	1	1	1	1	1	1	89.2	68.4	31.7	346.8	49.5
FALSE	High	[S].ERMPCTEDYLSLILNR.[L]	1xCarbamidomethyl [C5]; 1xGlu->pyro-Glu [N-Term]; 1xOxidation [M3]	P02769 1xCarbamidomethyl [C471]; 1xGlu->pyro-Glu [N-Term]; 1xOxidation [M469]	TRUE	FBS	0.00428789	0	1	1	21	P02769	P02769 [467-482]	1	2007.96	0	0.626	-0.68	0.908591	19.39	1.655	0.626	0.417	0.73	-0.68	-1.26	92.8	107.2	67.49	48.51	3	3	74.6	67.3	206.6	123.4	42.1	86.1	1	1	1	1	1	1	74.6	67.3	206.6	123.4	42.1
FALSE	High	[E].EQNKEALQDVEDENQ.[-]	1xGlu->pyro-Glu [N-Term]; 1xAcetyl:2H(3) [K4]	P62258 1xGlu->pyro-Glu [N-Term]; 1xAcetyl:2H(3) [K244]	FALSE		0.000444808	0	1	1	11	P62258	P62258 [241-255]	0	1815.81	0	1.105	0.14	0.998039	2.13	1.09	1.191	1.105	0.12	0.25	0.14	95.7	104.3	20.53	17.39	3	3	94.1	74.9	113.6	102.5	89.3	125.6	1	1	1	1	1	1	94.1	74.9	113.6	102.5	89.3
FALSE	High	[G].EQGVVPTQDVLSMLGDIR.[R]	1xGlu->pyro-Glu [N-Term]	Q9NZ53 1xGlu->pyro-Glu [N-Term]	FALSE		0.00304983	0	1	1	5	Q9NZ53	Q9NZ53 [453-470]	0	1939	0	1.364	0.45	0.995022	60.25	0.81	1.364	3.754	-0.3	0.45	1.91	42.1	157.9	108.84	57.14	3	3	198.1	28.9	36.4	160.4	39.4	136.8	1	1	1	1	1	1	198.1	28.9	36.4	160.4	39.4
FALSE	High	[N].EQGLFDVHSVLR.[V]	1xGlu->pyro-Glu [N-Term]	Q5ZPR3 1xGlu->pyro-Glu [N-Term]	FALSE		0.0017149	0	1	1	6	Q5ZPR3	Q5ZPR3 [416-427]	0	1381.72	0	1.083	0.12	0.999983	9.17	1.016	1.083	1.374	0.02	0.12	0.46	97	103	34.61	41.43	3	3	113	55.4	108.1	114.8	60.1	148.6	1	1	1	1	1	1	113	55.4	108.1	114.8	60.1
FALSE	High	[R].EQGFETKDIKEIAKKTQALPKMNSKR.[Q]	6xAcetyl:2H(3) [K7; K10; K14; K15; K21; K25]	P55263 6xAcetyl:2H(3) [K256; K259; K263; K264; K270; K274]	FALSE		0.00232197	0	1	1	11	P55263	P55263 [250-275]	0	3288.82	0	0.876	-0.19	0.975159	24.26	0.69	1.382	0.876	-0.54	0.47	-0.19	105.5	94.5	27.1	9.28	3	3	133.1	76.8	102.4	91.8	106.1	89.8	1	1	1	1	1	1	133.1	76.8	102.4	91.8	106.1
FALSE	High	[G].EPEELMVDNWRPAQPLKNR.[Q]	1xGlu->pyro-Glu [N-Term]; 1xAcetyl:2H(3) [K17]	P00918 1xGlu->pyro-Glu [N-Term]; 1xAcetyl:2H(3) [K251]	FALSE		0.000246182	0	1	1	18	P00918	P00918 [235-253]	0	2349.18	0	0.809	-0.31	0.976719	11.54	0.905	0.703	0.809	-0.14	-0.51	-0.31	110.6	89.4	21.79	9.85	3	3	86.8	135.4	112.9	78.5	95.1	91.3	1	1	1	1	1	1	86.8	135.4	112.9	78.5	95.1
FALSE	High	[G].EPEELMVDNWRPAQPLKNR.[Q]	1xGlu->pyro-Glu [N-Term]; 1xOxidation [M6]; 1xAcetyl:2H(3) [K17]	P00918 1xGlu->pyro-Glu [N-Term]; 1xOxidation [M240]; 1xAcetyl:2H(3) [K251]	FALSE		0.00189242	0	1	1	12	P00918	P00918 [235-253]	0	2365.18	0	0.299	-1.74	0.129333	5.03	0.186	2.436	0.299	-2.43	1.28	-1.74	160.7	39.3	77.06	13.96	3	3	239.2	19.3	192.3	44.5	47.1	57.6	1	1	1	1	1	1	239.2	19.3	192.3	44.5	47.1
FALSE	High	[K].EPESILQVLSQMEKIVR.[I]	1xGlu->pyro-Glu [N-Term]; 1xAcetyl:2H(3) [K14]	P17174 1xGlu->pyro-Glu [N-Term]; 1xAcetyl:2H(3) [K290]	FALSE		0.000620987	0	1	1	1	P17174	P17174 [277-293]	0	2026.11	0
FALSE	High	[G].EPKCPLMVKVLDAVR.[G]	1xCarbamidomethyl [C4]; 1xGlu->pyro-Glu [N-Term]; 2xAcetyl:2H(3) [K3; K9]	O46375 1xCarbamidomethyl [C30]; 1xGlu->pyro-Glu [N-Term]; 2xAcetyl:2H(3) [K29; K35]	TRUE	FBS	0.000126298	0	1	1	28	O46375	O46375 [27-41]	0	1827.01	0	1.12	0.16	0.998323	54.32	5.617	0.71	1.12	2.49	-0.5	0.16	67.3	132.7	84.36	42.01	3	3	29.1	164.7	59.3	163.6	116.9	66.4	1	1	1	1	1	1	29.1	164.7	59.3	163.6	116.9
FALSE	High	[G].EPKGELLEAIKR.[D]	1xGlu->pyro-Glu [N-Term]; 2xAcetyl:2H(3) [K3; K11]	P04179 1xGlu->pyro-Glu [N-Term]; 2xAcetyl:2H(3) [K114; K122]	FALSE		0.0016637	0	1	1	20	P04179	P04179 [112-123]	0	1454.85	0	1.046	0.06	0.993103	51.66	1.046	1.41	0.548	0.06	0.5	-0.87	108.7	91.3	24.79	37.26	3	3	79.1	98.6	129.5	82.8	139	71	1	1	1	1	1	1	79.1	98.6	129.5	82.8	139
FALSE	High	[R].EPLFLDLPKSVDWR.[K]	1xGlu->pyro-Glu [N-Term]; 1xAcetyl:2H(3) [K9]	O60911 1xGlu->pyro-Glu [N-Term]; 1xAcetyl:2H(3) [K116]	FALSE		0.00260137	0	1	1	14	O60911	O60911 [108-121]	0	1741.94	0	0.643	-0.64	0.85811	1.53	0.643	0.406	0.659	-0.64	-1.3	-0.6	122.6	77.4	7.13	19.16	3	3	121.6	138.4	123.8	78.2	56.2	81.7	1	1	1	1	1	1	121.6	138.4	123.8	78.2	56.2
FALSE	High	[S].EPLGGKLLEEYTQLAR.[E]	1xGlu->pyro-Glu [N-Term]; 1xAcetyl:2H(3) [K6]	Q86X76 1xGlu->pyro-Glu [N-Term]; 1xAcetyl:2H(3) [K108]	FALSE		0.00129556	0	1	1	13	Q86X76	Q86X76 [103-118]	0	1844	0	1.21	0.28	0.988733	47.78	0.819	1.6	1.21	-0.29	0.68	0.28	106.4	93.6	28.08	56.07	3	3	88.4	114.2	64.3	72.4	182.8	77.8	1	1	1	1	1	1	88.4	114.2	64.3	72.4	182.8
FALSE	High	[Q].EPMEEKVVVLPFPSKEQR.[S]	1xGlu->pyro-Glu [N-Term]; 2xAcetyl:2H(3) [K6; K15]	Q58D62 1xGlu->pyro-Glu [N-Term]; 2xAcetyl:2H(3) [K357; K366]	TRUE	FBS	0.000993659	0	1	1	3	Q58D62	Q58D62 [352-369]	0	2214.17	0	0.627	-0.67	0.908591	31.06	2.95	0.627	0.293	1.56	-0.67	-1.77	122.9	77.1	26.25	87.04	3	3	68.5	111.6	114.5	202	69.9	33.5	1	1	1	1	1	1	68.5	111.6	114.5	202	69.9
FALSE	High	[G].EPNQRPELKNHIDR.[V]	1xGlu->pyro-Glu [N-Term]; 1xAcetyl:2H(3) [K9]	Q14118 1xGlu->pyro-Glu [N-Term]; 1xAcetyl:2H(3) [K500]	TRUE	FBS	0.00117399	0	1	2	20	Q14118	Q14118 [492-505]	0	1772.92	0	1.975	0.98	0.811315	32.64	1.507	2.41	1.975	0.59	1.27	0.98	71	129	39.46	23.47	3	3	93.5	39.6	77.5	140.9	95.3	153.2	1	1	1	1	1	1	93.5	39.6	77.5	140.9	95.3
FALSE	High	[S].EPQELLVNYVSDVR.[V]	1xGlu->pyro-Glu [N-Term]	P43121 1xGlu->pyro-Glu [N-Term]	FALSE		0.00331475	0	1	1	3	P43121	P43121 [334-347]	0	1642.84	0	1.009	0.01	0.975159	97.3	1.009	1.671	0.01	0.01	0.74	-6.64	78.5	121.5	23.96	10.71	3	2	132.2	92.9	86.2	133.4	155.3		1	1	1	1	1		132.2	92.9	86.2	133.4	155.3
FALSE	High	[D].EPQNLIKQNCDQFEKLGEYGFQNALIVR.[Y]	1xCarbamidomethyl [C10]; 1xGlu->pyro-Glu [N-Term]; 2xAcetyl:2H(3) [K7; K15]	P02769 1xCarbamidomethyl [C415]; 1xGlu->pyro-Glu [N-Term]; 2xAcetyl:2H(3) [K412; K420]	TRUE	FBS	0.000282193	0	1	1	19	P02769	P02769 [406-433]	0	3423.73	0	0.694	-0.53	0.938486	30.51	1.578	0.694	0.397	0.66	-0.53	-1.33	124.7	75.3	8.85	75.13	3	3	111.9	94.4	108.6	176.5	65.5	43.2	1	1	1	1	1	1	111.9	94.4	108.6	176.5	65.5
FALSE	High	[N].EPTAAAIAYGLDKKVGAER.[N]	1xGlu->pyro-Glu [N-Term]; 2xAcetyl:2H(3) [K13; K14]	P11142 1xGlu->pyro-Glu [N-Term]; 2xAcetyl:2H(3) [K187; K188]	FALSE		5.89751e-06	0	1	1	45	P11142	P11142 [175-193]	0	2032.1	0	0.764	-0.39	0.97316	22.43	0.565	1.121	0.764	-0.82	0.16	-0.39	112.4	87.6	29.73	6.01	3	3	149.4	82.5	108.4	84.5	92.5	82.7	1	1	1	1	1	1	149.4	82.5	108.4	84.5	92.5
FALSE	High	[N].EPTAAAIAYGLDKR.[E]	1xGlu->pyro-Glu [N-Term]; 1xAcetyl:2H(3) [K13]	P11021 1xGlu->pyro-Glu [N-Term]; 1xAcetyl:2H(3) [K213]	FALSE		0.000218049	0	1	1	18	P11021	P11021 [201-214]	0	1502.8	0	0.759	-0.4	0.962595	10.79	0.663	0.883	0.759	-0.59	-0.18	-0.4	115.3	84.7	15.79	3.2	3	3	129.9	94.5	117.2	86.1	83.4	88.9	1	1	1	1	1	1	129.9	94.5	117.2	86.1	83.4
FALSE	High	[N].EPTAAAIAYGLDR.[RT]	1xGlu->pyro-Glu [N-Term]	P17066 1xGlu->pyro-Glu [N-Term]; P0DMV9 1xGlu->pyro-Glu [N-Term]	FALSE		0.00131535	0	2	2	46	P17066; P0DMV9	P17066 [177-189]; P0DMV9 [175-187]	0	1329.68	0	2.425	1.28	0.209446	39.31	1.078	3.068	2.425	0.11	1.62	1.28	62	138	43.96	13.96	3	3	102.9	44	60.5	110.9	134.8	146.8	1	1	1	1	1	1	102.9	44	60.5	110.9	134.8
FALSE	High	[K].EPVKKIFVGGLSPDTPEEKIR.[E]	1xGlu->pyro-Glu [N-Term]; 3xAcetyl:2H(3) [K4; K5; K19]	Q14103 1xGlu->pyro-Glu [N-Term]; 3xAcetyl:2H(3) [K182; K183; K197]	FALSE		0.00349519	0	1	1	7	Q14103	Q14103 [179-199]	0	2456.37	0	2.496	1.32	0.715466	104.48	0.737	100	2.496	-0.44	6.64	1.32	88.5	111.5	53.36	22.31	2	3	144		65.1	106.2	122.1	162.6	1		1	1	1	1	144		65.1	106.2	122.1
FALSE	High	[Y].EPVWAIGTGKTATPQQAQEVHEKLR.[G]	1xGlu->pyro-Glu [N-Term]; 2xAcetyl:2H(3) [K10; K23]	P60174 1xGlu->pyro-Glu [N-Term]; 2xAcetyl:2H(3) [K212; K225]	FALSE		0.00116513	0	1	1	20	P60174	P60174 [203-227]	0	2846.51	0	0.867	-0.21	0.998323	39.53	0.867	1.174	0.511	-0.21	0.23	-0.97	105.4	94.6	2.15	38.5	3	3	110.7	106.5	106.9	96	125.1	54.7	1	1	1	1	1	1	110.7	106.5	106.9	96	125.1
FALSE	High	[T].EQAALAAVDYINKHLPR.[G]	1xGlu->pyro-Glu [N-Term]; 1xAcetyl:2H(3) [K13]	P12763 1xGlu->pyro-Glu [N-Term]; 1xAcetyl:2H(3) [K50]	TRUE	FBS	1.46533e-05	0	1	1	108	P12763	P12763 [38-54]	0	1936.05	0	0.979	-0.03	0.988733	16.34	1.599	0.866	0.979	0.68	-0.21	-0.03	101.1	98.9	29.63	64.68	3	3	119.9	69.2	80.5	191.7	60	78.8	1	1	1	1	1	1	119.9	69.2	80.5	191.7	60
FALSE	High	[Q].EQAGKNLGTTKKGIGPVYSSKAAR.[S]	1xGlu->pyro-Glu [N-Term]; 4xAcetyl:2H(3) [K5; K11; K12; K21]	P30520 1xGlu->pyro-Glu [N-Term]; 4xAcetyl:2H(3) [K157; K163; K164; K173]	FALSE		0.000733721	0	1	1	2	P30520	P30520 [153-176]	0	2623.46	0	2.081	1.06	0.908591	19.01	2.347	2.081	0.358	1.23	1.06	-1.48	73	127	22.75	63.17	3	3	78	65.2	101.8	183	135.6	36.5	1	1	1	1	1	1	78	65.2	101.8	183	135.6
FALSE	High	[C].EQALAAEPKAKDPFAHLPKSTFVLDEFKR.[K]	1xGlu->pyro-Glu [N-Term]; 4xAcetyl:2H(3) [K9; K11; K19; K28]	P26641 1xGlu->pyro-Glu [N-Term]; 4xAcetyl:2H(3) [K275; K277; K285; K294]	FALSE		0.00041546	0	1	1	21	P26641	P26641 [267-295]	0	3445.85	0	1.32	0.4	0.980687	127.43	0.185	3.091	1.32	-2.43	1.63	0.4	87.4	112.6	93	69.18	3	3	228.8	51.7	50.5	42.4	159.9	66.6	1	1	1	1	1	1	228.8	51.7	50.5	42.4	159.9
FALSE	High	[S].EQALADFAELIKHLKR.[T]	1xGlu->pyro-Glu [N-Term]; 2xAcetyl:2H(3) [K12; K15]	P42785 1xGlu->pyro-Glu [N-Term]; 2xAcetyl:2H(3) [K159; K162]	FALSE		3.45257e-05	0	1	1	12	P42785	P42785 [148-163]	0	1954.1	0	0.01	-6.64	1.64805e-16	0	0.01			-6.64			200				1		600						1						600
FALSE	High	[N].EQASEEILKVEQKYNKLR.[Q]	1xGlu->pyro-Glu [N-Term]; 3xAcetyl:2H(3) [K9; K13; K16]	Q01105 1xGlu->pyro-Glu [N-Term]; 3xAcetyl:2H(3) [K68; K72; K75]	FALSE		5.36028e-05	0	1	1	40	Q01105	Q01105 [60-77]	0	2322.26	0	0.932	-0.1	0.998323	1.54	0.698	0.932	0.943	-0.52	-0.1	-0.08	102.9	97.1	24.99	37.46	3	3	77.5	129.8	112	54.1	121	105.6	1	1	1	1	1	1	77.5	129.8	112	54.1	121
FALSE	High	[S].EQATEMLVHNAQNLMQSVKETVR.[E]	1xGlu->pyro-Glu [N-Term]; 1xAcetyl:2H(3) [K19]	P18206 1xGlu->pyro-Glu [N-Term]; 1xAcetyl:2H(3) [K1103]	FALSE		0.00103205	0	1	1	8	P18206	P18206 [1085-1107]	0	2683.34	0	1.251	0.32	0.991013	122.57	0.081	2.286	1.251	-3.63	1.19	0.32	88.8	111.2	28.96	80.24	3	3	130.3	72.3	98.5	10.5	165.1	123.3	1	1	1	1	1	1	130.3	72.3	98.5	10.5	165.1
FALSE	High	[R].EQAVEGGEVELSCLVPR.[S]	1xCarbamidomethyl [C13]	Q8NFZ8 1xCarbamidomethyl [C145]	FALSE		5.98765e-06	0	1	1	9	Q8NFZ8	Q8NFZ8 [133-149]	0	1871.92	0	1.262	0.34	0.968478	8.01	1.262	0.829	1.33	0.34	-0.27	0.41	90	110	27.02	7.57	3	3	76.9	125	84.8	97	103.7	112.7	1	1	1	1	1	1	76.9	125	84.8	97	103.7
FALSE	High	[Q].EQCCHSQLEELHCATGISLANEQDR.[C]	3xCarbamidomethyl [C3; C4; C13]; 1xGlu->pyro-Glu [N-Term]	P23142 3xCarbamidomethyl [C68; C69; C78]; 1xGlu->pyro-Glu [N-Term]	FALSE		3.23931e-06	0	1	1	4	P23142	P23142 [66-90]	0	2967.28	0	0.731	-0.45	0.955854	9.12	0.731	1.008	0.647	-0.45	0.01	-0.63	108.5	91.5	11.86	25.79	3	3	125.6	108.9	99.6	91.8	109.8	64.4	1	1	1	1	1	1	125.6	108.9	99.6	91.8	109.8
FALSE	High	[R].EQCCYNCGKPGHLAR.[D]	3xCarbamidomethyl [C3; C4; C7]; 1xGlu->pyro-Glu [N-Term]; 1xAcetyl:2H(3) [K9]	P62633 3xCarbamidomethyl [C97; C98; C101]; 1xGlu->pyro-Glu [N-Term]; 1xAcetyl:2H(3) [K103]	FALSE		0.000986154	0	1	1	5	P62633	P62633 [95-109]	0	1876.81	0	13.247	3.73	0.0521677	549.77	1.755	100		0.81	6.64		74.6	125.4		6.07	1	2	137.4			241.2	221.3		1			1	1		137.4			241.2	221.3
FALSE	High	[Y].EQDRPLKCDEPILSNR.[S]	1xCarbamidomethyl [C8]; 1xGlu->pyro-Glu [N-Term]; 1xAcetyl:2H(3) [K7]	P30086 1xCarbamidomethyl [C133]; 1xGlu->pyro-Glu [N-Term]; 1xAcetyl:2H(3) [K132]	FALSE		0.00333995	0	1	1	18	P30086	P30086 [126-141]	0	1996.99	0	0.706	-0.5	0.914729	3.04	2.121	0.706	0.677	1.08	-0.5	-0.56	108.9	91.1	43.49	85.85	3	3	101.8	120.5	45.8	215.8	85.1	31	1	1	1	1	1	1	101.8	120.5	45.8	215.8	85.1
FALSE	High	[Q].EQEVCFTEEGPALISKTR.[A]	1xCarbamidomethyl [C5]; 1xGlu->pyro-Glu [N-Term]; 1xAcetyl:2H(3) [K16]	Q3SZ57 1xCarbamidomethyl [C592]; 1xGlu->pyro-Glu [N-Term]; 1xAcetyl:2H(3) [K603]	TRUE	FBS	0.000238826	0	1	1	14	Q3SZ57	Q3SZ57 [588-605]	0	2121.04	0	0.619	-0.69	0.891226	12.01	1.998	0.619	0.488	1	-0.69	-1.04	113.8	86.2	36.67	50.61	3	3	73.7	96.4	149.9	147.3	59.6	73.1	1	1	1	1	1	1	73.7	96.4	149.9	147.3	59.6
FALSE	High	[G].EQGAEYQHFIQQCTDDVR.[L]	1xCarbamidomethyl [C13]; 1xGlu->pyro-Glu [N-Term]	Q14019 1xCarbamidomethyl [C52]; 1xGlu->pyro-Glu [N-Term]	FALSE		0.000107702	0	1	1	2	Q14019	Q14019 [40-57]	0	2205.96	0	2.763	1.47	0.667668	32.27	2.763	3.365	1.339	1.47	1.75	0.42	74.2	125.8	35.74	44.02	3	3	37.1	62.8	79.6	102.6	211.4	106.5	1	1	1	1	1	1	37.1	62.8	79.6	102.6	211.4
FALSE	High	[R].EQGFETKDIKEIAKKTQALPKMNSKR.[Q]	1xGlu->pyro-Glu [N-Term]; 6xAcetyl:2H(3) [K7; K10; K14; K15; K21; K25]	P55263 1xGlu->pyro-Glu [N-Term]; 6xAcetyl:2H(3) [K256; K259; K263; K264; K270; K274]	FALSE		0.00104781	0	1	1	8	P55263	P55263 [250-275]	0	3270.81	0	0.655	-0.61	0.93455	13.81	0.655	1.211	0.512	-0.61	0.28	-0.96	107.2	92.8	46.95	46.63	3	3	67.6	102.4	173	44.3	124	88.6	1	1	1	1	1	1	67.6	102.4	173	44.3	124
FALSE	High	[T].ERNEKKQQMGKEYR.[E]	1xGlu->pyro-Glu [N-Term]; 3xAcetyl:2H(3) [K5; K6; K11]	P31946 1xGlu->pyro-Glu [N-Term]; 3xAcetyl:2H(3) [K76; K77; K82]	FALSE		0.00120099	0	1	1	14	P31946	P31946 [72-85]	1	1941	0	1.361	0.44	0.975156	14.69	1.361	1.894	1.226	0.44	0.92	0.29	69.1	130.9	64.32	57.62	3	3	142.3	53.2	49.5	193.6	100.7	60.7	1	1	1	1	1	1	142.3	53.2	49.5	193.6	100.7
FALSE	High	[A].ERYDDMAAAMKAVTEQGHELSNEER.[N]	1xGlu->pyro-Glu [N-Term]; 1xAcetyl:2H(3) [K11]	P31946 1xGlu->pyro-Glu [N-Term]; 1xAcetyl:2H(3) [K29]	FALSE		2.4282e-06	0	1	1	4	P31946	P31946 [19-43]	1	2907.31	0	1.905	0.93	0.936881	8.01	2.008	1.905	0.455	1.01	0.93	-1.13	79.4	120.6	30.93	75.68	3	3	107	58.8	73.8	214.9	112	33.6	1	1	1	1	1	1	107	58.8	73.8	214.9	112
FALSE	High	[S].ESAAVKEILKEQENR.[K]	1xGlu->pyro-Glu [N-Term]; 2xAcetyl:2H(3) [K6; K10]	Q99497 1xGlu->pyro-Glu [N-Term]; 2xAcetyl:2H(3) [K89; K93]	FALSE		0.000190224	0	1	1	40	Q99497	Q99497 [84-98]	0	1815.97	0	1.313	0.39	0.890938	14.4	1.099	1.313	1.441	0.14	0.39	0.53	86.5	113.5	24.71	37.17	3	3	70	79	110.7	76.9	103.8	159.5	1	1	1	1	1	1	70	79	110.7	76.9	103.8
FALSE	High	[R].ESAKVLRPGSSASLTCVAPLSGVDFQLR.[R]	1xCarbamidomethyl [C16]; 1xAcetyl:2H(3) [K4]	Q2KJF1 1xCarbamidomethyl [C235]; 1xAcetyl:2H(3) [K223]	TRUE	FBS	2.2578e-05	0	1	1	6	Q2KJF1	Q2KJF1 [220-247]	0	2990.58	0	1.108	0.15	0.993103	21.99	1.377	1.108	0.944	0.46	0.15	-0.08	101.3	98.7	9.99	26.57	3	3	101.5	83.1	94.4	139.8	92.1	89.1	1	1	1	1	1	1	101.5	83.1	94.4	139.8	92.1
FALSE	High	[A].ETAAKHGEAQVKIWR.[R]	1xGlu->pyro-Glu [N-Term]; 2xAcetyl:2H(3) [K5; K12]	P18669 1xGlu->pyro-Glu [N-Term]; 2xAcetyl:2H(3) [K106; K113]	FALSE		0.000277945	0	1	2	45	P18669	P18669 [102-116]	0	1795.97	0	0.922	-0.12	0.99284	41.51	0.922	1.226	0.48	-0.12	0.29	-1.06	104.1	95.9	17.04	28.92	3	3	110.1	90	127.1	101.5	110.3	61	1	1	1	1	1	1	110.1	90	127.1	101.5	110.3
FALSE	High	[T].ETAAQCNAVEHCKR.[H]	2xCarbamidomethyl [C6; C12]; 1xGlu->pyro-Glu [N-Term]; 1xAcetyl:2H(3) [K13]	P07602 2xCarbamidomethyl [C512; C518]; 1xGlu->pyro-Glu [N-Term]; 1xAcetyl:2H(3) [K519]	FALSE		0.00128578	0	1	1	7	P07602	P07602 [507-520]	0	1700.77	0	0.578	-0.79	0.857343	27.08	0.262	0.578	0.909	-1.93	-0.79	-0.14	113.8	86.2	69.33	25.56	3	3	247.1	79.2	85.5	64.8	45.8	77.7	1	1	1	1	1	1	247.1	79.2	85.5	64.8	45.8
FALSE	High	[L].ETAGGVMTALIKR.[N]	1xAcetyl:2H(3) [K12]	P0DMV9 1xAcetyl:2H(3) [K415]	FALSE		0.00371344	0	1	2	1	P0DMV9	P0DMV9 [404-416]	0	1391.78	0	0.948	-0.08	0.972143	115.8		2.08	0.432		1.06	-1.21	102.7	97.3	74.87	124.44	2	2		170.4	52.4		354.5	22.6		1	1		1	1		170.4	52.4		354.5
FALSE	High	[Y].ETALLSSGFSLEDPQTHANR.[I]	1xGlu->pyro-Glu [N-Term]	Q76LV2 1xGlu->pyro-Glu [N-Term]	TRUE	FBS	0.000229939	0	1	2	6	Q76LV2	Q76LV2 [669-688]	0	2155.04	0	2.146	1.1	0.908591	92.81	0.803	2.146	100	-0.32	1.1	6.64	93.8	106.2	79.89	55.49	2	3	207.5	57.7		166.6	123.8	44.5	1	1		1	1	1	207.5	57.7		166.6	123.8
FALSE	High	[F].ETALLSSGFSLEDPQTHSNR.[I]	1xGlu->pyro-Glu [N-Term]	P08238 1xGlu->pyro-Glu [N-Term]	FALSE		0.000739305	0	1	1	4	P08238	P08238 [660-679]	0	2171.04	0	1.04	0.06	0.983626	59.6	0.622	1.04	1.944	-0.68	0.06	0.96	78.5	121.5	61.16	24.9	3	3	171.6	68.9	61.4	106.8	71.7	119.5	1	1	1	1	1	1	171.6	68.9	61.4	106.8	71.7
FALSE	High	[Q].ETAVAPSLVAPALNKPKKPLTSSSAAPQRPISTQR.[T]	1xGlu->pyro-Glu [N-Term]; 3xAcetyl:2H(3) [K15; K17; K18]	Q15691 1xGlu->pyro-Glu [N-Term]; 3xAcetyl:2H(3) [K148; K150; K151]	FALSE		0.000779604	0	1	1	1	Q15691	Q15691 [134-168]	0	3729.1	0	100	6.64	1.64805e-16	0	1.59	100	100	0.67	6.64	6.64	111.7	88.3		46.27	1	3	146			232.1	115.3	106.7	1			1	1	1	146			232.1	115.3
FALSE	High	[G].ETCKGCAEKSDYIR.[K]	2xCarbamidomethyl [C3; C6]; 1xGlu->pyro-Glu [N-Term]; 2xAcetyl:2H(3) [K4; K9]	P55145 2xCarbamidomethyl [C151; C154]; 1xGlu->pyro-Glu [N-Term]; 2xAcetyl:2H(3) [K152; K157]	FALSE		0.00357549	0	1	1	3	P55145	P55145 [149-162]	0	1788.82	0	1.678	0.75	0.992688	4.07	1.678	1.724	1.345	0.75	0.79	0.43	73.4	126.6	50.81	57.43	3	3	99	96.1	31.2	166.1	165.7	42	1	1	1	1	1	1	99	96.1	31.2	166.1	165.7
FALSE	High	[R].ETDDTLVLSFVGQTR.[V]	1xGlu->pyro-Glu [N-Term]	Q16531 1xGlu->pyro-Glu [N-Term]	FALSE		0.00260137	0	1	1	5	Q16531	Q16531 [420-434]	0	1662.83	0	0.823	-0.28	0.940297	37.57	0.439	1.131	0.823	-1.19	0.18	-0.28	109.7	90.3	66.31	16.05	3	3	212.6	62.1	88.8	93.4	70.2	73	1	1	1	1	1	1	212.6	62.1	88.8	93.4	70.2
FALSE	High	[Q].ETDKIIEVEEEQEDPYLNDR.[C]	1xGlu->pyro-Glu [N-Term]; 1xAcetyl:2H(3) [K4]	P23142 1xGlu->pyro-Glu [N-Term]; 1xAcetyl:2H(3) [K163]	FALSE		1.88205e-05	0	1	1	2	P23142	P23142 [160-179]	0	2491.16	0	0.874	-0.19	0.948728	43.04	0.542	0.874	100	-0.88	-0.19	6.64	117	83	28.5	3.84	2	3	178.3	118.5		96.6	103.6	103	1	1		1	1	1	178.3	118.5		96.6	103.6
FALSE	High	[N].ETEPVTVASAGGDLHMTQFFR.[G]	1xGlu->pyro-Glu [N-Term]	O94985 1xGlu->pyro-Glu [N-Term]	FALSE		8.84266e-05	0	1	1	1	O94985	O94985 [516-536]	0	2275.08	0	0.406	-1.3	0.599482	23.86	0.406	0.01	0.909	-1.3	-6.64	-0.14	91.4	108.6	90.01	36.92	3	2	283.5	59.7	74.2	115.2		67.5	1	1	1	1		1	283.5	59.7	74.2	115.2
FALSE	High	[T].ETEVAPAKDVTLLKETER.[A]	1xGlu->pyro-Glu [N-Term]; 2xAcetyl:2H(3) [K8; K14]	P27816 1xGlu->pyro-Glu [N-Term]; 2xAcetyl:2H(3) [K346; K352]	FALSE		0.000611641	0	1	1	3	P27816	P27816 [339-356]	0	2101.13	0	12.016	3.59	0.0232701	608.01	1.444		100	0.53		6.64	96.7	103.3		41.31	1	2	185.5			267.8		146.7	1			1		1	185.5			267.8
FALSE	High	[S].ETFNHANGLTLVSR.[A]	1xGlu->pyro-Glu [N-Term]	P62714 1xGlu->pyro-Glu [N-Term]; P67775 1xGlu->pyro-Glu [N-Term]	FALSE		0.00455557	0	2	2	4	P62714; P67775	P62714 [226-239]; P67775 [226-239]	0	1540.79	0	1.607	0.68	0.947183	118	6.119	1.607	0.328	2.61	0.68	-1.61	76.7	123.3	89.71	35.29	3	3	21	76.4	189.2	128.7	122.7	62	1	1	1	1	1	1	21	76.4	189.2	128.7	122.7
FALSE	High	[F].ETGDAGASATFPMQCSALR.[K]	1xCarbamidomethyl [C15]; 1xGlu->pyro-Glu [N-Term]	P63241 1xCarbamidomethyl [C22]; 1xGlu->pyro-Glu [N-Term]	FALSE		0.00106382	0	1	2	21	P63241	P63241 [8-26]	0	1951.86	0	1.64	0.71	0.722306	35.19	1.64	2.029	1.134	0.71	1.02	0.18	75.8	124.2	16.5	43.25	3	3	69.1	90.1	67.8	113.3	182.7	76.9	1	1	1	1	1	1	69.1	90.1	67.8	113.3	182.7
FALSE	High	[C].ETGKQLALLKTNSAVR.[T]	1xGlu->pyro-Glu [N-Term]; 2xAcetyl:2H(3) [K4; K10]	Q13347 1xGlu->pyro-Glu [N-Term]; 2xAcetyl:2H(3) [K85; K91]	FALSE		0.000448194	0	1	1	11	Q13347	Q13347 [82-97]	0	1801.04	0	0.913	-0.13	0.986492	31.58	0.913	3.576	0.679	-0.13	1.84	-0.56	78.4	121.6	57.61	42.43	3	3	142.9	40.5	84.1	130.4	144.9	57.2	1	1	1	1	1	1	142.9	40.5	84.1	130.4	144.9
FALSE	High	[R].ETGTEHSPGVQPADVKEVVEKGVQTLVIGR.[G]	2xAcetyl:2H(3) [K16; K21]	Q9H7C9 2xAcetyl:2H(3) [K55; K60]	FALSE		0.000335973	0	1	1	9	Q9H7C9	Q9H7C9 [40-69]	0	3249.72	0	3.769	1.91	0.722027	27.12	100	3.08	3.769	6.64	1.62	1.91	57.8	142.2	56.95	76.51	2	3		91.3	38.9	42.1	281.2	146.5		1	1	1	1	1		91.3	38.9	42.1	281.2
FALSE	High	[N].ETHGHVGADLAALCSEAALQAIR.[K]	1xCarbamidomethyl [C14]; 1xGlu->pyro-Glu [N-Term]	P55072 1xCarbamidomethyl [C415]; 1xGlu->pyro-Glu [N-Term]	FALSE		0.000173675	0	1	1	5	P55072	P55072 [402-424]	0	2372.18	0	1.483	0.57	0.963859	40.98	1.073	1.483	2.739	0.1	0.57	1.45	53.5	146.5	75.44	45.11	3	3	149.6	39.4	51.3	160.5	58.5	140.6	1	1	1	1	1	1	149.6	39.4	51.3	160.5	58.5
FALSE	High	[G].ETKDQVANSAFVER.[L]	1xGlu->pyro-Glu [N-Term]; 1xAcetyl:2H(3) [K3]	Q76LV2 1xGlu->pyro-Glu [N-Term]; 1xAcetyl:2H(3) [K500]	TRUE	FBS	0.0010399	0	1	2	11	Q76LV2	Q76LV2 [498-511]	0	1620.81	0
FALSE	High	[A].ETKKNCHLNENIEKGLLHR.[A]	1xCarbamidomethyl [C6]; 1xGlu->pyro-Glu [N-Term]; 3xAcetyl:2H(3) [K3; K4; K14]	Q13907 1xCarbamidomethyl [C39]; 1xGlu->pyro-Glu [N-Term]; 3xAcetyl:2H(3) [K36; K37; K47]	FALSE		5.10605e-06	0	1	1	11	Q13907	Q13907 [34-52]	0	2450.29	0	0.862	-0.21	0.986008	21.64	0.862	6.226	0.693	-0.21	2.64	-0.53	49.8	150.2	78.86	83.64	3	3	136.3	38.8	39	117.6	241.3	27	1	1	1	1	1	1	136.3	38.8	39	117.6	241.3
FALSE	High	[R].ETLNISGPPLKAGKTR.[T]	2xAcetyl:2H(3) [K11; K14]	P28838 2xAcetyl:2H(3) [K79; K82]	FALSE		0.000406114	0	1	1	8	P28838	P28838 [69-84]	0	1772.02	0	1.255	0.33	0.986008	62.71	1.255	1.791	0.724	0.33	0.84	-0.47	98.7	101.3	40.8	45.38	3	3	54.4	91.2	129.2	68.3	163.3	93.6	1	1	1	1	1	1	54.4	91.2	129.2	68.3	163.3
FALSE	High	[RC].ETLQQHKLLKVIR.[K]	2xAcetyl:2H(3) [K7; K10]; 1xAcetyl:2H(3) [N-Term]	P14625 2xAcetyl:2H(3) [K455; K458]; 1xAcetyl:2H(3) [N-Term]	FALSE		0.00129556	0	1	2	3	P14625	P14625 [449-461]	0	1741.07	0	1.224	0.29	0.998323	19.04	0.7	1.224	1.382	-0.51	0.29	0.47	86.7	113.3	40.51	8.59	3	3	146.1	74.4	78.2	102.2	91.1	108.1	1	1	1	1	1	1	146.1	74.4	78.2	102.2	91.1
FALSE	High	[F].ETISQAMLNAVDR.[D]	1xGlu->pyro-Glu [N-Term]	P49720 1xGlu->pyro-Glu [N-Term]	FALSE		0.00397528	0	1	1	11	P49720	P49720 [165-177]	0	1429.71	0	1.581	0.66	0.909743	15.92	1.751	1.398	1.581	0.81	0.48	0.66	77.7	122.3	28.26	19.5	3	3	53.7	96.5	85.6	94.1	134.8	135.3	1	1	1	1	1	1	53.7	96.5	85.6	94.1	134.8
FALSE	High	[A].ETLSQLGQTLQSLKTR.[L]	1xGlu->pyro-Glu [N-Term]; 1xAcetyl:2H(3) [K14]	Q15818 1xGlu->pyro-Glu [N-Term]; 1xAcetyl:2H(3) [K141]	FALSE		0.000181761	0	1	1	7	Q15818	Q15818 [128-143]	0	1830.02	0	0.175	-2.51	0.0650936	1.98	0.175	0.099	0.415	-2.51	-3.34	-1.27	144.7	55.3	66.22	69.39	3	3	283.5	75.4	130	49.7	7.5	53.9	1	1	1	1	1	1	283.5	75.4	130	49.7	7.5
FALSE	High	[A].ETLYYAMKGAGTDDHTLIR.[V]	1xGlu->pyro-Glu [N-Term]; 1xAcetyl:2H(3) [K8]	P08758 1xGlu->pyro-Glu [N-Term]; 1xAcetyl:2H(3) [K260]	FALSE		0.00246703	0	1	1	6	P08758	P08758 [253-271]	0	2182.07	0	0.86	-0.22	0.981008	18.49	1.046	0.86	0.715	0.06	-0.22	-0.48	104.9	95.1	38.98	39.04	3	3	77.4	155.1	89.3	81	133.4	63.9	1	1	1	1	1	1	77.4	155.1	89.3	81	133.4
FALSE	High	[NH].ETMTGWVHDVLGR.[N]	1xGlu->pyro-Glu [N-Term]	P53634 1xGlu->pyro-Glu [N-Term]	TRUE	FBS	0.00336533	0	1	2	4	P53634	P53634 [120-132]	0	1482.72	0	0.427	-1.23	0.649197	1.83	0.301	0.427	0.455	-1.73	-1.23	-1.13	137.4	62.6	43.48	27.33	3	3	213	87.5	136	64.2	37.3	62	1	1	1	1	1	1	213	87.5	136	64.2	37.3
FALSE	High	[T].ETNGEFGKRPAEDMEEEQAFKR.[S]	1xGlu->pyro-Glu [N-Term]; 2xAcetyl:2H(3) [K8; K21]	P61978 1xGlu->pyro-Glu [N-Term]; 2xAcetyl:2H(3) [K21; K34]	FALSE		0.000434802	0	1	1	5	P61978	P61978 [14-35]	0	2670.24	0	1.29	0.37	0.986492	24.58	1.076	3.844	1.29	0.11	1.94	0.37	64.1	135.9	90.84	48.93	3	3	167.2	28.1	51	179.9	108.1	65.8	1	1	1	1	1	1	167.2	28.1	51	179.9	108.1
FALSE	High	[R].ETNLDSLPLVDTHSKR.[T]	1xGlu->pyro-Glu [N-Term]; 1xAcetyl:2H(3) [K15]	P08670 1xGlu->pyro-Glu [N-Term]; 1xAcetyl:2H(3) [K439]	FALSE		0.0013456	0	1	1	10	P08670	P08670 [425-440]	0	1851.96	0	2.559	1.36	0.665512	36.5	2.559	3.19	1.369	1.36	1.67	0.45	47.7	152.3	71.18	81.17	3	3	105.5	34.5	33.8	270.1	110	46.2	1	1	1	1	1	1	105.5	34.5	33.8	270.1	110
FALSE	High	[L].ETPGDENEHAHFQKAKER.[L]	1xGlu->pyro-Glu [N-Term]; 2xAcetyl:2H(3) [K14; K16]	P05067 1xGlu->pyro-Glu [N-Term]; 2xAcetyl:2H(3) [K393; K395]	FALSE		0.00235741	0	1	1	10	P05067	P05067 [380-397]	0	2195.04	0	1.214	0.28	0.980687	69.62	0.644	1.214	2.985	-0.63	0.28	1.58	77.2	122.8	58.62	45.05	3	3	147.3	59.7	56.6	94.9	72.5	169	1	1	1	1	1	1	147.3	59.7	56.6	94.9	72.5
FALSE	High	[L].ETPLCKNGFLLDGFPR.[T]	1xCarbamidomethyl [C5]; 1xGlu->pyro-Glu [N-Term]; 1xAcetyl:2H(3) [K6]	P54819 1xCarbamidomethyl [C92]; 1xGlu->pyro-Glu [N-Term]; 1xAcetyl:2H(3) [K93]	FALSE		0.000588884	0	1	1	2	P54819	P54819 [88-103]	0	1890.96	0	1.936	0.95	0.939152	28.22	1.936	3.734	1.568	0.95	1.9	0.65	46.8	153.2	49.59	56	3	3	90	53.3	32.6	174.2	198.9	51.1	1	1	1	1	1	1	90	53.3	32.6	174.2	198.9
FALSE	High	[G].ETPLFKQFFKNWR.[D]	1xGlu->pyro-Glu [N-Term]; 2xAcetyl:2H(3) [K6; K10]	P06396 1xGlu->pyro-Glu [N-Term]; 2xAcetyl:2H(3) [K390; K394]; F1N1I6 1xGlu->pyro-Glu [N-Term]; 2xAcetyl:2H(3) [K389; K393]	TRUE	FBS	0.00270177	0	2	2	4	P06396; F1N1I6	P06396 [385-397]; F1N1I6 [384-396]	0	1812.97	0	1.332	0.41	0.998323	37.93	0.096	1.673	1.332	-3.39	0.74	0.41	97.6	102.4	26.34	79.89	3	3	114.2	71.6	121.6	10.9	119.8	162	1	1	1	1	1	1	114.2	71.6	121.6	10.9	119.8
FALSE	High	[E].ESYKDSTLIMQLLR.[D]	1xGlu->pyro-Glu [N-Term]; 1xOxidation [M10]; 1xAcetyl:2H(3) [K4]	P63104 1xGlu->pyro-Glu [N-Term]; 1xOxidation [M218]; 1xAcetyl:2H(3) [K212]; P31946 1xGlu->pyro-Glu [N-Term]; 1xOxidation [M220]; 1xAcetyl:2H(3) [K214]; P62258 1xGlu->pyro-Glu [N-Term]; 1xOxidation [M221]; 1xAcetyl:2H(3) [K215]	FALSE		0.00289236	0	3	3	14	P63104; P31946; P62258	P63104 [209-222]; P31946 [211-224]; P62258 [212-225]	0	1739.91	0	0.78	-0.36	0.96318	44.59	0.395	3.745	0.78	-1.34	1.9	-0.36	120.6	79.4	73.69	15.78	3	3	187.2	22.8	129.7	73.9	85.3	101.1	1	1	1	1	1	1	187.2	22.8	129.7	73.9	85.3
FALSE	High	[K].EPCGGLEDAVNEAKHLGVKVFSVAITPDHLEPR.[L]	1xCarbamidomethyl [C3]; 1xGlu->pyro-Glu [N-Term]; 2xAcetyl:2H(3) [K14; K19]	P12109 1xCarbamidomethyl [C169]; 1xGlu->pyro-Glu [N-Term]; 2xAcetyl:2H(3) [K180; K185]	FALSE		1.5592e-07	0	1	1	2	P12109	P12109 [167-199]	0	3656.86	0
FALSE	High	[E].ESYKDSTLIMQLLR.[D]	1xGlu->pyro-Glu [N-Term]; 1xAcetyl:2H(3) [K4]	P63104 1xGlu->pyro-Glu [N-Term]; 1xAcetyl:2H(3) [K212]; P31946 1xGlu->pyro-Glu [N-Term]; 1xAcetyl:2H(3) [K214]; P62258 1xGlu->pyro-Glu [N-Term]; 1xAcetyl:2H(3) [K215]	FALSE		0.00170195	0	3	3	26	P63104; P31946; P62258	P63104 [209-222]; P31946 [211-224]; P62258 [212-225]	0	1723.91	0	1.265	0.34	0.924176	11.54	1.364	1.052	1.265	0.45	0.07	0.34	88.3	111.7	40.12	25.7	3	3	65.4	133.5	75.7	89.2	140.4	95.8	1	1	1	1	1	1	65.4	133.5	75.7	89.2	140.4
FALSE	High	[K].ESYDYLKTLAGDVHIVR.[G]	1xGlu->pyro-Glu [N-Term]; 1xAcetyl:2H(3) [K7]	Q9UBQ0 1xGlu->pyro-Glu [N-Term]; 1xAcetyl:2H(3) [K50]	FALSE		0.00026558	0	1	1	7	Q9UBQ0	Q9UBQ0 [44-60]	0	2006.04	0	1.21	0.28	0.999983	52.91	1.21	0.778	100	0.28	-0.36	6.64	114.3	85.7	62.91	48.47	2	3	79	205.7		95.6	160.1	59.5	1	1		1	1	1	79	205.7		95.6	160.1
FALSE	High	[G].ESCSVLMMYQESKFR.[Y]	1xCarbamidomethyl [C3]; 1xGlu->pyro-Glu [N-Term]; 1xAcetyl:2H(3) [K13]	F1MSZ6 1xCarbamidomethyl [C280]; 1xGlu->pyro-Glu [N-Term]; 1xAcetyl:2H(3) [K290]	TRUE	FBS	0.00196549	0	1	1	10	F1MSZ6	F1MSZ6 [278-292]	0	1921.87	0	0.674	-0.57	0.927269	43.38	3.239	0.674	0.24	1.7	-0.57	-2.06	119.5	80.5	45.9	71.68	3	3	51.9	118.7	146.1	168.2	80	35.1	1	1	1	1	1	1	51.9	118.7	146.1	168.2	80
FALSE	High	[A].ESDAGVYTCHAANLAGQR.[R]	1xCarbamidomethyl [C9]; 1xGlu->pyro-Glu [N-Term]	Q13308 1xCarbamidomethyl [C391]; 1xGlu->pyro-Glu [N-Term]	FALSE		0.00042181	0	1	1	2	Q13308	Q13308 [383-400]	0	1901.86	0	1.079	0.11	0.986001	5.6	1.038	1.913	1.079	0.05	0.94	0.11	72.3	127.7	40.78	31.17	3	3	70.1	64.6	129.4	72.7	123.7	139.5	1	1	1	1	1	1	70.1	64.6	129.4	72.7	123.7
FALSE	High	[Q].ESEIIYTDEKKDACGPLEKQHEEER.[K]	1xCarbamidomethyl [C14]; 1xGlu->pyro-Glu [N-Term]; 3xAcetyl:2H(3) [K10; K11; K19]	Q3SZR3 1xCarbamidomethyl [C184]; 1xGlu->pyro-Glu [N-Term]; 3xAcetyl:2H(3) [K180; K181; K189]	TRUE	FBS	0.00187814	0	1	1	6	Q3SZR3	Q3SZR3 [171-195]	0	3150.49	0	0.608	-0.72	0.882342	20.23	4.203	0.608	0.383	2.07	-0.72	-1.38	124.4	75.6	69.44	20.57	3	3	23.5	150.3	170.6	98.8	91.4	65.4	1	1	1	1	1	1	23.5	150.3	170.6	98.8	91.4
FALSE	High	[H].ESETTTSLVLER.[S]	1xAcetyl:2H(3) [N-Term]	Q04837 1xAcetyl:2H(3) [N-Term]	FALSE		0.00339091	0	1	1	40	Q04837	Q04837 [17-28]	0	1409.72	0	0.851	-0.23	0.997389	12.97	0.851	0.748	1.037	-0.23	-0.42	0.05	98.2	101.8	26.95	19.39	3	3	84.6	139.9	97.6	72	104.7	101.2	1	1	1	1	1	1	84.6	139.9	97.6	72	104.7
FALSE	High	[N].ESGDPSSKSTEIKWKSGKDLTKR.[S]	1xGlu->pyro-Glu [N-Term]; 5xAcetyl:2H(3) [K8; K13; K15; K18; K22]	Q01105 1xGlu->pyro-Glu [N-Term]; 5xAcetyl:2H(3) [K167; K172; K174; K177; K181]	FALSE		1.49905e-05	0	1	1	19	Q01105	Q01105 [160-182]	0	2771.47	0	0.64	-0.64	0.890756	22.75	0.64	1.303	0.4	-0.64	0.38	-1.32	115	85	40.69	35.14	3	3	94.4	87.4	174.3	60.4	113.9	69.7	1	1	1	1	1	1	94.4	87.4	174.3	60.4	113.9
FALSE	High	[E].ESGKPGAHVTVKKLFVGGIKEDTEEHHLR.[D]	1xGlu->pyro-Glu [N-Term]; 4xAcetyl:2H(3) [K4; K12; K13; K20]	P22626 1xGlu->pyro-Glu [N-Term]; 4xAcetyl:2H(3) [K104; K112; K113; K120]	FALSE		0.00216893	0	1	1	9	P22626	P22626 [101-129]	0	3360.81	0	1.246	0.32	0.99056	5.55	1.246	1.826	1.2	0.32	0.87	0.26	70.8	129.2	65.08	56.89	3	3	144.6	66.2	40.1	180.3	120.8	48.1	1	1	1	1	1	1	144.6	66.2	40.1	180.3	120.8
FALSE	High	[C].ESGIHNCLPDFICQNTLGSFR.[C]	2xCarbamidomethyl [C7; C13]; 1xGlu->pyro-Glu [N-Term]	F1MYN5 2xCarbamidomethyl [C276; C282]; 1xGlu->pyro-Glu [N-Term]; P23142 2xCarbamidomethyl [C273; C279]; 1xGlu->pyro-Glu [N-Term]	TRUE	FBS	0.00088685	0	2	2	1	F1MYN5; P23142	F1MYN5 [270-290]; P23142 [267-287]	0	2447.12	0	0.01	-6.64	1.64805e-16	0	0.474	0.01	0.01	-1.08	-6.64	-6.64	104.8	95.2	52.8		3	1	254.3	92.2	132.8	120.7			1	1	1	1			254.3	92.2	132.8	120.7
FALSE	High	[D].ESHAGCEKSLHTLFGDELCKVASLR.[E]	2xCarbamidomethyl [C6; C19]; 1xGlu->pyro-Glu [N-Term]; 2xAcetyl:2H(3) [K8; K20]	P02769 2xCarbamidomethyl [C86; C99]; 1xGlu->pyro-Glu [N-Term]; 2xAcetyl:2H(3) [K88; K100]	TRUE	FBS	5.03633e-08	0	1	1	33	P02769	P02769 [81-105]	0	2916.42	0	0.636	-0.65	0.91293	27.42	1.886	0.636	0.345	0.92	-0.65	-1.53	108.4	91.6	46.93	43.17	3	3	57.2	164.1	123.6	108	104.4	42.7	1	1	1	1	1	1	57.2	164.1	123.6	108	104.4
FALSE	High	[G].ESKEQVANSAFVER.[V]	1xGlu->pyro-Glu [N-Term]; 1xAcetyl:2H(3) [K3]	P08238 1xGlu->pyro-Glu [N-Term]; 1xAcetyl:2H(3) [K491]	FALSE		0.000286506	0	1	2	6	P08238	P08238 [489-502]	0	1620.81	3	2.214	1.15	0.651814	23.77	0.911	2.214	2.569	-0.13	1.15	1.36	56	144	77.54	23.13	3	3	153.5	39.6	50.2	139.8	87.7	129.1	1	1	1	1	1	1	153.5	39.6	50.2	139.8	87.7
FALSE	High	[E].ESKPKKKKEESEKPR.[G]	1xGlu->pyro-Glu [N-Term]; 6xAcetyl:2H(3) [K3; K5; K6; K7; K8; K13]	P83916 1xGlu->pyro-Glu [N-Term]; 6xAcetyl:2H(3) [K99; K101; K102; K103; K104; K109]	FALSE		0.00100884	0	1	1	30	P83916	P83916 [97-111]	0	2080.19	0	1.748	0.81	0.805518	72.44	0.611	2.603	1.748	-0.71	1.38	0.81	74.9	125.1	28.62	41.92	3	3	100.8	55.5	86.5	61.6	144.4	151.2	1	1	1	1	1	1	100.8	55.5	86.5	61.6	144.4
FALSE	High	[R].ESKPPDSSKDECMVKWCAIGHQER.[T]	2xCarbamidomethyl [C12; C17]; 1xGlu->pyro-Glu [N-Term]; 3xAcetyl:2H(3) [K3; K9; K15]	G3X6N3 2xCarbamidomethyl [C362; C367]; 1xGlu->pyro-Glu [N-Term]; 3xAcetyl:2H(3) [K353; K359; K365]; Q29443 2xCarbamidomethyl [C362; C367]; 1xGlu->pyro-Glu [N-Term]; 3xAcetyl:2H(3) [K353; K359; K365]	TRUE	FBS	0.00428789	0	2	2	23	G3X6N3; Q29443	G3X6N3 [351-374]; Q29443 [351-374]	0	2991.37	0	0.847	-0.24	0.995022	53.84	1.631	0.847	0.419	0.71	-0.24	-1.26	118.5	81.5	17.58	65.34	3	3	103.8	84.4	120.5	169.3	71.5	50.5	1	1	1	1	1	1	103.8	84.4	120.5	169.3	71.5
FALSE	High	[R].ESKPPDSSKDECMVKWCAIGHQER.[T]	2xCarbamidomethyl [C12; C17]; 1xGlu->pyro-Glu [N-Term]; 1xOxidation [M13]; 3xAcetyl:2H(3) [K3; K9; K15]	G3X6N3 2xCarbamidomethyl [C362; C367]; 1xGlu->pyro-Glu [N-Term]; 1xOxidation [M363]; 3xAcetyl:2H(3) [K353; K359; K365]; Q29443 2xCarbamidomethyl [C362; C367]; 1xGlu->pyro-Glu [N-Term]; 1xOxidation [M363]; 3xAcetyl:2H(3) [K353; K359; K365]	TRUE	FBS	0.000451606	0	2	2	21	G3X6N3; Q29443	G3X6N3 [351-374]; Q29443 [351-374]	0	3007.37	0	1.111	0.15	0.972143	56.53	1.535	0.54	1.111	0.62	-0.89	0.15	85.1	114.9	26.24	47.4	3	3	77.7	88.4	126.4	119.3	47.8	140.5	1	1	1	1	1	1	77.7	88.4	126.4	119.3	47.8
FALSE	High	[R].ESKPPDSSKDECMVKWCAIGHQER.[T]	2xCarbamidomethyl [C12; C17]; 3xAcetyl:2H(3) [K3; K9; K15]	G3X6N3 2xCarbamidomethyl [C362; C367]; 3xAcetyl:2H(3) [K353; K359; K365]; Q29443 2xCarbamidomethyl [C362; C367]; 3xAcetyl:2H(3) [K353; K359; K365]	TRUE	FBS	9.53942e-05	0	2	2	45	G3X6N3; Q29443	G3X6N3 [351-374]; Q29443 [351-374]	0	3009.38	0	0.98	-0.03	0.98859	65.97	2.049	0.526	0.98	1.04	-0.93	-0.03	101	99	39.58	39.44	3	3	71.6	144.1	81.8	146.7	75.7	80.1	1	1	1	1	1	1	71.6	144.1	81.8	146.7	75.7
FALSE	High	[R].ESKPPDSSKDECMVKWCAIGHQER.[T]	2xCarbamidomethyl [C12; C17]; 1xOxidation [M13]; 3xAcetyl:2H(3) [K3; K9; K15]	G3X6N3 2xCarbamidomethyl [C362; C367]; 1xOxidation [M363]; 3xAcetyl:2H(3) [K353; K359; K365]; Q29443 2xCarbamidomethyl [C362; C367]; 1xOxidation [M363]; 3xAcetyl:2H(3) [K353; K359; K365]	TRUE	FBS	0.00026558	0	2	2	13	G3X6N3; Q29443	G3X6N3 [351-374]; Q29443 [351-374]	0	3025.38	0	1.206	0.27	0.982054	36.63	1.206	0.588	1.503	0.27	-0.77	0.59	99	101	25.5	62.27	3	3	73.5	86.8	119.8	88.7	51	180.1	1	1	1	1	1	1	73.5	86.8	119.8	88.7	51
FALSE	High	[R].ESKPPDSSKDECMVKWCAIGHQER.[T]	2xCarbamidomethyl [C12; C17]; 3xAcetyl:2H(3) [K3; K9; K15]; 1xAcetyl:2H(3) [N-Term]	G3X6N3 2xCarbamidomethyl [C362; C367]; 3xAcetyl:2H(3) [K353; K359; K365]; 1xAcetyl:2H(3) [N-Term]; Q29443 2xCarbamidomethyl [C362; C367]; 3xAcetyl:2H(3) [K353; K359; K365]; 1xAcetyl:2H(3) [N-Term]	TRUE	FBS	0.000533601	0	2	2	13	G3X6N3; Q29443	G3X6N3 [351-374]; Q29443 [351-374]	0	3054.41	0	1.124	0.17	0.968478	20.71	2.081	1.124	0.967	1.06	0.17	-0.05	99.8	100.2	20.78	54.02	3	3	90.9	63.1	94.5	189.3	70.9	91.3	1	1	1	1	1	1	90.9	63.1	94.5	189.3	70.9
FALSE	High	[D].ESIHKLKEKAKKR.[K]	1xGlu->pyro-Glu [N-Term]; 5xAcetyl:2H(3) [K5; K7; K9; K11; K12]	Q9Y5S9 1xGlu->pyro-Glu [N-Term]; 5xAcetyl:2H(3) [K27; K29; K31; K33; K34]	FALSE		0.00042181	0	1	1	17	Q9Y5S9	Q9Y5S9 [23-35]	0	1802.11	0	1.31	0.39	0.975159	86.84	1.31	3.854	0.543	0.39	1.95	-0.88	74.2	125.8	17.14	80.24	3	3	84.9	62.4	65.6	111.2	240.4	35.6	1	1	1	1	1	1	84.9	62.4	65.6	111.2	240.4
FALSE	High	[K].ESILDLSKYIDKTIR.[V]	1xGlu->pyro-Glu [N-Term]; 2xAcetyl:2H(3) [K8; K12]	Q9UK45 1xGlu->pyro-Glu [N-Term]; 2xAcetyl:2H(3) [K17; K21]	FALSE		0.00023523	0	1	1	5	Q9UK45	Q9UK45 [10-24]	0	1866.05	0	3.952	1.98	0.666823	56.77	100	3.952	2.439	6.64	1.98	1.29	59.2	140.8	66.24	77.93	2	3		39.4	108.8	30.8	155.7	265.4		1	1	1	1	1		39.4	108.8	30.8	155.7
FALSE	High	[T].ESLQACKLAQANGWGVMVSHR.[S]	1xCarbamidomethyl [C6]; 1xGlu->pyro-Glu [N-Term]; 1xAcetyl:2H(3) [K7]	P06733 1xCarbamidomethyl [C357]; 1xGlu->pyro-Glu [N-Term]; 1xAcetyl:2H(3) [K358]	FALSE		1.46533e-05	0	1	1	26	P06733	P06733 [352-372]	0	2369.17	0	0.845	-0.24	0.99381	29.72	0.845	1.266	0.608	-0.24	0.34	-0.72	108.4	91.6	29.66	8.56	3	3	103	79.4	143.1	87	100.6	86.9	1	1	1	1	1	1	103	79.4	143.1	87	100.6
FALSE	High	[S].ESLVVCDVAEDLVEKLR.[K]	1xCarbamidomethyl [C6]; 1xGlu->pyro-Glu [N-Term]; 1xAcetyl:2H(3) [K15]	P60983 1xCarbamidomethyl [C8]; 1xGlu->pyro-Glu [N-Term]; 1xAcetyl:2H(3) [K17]	FALSE		3.98773e-05	0	1	1	6	P60983	P60983 [3-19]	0	2001.04	0	2.951	1.56	0.667764	42.13	2.951	2.113	7.527	1.56	1.08	2.91	38.7	161.3	94.11	47.28	3	3	30.7	107.2	17	90.6	226.4	128.1	1	1	1	1	1	1	30.7	107.2	17	90.6	226.4
FALSE	High	[T].ESNQEVANPEHYIKHPLQNR.[W]	1xGlu->pyro-Glu [N-Term]; 1xAcetyl:2H(3) [K14]	P06730 1xGlu->pyro-Glu [N-Term]; 1xAcetyl:2H(3) [K36]	FALSE		0.00382762	0	1	1	4	P06730	P06730 [23-42]	0	2430.2	0	1.089	0.12	0.992959	92.53	0.409	2.328	1.089	-1.29	1.22	0.12	69.4	130.6	98.1	30.32	3	3	240.6	45.6	52.3	98.5	106.1	57	1	1	1	1	1	1	240.6	45.6	52.3	98.5	106.1
FALSE	High	[S].ESQVKSLCEKAKEILTKESNVQEVR.[C]	1xCarbamidomethyl [C8]; 1xGlu->pyro-Glu [N-Term]; 4xAcetyl:2H(3) [K5; K10; K12; K17]	P67775 1xCarbamidomethyl [C32]; 1xGlu->pyro-Glu [N-Term]; 4xAcetyl:2H(3) [K29; K34; K36; K41]	FALSE		0.000575639	0	1	1	7	P67775	P67775 [25-49]	0	3094.65	0	0.815	-0.3	0.972143	3.11	0.841	0.815	0.396	-0.25	-0.3	-1.34	131.7	68.3	27.43	41.88	3	3	82.5	144	133.8	69.4	117.3	53	1	1	1	1	1	1	82.5	144	133.8	69.4	117.3
FALSE	High	[R].ESSLLNQHICAVMGKFGPR.[T]	1xCarbamidomethyl [C10]; 1xGlu->pyro-Glu [N-Term]; 1xAcetyl:2H(3) [K15]	Q3SZ57 1xCarbamidomethyl [C224]; 1xGlu->pyro-Glu [N-Term]; 1xAcetyl:2H(3) [K229]	TRUE	FBS	1.49905e-05	0	1	1	32	Q3SZ57	Q3SZ57 [215-233]	0	2171.09	0	0.661	-0.6	0.92424	8.31	2.128	0.661	0.576	1.09	-0.6	-0.8	120.4	79.6	19.26	55.52	3	3	77.4	110	111.2	164.7	72.7	64	1	1	1	1	1	1	77.4	110	111.2	164.7	72.7
FALSE	High	[R].ESSLLNQHICAVMGKFGPR.[T]	1xCarbamidomethyl [C10]; 1xAcetyl:2H(3) [K15]	Q3SZ57 1xCarbamidomethyl [C224]; 1xAcetyl:2H(3) [K229]	TRUE	FBS	4.07951e-05	0	1	1	13	Q3SZ57	Q3SZ57 [215-233]	0	2189.1	0	0.01	-6.64	1.64805e-16	0	1.059	0.01	0.01	0.08	-6.64	-6.64	92.1	107.9	6.59		3	1	155.9	140.8	138.2	165.1			1	1	1	1			155.9	140.8	138.2	165.1
FALSE	High	[R].ESSLLNQHICAVMGKFGPR.[T]	1xCarbamidomethyl [C10]; 1xAcetyl:2H(3) [K15]; 1xAcetyl:2H(3) [N-Term]	Q3SZ57 1xCarbamidomethyl [C224]; 1xAcetyl:2H(3) [K229]; 1xAcetyl:2H(3) [N-Term]	TRUE	FBS	0.000299845	0	1	1	2	Q3SZ57	Q3SZ57 [215-233]	0	2234.13	0	0.601	-0.73	0.860309	4.76	0.655	0.01	0.601	-0.61	-6.64	-0.73	154.9	45.1	66.13	87.7	3	2	40	236.1	185.9	26.2		111.8	1	1	1	1		1	40	236.1	185.9	26.2
FALSE	High	[S].ESSTACLNAKGPQLTR.[E]	1xCarbamidomethyl [C6]; 1xGlu->pyro-Glu [N-Term]; 1xAcetyl:2H(3) [K10]	F1N5M2 1xCarbamidomethyl [C383]; 1xGlu->pyro-Glu [N-Term]; 1xAcetyl:2H(3) [K387]	TRUE	FBS	0.00223566	0	1	1	15	F1N5M2	F1N5M2 [378-393]	0	1759.88	0	0.55	-0.86	0.769751	3.68	2.658	0.505	0.55	1.41	-0.99	-0.86	122.8	77.2	44.06	46.78	3	3	54.5	145.6	117	144.9	73.5	64.4	1	1	1	1	1	1	54.5	145.6	117	144.9	73.5
FALSE	High	[R].ESTGAQVQVAGDMLPNSTER.[A]			FALSE		5.48364e-05	0	1	3	4	Q15366	Q15366 [125-144]	0	2089.98	0	6.153	2.62	0.257369	102.5	1.899	6.153	100	0.93	2.62	6.64	49.6	150.4	99.79	31.11	2	3	111.2	19.2		211.3	118.1	140.1	1	1		1	1	1	111.2	19.2		211.3	118.1
FALSE	High	[Q].ESTSVLLQQSEKKLGR.[S]	1xGlu->pyro-Glu [N-Term]; 2xAcetyl:2H(3) [K12; K13]	Q14126 1xGlu->pyro-Glu [N-Term]; 2xAcetyl:2H(3) [K561; K562]	FALSE		0.00422347	0	1	1	2	Q14126	Q14126 [550-565]	0	1875.05	0	100	6.64	1.64805e-16	0	0.944	100	100	-0.08	6.64	6.64	105.6	94.4		46.93	1	3	189.2			178.6	62.9	169.3	1			1	1	1	189.2			178.6	62.9
FALSE	High	[S].ESVDKVMDQKEHKLNGKVIDPKR.[A]	1xGlu->pyro-Glu [N-Term]; 5xAcetyl:2H(3) [K5; K10; K13; K17; K22]	Q14103 1xGlu->pyro-Glu [N-Term]; 5xAcetyl:2H(3) [K153; K158; K161; K165; K170]	FALSE		0.000483505	0	1	1	7	Q14103	Q14103 [149-171]	0	2900.58	0	1.985	0.99	0.73891	132.43	0.212	4.346	1.985	-2.24	2.12	0.99	74.8	125.2	52.95	69.04	3	3	119.8	34.7	90.1	25.4	151	178.9	1	1	1	1	1	1	119.8	34.7	90.1	25.4	151
FALSE	High	[Y].ESVNECMEGVCKMYEEHLKR.[M]	2xCarbamidomethyl [C6; C11]; 1xGlu->pyro-Glu [N-Term]; 2xAcetyl:2H(3) [K12; K19]	P84090 2xCarbamidomethyl [C28; C33]; 1xGlu->pyro-Glu [N-Term]; 2xAcetyl:2H(3) [K34; K41]	FALSE		0.000779604	0	1	1	3	P84090	P84090 [23-42]	0	2600.15	0	2.683	1.42	0.902461	154.09		1.081	6.657		0.11	2.73	54.3	145.7	110.65	20.04	2	2		199	24.3		215.1	161.7		1	1		1	1		199	24.3		215.1
FALSE	High	[E].ESYEVFKDLFDPIIEDR.[H]	1xGlu->pyro-Glu [N-Term]; 1xAcetyl:2H(3) [K7]	P12277 1xGlu->pyro-Glu [N-Term]; 1xAcetyl:2H(3) [K86]	FALSE		0.00252373	0	1	1	3	P12277	P12277 [80-96]	0	2142.05	0	1.248	0.32	0.986492	114.62	1.248	100	0.283	0.32	6.64	-1.82	105.2	94.8	44.55	82.77	2	3	75.8		145.6	94.6	242.8	41.2	1		1	1	1	1	75.8		145.6	94.6	242.8
FALSE	High	[S].EPCALCSLHSIGKIGGAQNR.[S]	2xCarbamidomethyl [C3; C6]; 1xGlu->pyro-Glu [N-Term]; 1xAcetyl:2H(3) [K13]	P14174 2xCarbamidomethyl [C57; C60]; 1xGlu->pyro-Glu [N-Term]; 1xAcetyl:2H(3) [K67]	FALSE		6.55818e-06	0	1	1	32	P14174	P14174 [55-74]	0	2195.09	0	1.185	0.25	0.984394	69.98	0.626	1.185	1.92	-0.68	0.25	0.94	69.9	130.1	37.28	57.49	3	3	60.3	124	79.1	37.8	147	151.8	1	1	1	1	1	1	60.3	124	79.1	37.8	147
FALSE	High	[A].EPAVYFKEQFLDGDGWTSR.[W]	1xAcetyl:2H(3) [K7]; 1xAcetyl:2H(3) [N-Term]	P27797 1xAcetyl:2H(3) [K24]; 1xAcetyl:2H(3) [N-Term]	FALSE		1.08188e-05	0	1	1	138	P27797	P27797 [18-36]	0	2335.11	0	0.56	-0.84	0.812507	1.59	0.541	0.637	0.56	-0.89	-0.65	-0.84	128.2	71.8	27.52	36.72	3	3	97.4	164.5	115.9	52.7	104.7	64.9	1	1	1	1	1	1	97.4	164.5	115.9	52.7	104.7
FALSE	High	[K].EPACDDPDTEQAALAAVDYINKHLPR.[G]	1xCarbamidomethyl [C4]; 1xGlu->pyro-Glu [N-Term]; 1xAcetyl:2H(3) [K22]	P12763 1xCarbamidomethyl [C32]; 1xGlu->pyro-Glu [N-Term]; 1xAcetyl:2H(3) [K50]	TRUE	FBS	0.00068532	0	1	1	19	P12763	P12763 [29-54]	0	2936.39	0	1.281	0.36	0.919953	15.75	1.417	1.281	0.811	0.5	0.36	-0.3	109.6	90.4	49.07	69.06	3	3	138.9	51.9	80.5	196.9	66.4	65.3	1	1	1	1	1	1	138.9	51.9	80.5	196.9	66.4
FALSE	High	[E].ELNHEQESLEVDMAR.[L]	1xGlu->pyro-Glu [N-Term]	O94985 1xGlu->pyro-Glu [N-Term]	FALSE		0.00117399	0	1	1	10	O94985	O94985 [728-742]	0	1781.81	0	0.702	-0.51	0.93455	15.24	0.513	0.848	0.702	-0.96	-0.24	-0.51	124.6	75.4	50.5	37.99	3	3	170.1	52.6	144.3	87.2	44.6	101.3	1	1	1	1	1	1	170.1	52.6	144.3	87.2	44.6
FALSE	High	[E].ELNHEQESLEVDMAR.[L]	1xGlu->pyro-Glu [N-Term]; 1xOxidation [M13]	O94985 1xGlu->pyro-Glu [N-Term]; 1xOxidation [M740]	FALSE		0.0024116	0	1	1	4	O94985	O94985 [728-742]	0	1797.81	0	2.265	1.18	0.908243	130.35	0.274	100	2.265	-1.87	6.64	1.18	122.3	77.7	72.68	53.12	2	3	223.7		71.8	61.2	80.5	162.7	1		1	1	1	1	223.7		71.8	61.2	80.5
FALSE	High	[L].EINPDHPIVETLR.[Q]	1xGlu->pyro-Glu [N-Term]	P08238 1xGlu->pyro-Glu [N-Term]	FALSE		0.00148493	0	1	1	10	P08238	P08238 [627-639]	0	1514.8	0	1.69	0.76	0.855933	7.62	1.69	1.416	1.777	0.76	0.5	0.83	72	128	35.95	42.79	3	3	99	45.8	80.2	167.4	64.9	142.6	1	1	1	1	1	1	99	45.8	80.2	167.4	64.9
FALSE	High	[L].EINPDHSIIETLR.[Q]	1xGlu->pyro-Glu [N-Term]	Q76LV2 1xGlu->pyro-Glu [N-Term]	TRUE	FBS	0.00452122	0	1	2	4	Q76LV2	Q76LV2 [636-648]	0	1518.79	0	2.11	1.08	0.627056	87.88	0.859	5.979	2.11	-0.22	2.58	1.08	64.3	135.7	88.08	8.59	3	3	151.1	18.6	60.9	129.9	110.9	128.6	1	1	1	1	1	1	151.1	18.6	60.9	129.9	110.9
FALSE	High	[K].EIPEKYGLSDCCSR.[T]	2xCarbamidomethyl [C11; C12]; 1xGlu->pyro-Glu [N-Term]; 1xAcetyl:2H(3) [K5]	Q3SZ57 2xCarbamidomethyl [C113; C114]; 1xGlu->pyro-Glu [N-Term]; 1xAcetyl:2H(3) [K107]	TRUE	FBS	0.00412863	0	1	1	7	Q3SZ57	Q3SZ57 [103-116]	0	1740.78	0	0.101	-3.31	0.000509551	7.59		1.022	0.01		0.03	-6.64	103.2	96.8	12		2	1		187.1	221.7		191.2			1	1		1			187.1	221.7		191.2
FALSE	High	[M].ELPTEKEVALVKDVR.[W]	1xGlu->pyro-Glu [N-Term]; 2xAcetyl:2H(3) [K6; K12]	P27816 1xGlu->pyro-Glu [N-Term]; 2xAcetyl:2H(3) [K312; K318]	FALSE		0.00416	0	1	1	4	P27816	P27816 [307-321]	0	1798.02	0	10.297	3.36	0.0160775	712.26	1.06		100	0.08		6.64	110.9	89.1		38.35	1	2	224.9			238.4		136.7	1			1		1	224.9			238.4
FALSE	High	[D].ELPVLGLTKSGGSDR.[T]	1xGlu->pyro-Glu [N-Term]; 1xAcetyl:2H(3) [K9]	Q08380 1xGlu->pyro-Glu [N-Term]; 1xAcetyl:2H(3) [K508]	FALSE		0.00147372	0	1	1	9	Q08380	Q08380 [500-514]	0	1555.85	0	0.01	-6.64	1.64805e-16	0	0.197	0.01	0.01	-2.34	-6.64	-6.64	150.9	49.1	47.64		3	1	275.1	103.7	166.9	54.3			1	1	1	1			275.1	103.7	166.9	54.3
FALSE	High	[A].ELQAKHGDPGDAAQQEAKHR.[E]	1xGlu->pyro-Glu [N-Term]; 2xAcetyl:2H(3) [K5; K18]	O14737 1xGlu->pyro-Glu [N-Term]; 2xAcetyl:2H(3) [K20; K33]	FALSE		6.05187e-05	0	1	1	8	O14737	O14737 [16-35]	0	2258.12	0	2.362	1.24	0.882865	2.7	1.779	2.362	2.405	0.83	1.24	1.27	59.5	140.5	47.54	56.89	3	3	29.1	67.5	85.8	51.9	159.4	206.3	1	1	1	1	1	1	29.1	67.5	85.8	51.9	159.4
FALSE	High	[H].ELQANCYEEVKDR.[C]	1xCarbamidomethyl [C6]; 1xGlu->pyro-Glu [N-Term]; 1xAcetyl:2H(3) [K11]	P23528 1xCarbamidomethyl [C139]; 1xGlu->pyro-Glu [N-Term]; 1xAcetyl:2H(3) [K144]	FALSE		0.000545879	0	1	1	18	P23528	P23528 [134-146]	0	1680.77	0	1.327	0.41	0.955854	34.4	1.019	1.327	2.063	0.03	0.41	1.04	85.9	114.1	62.38	39.04	3	3	140	97	29.9	142.7	128.8	61.6	1	1	1	1	1	1	140	97	29.9	142.7	128.8
FALSE	High	[K].ELQDLALQGAKER.[A]	1xGlu->pyro-Glu [N-Term]; 1xAcetyl:2H(3) [K11]	P10645 1xGlu->pyro-Glu [N-Term]; 1xAcetyl:2H(3) [K88]	FALSE		0.00148493	0	1	1	2	P10645	P10645 [78-90]	0	1497.81	0	0.573	-0.8	0.849456	47.77	0.573	1.292	0.01	-0.8	0.37	-6.64	68.8	131.2	131.55	102.2	3	2	323.2	23.1	38.9	185.1	29.8		1	1	1	1	1		323.2	23.1	38.9	185.1	29.8
FALSE	High	[M].ELQDILAKTSAKLSR.[A]	1xGlu->pyro-Glu [N-Term]; 2xAcetyl:2H(3) [K8; K12]	Q99435 1xGlu->pyro-Glu [N-Term]; 2xAcetyl:2H(3) [K250; K254]	FALSE		0.00104781	0	1	1	3	Q99435	Q99435 [243-257]	0	1745.01	0	0.644	-0.64	0.879819	19.21	0.443	100	0.644	-1.18	6.64	-0.64	132.6	67.4	79.95	45.26	2	3	276.9		76.9	122.5	74.2	49.5	1		1	1	1	1	276.9		76.9	122.5	74.2
FALSE	High	[N].EIQDYLQQLTGAR.[T]	1xGlu->pyro-Glu [N-Term]	P35754 1xGlu->pyro-Glu [N-Term]	FALSE		0.00108007	0	1	1	3	P35754	P35754 [56-68]	0	1516.78	0	0.556	-0.85	0.684956	24.88		0.331	0.935		-1.59	-0.1	128.5	71.5	60.16	106.07	2	2		97.9	242.8		32.4	226.9		1	1		1	1		97.9	242.8		32.4
FALSE	High	[Q].EIQEEIDELLQEQR.[A]	1xGlu->pyro-Glu [N-Term]	Q06481 1xGlu->pyro-Glu [N-Term]	FALSE		0.000509866	0	1	1	4	Q06481	Q06481 [556-569]	0	1753.86	0	0.634	-0.66	0.91375	10.2	0.525	0.634	1.219	-0.93	-0.66	0.29	97.2	102.8	61.18	50.96	3	3	193.4	56.3	96	101.5	35.7	117.1	1	1	1	1	1	1	193.4	56.3	96	101.5	35.7
FALSE	High	[Q].EIQELDKDDESLR.[K]	1xGlu->pyro-Glu [N-Term]; 1xAcetyl:2H(3) [K7]	P52565 1xGlu->pyro-Glu [N-Term]; 1xAcetyl:2H(3) [K43]	FALSE		0.00354852	0	1	1	14	P52565	P52565 [37-49]	0	1616.78	0	0.692	-0.53	0.93455	12.75	0.692	1.895	0.567	-0.53	0.92	-0.82	118.2	81.8	28.44	34.97	3	3	119.9	70.3	123.5	82.9	133.2	70.1	1	1	1	1	1	1	119.9	70.3	123.5	82.9	133.2
FALSE	High	[M].ELQEIQLKEAKHIAEEADR.[K]	1xGlu->pyro-Glu [N-Term]; 2xAcetyl:2H(3) [K8; K11]	P06753 1xGlu->pyro-Glu [N-Term]; 2xAcetyl:2H(3) [K150; K153]	FALSE		0.000611641	0	1	1	1	P06753	P06753 [143-161]	0	2322.22	0
FALSE	High	[M].ELQEIQLKEAKHIAEEADRKYEEVAR.[K]	1xGlu->pyro-Glu [N-Term]; 3xAcetyl:2H(3) [K8; K11; K20]	P06753 1xGlu->pyro-Glu [N-Term]; 3xAcetyl:2H(3) [K150; K153; K162]	FALSE		0.000333435	0	1	1	5	P06753	P06753 [143-168]	1	3242.7	0	100	6.64	1.64805e-16	0	100	100	100	6.64	6.64	6.64		200		81.97		3				142.4	72.6	385				1	1	1				142.4	72.6
FALSE	High	[L].ELQGVKGGVDHAAAFGR.[I]	1xGlu->pyro-Glu [N-Term]; 1xAcetyl:2H(3) [K6]	Q9HC38 1xGlu->pyro-Glu [N-Term]; 1xAcetyl:2H(3) [K205]	FALSE		5.00659e-05	0	1	1	11	Q9HC38	Q9HC38 [200-216]	0	1738.91	0	0.571	-0.81	0.793258	18.06	0.571	0.784	0.3	-0.81	-0.35	-1.74	127.3	72.7	6.13	48.2	3	3	131.7	133.6	119.1	75.2	104.7	35.7	1	1	1	1	1	1	131.7	133.6	119.1	75.2	104.7
FALSE	High	[A].EIQHCLVNAGDVGCGVFECFENNSCEIR.[G]	4xCarbamidomethyl [C5; C14; C19; C25]; 1xGlu->pyro-Glu [N-Term]	O76061 4xCarbamidomethyl [C56; C65; C70; C76]; 1xGlu->pyro-Glu [N-Term]	FALSE		6.45945e-06	0	1	1	7	O76061	O76061 [52-79]	0	3295.4	0	0.661	-0.6	0.914729	9.26	0.567	0.661	0.79	-0.82	-0.6	-0.34	120.4	79.6	43.73	27.68	3	3	180.8	107.5	77.2	102.5	71.1	61	1	1	1	1	1	1	180.8	107.5	77.2	102.5	71.1
FALSE	High	[Q].ELQKHQETAEKTKR.[V]	1xGlu->pyro-Glu [N-Term]; 3xAcetyl:2H(3) [K4; K11; K13]	Q12841 1xGlu->pyro-Glu [N-Term]; 3xAcetyl:2H(3) [K292; K299; K301]	FALSE		0.000330915	0	1	1	43	Q12841	Q12841 [289-302]	0	1843	0	0.689	-0.54	0.92452	3.9	0.651	0.689	1.332	-0.62	-0.54	0.41	117.2	82.8	7.58	35.86	3	3	115.2	106	99	74.9	73	131.9	1	1	1	1	1	1	115.2	106	99	74.9	73
FALSE	High	[T].EIQKLVMDVAHIHEECCKGNVLECLQDGER.[V]	3xCarbamidomethyl [C16; C17; C24]; 1xGlu->pyro-Glu [N-Term]; 2xAcetyl:2H(3) [K4; K18]	Q3SZ57 3xCarbamidomethyl [C269; C270; C277]; 1xGlu->pyro-Glu [N-Term]; 2xAcetyl:2H(3) [K257; K271]	TRUE	FBS	5.16814e-07	0	1	1	16	Q3SZ57	Q3SZ57 [254-283]	0	3681.74	0	1.406	0.49	0.945978	74.75	2.801	1.406	0.697	1.49	0.49	-0.52	89	111	25.04	88.6	3	3	92.1	57.9	65.3	257.8	81.4	45.5	1	1	1	1	1	1	92.1	57.9	65.3	257.8	81.4
FALSE	High	[Q].EIQLKEAKHIAEEADR.[K]	1xGlu->pyro-Glu [N-Term]; 2xAcetyl:2H(3) [K5; K8]	P06753 1xGlu->pyro-Glu [N-Term]; 2xAcetyl:2H(3) [K150; K153]	FALSE		2.94422e-05	0	1	1	15	P06753	P06753 [146-161]	0	1952.04	0	1.602	0.68	0.882342	17.2	1.602	1.788	1.224	0.68	0.84	0.29	82.1	117.9	28.75	26.7	3	3	54.6	84.8	99.5	87.5	151.7	121.8	1	1	1	1	1	1	54.6	84.8	99.5	87.5	151.7
FALSE	High	[Q].EIQLKEAKHIAEEADRKYEEVAR.[K]	1xGlu->pyro-Glu [N-Term]; 3xAcetyl:2H(3) [K5; K8; K17]	P06753 1xGlu->pyro-Glu [N-Term]; 3xAcetyl:2H(3) [K150; K153; K162]	FALSE		0.000277945	0	1	1	19	P06753	P06753 [146-168]	1	2872.51	0	2.458	1.3	0.597101	80.55	3.795	1.123	2.458	1.92	0.17	1.3	76.8	123.2	35.87	55.34	3	3	60.1	82.8	39.3	228.2	93	96.5	1	1	1	1	1	1	60.1	82.8	39.3	228.2	93
FALSE	High	[A].EIQQKILHLPTSWDWR.[N]	1xGlu->pyro-Glu [N-Term]; 1xAcetyl:2H(3) [K5]	P53634 1xGlu->pyro-Glu [N-Term]; 1xAcetyl:2H(3) [K227]	FALSE		0.000701088	0	1	1	3	P53634	P53634 [223-238]	0	2077.11	0	0.177	-2.49	0.0901772	2.59	0.01	0.177	0.276	-6.64	-2.49	-1.86	167.1	32.9	15.73	14.82	3	2	199.1	183	145.3		32.5	40.1	1	1	1		1	1	199.1	183	145.3		32.5
FALSE	High	[R].ELSEALGQIFDSQR.[G]	1xGlu->pyro-Glu [N-Term]	Q08380 1xGlu->pyro-Glu [N-Term]	FALSE		0.00122862	0	1	1	18	Q08380	Q08380 [138-151]	0	1574.78	0	0.277	-1.85	0.0555966	6.78	0.112	0.517	0.277	-3.16	-0.95	-1.85	156.6	43.4	71.97	3.98	3	3	298.1	69.1	128.3	33.2	35.7	35.5	1	1	1	1	1	1	298.1	69.1	128.3	33.2	35.7
FALSE	High	[R].ELSEALGQIFDSQR.[G]			FALSE		0.000282193	0	1	1	16	Q08380	Q08380 [138-151]	0	1592.79	0	0.258	-1.96	0.0419905	5.02	0.073	0.258	0.389	-3.78	-1.96	-1.36	165.9	34.1	46.8	53.57	3	3	255.6	108.7	136.1	18.6	28	53	1	1	1	1	1	1	255.6	108.7	136.1	18.6	28
FALSE	High	[R].ELSEALGQIFDSQR.[G]	1xAcetyl:2H(3) [N-Term]	Q08380 1xAcetyl:2H(3) [N-Term]	FALSE		3.24931e-05	0	1	1	20	Q08380	Q08380 [138-151]	0	1637.82	0	0.209	-2.26	0.0270129	3.3	0.103	0.209	0.325	-3.29	-2.26	-1.62	164.2	35.8	48.51	23.4	3	3	264.2	124.2	119.7	27.1	26	38.9	1	1	1	1	1	1	264.2	124.2	119.7	27.1	26
FALSE	High	[R].ELSGTIKEILGTAQSVGCNVDGR.[H]	1xCarbamidomethyl [C18]; 1xGlu->pyro-Glu [N-Term]; 1xAcetyl:2H(3) [K7]	P30050 1xCarbamidomethyl [C141]; 1xGlu->pyro-Glu [N-Term]; 1xAcetyl:2H(3) [K130]	FALSE		0.00462505	0	1	1	9	P30050	P30050 [124-146]	0	2431.23	0	100	6.64	1.64805e-16	0	2.254	100	100	1.17	6.64	6.64	76.4	123.6		55.09	1	3	109.3			246.3	176.8	67.6	1			1	1	1	109.3			246.3	176.8
FALSE	High	[R].ELSGTIKEILGTAQSVGCNVDGR.[H]	1xCarbamidomethyl [C18]; 1xAcetyl:2H(3) [K7]	P30050 1xCarbamidomethyl [C141]; 1xAcetyl:2H(3) [K130]	FALSE		0.000106081	0	1	1	6	P30050	P30050 [124-146]	0	2449.24	0	100	6.64	1.64805e-16	0	4.698	100	100	2.23	6.64	6.64	65.3	134.7		55.18	1	3	62.4			293.1	128.6	115.9	1			1	1	1	62.4			293.1	128.6
FALSE	High	[H].EISKEHMQPTHPIR.[L]	1xGlu->pyro-Glu [N-Term]; 1xAcetyl:2H(3) [K4]	P61981 1xGlu->pyro-Glu [N-Term]; 1xAcetyl:2H(3) [K162]	FALSE		0.000791516	0	1	1	16	P61981	P61981 [159-172]	0	1729.89	0	1.146	0.2	0.981356	8.24	0.783	1.21	1.146	-0.35	0.28	0.2	112.1	87.9	41.96	54.01	3	3	99.7	137.1	55.5	78.1	166	63.6	1	1	1	1	1	1	99.7	137.1	55.5	78.1	166
FALSE	High	[S].EIIYTDEKKDACGPLEKQHEEER.[K]	1xCarbamidomethyl [C12]; 1xGlu->pyro-Glu [N-Term]; 3xAcetyl:2H(3) [K8; K9; K17]	Q3SZR3 1xCarbamidomethyl [C184]; 1xGlu->pyro-Glu [N-Term]; 3xAcetyl:2H(3) [K180; K181; K189]	TRUE	FBS	2.5491e-05	0	1	1	15	Q3SZR3	Q3SZR3 [173-195]	0	2934.41	0	0.611	-0.71	0.857343	16.91	4.677	0.611	0.424	2.23	-0.71	-1.24	124.2	75.8	69.86	19.36	3	3	22.4	145.9	166.9	104.9	89.1	70.7	1	1	1	1	1	1	22.4	145.9	166.9	104.9	89.1
FALSE	High	[F].EISKKEMQPTHPIR.[L]	1xGlu->pyro-Glu [N-Term]; 2xAcetyl:2H(3) [K4; K5]	P63104 1xGlu->pyro-Glu [N-Term]; 2xAcetyl:2H(3) [K157; K158]; P31946 1xGlu->pyro-Glu [N-Term]; 2xAcetyl:2H(3) [K159; K160]	FALSE		0.00207254	0	2	2	38	P63104; P31946	P63104 [154-167]; P31946 [156-169]	0	1765.95	0	0.849	-0.24	0.995813	4.03	1.085	0.849	0.817	0.12	-0.24	-0.29	107.2	92.8	13.38	3.67	3	3	88.9	114.8	111.4	96.5	97.4	91	1	1	1	1	1	1	88.9	114.8	111.4	96.5	97.4
FALSE	High	[G].EIIVTDMDTIEKSNLNR.[Q]	1xGlu->pyro-Glu [N-Term]; 1xAcetyl:2H(3) [K12]	P22314 1xGlu->pyro-Glu [N-Term]; 1xAcetyl:2H(3) [K510]	FALSE		0.000365205	0	1	1	5	P22314	P22314 [499-515]	0	2018.03	0	0.377	-1.41	0.599366	19.07	0.718	0.01	0.377	-0.48	-6.64	-1.41	107.9	92.1	70.07	95.38	3	2	238.1	69.4	88.3	171		33.2	1	1	1	1		1	238.1	69.4	88.3	171
FALSE	High	[R].ELISNSSDALDKIR.[Y]	1xAcetyl:2H(3) [K12]	Q76LV2 1xAcetyl:2H(3) [K58]	TRUE	FBS	0.000237021	0	1	2	6	Q76LV2	Q76LV2 [47-60]	0	1605.85	0	1.917	0.94	0.515473	121.78	0.342	1.917	5.074	-1.55	0.94	2.34	68.6	131.4	35.81	75.15	3	3	94.7	68.2	45.1	32.4	130.7	228.8	1	1	1	1	1	1	94.7	68.2	45.1	32.4	130.7
FALSE	High	[E].ELGMVQDVTFVDKAVCR.[N]	1xCarbamidomethyl [C16]; 1xGlu->pyro-Glu [N-Term]; 1xAcetyl:2H(3) [K13]	O43405 1xCarbamidomethyl [C323]; 1xGlu->pyro-Glu [N-Term]; 1xAcetyl:2H(3) [K320]	FALSE		0.00119192	0	1	1	1	O43405	O43405 [308-324]	0	1993.99	0	0.01	-6.64	1.64805e-16	0	0.01		0.01	-6.64		-6.64	200		123.04		2		561		39				1		1				561		39
FALSE	High	[E].EIGQLVKQMLDDFGPHR.[Y]	1xGlu->pyro-Glu [N-Term]; 1xAcetyl:2H(3) [K7]	P06132 1xGlu->pyro-Glu [N-Term]; 1xAcetyl:2H(3) [K322]	FALSE		0.000137287	0	1	1	1	P06132	P06132 [316-332]	0	2010.03	0	0.038	-4.71	0.000201883	0.38		0.145	0.01		-2.79	-6.64	173.1	26.9	9.54		2	1		297.2	259.7		43.1			1	1		1			297.2	259.7		43.1
FALSE	High	[E].ELHCATGISLANEQDR.[C]	1xCarbamidomethyl [C4]; 1xGlu->pyro-Glu [N-Term]	P23142 1xCarbamidomethyl [C78]; 1xGlu->pyro-Glu [N-Term]	FALSE		6.72982e-05	0	1	1	8	P23142	P23142 [75-90]	0	1795.84	0	0.884	-0.18	0.987505	43.58	0.552	0.884	1.632	-0.86	-0.18	0.71	105.3	94.7	36.45	31.3	3	3	113.8	137.2	62.7	62.7	121.3	102.3	1	1	1	1	1	1	113.8	137.2	62.7	62.7	121.3
FALSE	High	[H].ELHELGLLKDHSLEGR.[Y]	1xGlu->pyro-Glu [N-Term]; 1xAcetyl:2H(3) [K9]	Q16769 1xGlu->pyro-Glu [N-Term]; 1xAcetyl:2H(3) [K285]	FALSE		0.00167635	0	1	1	5	Q16769	Q16769 [277-292]	0	1873	0	0.18	-2.47	0.0826132	0.15	0.174	0.737	0.18	-2.52	-0.44	-2.47	162.5	37.5	24.15	68.76	3	3	190.6	118.6	144.1	33.2	87.5	26	1	1	1	1	1	1	190.6	118.6	144.1	33.2	87.5
FALSE	High	[C].ELKADKDYHFKVDNDENEHQLSLR.[T]	1xGlu->pyro-Glu [N-Term]; 3xAcetyl:2H(3) [K3; K6; K11]	P06748 1xGlu->pyro-Glu [N-Term]; 3xAcetyl:2H(3) [K24; K27; K32]	FALSE		1.33373e-06	0	1	1	12	P06748	P06748 [22-45]	0	3060.5	0	0.731	-0.45	0.94993	14.95	0.593	2.191	0.731	-0.75	1.13	-0.45	95.6	104.4	40.35	52.27	3	3	144.8	73	78.7	85.9	160	57.6	1	1	1	1	1	1	144.8	73	78.7	85.9	160
FALSE	High	[D].ELKEVFEDAAEIR.[L]	1xGlu->pyro-Glu [N-Term]; 1xAcetyl:2H(3) [K3]	P19338 1xGlu->pyro-Glu [N-Term]; 1xAcetyl:2H(3) [K410]	FALSE		0.00216893	0	1	1	8	P19338	P19338 [408-420]	0	1575.81	0	100	6.64	1.64805e-16	0	100	100	100	6.64	6.64	6.64		200		19.29		3				160.7	201.4	237.9				1	1	1				160.7	201.4
FALSE	High	[Y].ELKHALKGAGTNEKVLTEIIASR.[T]	1xGlu->pyro-Glu [N-Term]; 3xAcetyl:2H(3) [K3; K7; K14]	P08758 1xGlu->pyro-Glu [N-Term]; 3xAcetyl:2H(3) [K97; K101; K108]	FALSE		0.000142593	0	1	1	16	P08758	P08758 [95-117]	0	2595.48	0	0.838	-0.25	0.986008	5.05	0.838	0.798	0.889	-0.25	-0.33	-0.17	108.3	91.7	3.3	3.55	3	3	111.5	109.8	104.6	93.4	87.6	93	1	1	1	1	1	1	111.5	109.8	104.6	93.4	87.6
FALSE	High	[V].ELKKNEFQGELEKQR.[E]	1xGlu->pyro-Glu [N-Term]; 3xAcetyl:2H(3) [K3; K4; K13]	Q8NBJ4 1xGlu->pyro-Glu [N-Term]; 3xAcetyl:2H(3) [K66; K67; K76]	FALSE		0.00161402	0	1	1	1	Q8NBJ4	Q8NBJ4 [64-78]	0	1993.07	0	0.444	-1.17	0.571664	28.61	0.444	0.949	0.01	-1.17	-0.08	-6.64	113.6	86.4	47.19	9.17	3	2	214.8	88.3	117.7	95.4	83.8		1	1	1	1	1		214.8	88.3	117.7	95.4	83.8
FALSE	High	[N].EIKLEKPKGKDSKKER.[D]	1xGlu->pyro-Glu [N-Term]; 6xAcetyl:2H(3) [K3; K6; K8; K10; K13; K14]	P19338 1xGlu->pyro-Glu [N-Term]; 6xAcetyl:2H(3) [K377; K380; K382; K384; K387; K388]	FALSE		0.000221382	0	1	1	53	P19338	P19338 [375-390]	0	2165.28	0	1.213	0.28	0.92968	53.74	0.773	1.742	1.213	-0.37	0.8	0.28	95.4	104.6	45.42	13.79	3	3	137.9	51.2	97.2	106.6	89.2	117.9	1	1	1	1	1	1	137.9	51.2	97.2	106.6	89.2
FALSE	High	[CI].EIKINHEGEVNR.[A]	1xGlu->pyro-Glu [N-Term]; 1xAcetyl:2H(3) [K3]	Q16576 1xGlu->pyro-Glu [N-Term]; 1xAcetyl:2H(3) [K119]; Q09028 1xGlu->pyro-Glu [N-Term]; 1xAcetyl:2H(3) [K120]	FALSE		0.00462505	0	2	2	26	Q16576; Q09028	Q16576 [117-128]; Q09028 [118-129]	0	1464.76	0	0.546	-0.87	0.784205	5.81	0.474	0.981	0.546	-1.08	-0.03	-0.87	126.2	73.8	20.69	18.98	3	3	132.3	93.9	141.8	62.7	92.1	77.4	1	1	1	1	1	1	132.3	93.9	141.8	62.7	92.1
FALSE	High	[G].ELKLSKIQKNVKQNIR.[D]	1xGlu->pyro-Glu [N-Term]; 4xAcetyl:2H(3) [K3; K6; K9; K12]	F1MNW4 1xGlu->pyro-Glu [N-Term]; 4xAcetyl:2H(3) [K430; K433; K436; K439]	TRUE	FBS	0.000179025	0	1	1	7	F1MNW4	F1MNW4 [428-443]	0	2101.29	0	0.956	-0.07	0.997419	14.66	2.757	0.956	0.852	1.46	-0.07	-0.23	108	92	49.45	111.77	3	3	107.6	38.6	65	296.6	36.9	55.4	1	1	1	1	1	1	107.6	38.6	65	296.6	36.9
FALSE	High	[F].EIKMDASLGNLFAR.[S]	1xAcetyl:2H(3) [K3]; 1xAcetyl:2H(3) [N-Term]	Q92520 1xAcetyl:2H(3) [K30]; 1xAcetyl:2H(3) [N-Term]	FALSE		0.00466019	0	1	1	2	Q92520	Q92520 [28-41]	0	1654.87	0	1.425	0.51	0.996649	63.54	5.14	0.814	1.425	2.36	-0.3	0.51	105.3	94.7	65.83	31.19	3	3	19.7	113.9	112.5	101.1	92.7	160.2	1	1	1	1	1	1	19.7	113.9	112.5	101.1	92.7
FALSE	High	[Y].EIKMTKMYKGFQALGDAADIR.[F]	1xGlu->pyro-Glu [N-Term]; 3xAcetyl:2H(3) [K3; K6; K9]	P01033 1xGlu->pyro-Glu [N-Term]; 3xAcetyl:2H(3) [K64; K67; K70]	FALSE		0.000246182	0	1	1	26	P01033	P01033 [62-82]	0	2503.3	0	0.99	-0.01	0.999983	58.29	1.387	0.52	0.99	0.47	-0.94	-0.01	89.7	110.3	55.77	18.99	3	3	76.2	180.2	72.5	105.7	93.6	71.8	1	1	1	1	1	1	76.2	180.2	72.5	105.7	93.6
FALSE	High	[Q].EIKTLEEDEEELFKMR.[A]	1xGlu->pyro-Glu [N-Term]; 2xAcetyl:2H(3) [K3; K14]	P43487 1xGlu->pyro-Glu [N-Term]; 2xAcetyl:2H(3) [K39; K50]	FALSE		0.000137287	0	1	1	17	P43487	P43487 [37-52]	0	2111.05	0	1.521	0.61	0.935767	51.79	2.053	0.99	1.521	1.04	-0.01	0.61	80.4	119.6	22.94	14.87	3	3	61.7	98.9	85.2	126.7	97.9	129.6	1	1	1	1	1	1	61.7	98.9	85.2	126.7	97.9
FALSE	High	[Q].EIKTLEEDEEELFKMR.[A]	1xGlu->pyro-Glu [N-Term]; 1xOxidation [M15]; 2xAcetyl:2H(3) [K3; K14]	P43487 1xGlu->pyro-Glu [N-Term]; 1xOxidation [M51]; 2xAcetyl:2H(3) [K39; K50]	FALSE		0.00016099	0	1	1	2	P43487	P43487 [37-52]	0	2127.04	0	0.957	-0.06	0.972143	86.04	0.351	100	0.957	-1.51	6.64	-0.06	146.8	53.2	4.74	72.27	2	3	176		164.6	61.8	40.1	157.5	1		1	1	1	1	176		164.6	61.8	40.1
FALSE	High	[C].EIKVAQPKEVYQQQQYGSGGR.[G]	1xGlu->pyro-Glu [N-Term]; 2xAcetyl:2H(3) [K3; K8]	Q99729 1xGlu->pyro-Glu [N-Term]; 2xAcetyl:2H(3) [K227; K232]	FALSE		0.00204138	0	1	1	2	Q99729	Q99729 [225-245]	0	2465.27	0	0.664	-0.59	0.882342	64.32	0.01	1.741	0.664	-6.64	0.8	-0.59	94.4	105.6	65.49	58.85	3	2	23.6	127	137.3		221	91.1	1	1	1		1	1	23.6	127	137.3		221
FALSE	High	[T].EIKWKSGKDLTKR.[S]	1xGlu->pyro-Glu [N-Term]; 4xAcetyl:2H(3) [K3; K5; K8; K12]	Q01105 1xGlu->pyro-Glu [N-Term]; 4xAcetyl:2H(3) [K172; K174; K177; K181]	FALSE		0.00328975	0	1	1	20	Q01105	Q01105 [170-182]	0	1751.02	0	0.509	-0.97	0.709886	3.87	0.509	1.104	0.458	-0.97	0.14	-1.13	123.3	76.7	23.28	34.03	3	3	112.6	98.5	152.9	57.3	108.7	70	1	1	1	1	1	1	112.6	98.5	152.9	57.3	108.7
FALSE	High	[S].EILDKYFKNFDNGDSR.[L]	1xGlu->pyro-Glu [N-Term]; 2xAcetyl:2H(3) [K5; K8]	Q12841 1xGlu->pyro-Glu [N-Term]; 2xAcetyl:2H(3) [K151; K154]	FALSE		0.00252373	0	1	1	1	Q12841	Q12841 [147-162]	0	2032.99	0	0.814	-0.3	0.952069	23.57	0.619	1.251	0.814	-0.69	0.32	-0.3	119.1	80.9	38.11	14.83	3	3	140.6	62.3	128	87	78	104.1	1	1	1	1	1	1	140.6	62.3	128	87	78
FALSE	High	[R].ELLEIVKKNFDLRPGVIVR.[D]	1xGlu->pyro-Glu [N-Term]; 2xAcetyl:2H(3) [K7; K8]	P31153 1xGlu->pyro-Glu [N-Term]; 2xAcetyl:2H(3) [K350; K351]	FALSE		0.000231689	0	1	1	5	P31153	P31153 [344-362]	0	2310.38	0	1.62	0.7	0.967382	11.72	1.748	1.62	0.944	0.81	0.7	-0.08	76.3	123.7	3.21	27.73	3	3	79.6	82.6	84.9	139.1	133.8	80.1	1	1	1	1	1	1	79.6	82.6	84.9	139.1	133.8
FALSE	High	[F].ELLHKEMLGGEIIPR.[S]	1xGlu->pyro-Glu [N-Term]; 1xAcetyl:2H(3) [K5]	Q16531 1xGlu->pyro-Glu [N-Term]; 1xAcetyl:2H(3) [K579]	FALSE		9.61205e-05	0	1	1	2	Q16531	Q16531 [575-589]	0	1761.98	0	7.662	2.94	0.102099	961.86	0.587	100		-0.77	6.64		127.5	72.5		4.58	1	2	280.7			164.8	154.5		1			1	1		280.7			164.8	154.5
FALSE	High	[C].ELIKESEVKALCAKAR.[E]	1xCarbamidomethyl [C12]; 1xGlu->pyro-Glu [N-Term]; 3xAcetyl:2H(3) [K4; K9; K14]	P60510 1xCarbamidomethyl [C29]; 1xGlu->pyro-Glu [N-Term]; 3xAcetyl:2H(3) [K21; K26; K31]	FALSE		0.00422347	0	1	1	4	P60510	P60510 [18-33]	0	1962.1	0	0.663	-0.59	0.915485	7.39	0.584	0.663	0.738	-0.78	-0.59	-0.44	120.3	79.7	29.31	17.46	3	3	161	111.3	92	94	73.7	67.9	1	1	1	1	1	1	161	111.3	92	94	73.7
FALSE	High	[E].EILKVEQKYNKLR.[Q]	1xGlu->pyro-Glu [N-Term]; 3xAcetyl:2H(3) [K4; K8; K11]	Q01105 1xGlu->pyro-Glu [N-Term]; 3xAcetyl:2H(3) [K68; K72; K75]	FALSE		0.00060702	0	1	2	16	Q01105	Q01105 [65-77]	0	1778.05	0	0.78	-0.36	0.976572	5.58	0.607	0.828	0.78	-0.72	-0.27	-0.36	112.4	87.6	24.97	38.17	3	3	83	139	119.5	50.4	115	93.1	1	1	1	1	1	1	83	139	119.5	50.4	115
FALSE	High	[L].ELINDWVAKKTNLR.[I]	1xGlu->pyro-Glu [N-Term]; 2xAcetyl:2H(3) [K9; K10]	E1BMJ0 1xGlu->pyro-Glu [N-Term]; 2xAcetyl:2H(3) [K242; K243]	TRUE	FBS	0.00321586	0	1	2	3	E1BMJ0	E1BMJ0 [234-247]	0	1772	0	1.759	0.82	0.982416	0	1.759			0.82			72.5	127.5			1	1	217.4			382.6			1			1			217.4			382.6
FALSE	High	[Q].ELLPAKDIEALFVSESKKTLTR.[K]	1xGlu->pyro-Glu [N-Term]; 3xAcetyl:2H(3) [K6; K17; K18]	P81187 1xGlu->pyro-Glu [N-Term]; 3xAcetyl:2H(3) [K626; K637; K638]	TRUE	FBS	0.00017633	0	1	1	3	P81187	P81187 [621-642]	0	2605.48	0
FALSE	High	[G].ELLQDNAKLVPVLSAKAAQASDLEKIHLDEKSFR.[W]	1xGlu->pyro-Glu [N-Term]; 4xAcetyl:2H(3) [K8; K16; K25; K31]	P37837 1xGlu->pyro-Glu [N-Term]; 4xAcetyl:2H(3) [K269; K277; K286; K292]	FALSE		0.000179025	0	1	1	15	P37837	P37837 [262-295]	0	3939.16	0	0.75	-0.42	0.961721	46.35	11.207	0.75	0.333	3.49	-0.42	-1.59	150.1	49.9	86.85	80.32	3	3	3.1	203.8	154.3	34.7	152.8	51.3	1	1	1	1	1	1	3.1	203.8	154.3	34.7	152.8
FALSE	High	[T].ELIQKAKLAEQAER.[Y]	1xGlu->pyro-Glu [N-Term]; 2xAcetyl:2H(3) [K5; K7]	P27348 1xGlu->pyro-Glu [N-Term]; 2xAcetyl:2H(3) [K9; K11]	FALSE		0.0013456	0	1	1	19	P27348	P27348 [5-18]	0	1698.97	0	1.23	0.3	0.92452	22.66	0.671	1.418	1.23	-0.58	0.5	0.3	103.7	96.3	23.39	31.55	3	3	107.8	70.7	111.6	72.3	100.2	137.3	1	1	1	1	1	1	107.8	70.7	111.6	72.3	100.2
FALSE	High	[RWQ].ELISNASDALDKIR.[LY]	1xGlu->pyro-Glu [N-Term]; 1xAcetyl:2H(3) [K12]	P14625 1xGlu->pyro-Glu [N-Term]; 1xAcetyl:2H(3) [K114]; P08238 1xGlu->pyro-Glu [N-Term]; 1xAcetyl:2H(3) [K53]; Q58FF6 1xGlu->pyro-Glu [N-Term]; 1xAcetyl:2H(3) [K29]	FALSE		0.00141892	0	3	5	6	P14625; P08238; Q58FF6	P14625 [103-116]; P08238 [42-55]; Q58FF6 [18-31]	0	1571.85	0	1.865	0.9	0.545511	82	0.758	2.897	1.865	-0.4	1.53	0.9	69.8	130.2	89.26	23.98	3	3	180.1	28.8	59.7	136.5	83.5	111.4	1	1	1	1	1	1	180.1	28.8	59.7	136.5	83.5
FALSE	High	[RWQ].ELISNASDALDKIR.[LY]	1xAcetyl:2H(3) [K12]	P14625 1xAcetyl:2H(3) [K114]; P08238 1xAcetyl:2H(3) [K53]; Q58FF6 1xAcetyl:2H(3) [K29]	FALSE		0.000116188	0	3	5	10	P14625; P08238; Q58FF6	P14625 [103-116]; P08238 [42-55]; Q58FF6 [18-31]	0	1589.86	0	3.339	1.74	0.039938	2.75	0.386	3.339	3.401	-1.37	1.74	1.77	56.3	143.7	98.32	33.93	3	3	189.7	33.4	43.7	73.2	111.5	148.5	1	1	1	1	1	1	189.7	33.4	43.7	73.2	111.5
FALSE	High	[RWQ].ELISNASDALDKIR.[LY]	1xAcetyl:2H(3) [K12]; 1xAcetyl:2H(3) [N-Term]	P14625 1xAcetyl:2H(3) [K114]; 1xAcetyl:2H(3) [N-Term]; P08238 1xAcetyl:2H(3) [K53]; 1xAcetyl:2H(3) [N-Term]; Q58FF6 1xAcetyl:2H(3) [K29]; 1xAcetyl:2H(3) [N-Term]	FALSE		0.000169768	0	3	5	6	P14625; P08238; Q58FF6	P14625 [103-116]; P08238 [42-55]; Q58FF6 [18-31]	0	1634.89	0	1.897	0.92	0.952053	50.93	0.574	2.549	1.897	-0.8	1.35	0.92	75.7	124.3	81.12	11.04	3	3	180.1	37.8	62.9	103.4	96.4	119.3	1	1	1	1	1	1	180.1	37.8	62.9	103.4	96.4
FALSE	High	[R].ELISNSSDALDKIR.[Y]	1xAcetyl:2H(3) [K12]; 1xAcetyl:2H(3) [N-Term]	Q76LV2 1xAcetyl:2H(3) [K58]; 1xAcetyl:2H(3) [N-Term]	TRUE	FBS	0.00140821	0	1	2	3	Q76LV2	Q76LV2 [47-60]	0	1650.88	0	2.772	1.47	0.80478	97.12	0.956	2.772	100	-0.06	1.47	6.64	83.9	116.1	85.26	19.95	2	3	167.6	41.5		160.3	115.1	115.4	1	1		1	1	1	167.6	41.5		160.3	115.1
FALSE	High	[G].ETQGTFGEGLLKEAHLPVIENKVCNR.[N]	1xCarbamidomethyl [C24]; 1xGlu->pyro-Glu [N-Term]; 2xAcetyl:2H(3) [K12; K22]	E1B726 1xCarbamidomethyl [C731]; 1xGlu->pyro-Glu [N-Term]; 2xAcetyl:2H(3) [K719; K729]	TRUE	FBS	0.000117964	0	1	2	3	E1B726	E1B726 [708-733]	0	3011.55	0	2.104	1.07	0.91385	0	2.104			1.07			64.4	135.6			1	1	193.3			406.7			1			1			193.3			406.7
FALSE	High	[G].EISPGMIKDCGATWVVLGHSER.[R]	1xCarbamidomethyl [C10]; 1xGlu->pyro-Glu [N-Term]; 1xAcetyl:2H(3) [K8]	P60174 1xCarbamidomethyl [C124]; 1xGlu->pyro-Glu [N-Term]; 1xAcetyl:2H(3) [K122]	FALSE		9.11504e-05	0	1	1	42	P60174	P60174 [115-136]	0	2469.21	0	0.761	-0.39	0.972143	16.81	1.501	0.761	0.612	0.59	-0.39	-0.71	80.2	119.8	54.92	54.88	3	3	85.1	166.9	57.9	127.7	127	35.4	1	1	1	1	1	1	85.1	166.9	57.9	127.7	127
FALSE	High	[L].ELSRPHGDTAKKPIIGILMQKCR.[N]	1xCarbamidomethyl [C22]; 1xGlu->pyro-Glu [N-Term]; 1xOxidation [M19]; 3xAcetyl:2H(3) [K11; K12; K21]	Q92820 1xCarbamidomethyl [C43]; 1xGlu->pyro-Glu [N-Term]; 1xOxidation [M40]; 3xAcetyl:2H(3) [K32; K33; K42]	FALSE		6.52872e-05	0	1	1	7	Q92820	Q92820 [22-44]	0	2781.52	0	0.01	-6.64	1.64805e-16	0	0.01			-6.64			200				1		600						1						600
FALSE	High	[T].ENDNTVLLDPPLIALDKDAPLR.[F]	1xGlu->pyro-Glu [N-Term]; 1xAcetyl:2H(3) [K17]	O94985 1xGlu->pyro-Glu [N-Term]; 1xAcetyl:2H(3) [K64]	FALSE		0.000162216	0	1	1	20	O94985	O94985 [48-69]	0	2459.32	0	0.896	-0.16	0.998323	62.98	0.422	0.896	1.408	-1.24	-0.16	0.49	83.1	116.9	93.82	37.41	3	3	252.8	53.6	57.6	106.8	48.1	81.1	1	1	1	1	1	1	252.8	53.6	57.6	106.8	48.1
FALSE	High	[D].ENEHAHFQKAKER.[L]	1xGlu->pyro-Glu [N-Term]; 2xAcetyl:2H(3) [K9; K11]	P05067 1xGlu->pyro-Glu [N-Term]; 2xAcetyl:2H(3) [K393; K395]	FALSE		0.00133544	0	1	1	22	P05067	P05067 [385-397]	0	1695.85	0	0.992	-0.01	0.999983	49.96	0.652	0.992	2.696	-0.62	-0.01	1.43	92	108	37.21	58.4	3	3	125.4	68.2	69.6	81.7	67.6	187.6	1	1	1	1	1	1	125.4	68.2	69.6	81.7	67.6
FALSE	High	[L].ENEKDLEEAEEYKEAR.[L]	1xGlu->pyro-Glu [N-Term]; 2xAcetyl:2H(3) [K4; K13]	O75347 1xGlu->pyro-Glu [N-Term]; 2xAcetyl:2H(3) [K86; K95]	FALSE		0.000935186	0	1	1	8	O75347	O75347 [83-98]	0	2053.95	0	1.673	0.74	0.975159	23.68	1.673	2.823	1.406	0.74	1.5	0.49	63.3	136.7	31.17	32	3	3	52.9	61	93.7	88.5	172.2	131.7	1	1	1	1	1	1	52.9	61	93.7	88.5	172.2
FALSE	High	[N].ENEVGVAIQEKLR.[E]	1xGlu->pyro-Glu [N-Term]; 1xAcetyl:2H(3) [K11]	P15121 1xGlu->pyro-Glu [N-Term]; 1xAcetyl:2H(3) [K62]	FALSE		0.00223566	0	1	1	18	P15121	P15121 [52-64]	0	1511.83	0	0.59	-0.76	0.835714	19.9	0.59	1.18	0.362	-0.76	0.24	-1.46	121.6	78.4	7.1	58.49	3	3	125.8	115.1	109.5	74.2	135.8	39.7	1	1	1	1	1	1	125.8	115.1	109.5	74.2	135.8
FALSE	High	[A].ENFCVCHLATGDMLR.[A]	2xCarbamidomethyl [C4; C6]; 1xGlu->pyro-Glu [N-Term]	P54819 2xCarbamidomethyl [C40; C42]; 1xGlu->pyro-Glu [N-Term]	FALSE		0.000675006	0	1	1	7	P54819	P54819 [37-51]	0	1804.79	0	0.821	-0.29	0.975159	24.21	0.821	6.341	0.622	-0.29	2.66	-0.69	61.6	138.4	75.07	77.53	3	3	141.3	35.3	51.6	116	223.7	32.1	1	1	1	1	1	1	141.3	35.3	51.6	116	223.7
FALSE	High	[K].ENFEVLCKDGTR.[K]	1xCarbamidomethyl [C7]; 1xGlu->pyro-Glu [N-Term]; 1xAcetyl:2H(3) [K8]	G3X6N3 1xCarbamidomethyl [C589]; 1xGlu->pyro-Glu [N-Term]; 1xAcetyl:2H(3) [K590]; Q29443 1xCarbamidomethyl [C589]; 1xGlu->pyro-Glu [N-Term]; 1xAcetyl:2H(3) [K590]	TRUE	FBS	0.00349519	0	2	2	25	G3X6N3; Q29443	G3X6N3 [583-594]; Q29443 [583-594]	0	1494.71	0	0.612	-0.71	0.890756	9.88	1.319	0.612	0.503	0.4	-0.71	-0.99	126	74	4.41	58.82	3	3	114.7	105	109.5	151.3	64.3	55.1	1	1	1	1	1	1	114.7	105	109.5	151.3	64.3
FALSE	High	[K].ENFEVLCKDGTRKPVTDAENCHLAR.[G]	2xCarbamidomethyl [C7; C21]; 1xGlu->pyro-Glu [N-Term]; 2xAcetyl:2H(3) [K8; K13]	G3X6N3 2xCarbamidomethyl [C589; C603]; 1xGlu->pyro-Glu [N-Term]; 2xAcetyl:2H(3) [K590; K595]; Q29443 2xCarbamidomethyl [C589; C603]; 1xGlu->pyro-Glu [N-Term]; 2xAcetyl:2H(3) [K590; K595]	TRUE	FBS	4.46822e-05	0	2	2	2	G3X6N3; Q29443	G3X6N3 [583-607]; Q29443 [583-607]	1	3031.46	0	11.058	3.47	0.00359166	0	11.058			3.47			16.6	183.4			1	1	49.8			550.2			1			1			49.8			550.2
FALSE	High	[A].ENGKLVINGNPITIFQER.[D]	1xGlu->pyro-Glu [N-Term]; 1xAcetyl:2H(3) [K4]	P04406 1xGlu->pyro-Glu [N-Term]; 1xAcetyl:2H(3) [K66]	FALSE		4.85699e-05	0	1	1	20	P04406	P04406 [63-80]	0	2069.12	0	1.089	0.12	0.98486	32.71	0.849	1.738	1.089	-0.24	0.8	0.12	78.4	121.6	29.54	42.68	3	3	66.8	83.4	118.7	56.7	145	129.3	1	1	1	1	1	1	66.8	83.4	118.7	56.7	145
FALSE	High	[C].ENGLPVHLDQSIFR.[R]	1xGlu->pyro-Glu [N-Term]	P03950 1xGlu->pyro-Glu [N-Term]	FALSE		0.00215256	0	1	1	14	P03950	P03950 [132-145]	0	1606.83	0	0.996	-0.01	0.99284	14.91	0.996	0.895	1.375	-0.01	-0.16	0.46	97.7	102.3	5.93	18.14	3	3	101.5	96.7	90.2	101.2	86.5	123.9	1	1	1	1	1	1	101.5	96.7	90.2	101.2	86.5
FALSE	High	[W].ENHNAVFSAAGFKDIR.[S]	1xGlu->pyro-Glu [N-Term]; 1xAcetyl:2H(3) [K13]	P17174 1xGlu->pyro-Glu [N-Term]; 1xAcetyl:2H(3) [K154]	FALSE		0.000127259	0	1	1	1	P17174	P17174 [142-157]	0	1802.9	0
FALSE	High	[E].ENKGGEDKLKMIR.[E]	1xGlu->pyro-Glu [N-Term]; 1xOxidation [M11]; 3xAcetyl:2H(3) [K3; K8; K10]	P62258 1xGlu->pyro-Glu [N-Term]; 1xOxidation [M81]; 3xAcetyl:2H(3) [K73; K78; K80]	FALSE		0.00122862	0	1	1	38	P62258	P62258 [71-83]	0	1650.88	0	0.779	-0.36	0.957173	36.09	0.231	1.092	0.779	-2.11	0.13	-0.36	144	56	50.78	55.63	3	3	176.4	54.1	151.6	40.8	59	118.1	1	1	1	1	1	1	176.4	54.1	151.6	40.8	59
FALSE	High	[F].ENKKKKNNIKLYVR.[R]	1xGlu->pyro-Glu [N-Term]; 5xAcetyl:2H(3) [K3; K4; K5; K6; K10]	P08238 1xGlu->pyro-Glu [N-Term]; 5xAcetyl:2H(3) [K347; K348; K349; K350; K354]	FALSE		0.00363004	0	1	2	2	P08238	P08238 [345-358]	0	1982.2	0	1.888	0.92	0.905049	100.44	0.609	4.666	1.888	-0.72	2.22	0.92	69.3	130.7	100.07	7.23	3	3	193.8	22	56.5	118	102.8	106.8	1	1	1	1	1	1	193.8	22	56.5	118	102.8
FALSE	High	[R].ENKTAVVVGTITDDVR.[V]	1xAcetyl:2H(3) [K3]	Q07020 1xAcetyl:2H(3) [K78]	FALSE		0.0024116	0	1	1	5	Q07020	Q07020 [76-91]	0	1761.94	0	0.514	-0.96	0.698723	1.39	0.514	1.05	0.496	-0.96	0.07	-1.01	106.2	93.8	45.61	48.04	3	3	180.6	105.1	74.2	92.8	110.4	36.8	1	1	1	1	1	1	180.6	105.1	74.2	92.8	110.4
FALSE	High	[G].ENIAESLVAEGLATR.[R]	1xGlu->pyro-Glu [N-Term]	Q7KZF4 1xGlu->pyro-Glu [N-Term]	FALSE		0.00425556	0	1	1	4	Q7KZF4	Q7KZF4 [121-135]	0	1554.81	0	1.137	0.19	0.992688	19.47	0.886	1.286	1.137	-0.17	0.36	0.19	93.6	106.4	44.73	26.26	3	3	144.8	58.1	90.7	128.4	74.8	103.2	1	1	1	1	1	1	144.8	58.1	90.7	128.4	74.8
FALSE	High	[K].ENLKAAQEEYVKR.[A]	2xAcetyl:2H(3) [K4; K12]	P04075 2xAcetyl:2H(3) [K322; K330]	FALSE		0.00207254	0	1	1	8	P04075	P04075 [319-331]	0	1667.89	0	1.227	0.3	0.988196	147.05	0.01	1.227	3.91	-6.64	0.3	1.97	57.7	142.3	77.28	60.88	3	2	7.8	97.1	76.6		119.2	299.3	1	1	1		1	1	7.8	97.1	76.6		119.2
FALSE	High	[A].ENIKKKQEALVAR.[Y]	1xGlu->pyro-Glu [N-Term]; 3xAcetyl:2H(3) [K4; K5; K6]	Q13813 1xGlu->pyro-Glu [N-Term]; 3xAcetyl:2H(3) [K756; K757; K758]	FALSE		0.00360266	0	1	1	3	Q13813	Q13813 [753-765]	0	1643.98	0	100	6.64	1.64805e-16	0	1.266	100	100	0.34	6.64	6.64	112.2	87.8		45.02	1	3	168.7			213.5	85.7	132.1	1			1	1	1	168.7			213.5	85.7
FALSE	High	[C].ENIPIVLCGNKVDIKDR.[K]	1xCarbamidomethyl [C8]; 1xGlu->pyro-Glu [N-Term]; 2xAcetyl:2H(3) [K11; K15]	P62826 1xCarbamidomethyl [C120]; 1xGlu->pyro-Glu [N-Term]; 2xAcetyl:2H(3) [K123; K127]	FALSE		8.25921e-05	0	1	1	30	P62826	P62826 [113-129]	0	2055.12	0	1.568	0.65	0.723183	33.12	1.218	2.173	1.568	0.28	1.12	0.65	67.5	132.5	41.98	32.55	3	3	113.1	70.2	49.3	137.7	152.5	77.3	1	1	1	1	1	1	113.1	70.2	49.3	137.7	152.5
FALSE	High	[G].ENMNPDGMVALLDYR.[E]	1xGlu->pyro-Glu [N-Term]	P13693 1xGlu->pyro-Glu [N-Term]	FALSE		0.00115633	0	1	1	5	P13693	P13693 [138-152]	0	1719.78	0	1.757	0.81	0.92968	13.96	3.927	1.757	1.592	1.97	0.81	0.67	77.2	122.8	70.37	49.34	3	3	22.3	117.7	64	87.5	206.8	101.8	1	1	1	1	1	1	22.3	117.7	64	87.5	206.8
FALSE	High	[E].ENNNFSKMAEEKLTHKMEANKENR.[E]	1xGlu->pyro-Glu [N-Term]; 4xAcetyl:2H(3) [K7; K12; K16; K21]	P16949 1xGlu->pyro-Glu [N-Term]; 4xAcetyl:2H(3) [K95; K100; K104; K109]	FALSE		0.00365763	0	1	1	2	P16949	P16949 [89-112]	0	3054.48	0	2.659	1.41	0.909588	42.95	1.889	100	2.659	0.92	6.64	1.41	64.9	135.1	34.07	49.24	2	3	104.6		64	197.6	63.6	170.2	1		1	1	1	1	104.6		64	197.6	63.6
FALSE	High	[S].ENPSECQDKGEEELEKYIQESQALAKR.[S]	1xCarbamidomethyl [C6]; 1xGlu->pyro-Glu [N-Term]; 3xAcetyl:2H(3) [K9; K16; K26]	Q3SZ57 1xCarbamidomethyl [C394]; 1xGlu->pyro-Glu [N-Term]; 3xAcetyl:2H(3) [K397; K404; K414]	TRUE	FBS	1.23076e-05	0	1	1	19	Q3SZ57	Q3SZ57 [389-415]	0	3325.58	0	0.685	-0.55	0.937807	23.55	1.605	0.685	0.453	0.68	-0.55	-1.14	118.7	81.3	16.62	48.27	3	3	87.8	115.6	121.5	140.9	79.2	55.1	1	1	1	1	1	1	87.8	115.6	121.5	140.9	79.2
FALSE	High	[C].ENPTVDLFCCPECDPR.[L]	3xCarbamidomethyl [C9; C10; C13]; 1xGlu->pyro-Glu [N-Term]	Q99435 3xCarbamidomethyl [C688; C689; C692]; 1xGlu->pyro-Glu [N-Term]	FALSE		0.00112179	0	1	1	6	Q99435	Q99435 [680-695]	0	1990.81	0	1.436	0.52	0.99284	147.23	1.436	100	0.01	0.52	6.64	-6.64	92.5	107.5	57.96	80.59	2	2	184.7		77.3	265.3	72.7		1		1	1	1		184.7		77.3	265.3	72.7
FALSE	High	[R].ENPVYEKKPKKEVKKKR.[W]	1xGlu->pyro-Glu [N-Term]; 7xAcetyl:2H(3) [K7; K8; K10; K11; K14; K15; K16]	P46777 1xGlu->pyro-Glu [N-Term]; 7xAcetyl:2H(3) [K255; K256; K258; K259; K262; K263; K264]	FALSE		5.94241e-06	0	1	1	31	P46777	P46777 [249-265]	0	2425.46	0	0.606	-0.72	0.882342	4.76	0.552	1.616	0.606	-0.86	0.69	-0.72	101.9	98.1	36.78	44.14	3	3	155	82.7	89	85.7	133.7	53.9	1	1	1	1	1	1	155	82.7	89	85.7	133.7
FALSE	High	[R].ENPVYEKKPKKEVKKKR.[W]	7xAcetyl:2H(3) [K7; K8; K10; K11; K14; K15; K16]	P46777 7xAcetyl:2H(3) [K255; K256; K258; K259; K262; K263; K264]	FALSE		2.94422e-05	0	1	1	54	P46777	P46777 [249-265]	0	2443.47	0	1.349	0.43	0.868646	5.28	0.69	1.349	1.397	-0.53	0.43	0.48	97.4	102.6	21.23	25.59	3	3	114	98	73.8	78.7	132.2	103.2	1	1	1	1	1	1	114	98	73.8	78.7	132.2
FALSE	High	[R].ENPVYEKKPKKEVKKKR.[W]	7xAcetyl:2H(3) [K7; K8; K10; K11; K14; K15; K16]; 1xAcetyl:2H(3) [N-Term]	P46777 7xAcetyl:2H(3) [K255; K256; K258; K259; K262; K263; K264]; 1xAcetyl:2H(3) [N-Term]	FALSE		1.09842e-05	0	1	1	69	P46777	P46777 [249-265]	0	2488.5	0	0.871	-0.2	0.998323	37.02	0.545	1.158	0.871	-0.88	0.21	-0.2	99.9	100.1	54.33	16.18	3	3	185.1	72.7	84	100.8	84.2	73.2	1	1	1	1	1	1	185.1	72.7	84	100.8	84.2
FALSE	High	[L].ENQVSAFLEEICR.[E]	1xCarbamidomethyl [C12]; 1xGlu->pyro-Glu [N-Term]	Q3SZ57 1xCarbamidomethyl [C99]; 1xGlu->pyro-Glu [N-Term]	TRUE	FBS	0.000779604	0	1	1	22	Q3SZ57	Q3SZ57 [88-100]	0	1576.74	0	0.747	-0.42	0.961288	37.13	1.64	0.747	0.412	0.71	-0.42	-1.28	122	78	18.3	66.75	3	3	102.2	87.5	125.6	167.6	65.3	51.7	1	1	1	1	1	1	102.2	87.5	125.6	167.6	65.3
FALSE	High	[A].ENSLVAYKAASDIAMTELPPTHPIR.[L]	1xGlu->pyro-Glu [N-Term]; 1xAcetyl:2H(3) [K8]	P62258 1xGlu->pyro-Glu [N-Term]; 1xAcetyl:2H(3) [K153]	FALSE		3.0813e-05	0	1	1	66	P62258	P62258 [146-170]	0	2751.42	0	0.925	-0.11	0.995286	17.98	0.794	1.348	0.925	-0.33	0.43	-0.11	110.4	89.6	14.75	42.52	3	3	96	113	84.3	76.2	152.4	78	1	1	1	1	1	1	96	113	84.3	76.2	152.4
FALSE	High	[H].ENTAEEVAGGIEAIVQLINTR.[Q]	1xGlu->pyro-Glu [N-Term]	P68402 1xGlu->pyro-Glu [N-Term]	FALSE		5.63515e-06	0	1	1	6	P68402	P68402 [108-128]	0	2209.15	0	13.306	3.73	0.010914	547.27	100		1.77	6.64		0.82	97.9	102.1		68.62	1	2			177.3	108.8		313.9			1	1		1			177.3	108.8
FALSE	High	[S].ENTFTEYKKKLAER.[L]	1xGlu->pyro-Glu [N-Term]; 3xAcetyl:2H(3) [K8; K9; K10]	P02774 1xGlu->pyro-Glu [N-Term]; 3xAcetyl:2H(3) [K419; K420; K421]; F1N5M2 1xGlu->pyro-Glu [N-Term]; 3xAcetyl:2H(3) [K418; K419; K420]	TRUE	FBS	0.00174109	0	2	2	17	P02774; F1N5M2	P02774 [412-425]; F1N5M2 [411-424]	0	1874	0	0.696	-0.52	0.927269	33.04	2.076	0.696	0.376	1.05	-0.52	-1.41	117.9	82.1	31.11	66.34	3	3	80.7	92.2	142.1	167.5	64.1	53.4	1	1	1	1	1	1	80.7	92.2	142.1	167.5	64.1
FALSE	High	[G].ENYDIKKQAEILQESR.[M]	1xGlu->pyro-Glu [N-Term]; 2xAcetyl:2H(3) [K6; K7]	O75347 1xGlu->pyro-Glu [N-Term]; 2xAcetyl:2H(3) [K51; K52]	FALSE		0.000847411	0	1	1	6	O75347	O75347 [46-61]	0	2036.06	0	1.34	0.42	0.975159	31.92	2.218	1.34	1.051	1.15	0.42	0.07	85.5	114.5	57.28	25.52	3	3	39.4	81.4	137.8	87.4	109.1	144.9	1	1	1	1	1	1	39.4	81.4	137.8	87.4	109.1
FALSE	High	[A].ENAQKFKTKFEECR.[K]	1xCarbamidomethyl [C13]; 1xGlu->pyro-Glu [N-Term]; 3xAcetyl:2H(3) [K5; K7; K9]	P43487 1xCarbamidomethyl [C158]; 1xGlu->pyro-Glu [N-Term]; 3xAcetyl:2H(3) [K150; K152; K154]	FALSE		0.00201068	0	1	1	16	P43487	P43487 [146-159]	0	1931.96	0	0.617	-0.7	0.909588	21.82	0.617	1.662	0.379	-0.7	0.73	-1.4	108.5	91.5	32.43	49.9	3	3	150.1	77.3	109.8	92.6	128.6	41.6	1	1	1	1	1	1	150.1	77.3	109.8	92.6	128.6
FALSE	High	[L].ELSRPHGDTAKKPIIGILMQKCR.[N]	1xCarbamidomethyl [C22]; 1xGlu->pyro-Glu [N-Term]; 3xAcetyl:2H(3) [K11; K12; K21]	Q92820 1xCarbamidomethyl [C43]; 1xGlu->pyro-Glu [N-Term]; 3xAcetyl:2H(3) [K32; K33; K42]	FALSE		1.13736e-06	0	1	1	32	Q92820	Q92820 [22-44]	0	2765.53	0	0.455	-1.13	0.57757	3.3	0.455	0.407	0.574	-1.13	-1.3	-0.8	137.4	62.6	12.85	6.63	3	3	146.4	145.6	115.8	66.7	59.2	66.4	1	1	1	1	1	1	146.4	145.6	115.8	66.7	59.2
FALSE	High	[S].EMWQNDLQPLLIER.[Y]	1xGlu->pyro-Glu [N-Term]	Q16769 1xGlu->pyro-Glu [N-Term]	FALSE		0.00448712	0	1	1	8	Q16769	Q16769 [64-77]	0	1766.89	0	0.646	-0.63	0.901205	15.92	0.479	0.646	0.999	-1.06	-0.63	0	129.2	70.8	9.32	41.71	3	3	123.3	104.3	123	59.1	67.4	122.9	1	1	1	1	1	1	123.3	104.3	123	59.1	67.4
FALSE	High	[N].EMTLADCNLLPKLHIVKVVAKKYR.[N]	1xCarbamidomethyl [C7]; 1xGlu->pyro-Glu [N-Term]; 4xAcetyl:2H(3) [K12; K17; K21; K22]	Q9Y696 1xCarbamidomethyl [C189]; 1xGlu->pyro-Glu [N-Term]; 4xAcetyl:2H(3) [K194; K199; K203; K204]	FALSE		0.00216893	0	1	1	5	Q9Y696	Q9Y696 [183-206]	0	3001.71	0	100	6.64	1.64805e-16	0	100	2.835	100	6.64	1.5	6.64	52.2	147.8		39.64	1	3		71.4		229.3	202.3	97.1		1		1	1	1		71.4		229.3	202.3
FALSE	High	[L].ELSRPHGDTAKKPIIGILMQKCR.[N]	1xCarbamidomethyl [C22]; 3xAcetyl:2H(3) [K11; K12; K21]; 1xAcetyl:2H(3) [N-Term]	Q92820 1xCarbamidomethyl [C43]; 3xAcetyl:2H(3) [K32; K33; K42]; 1xAcetyl:2H(3) [N-Term]	FALSE		0.000425021	0	1	1	3	Q92820	Q92820 [22-44]	0	2828.57	0	0.16	-2.64	0.05214	0	0.16			-2.64			172.4	27.6			1	1	517.1			82.9			1			1			517.1			82.9
FALSE	High	[D].ELSSLLQVPLVAGTVNR.[G]	1xGlu->pyro-Glu [N-Term]	P56537 1xGlu->pyro-Glu [N-Term]	FALSE		0.00371344	0	1	1	18	P56537	P56537 [172-188]	0	1778.02	0	1.547	0.63	0.956803	35.64	1.033	1.919	1.547	0.05	0.94	0.63	77.5	122.5	26.96	13.16	3	3	108	70.5	68.6	111.5	135.3	106.2	1	1	1	1	1	1	108	70.5	68.6	111.5	135.3
FALSE	High	[Y].EISSVPTFLFFKNSQKIDR.[L]	1xGlu->pyro-Glu [N-Term]; 2xAcetyl:2H(3) [K12; K16]	O76003 1xGlu->pyro-Glu [N-Term]; 2xAcetyl:2H(3) [K92; K96]	FALSE		0.000379319	0	1	1	10	O76003	O76003 [81-99]	0	2328.25	0	0.919	-0.12	0.975159	18	0.919	0.787	1.316	-0.12	-0.35	0.4	100.2	99.8	24.58	30.28	3	3	76.2	125.4	99.1	70	98.8	130.4	1	1	1	1	1	1	76.2	125.4	99.1	70	98.8
FALSE	High	[N].ELTEFAKTCVADESHAGCEKSLHTLFGDELCKVASLR.[E]	3xCarbamidomethyl [C9; C18; C31]; 1xGlu->pyro-Glu [N-Term]; 3xAcetyl:2H(3) [K7; K20; K32]	P02769 3xCarbamidomethyl [C77; C86; C99]; 1xGlu->pyro-Glu [N-Term]; 3xAcetyl:2H(3) [K75; K88; K100]	TRUE	FBS	2.30265e-06	0	1	1	34	P02769	P02769 [69-105]	0	4326.08	0	0.841	-0.25	0.993103	44.77	1.378	0.841	0.482	0.46	-0.25	-1.05	101.5	98.5	52.56	55.63	3	3	63.1	172.2	89.6	87	144.9	43.2	1	1	1	1	1	1	63.1	172.2	89.6	87	144.9
FALSE	High	[D].ELTETLLVVHMPR.[F]	1xGlu->pyro-Glu [N-Term]	F1MSZ6 1xGlu->pyro-Glu [N-Term]	TRUE	FBS	0.00132536	0	1	1	2	F1MSZ6	F1MSZ6 [343-355]	0	1519.83	0	0.765	-0.39	0.971333	85.67	0.765	100	0.01	-0.39	6.64	-6.64	121	79	105.82	114.63	2	2	301.6		43.4	230.8	24.1		1		1	1	1		301.6		43.4	230.8	24.1
FALSE	High	[S].ELTGKFEKLIVALMKPSR.[L]	1xGlu->pyro-Glu [N-Term]; 3xAcetyl:2H(3) [K5; K8; K15]	P08758 1xGlu->pyro-Glu [N-Term]; 3xAcetyl:2H(3) [K76; K79; K86]	FALSE		0.000431517	0	1	1	6	P08758	P08758 [72-89]	0	2177.27	0	0.32	-1.64	0.318472	2.01		0.281	0.365		-1.83	-1.45	151.5	48.5	103.9	94.45	2	2		402.8	61.6		113	22.5		1	1		1	1		402.8	61.6		113
FALSE	High	[L].ELTGLKVFGNEIKLEKPKGKDSKKER.[D]	1xGlu->pyro-Glu [N-Term]; 7xAcetyl:2H(3) [K6; K13; K16; K18; K20; K23; K24]	P19338 1xGlu->pyro-Glu [N-Term]; 7xAcetyl:2H(3) [K370; K377; K380; K382; K384; K387; K388]	FALSE		5.12182e-05	0	1	1	12	P19338	P19338 [365-390]	0	3268.89	0	0.895	-0.16	0.984566	65	0.405	2.584	0.895	-1.3	1.37	-0.16	105.5	94.5	49.5	40.16	3	3	128.4	44.5	137.2	52	115	122.8	1	1	1	1	1	1	128.4	44.5	137.2	52	115
FALSE	High	[N].ELTLADCNLLPKLHIVQVVCKKYR.[G]	2xCarbamidomethyl [C7; C20]; 1xGlu->pyro-Glu [N-Term]; 3xAcetyl:2H(3) [K12; K21; K22]	O00299 2xCarbamidomethyl [C178; C191]; 1xGlu->pyro-Glu [N-Term]; 3xAcetyl:2H(3) [K183; K192; K193]	FALSE		0.000101361	0	1	1	16	O00299	O00299 [172-195]	0	3027.68	0	0.838	-0.25	0.975159	31.35	2.904	0.586	0.838	1.54	-0.77	-0.25	96.3	103.7	99.51	45.48	3	3	26	233.3	70	75.4	136.6	58.7	1	1	1	1	1	1	26	233.3	70	75.4	136.6
FALSE	High	[S].EITTKDLKEKKEVVEEAENGR.[D]	1xGlu->pyro-Glu [N-Term]; 4xAcetyl:2H(3) [K5; K8; K10; K11]	P06454 1xGlu->pyro-Glu [N-Term]; 4xAcetyl:2H(3) [K15; K18; K20; K21]	FALSE		3.03491e-05	0	1	1	11	P06454	P06454 [11-31]	0	2607.39	0	2.416	1.27	0.882342	2.14	2.451	2.416	1.885	1.29	1.27	0.91	67.1	132.9	29.41	37.51	3	3	81.1	46.2	56.3	198.9	111.5	106	1	1	1	1	1	1	81.1	46.2	56.3	198.9	111.5
FALSE	High	[A].ELVALAQAVNAR.[A]	1xGlu->pyro-Glu [N-Term]	P22314 1xGlu->pyro-Glu [N-Term]	FALSE		0.00233962	0	1	1	9	P22314	P22314 [357-368]	0	1236.71	0	0.615	-0.7	0.857351	27.19	0.615	1.734	0.317	-0.7	0.79	-1.66	141.4	58.6	73.19	64.71	3	3	213.2	31	129.7	131.2	53.7	41.2	1	1	1	1	1	1	213.2	31	129.7	131.2	53.7
FALSE	High	[R].ELVFKEDGQEYAQVIKMLGNGR.[L]	1xGlu->pyro-Glu [N-Term]; 2xAcetyl:2H(3) [K5; K16]	P47813 1xGlu->pyro-Glu [N-Term]; 2xAcetyl:2H(3) [K29; K40]	FALSE		0.00146259	0	1	2	5	P47813	P47813 [25-46]	0	2596.33	0	100	6.64	1.64805e-16	0	100	100	2.727	6.64	6.64	1.45	44.9	155.1		79.75	1	3			33.1	114.3	362.4	90.2			1	1	1	1			33.1	114.3	362.4
FALSE	High	[R].ELVFKEDGQEYAQVIKMLGNGR.[L]	2xAcetyl:2H(3) [K5; K16]; 1xAcetyl:2H(3) [N-Term]	P47813 2xAcetyl:2H(3) [K29; K40]; 1xAcetyl:2H(3) [N-Term]	FALSE		0.00106382	0	1	2	7	P47813	P47813 [25-46]	0	2659.37	0	1.98	0.99	0.967863	51.38	100	1.294	1.98	6.64	0.37	0.99	89.8	110.2	63.05	82.6	2	3		169.4	64.9	18.1	219.1	128.5		1	1	1	1	1		169.4	64.9	18.1	219.1
FALSE	High	[N].ELVPLVYVEDPKGNR.[I]	1xGlu->pyro-Glu [N-Term]; 1xAcetyl:2H(3) [K12]	Q7SIH1 1xGlu->pyro-Glu [N-Term]; 1xAcetyl:2H(3) [K171]	TRUE	FBS	0.000935186	0	1	1	29	Q7SIH1	Q7SIH1 [160-174]	0	1754.95	0	0.705	-0.51	0.939152	1.56	2.019	0.69	0.705	1.01	-0.54	-0.51	117.3	82.7	3.28	70.53	3	3	96.3	90.5	91.8	194.4	62.4	64.7	1	1	1	1	1	1	96.3	90.5	91.8	194.4	62.4
FALSE	High	[NS].ELVQKAKLAEQAER.[Y]	1xGlu->pyro-Glu [N-Term]; 2xAcetyl:2H(3) [K5; K7]	P63104 1xGlu->pyro-Glu [N-Term]; 2xAcetyl:2H(3) [K9; K11]; P31946 1xGlu->pyro-Glu [N-Term]; 2xAcetyl:2H(3) [K11; K13]	FALSE		0.000483505	0	2	2	52	P63104; P31946	P63104 [5-18]; P31946 [7-20]	0	1684.95	1	0.492	-1.02	0.665313	3.61	0.492	1.546	0.442	-1.02	0.63	-1.18	134.1	65.9	34.04	32.56	3	3	136.7	72.4	146.8	67.2	111.9	64.9	1	1	1	1	1	1	136.7	72.4	146.8	67.2	111.9
FALSE	High	[NS].ELVQKAKLAEQAER.[Y]	2xAcetyl:2H(3) [K5; K7]	P63104 2xAcetyl:2H(3) [K9; K11]; P31946 2xAcetyl:2H(3) [K11; K13]	FALSE		0.00215256	0	2	2	7	P63104; P31946	P63104 [5-18]; P31946 [7-20]	0	1702.96	0	0.872	-0.2	0.961721	1.52		0.884	0.86		-0.18	-0.22	106.8	93.2	83.88	85.11	2	2		254.4	65		224.8	55.9		1	1		1	1		254.4	65		224.8
FALSE	High	[R].EIVSGMKYIQHTYR.[K]	1xAcetyl:2H(3) [K7]; 1xAcetyl:2H(3) [N-Term]	P52565 1xAcetyl:2H(3) [K127]; 1xAcetyl:2H(3) [N-Term]	FALSE		0.000106081	0	1	1	13	P52565	P52565 [121-134]	0	1814.94	0	1.121	0.17	0.99991	36.82	1.121	0.824	1.4	0.17	-0.28	0.49	88	112	53.97	44.76	3	3	44.8	149.5	96.8	50.2	123.3	135.4	1	1	1	1	1	1	44.8	149.5	96.8	50.2	123.3
FALSE	High	[F].ELYLGYEYVTALQNLR.[E]	1xGlu->pyro-Glu [N-Term]	G3X6N3 1xGlu->pyro-Glu [N-Term]; Q29443 1xGlu->pyro-Glu [N-Term]	TRUE	FBS	6.62851e-05	0	2	2	15	G3X6N3; Q29443	G3X6N3 [335-350]; Q29443 [335-350]	0	1927	0	0.542	-0.88	0.79395	1.27	1.017	0.526	0.542	0.02	-0.93	-0.88	119.1	80.9	25.14	42.35	3	3	115.7	149.3	90	117.7	78.5	48.8	1	1	1	1	1	1	115.7	149.3	90	117.7	78.5
FALSE	High	[R].EMAEKEKEKIER.[E]	3xAcetyl:2H(3) [K5; K7; K9]	P26038 3xAcetyl:2H(3) [K335; K337; K339]	FALSE		0.00339091	0	1	1	8	P26038	P26038 [331-342]	0	1654.87	0	0.929	-0.11	0.999983	35.63	0.67	0.929	5.304	-0.58	-0.11	2.41	94.3	105.7	50.89	52.17	3	3	94.9	114.6	35	63.6	106.4	185.5	1	1	1	1	1	1	94.9	114.6	35	63.6	106.4
FALSE	High	[R].EMAEKEKEKIEREKEELMER.[L]	1xGlu->pyro-Glu [N-Term]; 4xAcetyl:2H(3) [K5; K7; K9; K14]	P26038 1xGlu->pyro-Glu [N-Term]; 4xAcetyl:2H(3) [K335; K337; K339; K344]	FALSE		0.00419162	0	1	1	3	P26038	P26038 [331-350]	1	2726.38	0	0.01	-6.64	1.64805e-16	0	0.01		0.01	-6.64		-6.64	200		39.98		2		384.8		215.2				1		1				384.8		215.2
FALSE	High	[R].EMAEKEKEKIEREKEELMER.[L]	4xAcetyl:2H(3) [K5; K7; K9; K14]	P26038 4xAcetyl:2H(3) [K335; K337; K339; K344]	FALSE		0.000779604	0	1	1	9	P26038	P26038 [331-350]	1	2744.39	0	1.051	0.07	0.999983	28.85	0.847	1.346	1.051	-0.24	0.43	0.07	85.3	114.7	70.47	49.71	3	3	182	64.6	54.8	154.1	87	57.6	1	1	1	1	1	1	182	64.6	54.8	154.1	87
FALSE	High	[G].EMEQVENGLKEKTLKKWLR.[M]	1xGlu->pyro-Glu [N-Term]; 4xAcetyl:2H(3) [K10; K12; K15; K16]	Q9N2I2 1xGlu->pyro-Glu [N-Term]; 4xAcetyl:2H(3) [K279; K281; K284; K285]	TRUE	FBS	0.000533601	0	1	1	18	Q9N2I2	Q9N2I2 [270-288]	0	2521.39	0	0.54	-0.89	0.795259	12.71	0.699	0.54	0.284	-0.52	-0.89	-1.82	137.5	62.5	10.93	45.79	3	3	143.7	116.2	137.9	100.4	62.7	39.2	1	1	1	1	1	1	143.7	116.2	137.9	100.4	62.7
FALSE	High	[S].EMEVQDAELKALLQSSASR.[K]	1xGlu->pyro-Glu [N-Term]; 1xAcetyl:2H(3) [K10]	Q9UQ80 1xGlu->pyro-Glu [N-Term]; 1xAcetyl:2H(3) [K355]	FALSE		1.49905e-05	0	1	1	20	Q9UQ80	Q9UQ80 [346-364]	0	2132.07	0	0.838	-0.26	0.975159	29.63	0.599	1.238	0.838	-0.74	0.31	-0.26	106.3	93.7	21.52	21.92	3	3	115.1	81.9	126.6	69	101.4	106	1	1	1	1	1	1	115.1	81.9	126.6	69	101.4
FALSE	High	[R].EMFEVTGLHDVDQGWMR.[A]	1xGlu->pyro-Glu [N-Term]	Q9BWS9 1xGlu->pyro-Glu [N-Term]	FALSE		0.00057129	0	1	1	1	Q9BWS9	Q9BWS9 [119-135]	0	2031.91	0	0.474	-1.08	0.678381	13.74	1.075	0.474	0.279	0.1	-1.08	-1.84	135.7	64.3	28.04	37.2	3	3	88.8	145.9	157	95.4	69.2	43.7	1	1	1	1	1	1	88.8	145.9	157	95.4	69.2
FALSE	High	[G].EMIKKIQNDAGVR.[I]	1xGlu->pyro-Glu [N-Term]; 2xAcetyl:2H(3) [K4; K5]	Q96AE4 1xGlu->pyro-Glu [N-Term]; 2xAcetyl:2H(3) [K299; K300]; Q92945 1xGlu->pyro-Glu [N-Term]; 2xAcetyl:2H(3) [K346; K347]	FALSE		0.00260137	0	2	3	1	Q96AE4; Q92945	Q96AE4 [296-308]; Q92945 [343-355]	0	1573.86	0	2.39	1.26	0.878275	44.17	1.33	2.39	3.102	0.41	1.26	1.63	62.2	137.8	46.95	34.3	3	3	98.3	38	59	130.7	90.9	183.1	1	1	1	1	1	1	98.3	38	59	130.7	90.9
FALSE	High	[R].EMLQQSKILKVIR.[K]	1xGlu->pyro-Glu [N-Term]; 2xAcetyl:2H(3) [K7; K10]	P08238 1xGlu->pyro-Glu [N-Term]; 2xAcetyl:2H(3) [K399; K402]; Q76LV2 1xGlu->pyro-Glu [N-Term]; 2xAcetyl:2H(3) [K408; K411]	TRUE	FBS	0.00274301	0	2	3	13	P08238; Q76LV2	P08238 [393-405]; Q76LV2 [402-414]	0	1657.99	0	1.827	0.87	0.683089	85.14	0.758	2.877	1.827	-0.4	1.52	0.87	67.4	132.6	97.4	29.94	3	3	193.1	32.5	47.6	146.4	93.5	86.9	1	1	1	1	1	1	193.1	32.5	47.6	146.4	93.5
FALSE	High	[R].EMLQQSKILKVIR.[K]	2xAcetyl:2H(3) [K7; K10]; 1xAcetyl:2H(3) [N-Term]	P08238 2xAcetyl:2H(3) [K399; K402]; 1xAcetyl:2H(3) [N-Term]; Q76LV2 2xAcetyl:2H(3) [K408; K411]; 1xAcetyl:2H(3) [N-Term]	TRUE	FBS	0.000625714	0	2	3	13	P08238; Q76LV2	P08238 [393-405]; Q76LV2 [402-414]	0	1721.03	0	2.212	1.15	0.598741	35.85	0.732	2.747	2.212	-0.45	1.46	1.15	60.2	139.8	86.08	9.98	3	3	172.5	39.9	47.3	126.2	109.7	104.5	1	1	1	1	1	1	172.5	39.9	47.3	126.2	109.7
FALSE	High	[R].EMLQQSKILKVIR.[K]	1xOxidation [M2]; 2xAcetyl:2H(3) [K7; K10]; 1xAcetyl:2H(3) [N-Term]	P08238 1xOxidation [M394]; 2xAcetyl:2H(3) [K399; K402]; 1xAcetyl:2H(3) [N-Term]; Q76LV2 1xOxidation [M403]; 2xAcetyl:2H(3) [K408; K411]; 1xAcetyl:2H(3) [N-Term]	TRUE	FBS	0.00400549	0	2	3	3	P08238; Q76LV2	P08238 [393-405]; Q76LV2 [402-414]	0	1737.03	0	5.168	2.37	0.31456	1430.61	0.267		100	-1.9		6.64	155.2	44.8		10.86	1	2	380.1			101.5		118.4	1			1		1	380.1			101.5
FALSE	High	[T].EMLVHNAQNLMQSVKETVR.[E]	1xGlu->pyro-Glu [N-Term]; 1xAcetyl:2H(3) [K15]	P18206 1xGlu->pyro-Glu [N-Term]; 1xAcetyl:2H(3) [K1103]	FALSE		0.00131535	0	1	1	7	P18206	P18206 [1089-1107]	0	2254.15	0	1.925	0.94	0.935284	38.53	0.915	2.425	1.925	-0.13	1.28	0.94	75.3	124.7	39.05	16.54	3	3	110.9	50.3	73.6	101.4	122	141.7	1	1	1	1	1	1	110.9	50.3	73.6	101.4	122
FALSE	High	[G].EMSGPVFTDSGIHIILR.[T]	1xGlu->pyro-Glu [N-Term]	Q13526 1xGlu->pyro-Glu [N-Term]	FALSE		0.000362445	0	1	1	5	Q13526	Q13526 [145-161]	0	1853.96	0	1.31	0.39	0.998039	22.04	1.115	2.02	1.31	0.16	1.01	0.39	66.2	133.8	36.15	35.56	3	3	63.7	65.5	115.7	71	132.4	151.6	1	1	1	1	1	1	63.7	65.5	115.7	71	132.4
FALSE	High	[E].EMVQALKQLKDSEER.[A]	1xGlu->pyro-Glu [N-Term]; 2xAcetyl:2H(3) [K7; K10]	P48637 1xGlu->pyro-Glu [N-Term]; 2xAcetyl:2H(3) [K384; K387]	FALSE		0.000711801	0	1	1	4	P48637	P48637 [378-392]	0	1875.98	0	0.786	-0.35	0.972143	18.08	0.786	1.889	0.631	-0.35	0.92	-0.66	111.1	88.9	56.96	34.41	3	3	165.6	45.1	106.6	130.2	85.3	67.2	1	1	1	1	1	1	165.6	45.1	106.6	130.2	85.3
FALSE	High	[-].MMCGAPSATQPATAETQHIADQVR.[S]	1xAcetyl [N-Term]; 1xCarbamidomethyl [C3]; 1xOxidation [M2]	P04080 1xAcetyl [N-Term]; 1xCarbamidomethyl [C3]; 1xOxidation [M2]	FALSE		5.23969e-05	0	1	1	49	P04080	P04080 [1-24]	0	2629.18	0	1.483	0.57	0.802864	44.8	0.793	1.932	1.483	-0.33	0.95	0.57	102.8	97.2	28.98	60.38	3	3	88.3	103	56.2	70	199	83.4	1	1	1	1	1	1	88.3	103	56.2	70	199
FALSE	High	[R].ETSGNLEQLLLAVVKSIR.[S]	1xGlu->pyro-Glu [N-Term]; 1xAcetyl:2H(3) [K15]	P08758 1xGlu->pyro-Glu [N-Term]; 1xAcetyl:2H(3) [K242]	FALSE		4.01809e-05	0	1	1	19	P08758	P08758 [228-245]	0	1997.15	0	1.435	0.52	0.841298	87.38	100	0.589	1.435	6.64	-0.76	0.52	112.7	87.3	77.6	64.03	2	3		248.5	72.4	28.8	146.4	103.9		1	1	1	1	1		248.5	72.4	28.8	146.4
FALSE	High	[R].ETTDTDTADQVIASFKVLAGDKNFITAEELR.[R]	2xAcetyl:2H(3) [K16; K22]	O43707 2xAcetyl:2H(3) [K853; K859]	FALSE		0.000318602	0	1	1	9	O43707	O43707 [838-868]	0	3488.75	0	1.461	0.55	0.952053	42.28	0.01	1.461	1.877	-6.64	0.55	0.91	74.5	125.5	47.84	15.16	3	2	37.1	107.5	103.7		157	194.7	1	1	1		1	1	37.1	107.5	103.7		157
FALSE	High	[R].GFIHNGIMVLPR.[Q]	1xAcetyl:2H(3) [N-Term]	P52848 1xAcetyl:2H(3) [N-Term]	FALSE		0.00186396	0	1	2	4	P52848	P52848 [472-483]	0	1398.78	0	0.424	-1.24	0.585298	2.32	0.424	0.052	0.461	-1.24	-4.25	-1.12	136.9	63.1	40.37	80.03	3	3	190.8	79.2	167.7	80.9	4.1	77.3	1	1	1	1	1	1	190.8	79.2	167.7	80.9	4.1
FALSE	High	[R].GFPTIYFSPANKKLNPKKYEGGR.[E]	4xAcetyl:2H(3) [K12; K13; K17; K18]; 1xAcetyl:2H(3) [N-Term]	P30101 4xAcetyl:2H(3) [K460; K461; K465; K466]; 1xAcetyl:2H(3) [N-Term]	FALSE		0.000506014	0	1	1	25	P30101	P30101 [449-471]	0	2837.55	0	0.686	-0.54	0.924781	13.75	0.551	0.893	0.686	-0.86	-0.16	-0.54	127.1	72.9	18.62	40.9	3	3	114.1	138.5	95.4	62.9	123.6	65.5	1	1	1	1	1	1	114.1	138.5	95.4	62.9	123.6
FALSE	High	[L].GFSAKEAQDTSDGIIQKNSYR.[Y]	2xAcetyl:2H(3) [K5; K17]; 1xAcetyl:2H(3) [N-Term]	P18850 2xAcetyl:2H(3) [K424; K436]; 1xAcetyl:2H(3) [N-Term]	FALSE		0.00228705	0	1	1	3	P18850	P18850 [420-440]	0	2450.21	0	1.341	0.42	0.975268	109.18	1.341	3.485	0.354	0.42	1.8	-1.5	77.7	122.3	91.98	95.61	3	3	174.7	25.5	56.5	234.3	89	20	1	1	1	1	1	1	174.7	25.5	56.5	234.3	89
FALSE	High	[M].GFVKVVKNKAYFKR.[Y]	4xAcetyl:2H(3) [K4; K7; K9; K13]	P46777 4xAcetyl:2H(3) [K5; K8; K10; K14]	FALSE		0.00130542	0	1	1	1	P46777	P46777 [2-15]	0	1864.12	0	1.088	0.12	0.983531	103		2.081	0.569		1.06	-0.81	95.8	104.2	17.76	91.86	2	2		139.5	108.4		290.4	61.7		1	1		1	1		139.5	108.4		290.4
FALSE	High	[M].GFVKVVKNKAYFKR.[Y]	4xAcetyl:2H(3) [K4; K7; K9; K13]; 1xAcetyl:2H(3) [N-Term]	P46777 4xAcetyl:2H(3) [K5; K8; K10; K14]; 1xAcetyl:2H(3) [N-Term]	FALSE		6.14437e-05	0	1	1	171	P46777	P46777 [2-15]	0	1909.15	0	1.204	0.27	0.93455	56.13	0.748	1.204	1.895	-0.42	0.27	0.92	89.8	110.2	37.53	14.48	3	3	132.4	80.7	65.9	99	97.1	124.9	1	1	1	1	1	1	132.4	80.7	65.9	99	97.1
FALSE	High	[R].GGHIAKDCKEPKR.[E]	1xCarbamidomethyl [C8]; 3xAcetyl:2H(3) [K6; K9; K12]	P62633 1xCarbamidomethyl [C87]; 3xAcetyl:2H(3) [K85; K88; K91]	FALSE		0.000971315	0	1	1	14	P62633	P62633 [80-92]	0	1630.87	0	6.986	2.8	0.00765783	51.27	2.335	9.402	6.986	1.22	3.23	2.8	38.1	161.9	58.36	54.35	3	3	52.7	29	15.4	123	272.5	107.4	1	1	1	1	1	1	52.7	29	15.4	123	272.5
FALSE	High	[R].GGHIAKDCKEPKR.[E]	1xCarbamidomethyl [C8]; 3xAcetyl:2H(3) [K6; K9; K12]; 1xAcetyl:2H(3) [N-Term]	P62633 1xCarbamidomethyl [C87]; 3xAcetyl:2H(3) [K85; K88; K91]; 1xAcetyl:2H(3) [N-Term]	FALSE		0.00112179	0	1	1	34	P62633	P62633 [80-92]	0	1675.9	0	3.084	1.62	0.407548	18.98	1.523	3.479	3.084	0.61	1.8	1.62	47.6	152.4	65.46	34.23	3	3	104.7	49.9	27.5	159.5	173.5	84.8	1	1	1	1	1	1	104.7	49.9	27.5	159.5	173.5
FALSE	High	[R].GGKICLTDHFKPLWAR.[N]	1xCarbamidomethyl [C5]; 2xAcetyl:2H(3) [K3; K11]; 1xAcetyl:2H(3) [N-Term]	Q9Y3C8 1xCarbamidomethyl [C116]; 2xAcetyl:2H(3) [K114; K122]; 1xAcetyl:2H(3) [N-Term]	FALSE		0.000659824	0	1	1	5	Q9Y3C8	Q9Y3C8 [112-127]	0	2034.09	0	16.086	4.01	0.0082485	448.9	2.588	100		1.37	6.64		66.6	133.4		35.34	1	2	116.7			302	181.3		1			1	1		116.7			302	181.3
FALSE	High	[R].GHLENNPALEKLLPHIR.[G]	1xAcetyl:2H(3) [K11]	P05388 1xAcetyl:2H(3) [K77]	FALSE		0.000246182	0	1	1	12	P05388	P05388 [67-83]	0	1996.12	0	1.228	0.3	0.976719	83.52	1.228	6.274	0.536	0.3	2.65	-0.9	56	144	60.12	74.47	3	3	114.6	35.8	54.7	140.8	224.8	29.4	1	1	1	1	1	1	114.6	35.8	54.7	140.8	224.8
FALSE	High	[R].GHLENNPALEKLLPHIR.[G]	1xAcetyl:2H(3) [K11]; 1xAcetyl:2H(3) [N-Term]	P05388 1xAcetyl:2H(3) [K77]; 1xAcetyl:2H(3) [N-Term]	FALSE		0.00136616	0	1	1	2	P05388	P05388 [67-83]	0	2041.15	0	1.864	0.9	0.905392	0	1.864			0.9			69.8	130.2			1	1	209.5			390.5			1			1			209.5			390.5
FALSE	High	[R].GHQAFDVGQPR.[D]			FALSE		0.00403593	0	1	1	7	P11717	P11717 [239-249]	0	1211.59	0	3.756	1.91	0.551586	0	3.756			1.91			42.1	157.9			1	1	126.2			473.8			1			1			126.2			473.8
FALSE	High	[R].GHYTIGKEIIDLVLDR.[I]	1xAcetyl:2H(3) [K7]	P68363 1xAcetyl:2H(3) [K112]	FALSE		0.00125687	0	1	3	3	P68363	P68363 [106-121]	0	1887.04	0	0.694	-0.53	0.909588	70.31	0.01	11.423	0.694	-6.64	3.51	-0.53	65.5	134.5	33.3	111.4	3	2	65.1	34	66.5		388.3	46.1	1	1	1		1	1	65.1	34	66.5		388.3
FALSE	High	[R].GHYTIGKEIIDLVLDR.[I]	1xAcetyl:2H(3) [K7]; 1xAcetyl:2H(3) [N-Term]	P68363 1xAcetyl:2H(3) [K112]; 1xAcetyl:2H(3) [N-Term]	FALSE		1.58079e-05	0	1	3	21	P68363	P68363 [106-121]	0	1932.07	0	2.941	1.56	0.263662	8.52	1.345	3.11	2.941	0.43	1.64	1.56	48.7	151.3	77.04	26.24	3	3	127.2	39.7	35.1	171.1	123.5	103.3	1	1	1	1	1	1	127.2	39.7	35.1	171.1	123.5
FALSE	High	[R].GFGHIGIAVPDVYSACKR.[F]	1xCarbamidomethyl [C16]; 1xAcetyl:2H(3) [K17]; 1xAcetyl:2H(3) [N-Term]	Q04760 1xCarbamidomethyl [C139]; 1xAcetyl:2H(3) [K140]; 1xAcetyl:2H(3) [N-Term]	FALSE		2.61953e-06	0	1	1	96	Q04760	Q04760 [124-141]	0	2037.05	0	0.835	-0.26	0.992688	9.1	0.908	0.835	0.59	-0.14	-0.26	-0.76	104.8	95.2	30.56	43.34	3	3	106.5	147.2	79.7	96.8	122.8	47	1	1	1	1	1	1	106.5	147.2	79.7	96.8	122.8
FALSE	High	[K].GKAITKKKYIGIR.[M]	4xAcetyl:2H(3) [K2; K6; K7; K8]; 1xAcetyl:2H(3) [N-Term]	Q92743 4xAcetyl:2H(3) [K375; K379; K380; K381]; 1xAcetyl:2H(3) [N-Term]	FALSE		0.00156583	0	1	1	6	Q92743	Q92743 [374-386]	0	1701.09	0	1.759	0.82	0.963859	8.87	1.759	3.586	1.654	0.82	1.84	0.73	43.6	156.4	90.08	69.85	3	3	132.9	34.7	28	233.8	124.4	46.3	1	1	1	1	1	1	132.9	34.7	28	233.8	124.4
FALSE	High	[M].GKFMKPGKVVLVLAGR.[Y]	1xOxidation [M4]; 3xAcetyl:2H(3) [K2; K5; K8]; 1xAcetyl:2H(3) [N-Term]	P61353 1xOxidation [M5]; 3xAcetyl:2H(3) [K3; K6; K9]; 1xAcetyl:2H(3) [N-Term]	FALSE		2.39903e-05	0	1	1	19	P61353	P61353 [2-17]	0	1896.15	0	1.034	0.05	0.998323	59.12	0.27	1.034	1.447	-1.89	0.05	0.53	101.7	98.3	50.23	43.44	3	3	182.3	79.2	84.7	49.3	81.9	122.6	1	1	1	1	1	1	182.3	79.2	84.7	49.3	81.9
FALSE	High	[R].GKFPDATETDLQELVAKR.[S]	2xAcetyl:2H(3) [K2; K17]	F1N5M2 2xAcetyl:2H(3) [K428; K443]	TRUE	FBS	0.000141515	0	1	1	4	F1N5M2	F1N5M2 [427-444]	0	2108.11	0	0.705	-0.5	0.939152	7.69		0.635	0.783		-0.65	-0.35	117.3	82.7	37.87	23.86	2	2		225.1	130		143.1	101.8		1	1		1	1		225.1	130		143.1
FALSE	High	[R].GKGGKGLGKGGAKR.[H]	4xAcetyl:2H(3) [K2; K5; K9; K13]; 1xAcetyl:2H(3) [N-Term]	P62805 4xAcetyl:2H(3) [K6; K9; K13; K17]; 1xAcetyl:2H(3) [N-Term]	FALSE		9.39581e-05	0	1	1	17	P62805	P62805 [5-18]	0	1495.92	0	7.797	2.96	0.11121	42.08	1.256	10.01	7.797	0.33	3.32	2.96	24.5	175.5	114.02	31.07	3	3	114.3	20	13.8	143.6	200.5	107.7	1	1	1	1	1	1	114.3	20	13.8	143.6	200.5
FALSE	High	[R].GKGIYLWDVEGR.[K]	1xAcetyl:2H(3) [K2]; 1xAcetyl:2H(3) [N-Term]	P04181 1xAcetyl:2H(3) [K66]; 1xAcetyl:2H(3) [N-Term]	FALSE		0.00184989	0	1	1	25	P04181	P04181 [65-76]	0	1482.79	0	0.231	-2.11	0.0321156	0.25	0.231	0.345	0.224	-2.11	-1.54	-2.16	160.5	39.5	38.74	50.26	3	3	87.6	183	200.9	20.3	63.1	45	1	1	1	1	1	1	87.6	183	200.9	20.3	63.1
FALSE	High	[D].GKHVVFGKVKEGMNIVEAMER.[F]	3xAcetyl:2H(3) [K2; K8; K10]	P62937 3xAcetyl:2H(3) [K125; K131; K133]	FALSE		4.64091e-05	0	1	1	5	P62937	P62937 [124-144]	0	2493.33	0	1.751	0.81	0.982054	61.21		2.617	1.171		1.39	0.23	72.7	127.3	63.37	100.21	2	2		135	51.5		353.3	60.3		1	1		1	1		135	51.5		353.3
FALSE	High	[D].GKHVVFGKVKEGMNIVEAMER.[F]	3xAcetyl:2H(3) [K2; K8; K10]; 1xAcetyl:2H(3) [N-Term]	P62937 3xAcetyl:2H(3) [K125; K131; K133]; 1xAcetyl:2H(3) [N-Term]	FALSE		0.00175433	0	1	1	3	P62937	P62937 [124-144]	0	2538.36	0	100	6.64	1.64805e-16	0	100	100		6.64	6.64			200		70.3		2				150.9	449.1					1	1					150.9	449.1
FALSE	High	[R].GKKGAVAEDGDELR.[T]	2xAcetyl:2H(3) [K2; K3]	P27695 2xAcetyl:2H(3) [K6; K7]	FALSE		0.000309081	0	1	1	1	P27695	P27695 [5-18]	0	1534.8	0	1.116	0.16	0.999636	2.78		1.095	1.137		0.13	0.19	94.5	105.5	10.79	8.15	2	2		152.7	131.1		167.2	149		1	1		1	1		152.7	131.1		167.2
FALSE	High	[R].GKKGAVAEDGDELR.[T]	2xAcetyl:2H(3) [K2; K3]; 1xAcetyl:2H(3) [N-Term]	P27695 2xAcetyl:2H(3) [K6; K7]; 1xAcetyl:2H(3) [N-Term]	FALSE		0.000330915	0	1	1	8	P27695	P27695 [5-18]	0	1579.83	0	1.092	0.13	0.997389	131.96		2.433	0.49		1.28	-1.03	95.6	104.4	61.45	45.8	2	2		83.2	211.1		202.4	103.4		1	1		1	1		83.2	211.1		202.4
FALSE	High	[M].GKIALQLKATLENITNLRPVGEDFR.[W]	2xAcetyl:2H(3) [K2; K8]; 1xAcetyl:2H(3) [N-Term]	Q9NWV4 2xAcetyl:2H(3) [K3; K9]; 1xAcetyl:2H(3) [N-Term]	FALSE		6.67897e-05	0	1	1	16	Q9NWV4	Q9NWV4 [2-26]	0	2931.66	0	2.464	1.3	0.209994	118.11	2.464	0.501	5.048	1.3	-1	2.34	59.1	140.9	124.03	89.21	3	3	7.1	207.7	43.6	17.6	104	220	1	1	1	1	1	1	7.1	207.7	43.6	17.6	104
FALSE	High	[Y].GKIDTIEIITDR.[Q]	1xAcetyl:2H(3) [K2]	P22626 1xAcetyl:2H(3) [K137]	FALSE		0.00360266	0	1	1	1	P22626	P22626 [136-147]	0	1418.79	0	100	6.64	1.64805e-16	0	100	100		6.64	6.64			200		122.91		2				39.3	560.7					1	1					39.3	560.7
FALSE	High	[R].GKLKVLATAFDTTLGGR.[K]	2xAcetyl:2H(3) [K2; K4]; 1xAcetyl:2H(3) [N-Term]	P34932 2xAcetyl:2H(3) [K219; K221]; 1xAcetyl:2H(3) [N-Term]	FALSE		0.000675006	0	1	1	2	P34932	P34932 [218-234]	0	1883.09	0	5.798	2.54	0.138997	1274.31	0.336	100		-1.57	6.64		130.4	69.6		60.97	1	2	275			92.4	232.6		1			1	1		275			92.4	232.6
FALSE	High	[M].GKLYKELPDPQESIQR.[A]	2xAcetyl:2H(3) [K2; K5]	G3X6N3 2xAcetyl:2H(3) [K152; K155]	TRUE	FBS	0.000193131	0	1	1	3	G3X6N3	G3X6N3 [151-166]	0	1991.07	0	0.075	-3.73	0.00388247	3.09		0.565	0.01		-0.82	-6.64	101.2	98.8	70.47		2	1		315.8	105.7		178.5			1	1		1			315.8	105.7		178.5
FALSE	High	[R].GKMSSYAFFVQTCR.[E]	1xCarbamidomethyl [C13]; 1xAcetyl:2H(3) [K2]	P26583 1xCarbamidomethyl [C23]; 1xAcetyl:2H(3) [K12]; P09429 1xCarbamidomethyl [C23]; 1xAcetyl:2H(3) [K12]	FALSE		0.000483505	0	2	3	12	P26583; P09429	P26583 [11-24]; P09429 [11-24]	0	1726.81	0	1.014	0.02	0.998323	99.05	0.337	3.131	1.014	-1.57	1.65	0.02	52.6	147.4	124.72	47.05	3	3	295.6	32.3	35.5	99.5	101.1	36	1	1	1	1	1	1	295.6	32.3	35.5	99.5	101.1
FALSE	High	[M].GKFMKPGKVVLVLAGR.[Y]	3xAcetyl:2H(3) [K2; K5; K8]; 1xAcetyl:2H(3) [N-Term]	P61353 3xAcetyl:2H(3) [K3; K6; K9]; 1xAcetyl:2H(3) [N-Term]	FALSE		9.18444e-05	0	1	1	32	P61353	P61353 [2-17]	0	1880.16	0	1.348	0.43	0.962407	51.74	0.878	1.348	2.442	-0.19	0.43	1.29	103.6	96.4	62.48	56.32	3	3	85.2	139.7	32.5	74.8	188.4	79.4	1	1	1	1	1	1	85.2	139.7	32.5	74.8	188.4
FALSE	High	[R].GFGHIGIAVPDVYSACKR.[F]	1xCarbamidomethyl [C16]; 1xAcetyl:2H(3) [K17]	Q04760 1xCarbamidomethyl [C139]; 1xAcetyl:2H(3) [K140]	FALSE		0.000533601	0	1	1	13	Q04760	Q04760 [124-141]	0	1992.02	0	0.423	-1.24	0.634463	12.25	0.228	2.04	0.423	-2.13	1.03	-1.24	97.1	102.9	100.23	74.08	3	3	281.2	60.6	49.5	64.2	123.6	20.9	1	1	1	1	1	1	281.2	60.6	49.5	64.2	123.6
FALSE	High	[R].GFGFVTYATVEEVDAAMNARPHKVDGR.[V]	1xOxidation [M17]; 1xAcetyl:2H(3) [K23]; 1xAcetyl:2H(3) [N-Term]	P09651 1xOxidation [M72]; 1xAcetyl:2H(3) [K78]; 1xAcetyl:2H(3) [N-Term]	FALSE		0.000112716	0	1	1	24	P09651	P09651 [56-82]	0	3043.48	0	2.586	1.37	0.575619	102.04	0.806	5.107	2.586	-0.31	2.35	1.37	81.5	118.5	83.58	56.19	3	3	138.9	12	77	112	61.2	199	1	1	1	1	1	1	138.9	12	77	112	61.2
FALSE	High	[R].GFGFVTYATVEEVDAAMNARPHKVDGR.[V]	1xAcetyl:2H(3) [K23]; 1xAcetyl:2H(3) [N-Term]	P09651 1xAcetyl:2H(3) [K78]; 1xAcetyl:2H(3) [N-Term]	FALSE		2.4173e-05	0	1	1	60	P09651	P09651 [56-82]	0	3027.49	0	2.049	1.04	0.369041	19.18	2.314	1.646	2.049	1.21	0.72	1.04	73.8	126.2	41.72	44.3	3	3	81.5	84.7	34.8	188.6	139.3	71.2	1	1	1	1	1	1	81.5	84.7	34.8	188.6	139.3
FALSE	High	[R].GALQNIIPASTGAAKAVGKVIPELNGKLTGMAFR.[V]	3xAcetyl:2H(3) [K15; K19; K27]	P04406 3xAcetyl:2H(3) [K215; K219; K227]	FALSE		1.54522e-05	0	1	1	20	P04406	P04406 [201-234]	0	3528.99	0	1.196	0.26	0.976719	58.72	1.196	2.098	0.722	0.26	1.07	-0.47	91.1	108.9	57.57	102.89	3	3	56.6	127.7	46.5	67.7	268	33.6	1	1	1	1	1	1	56.6	127.7	46.5	67.7	268
FALSE	High	[R].GALQNIIPASTGAAKAVGKVIPELNGKLTGMAFR.[V]	1xOxidation [M31]; 3xAcetyl:2H(3) [K15; K19; K27]	P04406 1xOxidation [M231]; 3xAcetyl:2H(3) [K215; K219; K227]	FALSE		0.000669907	0	1	1	16	P04406	P04406 [201-234]	0	3544.99	0	0.647	-0.63	0.899206	33.39	0.299	2.141	0.647	-1.74	1.1	-0.63	121.4	78.6	56.21	35.99	3	3	186.1	52.9	116.5	55.7	113.4	75.4	1	1	1	1	1	1	186.1	52.9	116.5	55.7	113.4
FALSE	High	[R].GALQNIIPASTGAAKAVGKVIPELNGKLTGMAFR.[V]	3xAcetyl:2H(3) [K15; K19; K27]; 1xAcetyl:2H(3) [N-Term]	P04406 3xAcetyl:2H(3) [K215; K219; K227]; 1xAcetyl:2H(3) [N-Term]	FALSE		0.000476227	0	1	1	7	P04406	P04406 [201-234]	0	3574.02	0	1.066	0.09	0.976058	97.28	28.47	1.066	0.366	4.83	0.09	-1.45	139.6	60.4	106.94	113.46	3	3	1.3	215.2	85.7	37.1	229.3	31.4	1	1	1	1	1	1	1.3	215.2	85.7	37.1	229.3
FALSE	High	[R].GALQNIIPASTGAAKAVGKVIPELNGKLTGMAFR.[V]	1xOxidation [M31]; 3xAcetyl:2H(3) [K15; K19; K27]; 1xAcetyl:2H(3) [N-Term]	P04406 1xOxidation [M231]; 3xAcetyl:2H(3) [K215; K219; K227]; 1xAcetyl:2H(3) [N-Term]	FALSE		5.96076e-05	0	1	1	6	P04406	P04406 [201-234]	0	3590.02	0	0.08	-3.65	2.47513e-06	3.71		0.637	0.01		-0.65	-6.64	139.4	60.6	51.67		2	1		158.4	340.7		100.9			1	1		1			158.4	340.7		100.9
FALSE	High	[KR].GASQAGMTGYGMPR.[Q]	1xAcetyl:2H(3) [N-Term]	P37802 1xAcetyl:2H(3) [N-Term]	FALSE		0.00344266	0	1	2	17	P37802	P37802 [183-196]	0	1428.64	0	3.987	2	0.202758	50.29	2.253	3.987	5.34	1.17	2	2.42	40.1	159.9	71.57	26.03	3	3	87.5	33.8	23.2	197	134.9	123.6	1	1	1	1	1	1	87.5	33.8	23.2	197	134.9
FALSE	High	[KR].GASQAGMTGYGMPR.[Q]	1xOxidation [M]; 1xAcetyl:2H(3) [N-Term]	P37802 1xOxidation [M]; 1xAcetyl:2H(3) [N-Term]	FALSE		0.0032403	0	1	2	12	P37802	P37802 [183-196]	0	1444.64	0	3.743	1.9	0.406168	22.46	0.566	3.743	4.31	-0.82	1.9	2.11	54.5	145.5	111.83	43.39	3	3	189	19.3	40	106.9	72.3	172.5	1	1	1	1	1	1	189	19.3	40	106.9	72.3
FALSE	High	[KR].GASQAGMTGYGMPR.[Q]	2xOxidation [M7; M12]; 1xAcetyl:2H(3) [N-Term]	P37802 2xOxidation [M189; M194]; 1xAcetyl:2H(3) [N-Term]	FALSE		0.0032403	0	1	2	3	P37802	P37802 [183-196]	0	1460.63	0	0.133	-2.91	0.0879216	0	0.133			-2.91			176.5	23.5			1	1	529.5			70.5			1			1			529.5			70.5
FALSE	High	[R].GAVELKKNEFQGELEKQR.[E]	3xAcetyl:2H(3) [K6; K7; K16]; 1xAcetyl:2H(3) [N-Term]	Q8NBJ4 3xAcetyl:2H(3) [K66; K67; K76]; 1xAcetyl:2H(3) [N-Term]	FALSE		1.18497e-05	0	1	1	3	Q8NBJ4	Q8NBJ4 [61-78]	0	2283.24	0	0.511	-0.97	0.850188	16.97	0.287	1.284	0.511	-1.8	0.36	-0.97	126.3	73.7	36.76	39.05	3	3	142.8	74.3	163.2	40.9	95.3	83.4	1	1	1	1	1	1	142.8	74.3	163.2	40.9	95.3
FALSE	High	[R].GAVGALLVYDIAKHLTYENVER.[W]	1xAcetyl:2H(3) [K13]; 1xAcetyl:2H(3) [N-Term]	Q15907 1xAcetyl:2H(3) [K95]; 1xAcetyl:2H(3) [N-Term]	FALSE		0.00127607	0	1	2	1	Q15907	Q15907 [83-104]	0	2521.36	0	100	6.64	1.64805e-16	0			100			6.64		200				1						600						1
FALSE	High	[R].GCALQCAILSPAFKVR.[E]	2xCarbamidomethyl [C2; C6]; 1xAcetyl:2H(3) [K14]; 1xAcetyl:2H(3) [N-Term]	O95757 2xCarbamidomethyl [C376; C380]; 1xAcetyl:2H(3) [K388]; 1xAcetyl:2H(3) [N-Term]; P34932 2xCarbamidomethyl [C376; C380]; 1xAcetyl:2H(3) [K388]; 1xAcetyl:2H(3) [N-Term]; Q92598 2xCarbamidomethyl [C376; C380]; 1xAcetyl:2H(3) [K388]; 1xAcetyl:2H(3) [N-Term]	FALSE		0.000616296	0	3	3	5	O95757; P34932; Q92598	O95757 [375-390]; P34932 [375-390]; Q92598 [375-390]	0	1881	0	0.777	-0.36	0.940182	52.66	1.234	0.777	0.01	0.3	-0.36	-6.64	57.9	142.1	114.85	115.64	3	2	226.6	36.1	29.6	279.6	28		1	1	1	1	1		226.6	36.1	29.6	279.6	28
FALSE	High	[R].GDGTGGKSIYGER.[F]	1xAcetyl:2H(3) [K7]; 1xAcetyl:2H(3) [N-Term]	P23284 1xAcetyl:2H(3) [K116]; 1xAcetyl:2H(3) [N-Term]	FALSE		0.00349519	0	1	1	51	P23284	P23284 [110-122]	0	1386.68	0	0.642	-0.64	0.914729	8.87	0.794	0.549	0.642	-0.33	-0.86	-0.64	121.8	78.2	19.36	1.55	3	3	97.1	144.1	123.3	77.1	79.1	79.2	1	1	1	1	1	1	97.1	144.1	123.3	77.1	79.1
FALSE	High	[D].GDKGKQGGPTYYIDTNALR.[V]	2xAcetyl:2H(3) [K3; K5]; 1xAcetyl:2H(3) [N-Term]	O96019 2xAcetyl:2H(3) [K60; K62]; 1xAcetyl:2H(3) [N-Term]	FALSE		0.000284341	0	1	1	8	O96019	O96019 [58-76]	0	2189.12	0	0.424	-1.24	0.73058	0.82	0.411	3.531	0.424	-1.28	1.82	-1.24	140.5	59.5	14.07	112.47	3	3	95.2	73.3	94	39.1	258.7	39.8	1	1	1	1	1	1	95.2	73.3	94	39.1	258.7
FALSE	High	[R].GDPECHLFYNEQQEAR.[G]	1xCarbamidomethyl [C5]; 1xAcetyl:2H(3) [N-Term]	P18065 1xCarbamidomethyl [C306]; 1xAcetyl:2H(3) [N-Term]	FALSE		0.000244322	0	1	1	29	P18065	P18065 [302-317]	0	2037.88	0	1.829	0.87	0.645634	5.89	1.393	1.829	1.902	0.48	0.87	0.93	68.9	131.1	40.92	24.21	3	3	110.8	51.5	65.3	154.2	94.1	124.1	1	1	1	1	1	1	110.8	51.5	65.3	154.2	94.1
FALSE	High	[H].GDTAKKPIIGILMQKCR.[N]	1xCarbamidomethyl [C16]; 3xAcetyl:2H(3) [K5; K6; K15]; 1xAcetyl:2H(3) [N-Term]	Q92820 1xCarbamidomethyl [C43]; 3xAcetyl:2H(3) [K32; K33; K42]; 1xAcetyl:2H(3) [N-Term]	FALSE		0.000123456	0	1	1	19	Q92820	Q92820 [28-44]	0	2109.19	0	0.425	-1.23	0.590576	1.85	0.454	0.283	0.425	-1.14	-1.82	-1.23	152.9	47.1	22.19	25.1	3	3	156.3	169.9	108.6	71	48.1	46.2	1	1	1	1	1	1	156.3	169.9	108.6	71	48.1
FALSE	High	[M].GDVKNFLYAWCGKR.[K]	1xAcetyl [N-Term]; 1xCarbamidomethyl [C11]; 2xAcetyl:2H(3) [K4; K13]	Q08211 1xAcetyl [N-Term]; 1xCarbamidomethyl [C12]; 2xAcetyl:2H(3) [K5; K14]	FALSE		0.000986154	0	1	1	13	Q08211	Q08211 [2-15]	0	1845.92	0	4.097	2.03	0.474987	43.17	2.904	8.865	4.097	1.54	3.15	2.03	46.6	153.4	19.52	77.32	3	3	30.4	36.2	24.4	88.2	321	99.9	1	1	1	1	1	1	30.4	36.2	24.4	88.2	321
FALSE	High	[R].GDVVPKDVNAAIATIKTKR.[TS]	3xAcetyl:2H(3) [K6; K16; K18]	P68363 3xAcetyl:2H(3) [K326; K336; K338]	FALSE		0.0039453	0	1	5	4	P68363	P68363 [321-339]	0	2131.24	0	1.815	0.86	0.955854	104.23	0.539	3.75	1.815	-0.89	1.91	0.86	53.1	146.9	120.82	34.17	3	3	244	26.2	35.5	131.5	98.3	64.5	1	1	1	1	1	1	244	26.2	35.5	131.5	98.3
FALSE	High	[R].GEAHLAVNDFELAR.[A]	1xAcetyl:2H(3) [N-Term]	Q02790 1xAcetyl:2H(3) [N-Term]	FALSE		0.000219709	0	1	1	9	Q02790	Q02790 [360-373]	0	1586.8	0	1.419	0.5	0.932493	56.83	0.875	4.169	1.419	-0.19	2.06	0.5	92.4	107.6	58.82	15.3	3	3	118.4	27.3	97.9	103.6	113.9	138.9	1	1	1	1	1	1	118.4	27.3	97.9	103.6	113.9
FALSE	High	[R].GEEGHDPKEPEQLR.[K]	1xAcetyl:2H(3) [K8]; 1xAcetyl:2H(3) [N-Term]	P51991 1xAcetyl:2H(3) [K29]; 1xAcetyl:2H(3) [N-Term]	FALSE		0.00291435	0	1	1	36	P51991	P51991 [22-35]	0	1710.82	0	1.513	0.6	0.927269	83.74	0.596	1.513	2.367	-0.75	0.6	1.24	60.1	139.9	89.25	30.02	3	3	198.9	44.1	51	118.6	66.7	120.7	1	1	1	1	1	1	198.9	44.1	51	118.6	66.7
FALSE	High	[D].GEEQNKEALQDVEDENQ.[-]	1xAcetyl:2H(3) [K6]	P62258 1xAcetyl:2H(3) [K244]	FALSE		1.94003e-05	0	1	1	10	P62258	P62258 [239-255]	0	2019.88	0	1.412	0.5	0.989068	12.44	1.412	0.96	1.531	0.5	-0.06	0.61	81.2	118.8	110.2	87.7	3	3	35.7	218.1	34.1	50.4	209.3	52.3	1	1	1	1	1	1	35.7	218.1	34.1	50.4	209.3
FALSE	High	[A].GEPKCPLMVKVLDAVR.[G]	1xCarbamidomethyl [C5]; 2xAcetyl:2H(3) [K4; K10]; 1xAcetyl:2H(3) [N-Term]	O46375 1xCarbamidomethyl [C30]; 2xAcetyl:2H(3) [K29; K35]; 1xAcetyl:2H(3) [N-Term]	TRUE	FBS	0.000351615	0	1	1	12	O46375	O46375 [26-41]	0	1947.08	0	0.941	-0.09	0.975159	28.89	6.654	0.734	0.941	2.73	-0.45	-0.09	53.9	146.1	100.41	51.32	3	3	23.6	185.6	50.3	157	136.2	47.3	1	1	1	1	1	1	23.6	185.6	50.3	157	136.2
FALSE	High	[L].GETNPADSKPGTIR.[G]	1xAcetyl:2H(3) [K9]	P15531 1xAcetyl:2H(3) [K100]; P22392 1xAcetyl:2H(3) [K100]	FALSE		0.00156583	0	2	3	7	P15531; P22392	P15531 [92-105]; P22392 [92-105]	0	1487.75	0	0.807	-0.31	0.955854	20.92		1.001	0.651		0	-0.62	110.7	89.3	40.02	65.99	2	2		205.2	114.7		205.4	74.7		1	1		1	1		205.2	114.7		205.4
FALSE	High	[R].GFAFVTFESPADAKDAAR.[D]	1xAcetyl:2H(3) [K14]	P38159 1xAcetyl:2H(3) [K63]	FALSE		7.95186e-05	0	1	2	4	P38159	P38159 [50-67]	0	1944.95	0	2.478	1.31	0.868646	4.9	1.169	2.56	2.478	0.23	1.36	1.31	70.7	129.3	34.71	21.19	3	3	94.4	46.9	65.6	110.4	120.1	162.6	1	1	1	1	1	1	94.4	46.9	65.6	110.4	120.1
FALSE	High	[R].GFDQDMANKIGEHMEEHGIKFIR.[Q]	2xAcetyl:2H(3) [K9; K20]; 1xAcetyl:2H(3) [N-Term]	Q16881 2xAcetyl:2H(3) [K385; K396]; 1xAcetyl:2H(3) [N-Term]	FALSE		0.000330915	0	1	1	1	Q16881	Q16881 [377-399]	0	2837.37	0	1.223	0.29	0.992688	37.3	100	0.915	1.223	6.64	-0.13	0.29	102.6	97.4	5.17	85.11	2	3		149.8	139.2	3.6	137.1	170.3		1	1	1	1	1		149.8	139.2	3.6	137.1
FALSE	High	[R].GFGFVTFDDHDPVDKIVLQKYHTINGHNAEVR.[K]	2xAcetyl:2H(3) [K15; K20]	P22626 2xAcetyl:2H(3) [K168; K173]	FALSE		0.000321027	0	1	1	3	P22626	P22626 [154-185]	0	3758.88	0	100	6.64	1.64805e-16	0	100	100	0.01	6.64	6.64	-6.64	21.9	178.1		20.03	1	2			34.4	322.8	242.7				1	1	1				34.4	322.8	242.7
FALSE	High	[R].GFGFVTFDDHDPVDKIVLQKYHTINGHNAEVR.[K]	2xAcetyl:2H(3) [K15; K20]; 1xAcetyl:2H(3) [N-Term]	P22626 2xAcetyl:2H(3) [K168; K173]; 1xAcetyl:2H(3) [N-Term]	FALSE		7.46069e-06	0	1	1	19	P22626	P22626 [154-185]	0	3803.91	0	4.664	2.22	0.0918521	13.22	5.079	1.506	4.664	2.34	0.59	2.22	38.7	161.3	71.66	16.72	3	3	34.4	95.1	27	174.6	143.1	125.8	1	1	1	1	1	1	34.4	95.1	27	174.6	143.1
FALSE	High	[R].GFGFVTYATVEEVDAAMNAR.[P]	1xAcetyl:2H(3) [N-Term]	P09651 1xAcetyl:2H(3) [N-Term]	FALSE		0.000330915	0	1	1	25	P09651	P09651 [56-75]	0	2193.04	0	4.12	2.04	0.0592691	5.57	4.274	2.014	4.12	2.1	1.01	2.04	39.1	160.9	71	25.73	3	3	26.4	93.7	34.9	112.8	188.7	143.6	1	1	1	1	1	1	26.4	93.7	34.9	112.8	188.7
FALSE	High	[R].GFGFVTYATVEEVDAAMNAR.[P]	1xOxidation [M17]; 1xAcetyl:2H(3) [N-Term]	P09651 1xOxidation [M72]; 1xAcetyl:2H(3) [N-Term]	FALSE		0.00302682	0	1	1	1	P09651	P09651 [56-75]	0	2209.03	0	1.988	0.99	0.954559	56.49	0.641	2.746	1.988	-0.64	1.46	0.99	101.8	98.2	51.23	67.86	3	3	93.3	32.8	108.5	59.8	90	215.7	1	1	1	1	1	1	93.3	32.8	108.5	59.8	90
FALSE	High	[R].GFGFVTYATVEEVDAAMNARPH.[K]	1xAcetyl:2H(3) [N-Term]	P09651 1xAcetyl:2H(3) [N-Term]	FALSE		0.000767871	0	1	1	23	P09651	P09651 [56-77]	0	2427.15	0	2.539	1.34	0.694249	21.17	2.902	1.709	2.539	1.54	0.77	1.34	56.5	143.5	59.88	38.9	3	3	26.1	102.3	62.4	75.9	174.8	158.5	1	1	1	1	1	1	26.1	102.3	62.4	75.9	174.8
FALSE	High	[R].GFGFVTYATVEEVDAAMNARPHKVDGR.[V]	1xAcetyl:2H(3) [K23]	P09651 1xAcetyl:2H(3) [K78]	FALSE		0.00262115	0	1	1	2	P09651	P09651 [56-82]	0	2982.46	0	1.784	0.84	0.961246	8.53	1.682	2.214	1.784	0.75	1.15	0.84	62.2	137.8	80.61	70.82	3	3	135	51.8	25.6	227	114.8	45.7	1	1	1	1	1	1	135	51.8	25.6	227	114.8
FALSE	High	[R].GKMSSYAFFVQTCR.[E]	1xCarbamidomethyl [C13]; 1xOxidation [M3]; 1xAcetyl:2H(3) [K2]	P26583 1xCarbamidomethyl [C23]; 1xOxidation [M13]; 1xAcetyl:2H(3) [K12]; P09429 1xCarbamidomethyl [C23]; 1xOxidation [M13]; 1xAcetyl:2H(3) [K12]	FALSE		0.000537663	0	2	3	2	P26583; P09429	P26583 [11-24]; P09429 [11-24]	0	1742.81	0	0.916	-0.13	0.947183	107.86	0.122	5.076	0.916	-3.04	2.34	-0.13	104.3	95.7	138.04	7.36	3	3	389.2	10.6	51.7	47.5	53.7	47.4	1	1	1	1	1	1	389.2	10.6	51.7	47.5	53.7
FALSE	High	[R].GKMSSYAFFVQTCR.[E]	1xCarbamidomethyl [C13]; 1xAcetyl:2H(3) [K2]; 1xAcetyl:2H(3) [N-Term]	P26583 1xCarbamidomethyl [C23]; 1xAcetyl:2H(3) [K12]; 1xAcetyl:2H(3) [N-Term]; P09429 1xCarbamidomethyl [C23]; 1xAcetyl:2H(3) [K12]; 1xAcetyl:2H(3) [N-Term]	FALSE		0.000409206	0	2	3	26	P26583; P09429	P26583 [11-24]; P09429 [11-24]	0	1771.84	3	1.341	0.42	0.894357	22.24	1.341	1.1	1.542	0.42	0.14	0.63	85.4	114.6	35.23	20.89	3	3	91.3	116.9	55.3	122.5	128.6	85.3	1	1	1	1	1	1	91.3	116.9	55.3	122.5	128.6
FALSE	High	[R].GKMSSYAFFVQTCR.[E]	1xCarbamidomethyl [C13]; 1xOxidation [M3]; 1xAcetyl:2H(3) [K2]; 1xAcetyl:2H(3) [N-Term]	P26583 1xCarbamidomethyl [C23]; 1xOxidation [M13]; 1xAcetyl:2H(3) [K12]; 1xAcetyl:2H(3) [N-Term]; P09429 1xCarbamidomethyl [C23]; 1xOxidation [M13]; 1xAcetyl:2H(3) [K12]; 1xAcetyl:2H(3) [N-Term]	FALSE		0.00230444	0	2	3	10	P26583; P09429	P26583 [11-24]; P09429 [11-24]	0	1787.84	0	0.926	-0.11	0.99284	30.39	0.338	0.926	1.147	-1.57	-0.11	0.2	116.5	83.5	58.93	32.34	3	3	201.2	66.2	94.7	68	61.3	108.7	1	1	1	1	1	1	201.2	66.2	94.7	68	61.3
FALSE	High	[N].GKTSKKITIADCGQLE.[-]	1xCarbamidomethyl [C12]; 3xAcetyl:2H(3) [K2; K5; K6]	P62937 1xCarbamidomethyl [C161]; 3xAcetyl:2H(3) [K151; K154; K155]	FALSE		0.000333435	0	1	1	5	P62937	P62937 [150-165]	0	1884.01	0	1.397	0.48	0.998244	32.57	1.397	1.703	1.069	0.48	0.77	0.1	83.5	116.5	84.35	101.9	3	3	43.7	154.9	37	61.1	263.9	39.5	1	1	1	1	1	1	43.7	154.9	37	61.1	263.9
FALSE	High	[R].GQIKQKKKTVPQKVTIAKIPR.[A]	6xAcetyl:2H(3) [K4; K6; K7; K8; K13; K18]; 1xAcetyl:2H(3) [N-Term]	O43583 6xAcetyl:2H(3) [K105; K107; K108; K109; K114; K119]; 1xAcetyl:2H(3) [N-Term]	FALSE		0.000554222	0	1	1	16	O43583	O43583 [102-122]	0	2704.72	0	1.122	0.17	0.968478	23.26	1.122	1.817	0.946	0.17	0.86	-0.08	99.7	100.3	35.54	9.92	3	3	106.8	54.1	113.5	119.8	98.4	107.4	1	1	1	1	1	1	106.8	54.1	113.5	119.8	98.4
FALSE	High	[R].GQTCVVHYTGMLEDGKKFDSSR.[D]	1xCarbamidomethyl [C4]; 2xAcetyl:2H(3) [K16; K17]; 1xAcetyl:2H(3) [N-Term]	P62942 1xCarbamidomethyl [C23]; 2xAcetyl:2H(3) [K35; K36]; 1xAcetyl:2H(3) [N-Term]	FALSE		0.000659824	0	1	1	6	P62942	P62942 [20-41]	0	2650.26	0	1.636	0.71	0.986008	92.45	1.636	0.591	2.656	0.71	-0.76	1.41	54.7	145.3	112.11	45.42	3	3	30.2	232.1	41.4	49.4	137.1	109.9	1	1	1	1	1	1	30.2	232.1	41.4	49.4	137.1
FALSE	High	[R].GRDYEKDKVCKDLASLGR.[D]	1xCarbamidomethyl [C10]; 3xAcetyl:2H(3) [K6; K8; K11]; 1xAcetyl:2H(3) [N-Term]	F1N5M2 1xCarbamidomethyl [C29]; 3xAcetyl:2H(3) [K25; K27; K30]; 1xAcetyl:2H(3) [N-Term]	TRUE	FBS	8.64374e-05	0	1	1	27	F1N5M2	F1N5M2 [20-37]	1	2290.19	0	0.941	-0.09	0.998039	74.61	2.966	0.941	0.406	1.57	-0.09	-1.3	103.1	96.9	13.64	88.39	3	3	77.7	79	98.4	230.6	74.3	39.9	1	1	1	1	1	1	77.7	79	98.4	230.6	74.3
FALSE	High	[M].GSEAAQLLEAADFAAR.[K]	1xAcetyl [N-Term]	Q8N4P3 1xAcetyl [N-Term]	FALSE		0.000393979	0	1	1	15	Q8N4P3	Q8N4P3 [2-17]	0	1661.81	0	1.379	0.46	0.940094	28.55	1.113	2.059	1.379	0.16	1.04	0.46	84.1	115.9	55.63	28.41	3	3	137.5	46.8	69.9	153.1	96.3	96.4	1	1	1	1	1	1	137.5	46.8	69.9	153.1	96.3
FALSE	High	[R].GSSAGGLQHLVSIR.[T]	1xAcetyl:2H(3) [N-Term]	P10586 1xAcetyl:2H(3) [N-Term]	FALSE		0.00068532	0	1	1	7	P10586	P10586 [1081-1094]	0	1426.78	0	1.397	0.48	0.972143	21.71	1.193	1.397	2.048	0.25	0.48	1.03	71.6	128.4	17.28	29.13	3	3	68.7	94.2	73.3	81.9	131.7	150.2	1	1	1	1	1	1	68.7	94.2	73.3	81.9	131.7
FALSE	High	[R].GSTGVAAAAGLHR.[Y]	1xAcetyl:2H(3) [N-Term]	P54802 1xAcetyl:2H(3) [N-Term]	FALSE		0.000479853	0	1	1	10	P54802	P54802 [79-91]	0	1212.65	0	0.371	-1.43	0.486742	6.06	0.371	0.261	0.514	-1.43	-1.94	-0.96	155.2	44.8	38.33	51.79	3	3	81.7	185.8	167.6	30.3	48.5	86.1	1	1	1	1	1	1	81.7	185.8	167.6	30.3	48.5
FALSE	High	[A].GSVGAGEPKCPLMVKVLDAVR.[G]	1xCarbamidomethyl [C10]; 2xAcetyl:2H(3) [K9; K15]; 1xAcetyl:2H(3) [N-Term]	O46375 1xCarbamidomethyl [C30]; 2xAcetyl:2H(3) [K29; K35]; 1xAcetyl:2H(3) [N-Term]	TRUE	FBS	6.83268e-05	0	1	1	56	O46375	O46375 [21-41]	0	2318.26	0	0.925	-0.11	0.998323	12.81	6.169	0.831	0.925	2.62	-0.27	-0.11	48.6	151.4	99.7	53.04	3	3	24.5	181.1	48.3	150.9	150.5	44.7	1	1	1	1	1	1	24.5	181.1	48.3	150.9	150.5
FALSE	High	[A].GSVGAGEPKCPLMVKVLDAVR.[G]	1xCarbamidomethyl [C10]; 1xOxidation [M13]; 2xAcetyl:2H(3) [K9; K15]; 1xAcetyl:2H(3) [N-Term]	O46375 1xCarbamidomethyl [C30]; 1xOxidation [M33]; 2xAcetyl:2H(3) [K29; K35]; 1xAcetyl:2H(3) [N-Term]	TRUE	FBS	0.00371344	0	1	1	15	O46375	O46375 [21-41]	0	2334.25	0	1.426	0.51	0.951946	98.56	2.373	0.459	1.426	1.25	-1.12	0.51	86.8	113.2	66.01	38.56	3	3	62.7	170.8	57.4	148.8	78.4	81.8	1	1	1	1	1	1	62.7	170.8	57.4	148.8	78.4
FALSE	High	[R].GTGDVKLLKHKEKGAIR.[L]	4xAcetyl:2H(3) [K6; K9; K11; K13]; 1xAcetyl:2H(3) [N-Term]	P43487 4xAcetyl:2H(3) [K76; K79; K81; K83]; 1xAcetyl:2H(3) [N-Term]	FALSE		2.45424e-05	0	1	1	49	P43487	P43487 [71-87]	0	2075.24	0	0.504	-0.99	0.698531	15.59	0.504	1.39	0.295	-0.99	0.47	-1.76	133	67	46.36	25.57	3	3	137.6	65.1	183.4	69.3	90.5	54.1	1	1	1	1	1	1	137.6	65.1	183.4	69.3	90.5
FALSE	High	[R].GTGGVDTAATGGVFDISNLDR.[L]			FALSE		0.000128228	0	1	1	6	P12532	P12532 [354-374]	0	2022.97	0	0.515	-0.96	0.722027	26.72	0.165	1.75	0.515	-2.6	0.81	-0.96	138.6	61.4	33.49	99.25	3	3	161.2	101.7	87.5	26.6	178	45.1	1	1	1	1	1	1	161.2	101.7	87.5	26.6	178
FALSE	High	[R].GTGGVDTAATGGVFDISNLDR.[L]	1xAcetyl:2H(3) [N-Term]	P12532 1xAcetyl:2H(3) [N-Term]	FALSE		4.32135e-06	0	1	1	15	P12532	P12532 [354-374]	0	2068	0	0.922	-0.12	0.984394	58.13	0.01	1.347	0.922	-6.64	0.43	-0.12	101.6	98.4	19.63	7.01	3	2	140.2	94	124.5		126.7	114.7	1	1	1		1	1	140.2	94	124.5		126.7
FALSE	High	[R].GTGGVDTAAVGGVFDVSNADR.[L]			FALSE		9.22588e-06	0	1	1	8	P12277	P12277 [321-341]	0	1964.93	0	0.706	-0.5	0.93455	5.64	0.76	0.706	0.452	-0.4	-0.5	-1.14	137.7	62.3	84.24	97.59	3	3	23.2	229.5	115.4	17.6	162.1	52.2	1	1	1	1	1	1	23.2	229.5	115.4	17.6	162.1
FALSE	High	[R].GTGGVDTAAVGGVFDVSNADR.[L]	1xAcetyl:2H(3) [N-Term]	P12277 1xAcetyl:2H(3) [N-Term]	FALSE		0.00017633	0	1	1	14	P12277	P12277 [321-341]	0	2009.96	0	0.348	-1.52	0.268816	17.42	0.01	1.416	0.348	-6.64	0.5	-1.52	126.9	73.1	38.33	39.54	3	2	150.5	81.6	187.1		115.6	65.1	1	1	1		1	1	150.5	81.6	187.1		115.6
FALSE	High	[R].GTKALMDEVVKATSR.[G]	2xAcetyl:2H(3) [K3; K11]	P00558 2xAcetyl:2H(3) [K353; K361]	FALSE		0.000362445	0	1	1	5	P00558	P00558 [351-365]	0	1695.92	0	1.183	0.24	0.984394	94.22	1.183	1.989	0.431	0.24	0.99	-1.21	127.5	72.5	41.42	81.54	3	3	50.2	104.3	124.8	59.4	207.5	53.8	1	1	1	1	1	1	50.2	104.3	124.8	59.4	207.5
FALSE	High	[R].GTKALMDEVVKATSR.[G]	2xAcetyl:2H(3) [K3; K11]; 1xAcetyl:2H(3) [N-Term]	P00558 2xAcetyl:2H(3) [K353; K361]; 1xAcetyl:2H(3) [N-Term]	FALSE		0.00264107	0	1	1	11	P00558	P00558 [351-365]	0	1740.95	0	1.034	0.05	0.999983	77.92	0.491	1.034	1.791	-1.03	0.05	0.84	107.3	92.7	49.32	53.26	3	3	156.3	58.8	88.7	76.7	60.8	158.8	1	1	1	1	1	1	156.3	58.8	88.7	76.7	60.8
FALSE	High	[R].GTKVILHLKEDQTEYLEER.[R]	2xAcetyl:2H(3) [K3; K9]; 1xAcetyl:2H(3) [N-Term]	P08238 2xAcetyl:2H(3) [K180; K186]; 1xAcetyl:2H(3) [N-Term]; Q76LV2 2xAcetyl:2H(3) [K185; K191]; 1xAcetyl:2H(3) [N-Term]	TRUE	FBS	1.78474e-05	0	2	4	31	P08238; Q76LV2	P08238 [178-196]; Q76LV2 [183-201]	0	2436.3	0	2.291	1.2	0.298597	28.74	0.488	2.291	2.735	-1.04	1.2	1.45	62.2	137.8	63.86	34.27	3	3	148.4	53	54.9	72.4	121.4	150	1	1	1	1	1	1	148.4	53	54.9	72.4	121.4
FALSE	High	[R].GVCHIPMAEPFCPKTR.[E]	2xCarbamidomethyl [C3; C12]; 1xAcetyl:2H(3) [K14]; 1xAcetyl:2H(3) [N-Term]	Q13126 2xCarbamidomethyl [C136; C145]; 1xAcetyl:2H(3) [K147]; 1xAcetyl:2H(3) [N-Term]	FALSE		0.000644984	0	1	1	20	Q13126	Q13126 [134-149]	0	1989.96	0	0.906	-0.14	0.984394	64.17	0.906	1.713	0.429	-0.14	0.78	-1.22	83.3	116.7	45.52	68.34	3	3	142.4	92.2	54.9	129.1	157.9	23.5	1	1	1	1	1	1	142.4	92.2	54.9	129.1	157.9
FALSE	High	[R].YYIAASYVKYLESAGAR.[V]	1xAcetyl:2H(3) [K9]	Q92820 1xAcetyl:2H(3) [K62]	FALSE		5.85295e-06	0	1	1	2	Q92820	Q92820 [54-70]	0	1970.01	0	0.056	-4.15	7.19842e-05	1.28		0.316	0.01		-1.66	-6.64	126.5	73.5	76.85		2	1		372.2	110.1		117.7			1	1		1			372.2	110.1		117.7
FALSE	High	[M].GVQVETISPGDGR.[T]	1xAcetyl:2H(3) [N-Term]	P62942 1xAcetyl:2H(3) [N-Term]	FALSE		0.00144059	0	1	1	25	P62942	P62942 [2-14]	0	1359.69	0	1.055	0.08	0.97316	27.18	1.055	1.516	0.862	0.08	0.6	-0.21	95.7	104.3	20.17	27.05	3	3	77.2	90.6	114.7	81.4	137.4	98.8	1	1	1	1	1	1	77.2	90.6	114.7	81.4	137.4
FALSE	High	[RH].GVVDSEDLPLNISR.[E]			TRUE	FBS	0.00110491	0	2	5	4	P08238; Q76LV2	P08238 [379-392]; Q76LV2 [388-401]	0	1513.79	0	2.518	1.33	0.581046	3.46	1.126	2.518	2.577	0.17	1.33	1.37	59	141	30.21	56.9	3	3	54.7	85.9	50.7	61.6	216.3	130.7	1	1	1	1	1	1	54.7	85.9	50.7	61.6	216.3
FALSE	High	[R].GWEEGVAQMSVGQR.[A]			FALSE		0.000257644	0	1	1	9	P62942	P62942 [59-72]	0	1533.71	0	1.037	0.05	0.982054	61.09	100	0.61	1.037	6.64	-0.71	0.05	124.3	75.7	0.04	77.2	2	3		159	159.1	20	96.9	165		1	1	1	1	1		159	159.1	20	96.9
FALSE	High	[R].GWLKSNVSDAVAQSTR.[I]	1xAcetyl:2H(3) [K4]	P60174 1xAcetyl:2H(3) [K231]	FALSE		2.87799e-05	0	1	1	35	P60174	P60174 [228-243]	0	1763.91	0	0.793	-0.33	0.983626	47.97	0.793	1.201	0.321	-0.33	0.26	-1.64	129.8	70.2	52.2	56.28	3	3	62.3	110.3	186	49.4	132.4	59.6	1	1	1	1	1	1	62.3	110.3	186	49.4	132.4
FALSE	High	[R].GWLKSNVSDAVAQSTR.[I]	1xAcetyl:2H(3) [K4]; 1xAcetyl:2H(3) [N-Term]	P60174 1xAcetyl:2H(3) [K231]; 1xAcetyl:2H(3) [N-Term]	FALSE		7.04315e-05	0	1	1	47	P60174	P60174 [228-243]	0	1808.94	0	0.852	-0.23	0.997389	3.4	1.136	0.852	0.826	0.18	-0.23	-0.28	108	92	58.65	47.18	3	3	54.7	88.1	175.2	62.2	75.1	144.6	1	1	1	1	1	1	54.7	88.1	175.2	62.2	75.1
FALSE	High	[R].GYDELVPHQISVVSEER.[F]	1xAcetyl:2H(3) [N-Term]	P35573 1xAcetyl:2H(3) [N-Term]	FALSE		0.0016891	0	1	1	4	P35573	P35573 [659-675]	0	2002	0	0.671	-0.57	0.917515	59.65	0.671	0.01	1.271	-0.57	-6.64	0.35	113.7	86.3	23.1	67.01	3	2	90.6	144	134.1	60.8		170.4	1	1	1	1		1	90.6	144	134.1	60.8
FALSE	High	[R].GYHKVSLQVHPDR.[V]	1xAcetyl:2H(3) [K4]; 1xAcetyl:2H(3) [N-Term]	Q8WXX5 1xAcetyl:2H(3) [K37]; 1xAcetyl:2H(3) [N-Term]	FALSE		0.00121013	0	1	1	2	Q8WXX5	Q8WXX5 [34-46]	0	1625.87	0	100	6.64	1.64805e-16	0	0.521	100	100	-0.94	6.64	6.64	166.2	33.8		83.79	1	3	331.8			172.8	67.5	27.8	1			1	1	1	331.8			172.8	67.5
FALSE	High	[R].GYKHTLNQIDSVKVWPR.[R]	2xAcetyl:2H(3) [K3; K13]	P12763 2xAcetyl:2H(3) [K57; K67]	TRUE	FBS	0.00154228	0	1	1	7	P12763	P12763 [55-71]	0	2131.16	0	0.659	-0.6	0.882342	6.39	1.292	0.593	0.659	0.37	-0.75	-0.6	120.6	79.4	3.68	42.14	3	3	105	113	108.1	135.7	67	71.2	1	1	1	1	1	1	105	113	108.1	135.7	67
FALSE	High	[R].GYKHTLNQIDSVKVWPR.[R]	2xAcetyl:2H(3) [K3; K13]; 1xAcetyl:2H(3) [N-Term]	P12763 2xAcetyl:2H(3) [K57; K67]; 1xAcetyl:2H(3) [N-Term]	TRUE	FBS	2.34506e-05	0	1	1	80	P12763	P12763 [55-71]	0	2176.19	0	1.214	0.28	0.929033	35.01	1.901	0.928	1.214	0.93	-0.11	0.28	90.3	109.7	34.78	70.93	3	3	112.5	57.8	73.2	214	53.6	88.9	1	1	1	1	1	1	112.5	57.8	73.2	214	53.6
FALSE	High	[D].GYLSLLQDSGEVR.[E]			FALSE		0.000290885	0	1	1	5	P63241	P63241 [97-109]	0	1436.74	0	1.899	0.93	0.946401	25.87	100	1.899	1.568	6.64	0.93	0.65	114	86	88.26	127.48	2	3		168.9	39.1	10	320.7	61.3		1	1	1	1	1		168.9	39.1	10	320.7
FALSE	High	[D].GYLSLLQDSGEVR.[E]	1xAcetyl:2H(3) [N-Term]	P63241 1xAcetyl:2H(3) [N-Term]	FALSE		0.000640111	0	1	1	3	P63241	P63241 [97-109]	0	1481.77	0	100	6.64	1.64805e-16	0		100	100		6.64	6.64		200		72.25		2					453.3	146.7					1	1					453.3
FALSE	High	[C].GQAGDASLMELEKR.[K]	1xOxidation [M9]; 1xAcetyl:2H(3) [K13]; 1xAcetyl:2H(3) [N-Term]	Q9P0K1 1xOxidation [M34]; 1xAcetyl:2H(3) [K38]; 1xAcetyl:2H(3) [N-Term]	FALSE		0.000257644	0	1	1	3	Q9P0K1	Q9P0K1 [26-39]	0	1610.8	0	2.727	1.45	0.768903	2716.47	0.074	100		-3.75	6.64		190.7	9.3		56.14	1	2	542.3			40.3	17.4		1			1	1		542.3			40.3	17.4
FALSE	High	[Y].GAKLQPLDFKGNAEQSR.[L]	2xAcetyl:2H(3) [K3; K10]	F1MSZ6 2xAcetyl:2H(3) [K202; K209]	TRUE	FBS	7.5407e-05	0	1	1	2	F1MSZ6	F1MSZ6 [200-216]	0	1949.04	0	0.062	-4.02	0.00252741	1.69		0.379	0.01		-1.4	-6.64	76.2	123.8	126.78		2	1		418.4	22.8		158.7			1	1		1			418.4	22.8		158.7
FALSE	High	[C].GQAGDASLMELEKR.[K]	1xAcetyl:2H(3) [K13]; 1xAcetyl:2H(3) [N-Term]	Q9P0K1 1xAcetyl:2H(3) [K38]; 1xAcetyl:2H(3) [N-Term]	FALSE		0.000431517	0	1	1	9	Q9P0K1	Q9P0K1 [26-39]	0	1594.8	0	0.514	-0.96	0.764382	0.44	0.472	0.52	0.514	-1.08	-0.94	-0.96	131.6	68.4	49.65	44.26	3	3	207.9	114.4	79.3	98.2	59.4	40.8	1	1	1	1	1	1	207.9	114.4	79.3	98.2	59.4
FALSE	High	[R].GPIKFNVWDTAGQEKFGGLR.[D]	2xAcetyl:2H(3) [K4; K15]; 1xAcetyl:2H(3) [N-Term]	P62826 2xAcetyl:2H(3) [K60; K71]; 1xAcetyl:2H(3) [N-Term]	FALSE		6.73938e-07	0	1	1	76	P62826	P62826 [57-76]	0	2355.24	0	1.651	0.72	0.656384	3.41	2.917	1.613	1.651	1.54	0.69	0.72	75.4	124.6	33.29	5.59	3	3	43	86.3	77.8	125.3	139.2	128.4	1	1	1	1	1	1	43	86.3	77.8	125.3	139.2
FALSE	High	[H].GKVEIIANDQGNR.[T]	1xAcetyl:2H(3) [K2]	P54652 1xAcetyl:2H(3) [K26]; P11142 1xAcetyl:2H(3) [K25]; P0DMV9 1xAcetyl:2H(3) [K25]	FALSE		0.000762071	0	3	4	9	P54652; P11142; P0DMV9	P54652 [25-37]; P11142 [24-36]; P0DMV9 [24-36]	0	1458.77	0	1.638	0.71	0.946401	16.62	0.01	1.821	1.638	-6.64	0.86	0.71	62.4	137.6	87.51	41.02	3	2	5.5	134	82		244.1	134.3	1	1	1		1	1	5.5	134	82		244.1
FALSE	High	[H].GKVEIIANDQGNR.[T]	1xAcetyl:2H(3) [K2]; 1xAcetyl:2H(3) [N-Term]	P54652 1xAcetyl:2H(3) [K26]; 1xAcetyl:2H(3) [N-Term]; P11142 1xAcetyl:2H(3) [K25]; 1xAcetyl:2H(3) [N-Term]; P0DMV9 1xAcetyl:2H(3) [K25]; 1xAcetyl:2H(3) [N-Term]	FALSE		0.00172794	0	3	4	2	P54652; P11142; P0DMV9	P54652 [25-37]; P11142 [24-36]; P0DMV9 [24-36]	0	1503.8	0	1.785	0.84	0.925623	20.81	0.01	2.036	1.785	-6.64	1.03	0.84	64.2	135.8	57.98	5.35	3	2	26.1	88.8	109.2		180.8	195	1	1	1		1	1	26.1	88.8	109.2		180.8
FALSE	High	[M].GKVKVGVNGFGR.[I]	2xAcetyl:2H(3) [K2; K4]; 1xAcetyl:2H(3) [N-Term]	P04406 2xAcetyl:2H(3) [K3; K5]; 1xAcetyl:2H(3) [N-Term]	FALSE		0.000986154	0	1	1	388	P04406	P04406 [2-13]	0	1352.8	0	0.829	-0.27	0.99056	43.05	0.829	1.179	0.286	-0.27	0.24	-1.81	116.3	83.7	24.38	51.69	3	3	94.1	108.4	149.1	78	127.8	42.6	1	1	1	1	1	1	94.1	108.4	149.1	78	127.8
FALSE	High	[S].GKYDLDFKSPDDPSR.[Y]	2xAcetyl:2H(3) [K2; K8]	P06733 2xAcetyl:2H(3) [K256; K262]	FALSE		0.000144772	0	1	1	4	P06733	P06733 [255-269]	0	1829.88	0	0.57	-0.81	0.730327	41.56		1.245	0.261		0.32	-1.94	127.4	72.6	13.38	99.62	2	2		182.5	150.9		227.2	39.4		1	1		1	1		182.5	150.9		227.2
FALSE	High	[R].GLAGLGDVAEVR.[K]	1xAcetyl:2H(3) [N-Term]	P11216 1xAcetyl:2H(3) [N-Term]	FALSE		0.0010399	0	1	1	3	P11216	P11216 [18-29]	0	1201.66	0	1.781	0.83	0.952053	22.55	1.51	2.114	1.781	0.59	1.08	0.83	70.1	129.9	34.69	18.52	3	3	102	54.8	62.4	154	115.8	111.1	1	1	1	1	1	1	102	54.8	62.4	154	115.8
FALSE	High	[R].GLFIIDDKGILR.[Q]	1xAcetyl:2H(3) [K8]; 1xAcetyl:2H(3) [N-Term]	Q13162 1xAcetyl:2H(3) [K208]; 1xAcetyl:2H(3) [N-Term]; Q06830 1xAcetyl:2H(3) [K136]; 1xAcetyl:2H(3) [N-Term]	FALSE		0.00196549	0	2	2	32	Q13162; Q06830	Q13162 [201-212]; Q06830 [129-140]	0	1449.86	0	2.111	1.08	0.349252	3.81	1.263	2.165	2.111	0.34	1.11	1.08	66.5	133.5	5.15	26.56	3	3	71.5	66.3	73.3	90.4	143.6	154.8	1	1	1	1	1	1	71.5	66.3	73.3	90.4	143.6
FALSE	High	[R].GIFPVLCKDPVQEAWAEDVDLR.[V]	1xCarbamidomethyl [C7]; 1xAcetyl:2H(3) [K8]; 1xAcetyl:2H(3) [N-Term]	P14618 1xCarbamidomethyl [C474]; 1xAcetyl:2H(3) [K475]; 1xAcetyl:2H(3) [N-Term]	FALSE		0.000101361	0	1	1	12	P14618	P14618 [468-489]	0	2647.33	0	2.853	1.51	0.314297	83.96	1.238	4.569	2.853	0.31	2.19	1.51	47.2	152.8	90.16	24	3	3	136.5	26.8	37.8	168.9	122.3	107.8	1	1	1	1	1	1	136.5	26.8	37.8	168.9	122.3
FALSE	High	[R].GLGHQVATDALVAMEKAMKR.[D]	2xAcetyl:2H(3) [K16; K19]; 1xAcetyl:2H(3) [N-Term]	Q9Y3I0 2xAcetyl:2H(3) [K279; K282]; 1xAcetyl:2H(3) [N-Term]	FALSE		1.98467e-05	0	1	1	5	Q9Y3I0	Q9Y3I0 [264-283]	0	2261.21	0	2.957	1.56	0.42058	11.95	1.678	2.957	3.195	0.75	1.56	1.68	48.6	151.4	42.82	5.32	3	3	88.5	45.1	44	148.4	133.4	140.6	1	1	1	1	1	1	88.5	45.1	44	148.4	133.4
FALSE	High	[R].GLHGICMTFLHNAGKFDAQGKSFIKDALKCKAH.[A]	2xCarbamidomethyl [C6; C30]; 5xAcetyl:2H(3) [K15; K21; K25; K29; K31]; 1xAcetyl:2H(3) [N-Term]	O76061 2xCarbamidomethyl [C85; C109]; 5xAcetyl:2H(3) [K94; K100; K104; K108; K110]; 1xAcetyl:2H(3) [N-Term]	FALSE		0.000566975	0	1	1	2	O76061	O76061 [80-112]	0	3971.04	0	100	6.64	1.64805e-16	0	100	0.227	100	6.64	-2.14	6.64	177.4	22.6		57.57	1	3		421.9		53.8	96	28.3		1		1	1	1		421.9		53.8	96
FALSE	High	[R].GLHGICMTFLHNAGKFDAQGKSFIKDALKCKAHALR.[H]	2xCarbamidomethyl [C6; C30]; 5xAcetyl:2H(3) [K15; K21; K25; K29; K31]; 1xAcetyl:2H(3) [N-Term]	O76061 2xCarbamidomethyl [C85; C109]; 5xAcetyl:2H(3) [K94; K100; K104; K108; K110]; 1xAcetyl:2H(3) [N-Term]	FALSE		1.06559e-05	0	1	1	2	O76061	O76061 [80-115]	0	4311.26	0	0.01	-6.64	1.64805e-16	0	0.01	0.01		-6.64	-6.64		200		113.57		2		59.1	540.9					1	1					59.1	540.9
FALSE	High	[R].GLHGICMTFLHNAGKFDAQGKSFIKDALKCKAHALR.[H]	2xCarbamidomethyl [C6; C30]; 1xOxidation [M7]; 5xAcetyl:2H(3) [K15; K21; K25; K29; K31]; 1xAcetyl:2H(3) [N-Term]	O76061 2xCarbamidomethyl [C85; C109]; 1xOxidation [M86]; 5xAcetyl:2H(3) [K94; K100; K104; K108; K110]; 1xAcetyl:2H(3) [N-Term]	FALSE		0.00363004	0	1	1	1	O76061	O76061 [80-115]	0	4327.26	0
FALSE	High	[R].GLLKTTMDPNDVILATHASVDNLLHLSGLLER.[W]	1xAcetyl:2H(3) [K4]	O43505 1xAcetyl:2H(3) [K87]	FALSE		0.00122862	0	1	1	1	O43505	O43505 [84-115]	0	3501.88	0
FALSE	High	[R].GILLYGPPGTGKTLIAR.[A]	1xAcetyl:2H(3) [K12]; 1xAcetyl:2H(3) [N-Term]	P55072 1xAcetyl:2H(3) [K251]; 1xAcetyl:2H(3) [N-Term]	FALSE		0.00124738	0	1	1	6	P55072	P55072 [240-256]	0	1817.08	0	2.427	1.28	0.534217	9.08	0.71	2.427	2.576	-0.49	1.28	1.37	63	137	62.33	16.11	3	3	138.8	56.3	47.5	98.6	136.6	122.3	1	1	1	1	1	1	138.8	56.3	47.5	98.6	136.6
FALSE	High	[R].GLQYKYLDESSGGWR.[D]	1xAcetyl:2H(3) [K5]; 1xAcetyl:2H(3) [N-Term]	O00115 1xAcetyl:2H(3) [K52]; 1xAcetyl:2H(3) [N-Term]	FALSE		0.000550035	0	1	1	3	O00115	O00115 [48-62]	0	1848.9	0	0.438	-1.19	0.669196	3.9		0.502	0.382		-1	-1.39	139.1	60.9	1.06	20.28	2	2		209.6	206.5		105.2	78.8		1	1		1	1		209.6	206.5		105.2
FALSE	High	[R].GLTSPCKDINTFIHGNKR.[S]	1xCarbamidomethyl [C6]; 2xAcetyl:2H(3) [K7; K17]; 1xAcetyl:2H(3) [N-Term]	P03950 1xCarbamidomethyl [C63]; 2xAcetyl:2H(3) [K64; K74]; 1xAcetyl:2H(3) [N-Term]	FALSE		0.000373609	0	1	1	12	P03950	P03950 [58-75]	0	2193.14	0	1.843	0.88	0.909743	21.99	1.843	0.962	2.117	0.88	-0.06	1.08	70.3	129.7	75.54	33.44	3	3	62	158.7	36	114.4	152.7	76.2	1	1	1	1	1	1	62	158.7	36	114.4	152.7
FALSE	High	[R].GIVGVENVAELKKSFNR.[H]	2xAcetyl:2H(3) [K12; K13]; 1xAcetyl:2H(3) [N-Term]	P06737 2xAcetyl:2H(3) [K29; K30]; 1xAcetyl:2H(3) [N-Term]	FALSE		0.000379319	0	1	1	6	P06737	P06737 [18-34]	0	1995.12	0	100	6.64	1.64805e-16	0	0.933	100	100	-0.1	6.64	6.64	112.3	87.7		31.56	1	3	187.9			175.3	146.7	90.1	1			1	1	1	187.9			175.3	146.7
FALSE	High	[R].GLVVTDLKAESVVLEHR.[S]	1xAcetyl:2H(3) [K8]; 1xAcetyl:2H(3) [N-Term]	Q9BWS9 1xAcetyl:2H(3) [K56]; 1xAcetyl:2H(3) [N-Term]	FALSE		1.82581e-05	0	1	1	13	Q9BWS9	Q9BWS9 [49-65]	0	1955.11	0	0.237	-2.08	0.175171	3.94	0.062	0.237	0.349	-4.01	-2.08	-1.52	161.7	38.3	65.84	32.14	3	3	304.3	110.5	103.9	18.9	26.2	36.2	1	1	1	1	1	1	304.3	110.5	103.9	18.9	26.2
FALSE	High	[R].GIWHNDNKSFLVWVNEEDHLR.[V]	1xAcetyl [N-Term]; 1xAcetyl:2H(3) [K8]	P06732 1xAcetyl [N-Term]; 1xAcetyl:2H(3) [K223]	FALSE		0.00215256	0	1	1	2	P06732	P06732 [216-236]	0	2695.31	0	0.508	-0.98	0.819366	37.43	1.301	0.508	0.01	0.38	-0.98	-6.64	107.1	92.9	36.87	54.34	3	2	132.2	150.8	68.4	172	76.5		1	1	1	1	1		132.2	150.8	68.4	172	76.5
FALSE	High	[R].GIWHNDNKTFLVWVNEEDHLR.[V]	1xAcetyl:2H(3) [K8]; 1xAcetyl:2H(3) [N-Term]	P12277 1xAcetyl:2H(3) [K223]; 1xAcetyl:2H(3) [N-Term]	FALSE		2.51429e-07	0	1	1	120	P12277	P12277 [216-236]	0	2712.34	0	0.752	-0.41	0.972143	15.76	0.94	0.611	0.752	-0.09	-0.71	-0.41	114.2	85.8	37.7	16.5	3	3	77.9	163.5	105.9	73.2	99.9	79.6	1	1	1	1	1	1	77.9	163.5	105.9	73.2	99.9
FALSE	High	[R].GIWHNNEKSFLIWVNEEDHTR.[V]	1xAcetyl:2H(3) [K8]; 1xAcetyl:2H(3) [N-Term]	P12532 1xAcetyl:2H(3) [K256]; 1xAcetyl:2H(3) [N-Term]	FALSE		0.000116188	0	1	1	12	P12532	P12532 [249-269]	0	2714.32	0	0.718	-0.48	0.917515	13.21	1.413	0.718	0.594	0.5	-0.48	-0.75	120.9	79.1	56.5	39.1	3	3	50.5	177.2	109.1	71.3	127.2	64.7	1	1	1	1	1	1	50.5	177.2	109.1	71.3	127.2
FALSE	High	[R].GIYAYGFEKPSAIQQR.[A]	1xAcetyl:2H(3) [K9]; 1xAcetyl:2H(3) [N-Term]	P60842 1xAcetyl:2H(3) [K54]; 1xAcetyl:2H(3) [N-Term]; P38919 1xAcetyl:2H(3) [K60]; 1xAcetyl:2H(3) [N-Term]	FALSE		0.000242476	0	2	3	12	P60842; P38919	P60842 [46-61]; P38919 [52-67]	0	1918	0	1.076	0.11	0.998323	19.54	0.935	2.822	1.076	-0.1	1.5	0.11	59.2	140.8	70.43	41.05	3	3	157	47.1	55.9	146.7	133	60.2	1	1	1	1	1	1	157	47.1	55.9	146.7	133
FALSE	High	[R].GLYCYELDEKAVRPGYPKLIR.[D]	1xCarbamidomethyl [C4]; 2xAcetyl:2H(3) [K10; K18]; 1xAcetyl:2H(3) [N-Term]	Q3ZBS7 1xCarbamidomethyl [C176]; 2xAcetyl:2H(3) [K182; K190]; 1xAcetyl:2H(3) [N-Term]	TRUE	FBS	0.00346882	0	1	1	3	Q3ZBS7	Q3ZBS7 [173-193]	0	2675.42	0	5.085	2.35	0.0834414	1453.98	0.259	100		-1.95	6.64		153.6	46.4		21.94	1	2	372.2			96.2	131.6		1			1	1		372.2			96.2	131.6
FALSE	High	[G].GNLGAQNLSESAAVKEILKEQENR.[K]	2xAcetyl:2H(3) [K15; K19]	Q99497 2xAcetyl:2H(3) [K89; K93]	FALSE		0.000323471	0	1	1	3	Q99497	Q99497 [75-98]	0	2688.41	0	0.575	-0.8	0.750449	25.7		0.951	0.348		-0.07	-1.52	127	73	70.84	110.71	2	2		250.1	83.2		237.8	29		1	1		1	1		250.1	83.2		237.8
FALSE	High	[R].GNNVLYISTQKR.[R]	1xAcetyl:2H(3) [K11]; 1xAcetyl:2H(3) [N-Term]	P62312 1xAcetyl:2H(3) [K77]; 1xAcetyl:2H(3) [N-Term]	FALSE		0.000847411	0	1	1	10	P62312	P62312 [67-78]	0	1482.82	0	1.049	0.07	0.999983	9.83	0.979	1.345	1.049	-0.03	0.43	0.07	85.3	114.7	50.51	51.56	3	3	44.7	96.8	138.9	43.8	130.2	145.7	1	1	1	1	1	1	44.7	96.8	138.9	43.8	130.2
FALSE	High	[R].GNPTVEVDLFTSKGLFR.[A]	1xAcetyl:2H(3) [K13]	P06733 1xAcetyl:2H(3) [K28]	FALSE		1.48772e-05	0	1	1	63	P06733	P06733 [16-32]	0	1925.02	0	0.731	-0.45	0.963859	29.21	0.198	0.731	1.001	-2.33	-0.45	0	123.9	76.1	36.06	45.7	3	3	174.1	132.3	81.1	34.5	96.7	81.2	1	1	1	1	1	1	174.1	132.3	81.1	34.5	96.7
FALSE	High	[R].GNPTVEVDLFTSKGLFR.[A]	1xAcetyl [N-Term]; 1xAcetyl:2H(3) [K13]	P06733 1xAcetyl [N-Term]; 1xAcetyl:2H(3) [K28]	FALSE		0.0038567	0	1	1	8	P06733	P06733 [16-32]	0	1967.03	0	0.721	-0.47	0.947183	13.44	0.389	0.847	0.721	-1.36	-0.24	-0.47	108.3	91.7	23.4	45.41	3	3	101.9	106	152.5	39.6	89.8	110	1	1	1	1	1	1	101.9	106	152.5	39.6	89.8
FALSE	High	[R].GNPTVEVDLFTSKGLFR.[A]	1xAcetyl:2H(3) [K13]; 1xAcetyl:2H(3) [N-Term]	P06733 1xAcetyl:2H(3) [K28]; 1xAcetyl:2H(3) [N-Term]	FALSE		6.8847e-05	0	1	1	26	P06733	P06733 [16-32]	0	1970.05	0	0.832	-0.26	0.987065	11.59	0.658	0.832	0.926	-0.6	-0.26	-0.11	103.8	96.2	26.68	34.04	3	3	89.3	144	97.7	58.8	119.8	90.5	1	1	1	1	1	1	89.3	144	97.7	58.8	119.8
FALSE	High	[N].GPEHWHKDFPIAKGER.[Q]	2xAcetyl:2H(3) [K7; K13]; 1xAcetyl:2H(3) [N-Term]	P00918 2xAcetyl:2H(3) [K18; K24]; 1xAcetyl:2H(3) [N-Term]	FALSE		0.000116188	0	1	1	3	P00918	P00918 [12-27]	0	2039.04	0	0.524	-0.93	0.771782	14.86	0.524	4.459	0.333	-0.93	2.16	-1.59	71.2	128.8	95.76	68.25	3	3	222.3	32.1	64.4	116.6	143.1	21.5	1	1	1	1	1	1	222.3	32.1	64.4	116.6	143.1
FALSE	High	[R].GPGLYYVDSEGNR.[I]	1xAcetyl:2H(3) [N-Term]	P28074 1xAcetyl:2H(3) [N-Term]	FALSE		0.00184989	0	1	1	61	P28074	P28074 [167-179]	0	1471.69	0	0.971	-0.04	0.991057	41.7	0.681	1.62	0.971	-0.55	0.7	-0.04	112.6	87.4	25.17	51.53	3	3	116.4	102.2	69.3	79.3	165.6	67.3	1	1	1	1	1	1	116.4	102.2	69.3	79.3	165.6
FALSE	High	[G].GPMDASVEEEGVR.[R]			FALSE		0.00215256	0	1	1	6	P01034	P01034 [38-50]	0	1375.62	0	0.721	-0.47	0.927269	2.4		0.744	0.699		-0.43	-0.52	116.2	83.8	59.12	62.71	2	2		245.8	100.9		182.9	70.5		1	1		1	1		245.8	100.9		182.9
FALSE	High	[R].GAKEGIILFKEKAKEALGKAKDANNGNLQLR.[N]	6xAcetyl:2H(3) [K3; K10; K12; K14; K19; K21]; 1xAcetyl:2H(3) [N-Term]	P05455 6xAcetyl:2H(3) [K269; K276; K278; K280; K285; K287]; 1xAcetyl:2H(3) [N-Term]	FALSE		0.00274301	0	1	1	2	P05455	P05455 [267-297]	0	3640.08	0	1.321	0.4	0.992781	147.14	0.01	1.321	100	-6.64	0.4	6.64	160.6	39.4	83.15	108.29	2	2	364.1	94.5			124.8	16.6	1	1			1	1	364.1	94.5			124.8
FALSE	High	[R].GAKEGIILFKEKAKEALGKAKDANNGNLQLR.[N]	6xAcetyl:2H(3) [K3; K10; K12; K14; K19; K21]	P05455 6xAcetyl:2H(3) [K269; K276; K278; K280; K285; K287]	FALSE		1.70534e-05	0	1	1	16	P05455	P05455 [267-297]	0	3595.05	0	1.313	0.39	0.966538	25.55	0.404	1.313	1.539	-1.31	0.39	0.62	111.3	88.7	44.16	43.89	3	3	147.6	108.3	56	59.6	142.2	86.3	1	1	1	1	1	1	147.6	108.3	56	59.6	142.2
FALSE	High	[R].GAEIEYAMAYSKAAFER.[E]	1xAcetyl:2H(3) [K12]; 1xAcetyl:2H(3) [N-Term]	Q969H8 1xAcetyl:2H(3) [K125]; 1xAcetyl:2H(3) [N-Term]	FALSE		1.52196e-05	0	1	1	10	Q969H8	Q969H8 [114-130]	0	1996.96	0	1.062	0.09	0.999983	7.2	2.387	1.062	1.011	1.25	0.09	0.02	99.5	100.5	61.84	36.44	3	3	35.7	147	87.6	85.1	156.1	88.5	1	1	1	1	1	1	35.7	147	87.6	85.1	156.1
FALSE	High	[Y].EVFKDLFDPIIEDR.[H]	1xGlu->pyro-Glu [N-Term]; 1xAcetyl:2H(3) [K4]	P12277 1xGlu->pyro-Glu [N-Term]; 1xAcetyl:2H(3) [K86]	FALSE		0.00065484	0	1	1	50	P12277	P12277 [83-96]	0	1762.91	0	0.658	-0.6	0.924956	21.04	0.442	1.096	0.658	-1.18	0.13	-0.6	120.6	79.4	7.54	39.35	3	3	126.3	109.3	113.8	55.9	119.9	74.9	1	1	1	1	1	1	126.3	109.3	113.8	55.9	119.9
FALSE	High	[F].EVHEVYAVDVLVSSGEGKAKDAGQR.[T]	1xGlu->pyro-Glu [N-Term]; 2xAcetyl:2H(3) [K18; K20]	Q9UQ80 1xGlu->pyro-Glu [N-Term]; 2xAcetyl:2H(3) [K236; K238]	FALSE		0.00321586	0	1	1	1	Q9UQ80	Q9UQ80 [219-243]	0	2715.39	0	0.782	-0.36	0.961246	22.92	0.782	1.323	0.584	-0.36	0.4	-0.78	112.3	87.7	23.4	20.49	3	3	104.8	85.3	135.7	81.9	112.9	79.3	1	1	1	1	1	1	104.8	85.3	135.7	81.9	112.9
FALSE	High	[H].EVKAEGYEVAHGGR.[C]	1xGlu->pyro-Glu [N-Term]; 1xAcetyl:2H(3) [K3]	P53041 1xGlu->pyro-Glu [N-Term]; 1xAcetyl:2H(3) [K430]	FALSE		0.00080361	0	1	1	2	P53041	P53041 [428-441]	0	1528.76	0	2.13	1.09	0.857343	8.81	0.653	2.256	2.13	-0.61	1.17	1.09	82.3	117.7	69.17	31	3	3	155.2	37.3	70.9	101.4	84.1	151.1	1	1	1	1	1	1	155.2	37.3	70.9	101.4	84.1
FALSE	High	[F].EVKATAGDTHLGGEDFDNR.[L]	1xGlu->pyro-Glu [N-Term]; 1xAcetyl:2H(3) [K3]	P17066 1xGlu->pyro-Glu [N-Term]; 1xAcetyl:2H(3) [K222]; P0DMV9 1xGlu->pyro-Glu [N-Term]; 1xAcetyl:2H(3) [K220]	FALSE		1.21771e-06	0	2	4	54	P17066; P0DMV9	P17066 [220-238]; P0DMV9 [218-236]	0	2058.96	0	2.648	1.4	0.141519	40.6	1.923	2.648	3.723	0.94	1.4	1.9	59.2	140.8	7.64	33.38	3	3	56.7	48.8	54.3	109	129.1	202.1	1	1	1	1	1	1	56.7	48.8	54.3	109	129.1
FALSE	High	[D].EVKDYVAKGEDVNR.[T]	1xGlu->pyro-Glu [N-Term]; 2xAcetyl:2H(3) [K3; K8]	P58546 1xGlu->pyro-Glu [N-Term]; 2xAcetyl:2H(3) [K19; K24]	FALSE		0.000550035	0	1	1	20	P58546	P58546 [17-30]	0	1693.87	0	0.67	-0.58	0.861719	2.61	0.67	1.541	0.644	-0.58	0.62	-0.64	98.1	101.9	50.37	59.63	3	3	54.4	98	158.3	36.4	151	101.9	1	1	1	1	1	1	54.4	98	158.3	36.4	151
FALSE	High	[L].EVKNLLEKGKTEQQTADQLLAR.[A]	1xGlu->pyro-Glu [N-Term]; 3xAcetyl:2H(3) [K3; K8; K10]	P11047 1xGlu->pyro-Glu [N-Term]; 3xAcetyl:2H(3) [K1322; K1327; K1329]	FALSE		0.00223566	0	1	1	2	P11047	P11047 [1320-1341]	0	2629.45	0	6.124	2.61	0.204894	1205.86	0.375		100	-1.41		6.64	154.4	45.6		33.19	1	2	373.2			140		86.8	1			1		1	373.2			140
FALSE	High	[F].EVKSTAGDTHLGGEDFDNR.[M]	1xGlu->pyro-Glu [N-Term]; 1xAcetyl:2H(3) [K3]	P54652 1xGlu->pyro-Glu [N-Term]; 1xAcetyl:2H(3) [K223]; P11142 1xGlu->pyro-Glu [N-Term]; 1xAcetyl:2H(3) [K220]	FALSE		9.51006e-06	0	2	2	46	P54652; P11142	P54652 [221-239]; P11142 [218-236]	0	2074.95	0	0.933	-0.1	0.998323	28.96	0.724	0.933	1.729	-0.47	-0.1	0.79	84.2	115.8	29.6	33.89	3	3	87.3	128.5	73.7	63.2	120	127.3	1	1	1	1	1	1	87.3	128.5	73.7	63.2	120
FALSE	High	[H].EVLAPGCLDAFPLLSAYVGR.[L]	1xCarbamidomethyl [C7]; 1xGlu->pyro-Glu [N-Term]	P09211 1xCarbamidomethyl [C170]; 1xGlu->pyro-Glu [N-Term]	FALSE		0.00344266	0	1	1	11	P09211	P09211 [164-183]	0	2130.11	0	1.745	0.8	0.963859	19.79	1.979	1.283	1.745	0.98	0.36	0.8	72.8	127.2	78.44	55.85	3	3	35.7	152.6	53	70.5	195.7	92.6	1	1	1	1	1	1	35.7	152.6	53	70.5	195.7
FALSE	High	[F].EVLCKDGTRKPVTDAENCHLAR.[G]	2xCarbamidomethyl [C4; C18]; 1xGlu->pyro-Glu [N-Term]; 2xAcetyl:2H(3) [K5; K10]	G3X6N3 2xCarbamidomethyl [C589; C603]; 1xGlu->pyro-Glu [N-Term]; 2xAcetyl:2H(3) [K590; K595]; Q29443 2xCarbamidomethyl [C589; C603]; 1xGlu->pyro-Glu [N-Term]; 2xAcetyl:2H(3) [K590; K595]	TRUE	FBS	1.96968e-05	0	2	2	1	G3X6N3; Q29443	G3X6N3 [586-607]; Q29443 [586-607]	1	2641.31	0	100	6.64	1.64805e-16	0	100			6.64				200				1				600						1						600
FALSE	High	[R].EVLEKQPVLSQTEAR.[D]	1xGlu->pyro-Glu [N-Term]; 1xAcetyl:2H(3) [K5]	P28070 1xGlu->pyro-Glu [N-Term]; 1xAcetyl:2H(3) [K201]	FALSE		0.00110491	0	1	1	13	P28070	P28070 [197-211]	0	1753.95	0	0.766	-0.39	0.97316	7.87	0.766	2.006	0.696	-0.39	1	-0.52	108.8	91.2	23.01	37.07	3	3	115.4	72.4	105.3	88.3	145.2	73.4	1	1	1	1	1	1	115.4	72.4	105.3	88.3	145.2
FALSE	High	[R].EVLEKQPVLSQTEAR.[D]	1xAcetyl:2H(3) [K5]	P28070 1xAcetyl:2H(3) [K201]	FALSE		0.000550035	0	1	1	26	P28070	P28070 [197-211]	0	1771.96	0	1.114	0.16	0.967863	39.09	1.408	0.627	1.114	0.49	-0.67	0.16	106.8	93.2	35.42	16.74	3	3	64.8	137	104.6	91.2	85.9	116.5	1	1	1	1	1	1	64.8	137	104.6	91.2	85.9
FALSE	High	[R].EVLEKQPVLSQTEAR.[D]	1xAcetyl:2H(3) [K5]; 1xAcetyl:2H(3) [N-Term]	P28070 1xAcetyl:2H(3) [K201]; 1xAcetyl:2H(3) [N-Term]	FALSE		0.000986154	0	1	1	12	P28070	P28070 [197-211]	0	1816.99	0	0.788	-0.34	0.966327	3.44	0.788	2.376	0.758	-0.34	1.25	-0.4	98.3	101.7	49.66	15.37	3	3	105.7	46.7	144.2	83.2	110.9	109.3	1	1	1	1	1	1	105.7	46.7	144.2	83.2	110.9
FALSE	High	[R].EVLIETAKKLGLR.[C]	1xGlu->pyro-Glu [N-Term]; 2xAcetyl:2H(3) [K8; K9]	Q13126 1xGlu->pyro-Glu [N-Term]; 2xAcetyl:2H(3) [K157; K158]	FALSE		0.00349519	0	1	1	27	Q13126	Q13126 [150-162]	0	1541.95	0	1.169	0.23	0.986001	0.05	0.858	1.17	1.169	-0.22	0.23	0.23	103	97	23.19	19.09	3	3	115.6	105.3	72.2	99.2	123.2	84.5	1	1	1	1	1	1	115.6	105.3	72.2	99.2	123.2
FALSE	High	[R].EVLLPKFKLEKDYDLVGALR.[A]	1xGlu->pyro-Glu [N-Term]; 3xAcetyl:2H(3) [K6; K8; K11]	A6QPP2 1xGlu->pyro-Glu [N-Term]; 3xAcetyl:2H(3) [K393; K395; K398]	TRUE	FBS	0.00129556	0	1	1	1	A6QPP2	A6QPP2 [388-407]	0	2463.42	0	7.713	2.95	0.01761	955.38	0.595	100		-0.75	6.64		163.9	36.1		107.36	1	2	357.9			212.9	29.2		1			1	1		357.9			212.9	29.2
FALSE	High	[R].EVLLPKFKLEKDYDLVGALR.[A]	3xAcetyl:2H(3) [K6; K8; K11]	A6QPP2 3xAcetyl:2H(3) [K393; K395; K398]	TRUE	FBS	0.000365205	0	1	1	3	A6QPP2	A6QPP2 [388-407]	0	2481.43	0	8.082	3.01	0.0542781	911.19	0.653	100		-0.61	6.64		181.3	18.7		134.51	1	2	359.4			234.8	5.9		1			1	1		359.4			234.8	5.9
FALSE	High	[R].EVLLPKFKLEKDYDLVGALR.[A]	3xAcetyl:2H(3) [K6; K8; K11]; 1xAcetyl:2H(3) [N-Term]	A6QPP2 3xAcetyl:2H(3) [K393; K395; K398]; 1xAcetyl:2H(3) [N-Term]	TRUE	FBS	0.0010399	0	1	1	1	A6QPP2	A6QPP2 [388-407]	0	2526.46	0	0.638	-0.65	0.91293	0	0.638			-0.65			122.1	77.9			1	1	366.4			233.6			1			1			366.4			233.6
FALSE	High	[S].EVILPVPAFNVINGGSHAGNKLAMQEFMILPVGAANFR.[E]	1xGlu->pyro-Glu [N-Term]; 1xAcetyl:2H(3) [K21]	P06733 1xGlu->pyro-Glu [N-Term]; 1xAcetyl:2H(3) [K162]	FALSE		0.00416	0	1	1	12	P06733	P06733 [142-179]	0	4049.13	0	2.02	1.01	0.400947	49.75	1.313	2.02	2.698	0.39	1.01	1.43	66.2	133.8	31.92	4.77	3	3	93.7	66.2	49.6	123	133.8	133.7	1	1	1	1	1	1	93.7	66.2	49.6	123	133.8
FALSE	High	[S].EVILPVPAFNVINGGSHAGNKLAMQEFMILPVGAANFR.[E]	1xGlu->pyro-Glu [N-Term]; 1xOxidation [M]; 1xAcetyl:2H(3) [K21]	P06733 1xGlu->pyro-Glu [N-Term]; 1xOxidation [M]; 1xAcetyl:2H(3) [K162]	FALSE		0.00213631	0	1	1	22	P06733	P06733 [142-179]	0	4065.13	0	0.609	-0.71	0.850203	12.54	0.47	0.609	1.71	-1.09	-0.71	0.77	120.4	79.6	25.15	66.58	3	3	136.2	85.2	97	64	51.9	165.7	1	1	1	1	1	1	136.2	85.2	97	64	51.9
FALSE	High	[R].EVLPGEIVEISR.[H]			FALSE		0.00225266	0	1	1	19	Q06203	Q06203 [249-260]	0	1340.74	0	1.062	0.09	0.999983	48.77	0.712	1.062	1.846	-0.49	0.09	0.88	79.9	120.1	30.63	37.55	3	3	85.1	124.6	69.3	60.7	132.3	128	1	1	1	1	1	1	85.1	124.6	69.3	60.7	132.3
FALSE	High	[Q].EVISWLDANTLAEKDEFEHKR.[K]	1xGlu->pyro-Glu [N-Term]; 2xAcetyl:2H(3) [K14; K20]	P0DMV9 1xGlu->pyro-Glu [N-Term]; 2xAcetyl:2H(3) [K589; K595]	FALSE		0.000271692	0	1	1	71	P0DMV9	P0DMV9 [576-596]	0	2602.31	0	2.012	1.01	0.406232	31.09	1.342	2.433	2.012	0.42	1.28	1.01	68.1	131.9	14.08	18.48	3	3	76.7	58.3	73.2	102.9	141.8	147.2	1	1	1	1	1	1	76.7	58.3	73.2	102.9	141.8
FALSE	High	[R].EVLTGNDEVIGQVLSTLKSEDVPYTAALTAVRPSR.[V]	1xAcetyl:2H(3) [K18]	Q15904 1xAcetyl:2H(3) [K211]	FALSE		0.00128578	0	1	1	5	Q15904	Q15904 [194-228]	0	3774	0	100	6.64	1.64805e-16	0	100	0.831	100	6.64	-0.27	6.64	109.3	90.7		3.1	1	3		171.6		138.6	142.5	147.4		1		1	1	1		171.6		138.6	142.5
FALSE	High	[M].EVQDAELKALLQSSASR.[K]	1xGlu->pyro-Glu [N-Term]; 1xAcetyl:2H(3) [K8]	Q9UQ80 1xGlu->pyro-Glu [N-Term]; 1xAcetyl:2H(3) [K355]	FALSE		0.00264107	0	1	1	17	Q9UQ80	Q9UQ80 [348-364]	0	1871.99	0	0.733	-0.45	0.954559	16.61	0.58	1.226	0.733	-0.79	0.29	-0.45	114.5	85.5	27.82	15.48	3	3	125.2	76.3	134.1	72.6	93.6	98.2	1	1	1	1	1	1	125.2	76.3	134.1	72.6	93.6
FALSE	High	[L].EVQEPDLAQVLKR.[Y]	1xGlu->pyro-Glu [N-Term]; 1xAcetyl:2H(3) [K12]	O15067 1xGlu->pyro-Glu [N-Term]; 1xAcetyl:2H(3) [K966]	FALSE		0.00207254	0	1	1	2	O15067	O15067 [955-967]	0	1551.86	0	0.821	-0.28	0.968478	9.03	0.896	0.74	0.821	-0.16	-0.43	-0.28	109.8	90.2	45.56	54.16	3	3	162.4	65.1	98.2	145.4	48.2	80.6	1	1	1	1	1	1	162.4	65.1	98.2	145.4	48.2
FALSE	High	[C].EVQHPKGGKTVGTVR.[V]	1xGlu->pyro-Glu [N-Term]; 2xAcetyl:2H(3) [K6; K9]	G5E513 1xGlu->pyro-Glu [N-Term]; 2xAcetyl:2H(3) [K97; K100]	TRUE	FBS	0.00316752	0	1	1	2	G5E513	G5E513 [92-106]	0	1664.93	0	0.899	-0.15	0.972143	10.3	0.976	0.577	0.899	-0.03	-0.79	-0.15	125.5	74.5	38.13	34.99	3	3	62.9	139	135	61.4	80.2	121.4	1	1	1	1	1	1	62.9	139	135	61.4	80.2
FALSE	High	[E].EVQKKNAEQAATQLKVQLQEAER.[R]	1xGlu->pyro-Glu [N-Term]; 3xAcetyl:2H(3) [K4; K5; K15]	Q86UP2 1xGlu->pyro-Glu [N-Term]; 3xAcetyl:2H(3) [K476; K477; K487]	FALSE		8.84266e-05	0	1	1	3	Q86UP2	Q86UP2 [473-495]	0	2756.49	0	11.614	3.54	0.0254669	629.65	1.349		100	0.43		6.64	84.9	115.1		0.62	1	2	161.7			218.2		220.1	1			1		1	161.7			218.2
FALSE	High	[A].EVQKVQLTGEPVPMAR.[C]	1xGlu->pyro-Glu [N-Term]; 1xAcetyl:2H(3) [K4]	P15151 1xGlu->pyro-Glu [N-Term]; 1xAcetyl:2H(3) [K153]	FALSE		0.000509866	0	1	1	13	P15151	P15151 [150-165]	0	1808.98	0	0.608	-0.72	0.808943	19.66	0.388	0.826	0.608	-1.37	-0.28	-0.72	124.4	75.6	53.28	15.67	3	3	207.1	71	113.8	80.4	58.6	69.1	1	1	1	1	1	1	207.1	71	113.8	80.4	58.6
FALSE	High	[D].EVQNEIDRLNEQASEEILKVEQKYNKLR.[Q]	1xGlu->pyro-Glu [N-Term]; 3xAcetyl:2H(3) [K19; K23; K26]	Q01105 1xGlu->pyro-Glu [N-Term]; 3xAcetyl:2H(3) [K68; K72; K75]	FALSE		0.00216893	0	1	1	12	Q01105	Q01105 [50-77]	1	3532.86	0	0.6	-0.74	0.857861	10.02	100	0.488	0.6	6.64	-1.04	-0.74	103.4	96.6	80.8	53.21	2	3		239.7	65.4	138.8	116.9	39.3		1	1	1	1	1		239.7	65.4	138.8	116.9
FALSE	High	[A].EVTFVGHPGNLVIKQR.[F]	1xGlu->pyro-Glu [N-Term]; 1xAcetyl:2H(3) [K14]	P14543 1xGlu->pyro-Glu [N-Term]; 1xAcetyl:2H(3) [K534]	FALSE		0.000597884	0	1	1	17	P14543	P14543 [521-536]	0	1821.02	0	0.836	-0.26	0.984766	33.11	0.497	0.836	1.103	-1.01	-0.26	0.14	95.1	104.9	66.18	27.89	3	3	208.1	69.2	76.8	103.3	57.9	84.7	1	1	1	1	1	1	208.1	69.2	76.8	103.3	57.9
FALSE	High	[F].EVTGLHDVDQGWMR.[A]	1xGlu->pyro-Glu [N-Term]	Q9BWS9 1xGlu->pyro-Glu [N-Term]	FALSE		0.00262115	0	1	1	2	Q9BWS9	Q9BWS9 [122-135]	0	1624.75	0	0.12	-3.06	0.0308509	0	0.12			-3.06			178.6	21.4			1	1	535.9			64.1			1			1			535.9			64.1
FALSE	High	[Y].EVFADLFDPVIQER.[H]	1xGlu->pyro-Glu [N-Term]	P12532 1xGlu->pyro-Glu [N-Term]	FALSE		0.000847411	0	1	1	15	P12532	P12532 [116-129]	0	1659.84	0	0.716	-0.48	0.940182	10.09	0.621	1.242	0.716	-0.69	0.31	-0.48	102.4	97.6	18.7	30.91	3	3	99.2	94.8	132	61.6	117.8	94.5	1	1	1	1	1	1	99.2	94.8	132	61.6	117.8
FALSE	High	[V].EVTKLVTDLTKVHKECCHGDLLECADDR.[A]	3xCarbamidomethyl [C16; C17; C24]; 1xGlu->pyro-Glu [N-Term]; 3xAcetyl:2H(3) [K4; K11; K14]	P02769 3xCarbamidomethyl [C268; C269; C276]; 1xGlu->pyro-Glu [N-Term]; 3xAcetyl:2H(3) [K256; K263; K266]	TRUE	FBS	8.10983e-06	0	1	1	34	P02769	P02769 [253-280]	0	3458.67	0	0.86	-0.22	0.997012	36.81	1.5	0.86	0.571	0.59	-0.22	-0.81	115.1	84.9	9.3	54.24	3	3	107.1	89.9	104.9	160.8	77.3	59.9	1	1	1	1	1	1	107.1	89.9	104.9	160.8	77.3
FALSE	High	[K].EVEQLIKKHEEEEAKAER.[E]	1xGlu->pyro-Glu [N-Term]; 3xAcetyl:2H(3) [K7; K8; K15]	P25789 1xGlu->pyro-Glu [N-Term]; 3xAcetyl:2H(3) [K238; K239; K246]	FALSE		7.95186e-05	0	1	1	18	P25789	P25789 [232-249]	0	2312.21	0	0.645	-0.63	0.908591	5.43	0.645	5.198	0.589	-0.63	2.38	-0.76	91.9	108.1	69.8	51.42	3	3	161.9	31	88.9	104.5	161.4	52.3	1	1	1	1	1	1	161.9	31	88.9	104.5	161.4
FALSE	High	[S].EVELHNMKLVPVVNNR.[L]	1xGlu->pyro-Glu [N-Term]; 1xAcetyl:2H(3) [K8]	Q14118 1xGlu->pyro-Glu [N-Term]; 1xAcetyl:2H(3) [K226]	FALSE		0.000280061	0	1	1	15	Q14118	Q14118 [219-234]	0	1918.04	0	0.754	-0.41	0.929033	54.88	0.754	1.3	0.264	-0.41	0.38	-1.92	120.7	79.3	53.95	67.77	3	3	185	57.3	113.5	139.6	74.5	30	1	1	1	1	1	1	185	57.3	113.5	139.6	74.5
FALSE	High	[R].ETVLQQKETILSQKETIR.[E]	1xGlu->pyro-Glu [N-Term]; 2xAcetyl:2H(3) [K7; K14]	Q15818 1xGlu->pyro-Glu [N-Term]; 2xAcetyl:2H(3) [K69; K76]	FALSE		0.000809726	0	1	1	11	Q15818	Q15818 [63-80]	0	2216.24	0	0.411	-1.28	0.43097	0.64	0.214	0.422	0.411	-2.22	-1.25	-1.28	148	52	41.94	14.99	3	3	222.1	97.9	135.4	47.5	41.3	55.7	1	1	1	1	1	1	222.1	97.9	135.4	47.5	41.3
FALSE	High	[R].ETVLQQKETILSQKETIR.[E]	2xAcetyl:2H(3) [K7; K14]	Q15818 2xAcetyl:2H(3) [K69; K76]	FALSE		0.000114439	0	1	1	16	Q15818	Q15818 [63-80]	0	2234.25	0	0.516	-0.95	0.744518	4.62	0.129	0.516	0.576	-2.95	-0.95	-0.79	126.9	73.1	93.62	7.03	3	3	331.1	72.8	73.5	42.7	37.6	42.3	1	1	1	1	1	1	331.1	72.8	73.5	42.7	37.6
FALSE	High	[R].ETVSEESNVLCLSKSPNKHNR.[L]	1xCarbamidomethyl [C11]; 1xGlu->pyro-Glu [N-Term]; 2xAcetyl:2H(3) [K14; K18]	P13639 1xCarbamidomethyl [C591]; 1xGlu->pyro-Glu [N-Term]; 2xAcetyl:2H(3) [K594; K598]	FALSE		0.00052957	0	1	1	5	P13639	P13639 [581-601]	0	2500.24	0	1.837	0.88	0.908591	39.12	1.352	100	1.837	0.44	6.64	0.88	78.7	121.3	66.29	35.36	2	3	139.3		50.4	188.4	129.3	92.6	1		1	1	1	1	139.3		50.4	188.4	129.3
FALSE	High	[R].ETVVEVPQVTWEDIGGLEDVKR.[E]	1xAcetyl:2H(3) [K21]	P55072 1xAcetyl:2H(3) [K486]	FALSE		7.95186e-05	0	1	1	9	P55072	P55072 [466-487]	0	2543.31	0	3.251	1.7	0.513603	43.68	0.381	3.251	4.209	-1.39	1.7	2.07	52.2	147.8	80.36	52.82	3	3	148.7	38.6	44.3	56.7	125.4	186.4	1	1	1	1	1	1	148.7	38.6	44.3	56.7	125.4
FALSE	High	[R].ETVVQQKETLGAQR.[E]	1xGlu->pyro-Glu [N-Term]; 1xAcetyl:2H(3) [K7]	P47972 1xGlu->pyro-Glu [N-Term]; 1xAcetyl:2H(3) [K74]	FALSE		0.00284888	0	1	1	4	P47972	P47972 [68-81]	0	1613.87	0	0.467	-1.1	0.642886	13.38	0.274	0.467	0.879	-1.87	-1.1	-0.19	142.9	57.1	31.55	52.16	3	3	178.6	96.7	122.7	49	45.2	107.9	1	1	1	1	1	1	178.6	96.7	122.7	49	45.2
FALSE	High	[R].ETVVQQKETLGAQR.[E]	1xAcetyl:2H(3) [K7]	P47972 1xAcetyl:2H(3) [K74]	FALSE		0.000330915	0	1	1	16	P47972	P47972 [68-81]	0	1631.88	0	0.63	-0.67	0.85441	28.86	0.32	0.63	1.265	-1.64	-0.67	0.34	114.4	85.6	58.27	43.72	3	3	207.7	76.5	88.8	66.5	48.1	112.4	1	1	1	1	1	1	207.7	76.5	88.8	66.5	48.1
FALSE	High	[N].ETWGVTKAAEKQMKDKQDEEQR.[L]	1xGlu->pyro-Glu [N-Term]; 4xAcetyl:2H(3) [K7; K11; K14; K16]	P27797 1xGlu->pyro-Glu [N-Term]; 4xAcetyl:2H(3) [K351; K355; K358; K360]	FALSE		1.91082e-05	0	1	1	10	P27797	P27797 [345-366]	0	2797.39	0	0.429	-1.22	0.540526	1.25	0.409	0.608	0.429	-1.29	-0.72	-1.22	124.4	75.6	37.7	35.51	3	3	94.8	118.8	192.8	38.8	72.2	82.6	1	1	1	1	1	1	94.8	118.8	192.8	38.8	72.2
FALSE	High	[R].ETYGDMADCCEKQ.[E]	2xCarbamidomethyl [C9; C10]; 1xAcetyl:2H(3) [K12]	P02769 2xCarbamidomethyl [C114; C115]; 1xAcetyl:2H(3) [K117]	TRUE	FBS	0.00336533	0	1	1	16	P02769	P02769 [106-118]	0	1651.61	0	0.568	-0.82	0.818717	0.7	1.073	0.56	0.568	0.1	-0.84	-0.82	110.8	89.2	28.12	37.76	3	3	106.4	153	89.8	114.1	85.7	51.1	1	1	1	1	1	1	106.4	153	89.8	114.1	85.7
FALSE	High	[R].ETYGDMADCCEKQEPER.[N]	2xCarbamidomethyl [C9; C10]; 1xGlu->pyro-Glu [N-Term]; 1xAcetyl:2H(3) [K12]	P02769 2xCarbamidomethyl [C114; C115]; 1xGlu->pyro-Glu [N-Term]; 1xAcetyl:2H(3) [K117]	TRUE	FBS	0.000190224	0	1	1	57	P02769	P02769 [106-122]	0	2144.84	0	0.93	-0.1	0.998323	63.1	2.011	0.93	0.473	1.01	-0.1	-1.08	103.6	96.4	46.69	20.88	3	3	55.1	107.7	153.5	110.9	100.2	72.6	1	1	1	1	1	1	55.1	107.7	153.5	110.9	100.2
FALSE	High	[R].ETYGDMADCCEKQEPER.[N]	2xCarbamidomethyl [C9; C10]; 1xGlu->pyro-Glu [N-Term]; 1xOxidation [M6]; 1xAcetyl:2H(3) [K12]	P02769 2xCarbamidomethyl [C114; C115]; 1xGlu->pyro-Glu [N-Term]; 1xOxidation [M111]; 1xAcetyl:2H(3) [K117]	TRUE	FBS	0.000669907	0	1	1	30	P02769	P02769 [106-122]	0	2160.83	0	0.532	-0.91	0.743963	5.62	0.532	0.376	0.603	-0.91	-1.41	-0.73	145.4	54.6	23.72	34.72	3	3	96.9	147.5	155.1	51.6	55.4	93.5	1	1	1	1	1	1	96.9	147.5	155.1	51.6	55.4
FALSE	High	[R].ETYGDMADCCEKQEPER.[N]	2xCarbamidomethyl [C9; C10]; 1xAcetyl:2H(3) [K12]	P02769 2xCarbamidomethyl [C114; C115]; 1xAcetyl:2H(3) [K117]	TRUE	FBS	3.89802e-05	0	1	1	130	P02769	P02769 [106-122]	0	2162.85	0	0.682	-0.55	0.939152	11.43	1.003	0.682	0.57	0	-0.55	-0.81	111.4	88.6	25.37	22.22	3	3	88.6	146.9	111.8	88.8	100.3	63.7	1	1	1	1	1	1	88.6	146.9	111.8	88.8	100.3
FALSE	High	[R].ETYGDMADCCEKQEPER.[N]	2xCarbamidomethyl [C9; C10]; 1xOxidation [M6]; 1xAcetyl:2H(3) [K12]	P02769 2xCarbamidomethyl [C114; C115]; 1xOxidation [M111]; 1xAcetyl:2H(3) [K117]	TRUE	FBS	0.000261582	0	1	1	138	P02769	P02769 [106-122]	0	2178.85	0	0.632	-0.66	0.910207	9.14	0.534	0.632	1.196	-0.9	-0.66	0.26	123.7	76.3	2.34	45.33	3	3	114.6	109.3	112	61.2	69.1	133.9	1	1	1	1	1	1	114.6	109.3	112	61.2	69.1
FALSE	High	[R].ETYGDMADCCEKQEPER.[N]	1xAcetyl [N-Term]; 2xCarbamidomethyl [C9; C10]; 1xAcetyl:2H(3) [K12]	P02769 1xAcetyl [N-Term]; 2xCarbamidomethyl [C114; C115]; 1xAcetyl:2H(3) [K117]	TRUE	FBS	0.00438638	0	1	1	9	P02769	P02769 [106-122]	0	2204.86	0	0.733	-0.45	0.940094	4.12	10.658	0.733	0.696	3.41	-0.45	-0.52	115.4	84.6	85.4	59.42	3	3	2.6	152.7	179.6	28.2	112	124.9	1	1	1	1	1	1	2.6	152.7	179.6	28.2	112
FALSE	High	[R].ETYGDMADCCEKQEPER.[N]	2xCarbamidomethyl [C9; C10]; 1xAcetyl:2H(3) [K12]; 1xAcetyl:2H(3) [N-Term]	P02769 2xCarbamidomethyl [C114; C115]; 1xAcetyl:2H(3) [K117]; 1xAcetyl:2H(3) [N-Term]	TRUE	FBS	0.000263573	0	1	1	129	P02769	P02769 [106-122]	0	2207.88	0	1.281	0.36	0.908591	55.69	2.089	0.8	1.281	1.06	-0.32	0.36	86.1	113.9	19.48	29.71	3	3	67.1	94.5	97.6	140.1	75.6	125.1	1	1	1	1	1	1	67.1	94.5	97.6	140.1	75.6
FALSE	High	[R].ETYGDMADCCEKQEPER.[N]	2xCarbamidomethyl [C9; C10]; 1xOxidation [M6]; 1xAcetyl:2H(3) [K12]; 1xAcetyl:2H(3) [N-Term]	P02769 2xCarbamidomethyl [C114; C115]; 1xOxidation [M111]; 1xAcetyl:2H(3) [K117]; 1xAcetyl:2H(3) [N-Term]	TRUE	FBS	5.69558e-05	0	1	1	167	P02769	P02769 [106-122]	0	2223.87	0	0.708	-0.5	0.952053	4.21	0.668	0.708	1.311	-0.58	-0.5	0.39	119.9	80.1	47.12	82.13	3	3	104.9	51.3	145.9	70.1	36.3	191.4	1	1	1	1	1	1	104.9	51.3	145.9	70.1	36.3
FALSE	High	[R].ETYGDMADCCEKQEPERN.[E]	2xCarbamidomethyl [C9; C10]; 1xAcetyl:2H(3) [K12]	P02769 2xCarbamidomethyl [C114; C115]; 1xAcetyl:2H(3) [K117]	TRUE	FBS	0.000597884	0	1	1	29	P02769	P02769 [106-123]	1	2276.89	0	0.815	-0.3	0.980687	19.95	1.497	0.815	0.65	0.58	-0.3	-0.62	94.6	105.4	21.6	42	3	3	92.2	126.2	85.3	138.1	102.8	55.4	1	1	1	1	1	1	92.2	126.2	85.3	138.1	102.8
FALSE	High	[R].ETYGDMADCCEKQEPERN.[E]	2xCarbamidomethyl [C9; C10]; 1xAcetyl:2H(3) [K12]; 1xAcetyl:2H(3) [N-Term]	P02769 2xCarbamidomethyl [C114; C115]; 1xAcetyl:2H(3) [K117]; 1xAcetyl:2H(3) [N-Term]	TRUE	FBS	0.000701088	0	1	1	20	P02769	P02769 [106-123]	1	2321.92	0	1.302	0.38	0.947183	63.21	5.436	0.747	1.302	2.44	-0.42	0.38	84	116	10.55	92.99	3	3	53.1	61.7	65.4	288.5	46.1	85.2	1	1	1	1	1	1	53.1	61.7	65.4	288.5	46.1
FALSE	High	[R].ETYGDMADCCEKQEPERNECFLSHKDD.[S]	3xCarbamidomethyl [C9; C10; C20]; 2xAcetyl:2H(3) [K12; K25]	P02769 3xCarbamidomethyl [C114; C115; C125]; 2xAcetyl:2H(3) [K117; K130]	TRUE	FBS	0.00289236	0	1	1	6	P02769	P02769 [106-132]	1	3453.39	0	0.814	-0.3	0.972143	0		0.814			-0.3		110.3	89.7			1	1		330.8			269.2			1			1			330.8			269.2
FALSE	High	[N].ETYQDISEVVYGAKLQPLDFKGNAEQSR.[L]	1xGlu->pyro-Glu [N-Term]; 2xAcetyl:2H(3) [K14; K21]	F1MSZ6 1xGlu->pyro-Glu [N-Term]; 2xAcetyl:2H(3) [K202; K209]	TRUE	FBS	0.00272231	0	1	1	9	F1MSZ6	F1MSZ6 [189-216]	0	3257.62	0	0.01	-6.64	1.64805e-16	0	0.01	0.242	0.01	-6.64	-2.05	-6.64	161.1	38.9	48.26		3	1	290.5	153	119.6		37		1	1	1		1		290.5	153	119.6		37
FALSE	High	[A].EVAAGDDKKGIVDQSQQAYQEAFEISKKEMQPTHPIR.[L]	1xGlu->pyro-Glu [N-Term]; 4xAcetyl:2H(3) [K8; K9; K27; K28]	P63104 1xGlu->pyro-Glu [N-Term]; 4xAcetyl:2H(3) [K138; K139; K157; K158]	FALSE		4.96877e-05	0	1	1	19	P63104	P63104 [131-167]	0	4334.18	0	2.015	1.01	0.682603	68.48	5.207	1.084	2.015	2.38	0.12	1.01	52.3	147.7	98.93	35.45	3	3	22.8	159.3	42	118.7	172.7	84.6	1	1	1	1	1	1	22.8	159.3	42	118.7	172.7
FALSE	High	[E].EVAGGIEAIVQLINTR.[Q]	1xGlu->pyro-Glu [N-Term]	P68402 1xGlu->pyro-Glu [N-Term]	FALSE		0.00403593	0	1	1	7	P68402	P68402 [113-128]	0	1664.93	0	1.391	0.48	0.986492	8.92	1.499	1.391	1.308	0.58	0.48	0.39	85.4	114.6	12.62	7.08	3	3	71.5	88.5	90.9	107.2	123.1	118.8	1	1	1	1	1	1	71.5	88.5	90.9	107.2	123.1
FALSE	High	[R].EVALDLSQHKGVAVR.[R]	1xGlu->pyro-Glu [N-Term]; 1xAcetyl:2H(3) [K10]	O00391 1xGlu->pyro-Glu [N-Term]; 1xAcetyl:2H(3) [K211]	FALSE		0.00352175	0	1	1	5	O00391	O00391 [202-216]	0	1648.92	0	0.782	-0.35	0.965722	3.32	0.298	0.811	0.782	-1.75	-0.3	-0.35	112.3	87.7	58.84	3.4	3	3	221.3	87.1	87	66	70.6	68	1	1	1	1	1	1	221.3	87.1	87	66	70.6
FALSE	High	[R].EVALNTIIFMGR.[V]			TRUE	FBS	0.00289236	0	1	1	19	F1MSZ6	F1MSZ6 [447-458]	0	1363.74	0	0.554	-0.85	0.742902	17.93	0.336	0.554	1.353	-1.57	-0.85	0.44	112.6	87.4	90.8	34.89	3	3	271.7	81.6	46.8	91.4	45.2	63.3	1	1	1	1	1	1	271.7	81.6	46.8	91.4	45.2
FALSE	High	[R].EVALNTIIFMGR.[V]	1xOxidation [M10]	F1MSZ6 1xOxidation [M456]	TRUE	FBS	0.00233962	0	1	1	20	F1MSZ6	F1MSZ6 [447-458]	0	1379.74	0	0.351	-1.51	0.381804	3.76	0.278	0.351	0.815	-1.85	-1.51	-0.29	110.2	89.8	147.25	123.6	3	3	412	20.9	24.8	114.7	7.3	20.2	1	1	1	1	1	1	412	20.9	24.8	114.7	7.3
FALSE	High	[Q].EVANPEHYIKHPLQNR.[W]	1xGlu->pyro-Glu [N-Term]; 1xAcetyl:2H(3) [K10]	P06730 1xGlu->pyro-Glu [N-Term]; 1xAcetyl:2H(3) [K36]	FALSE		0.00280605	0	1	1	6	P06730	P06730 [27-42]	0	1972.02	0	1.138	0.19	0.997389	109.07	0.301	3.082	1.138	-1.73	1.62	0.19	68.7	131.3	114.4	39.75	3	3	274	37.1	43.2	82.4	114.2	49.1	1	1	1	1	1	1	274	37.1	43.2	82.4	114.2
FALSE	High	[S].EVASGDNKQTTVSNSQQAYQEAFEISKKEMQPTHPIR.[L]	1xGlu->pyro-Glu [N-Term]; 3xAcetyl:2H(3) [K8; K27; K28]	P31946 1xGlu->pyro-Glu [N-Term]; 3xAcetyl:2H(3) [K140; K159; K160]	FALSE		5.04471e-05	0	1	1	3	P31946	P31946 [133-169]	0	4294.1	0	1.489	0.57	0.940182	25.35	1.743	1.489	1.096	0.8	0.57	0.13	74.1	125.9	14.78	31.45	3	3	81.5	93.1	69	142.1	138.5	75.7	1	1	1	1	1	1	81.5	93.1	69	142.1	138.5
FALSE	High	[Q].EVCFTEEGPALISKTR.[A]	1xCarbamidomethyl [C3]; 1xGlu->pyro-Glu [N-Term]; 1xAcetyl:2H(3) [K14]	Q3SZ57 1xCarbamidomethyl [C592]; 1xGlu->pyro-Glu [N-Term]; 1xAcetyl:2H(3) [K603]	TRUE	FBS	0.00289236	0	1	1	13	Q3SZ57	Q3SZ57 [590-605]	0	1863.93	0	0.754	-0.41	0.963074	27.62	1.996	0.754	0.506	1	-0.41	-0.98	117	83	14.41	69.35	3	3	92.3	86.9	113.5	184.3	65.5	57.5	1	1	1	1	1	1	92.3	86.9	113.5	184.3	65.5
FALSE	High	[L].EVDTTLKSLSQQIENIR.[S]	1xGlu->pyro-Glu [N-Term]; 1xAcetyl:2H(3) [K7]	P02452 1xGlu->pyro-Glu [N-Term]; 1xAcetyl:2H(3) [K1236]	TRUE	FBS	0.000418623	0	1	2	3	P02452	P02452 [1230-1246]	0	2001.07	0	6.649	2.73	0.264407	0	6.649			2.73			26.1	173.9			1	1	78.4			521.6			1			1			78.4			521.6
FALSE	High	[G].EVEKEALKKIIEDQQESLNKWKSKGR.[R]	1xGlu->pyro-Glu [N-Term]; 6xAcetyl:2H(3) [K4; K8; K9; K20; K22; K24]	P05455 1xGlu->pyro-Glu [N-Term]; 6xAcetyl:2H(3) [K312; K316; K317; K328; K330; K332]	FALSE		3.7986e-06	0	1	1	24	P05455	P05455 [309-334]	0	3365.86	0	1.275	0.35	0.972143	35.21	0.735	1.275	1.578	-0.44	0.35	0.66	82	118	42.5	9.63	3	3	143.2	73.2	71.8	105.2	93.3	113.2	1	1	1	1	1	1	143.2	73.2	71.8	105.2	93.3
FALSE	High	[S].EVELHNMKLVPVVNNR.[L]	1xGlu->pyro-Glu [N-Term]; 1xOxidation [M7]; 1xAcetyl:2H(3) [K8]	Q14118 1xGlu->pyro-Glu [N-Term]; 1xOxidation [M225]; 1xAcetyl:2H(3) [K226]	FALSE		0.00276387	0	1	1	3	Q14118	Q14118 [219-234]	0	1934.04	0	0.264	-1.92	0.234779	5.49	0.123	0.633	0.264	-3.02	-0.66	-1.92	160.5	39.5	72.69	5.26	3	3	290.6	54.8	145.6	35.9	34.7	38.4	1	1	1	1	1	1	290.6	54.8	145.6	35.9	34.7
FALSE	High	[R].ETSGNLEQLLLAVVKSIR.[S]	1xAcetyl:2H(3) [K15]	P08758 1xAcetyl:2H(3) [K242]	FALSE		9.72892e-06	0	1	1	18	P08758	P08758 [228-245]	0	2015.16	0	0.928	-0.11	0.999983	39.14	100	0.643	0.928	6.64	-0.64	-0.11	129.5	70.5	68.99	83.47	2	3		252.4	86.9	17.7	162.3	80.6		1	1	1	1	1		252.4	86.9	17.7	162.3
FALSE	High	[F].EVTKTAVAHRPGAFKAELSKLVIVAKASR.[T]	1xGlu->pyro-Glu [N-Term]; 4xAcetyl:2H(3) [K4; K15; K20; K26]	Q969H8 1xGlu->pyro-Glu [N-Term]; 4xAcetyl:2H(3) [K145; K156; K161; K167]	FALSE		5.96076e-05	0	1	1	11	Q969H8	Q969H8 [142-170]	0	3239.9	0	3.256	1.7	0.8199	27.09	2.037	3.256	3.851	1.03	1.7	1.95	41.2	158.8	67.71	75.78	3	3	28.1	85.9	30.7	57.2	279.8	118.2	1	1	1	1	1	1	28.1	85.9	30.7	57.2	279.8
FALSE	High	[F].EVVATNGDTHLGGEDFDQR.[V]	1xGlu->pyro-Glu [N-Term]	P11021 1xGlu->pyro-Glu [N-Term]	FALSE		0.0023934	0	1	1	3	P11021	P11021 [243-261]	0	2041.92	0	1.031	0.04	0.975156	79.41	0.479	1.031	1.6	-1.06	0.04	0.68	97.3	102.7	50.2	26.69	3	3	168.4	75.1	76.3	80.6	77.4	122.1	1	1	1	1	1	1	168.4	75.1	76.3	80.6	77.4
FALSE	High	[R].FEVIEFDDGAGSVLR.[I]			FALSE		3.47885e-05	0	1	1	6	P10586	P10586 [78-92]	0	1653.81	0	1.72	0.78	0.80547	2.29	0.403	1.72	1.746	-1.31	0.78	0.8	105.9	94.1	43.45	58.68	3	3	133.3	51.4	99.5	53.7	88.4	173.7	1	1	1	1	1	1	133.3	51.4	99.5	53.7	88.4
FALSE	High	[G].FGAQGPKGGSGSGPTIEEVD.[-]	1xAcetyl:2H(3) [K7]	P0DMV9 1xAcetyl:2H(3) [K628]	FALSE		0.000418623	0	1	1	4	P0DMV9	P0DMV9 [622-641]	0	1934.92	0	2.068	1.05	0.92452	37.97		2.664	1.605		1.41	0.68	65.2	134.8	61.06	86.85	2	2		127.7	50.7		340.2	81.3		1	1		1	1		127.7	50.7		340.2
FALSE	High	[R].FGEVVDCTIKTDPVTGR.[S]	1xCarbamidomethyl [C7]; 1xAcetyl:2H(3) [K10]	O14979 1xCarbamidomethyl [C177]; 1xAcetyl:2H(3) [K180]	FALSE		0.000288687	0	1	1	6	O14979	O14979 [171-187]	0	1938.97	0	2.809	1.49	0.781069	132.63	1.256	6.282		0.33	2.65		52.5	147.5	122.08	65.48	2	2	215	15.8		270.1	99.1		1	1		1	1		215	15.8		270.1	99.1
FALSE	High	[R].FHDFLGDSWGILFSHPR.[D]			FALSE		7.21547e-07	0	1	1	26	P30041	P30041 [25-41]	0	2030.99	0	2.626	1.39	0.452356	55.24	2.626	8.076	1.648	1.39	3.01	0.72	55.2	144.8	40.34	105.22	3	3	39.5	44.9	18.6	103.8	362.4	30.7	1	1	1	1	1	1	39.5	44.9	18.6	103.8	362.4
FALSE	High	[R].FHDLRPDEVADLFQTTQR.[V]			FALSE		5.00659e-05	0	1	1	9	P49789	P49789 [47-64]	0	2188.08	0	0.697	-0.52	0.940512	11.87	0.812	0.553	0.697	-0.3	-0.85	-0.52	117.5	82.5	14.44	30.64	3	3	127.2	98.1	128	103.2	54.3	89.2	1	1	1	1	1	1	127.2	98.1	128	103.2	54.3
FALSE	High	[R].FHMYEGYPLWKVTFPVR.[V]	1xAcetyl:2H(3) [K11]	P00491 1xAcetyl:2H(3) [K95]	FALSE		0.000412321	0	1	1	3	P00491	P00491 [85-101]	0	2215.12	0	100	6.64	1.64805e-16	0	100	24.121	100	6.64	4.59	6.64	58.4	141.6		136.33	1	3		20.6		32.4	497	50		1		1	1	1		20.6		32.4	497
FALSE	High	[R].FHQLDIDDLQSIR.[A]			FALSE		0.000487186	0	1	2	37	P16152	P16152 [59-71]	0	1599.81	0	0.511	-0.97	0.714952	19.65	0.511	1.949	0.252	-0.97	0.96	-1.99	132.4	67.6	15.4	86.42	3	3	119.1	90.9	121.5	60.8	177.1	30.6	1	1	1	1	1	1	119.1	90.9	121.5	60.8	177.1
FALSE	High	[R].FHQLDIDDLQSIR.[A]	1xAcetyl:2H(3) [N-Term]	P16152 1xAcetyl:2H(3) [N-Term]	FALSE		0.000208349	0	1	2	19	P16152	P16152 [59-71]	0	1644.84	0	0.821	-0.28	0.975159	8	0.821	1.178	0.755	-0.28	0.24	-0.41	110.5	89.5	1.9	24.31	3	3	102.6	103.9	106.5	84.2	122.5	80.4	1	1	1	1	1	1	102.6	103.9	106.5	84.2	122.5
FALSE	High	[R].FHVEEEGKGKDASGNKVKA.[E]	4xAcetyl:2H(3) [K8; K10; K16; K18]	P00558 4xAcetyl:2H(3) [K131; K133; K139; K141]	FALSE		0.000248056	0	1	1	8	P00558	P00558 [124-142]	0	2210.15	0	1.8	0.85	0.914729	102.21	0.559	4.757	1.8	-0.84	2.25	0.85	58.4	141.6	20.2	78.51	3	3	56	52.4	75.4	31.3	249.1	135.7	1	1	1	1	1	1	56	52.4	75.4	31.3	249.1
FALSE	High	[R].FHVEEEGKGKDASGNKVKAEPAKIEAFR.[A]	5xAcetyl:2H(3) [K8; K10; K16; K18; K23]	P00558 5xAcetyl:2H(3) [K131; K133; K139; K141; K146]	FALSE		8.76127e-08	0	1	1	515	P00558	P00558 [124-151]	0	3296.74	0	0.392	-1.35	0.380041	6.46	0.281	1.823	0.392	-1.83	0.87	-1.35	136.6	63.4	26.23	77.5	3	3	123.2	84.7	145.9	34.7	154.4	57.2	1	1	1	1	1	1	123.2	84.7	145.9	34.7	154.4
FALSE	High	[R].FHVEEEGKGKDASGNKVKAEPAKIEAFR.[A]	5xAcetyl:2H(3) [K8; K10; K16; K18; K23]; 1xAcetyl:2H(3) [N-Term]	P00558 5xAcetyl:2H(3) [K131; K133; K139; K141; K146]; 1xAcetyl:2H(3) [N-Term]	FALSE		1.62948e-05	0	1	1	46	P00558	P00558 [124-151]	0	3341.77	0	0.371	-1.43	0.316549	1.26	0.371	2.119	0.348	-1.43	1.08	-1.52	143.7	56.3	49.13	43.36	3	3	163.3	53.8	154.6	60.5	114	53.7	1	1	1	1	1	1	163.3	53.8	154.6	60.5	114
FALSE	High	[R].FLDKALELNMLSLKGHR.[S]	2xAcetyl:2H(3) [K4; K14]	Q9Y617 2xAcetyl:2H(3) [K323; K333]	FALSE		2.29231e-05	0	1	1	1	Q9Y617	Q9Y617 [320-336]	0	2075.16	0	0.187	-2.42	0.0795212	0	0.187			-2.42			168.5	31.5			1	1	505.4			94.6			1			1			505.4			94.6
FALSE	High	[R].FLDKALELNMLSLKGHR.[S]	2xAcetyl:2H(3) [K4; K14]; 1xAcetyl:2H(3) [N-Term]	Q9Y617 2xAcetyl:2H(3) [K323; K333]; 1xAcetyl:2H(3) [N-Term]	FALSE		5.36028e-05	0	1	1	16	Q9Y617	Q9Y617 [320-336]	0	2120.19	0	0.818	-0.29	0.967317	11.96	0.997	0.719	0.818	0	-0.47	-0.29	110	90	56.48	44.94	3	3	44.9	170.1	119.8	44.7	122.4	98	1	1	1	1	1	1	44.9	170.1	119.8	44.7	122.4
FALSE	High	[R].FNEVAAQYSEDKAR.[Q]	1xAcetyl:2H(3) [K12]	Q9Y237 1xAcetyl:2H(3) [K75]	FALSE		0.000123456	0	1	1	17	Q9Y237	Q9Y237 [64-77]	0	1672.8	0	1.048	0.07	0.984394	13.35	1.371	0.954	1.048	0.46	-0.07	0.07	99.1	100.9	25.64	17.63	3	3	70.9	95.4	119.8	97.2	91	125.6	1	1	1	1	1	1	70.9	95.4	119.8	97.2	91
FALSE	High	[R].FNEVAAQYSEDKAR.[Q]	1xAcetyl:2H(3) [K12]; 1xAcetyl:2H(3) [N-Term]	Q9Y237 1xAcetyl:2H(3) [K75]; 1xAcetyl:2H(3) [N-Term]	FALSE		0.00142972	0	1	1	13	Q9Y237	Q9Y237 [64-77]	0	1717.83	0	1.718	0.78	0.901928	31.24	2.08	1.718	1.264	1.06	0.78	0.34	64.9	135.1	54.93	34.47	3	3	63	44.4	126	131.1	76.3	159.2	1	1	1	1	1	1	63	44.4	126	131.1	76.3
FALSE	High	[R].FPAEDEFPDLSAHNNHMAKVLTPELYAELR.[A]	1xAcetyl:2H(3) [K19]	P12277 1xAcetyl:2H(3) [K32]	FALSE		0.000321027	0	1	1	10	P12277	P12277 [14-43]	0	3499.7	0	0.514	-0.96	0.77369	1.56	0.514	0.494	0.713	-0.96	-1.02	-0.49	132.1	67.9	84.44	73.69	3	3	92.5	256.3	45	47.6	126.6	32.1	1	1	1	1	1	1	92.5	256.3	45	47.6	126.6
FALSE	High	[R].FPAEDEFPDLSAHNNHMAKVLTPELYAELR.[A]	1xAcetyl:2H(3) [K19]; 1xAcetyl:2H(3) [N-Term]	P12277 1xAcetyl:2H(3) [K32]; 1xAcetyl:2H(3) [N-Term]	FALSE		0.000304428	0	1	1	20	P12277	P12277 [14-43]	0	3544.73	0	0.945	-0.08	0.990722	2.06	0.945	0.421	0.96	-0.08	-1.25	-0.06	106.2	93.8	55.48	13.19	3	3	93.6	196.2	70.9	88.5	82.7	68.1	1	1	1	1	1	1	93.6	196.2	70.9	88.5	82.7
FALSE	High	[R].FPGYDSESKEFNAEVHR.[K]	1xAcetyl:2H(3) [K9]	P46777 1xAcetyl:2H(3) [K188]	FALSE		0.00252373	0	1	1	7	P46777	P46777 [180-196]	0	2056.94	0	0.76	-0.4	0.92424	38.47	0.419	1.284	0.76	-1.25	0.36	-0.4	112.3	87.7	55.72	1.63	3	3	193.3	62.9	103.4	81	80.7	78.6	1	1	1	1	1	1	193.3	62.9	103.4	81	80.7
FALSE	High	[R].FPGYDSESKEFNAEVHR.[K]	1xAcetyl:2H(3) [K9]; 1xAcetyl:2H(3) [N-Term]	P46777 1xAcetyl:2H(3) [K188]; 1xAcetyl:2H(3) [N-Term]	FALSE		0.00080361	0	1	1	15	P46777	P46777 [180-196]	0	2101.97	0	0.532	-0.91	0.820384	1.23	0.532	1.94	0.516	-0.91	0.96	-0.95	111.6	88.4	25.3	70.56	3	3	133.6	89.6	87	71	173.9	44.9	1	1	1	1	1	1	133.6	89.6	87	71	173.9
FALSE	High	[D].FQLIGIQDGYLSLLQDSGEVR.[E]			FALSE		1.22147e-05	0	1	1	4	P63241	P63241 [89-109]	0	2351.22	0	100	6.64	1.64805e-16	0		100			6.64			200				1					600						1						600
FALSE	High	[R].FQNVAKEGVKFDESEKTKESR.[E]	4xAcetyl:2H(3) [K6; K10; K16; K18]	P14625 4xAcetyl:2H(3) [K593; K597; K603; K605]	FALSE		0.00148493	0	1	1	3	P14625	P14625 [588-608]	0	2636.36	0	2.577	1.37	0.714425	129.94	0.318	100	2.577	-1.65	6.64	1.37	90.1	109.9	68.87	45.63	2	3	183.5		63.3	58.4	131.6	163.2	1		1	1	1	1	183.5		63.3	58.4	131.6
FALSE	High	[R].FRIEDSFSVKEQLQDMGLEDLFSPEKSR.[L]	2xAcetyl:2H(3) [K10; K26]	F1MSZ6 2xAcetyl:2H(3) [K365; K381]	TRUE	FBS	0.000756314	0	1	1	5	F1MSZ6	F1MSZ6 [356-383]	1	3420.69	0	0.041	-4.62	1.06381e-05	0.47		0.165	0.01		-2.6	-6.64	131.3	68.7	115.79		2	1		474.3	47.3		78.4			1	1		1			474.3	47.3		78.4
FALSE	High	[R].FSGSKSDTTATLTIR.[G]	1xAcetyl:2H(3) [K5]	F1MLW8 1xAcetyl:2H(3) [K84]	TRUE	FBS	0.00441971	0	1	1	3	F1MLW8	F1MLW8 [80-94]	0	1629.85	0	0.426	-1.23	0.470677	26.24	100	0.426	0.01	6.64	-1.23	-6.64	106.3	93.7	30.92	66.05	2	2		185.3	118.8	217.1	78.9			1	1	1	1			185.3	118.8	217.1	78.9
FALSE	High	[R].FSGWYDADLSPAGHEEAKR.[G]	1xAcetyl:2H(3) [K18]	P18669 1xAcetyl:2H(3) [K39]	FALSE		0.000130188	0	1	1	2	P18669	P18669 [22-40]	0	2181.01	0	1.617	0.69	0.984472	130.55	1.617	4.096	0.193	0.69	2.03	-2.37	80.1	119.9	44.88	95.78	3	3	56.3	60.8	119.8	90.9	249.1	23.1	1	1	1	1	1	1	56.3	60.8	119.8	90.9	249.1
FALSE	High	[R].FSGWYDADLSPAGHEEAKR.[G]	1xAcetyl:2H(3) [K18]; 1xAcetyl:2H(3) [N-Term]	P18669 1xAcetyl:2H(3) [K39]; 1xAcetyl:2H(3) [N-Term]	FALSE		0.000379319	0	1	1	1	P18669	P18669 [22-40]	0	2226.04	0	0.759	-0.4	0.90905	84.34	0.01	1.867	0.759	-6.64	0.9	-0.4	87.8	112.2	39.58	67.68	3	2	52.7	124.6	108		232.6	82	1	1	1		1	1	52.7	124.6	108		232.6
FALSE	High	[D].FSLADAINTEFKNTR.[T]	1xAcetyl:2H(3) [K12]; 1xAcetyl:2H(3) [N-Term]	P08670 1xAcetyl:2H(3) [K97]; 1xAcetyl:2H(3) [N-Term]	FALSE		0.000132178	0	1	1	36	P08670	P08670 [86-100]	0	1816.93	0	2.949	1.56	0.212596	58.86	0.746	4.12	2.949	-0.42	2.04	1.56	61.7	138.3	67.64	43.38	3	3	121.7	47.7	36.3	90.8	196.6	106.9	1	1	1	1	1	1	121.7	47.7	36.3	90.8	196.6
FALSE	High	[R].FVTKINMNGVNSSNGVVDPR.[A]	1xAcetyl:2H(3) [K4]	Q13404 1xAcetyl:2H(3) [K87]	FALSE		0.000143678	0	1	1	1	Q13404	Q13404 [84-103]	0	2193.12	0	1.931	0.95	0.940297	24.59	1.61	5.982	1.931	0.69	2.58	0.95	74.7	125.3	67.28	32.02	3	3	91.9	14.5	88.3	148	86.9	170.5	1	1	1	1	1	1	91.9	14.5	88.3	148	86.9
FALSE	High	[R].FVYTPAMESVCGYFHR.[S]	1xCarbamidomethyl [C11]	P01033 1xCarbamidomethyl [C93]	FALSE		0.00455557	0	1	1	6	P01033	P01033 [83-98]	0	1963.88	0	0.478	-1.07	0.726763	12.1	0.242	0.649	0.478	-2.05	-0.62	-1.07	122	78	81.06	45.91	3	3	279.4	105.9	53	67.6	68.7	25.3	1	1	1	1	1	1	279.4	105.9	53	67.6	68.7
FALSE	High	[R].GADAAQAKVLTFLDSHCECNEHWLEPLLER.[V]	2xCarbamidomethyl [C17; C19]; 1xAcetyl:2H(3) [K8]; 1xAcetyl:2H(3) [N-Term]	Q10471 2xCarbamidomethyl [C227; C229]; 1xAcetyl:2H(3) [K218]; 1xAcetyl:2H(3) [N-Term]	FALSE		0.00110491	0	1	1	1	Q10471	Q10471 [211-240]	0	3599.72	0	0.01	-6.64	1.64805e-16	0	0.01			-6.64			200				1		600						1						600
FALSE	High	[D].FETGDAGASATFPMQCSALR.[K]	1xCarbamidomethyl [C16]; 1xOxidation [M14]; 1xAcetyl:2H(3) [N-Term]	P63241 1xCarbamidomethyl [C22]; 1xOxidation [M20]; 1xAcetyl:2H(3) [N-Term]	FALSE		0.000140446	0	1	2	8	P63241	P63241 [7-26]	0	2177.97	0	3.615	1.85	0.583077	135.28	0.316	9.401	3.615	-1.66	3.23	1.85	43.3	156.7	138.12	30.26	3	3	252.6	14.7	24.9	79.9	138	89.9	1	1	1	1	1	1	252.6	14.7	24.9	79.9	138
FALSE	High	[K].EVTVLLEHQKKVSKTR.[H]	1xGlu->pyro-Glu [N-Term]; 3xAcetyl:2H(3) [K10; K11; K14]	Q14574 1xGlu->pyro-Glu [N-Term]; 3xAcetyl:2H(3) [K117; K118; K121]	FALSE		0.000373609	0	1	1	6	Q14574	Q14574 [108-123]	0	2012.18	0	0.328	-1.61	0.381724	2.72	0.328	0.272	0.675	-1.61	-1.88	-0.57	140.9	59.1	55.79	64.56	3	3	62	219.6	142.3	20.3	59.7	96.1	1	1	1	1	1	1	62	219.6	142.3	20.3	59.7
FALSE	High	[D].FETGDAGASATFPMQCSALR.[K]	1xCarbamidomethyl [C16]; 1xAcetyl:2H(3) [N-Term]	P63241 1xCarbamidomethyl [C22]; 1xAcetyl:2H(3) [N-Term]	FALSE		8.74884e-06	0	1	2	19	P63241	P63241 [7-26]	0	2161.97	0	2.118	1.08	0.405096	60.92	1.111	2.988	2.118	0.15	1.58	1.08	94.7	105.3	56.24	83.73	3	3	84.3	88	22.9	93.7	262.8	48.4	1	1	1	1	1	1	84.3	88	22.9	93.7	262.8
FALSE	High	[R].FEIGEGENLDLPYGLER.[A]			FALSE		5.42546e-06	0	1	1	12	Q02790	Q02790 [190-206]	0	1950.94	0	2.121	1.08	0.344352	27.8	0.714	2.519	2.121	-0.49	1.33	1.08	65.6	134.4	68.71	5.13	3	3	152.1	46.1	56.7	108.7	116.1	120.3	1	1	1	1	1	1	152.1	46.1	56.7	108.7	116.1
FALSE	High	[T].EVVCAPPTAYIDFAR.[Q]	1xCarbamidomethyl [C4]; 1xGlu->pyro-Glu [N-Term]	P60174 1xCarbamidomethyl [C79]; 1xGlu->pyro-Glu [N-Term]	FALSE		0.000476227	0	1	1	21	P60174	P60174 [76-90]	0	1690.83	0	0.761	-0.39	0.972143	10.28	0.761	1.001	0.67	-0.39	0	-0.58	113.5	86.5	44.4	64.34	3	3	100.4	158.3	63.7	76.4	158.4	42.7	1	1	1	1	1	1	100.4	158.3	63.7	76.4	158.4
FALSE	High	[K].EVVDPTKCNLLAEKQYGFCKGSVIQKALGGEDVR.[V]	2xCarbamidomethyl [C8; C19]; 1xGlu->pyro-Glu [N-Term]; 4xAcetyl:2H(3) [K7; K14; K20; K26]	P12763 2xCarbamidomethyl [C219; C230]; 1xGlu->pyro-Glu [N-Term]; 4xAcetyl:2H(3) [K218; K225; K231; K237]	TRUE	FBS	4.93122e-05	0	1	1	18	P12763	P12763 [212-245]	0	3971.04	0	1.107	0.15	0.986557	46.74	2.384	1.107	0.758	1.25	0.15	-0.4	105.5	94.5	12.11	67.66	3	3	88.1	70.5	87.2	210.1	78	66.1	1	1	1	1	1	1	88.1	70.5	87.2	210.1	78
FALSE	High	[T].EVVKAKAGAGSATLSMAYAGAR.[F]	1xGlu->pyro-Glu [N-Term]; 2xAcetyl:2H(3) [K4; K6]	P40926 1xGlu->pyro-Glu [N-Term]; 2xAcetyl:2H(3) [K239; K241]	FALSE		5.80873e-06	0	1	1	2	P40926	P40926 [236-257]	0	2181.16	0	0.353	-1.5	0.494217	5.99		0.485	0.256		-1.04	-1.96	147.9	52.1	17.36	27.4	2	2		194	248.3		94.2	63.6		1	1		1	1		194	248.3		94.2
FALSE	High	[K].EVVQNFAKEFVISDR.[K]	1xGlu->pyro-Glu [N-Term]; 1xAcetyl:2H(3) [K8]	Q14019 1xGlu->pyro-Glu [N-Term]; 1xAcetyl:2H(3) [K110]	FALSE		0.0002931	0	1	1	18	Q14019	Q14019 [103-117]	0	1807.94	0	1.131	0.18	0.992688	14.46	3.262	1.02	1.131	1.71	0.03	0.18	84.9	115.1	49.88	18.39	3	3	37.9	91.3	119.2	123.7	93.2	134.8	1	1	1	1	1	1	37.9	91.3	119.2	123.7	93.2
FALSE	High	[S].EVVYGAKLQPLDFKGNAEQSR.[L]	1xGlu->pyro-Glu [N-Term]; 2xAcetyl:2H(3) [K7; K14]	F1MSZ6 1xGlu->pyro-Glu [N-Term]; 2xAcetyl:2H(3) [K202; K209]	TRUE	FBS	0.000145874	0	1	1	37	F1MSZ6	F1MSZ6 [196-216]	0	2421.27	0	0.472	-1.08	0.612327	0.66	0.472	0.815	0.463	-1.08	-0.29	-1.11	122.5	77.5	41.65	26.91	3	3	189.9	86.6	111.6	89.7	70.6	51.6	1	1	1	1	1	1	189.9	86.6	111.6	89.7	70.6
FALSE	High	[H].EVYAVDVLVSSGEGKAKDAGQR.[T]	1xGlu->pyro-Glu [N-Term]; 2xAcetyl:2H(3) [K15; K17]	Q9UQ80 1xGlu->pyro-Glu [N-Term]; 2xAcetyl:2H(3) [K236; K238]	FALSE		6.70911e-06	0	1	1	16	Q9UQ80	Q9UQ80 [222-243]	0	2350.22	0	0.797	-0.33	0.975159	21.53	0.615	1.158	0.797	-0.7	0.21	-0.33	99.3	100.7	14.73	29.94	3	3	99.4	98.4	126.4	61.1	114	100.8	1	1	1	1	1	1	99.4	98.4	126.4	61.1	114
FALSE	High	[K].EWEEAELQAKNLPKAER.[Q]	1xGlu->pyro-Glu [N-Term]; 2xAcetyl:2H(3) [K10; K14]	Q06481 1xGlu->pyro-Glu [N-Term]; 2xAcetyl:2H(3) [K420; K424]	FALSE		0.000370786	0	1	1	3	Q06481	Q06481 [411-427]	0	2113.08	0	0.081	-3.62	0.000588222	3.92	0.661	0.01		-0.6	-6.64		134.1	65.9	40.66		2	1	173	312.7		114.3			1	1		1			173	312.7		114.3
FALSE	High	[R].EWHHFLVVNMKGNDISSGTVLSDYVGSGPPKGTGLHR.[Y]	2xAcetyl:2H(3) [K11; K31]	P30086 2xAcetyl:2H(3) [K93; K113]	FALSE		0.000584436	0	1	1	4	P30086	P30086 [83-119]	0	4082.05	0	0.947	-0.08	0.977339	46.4	2.99	0.947	0.616	1.58	-0.08	-0.7	123.8	76.2	116.83	127.91	3	3	1.9	243.5	73.2	5.8	230.4	45.1	1	1	1	1	1	1	1.9	243.5	73.2	5.8	230.4
FALSE	High	[N].EWKTPGKKTIVKCAVNQR.[Q]	1xCarbamidomethyl [C13]; 1xGlu->pyro-Glu [N-Term]; 4xAcetyl:2H(3) [K3; K7; K8; K12]	Q15393 1xCarbamidomethyl [C547]; 1xGlu->pyro-Glu [N-Term]; 4xAcetyl:2H(3) [K537; K541; K542; K546]	FALSE		0.000221382	0	1	1	5	Q15393	Q15393 [535-552]	0	2305.29	0	100	6.64	1.64805e-16	0	1.148	100	100	0.2	6.64	6.64	157.1	42.9		105.98	1	3	234.8			269.5	31.5	64.2	1			1	1	1	234.8			269.5	31.5
FALSE	High	[Q].EWLDELTETLLVVHMPR.[F]	1xGlu->pyro-Glu [N-Term]	F1MSZ6 1xGlu->pyro-Glu [N-Term]	TRUE	FBS	0.00011102	0	1	1	2	F1MSZ6	F1MSZ6 [339-355]	0	2063.06	0	0.01	-6.64	1.64805e-16	0	0.01	100	0.01	-6.64	6.64	-6.64	159.5	40.5	92.51		2	1	452.8		94.7		52.5		1		1		1		452.8		94.7		52.5
FALSE	High	[T].EWLDGKHVVFGKVKEGMNIVEAMER.[F]	1xGlu->pyro-Glu [N-Term]; 1xOxidation [M]; 3xAcetyl:2H(3) [K6; K12; K14]	P62937 1xGlu->pyro-Glu [N-Term]; 1xOxidation [M]; 3xAcetyl:2H(3) [K125; K131; K133]	FALSE		1.48772e-05	0	1	1	19	P62937	P62937 [120-144]	0	3034.55	0	8.882	3.15	0.0578703	102.29	100	2.754	8.882	6.64	1.46	3.15	33.7	166.3	74.19	81	2	3		86.2	26.9	10.5	237.5	238.9		1	1	1	1	1		86.2	26.9	10.5	237.5
FALSE	High	[Q].EYAQVIKMLGNGR.[L]	1xGlu->pyro-Glu [N-Term]; 1xAcetyl:2H(3) [K7]	P47813 1xGlu->pyro-Glu [N-Term]; 1xAcetyl:2H(3) [K40]	FALSE		0.00274301	0	1	2	9	P47813	P47813 [34-46]	0	1505.8	0	1.887	0.92	0.854814	49.77	1.887	3.562	1.254	0.92	1.83	0.33	83.4	116.6	44.58	23.88	3	3	88.1	33.5	85.4	166.4	119.4	107.1	1	1	1	1	1	1	88.1	33.5	85.4	166.4	119.4
FALSE	High	[Q].EYAQVIKMLGNGR.[L]	1xGlu->pyro-Glu [N-Term]; 1xOxidation [M8]; 1xAcetyl:2H(3) [K7]	P47813 1xGlu->pyro-Glu [N-Term]; 1xOxidation [M41]; 1xAcetyl:2H(3) [K40]	FALSE		0.0029365	0	1	2	4	P47813	P47813 [34-46]	0	1521.79	0	2.089	1.06	0.956803	94.77	0.209	3.425	2.089	-2.26	1.78	1.06	118.1	81.9	108.83	74.05	3	3	252.9	13.3	76.2	52.8	45.6	159.2	1	1	1	1	1	1	252.9	13.3	76.2	52.8	45.6
FALSE	High	[E].EYEFLTPVEEAPKGMLAR.[G]	1xGlu->pyro-Glu [N-Term]; 1xAcetyl:2H(3) [K13]	P52565 1xGlu->pyro-Glu [N-Term]; 1xAcetyl:2H(3) [K167]; P52566 1xGlu->pyro-Glu [N-Term]; 1xAcetyl:2H(3) [K164]	FALSE		0.000680144	0	2	2	14	P52565; P52566	P52565 [155-172]; P52566 [152-169]	0	2107.06	0	1.659	0.73	0.93455	30	1.659	3.203	1.323	0.73	1.68	0.4	59.7	140.3	21.14	40.97	3	3	82.6	58.2	58.4	137	186.5	77.2	1	1	1	1	1	1	82.6	58.2	58.4	137	186.5
FALSE	High	[A].EYGEIKNIHLNLDR.[R]	1xGlu->pyro-Glu [N-Term]; 1xAcetyl:2H(3) [K6]	Q9Y5S9 1xGlu->pyro-Glu [N-Term]; 1xAcetyl:2H(3) [K100]	FALSE		0.00354852	0	1	1	13	Q9Y5S9	Q9Y5S9 [95-108]	0	1740.91	0	1.272	0.35	0.997389	71.38	1.272	2.22	0.659	0.35	1.15	-0.6	88	112	25.84	32.91	3	3	88.3	66.2	112.2	112.3	147.1	74	1	1	1	1	1	1	88.3	66.2	112.2	112.3	147.1
FALSE	High	[H].EYLPILGLAEFR.[S]	1xGlu->pyro-Glu [N-Term]	P17174 1xGlu->pyro-Glu [N-Term]	FALSE		0.00274301	0	1	1	16	P17174	P17174 [70-81]	0	1402.77	0	0.606	-0.72	0.884531	3.86	0.563	0.891	0.606	-0.83	-0.17	-0.72	124.6	75.4	5.24	30.94	3	3	111.7	124	119	62.8	110.5	72	1	1	1	1	1	1	111.7	124	119	62.8	110.5
FALSE	High	[G].EYNKASNDMYHSR.[A]	1xGlu->pyro-Glu [N-Term]; 1xAcetyl:2H(3) [K4]	P01034 1xGlu->pyro-Glu [N-Term]; 1xAcetyl:2H(3) [K62]	FALSE		0.00300398	0	1	1	19	P01034	P01034 [59-71]	0	1641.72	0	0.818	-0.29	0.967382	7.21	0.818	0.493	0.877	-0.29	-1.02	-0.19	129	71	36.95	31.78	3	3	135.2	150.9	68.6	110.6	74.4	60.2	1	1	1	1	1	1	135.2	150.9	68.6	110.6	74.4
FALSE	High	[A].EYQHFIQQCTDDVR.[L]	1xCarbamidomethyl [C9]; 1xGlu->pyro-Glu [N-Term]	Q14019 1xCarbamidomethyl [C52]; 1xGlu->pyro-Glu [N-Term]	FALSE		0.000893599	0	1	1	2	Q14019	Q14019 [44-57]	0	1820.8	0	2.418	1.27	0.851006	2.78	2.373	3.184	2.418	1.25	1.67	1.27	47.8	152.2	83.99	74.37	3	3	109.4	38.8	20.1	259.7	123.4	48.6	1	1	1	1	1	1	109.4	38.8	20.1	259.7	123.4
FALSE	High	[N].FANDATFEIKKCDLHR.[L]	1xCarbamidomethyl [C12]; 2xAcetyl:2H(3) [K10; K11]; 1xAcetyl:2H(3) [N-Term]	P08559 1xCarbamidomethyl [C41]; 2xAcetyl:2H(3) [K39; K40]; 1xAcetyl:2H(3) [N-Term]	FALSE		0.0040975	0	1	1	5	P08559	P08559 [30-45]	0	2100.05	0	0.386	-1.37	0.546134	7.06	0.386	0.605	0.263	-1.37	-0.72	-1.93	158.4	41.6	56.78	81.33	3	3	48.2	188.7	182.4	18.6	114.2	47.9	1	1	1	1	1	1	48.2	188.7	182.4	18.6	114.2
FALSE	High	[R].FASENDLPEWKER.[G]	1xAcetyl:2H(3) [K11]	P43487 1xAcetyl:2H(3) [K68]	FALSE		0.00130542	0	1	1	13	P43487	P43487 [58-70]	0	1665.79	0	0.658	-0.6	0.908591	13.93	0.515	0.658	0.814	-0.96	-0.6	-0.3	129.8	70.2	22.43	14.68	3	3	135.9	139	90.2	70	91.4	73.5	1	1	1	1	1	1	135.9	139	90.2	70	91.4
FALSE	High	[R].FAVGTAGLGAEER.[R]			FALSE		0.00167635	0	1	1	7	Q96L58	Q96L58 [94-106]	0	1277.65	0	0.638	-0.65	0.84071	10.71	0.525	0.638	2.037	-0.93	-0.65	1.03	115.5	84.5	42.83	31.22	3	3	153.7	110.2	61	80.6	70.3	124.2	1	1	1	1	1	1	153.7	110.2	61	80.6	70.3
FALSE	High	[R].FCEVIPGLNDTAENLLR.[T]	1xCarbamidomethyl [C2]	Q9NPH2 1xCarbamidomethyl [C235]	FALSE		3.66854e-05	0	1	1	7	Q9NPH2	Q9NPH2 [234-250]	0	1960.98	0	1.59	0.67	0.927269	97.66	0.543	1.59	2.846	-0.88	0.67	1.51	77.2	122.8	55.19	34.09	3	3	143.3	66.2	53.9	77.8	105.3	153.4	1	1	1	1	1	1	143.3	66.2	53.9	77.8	105.3
FALSE	High	[R].FDCAPDKAITQEQCEAR.[G]	2xCarbamidomethyl [C3; C14]; 1xAcetyl:2H(3) [K7]	P10253 2xCarbamidomethyl [C92; C103]; 1xAcetyl:2H(3) [K96]	FALSE		3.83934e-05	0	1	1	4	P10253	P10253 [90-106]	0	2083.93	0	0.511	-0.97	0.727968	20.58	0.161	0.782	0.511	-2.64	-0.35	-0.97	132.4	67.6	49.33	34.48	3	3	225.7	95.7	110.9	36.3	74.8	56.6	1	1	1	1	1	1	225.7	95.7	110.9	36.3	74.8
FALSE	High	[K].FDEFFSAGCAPGSPR.[N]	1xCarbamidomethyl [C9]	G3X6N3 1xCarbamidomethyl [C507]; Q29443 1xCarbamidomethyl [C507]	TRUE	FBS	0.00142972	0	2	2	1	G3X6N3; Q29443	G3X6N3 [499-513]; Q29443 [499-513]	0	1644.71	0	0.231	-2.12	0.233193	7.55	0.01	0.231	0.862	-6.64	-2.12	-0.21	122.8	77.2	87.3	43.07	3	2	21.4	267.1	134.2		61.6	115.6	1	1	1		1	1	21.4	267.1	134.2		61.6
FALSE	High	[R].FDGGVEAIATR.[Q]			FALSE		0.00184989	0	1	1	8	P33908	P33908 [526-536]	0	1135.57	0	0.831	-0.27	0.986492	69.53	0.266	0.831	1.769	-1.91	-0.27	0.82	106.6	93.4	86.7	19.17	3	3	252.3	76.6	50.7	67.2	63.6	89.6	1	1	1	1	1	1	252.3	76.6	50.7	67.2	63.6
FALSE	High	[F].FDIAVDGEPLGR.[V]			FALSE		0.00179467	0	1	1	11	P62937	P62937 [8-19]	0	1288.65	0	1.636	0.71	0.91293	95.11	3.956	1.636	0.587	1.98	0.71	-0.77	123.9	76.1	70.37	65.7	3	3	16.5	120.5	126.3	65.4	197.2	74.1	1	1	1	1	1	1	16.5	120.5	126.3	65.4	197.2
FALSE	High	[R].FEDEELQQILDDIQTKR.[S]	1xAcetyl:2H(3) [K16]	O15514 1xAcetyl:2H(3) [K137]	FALSE		0.000428257	0	1	1	5	O15514	O15514 [122-138]	0	2165.08	0	3.458	1.79	0.784018	7.52	3.458	5.839	3.283	1.79	2.55	1.71	46.7	153.3	39.1	17.9	3	3	55.3	23.6	44.8	191.1	137.9	147.2	1	1	1	1	1	1	55.3	23.6	44.8	191.1	137.9
FALSE	High	[R].FEEEIKAEQEER.[K]	1xAcetyl:2H(3) [K6]	Q96C19 1xAcetyl:2H(3) [K212]	FALSE		0.000773715	0	1	1	5	Q96C19	Q96C19 [207-218]	0	1581.75	0	3.13	1.65	0.824666	86.5	1.304	100	3.13	0.38	6.64	1.65	95.2	104.8	110.23	82.22	2	3	191.5		23.7	249.7	60.7	74.3	1		1	1	1	1	191.5		23.7	249.7	60.7
FALSE	High	[S].FELFADKVPKTAENFR.[A]	2xAcetyl:2H(3) [K7; K10]	P62937 2xAcetyl:2H(3) [K28; K31]	FALSE		0.000275845	0	1	1	4	P62937	P62937 [22-37]	0	2002.06	0	0.508	-0.98	0.736844	37.56	0.01	1.172	0.508	-6.64	0.23	-0.98	96.9	103.1	92.17	13.48	3	2	8.7	117.3	223.2		137.4	113.5	1	1	1		1	1	8.7	117.3	223.2		137.4
FALSE	High	[D].FETGDAGASATFPMQCSALR.[K]	1xCarbamidomethyl [C16]	P63241 1xCarbamidomethyl [C22]	FALSE		0.000116188	0	1	2	9	P63241	P63241 [7-26]	0	2116.94	0	2.813	1.49	0.889124	25.62	2.327	2.813	100	1.22	1.49	6.64	87.5	112.5	75.36	100.6	2	3	35	114.9		81.5	323.1	45.6	1	1		1	1	1	35	114.9		81.5	323.1
FALSE	High	[-].MMGHRPVLVLSQNTKR.[E]	1xAcetyl [N-Term]; 1xAcetyl:2H(3) [K15]	P49368 1xAcetyl [N-Term]; 1xAcetyl:2H(3) [K15]	FALSE		0.000218049	0	1	1	7	P49368	P49368 [1-16]	0	1954.06	0	4.845	2.28	0.0703186	79.58	7.445	4.845	1.288	2.9	2.28	0.37	34.2	165.8	39.98	49.9	3	3	31.8	32.7	61.3	236.7	158.5	78.9	1	1	1	1	1	1	31.8	32.7	61.3	236.7	158.5
FALSE	High	[-].MNAGSDPVVIVSAAR.[T]	1xAcetyl [N-Term]	Q9BWD1 1xAcetyl [N-Term]	FALSE		0.000131179	0	1	1	17	Q9BWD1	Q9BWD1 [1-15]	0	1528.78	0	0.982	-0.03	0.995695	13.85	0.982	3.013	0.887	-0.03	1.59	-0.17	58.7	141.3	63.57	46.22	3	3	147.7	48.2	60.2	145.1	145.3	53.4	1	1	1	1	1	1	147.7	48.2	60.2	145.1	145.3
FALSE	High	[-].MNKHQKPVLTGQR.[F]	1xAcetyl [N-Term]; 2xAcetyl:2H(3) [K3; K6]	Q9Y6E2 1xAcetyl [N-Term]; 2xAcetyl:2H(3) [K3; K6]	FALSE		0.000271692	0	1	1	6	Q9Y6E2	Q9Y6E2 [1-13]	0	1668.91	0	3.654	1.87	0.568099	57.28	0.624	5.066	3.654	-0.68	2.34	1.87	38.7	161.3	119.82	30.47	3	3	197.3	29.5	21.6	123	149.6	78.9	1	1	1	1	1	1	197.3	29.5	21.6	123	149.6
FALSE	High	[D].TEVVCAPPTAYIDFAR.[Q]	1xCarbamidomethyl [C5]	P60174 1xCarbamidomethyl [C79]	FALSE		0.0009004	0	1	1	11	P60174	P60174 [75-90]	0	1809.88	0	2.236	1.16	0.947304	21.66	1.909	2.236	100	0.93	1.16	6.64	111.1	88.9	99.14	130.21	2	3	27.3	155.4		52.1	347.3	17.9	1	1		1	1	1	27.3	155.4		52.1	347.3
FALSE	High	[K].TEWLDGKHVVFGKVKEGMNIVEAMER.[F]	3xAcetyl:2H(3) [K7; K13; K15]	P62937 3xAcetyl:2H(3) [K125; K131; K133]	FALSE		1.09504e-06	0	1	1	3	P62937	P62937 [119-144]	0	3137.61	0	100	6.64	1.64805e-16	0	100	0.254	100	6.64	-1.98	6.64	159.5	40.5		14.08	1	3		340.3		74.5	86.4	98.8		1		1	1	1		340.3		74.5	86.4
FALSE	High	[R].TEYEVKDQAAKGDEVTR.[K]	2xAcetyl:2H(3) [K6; K11]	Q9H074 2xAcetyl:2H(3) [K253; K258]	FALSE		0.000521598	0	1	1	1	Q9H074	Q9H074 [248-264]	0	2029	0	0.983	-0.02	0.947181	47.48	0.983	3.168	0.658	-0.02	1.66	-0.6	86.7	113.3	88.87	68.51	3	3	188.5	27.6	67	185.4	87.5	44.1	1	1	1	1	1	1	188.5	27.6	67	185.4	87.5
FALSE	High	[R].TFEDISEKGSLDQDR.[R]	1xAcetyl:2H(3) [K8]	P48637 1xAcetyl:2H(3) [K245]	FALSE		6.93712e-05	0	1	1	17	P48637	P48637 [238-252]	0	1784.84	0	1.11	0.15	0.998323	74.05	0.555	1.11	1.691	-0.85	0.15	0.76	94.8	105.2	37.49	76.89	3	3	52.8	94.3	118.5	29.3	104.7	200.3	1	1	1	1	1	1	52.8	94.3	118.5	29.3	104.7
FALSE	High	[R].TFEGIDPKKTTMR.[D]	2xAcetyl:2H(3) [K8; K9]	P50395 2xAcetyl:2H(3) [K164; K165]	FALSE		0.000834659	0	1	1	29	P50395	P50395 [157-169]	0	1613.85	0	1.461	0.55	0.835714	80.65	0.664	1.461	2.256	-0.59	0.55	1.17	84	116	39.72	34.37	3	3	127.7	65.6	69.4	84.8	95.9	156.6	1	1	1	1	1	1	127.7	65.6	69.4	84.8	95.9
FALSE	High	[R].TFEGIDPKKTTMR.[D]	1xOxidation [M12]; 2xAcetyl:2H(3) [K8; K9]	P50395 1xOxidation [M168]; 2xAcetyl:2H(3) [K164; K165]	FALSE		0.0029365	0	1	1	10	P50395	P50395 [157-169]	0	1629.84	0	0.801	-0.32	0.972143	35.61	0.502	0.801	1.89	-1	-0.32	0.92	125.6	74.4	42.59	86.45	3	3	129	50.3	109.3	64.7	40.3	206.5	1	1	1	1	1	1	129	50.3	109.3	64.7	40.3
FALSE	High	[R].TFIAIKPDGVQR.[G]	1xAcetyl:2H(3) [K6]	P15531 1xAcetyl:2H(3) [K12]; P22392 1xAcetyl:2H(3) [K12]	FALSE		0.000921113	0	2	2	120	P15531; P22392	P15531 [7-18]; P22392 [7-18]	0	1389.79	0	1.011	0.02	0.982416	21.32	1.011	1.157	0.847	0.02	0.21	-0.24	92.7	107.3	30.13	16.31	3	3	82.3	84.8	136.2	83.2	98.1	115.4	1	1	1	1	1	1	82.3	84.8	136.2	83.2	98.1
FALSE	High	[R].TFIAIKPDGVQR.[G]	1xAcetyl [N-Term]; 1xAcetyl:2H(3) [K6]	P15531 1xAcetyl [N-Term]; 1xAcetyl:2H(3) [K12]; P22392 1xAcetyl [N-Term]; 1xAcetyl:2H(3) [K12]	FALSE		0.00344266	0	2	2	93	P15531; P22392	P15531 [7-18]; P22392 [7-18]	0	1431.8	0	0.832	-0.26	0.991502	12.18	0.832	1.671	0.734	-0.26	0.74	-0.45	74.9	125.1	109.37	81.07	3	3	21.5	57.3	235.2	17.9	95.7	172.5	1	1	1	1	1	1	21.5	57.3	235.2	17.9	95.7
FALSE	High	[R].TFIAIKPDGVQR.[G]	1xAcetyl:2H(3) [K6]; 1xAcetyl:2H(3) [N-Term]	P15531 1xAcetyl:2H(3) [K12]; 1xAcetyl:2H(3) [N-Term]; P22392 1xAcetyl:2H(3) [K12]; 1xAcetyl:2H(3) [N-Term]	FALSE		0.00278488	0	2	2	114	P15531; P22392	P15531 [7-18]; P22392 [7-18]	0	1434.82	0	0.985	-0.02	0.988196	8.82	0.985	1.557	0.924	-0.02	0.64	-0.11	96.8	103.2	20.03	9.74	3	3	97.3	74.6	112.3	95.8	116.2	103.8	1	1	1	1	1	1	97.3	74.6	112.3	95.8	116.2
FALSE	High	[A].TFPEEAIADLSVNMYNR.[L]	1xAcetyl:2H(3) [N-Term]	Q99574 1xAcetyl:2H(3) [N-Term]	FALSE		8.64374e-05	0	1	1	21	Q99574	Q99574 [20-36]	0	2014.96	0	0.382	-1.39	0.338099	14.36	0.128	0.757	0.382	-2.96	-0.4	-1.39	113.9	86.1	117.73	48.27	3	3	383.6	61	43.4	49.2	46.2	16.6	1	1	1	1	1	1	383.6	61	43.4	49.2	46.2
FALSE	High	[K].TFVNITPAEVGVLVGKDR.[S]	1xAcetyl:2H(3) [K16]	P07737 1xAcetyl:2H(3) [K54]	FALSE		0.00018736	0	1	1	13	P07737	P07737 [39-56]	0	1960.09	0	1.463	0.55	0.963074	64.39	3.783	1.463	0.828	1.92	0.55	-0.27	81.2	118.8	139.05	112.21	3	3	4.1	37.6	266.9	15.5	55.1	220.9	1	1	1	1	1	1	4.1	37.6	266.9	15.5	55.1
FALSE	High	[K].TFVNITPAEVGVLVGKDR.[S]	1xAcetyl [N-Term]; 1xAcetyl:2H(3) [K16]	P07737 1xAcetyl [N-Term]; 1xAcetyl:2H(3) [K54]	FALSE		8.77585e-05	0	1	1	10	P07737	P07737 [39-56]	0	2002.1	0	1.011	0.02	0.986001	53.69		1.442	0.709		0.53	-0.5	99.4	100.6	131.35	121.68	2	2		12.3	333.4		17.7	236.5		1	1		1	1		12.3	333.4		17.7
FALSE	High	[K].TFVNITPAEVGVLVGKDR.[S]	1xAcetyl:2H(3) [K16]; 1xAcetyl:2H(3) [N-Term]	P07737 1xAcetyl:2H(3) [K54]; 1xAcetyl:2H(3) [N-Term]	FALSE		0.000124396	0	1	1	5	P07737	P07737 [39-56]	0	2005.12	0	1.556	0.64	0.99056	48.79	100	1.556	1.044	6.64	0.64	0.06	121.9	78.1	100.35	105.73	2	3		39.4	231.7	25.7	61.3	241.9		1	1	1	1	1		39.4	231.7	25.7	61.3
FALSE	High	[R].TEVIQLEDTLAQVR.[K]			FALSE		0.00065484	0	1	2	1	O75150	O75150 [443-456]	0	1614.87	0	1.667	0.74	0.972143	98.22	0.563	1.667	2.792	-0.83	0.74	1.48	95.2	104.8	62.26	65.3	3	3	141.8	38.8	72.5	79.8	64.7	202.4	1	1	1	1	1	1	141.8	38.8	72.5	79.8	64.7
FALSE	High	[R].TGEAIVDAALSALR.[Q]			FALSE		0.00147372	0	1	1	7	Q15084	Q15084 [119-132]	0	1386.76	0	1.452	0.54	0.93455	31.07	0.896	1.452	1.757	-0.16	0.54	0.81	81.6	118.4	60.47	23.16	3	3	154.2	65.2	53.6	138.2	94.7	94.2	1	1	1	1	1	1	154.2	65.2	53.6	138.2	94.7
FALSE	High	[R].TGGQVPDTNYIFMGDFVDR.[G]			FALSE		7.71424e-05	0	1	1	1	O00743	O00743 [67-85]	0	2131.98	0	0.613	-0.71	0.839999	32.03		0.355	1.06		-1.49	0.08	124	76	62.12	10.69	2	2		278.1	108.4		98.7	114.8		1	1		1	1		278.1	108.4		98.7
FALSE	High	[G].TGGVDTAAVGGVFDVSNADR.[L]			FALSE		1.01819e-05	0	1	1	5	P12277	P12277 [322-341]	0	1907.91	0	0.553	-0.85	0.81459	6.59		0.64	0.479		-0.64	-1.06	128.7	71.3	60.86	76.44	2	2		269.2	107.2		172.2	51.4		1	1		1	1		269.2	107.2		172.2
FALSE	High	[R].TGKGQPSNKEDVDDLVSQLR.[Q]	2xAcetyl:2H(3) [K3; K9]	P12270 2xAcetyl:2H(3) [K925; K931]	FALSE		0.00016099	0	1	1	7	P12270	P12270 [923-942]	0	2276.16	0	2.64	1.4	0.698447	102.89	0.808	2.64	11.544	-0.31	1.4	3.53	42.5	157.5	106.76	49.51	3	3	142.2	31	18.3	114.9	81.9	211.6	1	1	1	1	1	1	142.2	31	18.3	114.9	81.9
FALSE	High	[R].TGKPIAVKLVKIKQEILPEER.[M]	4xAcetyl:2H(3) [K3; K8; K11; K13]	O75534 4xAcetyl:2H(3) [K81; K86; K89; K91]	FALSE		0.00262115	0	1	1	4	O75534	O75534 [79-99]	0	2569.57	0	1.941	0.96	0.892918	94.92	0.126	3.183	1.941	-2.98	1.67	0.96	81.9	118.1	39.76	79.66	3	3	104.9	45.1	99.6	13.3	143.7	193.4	1	1	1	1	1	1	104.9	45.1	99.6	13.3	143.7
FALSE	High	[L].TGSSAQEEASGVALGEAPDHSYESLR.[V]	1xAcetyl:2H(3) [N-Term]	Q13011 1xAcetyl:2H(3) [N-Term]	FALSE		0.000146985	0	1	1	6	Q13011	Q13011 [34-59]	0	2693.24	0	0.524	-0.93	0.857861	3.75	0.524	0.828	0.476	-0.93	-0.27	-1.07	135.5	64.5	36.44	68.15	3	3	84.6	170.1	108.4	44.3	140.9	51.6	1	1	1	1	1	1	84.6	170.1	108.4	44.3	140.9
FALSE	High	[R].TGVAPDVFAENMKLR.[E]	1xAcetyl:2H(3) [K13]	Q01581 1xAcetyl:2H(3) [K428]	FALSE		0.00193593	0	1	1	10	Q01581	Q01581 [416-430]	0	1692.88	0	1.901	0.93	0.768903	20.1	1.901	1.643	2.632	0.93	0.72	1.4	62.6	137.4	22.57	20	3	3	82.6	63.6	53	157	104.5	139.5	1	1	1	1	1	1	82.6	63.6	53	157	104.5
FALSE	High	[R].THAAGTPSEPSATVTIEELD.[P]			TRUE	FBS	0.0020569	0	1	1	1	Q2KJF1	Q2KJF1 [189-208]	0	2025.96	0	0.067	-3.9	0.0022593	2.19		0.451	0.01		-1.15	-6.64	88	112	109.86		2	1		380.7	47.8		171.5			1	1		1			380.7	47.8		171.5
FALSE	High	[R].THAAGTPSEPSATVTIEELDPPPAPTLTVDR.[E]			TRUE	FBS	9.68522e-05	0	1	1	20	Q2KJF1	Q2KJF1 [189-219]	0	3170.59	0	0.753	-0.41	0.96318	4.85	3.251	0.753	0.71	1.7	-0.41	-0.49	107.9	92.1	43.08	37.85	3	3	47.3	122.3	108	153.6	92.2	76.7	1	1	1	1	1	1	47.3	122.3	108	153.6	92.2
FALSE	High	[R].THMQDLKDVTNNVHYENYR.[S]	1xAcetyl:2H(3) [K7]	Q16181 1xAcetyl:2H(3) [K298]	FALSE		0.000112716	0	1	1	1	Q16181	Q16181 [292-310]	0	2422.13	0	1	0	0.975159	7412.26		100	0.01		6.64	-6.64	23.2	176.8			1	1			69.5		530.5				1		1				69.5		530.5
FALSE	High	[R].THNDIIHNENMR.[Q]			FALSE		0.00165114	0	1	1	21	P15311	P15311 [548-559]	0	1493.69	0	2.162	1.11	0.357815	46.74	0.825	2.843	2.162	-0.28	1.51	1.11	63.3	136.7	45.94	20.12	3	3	115.5	49.4	63	95.3	140.5	136.2	1	1	1	1	1	1	115.5	49.4	63	95.3	140.5
FALSE	High	[R].THNLEPYFESFINNLR.[R]			FALSE		0.000756314	0	1	1	11	P04264	P04264 [224-239]	0	1993.98	0	1.051	0.07	0.987065	56.63	4.944	0.649	1.051	2.31	-0.62	0.07	56.2	143.8	58.18	76.15	3	3	46	49.2	119.7	227.4	31.9	125.8	1	1	1	1	1	1	46	49.2	119.7	227.4	31.9
FALSE	High	[M].THSLVCPETVSR.[V]	1xAcetyl [N-Term]; 1xCarbamidomethyl [C6]	Q86WQ0 1xAcetyl [N-Term]; 1xCarbamidomethyl [C7]	FALSE		0.00149623	0	1	1	21	Q86WQ0	Q86WQ0 [2-13]	0	1427.69	0	1.04	0.06	0.99284	35.32	1.04	0.792	2.268	0.06	-0.34	1.18	98	102	70.88	36.81	3	3	104.9	167.2	26.4	109.1	132.5	60	1	1	1	1	1	1	104.9	167.2	26.4	109.1	132.5
FALSE	High	[R].THTQDAVPLTLGQEFSGYVQQVKYAMTR.[I]	1xAcetyl:2H(3) [K23]	P07954 1xAcetyl:2H(3) [K256]	FALSE		3.86857e-05	0	1	1	3	P07954	P07954 [234-261]	0	3213.61	0	7.116	2.83	0.305424	121.63	1.278	7.116	100	0.35	2.83	6.64	76	124	33.91	103.65	2	3	78.5	48.1		100.3	342.4	30.8	1	1		1	1	1	78.5	48.1		100.3	342.4
FALSE	High	[R].TGEAIVDAALSALR.[Q]	1xAcetyl:2H(3) [N-Term]	Q15084 1xAcetyl:2H(3) [N-Term]	FALSE		0.00230444	0	1	1	4	Q15084	Q15084 [119-132]	0	1431.79	0	0.926	-0.11	0.967382	44.93	0.926	2.644	0.599	-0.11	1.4	-0.74	99.5	100.5	98.71	84.84	3	3	212.1	24.5	64	196.4	64.7	38.3	1	1	1	1	1	1	212.1	24.5	64	196.4	64.7
FALSE	High	[R].TEVIDNTLNPDFVR.[K]			FALSE		0.000545879	0	1	3	8	Q9HCH3	Q9HCH3 [65-78]	0	1632.82	0	2.91	1.54	0.314208	64.2	1.65	2.91	4.231	0.72	1.54	2.08	38.2	161.8	61.74	22.38	3	3	98.5	36.3	37.7	162.4	105.7	159.4	1	1	1	1	1	1	98.5	36.3	37.7	162.4	105.7
FALSE	High	[R].TEPEAKKSKTAAKKNDKEAAGEGPALYED.[P]	6xAcetyl:2H(3) [K6; K7; K9; K13; K14; K17]	P27695 6xAcetyl:2H(3) [K24; K25; K27; K31; K32; K35]	FALSE		0.00120099	0	1	1	5	P27695	P27695 [19-47]	0	3346.72	0	1.218	0.28	0.999983	46.2		0.896	1.655		-0.16	0.73	90.2	109.8	125.61	113.53	2	2		292.2	17.3		261.8	28.6		1	1		1	1		292.2	17.3		261.8
FALSE	High	[R].TENAQKAGHFDKEIVPVLVSTR.[K]	2xAcetyl:2H(3) [K6; K12]	Q9BWD1 2xAcetyl:2H(3) [K194; K200]	FALSE		0.00216893	0	1	1	9	Q9BWD1	Q9BWD1 [189-210]	0	2529.36	0	0.892	-0.17	0.98859	5.74	0.892	2.358	0.848	-0.17	1.24	-0.24	59.6	140.4	80.61	58.81	3	3	176.8	55.5	42.9	157.6	130.8	36.4	1	1	1	1	1	1	176.8	55.5	42.9	157.6	130.8
FALSE	High	[R].TATESFASDPILYRPVAVALDTKGPEIR.[T]	1xAcetyl:2H(3) [K23]	P14618 1xAcetyl:2H(3) [K115]	FALSE		2.20701e-05	0	1	1	19	P14618	P14618 [93-120]	0	3062.62	0	2.926	1.55	0.0878522	40.98	0.981	2.926	3.735	-0.03	1.55	1.9	45	155	85.92	12.02	3	3	144.1	38	35	141.3	111	130.6	1	1	1	1	1	1	144.1	38	35	141.3	111
FALSE	High	[R].TATESFASDPILYRPVAVALDTKGPEIR.[T]	1xAcetyl:2H(3) [K23]; 1xAcetyl:2H(3) [N-Term]	P14618 1xAcetyl:2H(3) [K115]; 1xAcetyl:2H(3) [N-Term]	FALSE		0.000316194	0	1	1	22	P14618	P14618 [93-120]	0	3107.65	0	4.331	2.11	0.00808003	107.25	1.198	9.567	4.331	0.26	3.26	2.11	38.5	161.5	105.83	23.59	3	3	130.9	10.7	37.4	156.9	102.2	161.9	1	1	1	1	1	1	130.9	10.7	37.4	156.9	102.2
FALSE	High	[K].TATPQQAQEVHEKLR.[G]	1xAcetyl:2H(3) [K13]	P60174 1xAcetyl:2H(3) [K225]	FALSE		0.00111332	0	1	1	11	P60174	P60174 [213-227]	0	1780.94	0	1.103	0.14	0.998323	88.36	2.025	0.446	1.103	1.02	-1.17	0.14	138.3	61.7	82.54	99.64	3	3	17.8	103.8	188.3	36	46.3	207.8	1	1	1	1	1	1	17.8	103.8	188.3	36	46.3
FALSE	High	[R].TCPKPDELPFSTVVPLKR.[T]	1xCarbamidomethyl [C2]; 2xAcetyl:2H(3) [K4; K17]	P17690 1xCarbamidomethyl [C23]; 2xAcetyl:2H(3) [K25; K38]	TRUE	FBS	0.000834659	0	1	1	19	P17690	P17690 [22-39]	0	2174.18	0	1.162	0.22	0.948655	20.21	1.162	1.395	1.003	0.22	0.48	0	99.8	100.2	24.91	19.86	3	3	113.9	68.1	95.2	132.3	95	95.5	1	1	1	1	1	1	113.9	68.1	95.2	132.3	95
FALSE	High	[R].TDDYLDQPCLETVNR.[I]	1xCarbamidomethyl [C9]	P31150 1xCarbamidomethyl [C202]	FALSE		0.000121598	0	1	1	12	P31150	P31150 [194-208]	0	1838.82	0	0.361	-1.47	0.408314	13.91	0.795	0.361	0.101	-0.33	-1.47	-3.31	147	53	64.12	120.45	3	3	215.4	113.3	53.8	171.3	40.9	5.4	1	1	1	1	1	1	215.4	113.3	53.8	171.3	40.9
FALSE	High	[R].TDDYLDQPCLETVNR.[I]	1xCarbamidomethyl [C9]; 1xAcetyl:2H(3) [N-Term]	P31150 1xCarbamidomethyl [C202]; 1xAcetyl:2H(3) [N-Term]	FALSE		0.000277945	0	1	1	18	P31150	P31150 [194-208]	0	1883.85	0	1.621	0.7	0.81459	30.66	0.792	1.621	1.956	-0.34	0.7	0.97	71.9	128.1	64.13	29.03	3	3	154.8	45.6	68.7	122.5	74	134.4	1	1	1	1	1	1	154.8	45.6	68.7	122.5	74
FALSE	High	[R].TDDYLDQPCYETINR.[I]	1xCarbamidomethyl [C9]	P50395 1xCarbamidomethyl [C202]	FALSE		0.00175433	0	1	1	26	P50395	P50395 [194-208]	0	1902.82	0	1.707	0.77	0.612623	9.33	0.615	1.814	1.707	-0.7	0.86	0.77	77.3	122.7	8.33	44.37	3	3	92.7	84.5	78.5	57	153.3	134	1	1	1	1	1	1	92.7	84.5	78.5	57	153.3
FALSE	High	[R].TDDYLDQPCYETINR.[I]	1xCarbamidomethyl [C9]; 1xAcetyl:2H(3) [N-Term]	P50395 1xCarbamidomethyl [C202]; 1xAcetyl:2H(3) [N-Term]	FALSE		0.000880152	0	1	1	20	P50395	P50395 [194-208]	0	1947.85	0	1.09	0.12	0.967537	45.85	0.753	1.448	1.09	-0.41	0.53	0.12	95.7	104.3	48.94	18.42	3	3	152.8	54.7	94.8	115.1	79.2	103.4	1	1	1	1	1	1	152.8	54.7	94.8	115.1	79.2
FALSE	High	[R].TDEDVPSGPPR.[K]			FALSE		0.00400549	0	1	1	6	P10586	P10586 [703-713]	0	1169.54	0	1.442	0.53	0.882342	40.78	1.046	1.442	2.531	0.06	0.53	1.34	91.6	108.4	25.99	54.75	3	3	90.9	53.2	80.4	95.1	76.8	203.5	1	1	1	1	1	1	90.9	53.2	80.4	95.1	76.8
FALSE	High	[M].TDLVAVWDVALSDGVHKIEFEHGTTSGKR.[V]	1xAcetyl [N-Term]; 2xAcetyl:2H(3) [K17; K28]	Q9NVQ4 1xAcetyl [N-Term]; 2xAcetyl:2H(3) [K18; K29]	FALSE		0.000120679	0	1	1	2	Q9NVQ4	Q9NVQ4 [2-30]	0	3299.68	0	7.165	2.84	0.133843	1029.33		0.513	100		-0.96	6.64	116.3	83.7		46.17	1	2		237.7			122	240.3		1			1	1		237.7			122
FALSE	High	[K].TDQVIQSLIALVNDPQPEHPLR.[A]			FALSE		0.00280605	0	1	2	6	P68036	P68036 [101-122]	0	2483.33	0	0.129	-2.96	0.0462436	15.66	0.01		1.653	-6.64		0.73	39.8	160.2	100.59		2	1	35.9		212.6			351.5	1		1			1	35.9		212.6
FALSE	High	[R].TDYNASVSVPDSSGPER.[I]			FALSE		0.000321027	0	1	1	23	P61978	P61978 [70-86]	0	1780.8	0	2.588	1.37	0.438587	81.55	0.915	2.588	4.012	-0.13	1.37	2	48.4	151.6	95.86	19.61	3	3	161.9	38.7	30.2	148.2	100.1	121	1	1	1	1	1	1	161.9	38.7	30.2	148.2	100.1
FALSE	High	[R].TDYNASVSVPDSSGPER.[I]	1xAcetyl:2H(3) [N-Term]	P61978 1xAcetyl:2H(3) [N-Term]	FALSE		0.00130542	0	1	1	5	P61978	P61978 [70-86]	0	1825.83	0	4.193	2.07	0.408337	10.44	0.687	4.193	4.488	-0.54	2.07	2.17	55.9	144.1	87.01	39.68	3	3	136.5	26.2	42.6	93.7	109.8	191.1	1	1	1	1	1	1	136.5	26.2	42.6	93.7	109.8
FALSE	High	[R].TEALYYTDDTAMAR.[A]			FALSE		0.000513747	0	1	1	4	Q9NX46	Q9NX46 [70-83]	0	1620.72	0	0.894	-0.16	0.963859	16.81		1.03	0.777		0.04	-0.36	105.6	94.4	39.5	57.11	2	2		198	111.5		203.9	86.6		1	1		1	1		198	111.5		203.9
FALSE	High	[R].TEAPSATGQASSLLGGR.[L]			FALSE		0.000131179	0	1	1	14	P39060	P39060 [1711-1727]	0	1602.81	0	1.134	0.18	0.999636	0.49	0.594	1.138	1.134	-0.75	0.19	0.18	93.5	106.5	76.51	35.59	3	3	209.6	67.2	57.3	124.5	76.5	65	1	1	1	1	1	1	209.6	67.2	57.3	124.5	76.5
FALSE	High	[R].TEATQGLVLWSGKATER.[A]	1xAcetyl:2H(3) [K13]	O00468 1xAcetyl:2H(3) [K1933]	FALSE		3.81033e-05	0	1	1	19	O00468	O00468 [1921-1937]	0	1892	0	0.483	-1.05	0.591508	17.55	0.982	0.483	0.237	-0.03	-1.05	-2.08	134.9	65.1	28.54	42.33	3	3	98.7	127.5	174.1	97	61.5	41.3	1	1	1	1	1	1	98.7	127.5	174.1	97	61.5
FALSE	High	[R].TEAWVLETAGR.[L]			FALSE		0.00124738	0	1	1	1	Q96FV2	Q96FV2 [167-177]	0	1232.63	0	0.76	-0.4	0.930712	21.74	0.953	0.76	0.405	-0.07	-0.4	-1.3	113.7	86.3	55.89	12.04	3	3	68.2	103.5	202.7	64.9	78.6	82.1	1	1	1	1	1	1	68.2	103.5	202.7	64.9	78.6
FALSE	High	[R].TECAEPPRDEPPADGALKR.[A]	1xCarbamidomethyl [C3]; 1xAcetyl:2H(3) [K18]	P53041 1xCarbamidomethyl [C11]; 1xAcetyl:2H(3) [K26]	FALSE		0.0020569	0	1	1	38	P53041	P53041 [9-27]	1	2154.03	0	1.412	0.5	0.908591	34.87	0.617	1.744	1.412	-0.7	0.8	0.5	84.2	115.8	37.31	22.61	3	3	134.9	75	73	83.2	130.8	103.1	1	1	1	1	1	1	134.9	75	73	83.2	130.8
FALSE	High	[R].TECYGYALGDATR.[A]	1xCarbamidomethyl [C3]	P53041 1xCarbamidomethyl [C77]	FALSE		0.000616296	0	1	1	7	P53041	P53041 [75-87]	0	1476.64	0	1.597	0.68	0.92452	59.99	0.627	1.597	2.244	-0.67	0.68	1.17	70.7	129.3	71.02	22.2	3	3	169.8	52	58.2	106.4	83.1	130.5	1	1	1	1	1	1	169.8	52	58.2	106.4	83.1
FALSE	High	[R].TEEEEEDLPDAQTAAKR.[A]	1xAcetyl:2H(3) [K16]	O43665 1xAcetyl:2H(3) [K165]	FALSE		6.93712e-05	0	1	1	7	O43665	O43665 [150-166]	0	1976.91	0	9.073	3.18	0.138997	810.32	0.823	100		-0.28	6.64		141.4	58.6		84.27	1	2	295.3			243.1	61.6		1			1	1		295.3			243.1	61.6
FALSE	High	[R].TEFSFTDYSTKENVLAVIR.[N]	1xAcetyl:2H(3) [K11]	O43405 1xAcetyl:2H(3) [K427]	FALSE		0.00129556	0	1	1	1	O43405	O43405 [417-435]	0	2265.15	0	0.082	-3.6	0.00839084	4.09	0.01		0.68	-6.64		-0.56	173.1	26.9	127.4		2	1	551.7		28.8			19.6	1		1			1	551.7		28.8
FALSE	High	[K].TEGAEKKQQMAR.[E]	2xAcetyl:2H(3) [K6; K7]	P63104 2xAcetyl:2H(3) [K74; K75]	FALSE		0.00232197	0	1	1	19	P63104	P63104 [69-80]	0	1466.75	0	1.391	0.48	0.939152	59.2	1.946	0.469	1.391	0.96	-1.09	0.48	105.4	94.6	40.19	47.02	3	3	51.6	122.8	111.9	100.4	57.6	155.6	1	1	1	1	1	1	51.6	122.8	111.9	100.4	57.6
FALSE	High	[R].TEGLSVLSQAMAVIKEKIEEKR.[G]	3xAcetyl:2H(3) [K15; K17; K21]	P05198 3xAcetyl:2H(3) [K259; K261; K265]	FALSE		0.000282193	0	1	1	1	P05198	P05198 [245-266]	0	2594.44	0
FALSE	High	[R].TEGNIDDSLIGGNASAEGPEG.[E]			FALSE		0.000121598	0	1	1	5	P13693	P13693 [39-59]	0	2002.88	0	2.797	1.48	0.7949	23.88	2.797	3.248	1.497	1.48	1.7	0.58	47.1	152.9	51.06	11.28	3	3	42.9	44.8	98.8	119.9	145.6	147.9	1	1	1	1	1	1	42.9	44.8	98.8	119.9	145.6
FALSE	High	[R].TEGNIDDSLIGGNASAEGPEGEGT.[E]			FALSE		1.58079e-05	0	1	1	10	P13693	P13693 [39-62]	0	2290	0	1.7	0.77	0.969896	22.43	2.972	1.443	1.7	1.57	0.53	0.77	75.6	124.4	43.71	14.6	3	3	36	95	83.3	107	137.1	141.6	1	1	1	1	1	1	36	95	83.3	107	137.1
FALSE	High	[R].TEKPKMKQEEQLQR.[Q]	3xAcetyl:2H(3) [K3; K5; K7]	O94766 3xAcetyl:2H(3) [K313; K315; K317]	FALSE		0.000828354	0	1	1	17	O94766	O94766 [311-324]	0	1908.02	0	1.208	0.27	0.992688	72.78	0.611	1.208	1.801	-0.71	0.27	0.85	88	112	105.51	54.44	3	3	242	50.2	35.4	147.8	60.7	63.8	1	1	1	1	1	1	242	50.2	35.4	147.8	60.7
FALSE	High	[R].TEKPKMKQEEQLQR.[Q]	1xOxidation [M6]; 3xAcetyl:2H(3) [K3; K5; K7]	O94766 1xOxidation [M316]; 3xAcetyl:2H(3) [K313; K315; K317]	FALSE		0.0013456	0	1	1	9	O94766	O94766 [311-324]	0	1924.02	0	0.833	-0.26	0.954878	62.45	0.328	0.833	1.651	-1.61	-0.26	0.72	91.6	108.4	90.76	47.52	3	3	248.6	47.5	68.9	81.5	39.6	113.8	1	1	1	1	1	1	248.6	47.5	68.9	81.5	39.6
FALSE	High	[R].TEKPKMKQEEQLQR.[Q]	3xAcetyl:2H(3) [K3; K5; K7]; 1xAcetyl:2H(3) [N-Term]	O94766 3xAcetyl:2H(3) [K313; K315; K317]; 1xAcetyl:2H(3) [N-Term]	FALSE		0.00374166	0	1	1	1	O94766	O94766 [311-324]	0	1953.05	0	0.01	-6.64	1.64805e-16	0	0.01			-6.64			200				1		600						1						600
FALSE	High	[M].TELQSALLLR.[R]	1xAcetyl [N-Term]	P62253 1xAcetyl [N-Term]	FALSE		0.0031916	0	1	1	10	P62253	P62253 [2-11]	0	1185.68	0	1.314	0.39	0.952053	12.32	1.314	1.599	1.205	0.39	0.68	0.27	90.7	109.3	20.84	10.9	3	3	97.7	64.9	93.1	128.4	103.8	112.2	1	1	1	1	1	1	97.7	64.9	93.1	128.4	103.8
FALSE	High	[R].THVKGAELVEGCDGILGDNFRPTQPLSDR.[V]	1xCarbamidomethyl [C12]; 1xAcetyl:2H(3) [K4]	P35219 1xCarbamidomethyl [C266]; 1xAcetyl:2H(3) [K258]	FALSE		1.00286e-05	0	1	1	22	P35219	P35219 [255-283]	0	3226.6	0	0.579	-0.79	0.791941	32.87	0.579	1.784	0.197	-0.79	0.83	-2.35	126.6	73.4	20.4	79.08	3	3	121.4	88.9	134.4	70.3	158.6	26.4	1	1	1	1	1	1	121.4	88.9	134.4	70.3	158.6
FALSE	High	[G].TKALMDEVVKATSR.[G]	2xAcetyl:2H(3) [K2; K10]	P00558 2xAcetyl:2H(3) [K353; K361]	FALSE		0.00124738	0	1	1	1	P00558	P00558 [352-365]	0	1638.9	0	0.79	-0.34	0.935736	41.43		1.219	0.512		0.29	-0.97	111.7	88.3	54.25	96.87	2	2		207.4	92.4		252.9	47.3		1	1		1	1		207.4	92.4		252.9
FALSE	High	[A].TKDAGTIAGLNVLR.[I]	1xAcetyl:2H(3) [K2]	P11142 1xAcetyl:2H(3) [K159]	FALSE		0.00344266	0	1	1	2	P11142	P11142 [158-171]	0	1473.85	0	0.01	-6.64	1.64805e-16	0		0.01	0.01		-6.64	-6.64	200		63.08		2			433.8	166.2					1	1					433.8	166.2
FALSE	High	[R].TKDIEDVFYKYGAIR.[D]	2xAcetyl:2H(3) [K2; K10]	Q07955 2xAcetyl:2H(3) [K30; K38]	FALSE		5.48364e-05	0	1	1	1	Q07955	Q07955 [29-43]	0	1908	0	3.896	1.96	0.368907	1899.76		0.152	100		-2.72	6.64	168.2	31.8		30.74	1	2		432.3			65.6	102.1		1			1	1		432.3			65.6
FALSE	High	[R].TLVVHEKADDLGKGGNEESTKTGNAGSR.[L]	3xAcetyl:2H(3) [K7; K13; K21]	P00441 3xAcetyl:2H(3) [K123; K129; K137]	FALSE		8.09635e-09	0	1	1	131	P00441	P00441 [117-144]	0	3005.51	0	0.953	-0.07	0.99444	43.91	1.604	0.642	0.953	0.68	-0.64	-0.07	121.8	78.2	45.15	26.4	3	3	49.7	130	131.7	79.7	83.5	125.5	1	1	1	1	1	1	49.7	130	131.7	79.7	83.5
FALSE	High	[R].TLVVHEKADDLGKGGNEESTKTGNAGSR.[L]	1xAcetyl [N-Term]; 3xAcetyl:2H(3) [K7; K13; K21]	P00441 1xAcetyl [N-Term]; 3xAcetyl:2H(3) [K123; K129; K137]	FALSE		1.98467e-05	0	1	1	45	P00441	P00441 [117-144]	0	3047.52	0	0.609	-0.72	0.831413	0.46	0.604	0.609	1.012	-0.73	-0.72	0.02	124.3	75.7	119.32	136.84	3	3	6.1	62.3	243.5	3.7	37.9	246.5	1	1	1	1	1	1	6.1	62.3	243.5	3.7	37.9
FALSE	High	[R].TLVVHEKADDLGKGGNEESTKTGNAGSR.[L]	3xAcetyl:2H(3) [K7; K13; K21]; 1xAcetyl:2H(3) [N-Term]	P00441 3xAcetyl:2H(3) [K123; K129; K137]; 1xAcetyl:2H(3) [N-Term]	FALSE		1.01819e-05	0	1	1	83	P00441	P00441 [117-144]	0	3050.54	0	0.894	-0.16	0.999983	29.56	0.894	1.295	0.671	-0.16	0.37	-0.58	88.9	111.1	51.33	24.8	3	3	76.7	74	170.5	68.6	95.8	114.4	1	1	1	1	1	1	76.7	74	170.5	68.6	95.8
FALSE	High	[M].TMDKSELVQKAKLAEQAER.[Y]	1xAcetyl [N-Term]; 3xAcetyl:2H(3) [K4; K10; K12]	P31946 1xAcetyl [N-Term]; 3xAcetyl:2H(3) [K5; K11; K13]	FALSE		4.66185e-06	0	1	1	58	P31946	P31946 [2-20]	0	2352.24	0	0.938	-0.09	0.998323	12.97	1.049	0.938	0.844	0.07	-0.09	-0.24	99.1	100.9	8.04	15.46	3	3	102.4	111.2	94.7	107.4	104.3	80	1	1	1	1	1	1	102.4	111.2	94.7	107.4	104.3
FALSE	High	[M].TMDKSELVQKAKLAEQAER.[Y]	1xAcetyl [N-Term]; 1xOxidation [M2]; 3xAcetyl:2H(3) [K4; K10; K12]	P31946 1xAcetyl [N-Term]; 1xOxidation [M3]; 3xAcetyl:2H(3) [K5; K11; K13]	FALSE		7.2601e-05	0	1	1	27	P31946	P31946 [2-20]	0	2368.24	0	0.715	-0.48	0.940297	1.16	0.251	0.726	0.715	-1.99	-0.46	-0.48	153.4	46.6	44.09	66.53	3	3	154.9	64.7	171.7	38.9	47	122.8	1	1	1	1	1	1	154.9	64.7	171.7	38.9	47
FALSE	High	[R].TMKHTTDLDASKIR.[S]	2xAcetyl:2H(3) [K3; K12]; 1xAcetyl:2H(3) [N-Term]	P12532 2xAcetyl:2H(3) [K139; K148]; 1xAcetyl:2H(3) [N-Term]	FALSE		0.00130542	0	1	1	12	P12532	P12532 [137-150]	0	1751.93	0	1.038	0.05	0.982138	20.37	1.18	1.038	0.357	0.24	0.05	-1.49	141.8	58.2	51.76	59.08	3	3	47.2	138.2	158.7	55.7	143.5	56.7	1	1	1	1	1	1	47.2	138.2	158.7	55.7	143.5
FALSE	High	[R].TMPVEQVFAKNFR.[V]	1xOxidation [M2]; 1xAcetyl:2H(3) [K10]; 1xAcetyl:2H(3) [N-Term]	P10586 1xOxidation [M1008]; 1xAcetyl:2H(3) [K1016]; 1xAcetyl:2H(3) [N-Term]	FALSE		0.00161402	0	1	1	7	P10586	P10586 [1007-1019]	0	1672.86	0	2.093	1.07	0.927269	62.89	0.458	2.093	2.981	-1.13	1.07	1.58	74.8	125.2	106.63	66.06	3	3	213.4	18.2	58.4	97.8	38	174.2	1	1	1	1	1	1	213.4	18.2	58.4	97.8	38
FALSE	High	[R].TNEELVAFLSKNR.[D]	1xAcetyl:2H(3) [K11]	Q9H1B5 1xAcetyl:2H(3) [K347]	FALSE		0.00346882	0	1	1	2	Q9H1B5	Q9H1B5 [337-349]	0	1565.84	0	0.774	-0.37	0.930712	56.59	0.282	0.774	100	-1.83	-0.37	6.64	125.8	74.2	88.97	75.59	2	3	246.7	56.2		69.5	43.5	184.2	1	1		1	1	1	246.7	56.2		69.5	43.5
FALSE	High	[R].TNEKVELQELNDR.[F]	1xAcetyl:2H(3) [K4]	P08670 1xAcetyl:2H(3) [K104]	FALSE		0.000249945	0	1	2	27	P08670	P08670 [101-113]	0	1632.83	0	2.732	1.45	0.119853	55.72	1.535	2.732	3.759	0.62	1.45	1.91	49	151	45.92	19.48	3	3	90.4	41.9	45	138.8	114.5	169.3	1	1	1	1	1	1	90.4	41.9	45	138.8	114.5
FALSE	High	[R].TNLPIFKLKESCVR.[R]	1xCarbamidomethyl [C12]; 2xAcetyl:2H(3) [K7; K9]	Q9UMY4 1xCarbamidomethyl [C67]; 2xAcetyl:2H(3) [K62; K64]	FALSE		0.000341108	0	1	1	2	Q9UMY4	Q9UMY4 [56-69]	0	1795.01	0	4.055	2.02	0.689617	30.25	4.055	5.155	3.227	2.02	2.37	1.69	43.8	156.2	83.4	83.47	3	3	77.6	16.9	24.5	314.8	87.2	79	1	1	1	1	1	1	77.6	16.9	24.5	314.8	87.2
FALSE	High	[R].TNISDEESEQATEMLVHNAQNLMQSVKETVR.[E]	1xAcetyl:2H(3) [K27]	P18206 1xAcetyl:2H(3) [K1103]	FALSE		7.29285e-06	0	1	1	12	P18206	P18206 [1077-1107]	0	3576.7	0	1.73	0.79	0.822624	9.53	0.01	1.841	1.73	-6.64	0.88	0.79	73.4	126.6	27.45	9.19	3	2	131.3	86.9	81.2		160	140.5	1	1	1		1	1	131.3	86.9	81.2		160
FALSE	High	[R].TPAAETLSQLGQTLQSLKTR.[L]	1xAcetyl:2H(3) [K18]	Q15818 1xAcetyl:2H(3) [K141]	FALSE		4.64091e-05	0	1	1	5	Q15818	Q15818 [124-143]	0	2188.2	0	0.254	-1.98	0.175408	4.14	0.144	0.254	0.684	-2.79	-1.98	-0.55	139.6	60.4	85.28	28.87	3	3	319	101.3	64.1	46	25.7	43.8	1	1	1	1	1	1	319	101.3	64.1	46	25.7
FALSE	High	[R].TPAAETLSQLGQTLQSLKTR.[L]	1xAcetyl:2H(3) [K18]; 1xAcetyl:2H(3) [N-Term]	Q15818 1xAcetyl:2H(3) [K141]; 1xAcetyl:2H(3) [N-Term]	FALSE		8.77585e-05	0	1	1	29	Q15818	Q15818 [124-143]	0	2233.23	0	0.396	-1.34	0.34806	2.46	0.251	0.438	0.396	-1.99	-1.19	-1.34	143.3	56.7	68.76	36.35	3	3	272.1	84.9	98.5	68.4	37.2	39	1	1	1	1	1	1	272.1	84.9	98.5	68.4	37.2
FALSE	High	[R].TPCQQELDQVLER.[I]	1xCarbamidomethyl [C3]	P18065 1xCarbamidomethyl [C227]	TRUE	FBS	0.000566975	0	1	2	12	P18065	P18065 [225-237]	0	1615.77	0	1.431	0.52	0.908243	12.48	0.862	1.551	1.431	-0.21	0.63	0.52	78.4	121.6	78.66	48.22	3	3	179.8	67.9	37.7	155.1	105.4	54	1	1	1	1	1	1	179.8	67.9	37.7	155.1	105.4
FALSE	High	[R].TPDLKALLNVVDNAR.[S]	1xAcetyl:2H(3) [K5]; 1xAcetyl:2H(3) [N-Term]	Q8IV08 1xAcetyl:2H(3) [K309]; 1xAcetyl:2H(3) [N-Term]	FALSE		0.000509866	0	1	1	12	Q8IV08	Q8IV08 [305-319]	0	1728.98	0	0.866	-0.21	0.980687	27.33	0.51	1.079	0.866	-0.97	0.11	-0.21	107.4	92.6	24.59	18.06	3	3	144.7	96.9	96.5	73.7	104.6	83.6	1	1	1	1	1	1	144.7	96.9	96.5	73.7	104.6
FALSE	High	[R].TPDVLKKCQQAEKILKEQER.[L]	1xCarbamidomethyl [C8]; 4xAcetyl:2H(3) [K6; K7; K13; K16]; 1xAcetyl:2H(3) [N-Term]	P31948 1xCarbamidomethyl [C339]; 4xAcetyl:2H(3) [K337; K338; K344; K347]; 1xAcetyl:2H(3) [N-Term]	FALSE		8.27094e-07	0	1	1	42	P31948	P31948 [332-351]	0	2666.47	0	2.067	1.05	0.374511	19.91	0.727	2.345	2.067	-0.46	1.23	1.05	65.2	134.8	79.62	11.62	3	3	169.9	41.7	54.5	123.5	97.8	112.6	1	1	1	1	1	1	169.9	41.7	54.5	123.5	97.8
FALSE	High	[R].TPKTLKIAEIQAR.[R]	2xAcetyl:2H(3) [K3; K6]	Q15262 2xAcetyl:2H(3) [K394; K397]	FALSE		0.00116513	0	1	1	1	Q15262	Q15262 [392-404]	0	1558.94	0	0.638	-0.65	0.85441	21.43	0.411	0.638	2.239	-1.28	-0.65	1.16	116.5	83.5	47.71	51.1	3	3	165.8	95.3	64.8	68.2	60.8	145.1	1	1	1	1	1	1	165.8	95.3	64.8	68.2	60.8
FALSE	High	[R].TPLSDSGVTQR.[Y]	1xAcetyl:2H(3) [N-Term]	Q9NPF4 1xAcetyl:2H(3) [N-Term]	FALSE		0.00352175	0	1	1	10	Q9NPF4	Q9NPF4 [313-323]	0	1205.62	0	1.522	0.61	0.983531	56.36	0.762	2.1	1.522	-0.39	1.07	0.61	84.5	115.5	38.16	27.11	3	3	124.2	71	63.8	94.6	149.2	97.2	1	1	1	1	1	1	124.2	71	63.8	94.6	149.2
FALSE	High	[R].TPSDVKELVLDNSR.[S]	1xAcetyl:2H(3) [K6]	P39687 1xAcetyl:2H(3) [K20]	FALSE		0.000513747	0	1	1	35	P39687	P39687 [15-28]	0	1617.85	0	0.735	-0.44	0.965722	8.65	0.814	0.735	0.375	-0.3	-0.44	-1.41	122.8	77.2	35.47	53.85	3	3	85.2	169.2	110.3	69.4	124.4	41.4	1	1	1	1	1	1	85.2	169.2	110.3	69.4	124.4
FALSE	High	[R].TPSDVKELVLDNSR.[S]	1xAcetyl:2H(3) [K6]; 1xAcetyl:2H(3) [N-Term]	P39687 1xAcetyl:2H(3) [K20]; 1xAcetyl:2H(3) [N-Term]	FALSE		0.000822098	0	1	1	28	P39687	P39687 [15-28]	0	1662.88	0	0.799	-0.32	0.975159	7.65	0.923	0.799	0.735	-0.12	-0.32	-0.44	115.3	84.7	17.69	9.13	3	3	88	122.1	121.7	81.2	97.6	89.4	1	1	1	1	1	1	88	122.1	121.7	81.2	97.6
FALSE	High	[L].TPTDTFQTVETLTCLSLER.[N]	1xCarbamidomethyl [C14]	Q8TAM1 1xCarbamidomethyl [C525]	FALSE		0.00250469	0	1	1	24	Q8TAM1	Q8TAM1 [512-530]	0	2212.08	0	0.841	-0.25	0.99284	13.43	1.125	0.841	0.733	0.17	-0.25	-0.45	102.6	97.4	20.4	18.25	3	3	86.6	129.4	102.6	97.4	108.8	75.2	1	1	1	1	1	1	86.6	129.4	102.6	97.4	108.8
FALSE	High	[K].TPVSEKVTKCCTESLVNR.[R]	2xCarbamidomethyl [C10; C11]; 2xAcetyl:2H(3) [K6; K9]	P02769 2xCarbamidomethyl [C499; C500]; 2xAcetyl:2H(3) [K495; K498]	TRUE	FBS	0.000956699	0	1	1	10	P02769	P02769 [490-507]	0	2198.11	0	0.289	-1.79	0.260871	6.53	1.669	0.289	0.136	0.74	-1.79	-2.88	155.2	44.8	63.67	38.95	3	3	39.7	199.1	209	66.2	57.5	28.5	1	1	1	1	1	1	39.7	199.1	209	66.2	57.5
FALSE	High	[R].TQCIADKPEEKSLCFR.[L]	2xCarbamidomethyl [C3; C14]; 2xAcetyl:2H(3) [K7; K11]; 1xAcetyl:2H(3) [N-Term]	Q9NS15 2xCarbamidomethyl [C394; C405]; 2xAcetyl:2H(3) [K398; K402]; 1xAcetyl:2H(3) [N-Term]	FALSE		0.000367985	0	1	1	1	Q9NS15	Q9NS15 [392-407]	0	2117.04	0	0.999	0	0.975159	0	0.999			0			100.1	99.9			1	1	300.2			299.8			1			1			300.2			299.8
FALSE	High	[R].TQGTKIASDGLKGR.[V]	2xAcetyl:2H(3) [K5; K12]	P61247 2xAcetyl:2H(3) [K56; K63]	FALSE		0.000525569	0	1	1	5	P61247	P61247 [52-65]	0	1521.85	0	2.152	1.11	0.963859	41.18	0.709	2.75	2.152	-0.5	1.46	1.11	53.3	146.7	127.76	65.13	3	3	244.2	31.9	20.1	173	87.7	43.2	1	1	1	1	1	1	244.2	31.9	20.1	173	87.7
FALSE	High	[R].TQKTGGADQSLQQGEGSKKGKGKKKK.[-]	8xAcetyl:2H(3) [K3; K18; K19; K21; K23; K24; K25; K26]	P09132 8xAcetyl:2H(3) [K121; K136; K137; K139; K141; K142; K143; K144]	FALSE		0.00184989	0	1	1	10	P09132	P09132 [119-144]	0	3062.73	0	1.095	0.13	0.989912	1.19	2.012	1.087	1.095	1.01	0.12	0.13	87.1	112.9	11.04	33.43	3	3	79.3	94.7	78	159.6	102.9	85.4	1	1	1	1	1	1	79.3	94.7	78	159.6	102.9
FALSE	High	[R].TQSGLQSYLLQFHGLVR.[L]	1xAcetyl:2H(3) [N-Term]	Q9UNN8 1xAcetyl:2H(3) [N-Term]	FALSE		6.38185e-05	0	1	1	8	Q9UNN8	Q9UNN8 [82-98]	0	1992.07	0	1.427	0.51	0.964373	109.34	0.01	1.427	2.479	-6.64	0.51	1.31	64.7	135.3	15.11	23.92	3	2	75.4	100	81		142.7	200.8	1	1	1		1	1	75.4	100	81		142.7
FALSE	High	[R].TRDELEVIHLIEEHR.[L]			FALSE		0.000706425	0	1	1	9	P10155	P10155 [238-252]	1	1888.99	0	4.644	2.22	0.246374	117.63	0.959	8.548	4.644	-0.06	3.1	2.22	46.3	153.7	102.8	25.2	3	3	132.6	13	38.3	127.2	111	178	1	1	1	1	1	1	132.6	13	38.3	127.2	111
FALSE	High	[R].TSIFWNDVKDPVSIEER.[A]	1xAcetyl:2H(3) [K9]	P55884 1xAcetyl:2H(3) [K324]	FALSE		0.000219709	0	1	1	3	P55884	P55884 [316-332]	0	2080.04	0	100	6.64	1.64805e-16	0	0.01	100	100	-6.64	6.64	6.64	100.5	99.5		44.59	1	2	194.4				138.9	266.7	1				1	1	194.4				138.9
FALSE	High	[R].TSPCDNFDCQNGAQCIVR.[I]	3xCarbamidomethyl [C4; C9; C15]	O94813 3xCarbamidomethyl [C1125; C1130; C1136]	FALSE		0.0011476	0	1	1	2	O94813	O94813 [1122-1139]	0	2141.88	0	100	6.64	1.64805e-16	0	0.315	100	100	-1.67	6.64	6.64	142.8	57.2		37.9	1	3	254.1			80	101.8	164.2	1			1	1	1	254.1			80	101.8
FALSE	High	[R].TLVVHEKADDLGKGGNE.[E]	2xAcetyl:2H(3) [K7; K13]; 1xAcetyl:2H(3) [N-Term]	P00441 2xAcetyl:2H(3) [K123; K129]; 1xAcetyl:2H(3) [N-Term]	FALSE		0.00316752	0	1	1	14	P00441	P00441 [117-133]	0	1916.99	0	0.81	-0.3	0.975159	37.45	0.81	1.228	0.498	-0.3	0.3	-1.01	89.8	110.2	93.87	53.05	3	3	50.4	59.9	250.6	40.8	73.5	124.7	1	1	1	1	1	1	50.4	59.9	250.6	40.8	73.5
FALSE	High	[R].TASDAGFPVGSHVQYR.[C]	1xAcetyl:2H(3) [N-Term]	Q6UXD5 1xAcetyl:2H(3) [N-Term]	FALSE		0.000767871	0	1	1	18	Q6UXD5	Q6UXD5 [717-732]	0	1736.84	0	0.936	-0.1	0.987505	19.06	0.936	0.799	2.387	-0.1	-0.32	1.26	78.8	121.2	36.95	41.67	3	3	126.4	76.9	64.1	118.3	61.4	152.9	1	1	1	1	1	1	126.4	76.9	64.1	118.3	61.4
FALSE	High	[R].TLVVHEKADDLGKGGNE.[E]	2xAcetyl:2H(3) [K7; K13]	P00441 2xAcetyl:2H(3) [K123; K129]	FALSE		0.00344266	0	1	1	15	P00441	P00441 [117-133]	0	1871.96	0	1.056	0.08	0.998323	32.91	1.55	0.821	1.056	0.63	-0.28	0.08	109.8	90.2	57.04	51.37	3	3	44.1	92.9	154.8	68.4	76.3	163.5	1	1	1	1	1	1	44.1	92.9	154.8	68.4	76.3
FALSE	High	[A].TLTFDHSLEAQWTKWKAMHNR.[L]	2xAcetyl:2H(3) [K14; K16]; 1xAcetyl:2H(3) [N-Term]	P07711 2xAcetyl:2H(3) [K31; K33]; 1xAcetyl:2H(3) [N-Term]	FALSE		1.01505e-06	0	1	1	35	P07711	P07711 [18-38]	0	2735.37	0	0.564	-0.83	0.816172	10.1	0.685	0.303	0.564	-0.55	-1.72	-0.83	130.3	69.7	30.26	18.49	3	3	114.4	182.2	108.6	78.3	55.2	61.3	1	1	1	1	1	1	114.4	182.2	108.6	78.3	55.2
FALSE	High	[K].TKGKSADFTNFDPR.[G]	2xAcetyl:2H(3) [K2; K4]	P00918 2xAcetyl:2H(3) [K169; K171]	FALSE		0.00388601	0	1	1	8	P00918	P00918 [168-181]	0	1673.84	0	0.83	-0.27	0.950396	6.66	0.83	0.456	0.884	-0.27	-1.13	-0.18	137.3	62.7	91.86	111.88	3	3	37.4	69	228.9	31	31.5	202.3	1	1	1	1	1	1	37.4	69	228.9	31	31.5
FALSE	High	[Y].TKKAPQLTSPELMALTR.[K]	2xAcetyl:2H(3) [K2; K3]	Q3SZ57 2xAcetyl:2H(3) [K438; K439]	TRUE	FBS	0.000335973	0	1	1	3	Q3SZ57	Q3SZ57 [437-453]	0	1975.12	0	0.91	-0.14	0.987505	55.44	2.081	0.5	0.91	1.06	-1	-0.14	104	96	13.54	56.47	3	3	80.6	102.3	103.8	167.8	51.1	94.5	1	1	1	1	1	1	80.6	102.3	103.8	167.8	51.1
FALSE	High	[R].TKNALDPMSVLLAR.[S]	1xAcetyl:2H(3) [K2]	P42785 1xAcetyl:2H(3) [K462]	FALSE		0.000330915	0	1	1	15	P42785	P42785 [461-474]	0	1573.88	0	0.564	-0.83	0.774085	15.61	0.377	0.564	0.947	-1.41	-0.83	-0.08	102.7	97.3	66.19	32.43	3	3	229.8	78.1	82.9	86.7	44.1	78.5	1	1	1	1	1	1	229.8	78.1	82.9	86.7	44.1
FALSE	High	[R].TKNALDPMSVLLAR.[S]	1xAcetyl:2H(3) [K2]; 1xAcetyl:2H(3) [N-Term]	P42785 1xAcetyl:2H(3) [K462]; 1xAcetyl:2H(3) [N-Term]	FALSE		0.00156583	0	1	1	13	P42785	P42785 [461-474]	0	1618.91	0	0.641	-0.64	0.857343	21.48	0.415	1.394	0.641	-1.27	0.48	-0.64	121.9	78.1	61.89	14.43	3	3	198.8	45.4	128	82.5	63.3	82	1	1	1	1	1	1	198.8	45.4	128	82.5	63.3
[truncated: 5,733 more rows]
[truncated: 31 more columns]
