# Supplementary material for: An SDS-PAGE based proteomic approach for N-terminome profiling
Source: Royal Society of Chemistry journal article supplement (doi:10.1039/c9an01616c), 2019-01-01
Supplement: c9an01616c5.xlsx [file c9an01616c5.xlsx]

## Sheet: Table-S4
Accession	Input Sequence	Protein found	Recommended Protein Name	Other Names and IDs	Species	Chromosome	P10 to P1	P1' to P10'	P1' Position	Full protein length (aa)	Expected start (pos 1,2, or after signal-, pro-, or transit-peptide)	UniProt curated start	Alternative Spliced Start	Cleaving proteases	Other experimental terminus evidences	Alternative Translation Start	Protease Web Connections	N-terminal Features (Start to P1)	Features spanning terminus (P1 to P1')	C-terminal Features (P1' to End)	Distance To signal peptide	Distance to propeptide lost	Distance to last transmembrane domain (shed)	Distance to transit peptide (mitochondria)
P22626	KLFIGGLSFETTEESLR	YES	Heterogeneous nuclear ribonucleoproteins A2/B1	HNRNPA2B1;Heterogeneous nuclear ribonucleoproteins A2/B1;ROA2;	(Human)	7	RKKREKEQFR	KLFIGGLSFE	22	353					Subtiligase Based Positive Selection			MOD_RES (N-acetylmethionine.);MOTIF (Nuclear localization signal (Potential).)	DOMAIN (RRM 1.);CHAIN (Heterogeneous nuclear ribonucleoproteins A2/B1.)	MOD_RES (Phosphoserine.);MOD_RES (N6,N6-dimethyllysine.);MOD_RES (N6-acetyllysine.);MOD_RES (Dimethylated arginine; alternate.);MOD_RES (Omega-N-methylarginine; alternate.);MOD_RES (Phosphotyrosine.);COMPBIAS (Gly-rich.);REGION (Nuclear targeting sequence (By similarity).);DOMAIN (RRM 2.)
Q01469	KLKDGKLVVECVMNNVTCTR	YES	Fatty acid-binding protein, epidermal	FABP5;Fatty acid-binding protein, epidermal;Epidermal-type fatty acid-binding protein Short=E-FABP ;Fatty acid-binding protein 5 ;Psoriasis-associated fatty acid-binding protein homolog Short=PA-FABP;FABP5;	(Human)	8	WDGKESTITR	KLKDGKLVVE	110	135								MOD_RES (N-acetylalanine.);MOD_RES (N6-acetyllysine.);BINDING (Fatty acid (By similarity).);INIT_MET (Removed.)	CHAIN (Fatty acid-binding protein, epidermal.)	DISULFID ();MOD_RES (Phosphotyrosine.);REGION (Fatty acid binding (By similarity).)
P07711	KGKVFQEPLFYEAPR	YES	Cathepsin L1	CTSL;Cathepsin L1;Cathepsin L ;Major excreted protein Short=MEP;CATL1;C01.032	(Human)	9	MNGFQNRKPR	KGKVFQEPLF	102	333								SIGNAL (Potential.)	PROPEP (Activation peptide.)	DISULFID ();DISULFID (Interchain (between heavy and light chains).);ACT_SITE ();CHAIN (Cathepsin L1 heavy chain.);CHAIN (Cathepsin L1 light chain.);CARBOHYD (N-linked (GlcNAc...).);PROPEP ()	84	-190
O95989	LVGIFENQER	YES	Diphosphoinositol polyphosphate phosphohydrolase 1	NUDT3;Diphosphoinositol polyphosphate phosphohydrolase 1;Diadenosine 5',5'''-P1,P6-hexaphosphate hydrolase 1 EC=3.6.1.- ;Nucleoside diphosphate-linked moiety X motif 3 Short=Nudix motif 3;NUDT3;	(Human)	6	EAGVKGTLGR	LVGIFENQER	80	172								METAL (Magnesium 1; via carbonyl oxygen.);METAL (Magnesium 2.);METAL (Magnesium 3.);METAL (Magnesium 1.);MOTIF (Nudix box.);MOD_RES (N-acetylmethionine.);REGION (Substrate binding.);BINDING (Substrate.);ACT_SITE (Proton acceptor (Probable).);MUTAGEN (G->A,V: Loss of function.);MUTAGEN (G->A: Loss of function.);MUTAGEN (E->Q: Loss of function.);MUTAGEN (G->A: No effect.);MUTAGEN (G->V: Loss of fun…	CHAIN (Diphosphoinositol polyphosphate phosphohydrolase 1.);DOMAIN (Nudix hydrolase.)	REGION (Substrate binding.);MUTAGEN (G->A: Loss of function.);MUTAGEN (F->Y: Induces a strong decrease in Ap6A and [PP]-InsP4 hydrolysis, while it only weakly affects PP-InsP5 hydrolysis.);MUTAGEN (H->L: Induces a strong decrease in Ap6A and [PP]-InsP4 hydrolysis, while it only weakly affects PP-InsP5 hydrolysis.)
O75347	LVKEKVMYEKEAKQQEEKIEKMR	YES	Tubulin-specific chaperone A	TBCA;Tubulin-specific chaperone A;TCP1-chaperonin cofactor A ;Tubulin-folding cofactor A Short=CFA;TBCA;	(Human)	5	IKIKTGVVKR	LVKEKVMYEK	19	108								MOD_RES (N-acetylalanine (By similarity).);INIT_MET (Removed (By similarity).)	CHAIN (Tubulin-specific chaperone A.)
P20290	MKETIMNQEKLAKLQAQVR	YES	Transcription factor BTF3	BTF3;Transcription factor BTF3;Nascent polypeptide-associated complex subunit beta Short=NAC-beta ;RNA polymerase B transcription factor 3;BTF3;	(Human)	5	RGGTRGQEPQ	MKETIMNQEK	45	206				GRAB	Subtiligase Based Positive Selection	X	MMP2->CTSC->GZMB->BTF3	MOD_RES (Phosphoserine.)	CHAIN (Transcription factor BTF3.)	COMPBIAS (Poly-Asp.);DOMAIN (NAC-A/B.)
P02792	LGGPEAGLGEYLFER	YES	Ferritin light chain	FTL;Ferritin light chain;FRIL;	(Human)	19	MGDHLTNLHR	LGGPEAGLGE	155	175								METAL (Iron.);MOD_RES (N-acetylserine.);REGION (Catalytic site for iron oxidation.);INIT_MET (Removed.)	CHAIN (Ferritin light chain.);DOMAIN (Ferritin-like diiron.)
P09651	EQYGKIEVIEIMTDR	YES	Heterogeneous nuclear ribonucleoprotein A1	HNRNPA1;Heterogeneous nuclear ribonucleoprotein A1;Helix-destabilizing protein ;Single-strand RNA-binding protein ;hnRNP core protein A1;ROA1;	(Human)	12	TEEHHLRDYF	EQYGKIEVIE	126	372				MEP1B				MOD_RES (N-acetylmethionine.);MOD_RES (N-acetylserine; in Heterogeneous nuclear ribonucleoprotein A1, N-terminally processed.);MOD_RES (Phosphoserine.);MOD_RES (N6-acetyllysine.);INIT_MET (Removed; alternate.);REGION (Globular A domain.);DOMAIN (RRM 1.);CROSSLNK (Glycyl lysine isopeptide (Lys-Gly) (interchain with G-Cter in SUMO).)	REGION (Globular B domain.);DOMAIN (RRM 2.);CHAIN (Heterogeneous nuclear ribonucleoprotein A1.);CHAIN (Heterogeneous nuclear ribonucleoprotein A1, N-terminally processed.)	MOD_RES (Phosphoserine; by MKNK2.);MOD_RES (Asymmetric dimethylarginine; alternate (By similarity).);MOD_RES (Dimethylated arginine; alternate.);MOD_RES (Phosphoserine.);MOD_RES (Omega-N-methylarginine; alternate.);MOD_RES (N6-acetyllysine.);COMPBIAS (Gly-rich.);REGION (RNA-binding RGG-box.);REGION (Nuclear targeting sequence (M9).);MUTAGEN (G->A: No nuclear import nor export.);MUTAGEN (P->A: No …
O00584	EQPSPKQEVWLANGAAESR	YES	Ribonuclease T2	RNASET2;Ribonuclease T2;Ribonuclease 6;RNT2;	(Human)	6	QQLQNCTEPG	EQPSPKQEVW	218	256								ACT_SITE (By similarity.);DISULFID ();SIGNAL (Potential.);CARBOHYD (N-linked (GlcNAc...).)	DISULFID ();CHAIN (Ribonuclease T2.)		193
P49720	ETISQAMLNAVDR	YES	Proteasome subunit beta type-3	PSMB3;Proteasome subunit beta type-3;Proteasome chain 13 ;Proteasome component C10-II ;Proteasome theta chain;PSB3;T01.983	(Human)	17	EPNMDPDHLF	ETISQAMLNA	165	205								MOD_RES (N-acetylserine.);MOD_RES (N6-acetyllysine.);INIT_MET (Removed.)	CHAIN (Proteasome subunit beta type-3.)
P60983	ESLVVCDVAEDLVEKLR	YES	Glia maturation factor beta	GMFB;Glia maturation factor beta;GMFB;	(Human)	14	MS	ESLVVCDVAE	3	142		X			COFRADIC;other;N-TAILS			MOD_RES (N-acetylserine.);INIT_MET (Removed.)	CHAIN (Glia maturation factor beta.)	DOMAIN (ADF-H.)
Q15691	ETAVAPSLVAPALNKPKKPLTSSSAAPQRPISTQR	YES	Microtubule-associated protein RP/EB family member 1	MAPRE1;Microtubule-associated protein RP/EB family member 1;APC-binding protein EB1 ;End-binding protein 1 Short=EB1;MARE1;	(Human)	20	YDPVAARQGQ	ETAVAPSLVA	134	268				CATB			MMP2->A2M->CTSB->MAPRE1; MMP2->A2M->CTSB->MAPRE1; MMP2->CST3->CTSB->MAPRE1; MMP2->CTSL->CTSB->MAPRE1; MMP2->CST3->CTSB->MAPRE1; MMP2->CTSL->CTSB->MAPRE1	MOD_RES (N-acetylalanine.);MOD_RES (Phosphotyrosine.);DOMAIN (CH.);MUTAGEN (KK->EE: No effect.);MUTAGEN (K->E: Loss of binding to microtubules.);INIT_MET (Removed.)	CHAIN (Microtubule-associated protein RP/EB family member 1.);REGION (Interaction with MTUS2/TIP150.)	REGION (Interaction with CDK5RAP2.);REGION (DCTN1-binding.);REGION (APC-binding.);DOMAIN (EB1 C-terminal.)
P27797	EPAVYFKEQFLDGDGWTSR	YES	Calreticulin	CALR;Calreticulin;CRP55 ;Calregulin ;Endoplasmic reticulum resident protein 60 Short=ERp60 ;HACBP ;grp60;CALR;	(Human)	19	LLGLLGLAVA	EPAVYFKEQF	18	417	X	X			N-TAILS;Subtiligase Based Positive Selection			SIGNAL ()		DISULFID ();COMPBIAS (Asp/Glu/Lys-rich.);MOTIF (Prevents secretion from ER.);REPEAT (1-1.);REPEAT (1-2.);REPEAT (1-3.);REPEAT (1-4.);REPEAT (2-1.);REPEAT (2-2.);REPEAT (2-3.);MOD_RES (N6-acetyllysine.);CHAIN (Calreticulin.);BINDING (Carbohydrate (By similarity).);METAL (Calcium; via carbonyl oxygen.);METAL (Calcium.);CARBOHYD (N-linked (GlcNAc...).);REGION (N-domain.);REGION (4 X approximate repe…	0
P22314	EIIVTDMDTIEKSNLNR	YES	Ubiquitin-like modifier-activating enzyme 1	UBA1;Ubiquitin-like modifier-activating enzyme 1;Protein A1S9 ;Ubiquitin-activating enzyme E1;UBA1;	(Human)	X	MIGLGCGEGG	EIIVTDMDTI	499	1058								INIT_MET (Removed.);MOD_RES (N-acetylserine.);MOD_RES (Phosphoserine.);MOD_RES (Phosphotyrosine (By similarity).);REPEAT (1-1.)	REGION (2 approximate repeats.);CHAIN (Ubiquitin-like modifier-activating enzyme 1.);REPEAT (1-2.);NP_BIND (ATP (By similarity).)	MOD_RES (N6-succinyllysine (By similarity).);MOD_RES (N6-acetyllysine.);MOD_RES (Phosphothreonine.);MOD_RES (Phosphoserine.);MOD_RES (Phosphoserine (By similarity).);ACT_SITE (Glycyl thioester intermediate (By similarity).)
P0DMV9	ELEQVCNPIISGLYQGAGGPGPGGFGAQGPKGGSGSGPTIEEVD	no
P53634	EIQQKILHLPTSWDWR	YES	Dipeptidyl peptidase 1	CTSC;Dipeptidyl peptidase 1;Cathepsin C ;Cathepsin J ;Dipeptidyl peptidase I Short=DPP-I Short=DPPI ;Dipeptidyl transferase;CATC;C01.070	(Human)	11	PRPKPAPLTA	EIQQKILHLP	223	463				CATL1;CATC			MMP2->A2M->CTSL->CTSC; MMP2->A2M->CTSL->CTSC; MMP2->CST3->CTSL->CTSC; MMP2->CST3->CTSC->CTSC; MMP2->CTSL->CTSL->CTSC; MMP2->CTSL->CTSL->CTSC; MMP2->CTSL->CTSL->CTSC; MMP2->CTSL->CTSL->CTSC; MMP2->CTSL->CTSL->CTSC; MMP2->CTSL->CTSC->CTSC; MMP2->CTSL->CTSC; MMP2->CTSL->CTSC->CTSC; MMP2->CTSL->CTSC->CTSC; MMP2->CTSL->CTSC->CTSC; MMP2->CTSL->CTSC->CTSC; MMP2->CST3->CTSL->CTSC; MMP2->CST3->CTSC->CTSC;…	DISULFID ();SIGNAL ();CHAIN (Dipeptidyl peptidase 1 exclusion domain chain.);CARBOHYD (N-linked (GlcNAc...).)	PROPEP ()	DISULFID ();ACT_SITE ();CHAIN (Dipeptidyl peptidase 1 heavy chain.);CHAIN (Dipeptidyl peptidase 1 light chain.);BINDING (Chloride.);BINDING (Chloride; via amide nitrogen.);CARBOHYD (N-linked (GlcNAc...).)	198	-8
P13693	ENMNPDGMVALLDYR	YES	Translationally-controlled tumor protein	TPT1;Translationally-controlled tumor protein;Fortilin ;Histamine-releasing factor Short=HRF ;p23;TCTP;	(Human)	13	NFKNYQFFIG	ENMNPDGMVA	138	172								MOD_RES (Phosphoserine; by PLK1.);MOD_RES (Phosphoserine.)	CHAIN (Translationally-controlled tumor protein.)
P16949	ENNNFSKMAEEKLTHKMEANKENR	YES	Stathmin	STMN1;Stathmin;Leukemia-associated phosphoprotein p18 ;Metablastin ;Oncoprotein 18 Short=Op18 ;Phosphoprotein p19 Short=pp19 ;Prosolin ;Protein Pr22 ;pp17;STMN1;	(Human)	1	EKEVLQKAIE	ENNNFSKMAE	89	149					Subtiligase Based Positive Selection			MOD_RES (N-acetylalanine.);MOD_RES (N6-acetyllysine.);MOD_RES (Phosphoserine.);MOD_RES (Phosphoserine; by CDK1, MAPK1 and MAPK3.);MOD_RES (Phosphoserine; by PKA.);INIT_MET (Removed.)	DOMAIN (SLD.);CHAIN (Stathmin.);COILED (Potential.)	MOD_RES (N6-acetyllysine.)
Q92820	ELSRPHGDTAKKPIIGILMQKCR	YES	Gamma-glutamyl hydrolase	GGH;Gamma-glutamyl hydrolase;Conjugase ;GH ;Gamma-Glu-X carboxypeptidase;GGH;C26.001	(Human)	8	GLLLCGAASL	ELSRPHGDTA	22	318	X	X							SIGNAL (By similarity.)	CHAIN (Gamma-glutamyl hydrolase.);CARBOHYD (N-linked (GlcNAc...) (Potential).);CARBOHYD (N-linked (GlcNAc...).);CARBOHYD (N-linked (GlcNAc...); partial.);ACT_SITE (Nucleophile.);ACT_SITE (Proton donor.);DOMAIN (Gamma-glutamyl hydrolase.);MUTAGEN (C->A: Loss of activity.);MUTAGEN (H->N: Reduces activity 250-fold.);MUTAGEN (H->A: Loss of activity.);MUTAGEN (E->A: Slightly reduced catalytic activity…	-3
Q9Y3I0	GLGHQVATDALVAMEKAMKR	YES	tRNA-splicing ligase RtcB homolog	RTCB;tRNA-splicing ligase RtcB homolog;RTCB;	(Human)	22	VCVMIHSGSR	GLGHQVATDA	264	505								METAL (Zinc (Potential).);MUTAGEN (C->A: Abolishes tRNA ligase activity.)	CHAIN (tRNA-splicing ligase RtcB homolog.)
P11216	GLAGLGDVAEVR	YES	Glycogen phosphorylase, brain form	PYGB;Glycogen phosphorylase, brain form;PYGB;	(Human)	20	SEKRKQISVR	GLAGLGDVAE	18	843								MOD_RES (N-acetylalanine.);MOD_RES (Phosphoserine; by PHK; in form phosphorylase A.);INIT_MET (Removed.)	CHAIN (Glycogen phosphorylase, brain form.)	MOD_RES (Phosphotyrosine (By similarity).);MOD_RES (N6-(pyridoxal phosphate)lysine (By similarity).);BINDING (AMP (By similarity).);SITE (Involved in the association of subunits (By similarity).);SITE (May be involved in allosteric control (By similarity).)
P09651	GFGFVTYATVEEVDAAMNARPH	YES	Heterogeneous nuclear ribonucleoprotein A1	HNRNPA1;Heterogeneous nuclear ribonucleoprotein A1;Helix-destabilizing protein ;Single-strand RNA-binding protein ;hnRNP core protein A1;ROA1;	(Human)	12	MRDPNTKRSR	GFGFVTYATV	56	372					Subtiligase Based Positive Selection			MOD_RES (N-acetylmethionine.);MOD_RES (N-acetylserine; in Heterogeneous nuclear ribonucleoprotein A1, N-terminally processed.);MOD_RES (Phosphoserine.);MOD_RES (N6-acetyllysine.);INIT_MET (Removed; alternate.)	REGION (Globular A domain.);DOMAIN (RRM 1.);CHAIN (Heterogeneous nuclear ribonucleoprotein A1.);CHAIN (Heterogeneous nuclear ribonucleoprotein A1, N-terminally processed.)	MOD_RES (Phosphoserine; by MKNK2.);MOD_RES (Asymmetric dimethylarginine; alternate (By similarity).);MOD_RES (Dimethylated arginine; alternate.);MOD_RES (Phosphoserine.);MOD_RES (Omega-N-methylarginine; alternate.);MOD_RES (N6-acetyllysine.);COMPBIAS (Gly-rich.);REGION (Globular B domain.);REGION (RNA-binding RGG-box.);REGION (Nuclear targeting sequence (M9).);DOMAIN (RRM 2.);MUTAGEN (G->A: No nu…
P52848	GFIHNGIMVLPR	YES	Bifunctional heparan sulfate N-deacetylase/N-sulfotransferase 1	NDST1;Bifunctional heparan sulfate N-deacetylase/N-sulfotransferase 1;Glucosaminyl N-deacetylase/N-sulfotransferase 1 Short=NDST-1 ;N-heparan sulfate sulfotransferase 1 Short=N-HSST 1 ;[Heparan sulfate]-glucosamine N-sulfotransferase 1 Short=HSNST 1 Includes: RecName: Full=Heparan sulfate N-deacetylase 1 EC=3.-.-.- Includes: RecName: Full=Heparan sulfate N-sulfotransferase 1 EC=2.8.2.-;NDST1;	(Human)	5	PHLKPARYRR	GFIHNGIMVL	472	882								TOPO_DOM (Cytoplasmic (Potential).);CARBOHYD (N-linked (GlcNAc...) (Potential).);TRANSMEM (Helical; Signal-anchor for type II membrane protein; (Potential).)	TOPO_DOM (Lumenal (Potential).);CHAIN (Bifunctional heparan sulfate N- deacetylase/N-sulfotransferase 1.);REGION (Heparan sulfate N-deacetylase 1.)	DISULFID ();CARBOHYD (N-linked (GlcNAc...) (Potential).);REGION (Heparan sulfate N-sulfotransferase 1.);NP_BIND (PAPS.);BINDING (PAPS.);ACT_SITE (For sulfotransferase activity.);MUTAGEN (K->A: Loss of sulfotransferase activity.)			432
P68363	GHYTIGKEIIDLVLDR	YES	Tubulin alpha-1B chain	TUBA1B;Tubulin alpha-1B chain;Alpha-tubulin ubiquitous ;Tubulin K-alpha-1 ;Tubulin alpha-ubiquitous chain;TBA1B;	(Human)	12	KEDAANNYAR	GHYTIGKEII	106	451								MOD_RES (Phosphoserine.);MOD_RES (Nitrated tyrosine (By similarity).)	CHAIN (Tubulin alpha-1B chain.)	MOD_RES (Phosphoserine.);MOD_RES (Nitrated tyrosine (By similarity).);MOD_RES (Omega-N-methylarginine.);MOD_RES (Phosphotyrosine (By similarity).);MOD_RES (Phosphoserine (By similarity).);NP_BIND (GTP (Potential).);SITE (Involved in polymerization.);CROSSLNK (Glycyl lysine isopeptide (Lys-Gly) (interchain with G-Cter in ubiquitin).)
P04181	GKGIYLWDVEGR	YES	Ornithine aminotransferase, mitochondrial	OAT;Ornithine aminotransferase, mitochondrial;Ornithine delta-aminotransferase ;Ornithine--oxo-acid aminotransferase;OAT;	(Human)	10	YHPLPVALER	GKGIYLWDVE	65	439								MOD_RES (N6-acetyllysine (By similarity).);TRANSIT (Mitochondrion; in renal form.);TRANSIT (Mitochondrion; in hepatic form.)	CHAIN (Ornithine aminotransferase, hepatic form.);CHAIN (Ornithine aminotransferase, renal form.)	MOD_RES (N6-acetyllysine (By similarity).);MOD_RES (N6-succinyllysine (By similarity).);MOD_RES (N6-acetyllysine; alternate (By similarity).);MOD_RES (N6-succinyllysine; alternate (By similarity).);MOD_RES (N6-(pyridoxal phosphate)lysine.)				29
P09651	GFGFVTYATVEEVDAAMNAR	YES	Heterogeneous nuclear ribonucleoprotein A1	HNRNPA1;Heterogeneous nuclear ribonucleoprotein A1;Helix-destabilizing protein ;Single-strand RNA-binding protein ;hnRNP core protein A1;ROA1;	(Human)	12	MRDPNTKRSR	GFGFVTYATV	56	372					Subtiligase Based Positive Selection			MOD_RES (N-acetylmethionine.);MOD_RES (N-acetylserine; in Heterogeneous nuclear ribonucleoprotein A1, N-terminally processed.);MOD_RES (Phosphoserine.);MOD_RES (N6-acetyllysine.);INIT_MET (Removed; alternate.)	REGION (Globular A domain.);DOMAIN (RRM 1.);CHAIN (Heterogeneous nuclear ribonucleoprotein A1.);CHAIN (Heterogeneous nuclear ribonucleoprotein A1, N-terminally processed.)	MOD_RES (Phosphoserine; by MKNK2.);MOD_RES (Asymmetric dimethylarginine; alternate (By similarity).);MOD_RES (Dimethylated arginine; alternate.);MOD_RES (Phosphoserine.);MOD_RES (Omega-N-methylarginine; alternate.);MOD_RES (N6-acetyllysine.);COMPBIAS (Gly-rich.);REGION (Globular B domain.);REGION (RNA-binding RGG-box.);REGION (Nuclear targeting sequence (M9).);DOMAIN (RRM 2.);MUTAGEN (G->A: No nu…
P17066	HLGGEDFDNR	YES	Heat shock 70 kDa protein 6	HSPA6;Heat shock 70 kDa protein 6;Heat shock 70 kDa protein B';HSP76;	(Human)	1	FEVKATAGDT	HLGGEDFDNR	229	643								NP_BIND (ATP.);BINDING (ATP.)	CHAIN (Heat shock 70 kDa protein 6.)	MOD_RES (N6,N6,N6-trimethyllysine; by METTL21A; in vitro.);NP_BIND (ATP.);MUTAGEN (K->R: Complete loss of in vitro methylation by METTL21A.)
P12277	HGGYKPSDEHKTDLNPDNLQGGDDLDPNYVLSSR	YES	Creatine kinase B-type	CKB;Creatine kinase B-type;B-CK ;Creatine kinase B chain;KCRB;	(Human)	14	DLFDPIIEDR	HGGYKPSDEH	97	381				CATL1			MMP2->A2M->CTSL->CKB; MMP2->A2M->CTSL->CKB; MMP2->CST3->CTSL->CKB; MMP2->CTSL->CTSL->CKB; MMP2->CTSL->CTSL->CKB; MMP2->CTSL->CTSL->CKB; MMP2->CTSL->CTSL->CKB; MMP2->CTSL->CTSL->CKB; MMP2->CTSL->CKB; MMP2->CST3->CTSL->CKB; MMP2->CTSL->CTSL->CKB; MMP2->CTSL->CTSL->CKB; MMP2->CTSL->CTSL->CKB; MMP2->CTSL->CTSL->CKB; MMP2->CTSL->CTSL->CKB; MMP2->CTSL->CKB	MOD_RES (Phosphoserine.);MOD_RES (Phosphothreonine.);BINDING (Substrate; via amide nitrogen.);INIT_MET (Removed.)	CHAIN (Creatine kinase B-type.);DOMAIN (Phosphagen kinase N-terminal.)	MOD_RES (Phosphotyrosine (By similarity).);MOD_RES (Phosphoserine.);MOD_RES (Nitrated tyrosine (By similarity).);NP_BIND (ATP.);BINDING (ATP.);BINDING (Substrate.);BINDING (ATP (By similarity).);DOMAIN (Phosphagen kinase C-terminal.);MUTAGEN (C->S,Y: Complete loss of activity.);MUTAGEN (R->H,L,Q: Complete loss of activity.);MUTAGEN (R->K: 42% of wild-type activity.);MUTAGEN (D->E: No change in ac…
P62826	GPIKFNVWDTAGQEKFGGLR	YES	GTP-binding nuclear protein Ran	RAN;GTP-binding nuclear protein Ran;Androgen receptor-associated protein 24 ;GTPase Ran ;Ras-like protein TC4 ;Ras-related nuclear protein;RAN;	(Human)	12	VHPLVFHTNR	GPIKFNVWDT	57	216								MOD_RES (N-acetylalanine.);INIT_MET (Removed.);NP_BIND (GTP (By similarity).);MUTAGEN (G->V: Blocks DNA replication; when associated with L-69.);MUTAGEN (T->L: Has low binding affinity for GTP and GDP. Almost completely abolishes interaction with BIRC5.)	CHAIN (GTP-binding nuclear protein Ran.)	MOD_RES (N6-acetyllysine.);MOD_RES (N6-acetyllysine; alternate.);MOD_RES (N6-succinyllysine; alternate (By similarity).);NP_BIND (GTP (By similarity).);MUTAGEN (Q->L: Blocks DNA replication; when associated with V-19.);MUTAGEN (Q->N: Unable to hydrolyze GTP. Increases binding to BIRC5 and promotes exaggerated spindle formation.);CROSSLNK (Glycyl lysine isopeptide (Lys-Gly) (interchain with G-Cter…
P09211	EVLAPGCLDAFPLLSAYVGR	YES	Glutathione S-transferase P	GSTP1;Glutathione S-transferase P;GST class-pi ;GSTP1-1;GSTP1;	(Human)	11	YNLLDLLLIH	EVLAPGCLDA	164	210								MOD_RES (Phosphotyrosine; by EGFR.);MOD_RES (N6-succinyllysine (By similarity).);MOD_RES (N6-acetyllysine.);REGION (Glutathione binding.);BINDING (Glutathione.);BINDING (Glutathione (By similarity).);DOMAIN (GST N-terminal.);MUTAGEN (Y->F: Reduces catalytic activity about 50-fold.);MUTAGEN (D->A: Reduces affinity for glutathione. Slightly reduced catalytic activity.);INIT_MET (Removed.)	CHAIN (Glutathione S-transferase P.);DOMAIN (GST C-terminal.)	MOD_RES (Phosphotyrosine; by EGFR.)
P37802	GASQAGMTGYGMPR	YES	Transgelin-2	TAGLN2;Transgelin-2;Epididymis tissue protein Li 7e ;SM22-alpha homolog;TAGL2;	(Human)	1	VIGLQMGTNR	GASQAGMTGY	183	199								MOD_RES (N-acetylalanine.);MOD_RES (N6-acetyllysine.);MOD_RES (Phosphoserine.);INIT_MET (Removed.);DOMAIN (CH.)	CHAIN (Transgelin-2.);REPEAT (Calponin-like.)
P18065	GDPECHLFYNEQQEAR	YES	Insulin-like growth factor-binding protein 2	IGFBP2;Insulin-like growth factor-binding protein 2;IBP2;I31.953	(Human)	2	KLIQGAPTIR	GDPECHLFYN	302	325								DISULFID ();SIGNAL ();DOMAIN (IGFBP N-terminal.);MUTAGEN (KKLR->NNLA: Does not disrupt growth- inhibiting activity.)	DISULFID ();CHAIN (Insulin-like growth factor-binding protein 2.);MOTIF (Cell attachment site.);DOMAIN (Thyroglobulin type-1.)	MUTAGEN (D->E: Does not disrupt growth-inhibiting activity.)	266
Q92820	GDTAKKPIIGILMQKCR	YES	Gamma-glutamyl hydrolase	GGH;Gamma-glutamyl hydrolase;Conjugase ;GH ;Gamma-Glu-X carboxypeptidase;GGH;C26.001	(Human)	8	AASLELSRPH	GDTAKKPIIG	28	318	X	X			Subtiligase Based Positive Selection			SIGNAL (By similarity.)	CHAIN (Gamma-glutamyl hydrolase.);DOMAIN (Gamma-glutamyl hydrolase.)	CARBOHYD (N-linked (GlcNAc...) (Potential).);CARBOHYD (N-linked (GlcNAc...).);CARBOHYD (N-linked (GlcNAc...); partial.);ACT_SITE (Nucleophile.);ACT_SITE (Proton donor.);MUTAGEN (C->A: Loss of activity.);MUTAGEN (H->N: Reduces activity 250-fold.);MUTAGEN (H->A: Loss of activity.);MUTAGEN (E->A: Slightly reduced catalytic activity.)	3
Q13011	TGSSAQEEASGVALGEAPDHSYESLR	YES	Delta(3,5)-Delta(2,4)-dienoyl-CoA isomerase, mitochondrial	ECH1;Delta(3,5)-Delta(2,4)-dienoyl-CoA isomerase, mitochondrial;ECH1;	(Human)	19	YPGLSISLRL	TGSSAQEEAS	34	328	X	X			Subtiligase Based Positive Selection			TRANSIT (Mitochondrion (Potential).)		CHAIN (Delta(3,5)-Delta(2,4)-dienoyl-CoA isomerase, mitochondrial.);MOTIF (Microbody targeting signal (Potential).);MOD_RES (N6-succinyllysine (By similarity).);MOD_RES (N6-acetyllysine.);BINDING (Substrate; via amide nitrogen (By similarity).);SITE (Important for catalytic activity (By similarity).)				0
P37802	TLMNLGGLAVAR	YES	Transgelin-2	TAGLN2;Transgelin-2;Epididymis tissue protein Li 7e ;SM22-alpha homolog;TAGL2;	(Human)	1	EGKNMACVQR	TLMNLGGLAV	128	199								MOD_RES (N-acetylalanine.);MOD_RES (N6-acetyllysine.);INIT_MET (Removed.)	DOMAIN (CH.);CHAIN (Transgelin-2.)	MOD_RES (Phosphoserine.);REPEAT (Calponin-like.)
P31943	STGEAFVQFASQEIAEKALKKHKER	YES	Heterogeneous nuclear ribonucleoprotein H	HNRNPH1;Heterogeneous nuclear ribonucleoprotein H;Heterogeneous nuclear ribonucleoprotein H, N-terminally processed;HNRH1;	(Human)	5	ITLPVDFQGR	STGEAFVQFA	151	449					Subtiligase Based Positive Selection			MOD_RES (N-acetylmethionine; in Heterogeneous nuclear ribonucleoprotein H; alternate.);MOD_RES (N-acetylmethionine; in Heterogeneous nuclear ribonucleoprotein H, N-terminally processed.);MOD_RES (Phosphoserine.);DOMAIN (RRM 1.);INIT_MET (Removed; alternate.)	CHAIN (Heterogeneous nuclear ribonucleoprotein H.);CHAIN (Heterogeneous nuclear ribonucleoprotein H, N-terminally processed.);DOMAIN (RRM 2.)	MOD_RES (Dimethylated arginine; alternate.);MOD_RES (Omega-N-methylarginine; alternate.);MOD_RES (Phosphotyrosine.);MOD_RES (Phosphoserine (By similarity).);REGION (2 X 16 AA Gly-rich approximate repeats.);REGION (2 X 19 AA perfect repeats.);REPEAT (1-1.);REPEAT (2-1.);REPEAT (2-2.);REPEAT (1-2.);DOMAIN (RRM 3.)
P62993	SVKFGNDVQHFKVLR	YES	Growth factor receptor-bound protein 2	GRB2;Growth factor receptor-bound protein 2;Adapter protein GRB2 ;Protein Ash ;SH2/SH3 adapter GRB2;GRB2;	(Human)	17	SESAPGDFSL	SVKFGNDVQH	98	217								MOD_RES (N-acetylmethionine.);MOD_RES (N6-acetyllysine.);DOMAIN (SH3 1.);MUTAGEN (P->L: Ineffective in DNA synthesis. Abolishes interaction with SHB; when associated with L-206.)	CHAIN (Growth factor receptor-bound protein 2.);DOMAIN (SH2.)	MOD_RES (N6-acetyllysine.);MOD_RES (Phosphothreonine.);DOMAIN (SH3 2.);MUTAGEN (G->R: Ineffective in DNA synthesis.);MUTAGEN (P->L: Abolishes interaction with SHB; when associated with L-49.)
P62937	VSFELFADKVPKTAENFR	YES	Peptidyl-prolyl cis-trans isomerase A	PPIA;Peptidyl-prolyl cis-trans isomerase A;Cyclophilin A ;Cyclosporin A-binding protein ;Rotamase A;PPIA;	(Human)	7	IAVDGEPLGR	VSFELFADKV	20	165				MEP1A	N-TAILS		MMP2->PLG->MEP1A->PPIA; MMP2->PLG->MEP1A->PPIA; MMP2->CST3->MEP1A->PPIA; MMP2->CST3->MEP1A->PPIA	MOD_RES (N-acetylmethionine.);MOD_RES (N-acetylvaline; partial; in Peptidyl- prolyl cis-trans isomerase A, N- terminally processed.);INIT_MET (Removed; alternate.)	DOMAIN (PPIase cyclophilin-type.);CHAIN (Peptidyl-prolyl cis-trans isomerase A.);CHAIN (Peptidyl-prolyl cis-trans isomerase A, N- terminally processed.)	MOD_RES (N6-acetyllysine; alternate.);MOD_RES (N6-acetyllysine.);MOD_RES (Phosphothreonine.);MOD_RES (N6-acetyllysine (By similarity).);MUTAGEN (W->A: 200-fold decrease of sensitivity to CsA.);MUTAGEN (W->F: 75-fold decrease of sensitivity to CsA.);CARBOHYD (N-linked (GlcNAc...) (Potential).);CROSSLNK (Glycyl lysine isopeptide (Lys-Gly) (interchain with G-Cter in ubiquitin); alternate.)
P15531	VMLGETNPADSKPGTIR	YES	Nucleoside diphosphate kinase A	NME1;Nucleoside diphosphate kinase A;Granzyme A-activated DNase Short=GAAD ;Metastasis inhibition factor nm23 ;NM23-H1 ;Tumor metastatic process-associated protein;NDKA;	(Human)	17	EGLNVVKTGR	VMLGETNPAD	89	152								MOD_RES (N-acetylalanine.);BINDING (ATP.);MUTAGEN (F->W: No loss of activity or substrate binding.);INIT_MET (Removed.)	CHAIN (Nucleoside diphosphate kinase A.)	CROSSLNK (Glycyl lysine isopeptide (Lys-Gly) (interchain with G-Cter in ubiquitin).);BINDING (ATP.);ACT_SITE (Pros-phosphohistidine intermediate.);MUTAGEN (P->S: Increased motility of carcinoma cells.);MUTAGEN (H->F: Loss of serine/threonine kinase activity. Some loss of motility of carcinoma cells.);MUTAGEN (H->G: Loss of activity.);MUTAGEN (S->A: Limited increase in motility of carcinoma cells.)
P62888	VAAKKTKKSLESINSR	YES	60S ribosomal protein L30	RPL30;60S ribosomal protein L30;RL30;	(Human)	8	M	VAAKKTKKSL	2	115	X	X			COFRADIC				CHAIN (60S ribosomal protein L30.)	MOD_RES (Phosphoserine.);MOD_RES (N6-acetyllysine.)
P21741	VAKKKDKVKKGGPGSECAEWAWGPCTPSSKDCGVGFR	YES	Midkine	MDK;Midkine;Amphiregulin-associated protein Short=ARAP ;Midgestation and kidney protein ;Neurite outgrowth-promoting factor 2 ;Neurite outgrowth-promoting protein;MK;	(Human)	11	LLALLALTSA	VAKKKDKVKK	21	143	X	X						SIGNAL ()		DISULFID ();CHAIN (Midkine.)	0
P37108	VLLESEQFLTELTR	YES	Signal recognition particle 14 kDa protein	SRP14;Signal recognition particle 14 kDa protein;18 kDa Alu RNA-binding protein;SRP14;	(Human)	15	M	VLLESEQFLT	2	136	X	X			COFRADIC;Subtiligase Based Positive Selection;other			INIT_MET (Removed.)		COMPBIAS (Ala/Thr-rich.);CHAIN (Signal recognition particle 14 kDa protein.)
Q9BWF3	VKLFIGNLPR	YES	RNA-binding protein 4	RBM4;RNA-binding protein 4;Lark homolog Short=hLark ;RNA-binding motif protein 4 ;RNA-binding motif protein 4a;RBM4;	(Human)	11	M	VKLFIGNLPR	2	364	X	X							CHAIN (RNA-binding protein 4.)	MOD_RES (Phosphoserine.);COMPBIAS (Poly-Ala.);REGION (Interaction with TNPO3.);DOMAIN (RRM 1.);DOMAIN (RRM 2.);MUTAGEN (Y->A: Abrogates regulation of alternative splice site selection; when associated with A-39; A-113 and A-115.);MUTAGEN (F->A: Abrogates regulation of alternative splice site selection; when associated with A-37; A-113 and A-115.);MUTAGEN (Y->A: Abrogates regulation of alternative…
P51665	PELAVQKVVVHPLVLLSVVDHFNR	YES	26S proteasome non-ATPase regulatory subunit 7	PSMD7;26S proteasome non-ATPase regulatory subunit 7;26S proteasome regulatory subunit RPN8 ;26S proteasome regulatory subunit S12 ;Mov34 protein homolog ;Proteasome subunit p40;PSMD7;M67.973	(Human)	16	M	PELAVQKVVV	2	324	X	X							CHAIN (26S proteasome non-ATPase regulatory subunit 7.)	MOD_RES (N6-acetyllysine.);MOD_RES (N6-acetyllysine (By similarity).);COMPBIAS (Glu/Lys-rich.);DOMAIN (MPN.);CROSSLNK (Glycyl lysine isopeptide (Lys-Gly) (interchain with G-Cter in ubiquitin).)
P12277	PFSNSHNALKLR	YES	Creatine kinase B-type	CKB;Creatine kinase B-type;B-CK ;Creatine kinase B chain;KCRB;	(Human)	14	M	PFSNSHNALK	2	381	X	X						INIT_MET (Removed.)		CHAIN (Creatine kinase B-type.);MOD_RES (Phosphoserine.);MOD_RES (Phosphothreonine.);MOD_RES (Phosphotyrosine (By similarity).);MOD_RES (Nitrated tyrosine (By similarity).);NP_BIND (ATP.);BINDING (Substrate; via amide nitrogen.);BINDING (ATP.);BINDING (Substrate.);BINDING (ATP (By similarity).);DOMAIN (Phosphagen kinase N-terminal.);DOMAIN (Phosphagen kinase C-terminal.);MUTAGEN (C->S,Y: Complete…
Q92820	PHGDTAKKPIIGILMQKCR	YES	Gamma-glutamyl hydrolase	GGH;Gamma-glutamyl hydrolase;Conjugase ;GH ;Gamma-Glu-X carboxypeptidase;GGH;C26.001	(Human)	8	CGAASLELSR	PHGDTAKKPI	26	318	X	X			Subtiligase Based Positive Selection			SIGNAL (By similarity.)	CHAIN (Gamma-glutamyl hydrolase.);DOMAIN (Gamma-glutamyl hydrolase.)	CARBOHYD (N-linked (GlcNAc...) (Potential).);CARBOHYD (N-linked (GlcNAc...).);CARBOHYD (N-linked (GlcNAc...); partial.);ACT_SITE (Nucleophile.);ACT_SITE (Proton donor.);MUTAGEN (C->A: Loss of activity.);MUTAGEN (H->N: Reduces activity 250-fold.);MUTAGEN (H->A: Loss of activity.);MUTAGEN (E->A: Slightly reduced catalytic activity.)	1
P0DMV9	NSTIPTKQTQIFTTYSDNQPGVLIQVYEGER	no
Q96CT7	PKKFQGENTKSAAAR	YES	Coiled-coil domain-containing protein 124	CCDC124;Coiled-coil domain-containing protein 124;CC124;	(Human)	19	M	PKKFQGENTK	2	223	X	X			COFRADIC				CHAIN (Coiled-coil domain-containing protein 124.)	MOD_RES (Phosphoserine.);COILED (Potential.)
P12277	NNHMAKVLTPELYAELR	YES	Creatine kinase B-type	CKB;Creatine kinase B-type;B-CK ;Creatine kinase B chain;KCRB;	(Human)	14	EDEFPDLSAH	NNHMAKVLTP	27	381			X					MOD_RES (Phosphoserine.);INIT_MET (Removed.)	CHAIN (Creatine kinase B-type.);DOMAIN (Phosphagen kinase N-terminal.)	MOD_RES (Phosphothreonine.);MOD_RES (Phosphotyrosine (By similarity).);MOD_RES (Phosphoserine.);MOD_RES (Nitrated tyrosine (By similarity).);NP_BIND (ATP.);BINDING (Substrate; via amide nitrogen.);BINDING (ATP.);BINDING (Substrate.);BINDING (ATP (By similarity).);DOMAIN (Phosphagen kinase C-terminal.);MUTAGEN (C->S,Y: Complete loss of activity.);MUTAGEN (R->H,L,Q: Complete loss of activity.);MUTA…
P30626	SGTVDPQELQKALTTMGFR	YES	Sorcin	SRI;Sorcin;22 kDa protein ;CP-22 Short=CP22 ;V19;SORCN;	(Human)	7	QHFISFDTDR	SGTVDPQELQ	117	198								DOMAIN (EF-hand 1.);DOMAIN (EF-hand 2.);MUTAGEN (F->L: Reduces affinity for calcium 5- fold.);CA_BIND (1 (Probable).)	DOMAIN (EF-hand 3.);CHAIN (Sorcin.);CA_BIND (2 (Probable).)	DOMAIN (EF-hand 4.)
P35268	SKSKITVTSEVPFSKR	YES	60S ribosomal protein L22	RPL22;60S ribosomal protein L22;EBER-associated protein Short=EAP ;Epstein-Barr virus small RNA-associated protein ;Heparin-binding protein HBp15;RL22;	(Human)	1	LGGGVVTIER	SKSKITVTSE	66	128				MEP1B				INIT_MET (Removed.)	CHAIN (60S ribosomal protein L22.)	MOD_RES (N6-succinyllysine (By similarity).);COMPBIAS (Asp/Glu-rich (highly acidic).)
Q14566	SKSLKQNINLSAPIMSR	YES	DNA replication licensing factor MCM6	MCM6;DNA replication licensing factor MCM6;p105MCM;MCM6;	(Human)	2	ANPISGHYDR	SKSLKQNINL	513	821								MOD_RES (N-acetylmethionine.);MOD_RES (Phosphoserine.);NP_BIND (ATP (Potential).)	CHAIN (DNA replication licensing factor MCM6.);DOMAIN (MCM.)	MOTIF (Arginine finger.);MOD_RES (N6-acetyllysine (By similarity).);MOD_RES (Phosphoserine.);MOD_RES (Phosphothreonine.);MUTAGEN (E->A,D: Impairs interaction with CTD1.);MUTAGEN (L->A: Impairs interaction with CTD1.)
A8MUU1	RTQTVCNFTDGALVQHQEWDGKESTITR	YES	Putative fatty acid-binding protein 5-like protein 3	FABP5P3;Putative fatty acid-binding protein 5-like protein 3;Fatty acid-binding protein 5 pseudogene 3;FB5L3;	(Human)		KFEENTADGR	RTQTVCNFTD	48	101									CHAIN (Putative fatty acid-binding protein 5- like protein 3.)
P54802	SFGMTPVLPAFAGHVPEAVTR	YES	Alpha-N-acetylglucosaminidase	NAGLU;Alpha-N-acetylglucosaminidase;N-acetyl-alpha-glucosaminidase Short=NAG;ANAG;	(Human)	17	LQHRVLDQMR	SFGMTPVLPA	235	743								COMPBIAS (Poly-Gly.);COMPBIAS (Poly-Ala.);SIGNAL ()	CHAIN (Alpha-N-acetylglucosaminidase 82 kDa form.);CHAIN (Alpha-N-acetylglucosaminidase 77 kDa form.)	CARBOHYD (N-linked (GlcNAc...) (Potential).);CARBOHYD (N-linked (GlcNAc...).)	211
P12956	SDSFENPVLQQHFR	YES	X-ray repair cross-complementing protein 6	XRCC6;X-ray repair cross-complementing protein 6;5'-deoxyribose-5-phosphate lyase Ku70 Short=5'-dRP lyase Ku70 ;70 kDa subunit of Ku antigen ;ATP-dependent DNA helicase 2 subunit 1 ;ATP-dependent DNA helicase II 70 kDa subunit ;CTC box-binding factor 75 kDa subunit Short=CTC75 Short=CTCBF ;DNA repair protein XRCC6 ;Lupus Ku autoantigen protein p70 Short=Ku70 ;Thyroid-lupus autoantigen Short=TLAA …	(Human)	22	IVEKLRFTYR	SDSFENPVLQ	475	609								ACT_SITE (Schiff-base intermediate with DNA; for 5'-deoxyribose-5-phosphate lyase activity (Probable).);INIT_MET (Removed.);MOD_RES (N-acetylserine.);MOD_RES (Phosphoserine; by PRKDC.);MOD_RES (N6-acetyllysine.);MOD_RES (Phosphothreonine.);MUTAGEN (K->A: Diminishes the ability to form a Schiff base. Abolishes adduct formation; when associated with A-160 and A-164.);MUTAGEN (K->A: Abolishes adduct…	CHAIN (X-ray repair cross-complementing protein 6.)	REGION (Interaction with DEAF1.);MOD_RES (Phosphoserine.);DOMAIN (SAP.)
O60911	SATGALEGQMFR	YES	Cathepsin L2	CTSV;Cathepsin L2;Cathepsin U ;Cathepsin V;CATL2;C01.009	(Human)	9	QKQCGSCWAF	SATGALEGQM	142	334				CATL1			MMP2->A2M->CTSL->CTSV; MMP2->A2M->CTSL->CTSV; MMP2->A2M->CTSL->CTSV; MMP2->A2M->CTSL->CTSV; MMP2->CST3->CTSL->CTSV; MMP2->CST3->CTSL->CTSV; MMP2->CTSL->CTSV; MMP2->CTSL->CTSV; MMP2->CTSL->CTSL->CTSV; MMP2->CTSL->CTSL->CTSV; MMP2->CTSL->CTSL->CTSV; MMP2->CTSL->CTSL->CTSV; MMP2->CTSL->CTSL->CTSV; MMP2->CTSL->CTSL->CTSV; MMP2->CTSL->CTSL->CTSV; MMP2->CTSL->CTSL->CTSV; MMP2->CTSL->CTSL->CTSV; MMP2->C…	ACT_SITE ();SIGNAL (Potential.);PROPEP (Activation peptide.)	DISULFID ();CHAIN (Cathepsin L2.)	DISULFID ();ACT_SITE ();CARBOHYD (N-linked (GlcNAc...).)	124	28
O14561	SDMPPLTLEGIQDR	YES	Acyl carrier protein, mitochondrial	NDUFAB1;Acyl carrier protein, mitochondrial;CI-SDAP ;NADH-ubiquinone oxidoreductase 9.6 kDa subunit;ACPM;	(Human)	16	GRVTQLCRQY	SDMPPLTLEG	69	156	X	X	X		Subtiligase Based Positive Selection;unknown			TRANSIT (Mitochondrion.)		MOD_RES (N6-acetyllysine (By similarity).);MOD_RES (O-(pantetheine 4'-phosphoryl)serine (Potential).);CHAIN (Acyl carrier protein, mitochondrial.)				0
O76061	ECYLKHDLCAAAQENTR	YES	Stanniocalcin-2	STC2;Stanniocalcin-2;Stanniocalcin-related protein Short=STC-related protein Short=STCRP;STC2;	(Human)	5	IREMVSQLQR	ECYLKHDLCA	138	302								SIGNAL (Potential.);CARBOHYD (N-linked (GlcNAc...) (Potential).)	CHAIN (Stanniocalcin-2.)		113
P27797	EKDKGLQTSQDAR	YES	Calreticulin	CALR;Calreticulin;CRP55 ;Calregulin ;Endoplasmic reticulum resident protein 60 Short=ERp60 ;HACBP ;grp60;CALR;	(Human)	19	LSSGKFYGDE	EKDKGLQTSQ	61	417								MOD_RES (N6-acetyllysine.);SIGNAL ();METAL (Calcium; via carbonyl oxygen.)	CHAIN (Calreticulin.);REGION (N-domain.)	DISULFID ();COMPBIAS (Asp/Glu/Lys-rich.);MOTIF (Prevents secretion from ER.);REPEAT (1-1.);REPEAT (1-2.);REPEAT (1-3.);REPEAT (1-4.);REPEAT (2-1.);REPEAT (2-2.);REPEAT (2-3.);MOD_RES (N6-acetyllysine.);BINDING (Carbohydrate (By similarity).);METAL (Calcium; via carbonyl oxygen.);METAL (Calcium.);CARBOHYD (N-linked (GlcNAc...).);REGION (4 X approximate repeats.);REGION (P-domain.);REGION (Interact…	43
P06276	EDDIIIATKNGKVR	YES	Cholinesterase	BCHE;Cholinesterase;Acylcholine acylhydrolase ;Butyrylcholine esterase ;Choline esterase II ;Pseudocholinesterase;CHLE;S09.980	(Human)	3	LCMLIGKSHT	EDDIIIATKN	29	602	X	X						SIGNAL ()		DISULFID ();DISULFID (Interchain.);MOD_RES (Phosphoserine.);ACT_SITE (Acyl-ester intermediate.);ACT_SITE (Charge relay system.);CHAIN (Cholinesterase.);CARBOHYD (N-linked (GlcNAc...) (complex).);CARBOHYD (N-linked (GlcNAc...).);REGION (Substrate binding.)	0
Q9Y237	EKHGKIMEAMEKLKSGMR	YES	Peptidyl-prolyl cis-trans isomerase NIMA-interacting 4	PIN4;Peptidyl-prolyl cis-trans isomerase NIMA-interacting 4;Parvulin-14 Short=Par14 Short=hPar14 ;Parvulin-17 Short=Par17 Short=hPar17 ;Peptidyl-prolyl cis-trans isomerase Pin4 Short=PPIase Pin4 ;Peptidyl-prolyl cis/trans isomerase EPVH Short=hEPVH ;Rotamase Pin4;PIN4;	(Human)	X	NAVKVRHILC	EKHGKIMEAM	46	131								MOD_RES (Phosphoserine; by CK2.);REGION (Necessary for association with the pre- rRNP complexes.);REGION (Necessary for nuclear localization and DNA-binding.);MUTAGEN (S->A: Abolishes phosphorylation and reduces strongly nuclear localization.);MUTAGEN (S->E: Does not abolish nuclear localization and reduces DNA-binding ability.)	DOMAIN (PpiC.);CHAIN (Peptidyl-prolyl cis-trans isomerase NIMA- interacting 4.)
Q06481	EAASEKQQLVETHLAR	YES	Amyloid-like protein 2	APLP2;Amyloid-like protein 2;APPH ;Amyloid protein homolog ;CDEI box-binding protein Short=CDEBP;APLP2;I02.016	(Human)	11	FQAMVKALEK	EAASEKQQLV	444	763								DISULFID (By similarity.);COMPBIAS (Asp/Glu-rich (highly acidic).);COMPBIAS (Poly-Glu.);SITE (Reactive bond (By similarity).);DOMAIN (BPTI/Kunitz inhibitor.);SIGNAL (Potential.)	TOPO_DOM (Extracellular (Potential).);CHAIN (Amyloid-like protein 2.)	MOTIF (NPXY motif.);TOPO_DOM (Cytoplasmic (Potential).);TRANSMEM (Helical; (Potential).);REGION (Interaction with DAB2 (By similarity).)	412		-273
P0DMV9	EADKKKVLDKCQEVISWLDANTLAEKDEFEHKR	no
O00560	EASAPIPHDGNLYPR	YES	Syntenin-1	SDCBP;Syntenin-1;Melanoma differentiation-associated protein 9 Short=MDA-9 ;Pro-TGF-alpha cytoplasmic domain-interacting protein 18 Short=TACIP18 ;Scaffold protein Pbp1 ;Syndecan-binding protein 1;SDCB1;	(Human)	8	ANPANPAILS	EASAPIPHDG	34	298					Subtiligase Based Positive Selection			MOD_RES (N-acetylserine.);INIT_MET (Removed.)	CHAIN (Syntenin-1.)	DOMAIN (PDZ 1.);DOMAIN (PDZ 2.)
P40926	EAGTEVVKAKAGAGSATLSMAYAGAR	YES	Malate dehydrogenase, mitochondrial	MDH2;Malate dehydrogenase, mitochondrial;MDHM;	(Human)	7	QLTALTGRIQ	EAGTEVVKAK	232	338								MOD_RES (N6-acetyllysine; alternate (By similarity).);MOD_RES (N6-succinyllysine; alternate (By similarity).);MOD_RES (N6-acetyllysine.);MOD_RES (N6-acetyllysine; alternate.);MOD_RES (N6-succinyllysine (By similarity).);NP_BIND (NAD.);TRANSIT (Mitochondrion (By similarity).);BINDING (NAD.);BINDING (Substrate.);ACT_SITE (Proton acceptor (By similarity).);MUTAGEN (K->R: No activation of enzyme acti…	CHAIN (Malate dehydrogenase, mitochondrial.)	MOD_RES (N6-acetyllysine; alternate (By similarity).);MOD_RES (N6-malonyllysine; alternate (By similarity).);MOD_RES (N6-succinyllysine; alternate (By similarity).);MOD_RES (N6-succinyllysine (By similarity).);MOD_RES (N6-acetyllysine; alternate.);MOD_RES (N6-malonyllysine; alternate.);BINDING (NAD.);MUTAGEN (K->R: No activation of enzyme activity on treatment with TSA or NAM; when associated wit…				207
Q15370	ECGFTSQTARPQAPATVGLAFR	YES	Transcription elongation factor B polypeptide 2	TCEB2;Transcription elongation factor B polypeptide 2;Elongin 18 kDa subunit ;Elongin-B Short=EloB ;RNA polymerase II transcription factor SIII subunit B ;SIII p18;ELOB;	(Human)	16	QLLDDGKTLG	ECGFTSQTAR	59	118					Subtiligase Based Positive Selection			MOD_RES (N-acetylmethionine.)	CHAIN (Transcription elongation factor B polypeptide 2.);DOMAIN (Ubiquitin-like.)
Q9UHV9	EHSLVIDTLKEVDETR	YES	Prefoldin subunit 2	PFDN2;Prefoldin subunit 2;PFD2;	(Human)	1	KAAELEMELN	EHSLVIDTLK	53	154				MEP1B					CHAIN (Prefoldin subunit 2.)
O43598	EHVAAAELGAR	YES	2'-deoxynucleoside 5'-phosphate N-hydrolase 1	DNPH1;2'-deoxynucleoside 5'-phosphate N-hydrolase 1;c-Myc-responsive protein RCL;DNPH1;	(Human)	6	RLRRFGTVLT	EHVAAAELGA	55	174								MOD_RES (N-acetylalanine.);MOD_RES (Phosphoserine.);REGION (Substrate binding (By similarity).);BINDING (Substrate (By similarity).);INIT_MET (Removed.)	CHAIN (2'-deoxynucleoside 5'-phosphate N- hydrolase 1.)	MOD_RES (Phosphoserine.);REGION (Substrate binding; shared with homodimeric partner (By similarity).);BINDING (Substrate (By similarity).)
O75390	ASASSTNLKDILADLIPKEQAR	YES	Citrate synthase, mitochondrial	CS;Citrate synthase, mitochondrial;Citrate (Si)-synthase;CISY;	(Human)	12	ASCLVLAARH	ASASSTNLKD	26	466	X	X			unknown;Subtiligase Based Positive Selection				TRANSIT (Mitochondrion.)	MOD_RES (N6-succinyllysine (By similarity).);MOD_RES (N6-acetyllysine; alternate (By similarity).);MOD_RES (N6-succinyllysine; alternate (By similarity).);MOD_RES (N6-acetyllysine; alternate.);MOD_RES (N6-acetyllysine.);MOD_RES (N6,N6,N6-trimethyllysine (By similarity).);ACT_SITE (By similarity.);CHAIN (Citrate synthase, mitochondrial.)				-2
O75347	EKVMYEKEAKQQEEKIEKMR	YES	Tubulin-specific chaperone A	TBCA;Tubulin-specific chaperone A;TCP1-chaperonin cofactor A ;Tubulin-folding cofactor A Short=CFA;TBCA;	(Human)	5	KTGVVKRLVK	EKVMYEKEAK	22	108			X					MOD_RES (N-acetylalanine (By similarity).);INIT_MET (Removed (By similarity).)	CHAIN (Tubulin-specific chaperone A.)
P27797	EEKDKGLQTSQDAR	YES	Calreticulin	CALR;Calreticulin;CRP55 ;Calregulin ;Endoplasmic reticulum resident protein 60 Short=ERp60 ;HACBP ;grp60;CALR;	(Human)	19	VLSSGKFYGD	EEKDKGLQTS	60	417								MOD_RES (N6-acetyllysine.);SIGNAL ();METAL (Calcium; via carbonyl oxygen.)	CHAIN (Calreticulin.);REGION (N-domain.)	DISULFID ();COMPBIAS (Asp/Glu/Lys-rich.);MOTIF (Prevents secretion from ER.);REPEAT (1-1.);REPEAT (1-2.);REPEAT (1-3.);REPEAT (1-4.);REPEAT (2-1.);REPEAT (2-2.);REPEAT (2-3.);MOD_RES (N6-acetyllysine.);BINDING (Carbohydrate (By similarity).);METAL (Calcium; via carbonyl oxygen.);METAL (Calcium.);CARBOHYD (N-linked (GlcNAc...).);REGION (4 X approximate repeats.);REGION (P-domain.);REGION (Interact…	42
P62826	EFEKKYVATLGVEVHPLVFHTNR	YES	GTP-binding nuclear protein Ran	RAN;GTP-binding nuclear protein Ran;Androgen receptor-associated protein 24 ;GTPase Ran ;Ras-like protein TC4 ;Ras-related nuclear protein;RAN;	(Human)	12	TTFVKRHLTG	EFEKKYVATL	34	216								MOD_RES (N-acetylalanine.);INIT_MET (Removed.);NP_BIND (GTP (By similarity).);MUTAGEN (G->V: Blocks DNA replication; when associated with L-69.);MUTAGEN (T->L: Has low binding affinity for GTP and GDP. Almost completely abolishes interaction with BIRC5.)	CHAIN (GTP-binding nuclear protein Ran.)	MOD_RES (N6-acetyllysine.);MOD_RES (N6-acetyllysine; alternate.);MOD_RES (N6-succinyllysine; alternate (By similarity).);NP_BIND (GTP (By similarity).);MUTAGEN (Q->L: Blocks DNA replication; when associated with V-19.);MUTAGEN (Q->N: Unable to hydrolyze GTP. Increases binding to BIRC5 and promotes exaggerated spindle formation.);CROSSLNK (Glycyl lysine isopeptide (Lys-Gly) (interchain with G-Cter…
P06753	EEEIKILTDKLKEAETR	YES	Tropomyosin alpha-3 chain	TPM3;Tropomyosin alpha-3 chain;Gamma-tropomyosin ;Tropomyosin-3 ;Tropomyosin-5 Short=hTM5;TPM3;	(Human)	1	EKYSQKEDKY	EEEIKILTDK	223	285									CHAIN (Tropomyosin alpha-3 chain.);COILED (By similarity.)
P12277	AGVHIKLPNLGKHEKFSEVLKR	YES	Creatine kinase B-type	CKB;Creatine kinase B-type;B-CK ;Creatine kinase B chain;KCRB;	(Human)	14	CPSNLGTGLR	AGVHIKLPNL	293	381								MOD_RES (Phosphoserine.);MOD_RES (Phosphothreonine.);MOD_RES (Phosphotyrosine (By similarity).);MOD_RES (Nitrated tyrosine (By similarity).);NP_BIND (ATP.);BINDING (Substrate; via amide nitrogen.);BINDING (ATP.);BINDING (Substrate.);DOMAIN (Phosphagen kinase N-terminal.);MUTAGEN (C->S,Y: Complete loss of activity.);MUTAGEN (R->H,L,Q: Complete loss of activity.);MUTAGEN (R->K: 42% of wild-type act…	CHAIN (Creatine kinase B-type.);DOMAIN (Phosphagen kinase C-terminal.)	NP_BIND (ATP.);BINDING (ATP.);BINDING (ATP (By similarity).);MUTAGEN (D->E: No change in activity.)
P27797	EKQMKDKQDEEQR	YES	Calreticulin	CALR;Calreticulin;CRP55 ;Calregulin ;Endoplasmic reticulum resident protein 60 Short=ERp60 ;HACBP ;grp60;CALR;	(Human)	19	NETWGVTKAA	EKQMKDKQDE	354	417								DISULFID ();REPEAT (1-1.);REPEAT (1-2.);REPEAT (1-3.);REPEAT (1-4.);REPEAT (2-1.);REPEAT (2-2.);REPEAT (2-3.);MOD_RES (N6-acetyllysine.);SIGNAL ();BINDING (Carbohydrate (By similarity).);METAL (Calcium; via carbonyl oxygen.);METAL (Calcium.);CARBOHYD (N-linked (GlcNAc...).);REGION (N-domain.);REGION (4 X approximate repeats.);REGION (P-domain.);REGION (Interaction with PPIB (By similarity).);REGI…	COMPBIAS (Asp/Glu/Lys-rich.);CHAIN (Calreticulin.);REGION (C-domain.)	MOTIF (Prevents secretion from ER.)	336
Q13257	EKSQKAIQDEIR	YES	Mitotic spindle assembly checkpoint protein MAD2A	MAD2L1;Mitotic spindle assembly checkpoint protein MAD2A;Mitotic arrest deficient 2-like protein 1 Short=MAD2-like protein 1;MD2L1;	(Human)	4	KTAKDDSAPR	EKSQKAIQDE	118	205								MOD_RES (N-acetylalanine.);MUTAGEN (L->A: Leads to formation the closed conformation and homodimerization.);MUTAGEN (W->A: Prevents interaction with CDC20 and leads to formation of the closed conformation; when associated with A-133.);INIT_MET (Removed.)	CHAIN (Mitotic spindle assembly checkpoint protein MAD2A.);DOMAIN (HORMA.)	MOD_RES (Phosphoserine.);REGION (Required for assuming the closed conformation and for interaction with CDC20.);MUTAGEN (R->A: Prevents aggregation and promotes formation of monomeric protein that slowly interconverts between the open and closed conformation.);MUTAGEN (L->A: Leads to formation of the closed conformation; when associated with A-133.);MUTAGEN (Y->A: Leads to formation of the closed…
O75882	AAAAAAVSGSAAAEAKECDRPCVNGGR	YES	Attractin	ATRN;Attractin;DPPT-L ;Mahogany homolog;ATRN;	(Human)	20	LLLLPCEAEA	AAAAAAVSGS	84	1429	X	X			unknown;Subtiligase Based Positive Selection			COMPBIAS (Leu-rich.);SIGNAL (Potential.);PROPEP (Probable.)		DISULFID (By similarity.);TOPO_DOM (Extracellular (Potential).);TOPO_DOM (Cytoplasmic (Potential).);REPEAT (Kelch 1.);REPEAT (Kelch 2.);REPEAT (Kelch 3.);REPEAT (Kelch 4.);REPEAT (Kelch 5.);REPEAT (Kelch 6.);DOMAIN (EGF-like.);DOMAIN (CUB.);DOMAIN (PSI 1.);DOMAIN (PSI 2.);DOMAIN (C-type lectin.);DOMAIN (PSI 3.);DOMAIN (PSI 4.);DOMAIN (Laminin EGF-like 1.);DOMAIN (Laminin EGF-like 2.);TRANSMEM (He…	55	0	-1217
P83916	EESKPKKKKEESEKPR	YES	Chromobox protein homolog 1	CBX1;Chromobox protein homolog 1;HP1Hsbeta ;Heterochromatin protein 1 homolog beta Short=HP1 beta ;Heterochromatin protein p25 ;M31 ;Modifier 1 protein ;p25beta;CBX1;	(Human)	17	KADSDSEDKG	EESKPKKKKE	96	185								DOMAIN (Chromo 1.);MOD_RES (Phosphoserine.);BINDING (Histone H3K9me2 (By similarity).);BINDING (Histone H3A7 (By similarity).)	CHAIN (Chromobox protein homolog 1.)	DOMAIN (Chromo 2; shadow subtype.);MOD_RES (Phosphoserine.);MUTAGEN (I->E: Abolishes homodimer formation and binding to EMSY.);BINDING (PxVxL motif (By similarity).)
P15692	APMAEGGGQNHHEVVKFMDVYQR	YES	Vascular endothelial growth factor A	VEGFA;Vascular endothelial growth factor A;Vascular permeability factor Short=VPF;VEGFA;	(Human)	6	YLHHAKWSQA	APMAEGGGQN	27	232	X	X	X					SIGNAL ()		DISULFID ();DISULFID (Interchain.);CHAIN (Vascular endothelial growth factor A.);CARBOHYD (N-linked (GlcNAc...).)	0
P06733	EDTFIADLVVGLCTGQIKTGAPCR	YES	Alpha-enolase	ENO1;Alpha-enolase;2-phospho-D-glycerate hydro-lyase ;C-myc promoter-binding protein ;Enolase 1 ;MBP-1 ;MPB-1 ;Non-neural enolase Short=NNE ;Phosphopyruvate hydratase ;Plasminogen-binding protein;ENOA;	(Human)	1	VMVSHRSGET	EDTFIADLVV	377	434								METAL (Magnesium 1.);METAL (Magnesium 2.);MOD_RES (N-acetylserine.);MOD_RES (N6-acetyllysine.);MOD_RES (Phosphotyrosine.);MOD_RES (N6-acetyllysine; alternate (By similarity).);MOD_RES (N6-succinyllysine; alternate (By similarity).);MOD_RES (N6-acetyllysine; alternate.);MOD_RES (N6-acetyllysine (By similarity).);MOD_RES (N6-malonyllysine; alternate.);MOD_RES (Phosphoserine.);REGION (Epitope recogn…	CHAIN (Alpha-enolase.)	MOD_RES (N6-acetyllysine (By similarity).);MOD_RES (N6-acetyllysine; alternate.);MOD_RES (N6-malonyllysine; alternate.);MOD_RES (N6-succinyllysine; alternate (By similarity).);REGION (Required for interaction with PLG (By similarity).);BINDING (Substrate (By similarity).);MUTAGEN (L->A: Loss of transcriptional repression and cell growth inhibition; when associated with A-388.);MUTAGEN (L->A: Loss…
P62316	EFNTGPLSVLTQSVKNNTQVLINCR	YES	Small nuclear ribonucleoprotein Sm D2	SNRPD2;Small nuclear ribonucleoprotein Sm D2;snRNP core protein D2;SMD2;	(Human)	19	PEELQKREEE	EFNTGPLSVL	23	118								MOD_RES (N-acetylserine.);MOD_RES (Phosphothreonine.);INIT_MET (Removed.)	CHAIN (Small nuclear ribonucleoprotein Sm D2.)
Q04917	EKKNSVVEASEAAYKEAFEISKEQMQPTHPIR	YES	14-3-3 protein eta	YWHAH;14-3-3 protein eta;Protein AS1;1433F;	(Human)	22	YRYLAEVASG	EKKNSVVEAS	141	246								SITE (Interaction with phosphoserine on interacting protein.);INIT_MET (Removed.);MOD_RES (N-acetylglycine.);MOD_RES (Phosphoserine.);MOD_RES (Phosphoserine (By similarity).)	CHAIN (14-3-3 protein eta.)
O15144	MILLEVNNR	YES	Actin-related protein 2/3 complex subunit 2	ARPC2;Actin-related protein 2/3 complex subunit 2;Arp2/3 complex 34 kDa subunit Short=p34-ARC;ARPC2;	(Human)	2		MILLEVNNRI	1	300	X	X			COFRADIC;Subtiligase Based Positive Selection					MOD_RES (N6-acetyllysine.);CHAIN (Actin-related protein 2/3 complex subunit 2.)
P68431	KQLATKAAR	YES	Histone H3.1	HIST1H3J;Histone H3.1;Histone H3/a ;Histone H3/b ;Histone H3/c ;Histone H3/d ;Histone H3/f ;Histone H3/h ;Histone H3/i ;Histone H3/j ;Histone H3/k ;Histone H3/l;H31;	(Human)	6	RKSTGGKAPR	KQLATKAARK	19	136								MOD_RES (Asymmetric dimethylarginine; by PRMT6; alternate.);MOD_RES (Citrulline; alternate.);MOD_RES (Phosphothreonine; by GSG2.);MOD_RES (Allysine; alternate.);MOD_RES (N6,N6,N6-trimethyllysine; alternate.);MOD_RES (N6,N6-dimethyllysine; alternate.);MOD_RES (N6-acetyllysine; alternate.);MOD_RES (N6-crotonyl-L-lysine; alternate.);MOD_RES (N6-methyllysine; alternate.);MOD_RES (Phosphothreonine; by…	CHAIN (Histone H3.1.)	MOD_RES (N6-acetyllysine; alternate.);MOD_RES (N6-crotonyl-L-lysine; alternate.);MOD_RES (N6-methyllysine; alternate.);MOD_RES (Citrulline.);MOD_RES (N6,N6,N6-trimethyllysine; alternate.);MOD_RES (N6,N6-dimethyllysine; alternate.);MOD_RES (Phosphoserine; by AURKB, AURKC and RPS6KA5.);MOD_RES (N6-methyllysine.);MOD_RES (Phosphotyrosine.);MOD_RES (N6-methyllysine; by EHMT2; alternate.);MOD_RES (Pho…
Q01469	KTQTVCNFTDGALVQHQEWDGKESTITR	YES	Fatty acid-binding protein, epidermal	FABP5;Fatty acid-binding protein, epidermal;Epidermal-type fatty acid-binding protein Short=E-FABP ;Fatty acid-binding protein 5 ;Psoriasis-associated fatty acid-binding protein homolog Short=PA-FABP;FABP5;	(Human)	8	KFEETTADGR	KTQTVCNFTD	82	135								MOD_RES (N-acetylalanine.);MOD_RES (N6-acetyllysine.);INIT_MET (Removed.)	CHAIN (Fatty acid-binding protein, epidermal.)	DISULFID ();MOD_RES (Phosphotyrosine.);REGION (Fatty acid binding (By similarity).);BINDING (Fatty acid (By similarity).)
P30101	EATNPPVIQEEKPKKKKKAQEDL	YES	Protein disulfide-isomerase A3	PDIA3;Protein disulfide-isomerase A3;58 kDa glucose-regulated protein ;58 kDa microsomal protein Short=p58 ;Disulfide isomerase ER-60 ;Endoplasmic reticulum resident protein 57 Short=ER protein 57 Short=ERp57 ;Endoplasmic reticulum resident protein 60 Short=ER protein 60 Short=ERp60;PDIA3;	(Human)	15	LSDFISYLQR	EATNPPVIQE	483	505								MOD_RES (N6-succinyllysine (By similarity).);MOD_RES (N6-acetyllysine (By similarity).);ACT_SITE (Nucleophile (By similarity).);DISULFID (Redox-active; alternate (By similarity).);DISULFID (Interchain (with C-115 in TAPBP); alternate.);DISULFID ();DISULFID (Redox-active (By similarity).);SIGNAL ();DOMAIN (Thioredoxin 1.);MUTAGEN (C->A: No loss of activity. No loss of activity; when associated wit…	DOMAIN (Thioredoxin 2.);CHAIN (Protein disulfide-isomerase A3.)	MOD_RES (N6-acetyllysine (By similarity).);MOTIF (Prevents secretion from ER (By similarity).)	458
P30050	KKQKNIKHSGNITFDEIVNIAR	YES	60S ribosomal protein L12	RPL12;60S ribosomal protein L12;RL12;	(Human)	9	KALKEPPRDR	KKQKNIKHSG	93	165								MOD_RES (Phosphoserine.);MOD_RES (N6-acetyllysine.)	CHAIN (60S ribosomal protein L12.)
O00764	KIHSQEEALR	YES	Pyridoxal kinase	PDXK;Pyridoxal kinase;Pyridoxine kinase;PDXK;	(Human)	21	QFEAELLSGR	KIHSQEEALR	161	312								MOD_RES (N-acetylmethionine (By similarity).);MOD_RES (Phosphoserine.);BINDING (Substrate (By similarity).)	CHAIN (Pyridoxal kinase.)	MOD_RES (Phosphoserine.);NP_BIND (ATP (By similarity).);BINDING (Substrate (By similarity).)
P17066	TTPSYVAFTDTER	YES	Heat shock 70 kDa protein 6	HSPA6;Heat shock 70 kDa protein 6;Heat shock 70 kDa protein B';HSP76;	(Human)	1	EILANDQGNR	TTPSYVAFTD	39	643								NP_BIND (ATP.)	CHAIN (Heat shock 70 kDa protein 6.)	MOD_RES (N6,N6,N6-trimethyllysine; by METTL21A; in vitro.);NP_BIND (ATP.);BINDING (ATP.);MUTAGEN (K->R: Complete loss of in vitro methylation by METTL21A.)
Q8NCW5	SPPTVLVICGPGNNGGDGLVCAR	YES	NAD(P)H-hydrate epimerase	APOA1BP;NAD(P)H-hydrate epimerase;Apolipoprotein A-I-binding protein Short=AI-BP ;NAD(P)HX epimerase ;YjeF N-terminal domain-containing protein 1 Short=YjeF_N1;NNRE;	(Human)	1	KAYPPTSMSR	SPPTVLVICG	107	288								MOD_RES (Phosphoserine (By similarity).);TRANSIT (Mitochondrion (Potential).)	CHAIN (NAD(P)H-hydrate epimerase.);DOMAIN (YjeF N-terminal.)	METAL (Potassium (By similarity).);MOD_RES (N6-succinyllysine (By similarity).);REGION (NAD(P)HX (By similarity).);BINDING (NAD(P)HX (By similarity).)				59
P59998	SSKELLLQPVTISR	YES	Actin-related protein 2/3 complex subunit 4	ARPC4;Actin-related protein 2/3 complex subunit 4;Arp2/3 complex 20 kDa subunit Short=p20-ARC;ARPC4;	(Human)	3	RHNKPEVEVR	SSKELLLQPV	42	168								INIT_MET (Removed.);MOD_RES (N-acetylthreonine.)	CHAIN (Actin-related protein 2/3 complex subunit 4.)
P04085	SVKVAKVEYVR	YES	Platelet-derived growth factor subunit A	PDGFA;Platelet-derived growth factor subunit A;PDGF-1 ;Platelet-derived growth factor A chain ;Platelet-derived growth factor alpha polypeptide;PDGFA;	(Human)	7	KCQPSRVHHR	SVKVAKVEYV	149	211								PROPEP (Removed in mature form.);DISULFID ();DISULFID (Interchain.);SIGNAL ();CARBOHYD (N-linked (GlcNAc...) (Potential).)	DISULFID ();CHAIN (Platelet-derived growth factor subunit A.)	REGION (Receptor binding site (Potential).)	128	62
O60502	VQKESQATLEER	YES	Bifunctional protein NCOAT	MGEA5;Bifunctional protein NCOAT;Meningioma-expressed antigen 5 ;Nuclear cytoplasmic O-GlcNAcase and acetyltransferase Includes: RecName: Full=Protein O-GlcNAcase EC=3.2.1.169 ;Glycoside hydrolase O-GlcNAcase ;Hexosaminidase C ;N-acetyl-beta-D-glucosaminidase ;N-acetyl-beta-glucosaminidase ;O-GlcNAcase Short=OGA Includes: RecName: Full=Histone acetyltransferase Short=HAT EC=2.3.1.48;NCOAT;	(Human)	10	M	VQKESQATLE	2	916	X	X			Subtiligase Based Positive Selection;unknown;COFRADIC				CHAIN (Bifunctional protein NCOAT.)	DISULFID (By similarity.);MOD_RES (Phosphoserine.);REGION (Histone acetyltransferase activity (By similarity).);REGION (Required for histone H4 binding (By similarity).);ACT_SITE (Nucleophile; for O-GlcNAcase activity (By similarity).);ACT_SITE (Proton donor; for O-GlcNAcase activity (By similarity).)
Q9NXS2	VPLIGSLPEAR	YES	Glutaminyl-peptide cyclotransferase-like protein	QPCTL;Glutaminyl-peptide cyclotransferase-like protein;Golgi-resident glutaminyl-peptide cyclotransferase ;isoQC Short=gQC;QPCTL;M28.016	(Human)	19	EELPLGRELR	VPLIGSLPEA	70	382								TRANSMEM (Helical; (Potential).)	CHAIN (Glutaminyl-peptide cyclotransferase-like protein.)	ACT_SITE (Proton acceptor.);METAL (Zinc; catalytic.)			14
P54802	AAAVSEAEADFYEQNSR	YES	Alpha-N-acetylglucosaminidase	NAGLU;Alpha-N-acetylglucosaminidase;N-acetyl-alpha-glucosaminidase Short=NAG;ANAG;	(Human)	17	LLGSWLEQAR	AAAVSEAEAD	627	743								COMPBIAS (Poly-Gly.);COMPBIAS (Poly-Ala.);SIGNAL ();CARBOHYD (N-linked (GlcNAc...) (Potential).);CARBOHYD (N-linked (GlcNAc...).)	CHAIN (Alpha-N-acetylglucosaminidase 82 kDa form.);CHAIN (Alpha-N-acetylglucosaminidase 77 kDa form.)		603
P62877	VDTPSGTNSGAGKKR	YES	E3 ubiquitin-protein ligase RBX1	RBX1;E3 ubiquitin-protein ligase RBX1;Protein ZYP ;RING finger protein 75 ;RING-box protein 1 Short=Rbx1 ;Regulator of cullins 1;RBX1;	(Human)	22	MAAAMD	VDTPSGTNSG	7	108				GRAM;CASP3				MOD_RES (N-acetylmethionine.);MOD_RES (N-acetylalanine; in E3 ubiquitin-protein ligase RBX1, N-terminally processed.);INIT_MET (Removed; alternate.)	CHAIN (E3 ubiquitin-protein ligase RBX1.);CHAIN (E3 ubiquitin-protein ligase RBX1, N- terminally processed.)	MOD_RES (Phosphothreonine.);METAL (Zinc 1.);METAL (Zinc 3.);METAL (Zinc 2.);MUTAGEN (C->A: Strong reduction in ligase activity; when associated with A-56.);MUTAGEN (C->A: Strong reduction in ligase activity; when associated with A-53.);MUTAGEN (C->A: Strong reduction in ligase activity; when associated with A-77.);MUTAGEN (H->A: Strong reduction in ligase activity; when associated with A-75.);ZN_…
Q86UX2	PHFVVDFPLSR	YES	Inter-alpha-trypsin inhibitor heavy chain H5	ITIH5;Inter-alpha-trypsin inhibitor heavy chain H5;ITIH5;	(Human)		KISKTSVDGD	PHFVVDFPLS	682	942								SIGNAL (Potential.);CARBOHYD (N-linked (GlcNAc...) (Potential).);DOMAIN (VIT.);DOMAIN (VWFA.)	CHAIN (Inter-alpha-trypsin inhibitor heavy chain H5.)	CARBOHYD (N-linked (GlcNAc...) (Potential).)	665
P29373	PNFSGNWKIIR	YES	Cellular retinoic acid-binding protein 2	CRABP2;Cellular retinoic acid-binding protein 2;Cellular retinoic acid-binding protein II Short=CRABP-II;RABP2;	(Human)	1	M	PNFSGNWKII	2	138	X	X			COFRADIC				CHAIN (Cellular retinoic acid-binding protein 2.)	REGION (Retinoic acid binding.);MOTIF (Nuclear localization signal.);MUTAGEN (K->A: Loss of ligand-induced nuclear import; when associated with A-30 and A- 31.);MUTAGEN (R->A: Loss of ligand-induced nuclear import; when associated with A-21 and A- 31.);MUTAGEN (K->A: Loss of ligand-induced nuclear import; when associated with A-21 and A- 30.);CROSSLNK (Glycyl lysine isopeptide (Lys-Gly) (intercha…
Q07955	EAGDVCYADVYR	YES	Serine/arginine-rich splicing factor 1	SRSF1;Serine/arginine-rich splicing factor 1;Alternative-splicing factor 1 Short=ASF-1 ;Splicing factor, arginine/serine-rich 1 ;pre-mRNA-splicing factor SF2, P33 subunit;SRSF1;	(Human)	17	SWQDLKDHMR	EAGDVCYADV	143	248				CASP3				MOD_RES (N-acetylserine.);MOD_RES (Phosphoserine.);MOD_RES (N6-acetyllysine.);MOD_RES (Asymmetric dimethylarginine.);INIT_MET (Removed.);COMPBIAS (Gly-rich (hinge region).);DOMAIN (RRM 1.);MUTAGEN (FV->SR: In FV1; loss of ability to activate splicing. Slight reduction in splice site switching activity and no effect on RNA-binding.);MUTAGEN (R->A: Predominantly localizes to cytoplasm and fails to …	DOMAIN (RRM 2.);CHAIN (Serine/arginine-rich splicing factor 1.)	MOD_RES (N6-acetyllysine.);MOD_RES (Phosphoserine.);MOD_RES (Phosphoserine (By similarity).);COMPBIAS (Arg/Ser-rich (RS domain).);REGION (Interacts with SAFB1.);MUTAGEN (FV->SR: In FV2; loss of ability to activate splicing. Great reduction in splice site switching activity and RNA- binding.);MUTAGEN (F->A: In AV; loss of ability to activate splicing. Great reduction in splice site switching activ…
P12814	SGAQKAETAANR	YES	Alpha-actinin-1	ACTN1;Alpha-actinin-1;Alpha-actinin cytoskeletal isoform ;F-actin cross-linking protein ;Non-muscle alpha-actinin-1;ACTN1;	(Human)	14	TYVSSFYHAF	SGAQKAETAA	250	892								DOMAIN (Actin-binding.);DOMAIN (CH 1.);DOMAIN (CH 2.);MOD_RES (N-acetylmethionine.);MOD_RES (Phosphoserine.);MOD_RES (Phosphotyrosine; by FAK1.);MOD_RES (N6-acetyllysine.)	CHAIN (Alpha-actinin-1.)	CA_BIND (Potential.);REPEAT (Spectrin 1.);REPEAT (Spectrin 2.);REPEAT (Spectrin 3.);REPEAT (Spectrin 4.);DOMAIN (EF-hand 1.);DOMAIN (EF-hand 2.);MOD_RES (N6-acetyllysine.);REGION (Interaction with DDN.)
P61088	EQWKTNEAQAIETAR	YES	Ubiquitin-conjugating enzyme E2 N	UBE2N;Ubiquitin-conjugating enzyme E2 N;Bendless-like ubiquitin-conjugating enzyme ;Ubc13 ;UbcH13 ;Ubiquitin carrier protein N ;Ubiquitin-protein ligase N;UBE2N;	(Human)	12	PDDPLANDVA	EQWKTNEAQA	127	152								MUTAGEN (C->A: Loss of polyubiquitination of PCNA. Impairs interaction with SHPRH.);MUTAGEN (K->R: No ISGylation.);MUTAGEN (K->R: No effect on ISGylation.);CROSSLNK (Glycyl lysine isopeptide (Lys-Gly) (interchain with G-Cter in ISG15).);MOD_RES (N6-acetyllysine.);DISULFID (Interchain (with C-78 in ISG15).);ACT_SITE (Glycyl thioester intermediate.)	CHAIN (Ubiquitin-conjugating enzyme E2 N.)
P08758	EKVLTEIIASR	YES	Annexin A5	ANXA5;Annexin A5;Anchorin CII ;Annexin V ;Annexin-5 ;Calphobindin I Short=CBP-I ;Endonexin II ;Lipocortin V ;Placental anticoagulant protein 4 Short=PP4 ;Placental anticoagulant protein I Short=PAP-I ;Thromboplastin inhibitor ;Vascular anticoagulant-alpha Short=VAC-alpha;ANXA5;	(Human)	4	KHALKGAGTN	EKVLTEIIAS	107	320								REPEAT (Annexin 1.);INIT_MET (Removed.);MOD_RES (N-acetylalanine.);MOD_RES (N6-acetyllysine.)	REPEAT (Annexin 2.);CHAIN (Annexin A5.)	REPEAT (Annexin 3.);REPEAT (Annexin 4.);MOD_RES (N6-succinyllysine (By similarity).)
Q4VC31	EFQELLKVMR	YES	Coiled-coil domain-containing protein 58	CCDC58;Coiled-coil domain-containing protein 58;CCD58;	(Human)	3	SGGVNCEEFA	EFQELLKVMR	15	144								INIT_MET (Removed.);MOD_RES (N-acetylalanine.)	CHAIN (Coiled-coil domain-containing protein 58.)	MOD_RES (N6-acetyllysine.);COILED (Potential.)
P25398	EVLKTALIHDGLAR	YES	40S ribosomal protein S12	RPS12;40S ribosomal protein S12;RS12;	(Human)	6	GVMDVNTALQ	EVLKTALIHD	20	132								MOD_RES (N-acetylalanine.);INIT_MET (Removed.)	CHAIN (40S ribosomal protein S12.)	MOD_RES (N6-succinyllysine (By similarity).)
P22234	EKIKKACGNFGIPCELR	YES	Multifunctional protein ADE2	PAICS;Multifunctional protein ADE2;Phosphoribosylaminoimidazole-succinocarboxamide synthase EC=6.3.2.6;SAICAR synthetase Includes: RecName: Full=Phosphoribosylaminoimidazole carboxylase EC=4.1.1.21 ;AIR carboxylase Short=AIRC;PUR6;	(Human)	4	MGSTSDLGHC	EKIKKACGNF	282	425								MOD_RES (N-acetylalanine.);MOD_RES (Phosphotyrosine (By similarity).);MOD_RES (Phosphoserine.);MOD_RES (N6-acetyllysine (By similarity).);MOD_RES (Phosphothreonine.);MOD_RES (N6-acetyllysine.);INIT_MET (Removed.);ACT_SITE (For SAICAR synthetase activity.);REGION (SAICAR synthetase.);REGION (Linker.)	REGION (AIR carboxylase.);CHAIN (Multifunctional protein ADE2.)	ACT_SITE (For AIR carboxylase activity.);MUTAGEN (H->Y: Loss of AIR carboxylase activity.);MUTAGEN (S->A: Loss of AIR carboxylase activity.);MUTAGEN (G->A: Loss of AIR carboxylase activity.);MUTAGEN (S->A: No change of AIR carboxylase activity.);SITE (Essential for AIR carboxylase activity.)
P27797	EQFLDGDGWTSR	YES	Calreticulin	CALR;Calreticulin;CRP55 ;Calregulin ;Endoplasmic reticulum resident protein 60 Short=ERp60 ;HACBP ;grp60;CALR;	(Human)	19	AVAEPAVYFK	EQFLDGDGWT	25	417					Subtiligase Based Positive Selection			SIGNAL ()	CHAIN (Calreticulin.);REGION (N-domain.)	DISULFID ();COMPBIAS (Asp/Glu/Lys-rich.);MOTIF (Prevents secretion from ER.);REPEAT (1-1.);REPEAT (1-2.);REPEAT (1-3.);REPEAT (1-4.);REPEAT (2-1.);REPEAT (2-2.);REPEAT (2-3.);MOD_RES (N6-acetyllysine.);BINDING (Carbohydrate (By similarity).);METAL (Calcium; via carbonyl oxygen.);METAL (Calcium.);CARBOHYD (N-linked (GlcNAc...).);REGION (4 X approximate repeats.);REGION (P-domain.);REGION (Interact…	7
O43809	GVTQFGNKYIQQTKPLTLER	YES	Cleavage and polyadenylation specificity factor subunit 5	NUDT21;Cleavage and polyadenylation specificity factor subunit 5;Cleavage and polyadenylation specificity factor 25 kDa subunit Short=CFIm25 Short=CPSF 25 kDa subunit ;Nucleoside diphosphate-linked moiety X motif 21 Short=Nudix motif 21 ;Pre-mRNA cleavage factor Im 25 kDa subunit;CPSF5;	(Human)	16	PNRSQTGWPR	GVTQFGNKYI	16	227								INIT_MET (Removed.);MOD_RES (N-acetylserine.)	CHAIN (Cleavage and polyadenylation specificity factor subunit 5.);REGION (Necessary for RNA-binding.)	MOTIF (Nudix box.);SITE (Interaction with RNA.);DOMAIN (Nudix hydrolase.);MOD_RES (N6-acetyllysine.);MOD_RES (Phosphotyrosine.);MUTAGEN (K->R: Abolishes acetylation.);MUTAGEN (K->R: No effect on acetylation.);MUTAGEN (E->A: Reduces affinity for UGUA RNA by 88%.);MUTAGEN (R->S: Reduces affinity for UGUA RNA by 99%.);MUTAGEN (E->A: Reduces affinity for UGUA RNA by 12%.);MUTAGEN (F->A: Reduces affin…
O43583	ENSPKQEAGISEGQGTAGEEEEKKKQKR	YES	Density-regulated protein	DENR;Density-regulated protein;Protein DRP1 ;Smooth muscle cell-associated protein 3 Short=SMAP-3;DENR;	(Human)	12	FPNEFAKLTV	ENSPKQEAGI	71	198								MOD_RES (N-acetylalanine.);INIT_MET (Removed.)	CHAIN (Density-regulated protein.)	MOD_RES (Phosphoserine.);DOMAIN (SUI1.)
P29401	EGGIGEAVSSAVVGEPGITVTHLAVNR	YES	Transketolase	TKT;Transketolase;TKT;	(Human)	3	RILTVEDHYY	EGGIGEAVSS	565	623								MOD_RES (N-acetylmethionine.);MOD_RES (N6-acetyllysine.);MOD_RES (N6-acetyllysine (By similarity).);MOD_RES (Phosphotyrosine.);MOD_RES (Phosphothreonine.);MOD_RES (Phosphoserine.);ACT_SITE (Proton donor (By similarity).);NP_BIND (Thiamine pyrophosphate.);METAL (Magnesium.);METAL (Magnesium; via carbonyl oxygen.);BINDING (Substrate (By similarity).);BINDING (Thiamine pyrophosphate.);BINDING (Thiam…	CHAIN (Transketolase.)	MOD_RES (N6-acetyllysine.)
Q9GZZ1	ELGDVTPHNIKQLKR	YES	N-alpha-acetyltransferase 50	NAA50;N-alpha-acetyltransferase 50;N-acetyltransferase 13 ;N-acetyltransferase 5 Short=hNAT5 ;N-acetyltransferase san homolog Short=hSAN ;NatE catalytic subunit;NAA50;	(Human)	3	MKGSRI	ELGDVTPHNI	7	169									CHAIN (N-alpha-acetyltransferase 50.);DOMAIN (N-acetyltransferase.)	MOD_RES (Phosphothreonine.);MOD_RES (N6-acetyllysine.);MOD_RES (Phosphotyrosine.);REGION (Coenzyme A binding.)
E9PAV3	EIDEEPVSKAKQSR	YES	Nascent polypeptide-associated complex subunit alpha, muscle-specific form	NACA;Nascent polypeptide-associated complex subunit alpha, muscle-specific form;Alpha-NAC, muscle-specific form Short=skNAC;NACAM;	(Human)	12	TQQAQLAAAA	EIDEEPVSKA	1921	2078								COMPBIAS (Pro-rich.);MOTIF (PXLXP (By similarity).);MOD_RES (Phosphoserine; by ILK1 (By similarity).)	CHAIN (Nascent polypeptide-associated complex subunit alpha, muscle-specific form.)	MOD_RES (N6-acetyllysine.);MOD_RES (Phosphothreonine; by GSK3-beta (By similarity).);MOD_RES (Phosphothreonine.);MOD_RES (Phosphoserine.);REGION (Required for DNA-binding (By similarity).);DOMAIN (NAC-A/B.);DOMAIN (UBA.)
Q04917	ELDTLNEDSYKDSTLIMQLLR	YES	14-3-3 protein eta	YWHAH;14-3-3 protein eta;Protein AS1;1433F;	(Human)	22	AKQAFDDAIA	ELDTLNEDSY	207	246					Subtiligase Based Positive Selection			SITE (Interaction with phosphoserine on interacting protein.);INIT_MET (Removed.);MOD_RES (N-acetylglycine.);MOD_RES (Phosphoserine.);MOD_RES (Phosphoserine (By similarity).)	CHAIN (14-3-3 protein eta.)
Q13162	ETIIPDPAGKLKYFDKLN	YES	Peroxiredoxin-4	PRDX4;Peroxiredoxin-4;Antioxidant enzyme AOE372 Short=AOE37-2 ;Peroxiredoxin IV Short=Prx-IV ;Thioredoxin peroxidase AO372 ;Thioredoxin-dependent peroxide reductase A0372;PRDX4;	(Human)	X	VCPAGWKPGS	ETIIPDPAGK	254	271								ACT_SITE (Cysteine sulfenic acid (-SOH) intermediate (By similarity).);DISULFID (Interchain (with C-245); in linked form (By similarity).);DISULFID (Interchain (with C-124); in linked form (By similarity).);SIGNAL ();DOMAIN (Thioredoxin.)	CHAIN (Peroxiredoxin-4.)		216
O75494	GFAYVQFEDVR	YES	Serine/arginine-rich splicing factor 10	SRSF10;Serine/arginine-rich splicing factor 10;40 kDa SR-repressor protein Short=SRrp40 ;FUS-interacting serine-arginine-rich protein 1 ;Splicing factor SRp38 ;Splicing factor, arginine/serine-rich 13A ;TLS-associated protein with Ser-Arg repeats Short=TASR Short=TLS-associated protein with SR repeats ;TLS-associated serine-arginine protein Short=TLS-associated SR protein;SRS10;	(Human)	1	PLDFYTRRPR	GFAYVQFEDV	52	262				CATL1			MMP2->A2M->CTSL->SRSF10; MMP2->A2M->CTSL->SRSF10; MMP2->CST3->CTSL->SRSF10; MMP2->CTSL->SRSF10; MMP2->CTSL->CTSL->SRSF10; MMP2->CTSL->CTSL->SRSF10; MMP2->CTSL->CTSL->SRSF10; MMP2->CTSL->CTSL->SRSF10; MMP2->CTSL->CTSL->SRSF10; MMP2->CST3->CTSL->SRSF10; MMP2->CTSL->SRSF10; MMP2->CTSL->CTSL->SRSF10; MMP2->CTSL->CTSL->SRSF10; MMP2->CTSL->CTSL->SRSF10; MMP2->CTSL->CTSL->SRSF10; MMP2->CTSL->CTSL->SRSF10		DOMAIN (RRM.);CHAIN (Serine/arginine-rich splicing factor 10.)	MOD_RES (Phosphoserine.);COMPBIAS (Arg/Ser-rich (RS domain).)
P09651	EEVDAAMNARPHKVDGR	YES	Heterogeneous nuclear ribonucleoprotein A1	HNRNPA1;Heterogeneous nuclear ribonucleoprotein A1;Helix-destabilizing protein ;Single-strand RNA-binding protein ;hnRNP core protein A1;ROA1;	(Human)	12	GFGFVTYATV	EEVDAAMNAR	66	372				MEP1B				MOD_RES (N-acetylmethionine.);MOD_RES (N-acetylserine; in Heterogeneous nuclear ribonucleoprotein A1, N-terminally processed.);MOD_RES (Phosphoserine.);MOD_RES (N6-acetyllysine.);INIT_MET (Removed; alternate.)	REGION (Globular A domain.);DOMAIN (RRM 1.);CHAIN (Heterogeneous nuclear ribonucleoprotein A1.);CHAIN (Heterogeneous nuclear ribonucleoprotein A1, N-terminally processed.)	MOD_RES (Phosphoserine; by MKNK2.);MOD_RES (Asymmetric dimethylarginine; alternate (By similarity).);MOD_RES (Dimethylated arginine; alternate.);MOD_RES (Phosphoserine.);MOD_RES (Omega-N-methylarginine; alternate.);MOD_RES (N6-acetyllysine.);COMPBIAS (Gly-rich.);REGION (Globular B domain.);REGION (RNA-binding RGG-box.);REGION (Nuclear targeting sequence (M9).);DOMAIN (RRM 2.);MUTAGEN (G->A: No nu…
Q5JPE7	DGENYVVLLDSTLPR	YES	Nodal modulator 2	NOMO2;Nodal modulator 2;pM5 protein 2;NOMO2;	(Human)	16	LFFHFPPLLR	DGENYVVLLD	1106	1267								SIGNAL (Potential.);CARBOHYD (N-linked (GlcNAc...) (Potential).)	TOPO_DOM (Lumenal (Potential).);CHAIN (Nodal modulator 2.)	TOPO_DOM (Cytoplasmic (Potential).);TRANSMEM (Helical; (Potential).);MOD_RES (Phosphoserine (By similarity).)	1074		-71
P08670	EVDALKGTNESLER	YES	Vimentin	VIM;Vimentin;VIME;	(Human)	10	YRRQVQSLTC	EVDALKGTNE	329	466				GRAB	unknown;Subtiligase Based Positive Selection		MMP2->CTSC->GZMB->VIM	REGION (Head.);REGION (Coil 1A.);REGION (Linker 1.);REGION (Coil 1B.);REGION (Linker 12.);MOD_RES (N-acetylserine.);MOD_RES (Phosphoserine.);MOD_RES (Phosphoserine; by PKA and PKC; alternate.);MOD_RES (Phosphoserine; by PKC.);MOD_RES (Phosphothreonine.);MOD_RES (Phosphoserine; by PKC (By similarity).);MOD_RES (Phosphothreonine; alternate.);MOD_RES (Phosphoserine; alternate.);MOD_RES (Phosphotyros…	REGION (Rod.);REGION (Coil 2.);CHAIN (Vimentin.);COILED ()	REGION (Tail.);MOD_RES (N6-acetyllysine.);MOD_RES (Phosphoserine.);MOD_RES (Phosphothreonine.);MOD_RES (N6-acetyllysine; alternate.);MOD_RES (N6-succinyllysine; alternate (By similarity).);SITE (Stutter.)
P22102	SAGVQCFGPTAEAAQLESSKR	YES	Trifunctional purine biosynthetic protein adenosine-3	GART;Trifunctional purine biosynthetic protein adenosine-3;Phosphoribosylamine--glycine ligase EC=6.3.4.13;Glycinamide ribonucleotide synthetase Short=GARS ;Phosphoribosylglycinamide synthetase Includes: RecName: Full=Phosphoribosylformylglycinamidine cyclo-ligase EC=6.3.3.1 ;AIR synthase Short=AIRS ;Phosphoribosyl-aminoimidazole synthetase Includes: RecName: Full=Phosphoribosylglycinamide formyl…	(Human)	21	LAAGIVGNLR	SAGVQCFGPT	88	1010								MOD_RES (N-acetylalanine.);INIT_MET (Removed.)	CHAIN (Trifunctional purine biosynthetic protein adenosine-3.)	MOD_RES (N6-acetyllysine.);ACT_SITE (Proton donor (By similarity).);NP_BIND (ATP (By similarity).);REGION (AIRS.);REGION (GART.);REGION (5'-phosphoribosylglycinamide binding.);REGION (10-formyltetrahydrofolate binding.);METAL (Manganese (By similarity).);DOMAIN (ATP-grasp.);BINDING (10-formyltetrahydrofolate.);SITE (Raises pKa of active site His (By similarity).)
P00558	EVEKACANPAAGSVILLENLR	YES	Phosphoglycerate kinase 1	PGK1;Phosphoglycerate kinase 1;Cell migration-inducing gene 10 protein ;Primer recognition protein 2 Short=PRP 2;PGK1;	(Human)	X	VLFLKDCVGP	EVEKACANPA	103	417				GRAB			MMP2->CTSC->GZMB->PGK1	MOD_RES (N-acetylserine.);MOD_RES (N6-succinyllysine (By similarity).);MOD_RES (N6-acetyllysine.);MOD_RES (N6-acetyllysine; alternate.);MOD_RES (N6-succinyllysine; alternate (By similarity).);MOD_RES (Phosphotyrosine (By similarity).);MOD_RES (N6-acetyllysine (By similarity).);INIT_MET (Removed.);REGION (Substrate binding.);BINDING (Substrate.)	CHAIN (Phosphoglycerate kinase 1.)	MOD_RES (N6-acetyllysine; alternate.);MOD_RES (N6-malonyllysine; alternate.);MOD_RES (N6-acetyllysine.);MOD_RES (N6-succinyllysine (By similarity).);MOD_RES (Phosphotyrosine.);MOD_RES (Phosphoserine.);MOD_RES (N6-acetyllysine (By similarity).);NP_BIND (ATP.);BINDING (Substrate.);BINDING (ATP.);BINDING (ATP; via carbonyl oxygen.)
P08758	SEIDLFNIR	YES	Annexin A5	ANXA5;Annexin A5;Anchorin CII ;Annexin V ;Annexin-5 ;Calphobindin I Short=CBP-I ;Endonexin II ;Lipocortin V ;Placental anticoagulant protein 4 Short=PP4 ;Placental anticoagulant protein I Short=PAP-I ;Thromboplastin inhibitor ;Vascular anticoagulant-alpha Short=VAC-alpha;ANXA5;	(Human)	4	HTLIRVMVSR	SEIDLFNIRK	277	320								REPEAT (Annexin 1.);REPEAT (Annexin 2.);REPEAT (Annexin 3.);INIT_MET (Removed.);MOD_RES (N-acetylalanine.);MOD_RES (N6-acetyllysine.)	REPEAT (Annexin 4.);CHAIN (Annexin A5.)	MOD_RES (N6-succinyllysine (By similarity).)
P52597	EAFVQFASQELAEKALGKHKER	YES	Heterogeneous nuclear ribonucleoprotein F	HNRNPF;Heterogeneous nuclear ribonucleoprotein F;Nucleolin-like protein mcs94-1;HNRPF;	(Human)	10	PVDPEGKITG	EAFVQFASQE	154	415				GRAB			MMP2->CTSC->GZMB->HNRNPF	MOD_RES (N-acetylmethionine; in Heterogeneous nuclear ribonucleoprotein F; alternate.);MOD_RES (N-acetylmethionine; in Heterogeneous nuclear ribonucleoprotein F, N-terminally processed.);MOD_RES (Phosphoserine.);REGION (Interaction with RNA.);CROSSLNK (Glycyl lysine isopeptide (Lys-Gly) (interchain with G-Cter in SUMO).);DOMAIN (RRM 1.);MUTAGEN (W->A: Loss of RNA-binding.);MUTAGEN (E->A: Loss of …	CHAIN (Heterogeneous nuclear ribonucleoprotein F.);CHAIN (Heterogeneous nuclear ribonucleoprotein F, N-terminally processed.);DOMAIN (RRM 2.)	MOD_RES (Phosphoserine.);MOD_RES (N6-acetyllysine.);REGION (Interaction with RNA.);DOMAIN (RRM 3.);MUTAGEN (F->A: Drastically effects folding of RRM2.);MUTAGEN (K->A: Minimal effect on affinity for RNA oligonucleotide.);MUTAGEN (H->A: Little disruption of binding RNA.);MUTAGEN (R->A: Decreases affinity for RNA oligonucleotide 100-fold.);MUTAGEN (Y->A: Decreases affinity for RNA oligonucleotide 10…
P11441	MQLTVKALQGR	YES	Ubiquitin-like protein 4A	UBL4A;Ubiquitin-like protein 4A;Ubiquitin-like protein GDX;UBL4A;	(Human)	X		MQLTVKALQG	1	157	X	X			COFRADIC					DOMAIN (Ubiquitin-like.);MOD_RES (Phosphoserine.);CHAIN (Ubiquitin-like protein 4A.)
P67936	EAKHIAEEADR	YES	Tropomyosin alpha-4 chain	TPM4;Tropomyosin alpha-4 chain;TM30p1 ;Tropomyosin-4;TPM4;	(Human)	19	KMEIQEMQLK	EAKHIAEEAD	114	248								MOD_RES (N-acetylalanine.);INIT_MET (Removed.)	CHAIN (Tropomyosin alpha-4 chain.);COILED (By similarity.)	MOD_RES (N6-acetyllysine.)
P62316	EVPKSGKGKKKSKPVNKDR	YES	Small nuclear ribonucleoprotein Sm D2	SNRPD2;Small nuclear ribonucleoprotein Sm D2;snRNP core protein D2;SMD2;	(Human)	19	VLENVKEMWT	EVPKSGKGKK	76	118								MOD_RES (N-acetylserine.);MOD_RES (Phosphothreonine.);INIT_MET (Removed.)	CHAIN (Small nuclear ribonucleoprotein Sm D2.)
P38159	EKALEAVFGKYGR	YES	RNA-binding motif protein, X chromosome	RBMX;RNA-binding motif protein, X chromosome;Glycoprotein p43 ;Heterogeneous nuclear ribonucleoprotein G Short=hnRNP G;RBMX;	(Human)	X	FIGGLNTETN	EKALEAVFGK	21	391								MOD_RES (N-acetylmethionine; in Heterogeneous nuclear ribonucleoprotein G; alternate.);MOD_RES (N-acetylvaline; in Heterogeneous nuclear ribonucleoprotein G, N-terminally processed.);INIT_MET (Removed; alternate.)	DOMAIN (RRM.);CHAIN (RNA-binding motif protein, X chromosome.);CHAIN (RNA-binding motif protein, X chromosome, N-terminally processed.)	MOD_RES (N6-acetyllysine.);MOD_RES (Phosphoserine.);REGION (Necessary for the association to nascent RNAPII transcripts and nuclear localization.);REGION (Necessary for RNA-binding.);MUTAGEN (K->A: Promotes cell proliferation. Inhibits transcriptional up-regulation of the TXNIP promoter.)
P62249	PSKGPLQSVQVFGR	YES	40S ribosomal protein S16	RPS16;40S ribosomal protein S16;RS16;	(Human)	19	M	PSKGPLQSVQ	2	146	X	X			COFRADIC;Subtiligase Based Positive Selection			INIT_MET (Removed.)		MOD_RES (N6-acetyllysine.);CHAIN (40S ribosomal protein S16.)
P30101	ELSDFISYLQR	YES	Protein disulfide-isomerase A3	PDIA3;Protein disulfide-isomerase A3;58 kDa glucose-regulated protein ;58 kDa microsomal protein Short=p58 ;Disulfide isomerase ER-60 ;Endoplasmic reticulum resident protein 57 Short=ER protein 57 Short=ERp57 ;Endoplasmic reticulum resident protein 60 Short=ER protein 60 Short=ERp60;PDIA3;	(Human)	15	LNPKKYEGGR	ELSDFISYLQ	472	505								MOD_RES (N6-succinyllysine (By similarity).);MOD_RES (N6-acetyllysine (By similarity).);ACT_SITE (Nucleophile (By similarity).);DISULFID (Redox-active; alternate (By similarity).);DISULFID (Interchain (with C-115 in TAPBP); alternate.);DISULFID ();DISULFID (Redox-active (By similarity).);SIGNAL ();DOMAIN (Thioredoxin 1.);MUTAGEN (C->A: No loss of activity. No loss of activity; when associated wit…	DOMAIN (Thioredoxin 2.);CHAIN (Protein disulfide-isomerase A3.)	MOD_RES (N6-acetyllysine (By similarity).);MOTIF (Prevents secretion from ER (By similarity).)	447
P48444	VLLAAAVCTKAGKAIVSR	YES	Coatomer subunit delta	ARCN1;Coatomer subunit delta;Archain ;Delta-coat protein Short=Delta-COP;COPD;	(Human)	11	M	VLLAAAVCTK	2	511	X	X			COFRADIC;other				CHAIN (Coatomer subunit delta.)	DOMAIN (MHD.);MOD_RES (N6-acetyllysine.);MOD_RES (N6-acetyllysine (By similarity).);MOD_RES (Phosphoserine.)
P43121	ELLVNYVSDVR	YES	Cell surface glycoprotein MUC18	MCAM;Cell surface glycoprotein MUC18;Cell surface glycoprotein P1H12 ;Melanoma cell adhesion molecule ;Melanoma-associated antigen A32 ;Melanoma-associated antigen MUC18 ;S-endo 1 endothelial-associated antigen ;MUC18;	(Human)	11	TMISLLSEPQ	ELLVNYVSDV	337	646								DISULFID (Probable.);SIGNAL ();CARBOHYD (N-linked (GlcNAc...) (Potential).);DOMAIN (Ig-like V-type 1.);DOMAIN (Ig-like V-type 2.);DOMAIN (Ig-like C2-type 1.)	TOPO_DOM (Extracellular (Potential).);CHAIN (Cell surface glycoprotein MUC18.);DOMAIN (Ig-like C2-type 2.)	DISULFID (Probable.);TOPO_DOM (Cytoplasmic (Potential).);CARBOHYD (N-linked (GlcNAc...) (Potential).);CARBOHYD (N-linked (GlcNAc...).);TRANSMEM (Helical; (Potential).);MOD_RES (Phosphoserine.);DOMAIN (Ig-like C2-type 3.)	313		-247
P00367	EKQLTKSNAPR	YES	Glutamate dehydrogenase 1, mitochondrial	GLUD1;Glutamate dehydrogenase 1, mitochondrial;DHE3;	(Human)	10	DCDILIPAAS	EKQLTKSNAP	385	558								MOD_RES (N6-succinyllysine (By similarity).);MOD_RES (Phosphoserine (By similarity).);MOD_RES (N6-acetyllysine; alternate.);MOD_RES (N6-succinyllysine; alternate (By similarity).);MOD_RES (N6-acetyllysine; alternate (By similarity).);MOD_RES (Phosphotyrosine (By similarity).);MOD_RES (N6-acetyllysine (By similarity).);MOD_RES (ADP-ribosylcysteine.);NP_BIND (NAD (By similarity).);TRANSIT (Mitochon…	CHAIN (Glutamate dehydrogenase 1, mitochondrial.)	MOD_RES (N6-acetyllysine (By similarity).);MOD_RES (N6-acetyllysine; alternate (By similarity).);MOD_RES (N6-succinyllysine; alternate (By similarity).);MOD_RES (N6-malonyllysine; alternate (By similarity).);MOD_RES (N6-acetyllysine; alternate.);BINDING (Substrate (By similarity).);BINDING (NAD (By similarity).);BINDING (ADP (By similarity).);MUTAGEN (S->A: Reduces activity and inhibition by GTP.…				331
Q04917	VISSIEQKTMADGNEKKLEKVKAYR	YES	14-3-3 protein eta	YWHAH;14-3-3 protein eta;Protein AS1;1433F;	(Human)	22	VVGARRSSWR	VISSIEQKTM	62	246								SITE (Interaction with phosphoserine on interacting protein.);INIT_MET (Removed.);MOD_RES (N-acetylglycine.);MOD_RES (Phosphoserine.);MOD_RES (Phosphoserine (By similarity).)	CHAIN (14-3-3 protein eta.)	SITE (Interaction with phosphoserine on interacting protein.)
Q86UP2	ELDSLKDAVEHQR	YES	Kinectin	KTN1;Kinectin;CG-1 antigen ;Kinesin receptor;KTN1;	(Human)	14	REKEISGLWN	ELDSLKDAVE	1014	1357								TOPO_DOM (Cytoplasmic (Potential).);CARBOHYD (N-linked (GlcNAc...) (Potential).);TRANSMEM (Helical; Signal-anchor for type II membrane protein; (Potential).);MOD_RES (Phosphoserine.);MOD_RES (Phosphothreonine.);CROSSLNK (Glycyl lysine isopeptide (Lys-Gly) (interchain with G-Cter in ubiquitin).)	TOPO_DOM (Lumenal (Potential).);CHAIN (Kinectin.);COILED (Potential.)	CARBOHYD (N-linked (GlcNAc...) (Potential).)			984
P11279	EIKTVESITDIR	YES	Lysosome-associated membrane glycoprotein 1	LAMP1;Lysosome-associated membrane glycoprotein 1;CD107 antigen-like family member A ;LAMP1;	(Human)	13	THLFPNASSK	EIKTVESITD	135	417								DISULFID ();SIGNAL ();CARBOHYD (N-linked (GlcNAc...).);CARBOHYD (N-linked (GlcNAc...) (polylactosaminoglycan).)	TOPO_DOM (Lumenal (Potential).);CHAIN (Lysosome-associated membrane glycoprotein 1.);REGION (First lumenal domain.)	DISULFID ();TOPO_DOM (Cytoplasmic (Potential).);CARBOHYD (N-linked (GlcNAc...).);CARBOHYD (O-linked (GalNAc...); partial.);CARBOHYD (O-linked (GalNAc...).);CARBOHYD (N-linked (GlcNAc...) (polylactosaminoglycan).);TRANSMEM (Helical; (Potential).);REGION (Hinge.);REGION (Second lumenal domain.)	106		-271
Q13257	ESGPQFITNSEEVR	YES	Mitotic spindle assembly checkpoint protein MAD2A	MAD2L1;Mitotic spindle assembly checkpoint protein MAD2A;Mitotic arrest deficient 2-like protein 1 Short=MAD2-like protein 1;MD2L1;	(Human)	4	KDLVVPEKWE	ESGPQFITNS	169	205								MOD_RES (N-acetylalanine.);MUTAGEN (L->A: Leads to formation the closed conformation and homodimerization.);MUTAGEN (W->A: Prevents interaction with CDC20 and leads to formation of the closed conformation; when associated with A-133.);MUTAGEN (R->A: Prevents aggregation and promotes formation of monomeric protein that slowly interconverts between the open and closed conformation.);MUTAGEN (L->A: …	CHAIN (Mitotic spindle assembly checkpoint protein MAD2A.);DOMAIN (HORMA.)	MOD_RES (Phosphoserine.);REGION (Required for assuming the closed conformation and for interaction with CDC20.);MUTAGEN (S->A: Reduces phosphorylation on serine residues; when associated with A-178. Abolishes phosphorylation on serine residues; when associated with A-178 and A-195.);MUTAGEN (S->D: Abolishes interaction with MAD1L1 and reduces interaction with CDC20; when associated with D-178 and…
P18077	SNLPAKAIGHR	YES	60S ribosomal protein L35a	RPL35A;60S ribosomal protein L35a;Cell growth-inhibiting gene 33 protein;RL35A;	(Human)	3	NSGMVRAKFR	SNLPAKAIGH	90	110								MOD_RES (N6-acetyllysine.);MOD_RES (N6-acetyllysine; alternate (By similarity).);MOD_RES (N6-succinyllysine; alternate (By similarity).)	CHAIN (60S ribosomal protein L35a.)
P12081	EKGLAPEVADR	YES	Histidine--tRNA ligase, cytoplasmic	HARS;Histidine--tRNA ligase, cytoplasmic;Histidyl-tRNA synthetase Short=HisRS;SYHC;	(Human)	5	WEEVKNEMVG	EKGLAPEVAD	256	509								MOD_RES (N-acetylalanine.);INIT_MET (Removed.);DOMAIN (WHEP-TRS.)	CHAIN (Histidine--tRNA ligase, cytoplasmic.)
P63279	EPNIQDPAQAEAYTIYCQNR	YES	SUMO-conjugating enzyme UBC9	UBE2I;SUMO-conjugating enzyme UBC9;SUMO-protein ligase ;Ubiquitin carrier protein 9 ;Ubiquitin carrier protein I ;Ubiquitin-conjugating enzyme E2 I ;Ubiquitin-protein ligase I ;p18;UBC9;	(Human)	16	ILLGIQELLN	EPNIQDPAQA	122	158								REGION (Interaction with SUMO1.);MUTAGEN (RK->AA: Impairs binding to SUMO1 and catalytic activity.);MUTAGEN (F->A: Impairs binding to RANBP2.);MUTAGEN (V->A: Impairs binding to RANBP2.);MUTAGEN (E->A: Slightly impairs binding to RANBP2.);MUTAGEN (K->A: Slightly impairs binding to RANBP2.);MUTAGEN (L->A: Impairs binding to RANBP2.);MUTAGEN (K->A: Impairs binding to RANBP2.);MUTAGEN (R->A: Slightly…	CHAIN (SUMO-conjugating enzyme UBC9.)	MUTAGEN (D->A: Impairs catalytic activity.);MUTAGEN (D->S: No effect on catalytic activity.)
P02794	EKLMKLQNQR	YES	Ferritin heavy chain	FTH1;Ferritin heavy chain;Cell proliferation-inducing gene 15 protein;FRIH;	(Human)	11	HQSHEEREHA	EKLMKLQNQR	68	183			X					METAL (Iron 1.);METAL (Iron 2.);MOD_RES (N-acetylmethionine.);MOD_RES (N-acetylthreonine; in Ferritin heavy chain, N-terminally processed.);INIT_MET (Removed; alternate.)	CHAIN (Ferritin heavy chain.);CHAIN (Ferritin heavy chain, N-terminally processed.);DOMAIN (Ferritin-like diiron.)	METAL (Iron 2.);MOD_RES (Phosphoserine.)
P06865	ALLSAPWYLNR	YES	Beta-hexosaminidase subunit alpha	HEXA;Beta-hexosaminidase subunit alpha;Beta-N-acetylhexosaminidase subunit alpha Short=Hexosaminidase subunit A ;N-acetyl-beta-glucosaminidase subunit alpha;HEXA;	(Human)	15	LELVTKAGFR	ALLSAPWYLN	414	529								DISULFID ();SIGNAL ();CARBOHYD (N-linked (GlcNAc...).);ACT_SITE (Proton donor (By similarity).);MUTAGEN (N->Q: No change of the catalytic activity associated with the alpha-chain. No catalytic activity associated with the alpha-chain; when associated with Q-157 and Q-295.);MUTAGEN (N->Q: No change of the catalytic activity associated with the alpha-chain. No catalytic activity associated with the…	CHAIN (Beta-hexosaminidase subunit alpha.)	DISULFID ();REGION (Critical for hydrolyzis GM2 gangliosides.)	391	325
Q9HB71	ENVQVHFTER	YES	Calcyclin-binding protein	CACYBP;Calcyclin-binding protein;S100A6-binding protein ;Siah-interacting protein;CYBP;	(Human)	1	TLTGVHQVPT	ENVQVHFTER	102	228								MOD_RES (N-acetylalanine.);MOD_RES (N6-acetyllysine.);REGION (Interaction with SIAH1.);MUTAGEN (KRVR->AAVA: Abolishes interaction with SIAH1.);MUTAGEN (V->N: Abolishes interaction with SIAH1; when associated with N-66.);MUTAGEN (P->N: Abolishes interaction with SIAH1; when associated with N-64.);INIT_MET (Removed.)	CHAIN (Calcyclin-binding protein.);REGION (Interaction with SKP1.);DOMAIN (CS.)	MOD_RES (N6-acetyllysine.);REGION (Interaction with S100A6 (By similarity).);DOMAIN (SGS.)
Q8NEZ5	STFVLSNLAEVVER	YES	F-box only protein 22	FBXO22;F-box only protein 22;F-box protein FBX22p44;FBX22;	(Human)	15	ECRGSSVDPR	STFVLSNLAE	19	403								MOD_RES (N-acetylmethionine.)	CHAIN (F-box only protein 22.)	MOD_RES (N6-acetyllysine.);DOMAIN (F-box.)
P60660	EFKEAFQLFDR	YES	Myosin light polypeptide 6	MYL6;Myosin light polypeptide 6;17 kDa myosin light chain Short=LC17 ;Myosin light chain 3 Short=MLC-3 ;Myosin light chain alkali 3 Short=Myosin light chain A3 ;Smooth muscle and nonmuscle myosin light chain alkali 6;MYL6;	(Human)	12	MCDFTEDQTA	EFKEAFQLFD	11	151				MEP1B				MOD_RES (N-acetylcysteine.);INIT_MET (Removed.)	CHAIN (Myosin light polypeptide 6.);DOMAIN (EF-hand 1.)	MOD_RES (N6-acetyllysine.);DOMAIN (EF-hand 2.);DOMAIN (EF-hand 3.)
O14907	EDKTDKGIYVTR	YES	Tax1-binding protein 3	TAX1BP3;Tax1-binding protein 3;Glutaminase-interacting protein 3 ;Tax interaction protein 1 Short=TIP-1 ;Tax-interacting protein 1;TX1B3;	(Human)	17	DQDPSQNPFS	EDKTDKGIYV	48	124								MUTAGEN (K->A: Abolishes interaction with KCNJ4.);INIT_MET (Removed.);MOD_RES (N-acetylserine.)	CHAIN (Tax1-binding protein 3.);DOMAIN (PDZ.)	MUTAGEN (H->A: Abolishes interaction with KCNJ4.);MOD_RES (Phosphoserine.)
Q53FT3	MFGCLVAGR	YES	Protein Hikeshi	C11orf73;Protein Hikeshi;HIKES;	(Human)	11		MFGCLVAGRL	1	197	X	X			COFRADIC					CHAIN (Protein Hikeshi.)
Q8TEA8	EDTQKELEHMVR	YES	D-tyrosyl-tRNA(Tyr) deacylase 1	DTD1;D-tyrosyl-tRNA(Tyr) deacylase 1;DNA-unwinding element-binding protein B Short=DUE-B ;Histidyl-tRNA synthase-related;DTD1;	(Human)	20	GICVLLGISL	EDTQKELEHM	36	209								METAL (Magnesium; via carbonyl oxygen.);METAL (Magnesium.)	CHAIN (D-tyrosyl-tRNA(Tyr) deacylase 1.)	MOD_RES (Phosphoserine.);ACT_SITE (Nucleophile (By similarity).)
P62837	IHKELNDLAR	YES	Ubiquitin-conjugating enzyme E2 D2	UBE2D2;Ubiquitin-conjugating enzyme E2 D2;Ubiquitin carrier protein D2 ;Ubiquitin-conjugating enzyme E2(17)KB 2 ;Ubiquitin-conjugating enzyme E2-17 kDa 2 ;Ubiquitin-protein ligase D2 ;p53-regulated ubiquitin-conjugating enzyme 1;UB2D2;	(Human)	5	MALKR	IHKELNDLAR	6	147									CHAIN (Ubiquitin-conjugating enzyme E2 D2.)	MUTAGEN (K->A,E: Strongly reduced interaction with CNTO4.);MUTAGEN (C->A: Catalytically inactive. Loss of ability to promote FBXW2-mediated GCM1 ubiquitination. Inhibition of TNF-alpha- induced degradation of NFKBIA.);ACT_SITE (Glycyl thioester intermediate (By similarity).)
Q7Z4H3	EEEAMKQITQLLPEDLR	YES	HD domain-containing protein 2	HDDC2;HD domain-containing protein 2;Hepatitis C virus NS5A-transactivated protein 2 Short=HCV NS5A-transactivated protein 2;HDDC2;	(Human)	6	NIPKEEKHRR	EEEAMKQITQ	102	204								MOD_RES (N-acetylalanine.);INIT_MET (Removed.)	CHAIN (HD domain-containing protein 2.);DOMAIN (HD.)
Q16643	ETQEPSPILDSEETR	YES	Drebrin	DBN1;Drebrin;Developmentally-regulated brain protein;DREB;	(Human)	5	PLPPPPPPAQ	ETQEPSPILD	376	649								MOD_RES (N-acetylalanine.);MOD_RES (Phosphoserine.);MOD_RES (Phosphothreonine.);DOMAIN (ADF-H.);INIT_MET (Removed.)	CHAIN (Drebrin.)
P35241	SEEERVTETQKNER	YES	Radixin	RDX;Radixin;RADI;	(Human)	11	LSNEGVMNHR	SEEERVTETQ	510	583								MOD_RES (N6-succinyllysine (By similarity).);COMPBIAS (Poly-Pro.);REGION (Phosphatidylinositol binding (By similarity).);DOMAIN (FERM.);BINDING (Phosphatidylinositol (By similarity).)	COMPBIAS (Glu-rich.);CHAIN (Radixin.)	MOD_RES (Phosphothreonine; by ROCK2 (By similarity).)
Q01130	VGDVYIPR	YES	Serine/arginine-rich splicing factor 2	SRSF2;Serine/arginine-rich splicing factor 2;Protein PR264 ;Splicing component, 35 kDa ;Splicing factor SC35 Short=SC-35 ;Splicing factor, arginine/serine-rich 2;SRSF2;	(Human)	17	LRRVFEKYGR	VGDVYIPRDR	40	221								MOD_RES (N-acetylserine.);MOD_RES (Phosphoserine.);MOD_RES (Phosphothreonine.);INIT_MET (Removed.)	DOMAIN (RRM.);CHAIN (Serine/arginine-rich splicing factor 2.)	MOD_RES (N6-acetyllysine.);MOD_RES (Phosphoserine.);COMPBIAS (Gly-rich (hinge region).);COMPBIAS (Arg/Ser-rich (RS domain).)
P17066	STLEPVEKALR	YES	Heat shock 70 kDa protein 6	HSPA6;Heat shock 70 kDa protein 6;Heat shock 70 kDa protein B';HSP76;	(Human)	1	FEELCSDLFR	STLEPVEKAL	314	643								NP_BIND (ATP.);BINDING (ATP.)	CHAIN (Heat shock 70 kDa protein 6.)	MOD_RES (N6,N6,N6-trimethyllysine; by METTL21A; in vitro.);NP_BIND (ATP.);MUTAGEN (K->R: Complete loss of in vitro methylation by METTL21A.)
Q86UP2	DNADSSPVVDKR	YES	Kinectin	KTN1;Kinectin;CG-1 antigen ;Kinesin receptor;KTN1;	(Human)	14	IHATTYIPLM	DNADSSPVVD	238	1357					Subtiligase Based Positive Selection;unknown			TOPO_DOM (Cytoplasmic (Potential).);CARBOHYD (N-linked (GlcNAc...) (Potential).);TRANSMEM (Helical; Signal-anchor for type II membrane protein; (Potential).);MOD_RES (Phosphoserine.);MOD_RES (Phosphothreonine.)	TOPO_DOM (Lumenal (Potential).);CHAIN (Kinectin.)	CARBOHYD (N-linked (GlcNAc...) (Potential).);COILED (Potential.);CROSSLNK (Glycyl lysine isopeptide (Lys-Gly) (interchain with G-Cter in ubiquitin).)			208
P21741	ENWGACDGGTGTKVR	YES	Midkine	MDK;Midkine;Amphiregulin-associated protein Short=ARAP ;Midgestation and kidney protein ;Neurite outgrowth-promoting factor 2 ;Neurite outgrowth-promoting protein;MK;	(Human)	11	EFGADCKYKF	ENWGACDGGT	89	143								DISULFID ();SIGNAL ()	DISULFID ();CHAIN (Midkine.)	DISULFID ()	68
P50897	ESSHICDFIR	YES	Palmitoyl-protein thioesterase 1	PPT1;Palmitoyl-protein thioesterase 1;Palmitoyl-protein hydrolase 1;PPT1;	(Human)	1	GVFGLPRCPG	ESSHICDFIR	155	306								ACT_SITE (By similarity.);DISULFID ();SIGNAL (By similarity.)	DISULFID ();CHAIN (Palmitoyl-protein thioesterase 1.)	ACT_SITE (By similarity.);CARBOHYD (N-linked (GlcNAc...).)	127
Q14574	VLNDGSVYTAR	YES	Desmocollin-3	DSC3;Desmocollin-3;Cadherin family member 3 ;Desmocollin-4 ;HT-CP;DSC3;	(Human)	18	LIRSSDPDFR	VLNDGSVYTA	73	896								SIGNAL (Potential.)	PROPEP (Potential.)	TOPO_DOM (Extracellular (Potential).);TOPO_DOM (Cytoplasmic (Potential).);CHAIN (Desmocollin-3.);CARBOHYD (N-linked (GlcNAc...) (Potential).);TRANSMEM (Helical; (Potential).);DOMAIN (Cadherin 1.);DOMAIN (Cadherin 2.);DOMAIN (Cadherin 3.);DOMAIN (Cadherin 4.);DOMAIN (Cadherin 5.)	45	-63	-639
P31948	EKILKEQER	YES	Stress-induced-phosphoprotein 1	STIP1;Stress-induced-phosphoprotein 1;Hsc70/Hsp90-organizing protein Short=Hop ;Renal carcinoma antigen NY-REN-11 ;Transformation-sensitive protein IEF SSP 3521;STIP1;	(Human)	11	PDVLKKCQQA	EKILKEQERL	343	543								MOD_RES (N-acetylmethionine.);MOD_RES (N6-acetyllysine.);MOD_RES (Phosphoserine.);DOMAIN (STI1 1.);MOTIF (Bipartite nuclear localization signal (Potential).);REPEAT (TPR 1.);REPEAT (TPR 2.);REPEAT (TPR 3.);REPEAT (TPR 4.);REPEAT (TPR 5.);REPEAT (TPR 6.)	CHAIN (Stress-induced-phosphoprotein 1.)	MOD_RES (N6-acetyllysine.);MOD_RES (Phosphotyrosine.);MOD_RES (Phosphoserine.);DOMAIN (STI1 2.);REPEAT (TPR 7.);REPEAT (TPR 8.);REPEAT (TPR 9.)
Q06830	EVCPAGWKPGSDTIKPDVQKSKEYFSKQK	YES	Peroxiredoxin-1	PRDX1;Peroxiredoxin-1;Natural killer cell-enhancing factor A Short=NKEF-A ;Proliferation-associated gene protein Short=PAG ;Thioredoxin peroxidase 2 ;Thioredoxin-dependent peroxide reductase 2;PRDX1;	(Human)	1	QAFQFTDKHG	EVCPAGWKPG	171	199								MOD_RES (N-acetylserine.);MOD_RES (N6-acetyllysine.);MOD_RES (N6-acetyllysine; alternate.);MOD_RES (N6-succinyllysine; alternate (By similarity).);MOD_RES (Phosphothreonine; by CDK1.);MOD_RES (N6-acetyllysine (By similarity).);INIT_MET (Removed.);ACT_SITE (Cysteine sulfenic acid (-SOH) intermediate.);DISULFID (Interchain (with C-173); in linked form.);DOMAIN (Thioredoxin.);MUTAGEN (T->A: Abolishe…	CHAIN (Peroxiredoxin-1.)	DISULFID (Interchain (with C-52); in linked form.)
P52597	EKALGKHKER	YES	Heterogeneous nuclear ribonucleoprotein F	HNRNPF;Heterogeneous nuclear ribonucleoprotein F;Nucleolin-like protein mcs94-1;HNRPF;	(Human)	10	FVQFASQELA	EKALGKHKER	166	415								MOD_RES (N-acetylmethionine; in Heterogeneous nuclear ribonucleoprotein F; alternate.);MOD_RES (N-acetylmethionine; in Heterogeneous nuclear ribonucleoprotein F, N-terminally processed.);MOD_RES (Phosphoserine.);REGION (Interaction with RNA.);CROSSLNK (Glycyl lysine isopeptide (Lys-Gly) (interchain with G-Cter in SUMO).);DOMAIN (RRM 1.);MUTAGEN (W->A: Loss of RNA-binding.);MUTAGEN (E->A: Loss of …	CHAIN (Heterogeneous nuclear ribonucleoprotein F.);CHAIN (Heterogeneous nuclear ribonucleoprotein F, N-terminally processed.);DOMAIN (RRM 2.)	MOD_RES (Phosphoserine.);MOD_RES (N6-acetyllysine.);REGION (Interaction with RNA.);DOMAIN (RRM 3.);MUTAGEN (K->A: Minimal effect on affinity for RNA oligonucleotide.);MUTAGEN (H->A: Little disruption of binding RNA.);MUTAGEN (R->A: Decreases affinity for RNA oligonucleotide 100-fold.);MUTAGEN (Y->A: Decreases affinity for RNA oligonucleotide 10-fold. Abrogates RNA- binding; when associated with A…
P09429	EEHKKKHPDASVNFS	YES	High mobility group protein B1	HMGB1;High mobility group protein B1;High mobility group protein 1 Short=HMG-1;HMGB1;	(Human)	13	SYAFFVQTCR	EEHKKKHPDA	25	215								INIT_MET (Removed (By similarity).)	CHAIN (High mobility group protein B1.);DNA_BIND (HMG box 1.)	COMPBIAS (Asp/Glu-rich (acidic).);DNA_BIND (HMG box 2.);MOD_RES (N6-acetyllysine.);MOD_RES (Phosphoserine.);MOD_RES (N6-acetyllysine (By similarity).);CROSSLNK (Glycyl lysine isopeptide (Lys-Gly) (interchain with G-Cter in ubiquitin).)
Q99538	EDVTPQNFLAVLR	YES	Legumain	LGMN;Legumain;Asparaginyl endopeptidase ;Protease, cysteine 1;LGMN;C13.004	(Human)	14	YQGVPKDYTG	EDVTPQNFLA	106	433								SIGNAL ();CARBOHYD (N-linked (GlcNAc...).)	CHAIN (Legumain.)	DISULFID (By similarity.);CARBOHYD (N-linked (GlcNAc...).);ACT_SITE (Probable.);ACT_SITE (Nucleophile.);MUTAGEN (E->K: Increases catalytic activity at pH 5.5.);MUTAGEN (N->D,Q,S: Loss of autoactivation.);SITE (Cleavage; by autolysis.);PROPEP ()	88	-328
O00233	SDVDLYQVR	YES	26S proteasome non-ATPase regulatory subunit 9	PSMD9;26S proteasome non-ATPase regulatory subunit 9;26S proteasome regulatory subunit p27;PSMD9;	(Human)	12	PLVDCEGYPR	SDVDLYQVRT	65	223					N-TAILS				CHAIN (26S proteasome non-ATPase regulatory subunit 9.)	MOD_RES (Phosphoserine (By similarity).);DOMAIN (PDZ.)
Q9BX67	VNLKSSNR	YES	Junctional adhesion molecule C	JAM3;Junctional adhesion molecule C;JAM-2 ;Junctional adhesion molecule 3 Short=JAM-3;JAM3;I43.001	(Human)	11	LLFRGCLIGA	VNLKSSNRTP	32	310	X	X						SIGNAL ()		DISULFID (Potential.);TOPO_DOM (Extracellular (Potential).);TOPO_DOM (Cytoplasmic (Potential).);CHAIN (Junctional adhesion molecule C.);CARBOHYD (N-linked (GlcNAc...) (Potential).);CARBOHYD (N-linked (GlcNAc...).);CARBOHYD (N-linked (GlcNAc...); atypical.);TRANSMEM (Helical; (Potential).);DOMAIN (Ig-like V-type.);DOMAIN (Ig-like C2-type.)	0		-231
Q16643	ESEVEEAAAIIAQRPDNPR	YES	Drebrin	DBN1;Drebrin;Developmentally-regulated brain protein;DREB;	(Human)	5	EEEETHMKKS	ESEVEEAAAI	273	649								MOD_RES (N-acetylalanine.);MOD_RES (Phosphoserine.);DOMAIN (ADF-H.);INIT_MET (Removed.)	CHAIN (Drebrin.)	MOD_RES (Phosphothreonine.);MOD_RES (Phosphoserine.)
Q9UBR2	EFKECHAIR	YES	Cathepsin Z	CTSZ;Cathepsin Z;Cathepsin P ;Cathepsin X;CATZ;C01.013	(Human)	20	DKFNQCGTCN	EFKECHAIRN	175	303								DISULFID ();ACT_SITE ();SIGNAL (Potential.);PROPEP (Activation peptide.)	DISULFID ();CHAIN (Cathepsin Z.)	DISULFID ();ACT_SITE ();CARBOHYD (N-linked (GlcNAc...).);CARBOHYD (N-linked (GlcNAc...) (Potential).)	151	113
P01034	LVGGPMDASVEEEGVR	YES	Cystatin-C	CST3;Cystatin-C;Cystatin-3 ;Gamma-trace ;Neuroendocrine basic polypeptide ;Post-gamma-globulin;CYTC;I25.004	(Human)	20	AGSSPGKPPR	LVGGPMDASV	35	146				MMP2;MEP1A;MEP1B;ELNE;CATL1	unknown		MMP2->PLG->MEP1A->CST3; MMP2->PLG->MEP1A->CST3; MMP2->PLG->MEP1A->CST3; MMP2->PLG->MEP1A->CST3; MMP2->PLG->MEP1A->CST3; MMP2->PLG->MEP1A->CST3; MMP2->A2M->CTSL->CST3; MMP2->A2M->ELANE->CST3; MMP2->A2M->CTSL->CST3; MMP2->A2M->ELANE->CST3; MMP2->CST3->CTSL->CST3; MMP2->CST3->MEP1A->CST3; MMP2->CST3->MEP1A->CST3; MMP2->CST3->MEP1A->CST3; MMP2->CTSC->ELANE->CST3; MMP2->CTSL->CST3; MMP2->CTSL->CTSL->C…	SIGNAL ();MUTAGEN (A->S: Shows a dual distribution to the Golgi apparatus and to the mitochondria.)	CHAIN (Cystatin-C.)	DISULFID ();MOTIF (Secondary area of contact.);SITE (Reactive site.)	8
Q13263	EPLCETCVEAHQR	YES	Transcription intermediary factor 1-beta	TRIM28;Transcription intermediary factor 1-beta;E3 SUMO-protein ligase TRIM28 EC=6.3.2.- ;KRAB-associated protein 1 Short=KAP-1 ;KRAB-interacting protein 1 Short=KRIP-1 ;Nuclear corepressor KAP-1 ;RING finger protein 96 ;Tripartite motif-containing protein 28;TIF1B;	(Human)	19	PATSYCVECS	EPLCETCVEA	171	835								MOD_RES (N-acetylalanine.);MOD_RES (Phosphoserine.);INIT_MET (Removed.);COMPBIAS (Ala-rich.);MUTAGEN (C->A: Reduces nuclear localization activity of ZNF268; when associated with A-68.);MUTAGEN (C->A: Reduces nuclear localization activity of ZNF268; when associated with A-65.);ZN_FING (RING-type.)	REGION (RBCC domain.);CHAIN (Transcription intermediary factor 1-beta.);ZN_FING (B box-type 1; atypical.)	MOD_RES (N6-acetyllysine (By similarity).);MOD_RES (N6-acetyllysine.);MOD_RES (Phosphoserine.);MOD_RES (Citrulline (By similarity).);MOD_RES (Phosphothreonine.);MOD_RES (N6-acetyllysine; alternate (By similarity).);MOD_RES (Phosphoserine; by ATM and ATR and dsDNA kinase.);COMPBIAS (Poly-Ala.);REGION (Leucine zipper alpha helical coiled-coil region.);REGION (Interaction with MAGEC2.);REGION (Invol…
P55001	TVCAHEELLR	YES	Microfibrillar-associated protein 2	MFAP2;Microfibrillar-associated protein 2;Microfibril-associated glycoprotein 1 Short=MAGP Short=MAGP-1;MFAP2;	(Human)	1	YVINKEICVR	TVCAHEELLR	140	183								COMPBIAS (Gln/Glu-rich.);SIGNAL (Or 19 (Potential).);MOD_RES (Pyrrolidone carboxylic acid (By similarity).);MOD_RES (Sulfotyrosine (Probable).)	CHAIN (Microfibrillar-associated protein 2.)	DISULFID (By similarity.);DOMAIN (ShKT.)	122
P52597	ELAEKALGKHKER	YES	Heterogeneous nuclear ribonucleoprotein F	HNRNPF;Heterogeneous nuclear ribonucleoprotein F;Nucleolin-like protein mcs94-1;HNRPF;	(Human)	10	GEAFVQFASQ	ELAEKALGKH	163	415								MOD_RES (N-acetylmethionine; in Heterogeneous nuclear ribonucleoprotein F; alternate.);MOD_RES (N-acetylmethionine; in Heterogeneous nuclear ribonucleoprotein F, N-terminally processed.);MOD_RES (Phosphoserine.);REGION (Interaction with RNA.);CROSSLNK (Glycyl lysine isopeptide (Lys-Gly) (interchain with G-Cter in SUMO).);DOMAIN (RRM 1.);MUTAGEN (W->A: Loss of RNA-binding.);MUTAGEN (E->A: Loss of …	CHAIN (Heterogeneous nuclear ribonucleoprotein F.);CHAIN (Heterogeneous nuclear ribonucleoprotein F, N-terminally processed.);DOMAIN (RRM 2.)	MOD_RES (Phosphoserine.);MOD_RES (N6-acetyllysine.);REGION (Interaction with RNA.);DOMAIN (RRM 3.);MUTAGEN (K->A: Minimal effect on affinity for RNA oligonucleotide.);MUTAGEN (H->A: Little disruption of binding RNA.);MUTAGEN (R->A: Decreases affinity for RNA oligonucleotide 100-fold.);MUTAGEN (Y->A: Decreases affinity for RNA oligonucleotide 10-fold. Abrogates RNA- binding; when associated with A…
P37108	EQFLTELTR	YES	Signal recognition particle 14 kDa protein	SRP14;Signal recognition particle 14 kDa protein;18 kDa Alu RNA-binding protein;SRP14;	(Human)	15	MVLLES	EQFLTELTRL	7	136								INIT_MET (Removed.)	CHAIN (Signal recognition particle 14 kDa protein.)	COMPBIAS (Ala/Thr-rich.)
P25398	EWVGLCKIDR	YES	40S ribosomal protein S12	RPS12;40S ribosomal protein S12;RS12;	(Human)	6	IKVDDNKKLG	EWVGLCKIDR	87	132								MOD_RES (N-acetylalanine.);INIT_MET (Removed.)	CHAIN (40S ribosomal protein S12.)	MOD_RES (N6-succinyllysine (By similarity).)
P12277	KVLTPELYAELR	YES	Creatine kinase B-type	CKB;Creatine kinase B-type;B-CK ;Creatine kinase B chain;KCRB;	(Human)	14	DLSAHNNHMA	KVLTPELYAE	32	381			X					MOD_RES (Phosphoserine.);INIT_MET (Removed.)	CHAIN (Creatine kinase B-type.);DOMAIN (Phosphagen kinase N-terminal.)	MOD_RES (Phosphothreonine.);MOD_RES (Phosphotyrosine (By similarity).);MOD_RES (Phosphoserine.);MOD_RES (Nitrated tyrosine (By similarity).);NP_BIND (ATP.);BINDING (Substrate; via amide nitrogen.);BINDING (ATP.);BINDING (Substrate.);BINDING (ATP (By similarity).);DOMAIN (Phosphagen kinase C-terminal.);MUTAGEN (C->S,Y: Complete loss of activity.);MUTAGEN (R->H,L,Q: Complete loss of activity.);MUTA…
P00918	HKDFPIAKGER	YES	Carbonic anhydrase 2	CA2;Carbonic anhydrase 2;Carbonate dehydratase II ;Carbonic anhydrase C Short=CAC ;Carbonic anhydrase II Short=CA-II;CAH2;	(Human)	8	YGKHNGPEHW	HKDFPIAKGE	17	260								INIT_MET (Removed.);MOD_RES (N-acetylserine.);MUTAGEN (W->A: Impaired activity, not rescued by 4-methylimidazole (4-MI); when associated with W-64.);MUTAGEN (Y->F: Enhanced activity.);MUTAGEN (Y->H: Reduced proton transfer rate.)	CHAIN (Carbonic anhydrase 2.)	ACT_SITE ();MUTAGEN (N->A: Reduced activity.);MUTAGEN (N->D: Strongly reduced activity.);MUTAGEN (N->H: Reduced proton transfer; when associated with A-64.);MUTAGEN (N->L: Reduced activity.);MUTAGEN (N->T: Reduced activity.);MUTAGEN (N->V: Reduced activity.);MUTAGEN (H->A: Reduced CO(2) hydrase activity, rescued by 4-methylimidazole (4-MI). Reduced proton transfer; when associated with H-62. Enha…
Q02809	SEDYVDIVQGR	YES	Procollagen-lysine,2-oxoglutarate 5-dioxygenase 1	PLOD1;Procollagen-lysine,2-oxoglutarate 5-dioxygenase 1;Lysyl hydroxylase 1 Short=LH1;PLOD1;	(Human)	1	ALSADGYYAR	SEDYVDIVQG	431	727								SIGNAL ();MUTAGEN (C->A: Loss of activity.);CARBOHYD (N-linked (GlcNAc...) (Potential).);CARBOHYD (N-linked (GlcNAc...) (Probable).)	CHAIN (Procollagen-lysine,2-oxoglutarate 5- dioxygenase 1.)	ACT_SITE (Potential.);METAL (Iron.);DOMAIN (Fe2OG dioxygenase.);CARBOHYD (N-linked (GlcNAc...) (Probable).);CARBOHYD (N-linked (GlcNAc...) (Potential).)	412
Q13442	EEIEKQKAKER	YES	28 kDa heat- and acid-stable phosphoprotein	PDAP1;28 kDa heat- and acid-stable phosphoprotein;PDGF-associated protein Short=PAP ;PDGFA-associated protein 1 Short=PAP1;HAP28;	(Human)	7	GPKELSRRER	EEIEKQKAKE	113	181								MOD_RES (Phosphoserine.);MOD_RES (Phosphotyrosine (By similarity).)	CHAIN (28 kDa heat- and acid-stable phosphoprotein.)	MOD_RES (N6-acetyllysine.);MOD_RES (N6-acetyllysine (By similarity).);MOD_RES (Phosphoserine.)
P62424	KAAGKGDVPTKRPPVLR	YES	60S ribosomal protein L7a	RPL7A;60S ribosomal protein L7a;PLA-X polypeptide ;Surfeit locus protein 3;RL7A;	(Human)	9	KQRLLARAEK	KAAGKGDVPT	121	266					Subtiligase Based Positive Selection			MOD_RES (N6-acetyllysine.);INIT_MET (Removed (By similarity).)	CHAIN (60S ribosomal protein L7a.)	MOD_RES (N6-acetyllysine.)
Q15181	ESPFKCDPDAAR	YES	Inorganic pyrophosphatase	PPA1;Inorganic pyrophosphatase;Pyrophosphate phospho-hydrolase Short=PPase;IPYR;	(Human)	10	GISCMNTTLS	ESPFKCDPDA	249	289								METAL (Magnesium 1 (By similarity).);METAL (Magnesium 2 (By similarity).);MOD_RES (N-acetylserine.);MOD_RES (N6-acetyllysine.);INIT_MET (Removed.)	CHAIN (Inorganic pyrophosphatase.)	MOD_RES (Phosphoserine.)
P43121	ETTNDNGVLVLEPAR	YES	Cell surface glycoprotein MUC18	MCAM;Cell surface glycoprotein MUC18;Cell surface glycoprotein P1H12 ;Melanoma cell adhesion molecule ;Melanoma-associated antigen A32 ;Melanoma-associated antigen MUC18 ;S-endo 1 endothelial-associated antigen ;MUC18;	(Human)	11	QNPSTREAEE	ETTNDNGVLV	297	646								DISULFID (Probable.);SIGNAL ();CARBOHYD (N-linked (GlcNAc...) (Potential).);DOMAIN (Ig-like V-type 1.);DOMAIN (Ig-like V-type 2.)	DISULFID (Probable.);TOPO_DOM (Extracellular (Potential).);CHAIN (Cell surface glycoprotein MUC18.);DOMAIN (Ig-like C2-type 1.)	DISULFID (Probable.);TOPO_DOM (Cytoplasmic (Potential).);CARBOHYD (N-linked (GlcNAc...) (Potential).);CARBOHYD (N-linked (GlcNAc...).);TRANSMEM (Helical; (Potential).);MOD_RES (Phosphoserine.);DOMAIN (Ig-like C2-type 2.);DOMAIN (Ig-like C2-type 3.)	273		-287
O75326	SEGLLACGTNAR	YES	Semaphorin-7A	SEMA7A;Semaphorin-7A;CDw108 ;JMH blood group antigen ;John-Milton-Hargen human blood group Ag ;Semaphorin-K1 Short=Sema K1 ;Semaphorin-L Short=Sema L ;SEM7A;	(Human)	15	ENYITLLERR	SEGLLACGTN	137	666								DISULFID ();SIGNAL (Potential.);CARBOHYD (N-linked (GlcNAc...).)	DOMAIN (Sema.);CHAIN (Semaphorin-7A.)	PROPEP (Removed in mature form (Potential).);DISULFID ();REGION (Interaction with integrins.);DOMAIN (Ig-like C2-type.);MOTIF (Cell attachment site (Potential).);MUTAGEN (R->K: Abolishes ITGB1-dependent enhancement of axon growth; when associated with E-269.);MUTAGEN (D->E: Abolishes ITGB1-dependent enhancement of axon growth; when associated with K-267.);CARBOHYD (N-linked (GlcNAc...).);CARBOHYD…	92	-530
Q99497	EILKEQENR	YES	Protein DJ-1	PARK7;Protein DJ-1;Oncogene DJ1 ;Parkinson disease protein 7;PARK7;C56.002	(Human)	1	QNLSESAAVK	EILKEQENRK	90	189								MOD_RES (Phosphotyrosine.);CHAIN (Protein DJ-1.);MUTAGEN (C->A: Reduced localization in lipid rafts; when associated with A-106.);MUTAGEN (C->A: Reduces protein stability. No effect on oxidation.);MUTAGEN (C->S: No effect on mitochondrial translocation.);MUTAGEN (V->A: Disrupts dimer formation and strongly reduces ability to eliminate hydrogen peroxide.);MUTAGEN (C->A: Strongly reduces chaperone …	PROPEP (Removed in mature form.)	MOD_RES (Cysteine sulfinic acid (-SO2H); alternate.);MOD_RES (N6-acetyllysine (By similarity).);MOD_RES (N6-succinyllysine (By similarity).);ACT_SITE (Probable.);MUTAGEN (C->A: Abolishes oxidation, association with mitochondria and protease activity. No effect on chaperone activity. Reduced binding to OTUD7B.);MUTAGEN (C->A: Reduced localization in lipid rafts; when associated with A-46.);MUTAGEN…		-100
P60900	EIPVDMLCKR	YES	Proteasome subunit alpha type-6	PSMA6;Proteasome subunit alpha type-6;27 kDa prosomal protein Short=PROS-27 Short=p27K ;Macropain iota chain ;Multicatalytic endopeptidase complex iota chain ;Proteasome iota chain;PSA6;T01.971	(Human)	14	AANWKYKYGY	EIPVDMLCKR	108	246								MOD_RES (N6-acetyllysine.);CARBOHYD (O-linked (GlcNAc) (By similarity).);CROSSLNK (Glycyl lysine isopeptide (Lys-Gly) (interchain with G-Cter in ubiquitin).)	CHAIN (Proteasome subunit alpha type-6.)	MOD_RES (Phosphotyrosine (By similarity).)
P34932	ELKNLGQPIKIR	YES	Heat shock 70 kDa protein 4	HSPA4;Heat shock 70 kDa protein 4;HSP70RY ;Heat shock 70-related protein APG-2;HSP74;	(Human)	5	PKQVYVDKLA	ELKNLGQPIK	677	840								MOD_RES (N6-acetyllysine (By similarity).);MOD_RES (Phosphoserine.);MOD_RES (Phosphotyrosine.);MOD_RES (N6-acetyllysine.);MOD_RES (Phosphothreonine.);MOD_RES (Phosphotyrosine (By similarity).)	CHAIN (Heat shock 70 kDa protein 4.)	MOD_RES (N6-acetyllysine.)
P48739	EDETQKELETMR	YES	Phosphatidylinositol transfer protein beta isoform	PITPNB;Phosphatidylinositol transfer protein beta isoform;PIPNB;	(Human)	22	DLTMEDIRRM	EDETQKELET	247	271								MOD_RES (N6-acetyllysine.);INIT_MET (Removed (By similarity).)	CHAIN (Phosphatidylinositol transfer protein beta isoform.)	MOD_RES (Phosphoserine (By similarity).)
P13693	EVEGKMVSR	YES	Translationally-controlled tumor protein	TPT1;Translationally-controlled tumor protein;Fortilin ;Histamine-releasing factor Short=HRF ;p23;TCTP;	(Human)	13	IREIADGLCL	EVEGKMVSRT	30	172				GRAB			MMP2->CTSC->GZMB->TPT1; MMP2->CTSC->GZMB->TPT1; MMP2->CTSC->GZMB->TPT1		CHAIN (Translationally-controlled tumor protein.)	MOD_RES (Phosphoserine; by PLK1.);MOD_RES (Phosphoserine.)
P25398	EAAKALDKR	YES	40S ribosomal protein S12	RPS12;40S ribosomal protein S12;RS12;	(Human)	6	IHDGLARGIR	EAAKALDKRQ	37	132								MOD_RES (N-acetylalanine.);INIT_MET (Removed.)	CHAIN (40S ribosomal protein S12.)	MOD_RES (N6-succinyllysine (By similarity).)
O75882	ECQLCEVENR	YES	Attractin	ATRN;Attractin;DPPT-L ;Mahogany homolog;ATRN;	(Human)	20	FCTTKGVKGD	ECQLCEVENR	1136	1429								DISULFID (By similarity.);COMPBIAS (Leu-rich.);REPEAT (Kelch 1.);REPEAT (Kelch 2.);REPEAT (Kelch 3.);REPEAT (Kelch 4.);REPEAT (Kelch 5.);REPEAT (Kelch 6.);DOMAIN (EGF-like.);DOMAIN (CUB.);DOMAIN (PSI 1.);DOMAIN (PSI 2.);DOMAIN (C-type lectin.);DOMAIN (PSI 3.);DOMAIN (PSI 4.);DOMAIN (Laminin EGF-like 1.);SIGNAL (Potential.);CARBOHYD (N-linked (GlcNAc...) (Potential).);CARBOHYD (N-linked (GlcNAc...…	DISULFID (By similarity.);TOPO_DOM (Extracellular (Potential).);DOMAIN (Laminin EGF-like 2.);CHAIN (Attractin.)	DISULFID (By similarity.);TOPO_DOM (Cytoplasmic (Potential).);TRANSMEM (Helical; (Potential).);CARBOHYD (N-linked (GlcNAc...).);CARBOHYD (N-linked (GlcNAc...) (Potential).)	1107	1052	-165
P10586	EGPFQEVDGVATTR	YES	Receptor-type tyrosine-protein phosphatase F	PTPRF;Receptor-type tyrosine-protein phosphatase F;Leukocyte common antigen related Short=LAR;PTPRF;	(Human)	1	YGIQYRAAGT	EGPFQEVDGV	360	1907								DISULFID (By similarity.);REGION (Heparin-binding (By similarity).);SIGNAL (Potential.);DOMAIN (Ig-like C2-type 1.);DOMAIN (Ig-like C2-type 2.);DOMAIN (Ig-like C2-type 3.);CARBOHYD (N-linked (GlcNAc...) (Potential).)	DOMAIN (Fibronectin type-III 1.);CHAIN (Receptor-type tyrosine-protein phosphatase F.);TOPO_DOM (Extracellular (Potential).)	ACT_SITE (Phosphocysteine intermediate (Probable).);ACT_SITE (Phosphocysteine intermediate (By similarity).);REGION (Substrate binding (By similarity).);DOMAIN (Fibronectin type-III 2.);DOMAIN (Fibronectin type-III 3.);DOMAIN (Fibronectin type-III 4.);DOMAIN (Fibronectin type-III 5.);DOMAIN (Fibronectin type-III 6.);DOMAIN (Fibronectin type-III 7.);DOMAIN (Fibronectin type-III 8.);DOMAIN (Tyrosin…	330		-925
Q08380	STHTLDLSR	YES	Galectin-3-binding protein	LGALS3BP;Galectin-3-binding protein;Basement membrane autoantigen p105 ;Lectin galactoside-binding soluble 3-binding protein ;Mac-2-binding protein Short=MAC2BP Short=Mac-2 BP ;Tumor-associated antigen 90K;LG3BP;	(Human)	17	AGVVCTNETR	STHTLDLSRE	129	585								DISULFID ();SIGNAL ();CARBOHYD (N-linked (GlcNAc...) (complex).);CARBOHYD (N-linked (GlcNAc...).);DOMAIN (SRCR.)	CHAIN (Galectin-3-binding protein.)	CARBOHYD (N-linked (GlcNAc...).);CARBOHYD (N-linked (GlcNAc...) (complex).);DOMAIN (BTB.);DOMAIN (BACK.)	110
E9PAV3	EPVSKAKQSR	YES	Nascent polypeptide-associated complex subunit alpha, muscle-specific form	NACA;Nascent polypeptide-associated complex subunit alpha, muscle-specific form;Alpha-NAC, muscle-specific form Short=skNAC;NACAM;	(Human)	12	QLAAAAEIDE	EPVSKAKQSR	1925	2078								COMPBIAS (Pro-rich.);MOTIF (PXLXP (By similarity).);MOD_RES (Phosphoserine; by ILK1 (By similarity).)	CHAIN (Nascent polypeptide-associated complex subunit alpha, muscle-specific form.)	MOD_RES (N6-acetyllysine.);MOD_RES (Phosphothreonine; by GSK3-beta (By similarity).);MOD_RES (Phosphothreonine.);MOD_RES (Phosphoserine.);REGION (Required for DNA-binding (By similarity).);DOMAIN (NAC-A/B.);DOMAIN (UBA.)
P08174	DCGLPPDVPNAQPALEGR	YES	Complement decay-accelerating factor	CD55;Complement decay-accelerating factor;DAF;	(Human)	1	VLLCLPAVWG	DCGLPPDVPN	35	381	X	X			N-TAILS			SIGNAL ()		DISULFID ();COMPBIAS (Ser/Thr-rich.);CHAIN (Complement decay-accelerating factor.);CARBOHYD (N-linked (GlcNAc...).);LIPID (GPI-anchor amidated serine.);DOMAIN (Sushi 1.);DOMAIN (Sushi 2.);DOMAIN (Sushi 3.);DOMAIN (Sushi 4.);PROPEP (Removed in mature form.)	0	-347
P43121	EAEEETTNDNGVLVLEPAR	YES	Cell surface glycoprotein MUC18	MCAM;Cell surface glycoprotein MUC18;Cell surface glycoprotein P1H12 ;Melanoma cell adhesion molecule ;Melanoma-associated antigen A32 ;Melanoma-associated antigen MUC18 ;S-endo 1 endothelial-associated antigen ;MUC18;	(Human)	11	SISKQNPSTR	EAEEETTNDN	293	646								DISULFID (Probable.);SIGNAL ();CARBOHYD (N-linked (GlcNAc...) (Potential).);DOMAIN (Ig-like V-type 1.);DOMAIN (Ig-like V-type 2.)	DISULFID (Probable.);TOPO_DOM (Extracellular (Potential).);CHAIN (Cell surface glycoprotein MUC18.);DOMAIN (Ig-like C2-type 1.)	DISULFID (Probable.);TOPO_DOM (Cytoplasmic (Potential).);CARBOHYD (N-linked (GlcNAc...) (Potential).);CARBOHYD (N-linked (GlcNAc...).);TRANSMEM (Helical; (Potential).);MOD_RES (Phosphoserine.);DOMAIN (Ig-like C2-type 2.);DOMAIN (Ig-like C2-type 3.)	269		-291
Q13263	EALELLEHCGVCR	YES	Transcription intermediary factor 1-beta	TRIM28;Transcription intermediary factor 1-beta;E3 SUMO-protein ligase TRIM28 EC=6.3.2.- ;KRAB-associated protein 1 Short=KAP-1 ;KRAB-interacting protein 1 Short=KRIP-1 ;Nuclear corepressor KAP-1 ;RING finger protein 96 ;Tripartite motif-containing protein 28;TIF1B;	(Human)	19	AASSPAGGGA	EALELLEHCG	57	835				MEP1A;MEP1B			MMP2->PLG->MEP1A->TRIM28; MMP2->PLG->MEP1A->TRIM28; MMP2->CST3->MEP1A->TRIM28; MMP2->CST3->MEP1A->TRIM28	MOD_RES (N-acetylalanine.);MOD_RES (Phosphoserine.);INIT_MET (Removed.)	COMPBIAS (Ala-rich.);CHAIN (Transcription intermediary factor 1-beta.)	MOD_RES (N6-acetyllysine (By similarity).);MOD_RES (N6-acetyllysine.);MOD_RES (Phosphoserine.);MOD_RES (Citrulline (By similarity).);MOD_RES (Phosphothreonine.);MOD_RES (N6-acetyllysine; alternate (By similarity).);MOD_RES (Phosphoserine; by ATM and ATR and dsDNA kinase.);COMPBIAS (Poly-Ala.);REGION (RBCC domain.);REGION (Leucine zipper alpha helical coiled-coil region.);REGION (Interaction with …
P34932	SKVLTFYR	YES	Heat shock 70 kDa protein 4	HSPA4;Heat shock 70 kDa protein 4;HSP70RY ;Heat shock 70-related protein APG-2;HSP74;	(Human)	5	VFSKNHAAPF	SKVLTFYRKE	429	840								MOD_RES (N6-acetyllysine (By similarity).);MOD_RES (Phosphoserine.);MOD_RES (Phosphotyrosine.)	CHAIN (Heat shock 70 kDa protein 4.)	MOD_RES (N6-acetyllysine.);MOD_RES (Phosphothreonine.);MOD_RES (Phosphoserine.);MOD_RES (Phosphotyrosine (By similarity).)
P62316	EMTPEELQKR	YES	Small nuclear ribonucleoprotein Sm D2	SNRPD2;Small nuclear ribonucleoprotein Sm D2;snRNP core protein D2;SMD2;	(Human)	19	MSLLNKPKS	EMTPEELQKR	10	118					Subtiligase Based Positive Selection			MOD_RES (N-acetylserine.);INIT_MET (Removed.)	CHAIN (Small nuclear ribonucleoprotein Sm D2.)	MOD_RES (Phosphothreonine.)
P52597	GFTTDLFGR	YES	Heterogeneous nuclear ribonucleoprotein F	HNRNPF;Heterogeneous nuclear ribonucleoprotein F;Nucleolin-like protein mcs94-1;HNRPF;	(Human)	10	EEYSGLSDGY	GFTTDLFGRD	254	415				CASP1;CATB	Subtiligase Based Positive Selection;unknown		MMP2->A2M->CTSB->HNRNPF; MMP2->A2M->CTSB->HNRNPF; MMP2->CST3->CTSB->HNRNPF; MMP2->CTSL->CTSB->HNRNPF; MMP2->CST3->CTSB->HNRNPF; MMP2->CTSL->CTSB->HNRNPF	MOD_RES (N-acetylmethionine; in Heterogeneous nuclear ribonucleoprotein F; alternate.);MOD_RES (N-acetylmethionine; in Heterogeneous nuclear ribonucleoprotein F, N-terminally processed.);MOD_RES (Phosphoserine.);MOD_RES (N6-acetyllysine.);REGION (Interaction with RNA.);CROSSLNK (Glycyl lysine isopeptide (Lys-Gly) (interchain with G-Cter in SUMO).);DOMAIN (RRM 1.);DOMAIN (RRM 2.);MUTAGEN (W->A: Lo…	CHAIN (Heterogeneous nuclear ribonucleoprotein F.);CHAIN (Heterogeneous nuclear ribonucleoprotein F, N-terminally processed.)	REGION (Interaction with RNA.);DOMAIN (RRM 3.);SITE (Interaction with RNA.)
Q9Y617	SKMNIPFR	YES	Phosphoserine aminotransferase	PSAT1;Phosphoserine aminotransferase;Phosphohydroxythreonine aminotransferase Short=PSAT;SERC;	(Human)	9	YVCPVEPQNR	SKMNIPFRIG	299	370								MOD_RES (N-acetylmethionine.);MOD_RES (N6-acetyllysine.);MOD_RES (N6-acetyllysine (By similarity).);MOD_RES (N6-(pyridoxal phosphate)lysine (By similarity).);REGION (Pyridoxal phosphate binding (By similarity).);BINDING (L-glutamate (By similarity).);BINDING (Pyridoxal phosphate (By similarity).)	CHAIN (Phosphoserine aminotransferase.)	MOD_RES (N6-acetyllysine.)
P61204	EGLDWLANQLKNKK	YES	ADP-ribosylation factor 3	ARF3;ADP-ribosylation factor 3;ARF3;	(Human)	12	TCATSGDGLY	EGLDWLANQL	168	181								NP_BIND (GTP (By similarity).);LIPID (N-myristoyl glycine (Potential).);INIT_MET (Removed (Potential).)	CHAIN (ADP-ribosylation factor 3.)
P07711	EPLFYEAPR	YES	Cathepsin L1	CTSL;Cathepsin L1;Cathepsin L ;Major excreted protein Short=MEP;CATL1;C01.032	(Human)	9	RKPRKGKVFQ	EPLFYEAPRS	108	333				CATL1			MMP2->A2M->CTSL->CTSL; MMP2->A2M->CTSL->CTSL; MMP2->A2M->CTSL->CTSL; MMP2->A2M->CTSL->CTSL; MMP2->CST3->CTSL->CTSL; MMP2->CST3->CTSL->CTSL; MMP2->CST3->CTSL->CTSL; MMP2->CST3->CTSL->CTSL	SIGNAL (Potential.)	PROPEP (Activation peptide.)	DISULFID ();DISULFID (Interchain (between heavy and light chains).);ACT_SITE ();CHAIN (Cathepsin L1 heavy chain.);CHAIN (Cathepsin L1 light chain.);CARBOHYD (N-linked (GlcNAc...).);PROPEP ()	90	-184
O00584	EIKDLLPEMR	YES	Ribonuclease T2	RNASET2;Ribonuclease T2;Ribonuclease 6;RNT2;	(Human)	6	CNRSWPFNLE	EIKDLLPEMR	85	256								ACT_SITE (By similarity.);DISULFID ();SIGNAL (Potential.);CARBOHYD (N-linked (GlcNAc...).)	DISULFID ();CHAIN (Ribonuclease T2.)	ACT_SITE (By similarity.);DISULFID ();CARBOHYD (N-linked (GlcNAc...).)	60
P13693	EMFSDIYKIR	YES	Translationally-controlled tumor protein	TPT1;Translationally-controlled tumor protein;Fortilin ;Histamine-releasing factor Short=HRF ;p23;TCTP;	(Human)	13	IIYRDLISHD	EMFSDIYKIR	12	172			X	MEP1B;MEP1A;GRAB			MMP2->PLG->MEP1A->TPT1; MMP2->PLG->MEP1A->TPT1; MMP2->CST3->MEP1A->TPT1; MMP2->CTSC->GZMB->TPT1; MMP2->CTSC->GZMB->TPT1; MMP2->CST3->MEP1A->TPT1		CHAIN (Translationally-controlled tumor protein.)	MOD_RES (Phosphoserine; by PLK1.);MOD_RES (Phosphoserine.)
Q9Y6N7	EATGNPQPAIFWR	YES	Roundabout homolog 1	ROBO1;Roundabout homolog 1;Deleted in U twenty twenty ;H-Robo-1;ROBO1;	(Human)	3	ALGRTVTFQC	EATGNPQPAI	373	1651								DISULFID ();DISULFID (Potential.);SIGNAL (Potential.);DOMAIN (Ig-like C2-type 1.);DOMAIN (Ig-like C2-type 2.);DOMAIN (Ig-like C2-type 3.);CARBOHYD (N-linked (GlcNAc...) (Potential).)	DISULFID (Potential.);DOMAIN (Ig-like C2-type 4.);CHAIN (Roundabout homolog 1.);TOPO_DOM (Extracellular (Potential).)	MOD_RES (Phosphoserine.);MOD_RES (Phosphotyrosine; by ABL; in vitro.);MOD_RES (Phosphothreonine.);DISULFID (Potential.);DOMAIN (Ig-like C2-type 5.);DOMAIN (Fibronectin type-III 1.);DOMAIN (Fibronectin type-III 2.);DOMAIN (Fibronectin type-III 3.);TOPO_DOM (Cytoplasmic (Potential).);CARBOHYD (N-linked (GlcNAc...) (Potential).);TRANSMEM (Helical; (Potential).)	347		-546
O43583	KTVPQKVTIAKIPR	YES	Density-regulated protein	DENR;Density-regulated protein;Protein DRP1 ;Smooth muscle cell-associated protein 3 Short=SMAP-3;DENR;	(Human)	12	GGRGQIKQKK	KTVPQKVTIA	109	198								MOD_RES (N-acetylalanine.);MOD_RES (Phosphoserine.);INIT_MET (Removed.)	CHAIN (Density-regulated protein.)	DOMAIN (SUI1.)
Q5BLP8	EPAGSAVPAQSRPCVDCHAFEFMQR	YES	Neuropeptide-like protein C4orf48	C4orf48;Neuropeptide-like protein C4orf48;CD048;	(Human)	4	LALLGARARA	EPAGSAVPAQ	35	95	X	X						SIGNAL (Potential.)		CHAIN (Neuropeptide-like protein C4orf48.)	0
Q9H902	GLNVAATAAVMAASKGQGALSER	YES	Receptor expression-enhancing protein 1	REEP1;Receptor expression-enhancing protein 1;REEP1;	(Human)	2	YDALVHFGKR	GLNVAATAAV	125	201								TRANSMEM (Helical; (Potential).)	CHAIN (Receptor expression-enhancing protein 1.)	MOD_RES (Phosphoserine.);COMPBIAS (Poly-Pro.)			69
P14550	ELIAHCQAR	YES	Alcohol dehydrogenase [NADP(+)]	AKR1A1;Alcohol dehydrogenase [NADP(+)];Aldehyde reductase ;Aldo-keto reductase family 1 member A1;AK1A1;	(Human)	1	VECHPYLAQN	ELIAHCQARG	195	325								SITE (Lowers pKa of active site Tyr.);INIT_MET (Removed.);MOD_RES (N-acetylalanine.);MOD_RES (N6-acetyllysine; alternate (By similarity).);MOD_RES (N6-succinyllysine; alternate (By similarity).);MOD_RES (N6-succinyllysine (By similarity).);ACT_SITE (Proton donor.);MUTAGEN (Y->F: Complete loss of enzymatic activity.);MUTAGEN (Y->H: Complete loss of enzymatic activity.);MUTAGEN (K->M: Complete loss…	CHAIN (Alcohol dehydrogenase [NADP(+)].)	NP_BIND (NADP (By similarity).);MUTAGEN (I->A: No change in enzymatic activity.);MUTAGEN (I->C: No change in enzymatic activity.);MUTAGEN (V->C: No change in enzymatic activity.)
Q9BXJ9	PAVSLPPKENALFKR	YES	N-alpha-acetyltransferase 15, NatA auxiliary subunit	NAA15;N-alpha-acetyltransferase 15, NatA auxiliary subunit;Gastric cancer antigen Ga19 ;N-terminal acetyltransferase ;NMDA receptor-regulated protein 1 ;Protein tubedown-1 ;Tbdn100;NAA15;	(Human)	4	M	PAVSLPPKEN	2	866	X	X			COFRADIC				CHAIN (N-alpha-acetyltransferase 15, NatA auxiliary subunit.)	COMPBIAS (Poly-Asp.);MOTIF (Bipartite nuclear localization signal (Potential).);MOD_RES (N6-acetyllysine.);MOD_RES (Phosphothreonine.);MOD_RES (Phosphoserine.);MOD_RES (Phosphoserine (By similarity).);REGION (Interaction with HYPK.);REPEAT (TPR 1.);REPEAT (TPR 2.);REPEAT (TPR 3.);REPEAT (TPR 4.);REPEAT (TPR 5.);REPEAT (TPR 6.);REPEAT (TPR 7.);REPEAT (TPR 8.)
Q7Z4H3	EYEDLEHKPGR	YES	HD domain-containing protein 2	HDDC2;HD domain-containing protein 2;Hepatitis C virus NS5A-transactivated protein 2 Short=HCV NS5A-transactivated protein 2;HDDC2;	(Human)	6	DQCEMILQAS	EYEDLEHKPG	153	204								MOD_RES (N-acetylalanine.);DOMAIN (HD.);INIT_MET (Removed.)	CHAIN (HD domain-containing protein 2.)
P60983	EDLTEEWLR	YES	Glia maturation factor beta	GMFB;Glia maturation factor beta;GMFB;	(Human)	14	LTKVFEIRNT	EDLTEEWLRE	127	142								MOD_RES (N-acetylserine.);INIT_MET (Removed.)	CHAIN (Glia maturation factor beta.);DOMAIN (ADF-H.)
P09651	EVDAAMNARPHKVDGR	YES	Heterogeneous nuclear ribonucleoprotein A1	HNRNPA1;Heterogeneous nuclear ribonucleoprotein A1;Helix-destabilizing protein ;Single-strand RNA-binding protein ;hnRNP core protein A1;ROA1;	(Human)	12	FGFVTYATVE	EVDAAMNARP	67	372				MEP1B	Subtiligase Based Positive Selection			MOD_RES (N-acetylmethionine.);MOD_RES (N-acetylserine; in Heterogeneous nuclear ribonucleoprotein A1, N-terminally processed.);MOD_RES (Phosphoserine.);MOD_RES (N6-acetyllysine.);INIT_MET (Removed; alternate.)	REGION (Globular A domain.);DOMAIN (RRM 1.);CHAIN (Heterogeneous nuclear ribonucleoprotein A1.);CHAIN (Heterogeneous nuclear ribonucleoprotein A1, N-terminally processed.)	MOD_RES (Phosphoserine; by MKNK2.);MOD_RES (Asymmetric dimethylarginine; alternate (By similarity).);MOD_RES (Dimethylated arginine; alternate.);MOD_RES (Phosphoserine.);MOD_RES (Omega-N-methylarginine; alternate.);MOD_RES (N6-acetyllysine.);COMPBIAS (Gly-rich.);REGION (Globular B domain.);REGION (RNA-binding RGG-box.);REGION (Nuclear targeting sequence (M9).);DOMAIN (RRM 2.);MUTAGEN (G->A: No nu…
Q15393	EDTPQLYVACGR	YES	Splicing factor 3B subunit 3	SF3B3;Splicing factor 3B subunit 3;Pre-mRNA-splicing factor SF3b 130 kDa subunit Short=SF3b130 ;STAF130 ;Spliceosome-associated protein 130 Short=SAP 130;SF3B3;	(Human)	16	LFCQIADLAN	EDTPQLYVAC	418	1217									CHAIN (Splicing factor 3B subunit 3.)
Q14739	SASASHQADIKEAR	YES	Lamin-B receptor	LBR;Lamin-B receptor;Integral nuclear envelope inner membrane protein ;LMN2R;LBR;	(Human)	1	PGRPPKSARR	SASASHQADI	97	615					Subtiligase Based Positive Selection;unknown			MOD_RES (N6-acetyllysine.);MOD_RES (Phosphoserine (By similarity).);MOD_RES (Phosphoserine; by CDK1.);DOMAIN (Tudor.)	TOPO_DOM (Nuclear (Potential).);CHAIN (Lamin-B receptor.)	TRANSMEM (Helical; (Potential).);MOD_RES (Phosphoserine.);MOD_RES (Phosphothreonine.);MOD_RES (N6-acetyllysine.)			-485
Q99435	EQFFQKLR	YES	Protein kinase C-binding protein NELL2	NELL2;Protein kinase C-binding protein NELL2;NEL-like protein 2 ;Nel-related protein 2;NELL2;	(Human)	12	RSIKASTATA	EQFFQKLRNK	75	816								SIGNAL ();CARBOHYD (N-linked (GlcNAc...) (Potential).)	CHAIN (Protein kinase C-binding protein NELL2.);DOMAIN (Laminin G-like.)	DISULFID (By similarity.);CARBOHYD (N-linked (GlcNAc...) (Potential).);DOMAIN (VWFC 1.);DOMAIN (EGF-like 1.);DOMAIN (EGF-like 2; calcium-binding (Potential).);DOMAIN (EGF-like 3; calcium-binding (Potential).);DOMAIN (EGF-like 4.);DOMAIN (EGF-like 5; calcium-binding (Potential).);DOMAIN (EGF-like 6; calcium-binding (Potential).);DOMAIN (VWFC 2.);DOMAIN (VWFC 3.)	53
Q13332	EVGPGPESSPVVVR	YES	Receptor-type tyrosine-protein phosphatase S	PTPRS;Receptor-type tyrosine-protein phosphatase S;Receptor-type tyrosine-protein phosphatase sigma Short=R-PTP-sigma;PTPRS;	(Human)	19	QYRITTVAHT	EVGPGPESSP	701	1948								COMPBIAS (Poly-Pro.);DISULFID (Potential.);SIGNAL (Potential.);DOMAIN (Ig-like C2-type 1.);DOMAIN (Ig-like C2-type 2.);DOMAIN (Ig-like C2-type 3.);DOMAIN (Fibronectin type-III 1.);DOMAIN (Fibronectin type-III 2.);DOMAIN (Fibronectin type-III 3.);CARBOHYD (N-linked (GlcNAc...) (Potential).)	DOMAIN (Fibronectin type-III 4.);CHAIN (Receptor-type tyrosine-protein phosphatase S.);TOPO_DOM (Extracellular (Potential).)	ACT_SITE (Phosphocysteine intermediate (By similarity).);REGION (Substrate binding (By similarity).);DOMAIN (Fibronectin type-III 5.);DOMAIN (Fibronectin type-III 6.);DOMAIN (Fibronectin type-III 7.);DOMAIN (Fibronectin type-III 8.);DOMAIN (Tyrosine-protein phosphatase 1.);DOMAIN (Tyrosine-protein phosphatase 2.);BINDING (Substrate (By similarity).);TOPO_DOM (Cytoplasmic (Potential).);CARBOHYD (N…	671		-603
P33316	ARPAEVGGMQLR	YES	Deoxyuridine 5'-triphosphate nucleotidohydrolase, mitochondrial	DUT;Deoxyuridine 5'-triphosphate nucleotidohydrolase, mitochondrial;dUTP pyrophosphatase;DUT;	(Human)	15	ETPAISPSKR	ARPAEVGGMQ	104	252								MOD_RES (Phosphoserine.);TRANSIT (Mitochondrion.);MUTAGEN (S->A: Loss of phosphorylation.)	CHAIN (Deoxyuridine 5'-triphosphate nucleotidohydrolase, mitochondrial.)	REGION (Substrate binding.);BINDING (Substrate; via amide nitrogen and carbonyl oxygen.);BINDING (Substrate (By similarity).)				34
Q52MB2	ELMEHLKAQLQALFEDVR	YES	Coiled-coil domain-containing protein 184	CCDC184;Coiled-coil domain-containing protein 184;CC184;	(Human)	12	ISGEYNGGMK	ELMEHLKAQL	42	194									CHAIN (Coiled-coil domain-containing protein 184.);COILED (Potential.)	COMPBIAS (Poly-Glu.)
P06753	ELQEIQLKEAKHIAEEADRKYEEVAR	YES	Tropomyosin alpha-3 chain	TPM3;Tropomyosin alpha-3 chain;Gamma-tropomyosin ;Tropomyosin-3 ;Tropomyosin-5 Short=hTM5;TPM3;	(Human)	1	NRALKDEEKM	ELQEIQLKEA	143	285									CHAIN (Tropomyosin alpha-3 chain.);COILED (By similarity.)
P19338	ELKEVFEDAAEIR	YES	Nucleolin	NCL;Nucleolin;Protein C23;NUCL;	(Human)	2	KNLPYKVTQD	ELKEVFEDAA	408	710				MEP1A;MEP1B;GRAB			MMP2->PLG->MEP1A->NCL; MMP2->PLG->MEP1A->NCL; MMP2->CST3->MEP1A->NCL; MMP2->CTSC->GZMB->NCL; MMP2->CTSC->GZMB->NCL; MMP2->CST3->MEP1A->NCL	COMPBIAS (Asp/Glu-rich (acidic).);MOD_RES (N6-acetyllysine.);MOD_RES (N6-acetyllysine (By similarity).);MOD_RES (Phosphoserine.);MOD_RES (Phosphothreonine.);REGION (8 X 8 AA tandem repeats of X-T-P-X-K-K-X- X.);REPEAT (1.);REPEAT (2.);REPEAT (3.);REPEAT (4.);REPEAT (5; truncated.);REPEAT (6.);REPEAT (7.);REPEAT (8.);DOMAIN (RRM 1.);INIT_MET (Removed.)	CHAIN (Nucleolin.);DOMAIN (RRM 2.)	COMPBIAS (Arg/Gly/Phe-rich.);MOD_RES (N6-acetyllysine (By similarity).);MOD_RES (N6-acetyllysine.);MOD_RES (Phosphoserine.);MOD_RES (Asymmetric dimethylarginine (By similarity).);DOMAIN (RRM 3.);DOMAIN (RRM 4.)
P62937	GKHVVFGKVKEGMNIVEAMER	YES	Peptidyl-prolyl cis-trans isomerase A	PPIA;Peptidyl-prolyl cis-trans isomerase A;Cyclophilin A ;Cyclosporin A-binding protein ;Rotamase A;PPIA;	(Human)	7	ICTAKTEWLD	GKHVVFGKVK	124	165								MOD_RES (N-acetylmethionine.);MOD_RES (N-acetylvaline; partial; in Peptidyl- prolyl cis-trans isomerase A, N- terminally processed.);MOD_RES (N6-acetyllysine; alternate.);MOD_RES (N6-acetyllysine.);MOD_RES (Phosphothreonine.);INIT_MET (Removed; alternate.);MUTAGEN (W->A: 200-fold decrease of sensitivity to CsA.);MUTAGEN (W->F: 75-fold decrease of sensitivity to CsA.);CARBOHYD (N-linked (GlcNAc...…	DOMAIN (PPIase cyclophilin-type.);CHAIN (Peptidyl-prolyl cis-trans isomerase A.);CHAIN (Peptidyl-prolyl cis-trans isomerase A, N- terminally processed.)	MOD_RES (N6-acetyllysine.);MOD_RES (N6-acetyllysine (By similarity).)
P63241	GYLSLLQDSGEVR	YES	Eukaryotic translation initiation factor 5A-1	EIF5A;Eukaryotic translation initiation factor 5A-1;Eukaryotic initiation factor 5A isoform 1 Short=eIF-5A ;Rev-binding factor ;eIF-4D;IF5A1;	(Human)	17	NDFQLIGIQD	GYLSLLQDSG	97	154				GRAB	Subtiligase Based Positive Selection;N-TAILS		MMP2->CTSC->GZMB->EIF5A	MOD_RES (N-acetylalanine.);MOD_RES (N6-acetyllysine.);MOD_RES (Hypusine.);REGION (DOHH-binding.);MUTAGEN (K->A,R: Abolishes acetylation.);MUTAGEN (K->D: Causes total inactivation of eIF5A in supporting yeast growth.);MUTAGEN (G->A: Causes total inactivation of eIF5A in supporting yeast growth.);MUTAGEN (K->A: Decreases significantly the acetylation at position K-47 and causes total inactivation o…	CHAIN (Eukaryotic translation initiation factor 5A-1.)	MOD_RES (N6-acetyllysine (By similarity).)
Q15907	GAVGALLVYDIAKHLTYENVER	YES	Ras-related protein Rab-11B	RAB11B;Ras-related protein Rab-11B;GTP-binding protein YPT3;RB11B;	(Human)	19	YRAITSAYYR	GAVGALLVYD	83	218								MOD_RES (N-acetylglycine.);MOD_RES (Citrulline (By similarity).);INIT_MET (Removed.);NP_BIND (GTP.);MOTIF (Effector region (By similarity).);MUTAGEN (S->N: Dominant negative mutant locked in the inactive GDP-bound form; alters apical recycling.);MUTAGEN (Q->L: Constitutively active mutant locked in the active GTP-bound form; alters apical recycling.)	CHAIN (Ras-related protein Rab-11B.)	MOD_RES (Cysteine methyl ester (Potential).);PROPEP (Removed in mature form (Potential).);NP_BIND (GTP.);LIPID (S-geranylgeranyl cysteine.)		-136
P22626	SSMAEVDAAMAARPHSIDGR	YES	Heterogeneous nuclear ribonucleoproteins A2/B1	HNRNPA2B1;Heterogeneous nuclear ribonucleoproteins A2/B1;ROA2;	(Human)	7	RSRGFGFVTF	SSMAEVDAAM	70	353				CATB	Subtiligase Based Positive Selection		MMP2->A2M->CTSB->HNRNPA2B1; MMP2->A2M->CTSB->HNRNPA2B1; MMP2->CST3->CTSB->HNRNPA2B1; MMP2->CTSL->CTSB->HNRNPA2B1; MMP2->CST3->CTSB->HNRNPA2B1; MMP2->CTSL->CTSB->HNRNPA2B1	MOD_RES (N-acetylmethionine.);MOTIF (Nuclear localization signal (Potential).)	DOMAIN (RRM 1.);CHAIN (Heterogeneous nuclear ribonucleoproteins A2/B1.)	MOD_RES (Phosphoserine.);MOD_RES (N6,N6-dimethyllysine.);MOD_RES (N6-acetyllysine.);MOD_RES (Dimethylated arginine; alternate.);MOD_RES (Omega-N-methylarginine; alternate.);MOD_RES (Phosphotyrosine.);COMPBIAS (Gly-rich.);REGION (Nuclear targeting sequence (By similarity).);DOMAIN (RRM 2.)
P21741	VKKGGPGSECAEWAWGPCTPSSKDCGVGFR	YES	Midkine	MDK;Midkine;Amphiregulin-associated protein Short=ARAP ;Midgestation and kidney protein ;Neurite outgrowth-promoting factor 2 ;Neurite outgrowth-promoting protein;MK;	(Human)	11	TSAVAKKKDK	VKKGGPGSEC	28	143								SIGNAL ()	CHAIN (Midkine.)	DISULFID ()	7
P21333	EKDLAEDAPWKKIQQNTFTR	YES	Filamin-A	FLNA;Filamin-A;Actin-binding protein 280 Short=ABP-280 ;Alpha-filamin ;Endothelial actin-binding protein ;Filamin-1 ;Non-muscle filamin;FLNA;	(Human)	X	DTRDAEMPAT	EKDLAEDAPW	32	2647				MEP1A;MEP1B			MMP2->PLG->MEP1A->FLNA; MMP2->PLG->MEP1A->FLNA; MMP2->CST3->MEP1A->FLNA; MMP2->CST3->MEP1A->FLNA	MOD_RES (N-acetylserine.);MOD_RES (Phosphoserine.);INIT_MET (Removed.)	CHAIN (Filamin-A.);DOMAIN (Actin-binding.)	MOD_RES (N6-acetyllysine (By similarity).);MOD_RES (N6-acetyllysine.);MOD_RES (N6-acetyllysine; alternate (By similarity).);MOD_RES (N6-succinyllysine; alternate (By similarity).);MOD_RES (Phosphoserine.);MOD_RES (Phosphothreonine.);REGION (Interaction with furin (By similarity).);REGION (Hinge 1.);REGION (Self-association site, tail.);REGION (Hinge 2.);REPEAT (Filamin 1.);REPEAT (Filamin 2.);REP…
Q4VC31	EEFAEFQELLKVMR	YES	Coiled-coil domain-containing protein 58	CCDC58;Coiled-coil domain-containing protein 58;CCD58;	(Human)	3	MAAPSGGVNC	EEFAEFQELL	11	144								INIT_MET (Removed.);MOD_RES (N-acetylalanine.)	CHAIN (Coiled-coil domain-containing protein 58.)	MOD_RES (N6-acetyllysine.);COILED (Potential.)
P68363	LISQIVSSITASLR	YES	Tubulin alpha-1B chain	TUBA1B;Tubulin alpha-1B chain;Alpha-tubulin ubiquitous ;Tubulin K-alpha-1 ;Tubulin alpha-ubiquitous chain;TBA1B;	(Human)	12	ERPTYTNLNR	LISQIVSSIT	230	451								MOD_RES (Phosphoserine.);MOD_RES (Nitrated tyrosine (By similarity).);NP_BIND (GTP (Potential).)	CHAIN (Tubulin alpha-1B chain.)	MOD_RES (Phosphoserine.);MOD_RES (Nitrated tyrosine (By similarity).);MOD_RES (Omega-N-methylarginine.);MOD_RES (Phosphotyrosine (By similarity).);MOD_RES (Phosphoserine (By similarity).);SITE (Involved in polymerization.);CROSSLNK (Glycyl lysine isopeptide (Lys-Gly) (interchain with G-Cter in ubiquitin).)
P25398	EEGIAAGGVMDVNTALQEVLKTALIHDGLAR	YES	40S ribosomal protein S12	RPS12;40S ribosomal protein S12;RS12;	(Human)	6	MA	EEGIAAGGVM	3	132		X			COFRADIC;other			MOD_RES (N-acetylalanine.);INIT_MET (Removed.)	CHAIN (40S ribosomal protein S12.)	MOD_RES (N6-succinyllysine (By similarity).)
P26599	AGMAMAGQSPVLR	YES	Polypyrimidine tract-binding protein 1	PTBP1;Polypyrimidine tract-binding protein 1;57 kDa RNA-binding protein PPTB-1 ;Heterogeneous nuclear ribonucleoprotein I Short=hnRNP I;PTBP1;	(Human)	19	ALAASAAAVD	AGMAMAGQSP	173	531				GRAB;CASP3	Subtiligase Based Positive Selection;unknown		MMP2->CTSC->GZMB->PTBP1; MMP2->CTSC->GZMB->PTBP1	MOD_RES (N-acetylmethionine.);MOD_RES (Phosphoserine.);MOD_RES (Phosphothreonine.);DOMAIN (RRM 1.)	CHAIN (Polypyrimidine tract-binding protein 1.)	MOD_RES (Phosphoserine.);COMPBIAS (Poly-Ala.);DOMAIN (RRM 2.);DOMAIN (RRM 3.);DOMAIN (RRM 4.)
Q9NS15	SRPHGACVPQR	YES	Latent-transforming growth factor beta-binding protein 3	LTBP3;Latent-transforming growth factor beta-binding protein 3;LTBP3;	(Human)	11	RCVCKAGFAR	SRPHGACVPQ	1291	1303								DISULFID (By similarity.);COMPBIAS (Gly-rich.);COMPBIAS (Cys-rich.);SIGNAL (Potential.);CARBOHYD (N-linked (GlcNAc...) (Potential).);DOMAIN (EGF-like 1.);DOMAIN (TB 1.);DOMAIN (EGF-like 2; calcium-binding (Potential).);DOMAIN (TB 2.);DOMAIN (EGF-like 3.);DOMAIN (EGF-like 4; calcium-binding (Potential).);DOMAIN (EGF-like 5; calcium-binding (Potential).);DOMAIN (EGF-like 6; calcium-binding (Potenti…	DISULFID (By similarity.);CHAIN (Latent-transforming growth factor beta- binding protein 3.);DOMAIN (EGF-like 13; calcium-binding (Potential).)		1247
Q9Y490	TVSDSIKKLITSMR	YES	Talin-1	TLN1;Talin-1;TLN1;	(Human)	9	SWSVLAGHSR	TVSDSIKKLI	1639	2541								MOD_RES (Phosphoserine.);MOD_RES (Phosphotyrosine (By similarity).);MOD_RES (N6-acetyllysine (By similarity).);REGION (Interaction with LAYN (By similarity).);DOMAIN (FERM.)	REGION (Interaction with SYNM.);CHAIN (Talin-1.)	MOD_RES (N6-acetyllysine.);MOD_RES (Phosphoserine.);DOMAIN (I/LWEQ.)
P31946	YDDMAAAMKAVTEQGHELSNEER	YES	14-3-3 protein beta/alpha	YWHAB;14-3-3 protein beta/alpha;Protein 1054 ;Protein kinase C inhibitor protein 1 Short=KCIP-1;1433B;	(Human)	20	KAKLAEQAER	YDDMAAAMKA	21	246								INIT_MET (Removed; alternate.);MOD_RES (N-acetylmethionine; in 14-3-3 protein beta/alpha; alternate.);MOD_RES (N-acetylthreonine; in 14-3-3 protein beta/alpha, N-terminally processed.)	CHAIN (14-3-3 protein beta/alpha.);CHAIN (14-3-3 protein beta/alpha, N-terminally processed.)	SITE (Interaction with phosphoserine on interacting protein (By similarity).);MOD_RES (Phosphoserine (By similarity).);MOD_RES (N6-acetyllysine.);MOD_RES (Nitrated tyrosine (By similarity).)
Q9Y237	HILCEKHGKIMEAMEKLKSGMR	YES	Peptidyl-prolyl cis-trans isomerase NIMA-interacting 4	PIN4;Peptidyl-prolyl cis-trans isomerase NIMA-interacting 4;Parvulin-14 Short=Par14 Short=hPar14 ;Parvulin-17 Short=Par17 Short=hPar17 ;Peptidyl-prolyl cis-trans isomerase Pin4 Short=PPIase Pin4 ;Peptidyl-prolyl cis/trans isomerase EPVH Short=hEPVH ;Rotamase Pin4;PIN4;	(Human)	X	KGGGNAVKVR	HILCEKHGKI	42	131								MOD_RES (Phosphoserine; by CK2.);REGION (Necessary for association with the pre- rRNP complexes.);REGION (Necessary for nuclear localization and DNA-binding.);MUTAGEN (S->A: Abolishes phosphorylation and reduces strongly nuclear localization.);MUTAGEN (S->E: Does not abolish nuclear localization and reduces DNA-binding ability.)	DOMAIN (PpiC.);CHAIN (Peptidyl-prolyl cis-trans isomerase NIMA- interacting 4.)
P39748	GIQGLAKLIADVAPSAIR	YES	Flap endonuclease 1	FEN1;Flap endonuclease 1;DNase IV ;Flap structure-specific endonuclease 1 ;Maturation factor 1 Short=MF1 Short=hFEN-1;FEN1;	(Human)	11	M	GIQGLAKLIA	2	380	X	X			COFRADIC				CHAIN (Flap endonuclease 1.);REGION (N-domain.)	METAL (Magnesium 1.);METAL (Magnesium 2.);MOD_RES (Symmetric dimethylarginine; by PRMT5.);MOD_RES (N6-acetyllysine.);MOD_RES (Phosphoserine; by CDK2.);MOD_RES (Phosphoserine.);MOD_RES (Phosphothreonine.);REGION (I-domain.);REGION (Interaction with PCNA.);BINDING (DNA substrate.);MUTAGEN (R->A: No significant effect on exonuclease activity or flap endonuclease activity.);MUTAGEN (D->A: Loss of fla…
P55209	GLVETPTGYIESLPR	YES	Nucleosome assembly protein 1-like 1	NAP1L1;Nucleosome assembly protein 1-like 1;NAP-1-related protein Short=hNRP;NP1L1;	(Human)	12	ILAALQERLD	GLVETPTGYI	58	391				GRAM;GRAB	Subtiligase Based Positive Selection;unknown		MMP2->CTSC->GZMB->NAP1L1	COMPBIAS (Asp/Glu-rich (acidic).);MOD_RES (N-acetylalanine.);MOD_RES (Phosphoserine.);INIT_MET (Removed.)	CHAIN (Nucleosome assembly protein 1-like 1.)	COMPBIAS (Asp/Glu-rich (acidic).);MOTIF (Nuclear localization signal (Potential).);MOD_RES (Phosphothreonine.);MOD_RES (Phosphoserine.);MOD_RES (N6-acetyllysine.);MOD_RES (Cysteine methyl ester (Probable).);LIPID (S-farnesyl cysteine.);PROPEP (Removed in mature form (Probable).)		-334
O95757	SFDDPIVQTER	YES	Heat shock 70 kDa protein 4L	HSPA4L;Heat shock 70 kDa protein 4L;Heat shock 70-related protein APG-1 ;Osmotic stress protein 94;HS74L;	(Human)	4	IHGFKKLHGR	SFDDPIVQTE	74	839									CHAIN (Heat shock 70 kDa protein 4L.)	MOD_RES (Phosphothreonine.)
P37802	DDGLFSGDPNWFPKKSKENPR	YES	Transgelin-2	TAGLN2;Transgelin-2;Epididymis tissue protein Li 7e ;SM22-alpha homolog;TAGL2;	(Human)	1	MNLGGLAVAR	DDGLFSGDPN	140	199				MEP1B;MEP1A	Subtiligase Based Positive Selection		MMP2->PLG->MEP1A->TAGLN2; MMP2->PLG->MEP1A->TAGLN2; MMP2->CST3->MEP1A->TAGLN2; MMP2->CST3->MEP1A->TAGLN2	MOD_RES (N-acetylalanine.);MOD_RES (N6-acetyllysine.);INIT_MET (Removed.);DOMAIN (CH.)	CHAIN (Transgelin-2.)	MOD_RES (Phosphoserine.);REPEAT (Calponin-like.)
Q9Y237	AGKGGAASGSDSADKKAQGPKGGGNAVKVR	YES	Peptidyl-prolyl cis-trans isomerase NIMA-interacting 4	PIN4;Peptidyl-prolyl cis-trans isomerase NIMA-interacting 4;Parvulin-14 Short=Par14 Short=hPar14 ;Parvulin-17 Short=Par17 Short=hPar17 ;Peptidyl-prolyl cis-trans isomerase Pin4 Short=PPIase Pin4 ;Peptidyl-prolyl cis/trans isomerase EPVH Short=hEPVH ;Rotamase Pin4;PIN4;	(Human)	X	PPKGKSGSGK	AGKGGAASGS	12	131									REGION (Necessary for association with the pre- rRNP complexes.);REGION (Necessary for nuclear localization and DNA-binding.);CHAIN (Peptidyl-prolyl cis-trans isomerase NIMA- interacting 4.)	MOD_RES (Phosphoserine; by CK2.);DOMAIN (PpiC.);MUTAGEN (S->A: Abolishes phosphorylation and reduces strongly nuclear localization.);MUTAGEN (S->E: Does not abolish nuclear localization and reduces DNA-binding ability.)
Q9UK45	EKKKKESILDLSKYIDKTIR	YES	U6 snRNA-associated Sm-like protein LSm7	LSM7;U6 snRNA-associated Sm-like protein LSm7;LSM7;	(Human)	19	MADK	EKKKKESILD	5	103		X			COFRADIC			MOD_RES (N-acetylalanine.);INIT_MET (Removed.)	CHAIN (U6 snRNA-associated Sm-like protein LSm7.)
P55769	SVTIKEGSQLKQQIQSIQQSIER	YES	NHP2-like protein 1	NHP2L1;NHP2-like protein 1;High mobility group-like nuclear protein 2 homolog 1 ;OTK27 ;SNU13 homolog Short=hSNU13 ;U4/U6.U5 tri-snRNP 15.5 kDa protein;NH2L1;	(Human)	22	CGVSRPVIAC	SVTIKEGSQL	103	128								MOD_RES (N-acetylmethionine.);MOD_RES (N-acetylthreonine; in NHP2-like protein 1, N-terminally processed.);MOD_RES (N6-acetyllysine (By similarity).);MUTAGEN (G->K: Abolishes completely RNA-binding.);MUTAGEN (A->F: Abolishes completely RNA-binding.);MUTAGEN (Y->A: Abolishes 50% of RNA-binding.);INIT_MET (Removed; alternate.)	CHAIN (NHP2-like protein 1.);CHAIN (NHP2-like protein 1, N-terminally processed.);MUTAGEN (Missing: Abolishes completely RNA- binding.)
Q16222	LLFNAGNIANHFFTVPFLR	YES	UDP-N-acetylhexosamine pyrophosphorylase	UAP1;UDP-N-acetylhexosamine pyrophosphorylase;Antigen X Short=AGX ;Sperm-associated antigen 2 Includes: RecName: Full=UDP-N-acetylgalactosamine pyrophosphorylase EC=2.7.7.83 ;AGX-1 Includes: RecName: Full=UDP-N-acetylglucosamine pyrophosphorylase EC=2.7.7.23 ;AGX-2;UAP1;	(Human)	1	TAQKRSSDGR	LLFNAGNIAN	321	522								BINDING (Substrate.);MOTIF (Substrate binding.)	CHAIN (UDP-N-acetylhexosamine pyrophosphorylase.)	BINDING (Substrate.)
P62316	EEEEFNTGPLSVLTQSVKNNTQVLINCR	YES	Small nuclear ribonucleoprotein Sm D2	SNRPD2;Small nuclear ribonucleoprotein Sm D2;snRNP core protein D2;SMD2;	(Human)	19	EMTPEELQKR	EEEEFNTGPL	20	118								MOD_RES (N-acetylserine.);MOD_RES (Phosphothreonine.);INIT_MET (Removed.)	CHAIN (Small nuclear ribonucleoprotein Sm D2.)
P08253	IIGYTPDLDPETVDDAFAR	YES	72 kDa type IV collagenase	MMP2;72 kDa type IV collagenase;72 kDa gelatinase ;Gelatinase A ;Matrix metalloproteinase-2 Short=MMP-2 ;TBE-1;MMP2;M10.003	(Human)	16	KWDKNQITYR	IIGYTPDLDP	128	660				MMP2				SIGNAL (Potential.);METAL (Zinc 2; in inhibited form (By similarity).);MOTIF (Cysteine switch (By similarity).);PROPEP (Activation peptide.)	CHAIN (72 kDa type IV collagenase.);REGION (Collagenase-like 1.)	DISULFID (By similarity.);DISULFID ();CHAIN (PEX.);CARBOHYD (N-linked (GlcNAc...) (Potential).);METAL (Calcium 1 (By similarity).);METAL (Calcium 2 (By similarity).);METAL (Zinc 1 (By similarity).);METAL (Calcium 3 (By similarity).);METAL (Calcium 3; via carbonyl oxygen (By similarity).);METAL (Calcium 2; via carbonyl oxygen (By similarity).);METAL (Zinc 2; catalytic (By similarity).);METAL (Calc…	98	18
Q9H2H8	GGNSIWGKKFEDEYSEYLKHNVR	YES	Peptidyl-prolyl cis-trans isomerase-like 3	PPIL3;Peptidyl-prolyl cis-trans isomerase-like 3;Cyclophilin J Short=CyPJ ;Cyclophilin-like protein PPIL3 ;Rotamase PPIL3;PPIL3;	(Human)	2	QTGDPTGTGR	GGNSIWGKKF	62	161								MOD_RES (N-acetylserine.);INIT_MET (Removed.)	DOMAIN (PPIase cyclophilin-type.);CHAIN (Peptidyl-prolyl cis-trans isomerase-like 3.)
Q15366	SSPVIFAGGQDR	YES	Poly(rC)-binding protein 2	PCBP2;Poly(rC)-binding protein 2;Alpha-CP2 ;Heterogeneous nuclear ribonucleoprotein E2 Short=hnRNP E2;PCBP2;	(Human)	12	VTIPYRPKPS	SSPVIFAGGQ	188	365								MOD_RES (Phosphoserine.);DOMAIN (KH 1.);DOMAIN (KH 2.)	CHAIN (Poly(rC)-binding protein 2.)	MOD_RES (Phosphoserine.);DOMAIN (KH 3.)
Q9Y490	EISHLIEPLANAAR	YES	Talin-1	TLN1;Talin-1;TLN1;	(Human)	9	LHTQMLTAVQ	EISHLIEPLA	1708	2541								MOD_RES (Phosphoserine.);MOD_RES (Phosphotyrosine (By similarity).);MOD_RES (N6-acetyllysine (By similarity).);REGION (Interaction with LAYN (By similarity).);DOMAIN (FERM.)	REGION (Interaction with SYNM.);CHAIN (Talin-1.)	MOD_RES (N6-acetyllysine.);MOD_RES (Phosphoserine.);DOMAIN (I/LWEQ.)
P21741	GGPGSECAEWAWGPCTPSSKDCGVGFR	YES	Midkine	MDK;Midkine;Amphiregulin-associated protein Short=ARAP ;Midgestation and kidney protein ;Neurite outgrowth-promoting factor 2 ;Neurite outgrowth-promoting protein;MK;	(Human)	11	VAKKKDKVKK	GGPGSECAEW	31	143				MEP1A			MMP2->PLG->MEP1A->MDK; MMP2->PLG->MEP1A->MDK; MMP2->CST3->MEP1A->MDK; MMP2->CST3->MEP1A->MDK	SIGNAL ()	CHAIN (Midkine.)	DISULFID ()	10
P55072	EMFAQTLQQSR	YES	Transitional endoplasmic reticulum ATPase	VCP;Transitional endoplasmic reticulum ATPase;15S Mg(2+)-ATPase p97 subunit ;Valosin-containing protein Short=VCP;TERA;	(Human)	9	SVSDNDIRKY	EMFAQTLQQS	756	806								MOD_RES (N-acetylalanine.);MOD_RES (Phosphoserine.);MOD_RES (N6,N6,N6-trimethyllysine; by VCPKMT.);MOD_RES (Phosphothreonine.);MOD_RES (N6-acetyllysine (By similarity).);MOD_RES (N6-acetyllysine; alternate (By similarity).);MOD_RES (N6-succinyllysine; alternate (By similarity).);INIT_MET (Removed.);NP_BIND (ATP.);MUTAGEN (R->A: Minor effect on affinity for ATP and ADP.);MUTAGEN (R->A: Strongly in…	CHAIN (Transitional endoplasmic reticulum ATPase.)	MOD_RES (Phosphoserine.);MOD_RES (Phosphotyrosine (By similarity).);REGION (Interaction with UBXN6.)
P83731	ASLADIMAKR	YES	60S ribosomal protein L24	RPL24;60S ribosomal protein L24;60S ribosomal protein L30;RL24;	(Human)	3	AVKFQRAITG	ASLADIMAKR	85	157								MOD_RES (N6-acetyllysine.);MOD_RES (Phosphothreonine.)	CHAIN (60S ribosomal protein L24.)	MOD_RES (Phosphoserine.);MOD_RES (N6-acetyllysine.);MOD_RES (N6-succinyllysine (By similarity).)
P38159	ETNEKALEAVFGKYGR	YES	RNA-binding motif protein, X chromosome	RBMX;RNA-binding motif protein, X chromosome;Glycoprotein p43 ;Heterogeneous nuclear ribonucleoprotein G Short=hnRNP G;RBMX;	(Human)	X	GKLFIGGLNT	ETNEKALEAV	18	391								MOD_RES (N-acetylmethionine; in Heterogeneous nuclear ribonucleoprotein G; alternate.);MOD_RES (N-acetylvaline; in Heterogeneous nuclear ribonucleoprotein G, N-terminally processed.);INIT_MET (Removed; alternate.)	DOMAIN (RRM.);CHAIN (RNA-binding motif protein, X chromosome.);CHAIN (RNA-binding motif protein, X chromosome, N-terminally processed.)	MOD_RES (N6-acetyllysine.);MOD_RES (Phosphoserine.);REGION (Necessary for the association to nascent RNAPII transcripts and nuclear localization.);REGION (Necessary for RNA-binding.);MUTAGEN (K->A: Promotes cell proliferation. Inhibits transcriptional up-regulation of the TXNIP promoter.)
P83731	AITGASLADIMAKR	YES	60S ribosomal protein L24	RPL24;60S ribosomal protein L24;60S ribosomal protein L30;RL24;	(Human)	3	RTRRAVKFQR	AITGASLADI	81	157					Subtiligase Based Positive Selection;unknown			MOD_RES (N6-acetyllysine.)	CHAIN (60S ribosomal protein L24.)	MOD_RES (Phosphothreonine.);MOD_RES (Phosphoserine.);MOD_RES (N6-acetyllysine.);MOD_RES (N6-succinyllysine (By similarity).)
Q9BQT9	ENDNTVLLNPPLFALDKDAPLR	YES	Calsyntenin-3	CLSTN3;Calsyntenin-3;Alcadein-beta Short=Alc-beta;CSTN3;	(Human)	12	IEAEYQGIVM	ENDNTVLLNP	39	956								SIGNAL (Potential.)	TOPO_DOM (Extracellular (Potential).);DOMAIN (Cadherin 1.);CHAIN (Calsyntenin-3.)	TOPO_DOM (Cytoplasmic (Potential).);DOMAIN (Cadherin 2.);TRANSMEM (Helical; (Potential).);CARBOHYD (N-linked (GlcNAc...) (Potential).)	19		-830
P07814	TGAEDKDKKKKEKENKSEKQNKPQKQNDGQR	YES	Bifunctional glutamate/proline--tRNA ligase	EPRS;Bifunctional glutamate/proline--tRNA ligase;Bifunctional aminoacyl-tRNA synthetase ;Cell proliferation-inducing gene 32 protein ;Glutamatyl-prolyl-tRNA synthetase Includes: RecName: Full=Glutamate--tRNA ligase EC=6.1.1.17 ;Glutamyl-tRNA synthetase Short=GluRS Includes: RecName: Full=Proline--tRNA ligase EC=6.1.1.15 ;Prolyl-tRNA synthetase;SYEP;	(Human)	1	IGVEYKPVSA	TGAEDKDKKK	956	1512								MOD_RES (N6-acetyllysine; alternate.);MOD_RES (N6-malonyllysine; alternate.);MOD_RES (N6-acetyllysine.);MOD_RES (N6-acetyllysine (By similarity).);MOD_RES (Phosphotyrosine.);MOD_RES (Phosphoserine.);MOD_RES (Phosphoserine; by CDK5.);MOD_RES (Phosphothreonine.);NP_BIND (ATP (By similarity).);REGION (Glutamate--tRNA ligase.);DOMAIN (WHEP-TRS 1.);DOMAIN (WHEP-TRS 2.);MOTIF ("HIGH" region.);MOTIF ("K…	REGION (3 X 57 AA approximate repeats.);DOMAIN (WHEP-TRS 3.);CHAIN (Bifunctional glutamate/proline--tRNA ligase.)	MOD_RES (Phosphoserine.);MOD_RES (N6-acetyllysine.);REGION (Charged.);REGION (Proline--tRNA ligase.);MUTAGEN (S->A: Not active in translation inhibition, and abolishes release from multisynthetase complex and association with GAIT complex assembly upon interferon-gamma treatment.);MUTAGEN (S->D: Active in translation inhibition (phosphomimetic). No effect on GAIT complex association with eiF4G.)
P99999	ENPKKYIPGTKMIFVGIKKKEER	YES	Cytochrome c	CYCS;Cytochrome c;CYC;	(Human)	7	WGEDTLMEYL	ENPKKYIPGT	70	105								METAL (Iron (heme axial ligand).);MOD_RES (N-acetylglycine.);MOD_RES (Phosphotyrosine (By similarity).);BINDING (Heme (covalent).);INIT_MET (Removed.)	CHAIN (Cytochrome c.)	METAL (Iron (heme axial ligand).);MOD_RES (Phosphotyrosine (By similarity).)
P37108	MVLLESEQFLTELTR	YES	Signal recognition particle 14 kDa protein	SRP14;Signal recognition particle 14 kDa protein;18 kDa Alu RNA-binding protein;SRP14;	(Human)	15		MVLLESEQFL	1	136	X	X			COFRADIC;Subtiligase Based Positive Selection;other					INIT_MET (Removed.);COMPBIAS (Ala/Thr-rich.);CHAIN (Signal recognition particle 14 kDa protein.)
O75369	ESGLKVNQPASFAIR	YES	Filamin-B	FLNB;Filamin-B;ABP-278 ;ABP-280 homolog ;Actin-binding-like protein ;Beta-filamin ;Filamin homolog 1 Short=Fh1 ;Filamin-3 ;Thyroid autoantigen ;Truncated actin-binding protein Short=Truncated ABP;FLNB;	(Human)	3	ARRLTVMSLQ	ESGLKVNQPA	2297	2602								MOD_RES (Phosphothreonine.);MOD_RES (N6-acetyllysine.);MOD_RES (Phosphoserine.);MOD_RES (N6-acetyllysine (By similarity).);REGION (Interaction with FBLP1.);REGION (Hinge 1 (By similarity).);REGION (Interaction with the cytoplasmic tail of GP1BA.);REGION (Interaction with FLNA 1.);REPEAT (Filamin 1.);REPEAT (Filamin 2.);REPEAT (Filamin 3.);REPEAT (Filamin 4.);REPEAT (Filamin 5.);REPEAT (Filamin 6.…	CHAIN (Filamin-B.);REGION (Interaction with INPPL1.);REPEAT (Filamin 22.)	MOD_RES (Phosphoserine.);MOD_RES (N6-succinyllysine (By similarity).);MOD_RES (N6-acetyllysine.);REGION (Self-association site, tail (By similarity).);REGION (Hinge 2 (By similarity).);REGION (Interaction with FLNA 2.);REPEAT (Filamin 23.);REPEAT (Filamin 24.);CROSSLNK (Glycyl lysine isopeptide (Lys-Gly) (interchain with G-Cter in ISG15).);MUTAGEN (K->R: Cytoplasmic localization.)
P0DMV9	AKAAAIGIDLGTTYSCVGVFQHGKVEIIANDQGNR	no
Q9Y657	SSVGPSKPVSQPR	YES	Spindlin-1	SPIN1;Spindlin-1;Ovarian cancer-related protein ;Spindlin1;SPIN1;	(Human)	9	KKRTSHKKHR	SSVGPSKPVS	38	262									CHAIN (Spindlin-1.)	MOD_RES (N6-acetyllysine (By similarity).);MOD_RES (Phosphoserine; by AURKA.);MOD_RES (Phosphoserine.);REGION (Tudor-like domain 1.);REGION (Histone H3K4me3 and H3R8me2a binding.);REGION (Tudor-like domain 2.);REGION (Tudor-like domain 3.);MUTAGEN (W->A,R: Impaired binding to histone H3K4me3 and H3R8me2a and impaired ability to activate the Wnt signaling pathway.);MUTAGEN (Y->R: Impaired binding …
P26641	GSREEKQKPQAER	YES	Elongation factor 1-gamma	EEF1G;Elongation factor 1-gamma;eEF-1B gamma;EF1G;	(Human)	11	PKKDTPRKEK	GSREEKQKPQ	236	437								MOD_RES (N-acetylalanine.);MOD_RES (N6-acetyllysine.);MOD_RES (N6-acetyllysine (By similarity).);DOMAIN (GST N-terminal.);DOMAIN (GST C-terminal.);INIT_MET (Removed.)	CHAIN (Elongation factor 1-gamma.)	MOD_RES (N6-acetyllysine (By similarity).);MOD_RES (N6-acetyllysine; alternate.);MOD_RES (N6-malonyllysine; alternate.);DOMAIN (EF-1-gamma C-terminal.)
Q8IYS1	MRPGGERPVEGGACNGR	YES	Peptidase M20 domain-containing protein 2	PM20D2;Peptidase M20 domain-containing protein 2;Aminoacylase-1-like protein 2;P20D2;M20.971	(Human)	6		MRPGGERPVE	1	436	X	X			Subtiligase Based Positive Selection;unknown					CHAIN (Peptidase M20 domain-containing protein 2.)
Q04637	SFSKEVEER	YES	Eukaryotic translation initiation factor 4 gamma 1	EIF4G1;Eukaryotic translation initiation factor 4 gamma 1;p220;IF4G1;	(Human)	3	DRARTPATKR	SFSKEVEERS	1185	1599					Subtiligase Based Positive Selection;unknown			COMPBIAS (Poly-Glu.);COMPBIAS (Poly-Ala.);MOD_RES (Phosphothreonine.);MOD_RES (N6-acetyllysine (By similarity).);MOD_RES (Phosphoserine.);MOD_RES (N6-acetyllysine.);REGION (PABPC1-binding.);REGION (EIF4E-binding.);REGION (eIF3/EIF4A-binding.);DOMAIN (MIF4G.);MUTAGEN (KRERK->AAAAA: Loss of PABPC1 binding; when associated with 184-AAAA-187.);MUTAGEN (I->A: Loss of PABPC1 binding.);MUTAGEN (DPNQ->AA…	CHAIN (Eukaryotic translation initiation factor 4 gamma 1.)	MOD_RES (Phosphoserine; by PKC/PRKCA.);MOD_RES (Phosphoserine.);MOD_RES (Phosphothreonine.);REGION (EIF4A-binding.);REGION (Necessary but not sufficient for MKNK1- binding.);DOMAIN (MI.);DOMAIN (W2.)
P83731	AITGASLADIMAKR	YES	60S ribosomal protein L24	RPL24;60S ribosomal protein L24;60S ribosomal protein L30;RL24;	(Human)	3	RTRRAVKFQR	AITGASLADI	81	157					Subtiligase Based Positive Selection;unknown			MOD_RES (N6-acetyllysine.)	CHAIN (60S ribosomal protein L24.)	MOD_RES (Phosphothreonine.);MOD_RES (Phosphoserine.);MOD_RES (N6-acetyllysine.);MOD_RES (N6-succinyllysine (By similarity).)
P04264	NKYEDEINKR	YES	Keratin, type II cytoskeletal 1	KRT1;Keratin, type II cytoskeletal 1;67 kDa cytokeratin ;Cytokeratin-1 Short=CK-1 ;Hair alpha protein ;Keratin-1 Short=K1 ;Type-II keratin Kb1;K2C1;	(Human)	12	NMQDMVEDYR	NKYEDEINKR	268	644								COMPBIAS (Gly/Phe/Ser-rich.);MOD_RES (Phosphoserine.);MOD_RES (Omega-N-methylarginine.);REGION (Head.);REGION (Coil 1A.);REGION (Linker 1.);INIT_MET (Removed.)	CHAIN (Keratin, type II cytoskeletal 1.);REGION (Rod.);REGION (Coil 1B.)	COMPBIAS (Gly/Ser-rich.);MOD_RES (N6,N6-dimethyllysine.);MOD_RES (Phosphoserine.);REGION (Linker 12.);REGION (Coil 2.);REGION (Tail.);SITE (Stutter.)
P35241	ETKKTQNDVLHAENVKAGR	YES	Radixin	RDX;Radixin;RADI;	(Human)	11	LSSELAQARD	ETKKTQNDVL	541	583								MOD_RES (N6-succinyllysine (By similarity).);COMPBIAS (Glu-rich.);COMPBIAS (Poly-Pro.);REGION (Phosphatidylinositol binding (By similarity).);DOMAIN (FERM.);BINDING (Phosphatidylinositol (By similarity).)	CHAIN (Radixin.)	MOD_RES (Phosphothreonine; by ROCK2 (By similarity).)
