# Supplementary material for: An SDS-PAGE based proteomic approach for N-terminome profiling
Source: Royal Society of Chemistry journal article supplement (doi:10.1039/c9an01616c), 2019-01-01
Supplement: c9an01616c6.xlsx [file c9an01616c6.xlsx]

## Sheet: Table-S5
ID	Molecules in Network	Score	Focus Molecules	Top Diseases and Functions
1	ACTN1,ANXA5,CALR,Complement component 1,CRABP2,CTSC,CTSL,FABP5,FTH1,FTL,GRB2,HMGB1,HNRNPA1,HNRNPH1,Hsp90,IgG,LBR,MYL6,NFkB (complex),NME1,NUDT21,PDIA3,PTPRS,RAS,RBMX,RPL12,RPL30,RPL35A,RPL7A,RPS12,SNRPD2,STIP1,STMN1,TUBA1B,UBE2N	54	30	[RNA Damage and Repair, Protein Synthesis, Cellular Movement]
2	Akt,CS,ECH1,ENO1,ERK,ERK1/2,estrogen receptor,GLUD1,HNRNPA2B1,IGFBP2,LAMP1,MAP2K1/2,MCAM,MDH2,MDK,P38 MAPK,PDGFA,PGK1,PI3K (complex),PI3K (family),PI3K p85,PIN4,PPIA,PPT1,RBM4,RPL22,RPS16,SDCBP,SRI,SRSF1,TCR,TKT,TPM3,VEGFA,VIM	41	25	[Cellular Movement, Immune Cell Trafficking, Neurological Disease]
3	26s Proteasome,Actin,ARPC4,CBX1,CD55,ELOB,FSH,GSTP1,HEXA,Histone h3,HNRNPF,Hsp70,HSPA1A/HSPA1B,Interferon alpha,Jnk,LGMN,Lh,MAD2L1,OGA,P-TEFb,PDXK,PRDX1,PRDX4,PSMB3,PTPRF,RAN,RBX1,RDX,RNA polymerase II,Rnr,RTCB,SF3B3,TRIM28,UBE2I,XRCC6	39	24	[DNA Replication, Recombination, and Repair, Cancer, Cell Death and Survival]
4	ACO1,APOA1,APOE,APP,CRYAB,CST3,DUT,DYRK1A,FBXO22,GART,GLUL,HGF,HSPA1A/HSPA1B,Mapk,MCM6,mir-1,NELL2,PAICS,PARK7,PFAS,PLOD1,PPAT,PPIA,PSEN2,PSMC3,PSMD4,PSMD9,ST14,TAGLN2,TH,TP53,TPT1,UBE2D2,UCHL5,WDHD1	20	15	[Developmental Disorder, Hereditary Disorder, Metabolic Disease]
5	ALOX15B,AR,ARCN1,CD209,COPG1,CSF2,CTSC,CTSZ,DSC3,EGFR,HARS,IGFBP2,IKBKE,IL37,KTN1,LILRB2,LRIG1,MKNK1,MMD,NACA,PIP5K1C,PLOD2,PPA1,PTAFR,PTGES,PTPN2,ROBO1,SRSF1,STAT3,STC2,TIMP3,TNF,TPM4,UBA1,UBL4A	20	15	[Cellular Movement, Hematological System Development and Function, Immune Cell Trafficking]
6	BTF3,CACYBP,CKB,CLIP1,CTNNB1,DAB2IP,DBN1,E2F1,ENO1,EPAS1,ERG,HNRNPA1,HSPA4,HSPA6,INHBB,ITIH5,KDM4B,MAPRE1,MST1R,MSX2,NRCAM,OAT,OGT,PHACTR2,PLPP3,PSAT1,PSMD7,SBDS,SIAH1,SNRK,SPHK1,SRSF2,TP53BP2,UHRF2,WNT11	18	14	[Cellular Development, Cell Death and Survival, Embryonic Development]
7	ACTN1,ADRM1,ARF3,CA2,CBY1,CEBPA,CST5,DTD1,FGF8,GGH,GMFB,MAL,MAP3K3,MAP4,MARK2,MMP12,NDST1,NR3C1,NUP98,P38 MAPK,PFDN2,PLA2G4A,PRDX1,PRKACA,PRKCI,PSMA6,PTAFR,PTGS2,PYGB,SEMA7A,TBCA,TSPYL5,YWHAE,YWHAH,YWHAZ	18	14	[Cancer, Organismal Injury and Abnormalities, Tissue Morphology]
8	ACTN1,APLP2,ARPC2,BCL2,BUB1B,CLOCK,CTSV,IGFBP5,ILK,ITGA5,ITGA6,JAM3,JUND,KDM5B,let-7a-5p (and other miRNAs w/seed GAGGUAG),LGALS3,LGALS3BP,MFAP2,NAA15,NAA20,NAA50,NME1,NR0B2,PRDX3,REEP1,RNASET2,SERPINB5,TERT,TFAP2A,TGFB1,TMOD3,VCAN,WNT5A,WT1,WTAP	15	12	[Cancer, Organismal Injury and Abnormalities, Tumor Morphology]
9	CCDC58,EGLN	2	1	[Cancer, Organismal Injury and Abnormalities, Reproductive System Disease]
10	NFKB1,QPCTL	2	1	[Hematological System Development and Function, Hereditary Disorder, Humoral Immune Response]
11	AKR1A1,ZNF143	2	1	[Carbohydrate Metabolism, Lipid Metabolism, Small Molecule Biochemistry]
12	GRIA2,SRSF10	2	1	[Cellular Assembly and Organization, Cellular Compromise, Nervous System Development and Function]
13	SRP14,SRP9	2	1	[Cellular Compromise, Inflammatory Response, Connective Tissue Disorders]
14	NAGLU,TFEB	2	1	[Cellular Assembly and Organization, Cellular Function and Maintenance, Carbohydrate Metabolism]
15	DBT,DLAT,Mitochondrial complex 1,NDUFAB1	1	1	[Developmental Disorder, Hereditary Disorder, Metabolic Disease]
